# Supplementary material for: An evo-devo resource for wood: Comparative regulomics across dicot and conifer trees
Source: Research Square preprint supplement (doi:10.21203/rs.3.rs-7656402/v1), 2025-10-30
Supplement: Supplementary file 1 [file 2e459ec81b9506228c4ab871.xlsx]

## Sheet: Legend
Tab4
Conserved genes: complete 6-member cliques with FDR < 0.1, partiallySign 6-member cliques with at least 11/15 edges with FDR < 0.1 (remaining have FDR < 0.9), and partiallyPresent which are 5-member cliques with FDR <0.1.
Conserved genes unique: contains only unique cliques, meaning that each gene can only occur in one clique. Within each orthogroup, the clique with lowest mean clique sum (FDR) was selected.
Differentiated genes:
Differentiated genes unique:
Angio-specific genes:
Angio-specific genes unique:
Gymno-specific genes:
Gymno-specific genes unique:
Each row is a clique, GO terms and IDs, A. thaliana orthologs and symbols, and P. trichocarpa orthologs are collapsed (sep = ; ).
Note that orthogroups OG0000000, OG0000001, OG0000007, and OG0000018, were removed prior to clique identification (in contrast to the co-expressologs).

## Sheet: Conserved genes
OrthoGroup	cliqueID	conservedType	MeanCliqueSum	Asp	Birch	Cher	Nor	Scots	Lodge	GO_ID	GO_Term	Arab	Symbol	Name	Description	Poptri
N1.HOG0000170	N1.HOG0000170_463	complete	1.38483e-06	Potra2n4c9673	Bpev01.c0549.g0004.m0001	FUN_007778-T1	PA_chr01_G002759	PS_chr01_G001824	PS_chr01_G001822	GO:0003700; GO:0005634; GO:0005667; GO:0006355; GO:0030154; GO:0043565; GO:0044212; GO:0045449	DNA; nucleus; transcription factor complex; regulation of transcription, DNA; cell differentiation; sequence; transcription regulatory region DNA binding	AT4G38620	ATMYB4; MYB4	myb domain protein 4	myb domain protein 4 myb domain protein 4	Potri.004G138000; Potri.005G112000; Potri.T144800; Potri.011G040300; Potri.004G174400; Potri.010G114000; Potri.009G134000; Potri.008G128500; Potri.006G221800
N1.HOG0000170	N1.HOG0000170_457	complete	1.38488e-06	Potra2n4c9673	Bpev01.c0549.g0004.m0001	FUN_007778-T1	PA_chr01_G002759	PS_chr04_G016676	PS_chr01_G001822	GO:0003700; GO:0005634; GO:0005667; GO:0006355; GO:0030154; GO:0043565; GO:0044212; GO:0045449	DNA; nucleus; transcription factor complex; regulation of transcription, DNA; cell differentiation; sequence; transcription regulatory region DNA binding	AT4G38620	ATMYB4; MYB4	myb domain protein 4	myb domain protein 4 myb domain protein 4	Potri.004G138000; Potri.005G112000; Potri.T144800; Potri.011G040300; Potri.004G174400; Potri.010G114000; Potri.009G134000; Potri.008G128500; Potri.006G221800
N1.HOG0000170	N1.HOG0000170_409	complete	1.40233e-06	Potra2n4c9673	Bpev01.c0639.g0015.m0001	FUN_007778-T1	PA_chr01_G002759	PS_chr04_G016676	PS_chr01_G001822	GO:0003700; GO:0005634; GO:0005667; GO:0006355; GO:0030154; GO:0043565; GO:0044212; GO:0045449	DNA; nucleus; transcription factor complex; regulation of transcription, DNA; cell differentiation; sequence; transcription regulatory region DNA binding	AT4G38620	ATMYB4; MYB4	myb domain protein 4	myb domain protein 4 myb domain protein 4	Potri.004G138000; Potri.005G112000; Potri.T144800; Potri.011G040300; Potri.004G174400; Potri.010G114000; Potri.009G134000; Potri.008G128500; Potri.006G221800
N1.HOG0000170	N1.HOG0000170_427	complete	1.40233e-06	Potra2n4c9673	Bpev01.c0639.g0015.m0001	FUN_007778-T1	PA_chr01_G002759	PS_chr01_G001824	PS_chr01_G001822	GO:0003700; GO:0005634; GO:0005667; GO:0006355; GO:0030154; GO:0043565; GO:0044212; GO:0045449	DNA; nucleus; transcription factor complex; regulation of transcription, DNA; cell differentiation; sequence; transcription regulatory region DNA binding	AT4G38620	ATMYB4; MYB4	myb domain protein 4	myb domain protein 4 myb domain protein 4	Potri.004G138000; Potri.005G112000; Potri.T144800; Potri.011G040300; Potri.004G174400; Potri.010G114000; Potri.009G134000; Potri.008G128500; Potri.006G221800
N1.HOG0000170	N1.HOG0000170_214	complete	1.49333e-06	Potra2n4c9673	Bpev01.c0639.g0015.m0001	FUN_030252-T1	PA_chr04_G002634	PS_chr04_G016676	PS_chr01_G001822	GO:0003700; GO:0005634; GO:0005667; GO:0006355; GO:0030154; GO:0043565; GO:0044212; GO:0045449	DNA; nucleus; transcription factor complex; regulation of transcription, DNA; cell differentiation; sequence; transcription regulatory region DNA binding	AT4G38620	ATMYB4; MYB4	myb domain protein 4	myb domain protein 4 myb domain protein 4	Potri.004G138000; Potri.005G112000; Potri.T144800; Potri.011G040300; Potri.004G174400; Potri.010G114000; Potri.009G134000; Potri.008G128500; Potri.006G221800
N1.HOG0000170	N1.HOG0000170_247	complete	1.49338e-06	Potra2n4c9673	Bpev01.c0549.g0004.m0001	FUN_030252-T1	PA_chr04_G002634	PS_chr04_G016676	PS_chr01_G001822	GO:0003700; GO:0005634; GO:0005667; GO:0006355; GO:0030154; GO:0043565; GO:0044212; GO:0045449	DNA; nucleus; transcription factor complex; regulation of transcription, DNA; cell differentiation; sequence; transcription regulatory region DNA binding	AT4G38620	ATMYB4; MYB4	myb domain protein 4	myb domain protein 4 myb domain protein 4	Potri.004G138000; Potri.005G112000; Potri.T144800; Potri.011G040300; Potri.004G174400; Potri.010G114000; Potri.009G134000; Potri.008G128500; Potri.006G221800
N1.HOG0000170	N1.HOG0000170_213	complete	1.547e-06	Potra2n4c9673	Bpev01.c0639.g0015.m0001	FUN_030252-T1	PA_chr04_G002634	PS_chr01_G001818	PS_chr01_G001822	GO:0003700; GO:0005634; GO:0005667; GO:0006355; GO:0030154; GO:0043565; GO:0044212; GO:0045449	DNA; nucleus; transcription factor complex; regulation of transcription, DNA; cell differentiation; sequence; transcription regulatory region DNA binding	AT4G38620	ATMYB4; MYB4	myb domain protein 4	myb domain protein 4 myb domain protein 4	Potri.004G138000; Potri.005G112000; Potri.T144800; Potri.011G040300; Potri.004G174400; Potri.010G114000; Potri.009G134000; Potri.008G128500; Potri.006G221800
N1.HOG0000170	N1.HOG0000170_246	complete	1.547e-06	Potra2n4c9673	Bpev01.c0549.g0004.m0001	FUN_030252-T1	PA_chr04_G002634	PS_chr01_G001818	PS_chr01_G001822	GO:0003700; GO:0005634; GO:0005667; GO:0006355; GO:0030154; GO:0043565; GO:0044212; GO:0045449	DNA; nucleus; transcription factor complex; regulation of transcription, DNA; cell differentiation; sequence; transcription regulatory region DNA binding	AT4G38620	ATMYB4; MYB4	myb domain protein 4	myb domain protein 4 myb domain protein 4	Potri.004G138000; Potri.005G112000; Potri.T144800; Potri.011G040300; Potri.004G174400; Potri.010G114000; Potri.009G134000; Potri.008G128500; Potri.006G221800
N1.HOG0000170	N1.HOG0000170_461	complete	1.60255e-06	Potra2n4c9673	Bpev01.c0549.g0004.m0001	FUN_007778-T1	PA_chr04_G002634	PS_chr04_G016676	PS_chr01_G001822	GO:0003700; GO:0005634; GO:0005667; GO:0006355; GO:0030154; GO:0043565; GO:0044212; GO:0045449	DNA; nucleus; transcription factor complex; regulation of transcription, DNA; cell differentiation; sequence; transcription regulatory region DNA binding	AT4G38620	ATMYB4; MYB4	myb domain protein 4	myb domain protein 4 myb domain protein 4	Potri.004G138000; Potri.005G112000; Potri.T144800; Potri.011G040300; Potri.004G174400; Potri.010G114000; Potri.009G134000; Potri.008G128500; Potri.006G221800
N1.HOG0000170	N1.HOG0000170_439	complete	1.604e-06	Potra2n4c9673	Bpev01.c0639.g0015.m0001	FUN_007778-T1	PA_chr01_G002759	PS_chr01_G001822	PS_chr01_G001822	GO:0003700; GO:0005634; GO:0005667; GO:0006355; GO:0030154; GO:0043565; GO:0044212; GO:0045449	DNA; nucleus; transcription factor complex; regulation of transcription, DNA; cell differentiation; sequence; transcription regulatory region DNA binding	AT4G38620	ATMYB4; MYB4	myb domain protein 4	myb domain protein 4 myb domain protein 4	Potri.004G138000; Potri.005G112000; Potri.T144800; Potri.011G040300; Potri.004G174400; Potri.010G114000; Potri.009G134000; Potri.008G128500; Potri.006G221800
N1.HOG0000170	N1.HOG0000170_413	complete	1.62e-06	Potra2n4c9673	Bpev01.c0639.g0015.m0001	FUN_007778-T1	PA_chr04_G002634	PS_chr04_G016676	PS_chr01_G001822	GO:0003700; GO:0005634; GO:0005667; GO:0006355; GO:0030154; GO:0043565; GO:0044212; GO:0045449	DNA; nucleus; transcription factor complex; regulation of transcription, DNA; cell differentiation; sequence; transcription regulatory region DNA binding	AT4G38620	ATMYB4; MYB4	myb domain protein 4	myb domain protein 4 myb domain protein 4	Potri.004G138000; Potri.005G112000; Potri.T144800; Potri.011G040300; Potri.004G174400; Potri.010G114000; Potri.009G134000; Potri.008G128500; Potri.006G221800
N1.HOG0000170	N1.HOG0000170_661	complete	1.80402e-06	Potra2n4c9673	Bpev01.c0549.g0004.m0001	FUN_007673-T1	PA_chr01_G002759	PS_chr01_G001818	PS_chr01_G001822	GO:0003700; GO:0005634; GO:0005667; GO:0006355; GO:0030154; GO:0043565; GO:0044212; GO:0045449	DNA; nucleus; transcription factor complex; regulation of transcription, DNA; cell differentiation; sequence; transcription regulatory region DNA binding	AT4G38620	ATMYB4; MYB4	myb domain protein 4	myb domain protein 4 myb domain protein 4	Potri.004G138000; Potri.005G112000; Potri.T144800; Potri.011G040300; Potri.004G174400; Potri.010G114000; Potri.009G134000; Potri.008G128500; Potri.006G221800
N1.HOG0000170	N1.HOG0000170_673	complete	1.80402e-06	Potra2n4c9673	Bpev01.c0549.g0004.m0001	FUN_007673-T1	PA_chr01_G002759	PS_chr01_G001824	PS_chr01_G001822	GO:0003700; GO:0005634; GO:0005667; GO:0006355; GO:0030154; GO:0043565; GO:0044212; GO:0045449	DNA; nucleus; transcription factor complex; regulation of transcription, DNA; cell differentiation; sequence; transcription regulatory region DNA binding	AT4G38620	ATMYB4; MYB4	myb domain protein 4	myb domain protein 4 myb domain protein 4	Potri.004G138000; Potri.005G112000; Potri.T144800; Potri.011G040300; Potri.004G174400; Potri.010G114000; Potri.009G134000; Potri.008G128500; Potri.006G221800
N1.HOG0000170	N1.HOG0000170_667	complete	1.80407e-06	Potra2n4c9673	Bpev01.c0549.g0004.m0001	FUN_007673-T1	PA_chr01_G002759	PS_chr04_G016676	PS_chr01_G001822	GO:0003700; GO:0005634; GO:0005667; GO:0006355; GO:0030154; GO:0043565; GO:0044212; GO:0045449	DNA; nucleus; transcription factor complex; regulation of transcription, DNA; cell differentiation; sequence; transcription regulatory region DNA binding	AT4G38620	ATMYB4; MYB4	myb domain protein 4	myb domain protein 4 myb domain protein 4	Potri.004G138000; Potri.005G112000; Potri.T144800; Potri.011G040300; Potri.004G174400; Potri.010G114000; Potri.009G134000; Potri.008G128500; Potri.006G221800
N1.HOG0000170	N1.HOG0000170_607	complete	1.925e-06	Potra2n4c9673	Bpev01.c0639.g0015.m0001	FUN_007673-T1	PA_chr01_G002759	PS_chr04_G016676	PS_chr01_G001822	GO:0003700; GO:0005634; GO:0005667; GO:0006355; GO:0030154; GO:0043565; GO:0044212; GO:0045449	DNA; nucleus; transcription factor complex; regulation of transcription, DNA; cell differentiation; sequence; transcription regulatory region DNA binding	AT4G38620	ATMYB4; MYB4	myb domain protein 4	myb domain protein 4 myb domain protein 4	Potri.004G138000; Potri.005G112000; Potri.T144800; Potri.011G040300; Potri.004G174400; Potri.010G114000; Potri.009G134000; Potri.008G128500; Potri.006G221800
N1.HOG0000170	N1.HOG0000170_601	complete	1.925e-06	Potra2n4c9673	Bpev01.c0639.g0015.m0001	FUN_007673-T1	PA_chr01_G002759	PS_chr01_G001818	PS_chr01_G001822	GO:0003700; GO:0005634; GO:0005667; GO:0006355; GO:0030154; GO:0043565; GO:0044212; GO:0045449	DNA; nucleus; transcription factor complex; regulation of transcription, DNA; cell differentiation; sequence; transcription regulatory region DNA binding	AT4G38620	ATMYB4; MYB4	myb domain protein 4	myb domain protein 4 myb domain protein 4	Potri.004G138000; Potri.005G112000; Potri.T144800; Potri.011G040300; Potri.004G174400; Potri.010G114000; Potri.009G134000; Potri.008G128500; Potri.006G221800
N1.HOG0000170	N1.HOG0000170_613	complete	1.925e-06	Potra2n4c9673	Bpev01.c0639.g0015.m0001	FUN_007673-T1	PA_chr01_G002759	PS_chr01_G001824	PS_chr01_G001822	GO:0003700; GO:0005634; GO:0005667; GO:0006355; GO:0030154; GO:0043565; GO:0044212; GO:0045449	DNA; nucleus; transcription factor complex; regulation of transcription, DNA; cell differentiation; sequence; transcription regulatory region DNA binding	AT4G38620	ATMYB4; MYB4	myb domain protein 4	myb domain protein 4 myb domain protein 4	Potri.004G138000; Potri.005G112000; Potri.T144800; Potri.011G040300; Potri.004G174400; Potri.010G114000; Potri.009G134000; Potri.008G128500; Potri.006G221800
N1.HOG0000170	N1.HOG0000170_671	complete	2.02173e-06	Potra2n4c9673	Bpev01.c0549.g0004.m0001	FUN_007673-T1	PA_chr04_G002634	PS_chr04_G016676	PS_chr01_G001822	GO:0003700; GO:0005634; GO:0005667; GO:0006355; GO:0030154; GO:0043565; GO:0044212; GO:0045449	DNA; nucleus; transcription factor complex; regulation of transcription, DNA; cell differentiation; sequence; transcription regulatory region DNA binding	AT4G38620	ATMYB4; MYB4	myb domain protein 4	myb domain protein 4 myb domain protein 4	Potri.004G138000; Potri.005G112000; Potri.T144800; Potri.011G040300; Potri.004G174400; Potri.010G114000; Potri.009G134000; Potri.008G128500; Potri.006G221800
N1.HOG0000170	N1.HOG0000170_665	complete	2.07535e-06	Potra2n4c9673	Bpev01.c0549.g0004.m0001	FUN_007673-T1	PA_chr04_G002634	PS_chr01_G001818	PS_chr01_G001822	GO:0003700; GO:0005634; GO:0005667; GO:0006355; GO:0030154; GO:0043565; GO:0044212; GO:0045449	DNA; nucleus; transcription factor complex; regulation of transcription, DNA; cell differentiation; sequence; transcription regulatory region DNA binding	AT4G38620	ATMYB4; MYB4	myb domain protein 4	myb domain protein 4 myb domain protein 4	Potri.004G138000; Potri.005G112000; Potri.T144800; Potri.011G040300; Potri.004G174400; Potri.010G114000; Potri.009G134000; Potri.008G128500; Potri.006G221800
N1.HOG0000170	N1.HOG0000170_619	complete	2.12667e-06	Potra2n4c9673	Bpev01.c0639.g0015.m0001	FUN_007673-T1	PA_chr01_G002759	PS_chr01_G001822	PS_chr01_G001822	GO:0003700; GO:0005634; GO:0005667; GO:0006355; GO:0030154; GO:0043565; GO:0044212; GO:0045449	DNA; nucleus; transcription factor complex; regulation of transcription, DNA; cell differentiation; sequence; transcription regulatory region DNA binding	AT4G38620	ATMYB4; MYB4	myb domain protein 4	myb domain protein 4 myb domain protein 4	Potri.004G138000; Potri.005G112000; Potri.T144800; Potri.011G040300; Potri.004G174400; Potri.010G114000; Potri.009G134000; Potri.008G128500; Potri.006G221800
N1.HOG0000170	N1.HOG0000170_611	complete	2.14267e-06	Potra2n4c9673	Bpev01.c0639.g0015.m0001	FUN_007673-T1	PA_chr04_G002634	PS_chr04_G016676	PS_chr01_G001822	GO:0003700; GO:0005634; GO:0005667; GO:0006355; GO:0030154; GO:0043565; GO:0044212; GO:0045449	DNA; nucleus; transcription factor complex; regulation of transcription, DNA; cell differentiation; sequence; transcription regulatory region DNA binding	AT4G38620	ATMYB4; MYB4	myb domain protein 4	myb domain protein 4 myb domain protein 4	Potri.004G138000; Potri.005G112000; Potri.T144800; Potri.011G040300; Potri.004G174400; Potri.010G114000; Potri.009G134000; Potri.008G128500; Potri.006G221800
N1.HOG0000170	N1.HOG0000170_605	complete	2.19633e-06	Potra2n4c9673	Bpev01.c0639.g0015.m0001	FUN_007673-T1	PA_chr04_G002634	PS_chr01_G001818	PS_chr01_G001822	GO:0003700; GO:0005634; GO:0005667; GO:0006355; GO:0030154; GO:0043565; GO:0044212; GO:0045449	DNA; nucleus; transcription factor complex; regulation of transcription, DNA; cell differentiation; sequence; transcription regulatory region DNA binding	AT4G38620	ATMYB4; MYB4	myb domain protein 4	myb domain protein 4 myb domain protein 4	Potri.004G138000; Potri.005G112000; Potri.T144800; Potri.011G040300; Potri.004G174400; Potri.010G114000; Potri.009G134000; Potri.008G128500; Potri.006G221800
N1.HOG0000170	N1.HOG0000170_262	complete	2.70333e-06	Potra2n4c9673	Bpev01.c0639.g0015.m0001	FUN_030252-T1	PA_chr01_G002769	PS_chr04_G016676	PS_chr01_G001822	GO:0003700; GO:0005634; GO:0005667; GO:0006355; GO:0030154; GO:0043565; GO:0044212; GO:0045449	DNA; nucleus; transcription factor complex; regulation of transcription, DNA; cell differentiation; sequence; transcription regulatory region DNA binding	AT4G38620	ATMYB4; MYB4	myb domain protein 4	myb domain protein 4 myb domain protein 4	Potri.004G138000; Potri.005G112000; Potri.T144800; Potri.011G040300; Potri.004G174400; Potri.010G114000; Potri.009G134000; Potri.008G128500; Potri.006G221800
N1.HOG0000170	N1.HOG0000170_297	complete	2.70333e-06	Potra2n4c9673	Bpev01.c0549.g0004.m0001	FUN_030252-T1	PA_chr01_G002769	PS_chr01_G001824	PS_chr01_G001822	GO:0003700; GO:0005634; GO:0005667; GO:0006355; GO:0030154; GO:0043565; GO:0044212; GO:0045449	DNA; nucleus; transcription factor complex; regulation of transcription, DNA; cell differentiation; sequence; transcription regulatory region DNA binding	AT4G38620	ATMYB4; MYB4	myb domain protein 4	myb domain protein 4 myb domain protein 4	Potri.004G138000; Potri.005G112000; Potri.T144800; Potri.011G040300; Potri.004G174400; Potri.010G114000; Potri.009G134000; Potri.008G128500; Potri.006G221800
N1.HOG0000170	N1.HOG0000170_261	complete	2.70333e-06	Potra2n4c9673	Bpev01.c0639.g0015.m0001	FUN_030252-T1	PA_chr01_G002769	PS_chr01_G001818	PS_chr01_G001822	GO:0003700; GO:0005634; GO:0005667; GO:0006355; GO:0030154; GO:0043565; GO:0044212; GO:0045449	DNA; nucleus; transcription factor complex; regulation of transcription, DNA; cell differentiation; sequence; transcription regulatory region DNA binding	AT4G38620	ATMYB4; MYB4	myb domain protein 4	myb domain protein 4 myb domain protein 4	Potri.004G138000; Potri.005G112000; Potri.T144800; Potri.011G040300; Potri.004G174400; Potri.010G114000; Potri.009G134000; Potri.008G128500; Potri.006G221800
N1.HOG0000170	N1.HOG0000170_295	complete	2.70333e-06	Potra2n4c9673	Bpev01.c0549.g0004.m0001	FUN_030252-T1	PA_chr01_G002769	PS_chr01_G001818	PS_chr01_G001822	GO:0003700; GO:0005634; GO:0005667; GO:0006355; GO:0030154; GO:0043565; GO:0044212; GO:0045449	DNA; nucleus; transcription factor complex; regulation of transcription, DNA; cell differentiation; sequence; transcription regulatory region DNA binding	AT4G38620	ATMYB4; MYB4	myb domain protein 4	myb domain protein 4 myb domain protein 4	Potri.004G138000; Potri.005G112000; Potri.T144800; Potri.011G040300; Potri.004G174400; Potri.010G114000; Potri.009G134000; Potri.008G128500; Potri.006G221800
N1.HOG0000170	N1.HOG0000170_263	complete	2.70333e-06	Potra2n4c9673	Bpev01.c0639.g0015.m0001	FUN_030252-T1	PA_chr01_G002769	PS_chr01_G001824	PS_chr01_G001822	GO:0003700; GO:0005634; GO:0005667; GO:0006355; GO:0030154; GO:0043565; GO:0044212; GO:0045449	DNA; nucleus; transcription factor complex; regulation of transcription, DNA; cell differentiation; sequence; transcription regulatory region DNA binding	AT4G38620	ATMYB4; MYB4	myb domain protein 4	myb domain protein 4 myb domain protein 4	Potri.004G138000; Potri.005G112000; Potri.T144800; Potri.011G040300; Potri.004G174400; Potri.010G114000; Potri.009G134000; Potri.008G128500; Potri.006G221800
N1.HOG0000170	N1.HOG0000170_296	complete	2.70338e-06	Potra2n4c9673	Bpev01.c0549.g0004.m0001	FUN_030252-T1	PA_chr01_G002769	PS_chr04_G016676	PS_chr01_G001822	GO:0003700; GO:0005634; GO:0005667; GO:0006355; GO:0030154; GO:0043565; GO:0044212; GO:0045449	DNA; nucleus; transcription factor complex; regulation of transcription, DNA; cell differentiation; sequence; transcription regulatory region DNA binding	AT4G38620	ATMYB4; MYB4	myb domain protein 4	myb domain protein 4 myb domain protein 4	Potri.004G138000; Potri.005G112000; Potri.T144800; Potri.011G040300; Potri.004G174400; Potri.010G114000; Potri.009G134000; Potri.008G128500; Potri.006G221800
N1.HOG0000170	N1.HOG0000170_464	complete	2.8125e-06	Potra2n4c9673	Bpev01.c0549.g0004.m0001	FUN_007778-T1	PA_chr01_G002769	PS_chr01_G001824	PS_chr01_G001822	GO:0003700; GO:0005634; GO:0005667; GO:0006355; GO:0030154; GO:0043565; GO:0044212; GO:0045449	DNA; nucleus; transcription factor complex; regulation of transcription, DNA; cell differentiation; sequence; transcription regulatory region DNA binding	AT4G38620	ATMYB4; MYB4	myb domain protein 4	myb domain protein 4 myb domain protein 4	Potri.004G138000; Potri.005G112000; Potri.T144800; Potri.011G040300; Potri.004G174400; Potri.010G114000; Potri.009G134000; Potri.008G128500; Potri.006G221800
N1.HOG0000170	N1.HOG0000170_458	complete	2.81255e-06	Potra2n4c9673	Bpev01.c0549.g0004.m0001	FUN_007778-T1	PA_chr01_G002769	PS_chr04_G016676	PS_chr01_G001822	GO:0003700; GO:0005634; GO:0005667; GO:0006355; GO:0030154; GO:0043565; GO:0044212; GO:0045449	DNA; nucleus; transcription factor complex; regulation of transcription, DNA; cell differentiation; sequence; transcription regulatory region DNA binding	AT4G38620	ATMYB4; MYB4	myb domain protein 4	myb domain protein 4 myb domain protein 4	Potri.004G138000; Potri.005G112000; Potri.T144800; Potri.011G040300; Potri.004G174400; Potri.010G114000; Potri.009G134000; Potri.008G128500; Potri.006G221800
N1.HOG0000170	N1.HOG0000170_410	complete	2.83e-06	Potra2n4c9673	Bpev01.c0639.g0015.m0001	FUN_007778-T1	PA_chr01_G002769	PS_chr04_G016676	PS_chr01_G001822	GO:0003700; GO:0005634; GO:0005667; GO:0006355; GO:0030154; GO:0043565; GO:0044212; GO:0045449	DNA; nucleus; transcription factor complex; regulation of transcription, DNA; cell differentiation; sequence; transcription regulatory region DNA binding	AT4G38620	ATMYB4; MYB4	myb domain protein 4	myb domain protein 4 myb domain protein 4	Potri.004G138000; Potri.005G112000; Potri.T144800; Potri.011G040300; Potri.004G174400; Potri.010G114000; Potri.009G134000; Potri.008G128500; Potri.006G221800
N1.HOG0000170	N1.HOG0000170_428	complete	2.83e-06	Potra2n4c9673	Bpev01.c0639.g0015.m0001	FUN_007778-T1	PA_chr01_G002769	PS_chr01_G001824	PS_chr01_G001822	GO:0003700; GO:0005634; GO:0005667; GO:0006355; GO:0030154; GO:0043565; GO:0044212; GO:0045449	DNA; nucleus; transcription factor complex; regulation of transcription, DNA; cell differentiation; sequence; transcription regulatory region DNA binding	AT4G38620	ATMYB4; MYB4	myb domain protein 4	myb domain protein 4 myb domain protein 4	Potri.004G138000; Potri.005G112000; Potri.T144800; Potri.011G040300; Potri.004G174400; Potri.010G114000; Potri.009G134000; Potri.008G128500; Potri.006G221800
N1.HOG0000170	N1.HOG0000170_469	complete	2.8465e-06	Potra2n4c9673	Bpev01.c0549.g0004.m0001	FUN_007778-T1	PA_chr01_G002759	PS_chr01_G001822	PS_chr01_G001822	GO:0003700; GO:0005634; GO:0005667; GO:0006355; GO:0030154; GO:0043565; GO:0044212; GO:0045449	DNA; nucleus; transcription factor complex; regulation of transcription, DNA; cell differentiation; sequence; transcription regulatory region DNA binding	AT4G38620	ATMYB4; MYB4	myb domain protein 4	myb domain protein 4 myb domain protein 4	Potri.004G138000; Potri.005G112000; Potri.T144800; Potri.011G040300; Potri.004G174400; Potri.010G114000; Potri.009G134000; Potri.008G128500; Potri.006G221800
N1.HOG0000170	N1.HOG0000170_264	complete	2.905e-06	Potra2n4c9673	Bpev01.c0639.g0015.m0001	FUN_030252-T1	PA_chr01_G002769	PS_chr01_G001822	PS_chr01_G001822	GO:0003700; GO:0005634; GO:0005667; GO:0006355; GO:0030154; GO:0043565; GO:0044212; GO:0045449	DNA; nucleus; transcription factor complex; regulation of transcription, DNA; cell differentiation; sequence; transcription regulatory region DNA binding	AT4G38620	ATMYB4; MYB4	myb domain protein 4	myb domain protein 4 myb domain protein 4	Potri.004G138000; Potri.005G112000; Potri.T144800; Potri.011G040300; Potri.004G174400; Potri.010G114000; Potri.009G134000; Potri.008G128500; Potri.006G221800
N1.HOG0000170	N1.HOG0000170_440	complete	3.03167e-06	Potra2n4c9673	Bpev01.c0639.g0015.m0001	FUN_007778-T1	PA_chr01_G002769	PS_chr01_G001822	PS_chr01_G001822	GO:0003700; GO:0005634; GO:0005667; GO:0006355; GO:0030154; GO:0043565; GO:0044212; GO:0045449	DNA; nucleus; transcription factor complex; regulation of transcription, DNA; cell differentiation; sequence; transcription regulatory region DNA binding	AT4G38620	ATMYB4; MYB4	myb domain protein 4	myb domain protein 4 myb domain protein 4	Potri.004G138000; Potri.005G112000; Potri.T144800; Potri.011G040300; Potri.004G174400; Potri.010G114000; Potri.009G134000; Potri.008G128500; Potri.006G221800
N1.HOG0000170	N1.HOG0000170_674	complete	3.23168e-06	Potra2n4c9673	Bpev01.c0549.g0004.m0001	FUN_007673-T1	PA_chr01_G002769	PS_chr01_G001824	PS_chr01_G001822	GO:0003700; GO:0005634; GO:0005667; GO:0006355; GO:0030154; GO:0043565; GO:0044212; GO:0045449	DNA; nucleus; transcription factor complex; regulation of transcription, DNA; cell differentiation; sequence; transcription regulatory region DNA binding	AT4G38620	ATMYB4; MYB4	myb domain protein 4	myb domain protein 4 myb domain protein 4	Potri.004G138000; Potri.005G112000; Potri.T144800; Potri.011G040300; Potri.004G174400; Potri.010G114000; Potri.009G134000; Potri.008G128500; Potri.006G221800
N1.HOG0000170	N1.HOG0000170_662	complete	3.23168e-06	Potra2n4c9673	Bpev01.c0549.g0004.m0001	FUN_007673-T1	PA_chr01_G002769	PS_chr01_G001818	PS_chr01_G001822	GO:0003700; GO:0005634; GO:0005667; GO:0006355; GO:0030154; GO:0043565; GO:0044212; GO:0045449	DNA; nucleus; transcription factor complex; regulation of transcription, DNA; cell differentiation; sequence; transcription regulatory region DNA binding	AT4G38620	ATMYB4; MYB4	myb domain protein 4	myb domain protein 4 myb domain protein 4	Potri.004G138000; Potri.005G112000; Potri.T144800; Potri.011G040300; Potri.004G174400; Potri.010G114000; Potri.009G134000; Potri.008G128500; Potri.006G221800
N1.HOG0000170	N1.HOG0000170_668	complete	3.23173e-06	Potra2n4c9673	Bpev01.c0549.g0004.m0001	FUN_007673-T1	PA_chr01_G002769	PS_chr04_G016676	PS_chr01_G001822	GO:0003700; GO:0005634; GO:0005667; GO:0006355; GO:0030154; GO:0043565; GO:0044212; GO:0045449	DNA; nucleus; transcription factor complex; regulation of transcription, DNA; cell differentiation; sequence; transcription regulatory region DNA binding	AT4G38620	ATMYB4; MYB4	myb domain protein 4	myb domain protein 4 myb domain protein 4	Potri.004G138000; Potri.005G112000; Potri.T144800; Potri.011G040300; Potri.004G174400; Potri.010G114000; Potri.009G134000; Potri.008G128500; Potri.006G221800
N1.HOG0000170	N1.HOG0000170_679	complete	3.26568e-06	Potra2n4c9673	Bpev01.c0549.g0004.m0001	FUN_007673-T1	PA_chr01_G002759	PS_chr01_G001822	PS_chr01_G001822	GO:0003700; GO:0005634; GO:0005667; GO:0006355; GO:0030154; GO:0043565; GO:0044212; GO:0045449	DNA; nucleus; transcription factor complex; regulation of transcription, DNA; cell differentiation; sequence; transcription regulatory region DNA binding	AT4G38620	ATMYB4; MYB4	myb domain protein 4	myb domain protein 4 myb domain protein 4	Potri.004G138000; Potri.005G112000; Potri.T144800; Potri.011G040300; Potri.004G174400; Potri.010G114000; Potri.009G134000; Potri.008G128500; Potri.006G221800
N1.HOG0000170	N1.HOG0000170_608	complete	3.35267e-06	Potra2n4c9673	Bpev01.c0639.g0015.m0001	FUN_007673-T1	PA_chr01_G002769	PS_chr04_G016676	PS_chr01_G001822	GO:0003700; GO:0005634; GO:0005667; GO:0006355; GO:0030154; GO:0043565; GO:0044212; GO:0045449	DNA; nucleus; transcription factor complex; regulation of transcription, DNA; cell differentiation; sequence; transcription regulatory region DNA binding	AT4G38620	ATMYB4; MYB4	myb domain protein 4	myb domain protein 4 myb domain protein 4	Potri.004G138000; Potri.005G112000; Potri.T144800; Potri.011G040300; Potri.004G174400; Potri.010G114000; Potri.009G134000; Potri.008G128500; Potri.006G221800
N1.HOG0000170	N1.HOG0000170_602	complete	3.35267e-06	Potra2n4c9673	Bpev01.c0639.g0015.m0001	FUN_007673-T1	PA_chr01_G002769	PS_chr01_G001818	PS_chr01_G001822	GO:0003700; GO:0005634; GO:0005667; GO:0006355; GO:0030154; GO:0043565; GO:0044212; GO:0045449	DNA; nucleus; transcription factor complex; regulation of transcription, DNA; cell differentiation; sequence; transcription regulatory region DNA binding	AT4G38620	ATMYB4; MYB4	myb domain protein 4	myb domain protein 4 myb domain protein 4	Potri.004G138000; Potri.005G112000; Potri.T144800; Potri.011G040300; Potri.004G174400; Potri.010G114000; Potri.009G134000; Potri.008G128500; Potri.006G221800
N1.HOG0000170	N1.HOG0000170_614	complete	3.35267e-06	Potra2n4c9673	Bpev01.c0639.g0015.m0001	FUN_007673-T1	PA_chr01_G002769	PS_chr01_G001824	PS_chr01_G001822	GO:0003700; GO:0005634; GO:0005667; GO:0006355; GO:0030154; GO:0043565; GO:0044212; GO:0045449	DNA; nucleus; transcription factor complex; regulation of transcription, DNA; cell differentiation; sequence; transcription regulatory region DNA binding	AT4G38620	ATMYB4; MYB4	myb domain protein 4	myb domain protein 4 myb domain protein 4	Potri.004G138000; Potri.005G112000; Potri.T144800; Potri.011G040300; Potri.004G174400; Potri.010G114000; Potri.009G134000; Potri.008G128500; Potri.006G221800
N1.HOG0000170	N1.HOG0000170_620	complete	3.55433e-06	Potra2n4c9673	Bpev01.c0639.g0015.m0001	FUN_007673-T1	PA_chr01_G002769	PS_chr01_G001822	PS_chr01_G001822	GO:0003700; GO:0005634; GO:0005667; GO:0006355; GO:0030154; GO:0043565; GO:0044212; GO:0045449	DNA; nucleus; transcription factor complex; regulation of transcription, DNA; cell differentiation; sequence; transcription regulatory region DNA binding	AT4G38620	ATMYB4; MYB4	myb domain protein 4	myb domain protein 4 myb domain protein 4	Potri.004G138000; Potri.005G112000; Potri.T144800; Potri.011G040300; Potri.004G174400; Potri.010G114000; Potri.009G134000; Potri.008G128500; Potri.006G221800
N1.HOG0000170	N1.HOG0000170_298	complete	4.165e-06	Potra2n4c9673	Bpev01.c0549.g0004.m0001	FUN_030252-T1	PA_chr01_G002769	PS_chr01_G001822	PS_chr01_G001822	GO:0003700; GO:0005634; GO:0005667; GO:0006355; GO:0030154; GO:0043565; GO:0044212; GO:0045449	DNA; nucleus; transcription factor complex; regulation of transcription, DNA; cell differentiation; sequence; transcription regulatory region DNA binding	AT4G38620	ATMYB4; MYB4	myb domain protein 4	myb domain protein 4 myb domain protein 4	Potri.004G138000; Potri.005G112000; Potri.T144800; Potri.011G040300; Potri.004G174400; Potri.010G114000; Potri.009G134000; Potri.008G128500; Potri.006G221800
N1.HOG0000170	N1.HOG0000170_470	complete	4.27417e-06	Potra2n4c9673	Bpev01.c0549.g0004.m0001	FUN_007778-T1	PA_chr01_G002769	PS_chr01_G001822	PS_chr01_G001822	GO:0003700; GO:0005634; GO:0005667; GO:0006355; GO:0030154; GO:0043565; GO:0044212; GO:0045449	DNA; nucleus; transcription factor complex; regulation of transcription, DNA; cell differentiation; sequence; transcription regulatory region DNA binding	AT4G38620	ATMYB4; MYB4	myb domain protein 4	myb domain protein 4 myb domain protein 4	Potri.004G138000; Potri.005G112000; Potri.T144800; Potri.011G040300; Potri.004G174400; Potri.010G114000; Potri.009G134000; Potri.008G128500; Potri.006G221800
N1.HOG0000170	N1.HOG0000170_680	complete	4.69335e-06	Potra2n4c9673	Bpev01.c0549.g0004.m0001	FUN_007673-T1	PA_chr01_G002769	PS_chr01_G001822	PS_chr01_G001822	GO:0003700; GO:0005634; GO:0005667; GO:0006355; GO:0030154; GO:0043565; GO:0044212; GO:0045449	DNA; nucleus; transcription factor complex; regulation of transcription, DNA; cell differentiation; sequence; transcription regulatory region DNA binding	AT4G38620	ATMYB4; MYB4	myb domain protein 4	myb domain protein 4 myb domain protein 4	Potri.004G138000; Potri.005G112000; Potri.T144800; Potri.011G040300; Potri.004G174400; Potri.010G114000; Potri.009G134000; Potri.008G128500; Potri.006G221800
N1.HOG0000170	N1.HOG0000170_459	complete	5.61922e-06	Potra2n4c9673	Bpev01.c0549.g0004.m0001	FUN_007778-T1	PA_chr01_G002758	PS_chr04_G016676	PS_chr01_G001822	GO:0003700; GO:0005634; GO:0005667; GO:0006355; GO:0030154; GO:0043565; GO:0044212; GO:0045449	DNA; nucleus; transcription factor complex; regulation of transcription, DNA; cell differentiation; sequence; transcription regulatory region DNA binding	AT4G38620	ATMYB4; MYB4	myb domain protein 4	myb domain protein 4 myb domain protein 4	Potri.004G138000; Potri.005G112000; Potri.T144800; Potri.011G040300; Potri.004G174400; Potri.010G114000; Potri.009G134000; Potri.008G128500; Potri.006G221800
N1.HOG0000170	N1.HOG0000170_465	complete	5.61947e-06	Potra2n4c9673	Bpev01.c0549.g0004.m0001	FUN_007778-T1	PA_chr01_G002758	PS_chr01_G001824	PS_chr01_G001822	GO:0003700; GO:0005634; GO:0005667; GO:0006355; GO:0030154; GO:0043565; GO:0044212; GO:0045449	DNA; nucleus; transcription factor complex; regulation of transcription, DNA; cell differentiation; sequence; transcription regulatory region DNA binding	AT4G38620	ATMYB4; MYB4	myb domain protein 4	myb domain protein 4 myb domain protein 4	Potri.004G138000; Potri.005G112000; Potri.T144800; Potri.011G040300; Potri.004G174400; Potri.010G114000; Potri.009G134000; Potri.008G128500; Potri.006G221800
N1.HOG0000170	N1.HOG0000170_411	complete	5.63667e-06	Potra2n4c9673	Bpev01.c0639.g0015.m0001	FUN_007778-T1	PA_chr01_G002758	PS_chr04_G016676	PS_chr01_G001822	GO:0003700; GO:0005634; GO:0005667; GO:0006355; GO:0030154; GO:0043565; GO:0044212; GO:0045449	DNA; nucleus; transcription factor complex; regulation of transcription, DNA; cell differentiation; sequence; transcription regulatory region DNA binding	AT4G38620	ATMYB4; MYB4	myb domain protein 4	myb domain protein 4 myb domain protein 4	Potri.004G138000; Potri.005G112000; Potri.T144800; Potri.011G040300; Potri.004G174400; Potri.010G114000; Potri.009G134000; Potri.008G128500; Potri.006G221800
N1.HOG0000170	N1.HOG0000170_429	complete	5.63697e-06	Potra2n4c9673	Bpev01.c0639.g0015.m0001	FUN_007778-T1	PA_chr01_G002758	PS_chr01_G001824	PS_chr01_G001822	GO:0003700; GO:0005634; GO:0005667; GO:0006355; GO:0030154; GO:0043565; GO:0044212; GO:0045449	DNA; nucleus; transcription factor complex; regulation of transcription, DNA; cell differentiation; sequence; transcription regulatory region DNA binding	AT4G38620	ATMYB4; MYB4	myb domain protein 4	myb domain protein 4 myb domain protein 4	Potri.004G138000; Potri.005G112000; Potri.T144800; Potri.011G040300; Potri.004G174400; Potri.010G114000; Potri.009G134000; Potri.008G128500; Potri.006G221800
N1.HOG0000170	N1.HOG0000170_441	complete	5.83833e-06	Potra2n4c9673	Bpev01.c0639.g0015.m0001	FUN_007778-T1	PA_chr01_G002758	PS_chr01_G001822	PS_chr01_G001822	GO:0003700; GO:0005634; GO:0005667; GO:0006355; GO:0030154; GO:0043565; GO:0044212; GO:0045449	DNA; nucleus; transcription factor complex; regulation of transcription, DNA; cell differentiation; sequence; transcription regulatory region DNA binding	AT4G38620	ATMYB4; MYB4	myb domain protein 4	myb domain protein 4 myb domain protein 4	Potri.004G138000; Potri.005G112000; Potri.T144800; Potri.011G040300; Potri.004G174400; Potri.010G114000; Potri.009G134000; Potri.008G128500; Potri.006G221800
N1.HOG0000170	N1.HOG0000170_669	complete	6.0384e-06	Potra2n4c9673	Bpev01.c0549.g0004.m0001	FUN_007673-T1	PA_chr01_G002758	PS_chr04_G016676	PS_chr01_G001822	GO:0003700; GO:0005634; GO:0005667; GO:0006355; GO:0030154; GO:0043565; GO:0044212; GO:0045449	DNA; nucleus; transcription factor complex; regulation of transcription, DNA; cell differentiation; sequence; transcription regulatory region DNA binding	AT4G38620	ATMYB4; MYB4	myb domain protein 4	myb domain protein 4 myb domain protein 4	Potri.004G138000; Potri.005G112000; Potri.T144800; Potri.011G040300; Potri.004G174400; Potri.010G114000; Potri.009G134000; Potri.008G128500; Potri.006G221800
N1.HOG0000170	N1.HOG0000170_675	complete	6.03865e-06	Potra2n4c9673	Bpev01.c0549.g0004.m0001	FUN_007673-T1	PA_chr01_G002758	PS_chr01_G001824	PS_chr01_G001822	GO:0003700; GO:0005634; GO:0005667; GO:0006355; GO:0030154; GO:0043565; GO:0044212; GO:0045449	DNA; nucleus; transcription factor complex; regulation of transcription, DNA; cell differentiation; sequence; transcription regulatory region DNA binding	AT4G38620	ATMYB4; MYB4	myb domain protein 4	myb domain protein 4 myb domain protein 4	Potri.004G138000; Potri.005G112000; Potri.T144800; Potri.011G040300; Potri.004G174400; Potri.010G114000; Potri.009G134000; Potri.008G128500; Potri.006G221800
N1.HOG0000170	N1.HOG0000170_663	complete	6.03914e-06	Potra2n4c9673	Bpev01.c0549.g0004.m0001	FUN_007673-T1	PA_chr01_G002758	PS_chr01_G001818	PS_chr01_G001822	GO:0003700; GO:0005634; GO:0005667; GO:0006355; GO:0030154; GO:0043565; GO:0044212; GO:0045449	DNA; nucleus; transcription factor complex; regulation of transcription, DNA; cell differentiation; sequence; transcription regulatory region DNA binding	AT4G38620	ATMYB4; MYB4	myb domain protein 4	myb domain protein 4 myb domain protein 4	Potri.004G138000; Potri.005G112000; Potri.T144800; Potri.011G040300; Potri.004G174400; Potri.010G114000; Potri.009G134000; Potri.008G128500; Potri.006G221800
N1.HOG0000170	N1.HOG0000170_609	complete	6.15933e-06	Potra2n4c9673	Bpev01.c0639.g0015.m0001	FUN_007673-T1	PA_chr01_G002758	PS_chr04_G016676	PS_chr01_G001822	GO:0003700; GO:0005634; GO:0005667; GO:0006355; GO:0030154; GO:0043565; GO:0044212; GO:0045449	DNA; nucleus; transcription factor complex; regulation of transcription, DNA; cell differentiation; sequence; transcription regulatory region DNA binding	AT4G38620	ATMYB4; MYB4	myb domain protein 4	myb domain protein 4 myb domain protein 4	Potri.004G138000; Potri.005G112000; Potri.T144800; Potri.011G040300; Potri.004G174400; Potri.010G114000; Potri.009G134000; Potri.008G128500; Potri.006G221800
N1.HOG0000170	N1.HOG0000170_615	complete	6.15963e-06	Potra2n4c9673	Bpev01.c0639.g0015.m0001	FUN_007673-T1	PA_chr01_G002758	PS_chr01_G001824	PS_chr01_G001822	GO:0003700; GO:0005634; GO:0005667; GO:0006355; GO:0030154; GO:0043565; GO:0044212; GO:0045449	DNA; nucleus; transcription factor complex; regulation of transcription, DNA; cell differentiation; sequence; transcription regulatory region DNA binding	AT4G38620	ATMYB4; MYB4	myb domain protein 4	myb domain protein 4 myb domain protein 4	Potri.004G138000; Potri.005G112000; Potri.T144800; Potri.011G040300; Potri.004G174400; Potri.010G114000; Potri.009G134000; Potri.008G128500; Potri.006G221800
N1.HOG0000170	N1.HOG0000170_603	complete	6.16013e-06	Potra2n4c9673	Bpev01.c0639.g0015.m0001	FUN_007673-T1	PA_chr01_G002758	PS_chr01_G001818	PS_chr01_G001822	GO:0003700; GO:0005634; GO:0005667; GO:0006355; GO:0030154; GO:0043565; GO:0044212; GO:0045449	DNA; nucleus; transcription factor complex; regulation of transcription, DNA; cell differentiation; sequence; transcription regulatory region DNA binding	AT4G38620	ATMYB4; MYB4	myb domain protein 4	myb domain protein 4 myb domain protein 4	Potri.004G138000; Potri.005G112000; Potri.T144800; Potri.011G040300; Potri.004G174400; Potri.010G114000; Potri.009G134000; Potri.008G128500; Potri.006G221800
N1.HOG0000170	N1.HOG0000170_621	complete	6.361e-06	Potra2n4c9673	Bpev01.c0639.g0015.m0001	FUN_007673-T1	PA_chr01_G002758	PS_chr01_G001822	PS_chr01_G001822	GO:0003700; GO:0005634; GO:0005667; GO:0006355; GO:0030154; GO:0043565; GO:0044212; GO:0045449	DNA; nucleus; transcription factor complex; regulation of transcription, DNA; cell differentiation; sequence; transcription regulatory region DNA binding	AT4G38620	ATMYB4; MYB4	myb domain protein 4	myb domain protein 4 myb domain protein 4	Potri.004G138000; Potri.005G112000; Potri.T144800; Potri.011G040300; Potri.004G174400; Potri.010G114000; Potri.009G134000; Potri.008G128500; Potri.006G221800
N1.HOG0000170	N1.HOG0000170_471	complete	7.08083e-06	Potra2n4c9673	Bpev01.c0549.g0004.m0001	FUN_007778-T1	PA_chr01_G002758	PS_chr01_G001822	PS_chr01_G001822	GO:0003700; GO:0005634; GO:0005667; GO:0006355; GO:0030154; GO:0043565; GO:0044212; GO:0045449	DNA; nucleus; transcription factor complex; regulation of transcription, DNA; cell differentiation; sequence; transcription regulatory region DNA binding	AT4G38620	ATMYB4; MYB4	myb domain protein 4	myb domain protein 4 myb domain protein 4	Potri.004G138000; Potri.005G112000; Potri.T144800; Potri.011G040300; Potri.004G174400; Potri.010G114000; Potri.009G134000; Potri.008G128500; Potri.006G221800
N1.HOG0000170	N1.HOG0000170_681	complete	7.50002e-06	Potra2n4c9673	Bpev01.c0549.g0004.m0001	FUN_007673-T1	PA_chr01_G002758	PS_chr01_G001822	PS_chr01_G001822	GO:0003700; GO:0005634; GO:0005667; GO:0006355; GO:0030154; GO:0043565; GO:0044212; GO:0045449	DNA; nucleus; transcription factor complex; regulation of transcription, DNA; cell differentiation; sequence; transcription regulatory region DNA binding	AT4G38620	ATMYB4; MYB4	myb domain protein 4	myb domain protein 4 myb domain protein 4	Potri.004G138000; Potri.005G112000; Potri.T144800; Potri.011G040300; Potri.004G174400; Potri.010G114000; Potri.009G134000; Potri.008G128500; Potri.006G221800
N1.HOG0000170	N1.HOG0000170_466	complete	7.5525e-06	Potra2n4c9673	Bpev01.c0549.g0004.m0001	FUN_007778-T1	PA_chr01_G002762	PS_chr01_G001824	PS_chr01_G001822	GO:0003700; GO:0005634; GO:0005667; GO:0006355; GO:0030154; GO:0043565; GO:0044212; GO:0045449	DNA; nucleus; transcription factor complex; regulation of transcription, DNA; cell differentiation; sequence; transcription regulatory region DNA binding	AT4G38620	ATMYB4; MYB4	myb domain protein 4	myb domain protein 4 myb domain protein 4	Potri.004G138000; Potri.005G112000; Potri.T144800; Potri.011G040300; Potri.004G174400; Potri.010G114000; Potri.009G134000; Potri.008G128500; Potri.006G221800
N1.HOG0000170	N1.HOG0000170_460	complete	7.55255e-06	Potra2n4c9673	Bpev01.c0549.g0004.m0001	FUN_007778-T1	PA_chr01_G002762	PS_chr04_G016676	PS_chr01_G001822	GO:0003700; GO:0005634; GO:0005667; GO:0006355; GO:0030154; GO:0043565; GO:0044212; GO:0045449	DNA; nucleus; transcription factor complex; regulation of transcription, DNA; cell differentiation; sequence; transcription regulatory region DNA binding	AT4G38620	ATMYB4; MYB4	myb domain protein 4	myb domain protein 4 myb domain protein 4	Potri.004G138000; Potri.005G112000; Potri.T144800; Potri.011G040300; Potri.004G174400; Potri.010G114000; Potri.009G134000; Potri.008G128500; Potri.006G221800
N1.HOG0000170	N1.HOG0000170_412	complete	7.57e-06	Potra2n4c9673	Bpev01.c0639.g0015.m0001	FUN_007778-T1	PA_chr01_G002762	PS_chr04_G016676	PS_chr01_G001822	GO:0003700; GO:0005634; GO:0005667; GO:0006355; GO:0030154; GO:0043565; GO:0044212; GO:0045449	DNA; nucleus; transcription factor complex; regulation of transcription, DNA; cell differentiation; sequence; transcription regulatory region DNA binding	AT4G38620	ATMYB4; MYB4	myb domain protein 4	myb domain protein 4 myb domain protein 4	Potri.004G138000; Potri.005G112000; Potri.T144800; Potri.011G040300; Potri.004G174400; Potri.010G114000; Potri.009G134000; Potri.008G128500; Potri.006G221800
N1.HOG0000170	N1.HOG0000170_430	complete	7.57e-06	Potra2n4c9673	Bpev01.c0639.g0015.m0001	FUN_007778-T1	PA_chr01_G002762	PS_chr01_G001824	PS_chr01_G001822	GO:0003700; GO:0005634; GO:0005667; GO:0006355; GO:0030154; GO:0043565; GO:0044212; GO:0045449	DNA; nucleus; transcription factor complex; regulation of transcription, DNA; cell differentiation; sequence; transcription regulatory region DNA binding	AT4G38620	ATMYB4; MYB4	myb domain protein 4	myb domain protein 4 myb domain protein 4	Potri.004G138000; Potri.005G112000; Potri.T144800; Potri.011G040300; Potri.004G174400; Potri.010G114000; Potri.009G134000; Potri.008G128500; Potri.006G221800
N1.HOG0000170	N1.HOG0000170_442	complete	7.77167e-06	Potra2n4c9673	Bpev01.c0639.g0015.m0001	FUN_007778-T1	PA_chr01_G002762	PS_chr01_G001822	PS_chr01_G001822	GO:0003700; GO:0005634; GO:0005667; GO:0006355; GO:0030154; GO:0043565; GO:0044212; GO:0045449	DNA; nucleus; transcription factor complex; regulation of transcription, DNA; cell differentiation; sequence; transcription regulatory region DNA binding	AT4G38620	ATMYB4; MYB4	myb domain protein 4	myb domain protein 4 myb domain protein 4	Potri.004G138000; Potri.005G112000; Potri.T144800; Potri.011G040300; Potri.004G174400; Potri.010G114000; Potri.009G134000; Potri.008G128500; Potri.006G221800
N1.HOG0000170	N1.HOG0000170_664	complete	7.97168e-06	Potra2n4c9673	Bpev01.c0549.g0004.m0001	FUN_007673-T1	PA_chr01_G002762	PS_chr01_G001818	PS_chr01_G001822	GO:0003700; GO:0005634; GO:0005667; GO:0006355; GO:0030154; GO:0043565; GO:0044212; GO:0045449	DNA; nucleus; transcription factor complex; regulation of transcription, DNA; cell differentiation; sequence; transcription regulatory region DNA binding	AT4G38620	ATMYB4; MYB4	myb domain protein 4	myb domain protein 4 myb domain protein 4	Potri.004G138000; Potri.005G112000; Potri.T144800; Potri.011G040300; Potri.004G174400; Potri.010G114000; Potri.009G134000; Potri.008G128500; Potri.006G221800
N1.HOG0000170	N1.HOG0000170_676	complete	7.97168e-06	Potra2n4c9673	Bpev01.c0549.g0004.m0001	FUN_007673-T1	PA_chr01_G002762	PS_chr01_G001824	PS_chr01_G001822	GO:0003700; GO:0005634; GO:0005667; GO:0006355; GO:0030154; GO:0043565; GO:0044212; GO:0045449	DNA; nucleus; transcription factor complex; regulation of transcription, DNA; cell differentiation; sequence; transcription regulatory region DNA binding	AT4G38620	ATMYB4; MYB4	myb domain protein 4	myb domain protein 4 myb domain protein 4	Potri.004G138000; Potri.005G112000; Potri.T144800; Potri.011G040300; Potri.004G174400; Potri.010G114000; Potri.009G134000; Potri.008G128500; Potri.006G221800
N1.HOG0000170	N1.HOG0000170_670	complete	7.97173e-06	Potra2n4c9673	Bpev01.c0549.g0004.m0001	FUN_007673-T1	PA_chr01_G002762	PS_chr04_G016676	PS_chr01_G001822	GO:0003700; GO:0005634; GO:0005667; GO:0006355; GO:0030154; GO:0043565; GO:0044212; GO:0045449	DNA; nucleus; transcription factor complex; regulation of transcription, DNA; cell differentiation; sequence; transcription regulatory region DNA binding	AT4G38620	ATMYB4; MYB4	myb domain protein 4	myb domain protein 4 myb domain protein 4	Potri.004G138000; Potri.005G112000; Potri.T144800; Potri.011G040300; Potri.004G174400; Potri.010G114000; Potri.009G134000; Potri.008G128500; Potri.006G221800
N1.HOG0000170	N1.HOG0000170_610	complete	8.09267e-06	Potra2n4c9673	Bpev01.c0639.g0015.m0001	FUN_007673-T1	PA_chr01_G002762	PS_chr04_G016676	PS_chr01_G001822	GO:0003700; GO:0005634; GO:0005667; GO:0006355; GO:0030154; GO:0043565; GO:0044212; GO:0045449	DNA; nucleus; transcription factor complex; regulation of transcription, DNA; cell differentiation; sequence; transcription regulatory region DNA binding	AT4G38620	ATMYB4; MYB4	myb domain protein 4	myb domain protein 4 myb domain protein 4	Potri.004G138000; Potri.005G112000; Potri.T144800; Potri.011G040300; Potri.004G174400; Potri.010G114000; Potri.009G134000; Potri.008G128500; Potri.006G221800
N1.HOG0000170	N1.HOG0000170_604	complete	8.09267e-06	Potra2n4c9673	Bpev01.c0639.g0015.m0001	FUN_007673-T1	PA_chr01_G002762	PS_chr01_G001818	PS_chr01_G001822	GO:0003700; GO:0005634; GO:0005667; GO:0006355; GO:0030154; GO:0043565; GO:0044212; GO:0045449	DNA; nucleus; transcription factor complex; regulation of transcription, DNA; cell differentiation; sequence; transcription regulatory region DNA binding	AT4G38620	ATMYB4; MYB4	myb domain protein 4	myb domain protein 4 myb domain protein 4	Potri.004G138000; Potri.005G112000; Potri.T144800; Potri.011G040300; Potri.004G174400; Potri.010G114000; Potri.009G134000; Potri.008G128500; Potri.006G221800
N1.HOG0000170	N1.HOG0000170_616	complete	8.09267e-06	Potra2n4c9673	Bpev01.c0639.g0015.m0001	FUN_007673-T1	PA_chr01_G002762	PS_chr01_G001824	PS_chr01_G001822	GO:0003700; GO:0005634; GO:0005667; GO:0006355; GO:0030154; GO:0043565; GO:0044212; GO:0045449	DNA; nucleus; transcription factor complex; regulation of transcription, DNA; cell differentiation; sequence; transcription regulatory region DNA binding	AT4G38620	ATMYB4; MYB4	myb domain protein 4	myb domain protein 4 myb domain protein 4	Potri.004G138000; Potri.005G112000; Potri.T144800; Potri.011G040300; Potri.004G174400; Potri.010G114000; Potri.009G134000; Potri.008G128500; Potri.006G221800
N1.HOG0000170	N1.HOG0000170_622	complete	8.29433e-06	Potra2n4c9673	Bpev01.c0639.g0015.m0001	FUN_007673-T1	PA_chr01_G002762	PS_chr01_G001822	PS_chr01_G001822	GO:0003700; GO:0005634; GO:0005667; GO:0006355; GO:0030154; GO:0043565; GO:0044212; GO:0045449	DNA; nucleus; transcription factor complex; regulation of transcription, DNA; cell differentiation; sequence; transcription regulatory region DNA binding	AT4G38620	ATMYB4; MYB4	myb domain protein 4	myb domain protein 4 myb domain protein 4	Potri.004G138000; Potri.005G112000; Potri.T144800; Potri.011G040300; Potri.004G174400; Potri.010G114000; Potri.009G134000; Potri.008G128500; Potri.006G221800
N1.HOG0000170	N1.HOG0000170_472	complete	9.01417e-06	Potra2n4c9673	Bpev01.c0549.g0004.m0001	FUN_007778-T1	PA_chr01_G002762	PS_chr01_G001822	PS_chr01_G001822	GO:0003700; GO:0005634; GO:0005667; GO:0006355; GO:0030154; GO:0043565; GO:0044212; GO:0045449	DNA; nucleus; transcription factor complex; regulation of transcription, DNA; cell differentiation; sequence; transcription regulatory region DNA binding	AT4G38620	ATMYB4; MYB4	myb domain protein 4	myb domain protein 4 myb domain protein 4	Potri.004G138000; Potri.005G112000; Potri.T144800; Potri.011G040300; Potri.004G174400; Potri.010G114000; Potri.009G134000; Potri.008G128500; Potri.006G221800
N1.HOG0000170	N1.HOG0000170_682	complete	9.43335e-06	Potra2n4c9673	Bpev01.c0549.g0004.m0001	FUN_007673-T1	PA_chr01_G002762	PS_chr01_G001822	PS_chr01_G001822	GO:0003700; GO:0005634; GO:0005667; GO:0006355; GO:0030154; GO:0043565; GO:0044212; GO:0045449	DNA; nucleus; transcription factor complex; regulation of transcription, DNA; cell differentiation; sequence; transcription regulatory region DNA binding	AT4G38620	ATMYB4; MYB4	myb domain protein 4	myb domain protein 4 myb domain protein 4	Potri.004G138000; Potri.005G112000; Potri.T144800; Potri.011G040300; Potri.004G174400; Potri.010G114000; Potri.009G134000; Potri.008G128500; Potri.006G221800
N1.HOG0000170	N1.HOG0000170_481	complete	3.58953e-05	Potra2n4c9673	Bpev01.c0549.g0004.m0001	FUN_007778-T1	PA_chr01_G002759	PS_chr01_G001824	PS_chr01_G001824	GO:0003700; GO:0005634; GO:0005667; GO:0006355; GO:0030154; GO:0043565; GO:0044212; GO:0045449	DNA; nucleus; transcription factor complex; regulation of transcription, DNA; cell differentiation; sequence; transcription regulatory region DNA binding	AT4G38620	ATMYB4; MYB4	myb domain protein 4	myb domain protein 4 myb domain protein 4	Potri.004G138000; Potri.005G112000; Potri.T144800; Potri.011G040300; Potri.004G174400; Potri.010G114000; Potri.009G134000; Potri.008G128500; Potri.006G221800
N1.HOG0000170	N1.HOG0000170_475	complete	3.58954e-05	Potra2n4c9673	Bpev01.c0549.g0004.m0001	FUN_007778-T1	PA_chr01_G002759	PS_chr04_G016676	PS_chr01_G001824	GO:0003700; GO:0005634; GO:0005667; GO:0006355; GO:0030154; GO:0043565; GO:0044212; GO:0045449	DNA; nucleus; transcription factor complex; regulation of transcription, DNA; cell differentiation; sequence; transcription regulatory region DNA binding	AT4G38620	ATMYB4; MYB4	myb domain protein 4	myb domain protein 4 myb domain protein 4	Potri.004G138000; Potri.005G112000; Potri.T144800; Potri.011G040300; Potri.004G174400; Potri.010G114000; Potri.009G134000; Potri.008G128500; Potri.006G221800
N1.HOG0000170	N1.HOG0000170_415	complete	3.59128e-05	Potra2n4c9673	Bpev01.c0639.g0015.m0001	FUN_007778-T1	PA_chr01_G002759	PS_chr04_G016676	PS_chr01_G001824	GO:0003700; GO:0005634; GO:0005667; GO:0006355; GO:0030154; GO:0043565; GO:0044212; GO:0045449	DNA; nucleus; transcription factor complex; regulation of transcription, DNA; cell differentiation; sequence; transcription regulatory region DNA binding	AT4G38620	ATMYB4; MYB4	myb domain protein 4	myb domain protein 4 myb domain protein 4	Potri.004G138000; Potri.005G112000; Potri.T144800; Potri.011G040300; Potri.004G174400; Potri.010G114000; Potri.009G134000; Potri.008G128500; Potri.006G221800
N1.HOG0000170	N1.HOG0000170_433	complete	3.59128e-05	Potra2n4c9673	Bpev01.c0639.g0015.m0001	FUN_007778-T1	PA_chr01_G002759	PS_chr01_G001824	PS_chr01_G001824	GO:0003700; GO:0005634; GO:0005667; GO:0006355; GO:0030154; GO:0043565; GO:0044212; GO:0045449	DNA; nucleus; transcription factor complex; regulation of transcription, DNA; cell differentiation; sequence; transcription regulatory region DNA binding	AT4G38620	ATMYB4; MYB4	myb domain protein 4	myb domain protein 4 myb domain protein 4	Potri.004G138000; Potri.005G112000; Potri.T144800; Potri.011G040300; Potri.004G174400; Potri.010G114000; Potri.009G134000; Potri.008G128500; Potri.006G221800
N1.HOG0000170	N1.HOG0000170_685	complete	3.6003e-05	Potra2n4c9673	Bpev01.c0549.g0004.m0001	FUN_007673-T1	PA_chr01_G002759	PS_chr01_G001818	PS_chr01_G001824	GO:0003700; GO:0005634; GO:0005667; GO:0006355; GO:0030154; GO:0043565; GO:0044212; GO:0045449	DNA; nucleus; transcription factor complex; regulation of transcription, DNA; cell differentiation; sequence; transcription regulatory region DNA binding	AT4G38620	ATMYB4; MYB4	myb domain protein 4	myb domain protein 4 myb domain protein 4	Potri.004G138000; Potri.005G112000; Potri.T144800; Potri.011G040300; Potri.004G174400; Potri.010G114000; Potri.009G134000; Potri.008G128500; Potri.006G221800
N1.HOG0000170	N1.HOG0000170_697	complete	3.6003e-05	Potra2n4c9673	Bpev01.c0549.g0004.m0001	FUN_007673-T1	PA_chr01_G002759	PS_chr01_G001824	PS_chr01_G001824	GO:0003700; GO:0005634; GO:0005667; GO:0006355; GO:0030154; GO:0043565; GO:0044212; GO:0045449	DNA; nucleus; transcription factor complex; regulation of transcription, DNA; cell differentiation; sequence; transcription regulatory region DNA binding	AT4G38620	ATMYB4; MYB4	myb domain protein 4	myb domain protein 4 myb domain protein 4	Potri.004G138000; Potri.005G112000; Potri.T144800; Potri.011G040300; Potri.004G174400; Potri.010G114000; Potri.009G134000; Potri.008G128500; Potri.006G221800
N1.HOG0000170	N1.HOG0000170_691	complete	3.60031e-05	Potra2n4c9673	Bpev01.c0549.g0004.m0001	FUN_007673-T1	PA_chr01_G002759	PS_chr04_G016676	PS_chr01_G001824	GO:0003700; GO:0005634; GO:0005667; GO:0006355; GO:0030154; GO:0043565; GO:0044212; GO:0045449	DNA; nucleus; transcription factor complex; regulation of transcription, DNA; cell differentiation; sequence; transcription regulatory region DNA binding	AT4G38620	ATMYB4; MYB4	myb domain protein 4	myb domain protein 4 myb domain protein 4	Potri.004G138000; Potri.005G112000; Potri.T144800; Potri.011G040300; Potri.004G174400; Potri.010G114000; Potri.009G134000; Potri.008G128500; Potri.006G221800
N1.HOG0000170	N1.HOG0000170_479	complete	3.6113e-05	Potra2n4c9673	Bpev01.c0549.g0004.m0001	FUN_007778-T1	PA_chr04_G002634	PS_chr04_G016676	PS_chr01_G001824	GO:0003700; GO:0005634; GO:0005667; GO:0006355; GO:0030154; GO:0043565; GO:0044212; GO:0045449	DNA; nucleus; transcription factor complex; regulation of transcription, DNA; cell differentiation; sequence; transcription regulatory region DNA binding	AT4G38620	ATMYB4; MYB4	myb domain protein 4	myb domain protein 4 myb domain protein 4	Potri.004G138000; Potri.005G112000; Potri.T144800; Potri.011G040300; Potri.004G174400; Potri.010G114000; Potri.009G134000; Potri.008G128500; Potri.006G221800
N1.HOG0000170	N1.HOG0000170_445	complete	3.61145e-05	Potra2n4c9673	Bpev01.c0639.g0015.m0001	FUN_007778-T1	PA_chr01_G002759	PS_chr01_G001822	PS_chr01_G001824	GO:0003700; GO:0005634; GO:0005667; GO:0006355; GO:0030154; GO:0043565; GO:0044212; GO:0045449	DNA; nucleus; transcription factor complex; regulation of transcription, DNA; cell differentiation; sequence; transcription regulatory region DNA binding	AT4G38620	ATMYB4; MYB4	myb domain protein 4	myb domain protein 4 myb domain protein 4	Potri.004G138000; Potri.005G112000; Potri.T144800; Potri.011G040300; Potri.004G174400; Potri.010G114000; Potri.009G134000; Potri.008G128500; Potri.006G221800
N1.HOG0000170	N1.HOG0000170_631	complete	3.6124e-05	Potra2n4c9673	Bpev01.c0639.g0015.m0001	FUN_007673-T1	PA_chr01_G002759	PS_chr04_G016676	PS_chr01_G001824	GO:0003700; GO:0005634; GO:0005667; GO:0006355; GO:0030154; GO:0043565; GO:0044212; GO:0045449	DNA; nucleus; transcription factor complex; regulation of transcription, DNA; cell differentiation; sequence; transcription regulatory region DNA binding	AT4G38620	ATMYB4; MYB4	myb domain protein 4	myb domain protein 4 myb domain protein 4	Potri.004G138000; Potri.005G112000; Potri.T144800; Potri.011G040300; Potri.004G174400; Potri.010G114000; Potri.009G134000; Potri.008G128500; Potri.006G221800
N1.HOG0000170	N1.HOG0000170_625	complete	3.6124e-05	Potra2n4c9673	Bpev01.c0639.g0015.m0001	FUN_007673-T1	PA_chr01_G002759	PS_chr01_G001818	PS_chr01_G001824	GO:0003700; GO:0005634; GO:0005667; GO:0006355; GO:0030154; GO:0043565; GO:0044212; GO:0045449	DNA; nucleus; transcription factor complex; regulation of transcription, DNA; cell differentiation; sequence; transcription regulatory region DNA binding	AT4G38620	ATMYB4; MYB4	myb domain protein 4	myb domain protein 4 myb domain protein 4	Potri.004G138000; Potri.005G112000; Potri.T144800; Potri.011G040300; Potri.004G174400; Potri.010G114000; Potri.009G134000; Potri.008G128500; Potri.006G221800
N1.HOG0000170	N1.HOG0000170_637	complete	3.6124e-05	Potra2n4c9673	Bpev01.c0639.g0015.m0001	FUN_007673-T1	PA_chr01_G002759	PS_chr01_G001824	PS_chr01_G001824	GO:0003700; GO:0005634; GO:0005667; GO:0006355; GO:0030154; GO:0043565; GO:0044212; GO:0045449	DNA; nucleus; transcription factor complex; regulation of transcription, DNA; cell differentiation; sequence; transcription regulatory region DNA binding	AT4G38620	ATMYB4; MYB4	myb domain protein 4	myb domain protein 4 myb domain protein 4	Potri.004G138000; Potri.005G112000; Potri.T144800; Potri.011G040300; Potri.004G174400; Potri.010G114000; Potri.009G134000; Potri.008G128500; Potri.006G221800
N1.HOG0000170	N1.HOG0000170_419	complete	3.61305e-05	Potra2n4c9673	Bpev01.c0639.g0015.m0001	FUN_007778-T1	PA_chr04_G002634	PS_chr04_G016676	PS_chr01_G001824	GO:0003700; GO:0005634; GO:0005667; GO:0006355; GO:0030154; GO:0043565; GO:0044212; GO:0045449	DNA; nucleus; transcription factor complex; regulation of transcription, DNA; cell differentiation; sequence; transcription regulatory region DNA binding	AT4G38620	ATMYB4; MYB4	myb domain protein 4	myb domain protein 4 myb domain protein 4	Potri.004G138000; Potri.005G112000; Potri.T144800; Potri.011G040300; Potri.004G174400; Potri.010G114000; Potri.009G134000; Potri.008G128500; Potri.006G221800
N1.HOG0000170	N1.HOG0000170_695	complete	3.62207e-05	Potra2n4c9673	Bpev01.c0549.g0004.m0001	FUN_007673-T1	PA_chr04_G002634	PS_chr04_G016676	PS_chr01_G001824	GO:0003700; GO:0005634; GO:0005667; GO:0006355; GO:0030154; GO:0043565; GO:0044212; GO:0045449	DNA; nucleus; transcription factor complex; regulation of transcription, DNA; cell differentiation; sequence; transcription regulatory region DNA binding	AT4G38620	ATMYB4; MYB4	myb domain protein 4	myb domain protein 4 myb domain protein 4	Potri.004G138000; Potri.005G112000; Potri.T144800; Potri.011G040300; Potri.004G174400; Potri.010G114000; Potri.009G134000; Potri.008G128500; Potri.006G221800
N1.HOG0000170	N1.HOG0000170_218	complete	3.62328e-05	Potra2n4c9673	Bpev01.c0639.g0015.m0001	FUN_030252-T1	PA_chr04_G002634	PS_chr04_G016676	PS_chr01_G001824	GO:0003700; GO:0005634; GO:0005667; GO:0006355; GO:0030154; GO:0043565; GO:0044212; GO:0045449	DNA; nucleus; transcription factor complex; regulation of transcription, DNA; cell differentiation; sequence; transcription regulatory region DNA binding	AT4G38620	ATMYB4; MYB4	myb domain protein 4	myb domain protein 4 myb domain protein 4	Potri.004G138000; Potri.005G112000; Potri.T144800; Potri.011G040300; Potri.004G174400; Potri.010G114000; Potri.009G134000; Potri.008G128500; Potri.006G221800
N1.HOG0000170	N1.HOG0000170_258	complete	3.62329e-05	Potra2n4c9673	Bpev01.c0549.g0004.m0001	FUN_030252-T1	PA_chr04_G002634	PS_chr04_G016676	PS_chr01_G001824	GO:0003700; GO:0005634; GO:0005667; GO:0006355; GO:0030154; GO:0043565; GO:0044212; GO:0045449	DNA; nucleus; transcription factor complex; regulation of transcription, DNA; cell differentiation; sequence; transcription regulatory region DNA binding	AT4G38620	ATMYB4; MYB4	myb domain protein 4	myb domain protein 4 myb domain protein 4	Potri.004G138000; Potri.005G112000; Potri.T144800; Potri.011G040300; Potri.004G174400; Potri.010G114000; Potri.009G134000; Potri.008G128500; Potri.006G221800
N1.HOG0000170	N1.HOG0000170_689	complete	3.62743e-05	Potra2n4c9673	Bpev01.c0549.g0004.m0001	FUN_007673-T1	PA_chr04_G002634	PS_chr01_G001818	PS_chr01_G001824	GO:0003700; GO:0005634; GO:0005667; GO:0006355; GO:0030154; GO:0043565; GO:0044212; GO:0045449	DNA; nucleus; transcription factor complex; regulation of transcription, DNA; cell differentiation; sequence; transcription regulatory region DNA binding	AT4G38620	ATMYB4; MYB4	myb domain protein 4	myb domain protein 4 myb domain protein 4	Potri.004G138000; Potri.005G112000; Potri.T144800; Potri.011G040300; Potri.004G174400; Potri.010G114000; Potri.009G134000; Potri.008G128500; Potri.006G221800
N1.HOG0000170	N1.HOG0000170_217	complete	3.62865e-05	Potra2n4c9673	Bpev01.c0639.g0015.m0001	FUN_030252-T1	PA_chr04_G002634	PS_chr01_G001818	PS_chr01_G001824	GO:0003700; GO:0005634; GO:0005667; GO:0006355; GO:0030154; GO:0043565; GO:0044212; GO:0045449	DNA; nucleus; transcription factor complex; regulation of transcription, DNA; cell differentiation; sequence; transcription regulatory region DNA binding	AT4G38620	ATMYB4; MYB4	myb domain protein 4	myb domain protein 4 myb domain protein 4	Potri.004G138000; Potri.005G112000; Potri.T144800; Potri.011G040300; Potri.004G174400; Potri.010G114000; Potri.009G134000; Potri.008G128500; Potri.006G221800
N1.HOG0000170	N1.HOG0000170_257	complete	3.62865e-05	Potra2n4c9673	Bpev01.c0549.g0004.m0001	FUN_030252-T1	PA_chr04_G002634	PS_chr01_G001818	PS_chr01_G001824	GO:0003700; GO:0005634; GO:0005667; GO:0006355; GO:0030154; GO:0043565; GO:0044212; GO:0045449	DNA; nucleus; transcription factor complex; regulation of transcription, DNA; cell differentiation; sequence; transcription regulatory region DNA binding	AT4G38620	ATMYB4; MYB4	myb domain protein 4	myb domain protein 4 myb domain protein 4	Potri.004G138000; Potri.005G112000; Potri.T144800; Potri.011G040300; Potri.004G174400; Potri.010G114000; Potri.009G134000; Potri.008G128500; Potri.006G221800
N1.HOG0000170	N1.HOG0000170_643	complete	3.63257e-05	Potra2n4c9673	Bpev01.c0639.g0015.m0001	FUN_007673-T1	PA_chr01_G002759	PS_chr01_G001822	PS_chr01_G001824	GO:0003700; GO:0005634; GO:0005667; GO:0006355; GO:0030154; GO:0043565; GO:0044212; GO:0045449	DNA; nucleus; transcription factor complex; regulation of transcription, DNA; cell differentiation; sequence; transcription regulatory region DNA binding	AT4G38620	ATMYB4; MYB4	myb domain protein 4	myb domain protein 4 myb domain protein 4	Potri.004G138000; Potri.005G112000; Potri.T144800; Potri.011G040300; Potri.004G174400; Potri.010G114000; Potri.009G134000; Potri.008G128500; Potri.006G221800
N1.HOG0000170	N1.HOG0000170_635	complete	3.63417e-05	Potra2n4c9673	Bpev01.c0639.g0015.m0001	FUN_007673-T1	PA_chr04_G002634	PS_chr04_G016676	PS_chr01_G001824	GO:0003700; GO:0005634; GO:0005667; GO:0006355; GO:0030154; GO:0043565; GO:0044212; GO:0045449	DNA; nucleus; transcription factor complex; regulation of transcription, DNA; cell differentiation; sequence; transcription regulatory region DNA binding	AT4G38620	ATMYB4; MYB4	myb domain protein 4	myb domain protein 4 myb domain protein 4	Potri.004G138000; Potri.005G112000; Potri.T144800; Potri.011G040300; Potri.004G174400; Potri.010G114000; Potri.009G134000; Potri.008G128500; Potri.006G221800
N1.HOG0000170	N1.HOG0000170_629	complete	3.63953e-05	Potra2n4c9673	Bpev01.c0639.g0015.m0001	FUN_007673-T1	PA_chr04_G002634	PS_chr01_G001818	PS_chr01_G001824	GO:0003700; GO:0005634; GO:0005667; GO:0006355; GO:0030154; GO:0043565; GO:0044212; GO:0045449	DNA; nucleus; transcription factor complex; regulation of transcription, DNA; cell differentiation; sequence; transcription regulatory region DNA binding	AT4G38620	ATMYB4; MYB4	myb domain protein 4	myb domain protein 4 myb domain protein 4	Potri.004G138000; Potri.005G112000; Potri.T144800; Potri.011G040300; Potri.004G174400; Potri.010G114000; Potri.009G134000; Potri.008G128500; Potri.006G221800
N1.HOG0000170	N1.HOG0000170_482	complete	3.7323e-05	Potra2n4c9673	Bpev01.c0549.g0004.m0001	FUN_007778-T1	PA_chr01_G002769	PS_chr01_G001824	PS_chr01_G001824	GO:0003700; GO:0005634; GO:0005667; GO:0006355; GO:0030154; GO:0043565; GO:0044212; GO:0045449	DNA; nucleus; transcription factor complex; regulation of transcription, DNA; cell differentiation; sequence; transcription regulatory region DNA binding	AT4G38620	ATMYB4; MYB4	myb domain protein 4	myb domain protein 4 myb domain protein 4	Potri.004G138000; Potri.005G112000; Potri.T144800; Potri.011G040300; Potri.004G174400; Potri.010G114000; Potri.009G134000; Potri.008G128500; Potri.006G221800
N1.HOG0000170	N1.HOG0000170_476	complete	3.7323e-05	Potra2n4c9673	Bpev01.c0549.g0004.m0001	FUN_007778-T1	PA_chr01_G002769	PS_chr04_G016676	PS_chr01_G001824	GO:0003700; GO:0005634; GO:0005667; GO:0006355; GO:0030154; GO:0043565; GO:0044212; GO:0045449	DNA; nucleus; transcription factor complex; regulation of transcription, DNA; cell differentiation; sequence; transcription regulatory region DNA binding	AT4G38620	ATMYB4; MYB4	myb domain protein 4	myb domain protein 4 myb domain protein 4	Potri.004G138000; Potri.005G112000; Potri.T144800; Potri.011G040300; Potri.004G174400; Potri.010G114000; Potri.009G134000; Potri.008G128500; Potri.006G221800
N1.HOG0000170	N1.HOG0000170_416	complete	3.73405e-05	Potra2n4c9673	Bpev01.c0639.g0015.m0001	FUN_007778-T1	PA_chr01_G002769	PS_chr04_G016676	PS_chr01_G001824	GO:0003700; GO:0005634; GO:0005667; GO:0006355; GO:0030154; GO:0043565; GO:0044212; GO:0045449	DNA; nucleus; transcription factor complex; regulation of transcription, DNA; cell differentiation; sequence; transcription regulatory region DNA binding	AT4G38620	ATMYB4; MYB4	myb domain protein 4	myb domain protein 4 myb domain protein 4	Potri.004G138000; Potri.005G112000; Potri.T144800; Potri.011G040300; Potri.004G174400; Potri.010G114000; Potri.009G134000; Potri.008G128500; Potri.006G221800
N1.HOG0000170	N1.HOG0000170_434	complete	3.73405e-05	Potra2n4c9673	Bpev01.c0639.g0015.m0001	FUN_007778-T1	PA_chr01_G002769	PS_chr01_G001824	PS_chr01_G001824	GO:0003700; GO:0005634; GO:0005667; GO:0006355; GO:0030154; GO:0043565; GO:0044212; GO:0045449	DNA; nucleus; transcription factor complex; regulation of transcription, DNA; cell differentiation; sequence; transcription regulatory region DNA binding	AT4G38620	ATMYB4; MYB4	myb domain protein 4	myb domain protein 4 myb domain protein 4	Potri.004G138000; Potri.005G112000; Potri.T144800; Potri.011G040300; Potri.004G174400; Potri.010G114000; Potri.009G134000; Potri.008G128500; Potri.006G221800
N1.HOG0000170	N1.HOG0000170_487	complete	3.7357e-05	Potra2n4c9673	Bpev01.c0549.g0004.m0001	FUN_007778-T1	PA_chr01_G002759	PS_chr01_G001822	PS_chr01_G001824	GO:0003700; GO:0005634; GO:0005667; GO:0006355; GO:0030154; GO:0043565; GO:0044212; GO:0045449	DNA; nucleus; transcription factor complex; regulation of transcription, DNA; cell differentiation; sequence; transcription regulatory region DNA binding	AT4G38620	ATMYB4; MYB4	myb domain protein 4	myb domain protein 4 myb domain protein 4	Potri.004G138000; Potri.005G112000; Potri.T144800; Potri.011G040300; Potri.004G174400; Potri.010G114000; Potri.009G134000; Potri.008G128500; Potri.006G221800
N1.HOG0000170	N1.HOG0000170_698	complete	3.74307e-05	Potra2n4c9673	Bpev01.c0549.g0004.m0001	FUN_007673-T1	PA_chr01_G002769	PS_chr01_G001824	PS_chr01_G001824	GO:0003700; GO:0005634; GO:0005667; GO:0006355; GO:0030154; GO:0043565; GO:0044212; GO:0045449	DNA; nucleus; transcription factor complex; regulation of transcription, DNA; cell differentiation; sequence; transcription regulatory region DNA binding	AT4G38620	ATMYB4; MYB4	myb domain protein 4	myb domain protein 4 myb domain protein 4	Potri.004G138000; Potri.005G112000; Potri.T144800; Potri.011G040300; Potri.004G174400; Potri.010G114000; Potri.009G134000; Potri.008G128500; Potri.006G221800
N1.HOG0000170	N1.HOG0000170_686	complete	3.74307e-05	Potra2n4c9673	Bpev01.c0549.g0004.m0001	FUN_007673-T1	PA_chr01_G002769	PS_chr01_G001818	PS_chr01_G001824	GO:0003700; GO:0005634; GO:0005667; GO:0006355; GO:0030154; GO:0043565; GO:0044212; GO:0045449	DNA; nucleus; transcription factor complex; regulation of transcription, DNA; cell differentiation; sequence; transcription regulatory region DNA binding	AT4G38620	ATMYB4; MYB4	myb domain protein 4	myb domain protein 4 myb domain protein 4	Potri.004G138000; Potri.005G112000; Potri.T144800; Potri.011G040300; Potri.004G174400; Potri.010G114000; Potri.009G134000; Potri.008G128500; Potri.006G221800
N1.HOG0000170	N1.HOG0000170_692	complete	3.74307e-05	Potra2n4c9673	Bpev01.c0549.g0004.m0001	FUN_007673-T1	PA_chr01_G002769	PS_chr04_G016676	PS_chr01_G001824	GO:0003700; GO:0005634; GO:0005667; GO:0006355; GO:0030154; GO:0043565; GO:0044212; GO:0045449	DNA; nucleus; transcription factor complex; regulation of transcription, DNA; cell differentiation; sequence; transcription regulatory region DNA binding	AT4G38620	ATMYB4; MYB4	myb domain protein 4	myb domain protein 4 myb domain protein 4	Potri.004G138000; Potri.005G112000; Potri.T144800; Potri.011G040300; Potri.004G174400; Potri.010G114000; Potri.009G134000; Potri.008G128500; Potri.006G221800
N1.HOG0000170	N1.HOG0000170_266	complete	3.74428e-05	Potra2n4c9673	Bpev01.c0639.g0015.m0001	FUN_030252-T1	PA_chr01_G002769	PS_chr04_G016676	PS_chr01_G001824	GO:0003700; GO:0005634; GO:0005667; GO:0006355; GO:0030154; GO:0043565; GO:0044212; GO:0045449	DNA; nucleus; transcription factor complex; regulation of transcription, DNA; cell differentiation; sequence; transcription regulatory region DNA binding	AT4G38620	ATMYB4; MYB4	myb domain protein 4	myb domain protein 4 myb domain protein 4	Potri.004G138000; Potri.005G112000; Potri.T144800; Potri.011G040300; Potri.004G174400; Potri.010G114000; Potri.009G134000; Potri.008G128500; Potri.006G221800
N1.HOG0000170	N1.HOG0000170_301	complete	3.74428e-05	Potra2n4c9673	Bpev01.c0549.g0004.m0001	FUN_030252-T1	PA_chr01_G002769	PS_chr01_G001824	PS_chr01_G001824	GO:0003700; GO:0005634; GO:0005667; GO:0006355; GO:0030154; GO:0043565; GO:0044212; GO:0045449	DNA; nucleus; transcription factor complex; regulation of transcription, DNA; cell differentiation; sequence; transcription regulatory region DNA binding	AT4G38620	ATMYB4; MYB4	myb domain protein 4	myb domain protein 4 myb domain protein 4	Potri.004G138000; Potri.005G112000; Potri.T144800; Potri.011G040300; Potri.004G174400; Potri.010G114000; Potri.009G134000; Potri.008G128500; Potri.006G221800
N1.HOG0000170	N1.HOG0000170_265	complete	3.74428e-05	Potra2n4c9673	Bpev01.c0639.g0015.m0001	FUN_030252-T1	PA_chr01_G002769	PS_chr01_G001818	PS_chr01_G001824	GO:0003700; GO:0005634; GO:0005667; GO:0006355; GO:0030154; GO:0043565; GO:0044212; GO:0045449	DNA; nucleus; transcription factor complex; regulation of transcription, DNA; cell differentiation; sequence; transcription regulatory region DNA binding	AT4G38620	ATMYB4; MYB4	myb domain protein 4	myb domain protein 4 myb domain protein 4	Potri.004G138000; Potri.005G112000; Potri.T144800; Potri.011G040300; Potri.004G174400; Potri.010G114000; Potri.009G134000; Potri.008G128500; Potri.006G221800
N1.HOG0000170	N1.HOG0000170_299	complete	3.74428e-05	Potra2n4c9673	Bpev01.c0549.g0004.m0001	FUN_030252-T1	PA_chr01_G002769	PS_chr01_G001818	PS_chr01_G001824	GO:0003700; GO:0005634; GO:0005667; GO:0006355; GO:0030154; GO:0043565; GO:0044212; GO:0045449	DNA; nucleus; transcription factor complex; regulation of transcription, DNA; cell differentiation; sequence; transcription regulatory region DNA binding	AT4G38620	ATMYB4; MYB4	myb domain protein 4	myb domain protein 4 myb domain protein 4	Potri.004G138000; Potri.005G112000; Potri.T144800; Potri.011G040300; Potri.004G174400; Potri.010G114000; Potri.009G134000; Potri.008G128500; Potri.006G221800
N1.HOG0000170	N1.HOG0000170_267	complete	3.74428e-05	Potra2n4c9673	Bpev01.c0639.g0015.m0001	FUN_030252-T1	PA_chr01_G002769	PS_chr01_G001824	PS_chr01_G001824	GO:0003700; GO:0005634; GO:0005667; GO:0006355; GO:0030154; GO:0043565; GO:0044212; GO:0045449	DNA; nucleus; transcription factor complex; regulation of transcription, DNA; cell differentiation; sequence; transcription regulatory region DNA binding	AT4G38620	ATMYB4; MYB4	myb domain protein 4	myb domain protein 4 myb domain protein 4	Potri.004G138000; Potri.005G112000; Potri.T144800; Potri.011G040300; Potri.004G174400; Potri.010G114000; Potri.009G134000; Potri.008G128500; Potri.006G221800
N1.HOG0000170	N1.HOG0000170_300	complete	3.74429e-05	Potra2n4c9673	Bpev01.c0549.g0004.m0001	FUN_030252-T1	PA_chr01_G002769	PS_chr04_G016676	PS_chr01_G001824	GO:0003700; GO:0005634; GO:0005667; GO:0006355; GO:0030154; GO:0043565; GO:0044212; GO:0045449	DNA; nucleus; transcription factor complex; regulation of transcription, DNA; cell differentiation; sequence; transcription regulatory region DNA binding	AT4G38620	ATMYB4; MYB4	myb domain protein 4	myb domain protein 4 myb domain protein 4	Potri.004G138000; Potri.005G112000; Potri.T144800; Potri.011G040300; Potri.004G174400; Potri.010G114000; Potri.009G134000; Potri.008G128500; Potri.006G221800
N1.HOG0000170	N1.HOG0000170_703	complete	3.74647e-05	Potra2n4c9673	Bpev01.c0549.g0004.m0001	FUN_007673-T1	PA_chr01_G002759	PS_chr01_G001822	PS_chr01_G001824	GO:0003700; GO:0005634; GO:0005667; GO:0006355; GO:0030154; GO:0043565; GO:0044212; GO:0045449	DNA; nucleus; transcription factor complex; regulation of transcription, DNA; cell differentiation; sequence; transcription regulatory region DNA binding	AT4G38620	ATMYB4; MYB4	myb domain protein 4	myb domain protein 4 myb domain protein 4	Potri.004G138000; Potri.005G112000; Potri.T144800; Potri.011G040300; Potri.004G174400; Potri.010G114000; Potri.009G134000; Potri.008G128500; Potri.006G221800
N1.HOG0000170	N1.HOG0000170_446	complete	3.75422e-05	Potra2n4c9673	Bpev01.c0639.g0015.m0001	FUN_007778-T1	PA_chr01_G002769	PS_chr01_G001822	PS_chr01_G001824	GO:0003700; GO:0005634; GO:0005667; GO:0006355; GO:0030154; GO:0043565; GO:0044212; GO:0045449	DNA; nucleus; transcription factor complex; regulation of transcription, DNA; cell differentiation; sequence; transcription regulatory region DNA binding	AT4G38620	ATMYB4; MYB4	myb domain protein 4	myb domain protein 4 myb domain protein 4	Potri.004G138000; Potri.005G112000; Potri.T144800; Potri.011G040300; Potri.004G174400; Potri.010G114000; Potri.009G134000; Potri.008G128500; Potri.006G221800
N1.HOG0000170	N1.HOG0000170_632	complete	3.75517e-05	Potra2n4c9673	Bpev01.c0639.g0015.m0001	FUN_007673-T1	PA_chr01_G002769	PS_chr04_G016676	PS_chr01_G001824	GO:0003700; GO:0005634; GO:0005667; GO:0006355; GO:0030154; GO:0043565; GO:0044212; GO:0045449	DNA; nucleus; transcription factor complex; regulation of transcription, DNA; cell differentiation; sequence; transcription regulatory region DNA binding	AT4G38620	ATMYB4; MYB4	myb domain protein 4	myb domain protein 4 myb domain protein 4	Potri.004G138000; Potri.005G112000; Potri.T144800; Potri.011G040300; Potri.004G174400; Potri.010G114000; Potri.009G134000; Potri.008G128500; Potri.006G221800
N1.HOG0000170	N1.HOG0000170_626	complete	3.75517e-05	Potra2n4c9673	Bpev01.c0639.g0015.m0001	FUN_007673-T1	PA_chr01_G002769	PS_chr01_G001818	PS_chr01_G001824	GO:0003700; GO:0005634; GO:0005667; GO:0006355; GO:0030154; GO:0043565; GO:0044212; GO:0045449	DNA; nucleus; transcription factor complex; regulation of transcription, DNA; cell differentiation; sequence; transcription regulatory region DNA binding	AT4G38620	ATMYB4; MYB4	myb domain protein 4	myb domain protein 4 myb domain protein 4	Potri.004G138000; Potri.005G112000; Potri.T144800; Potri.011G040300; Potri.004G174400; Potri.010G114000; Potri.009G134000; Potri.008G128500; Potri.006G221800
N1.HOG0000170	N1.HOG0000170_638	complete	3.75517e-05	Potra2n4c9673	Bpev01.c0639.g0015.m0001	FUN_007673-T1	PA_chr01_G002769	PS_chr01_G001824	PS_chr01_G001824	GO:0003700; GO:0005634; GO:0005667; GO:0006355; GO:0030154; GO:0043565; GO:0044212; GO:0045449	DNA; nucleus; transcription factor complex; regulation of transcription, DNA; cell differentiation; sequence; transcription regulatory region DNA binding	AT4G38620	ATMYB4; MYB4	myb domain protein 4	myb domain protein 4 myb domain protein 4	Potri.004G138000; Potri.005G112000; Potri.T144800; Potri.011G040300; Potri.004G174400; Potri.010G114000; Potri.009G134000; Potri.008G128500; Potri.006G221800
N1.HOG0000170	N1.HOG0000170_268	complete	3.76445e-05	Potra2n4c9673	Bpev01.c0639.g0015.m0001	FUN_030252-T1	PA_chr01_G002769	PS_chr01_G001822	PS_chr01_G001824	GO:0003700; GO:0005634; GO:0005667; GO:0006355; GO:0030154; GO:0043565; GO:0044212; GO:0045449	DNA; nucleus; transcription factor complex; regulation of transcription, DNA; cell differentiation; sequence; transcription regulatory region DNA binding	AT4G38620	ATMYB4; MYB4	myb domain protein 4	myb domain protein 4 myb domain protein 4	Potri.004G138000; Potri.005G112000; Potri.T144800; Potri.011G040300; Potri.004G174400; Potri.010G114000; Potri.009G134000; Potri.008G128500; Potri.006G221800
N1.HOG0000170	N1.HOG0000170_644	complete	3.77533e-05	Potra2n4c9673	Bpev01.c0639.g0015.m0001	FUN_007673-T1	PA_chr01_G002769	PS_chr01_G001822	PS_chr01_G001824	GO:0003700; GO:0005634; GO:0005667; GO:0006355; GO:0030154; GO:0043565; GO:0044212; GO:0045449	DNA; nucleus; transcription factor complex; regulation of transcription, DNA; cell differentiation; sequence; transcription regulatory region DNA binding	AT4G38620	ATMYB4; MYB4	myb domain protein 4	myb domain protein 4 myb domain protein 4	Potri.004G138000; Potri.005G112000; Potri.T144800; Potri.011G040300; Potri.004G174400; Potri.010G114000; Potri.009G134000; Potri.008G128500; Potri.006G221800
N1.HOG0000170	N1.HOG0000170_488	complete	3.87847e-05	Potra2n4c9673	Bpev01.c0549.g0004.m0001	FUN_007778-T1	PA_chr01_G002769	PS_chr01_G001822	PS_chr01_G001824	GO:0003700; GO:0005634; GO:0005667; GO:0006355; GO:0030154; GO:0043565; GO:0044212; GO:0045449	DNA; nucleus; transcription factor complex; regulation of transcription, DNA; cell differentiation; sequence; transcription regulatory region DNA binding	AT4G38620	ATMYB4; MYB4	myb domain protein 4	myb domain protein 4 myb domain protein 4	Potri.004G138000; Potri.005G112000; Potri.T144800; Potri.011G040300; Potri.004G174400; Potri.010G114000; Potri.009G134000; Potri.008G128500; Potri.006G221800
N1.HOG0000170	N1.HOG0000170_704	complete	3.88923e-05	Potra2n4c9673	Bpev01.c0549.g0004.m0001	FUN_007673-T1	PA_chr01_G002769	PS_chr01_G001822	PS_chr01_G001824	GO:0003700; GO:0005634; GO:0005667; GO:0006355; GO:0030154; GO:0043565; GO:0044212; GO:0045449	DNA; nucleus; transcription factor complex; regulation of transcription, DNA; cell differentiation; sequence; transcription regulatory region DNA binding	AT4G38620	ATMYB4; MYB4	myb domain protein 4	myb domain protein 4 myb domain protein 4	Potri.004G138000; Potri.005G112000; Potri.T144800; Potri.011G040300; Potri.004G174400; Potri.010G114000; Potri.009G134000; Potri.008G128500; Potri.006G221800
N1.HOG0000170	N1.HOG0000170_302	complete	3.89045e-05	Potra2n4c9673	Bpev01.c0549.g0004.m0001	FUN_030252-T1	PA_chr01_G002769	PS_chr01_G001822	PS_chr01_G001824	GO:0003700; GO:0005634; GO:0005667; GO:0006355; GO:0030154; GO:0043565; GO:0044212; GO:0045449	DNA; nucleus; transcription factor complex; regulation of transcription, DNA; cell differentiation; sequence; transcription regulatory region DNA binding	AT4G38620	ATMYB4; MYB4	myb domain protein 4	myb domain protein 4 myb domain protein 4	Potri.004G138000; Potri.005G112000; Potri.T144800; Potri.011G040300; Potri.004G174400; Potri.010G114000; Potri.009G134000; Potri.008G128500; Potri.006G221800
N1.HOG0000170	N1.HOG0000170_477	complete	4.01297e-05	Potra2n4c9673	Bpev01.c0549.g0004.m0001	FUN_007778-T1	PA_chr01_G002758	PS_chr04_G016676	PS_chr01_G001824	GO:0003700; GO:0005634; GO:0005667; GO:0006355; GO:0030154; GO:0043565; GO:0044212; GO:0045449	DNA; nucleus; transcription factor complex; regulation of transcription, DNA; cell differentiation; sequence; transcription regulatory region DNA binding	AT4G38620	ATMYB4; MYB4	myb domain protein 4	myb domain protein 4 myb domain protein 4	Potri.004G138000; Potri.005G112000; Potri.T144800; Potri.011G040300; Potri.004G174400; Potri.010G114000; Potri.009G134000; Potri.008G128500; Potri.006G221800
N1.HOG0000170	N1.HOG0000170_483	complete	4.013e-05	Potra2n4c9673	Bpev01.c0549.g0004.m0001	FUN_007778-T1	PA_chr01_G002758	PS_chr01_G001824	PS_chr01_G001824	GO:0003700; GO:0005634; GO:0005667; GO:0006355; GO:0030154; GO:0043565; GO:0044212; GO:0045449	DNA; nucleus; transcription factor complex; regulation of transcription, DNA; cell differentiation; sequence; transcription regulatory region DNA binding	AT4G38620	ATMYB4; MYB4	myb domain protein 4	myb domain protein 4 myb domain protein 4	Potri.004G138000; Potri.005G112000; Potri.T144800; Potri.011G040300; Potri.004G174400; Potri.010G114000; Potri.009G134000; Potri.008G128500; Potri.006G221800
N1.HOG0000170	N1.HOG0000170_417	complete	4.01472e-05	Potra2n4c9673	Bpev01.c0639.g0015.m0001	FUN_007778-T1	PA_chr01_G002758	PS_chr04_G016676	PS_chr01_G001824	GO:0003700; GO:0005634; GO:0005667; GO:0006355; GO:0030154; GO:0043565; GO:0044212; GO:0045449	DNA; nucleus; transcription factor complex; regulation of transcription, DNA; cell differentiation; sequence; transcription regulatory region DNA binding	AT4G38620	ATMYB4; MYB4	myb domain protein 4	myb domain protein 4 myb domain protein 4	Potri.004G138000; Potri.005G112000; Potri.T144800; Potri.011G040300; Potri.004G174400; Potri.010G114000; Potri.009G134000; Potri.008G128500; Potri.006G221800
N1.HOG0000170	N1.HOG0000170_435	complete	4.01475e-05	Potra2n4c9673	Bpev01.c0639.g0015.m0001	FUN_007778-T1	PA_chr01_G002758	PS_chr01_G001824	PS_chr01_G001824	GO:0003700; GO:0005634; GO:0005667; GO:0006355; GO:0030154; GO:0043565; GO:0044212; GO:0045449	DNA; nucleus; transcription factor complex; regulation of transcription, DNA; cell differentiation; sequence; transcription regulatory region DNA binding	AT4G38620	ATMYB4; MYB4	myb domain protein 4	myb domain protein 4 myb domain protein 4	Potri.004G138000; Potri.005G112000; Potri.T144800; Potri.011G040300; Potri.004G174400; Potri.010G114000; Potri.009G134000; Potri.008G128500; Potri.006G221800
N1.HOG0000170	N1.HOG0000170_693	complete	4.02374e-05	Potra2n4c9673	Bpev01.c0549.g0004.m0001	FUN_007673-T1	PA_chr01_G002758	PS_chr04_G016676	PS_chr01_G001824	GO:0003700; GO:0005634; GO:0005667; GO:0006355; GO:0030154; GO:0043565; GO:0044212; GO:0045449	DNA; nucleus; transcription factor complex; regulation of transcription, DNA; cell differentiation; sequence; transcription regulatory region DNA binding	AT4G38620	ATMYB4; MYB4	myb domain protein 4	myb domain protein 4 myb domain protein 4	Potri.004G138000; Potri.005G112000; Potri.T144800; Potri.011G040300; Potri.004G174400; Potri.010G114000; Potri.009G134000; Potri.008G128500; Potri.006G221800
N1.HOG0000170	N1.HOG0000170_699	complete	4.02376e-05	Potra2n4c9673	Bpev01.c0549.g0004.m0001	FUN_007673-T1	PA_chr01_G002758	PS_chr01_G001824	PS_chr01_G001824	GO:0003700; GO:0005634; GO:0005667; GO:0006355; GO:0030154; GO:0043565; GO:0044212; GO:0045449	DNA; nucleus; transcription factor complex; regulation of transcription, DNA; cell differentiation; sequence; transcription regulatory region DNA binding	AT4G38620	ATMYB4; MYB4	myb domain protein 4	myb domain protein 4 myb domain protein 4	Potri.004G138000; Potri.005G112000; Potri.T144800; Potri.011G040300; Potri.004G174400; Potri.010G114000; Potri.009G134000; Potri.008G128500; Potri.006G221800
N1.HOG0000170	N1.HOG0000170_687	complete	4.02381e-05	Potra2n4c9673	Bpev01.c0549.g0004.m0001	FUN_007673-T1	PA_chr01_G002758	PS_chr01_G001818	PS_chr01_G001824	GO:0003700; GO:0005634; GO:0005667; GO:0006355; GO:0030154; GO:0043565; GO:0044212; GO:0045449	DNA; nucleus; transcription factor complex; regulation of transcription, DNA; cell differentiation; sequence; transcription regulatory region DNA binding	AT4G38620	ATMYB4; MYB4	myb domain protein 4	myb domain protein 4 myb domain protein 4	Potri.004G138000; Potri.005G112000; Potri.T144800; Potri.011G040300; Potri.004G174400; Potri.010G114000; Potri.009G134000; Potri.008G128500; Potri.006G221800
N1.HOG0000170	N1.HOG0000170_447	complete	4.03488e-05	Potra2n4c9673	Bpev01.c0639.g0015.m0001	FUN_007778-T1	PA_chr01_G002758	PS_chr01_G001822	PS_chr01_G001824	GO:0003700; GO:0005634; GO:0005667; GO:0006355; GO:0030154; GO:0043565; GO:0044212; GO:0045449	DNA; nucleus; transcription factor complex; regulation of transcription, DNA; cell differentiation; sequence; transcription regulatory region DNA binding	AT4G38620	ATMYB4; MYB4	myb domain protein 4	myb domain protein 4 myb domain protein 4	Potri.004G138000; Potri.005G112000; Potri.T144800; Potri.011G040300; Potri.004G174400; Potri.010G114000; Potri.009G134000; Potri.008G128500; Potri.006G221800
N1.HOG0000170	N1.HOG0000170_633	complete	4.03583e-05	Potra2n4c9673	Bpev01.c0639.g0015.m0001	FUN_007673-T1	PA_chr01_G002758	PS_chr04_G016676	PS_chr01_G001824	GO:0003700; GO:0005634; GO:0005667; GO:0006355; GO:0030154; GO:0043565; GO:0044212; GO:0045449	DNA; nucleus; transcription factor complex; regulation of transcription, DNA; cell differentiation; sequence; transcription regulatory region DNA binding	AT4G38620	ATMYB4; MYB4	myb domain protein 4	myb domain protein 4 myb domain protein 4	Potri.004G138000; Potri.005G112000; Potri.T144800; Potri.011G040300; Potri.004G174400; Potri.010G114000; Potri.009G134000; Potri.008G128500; Potri.006G221800
N1.HOG0000170	N1.HOG0000170_639	complete	4.03586e-05	Potra2n4c9673	Bpev01.c0639.g0015.m0001	FUN_007673-T1	PA_chr01_G002758	PS_chr01_G001824	PS_chr01_G001824	GO:0003700; GO:0005634; GO:0005667; GO:0006355; GO:0030154; GO:0043565; GO:0044212; GO:0045449	DNA; nucleus; transcription factor complex; regulation of transcription, DNA; cell differentiation; sequence; transcription regulatory region DNA binding	AT4G38620	ATMYB4; MYB4	myb domain protein 4	myb domain protein 4 myb domain protein 4	Potri.004G138000; Potri.005G112000; Potri.T144800; Potri.011G040300; Potri.004G174400; Potri.010G114000; Potri.009G134000; Potri.008G128500; Potri.006G221800
N1.HOG0000170	N1.HOG0000170_627	complete	4.03591e-05	Potra2n4c9673	Bpev01.c0639.g0015.m0001	FUN_007673-T1	PA_chr01_G002758	PS_chr01_G001818	PS_chr01_G001824	GO:0003700; GO:0005634; GO:0005667; GO:0006355; GO:0030154; GO:0043565; GO:0044212; GO:0045449	DNA; nucleus; transcription factor complex; regulation of transcription, DNA; cell differentiation; sequence; transcription regulatory region DNA binding	AT4G38620	ATMYB4; MYB4	myb domain protein 4	myb domain protein 4 myb domain protein 4	Potri.004G138000; Potri.005G112000; Potri.T144800; Potri.011G040300; Potri.004G174400; Potri.010G114000; Potri.009G134000; Potri.008G128500; Potri.006G221800
N1.HOG0000170	N1.HOG0000170_645	complete	4.056e-05	Potra2n4c9673	Bpev01.c0639.g0015.m0001	FUN_007673-T1	PA_chr01_G002758	PS_chr01_G001822	PS_chr01_G001824	GO:0003700; GO:0005634; GO:0005667; GO:0006355; GO:0030154; GO:0043565; GO:0044212; GO:0045449	DNA; nucleus; transcription factor complex; regulation of transcription, DNA; cell differentiation; sequence; transcription regulatory region DNA binding	AT4G38620	ATMYB4; MYB4	myb domain protein 4	myb domain protein 4 myb domain protein 4	Potri.004G138000; Potri.005G112000; Potri.T144800; Potri.011G040300; Potri.004G174400; Potri.010G114000; Potri.009G134000; Potri.008G128500; Potri.006G221800
N1.HOG0000170	N1.HOG0000170_489	complete	4.15913e-05	Potra2n4c9673	Bpev01.c0549.g0004.m0001	FUN_007778-T1	PA_chr01_G002758	PS_chr01_G001822	PS_chr01_G001824	GO:0003700; GO:0005634; GO:0005667; GO:0006355; GO:0030154; GO:0043565; GO:0044212; GO:0045449	DNA; nucleus; transcription factor complex; regulation of transcription, DNA; cell differentiation; sequence; transcription regulatory region DNA binding	AT4G38620	ATMYB4; MYB4	myb domain protein 4	myb domain protein 4 myb domain protein 4	Potri.004G138000; Potri.005G112000; Potri.T144800; Potri.011G040300; Potri.004G174400; Potri.010G114000; Potri.009G134000; Potri.008G128500; Potri.006G221800
N1.HOG0000170	N1.HOG0000170_705	complete	4.1699e-05	Potra2n4c9673	Bpev01.c0549.g0004.m0001	FUN_007673-T1	PA_chr01_G002758	PS_chr01_G001822	PS_chr01_G001824	GO:0003700; GO:0005634; GO:0005667; GO:0006355; GO:0030154; GO:0043565; GO:0044212; GO:0045449	DNA; nucleus; transcription factor complex; regulation of transcription, DNA; cell differentiation; sequence; transcription regulatory region DNA binding	AT4G38620	ATMYB4; MYB4	myb domain protein 4	myb domain protein 4 myb domain protein 4	Potri.004G138000; Potri.005G112000; Potri.T144800; Potri.011G040300; Potri.004G174400; Potri.010G114000; Potri.009G134000; Potri.008G128500; Potri.006G221800
N1.HOG0000170	N1.HOG0000170_484	complete	4.2063e-05	Potra2n4c9673	Bpev01.c0549.g0004.m0001	FUN_007778-T1	PA_chr01_G002762	PS_chr01_G001824	PS_chr01_G001824	GO:0003700; GO:0005634; GO:0005667; GO:0006355; GO:0030154; GO:0043565; GO:0044212; GO:0045449	DNA; nucleus; transcription factor complex; regulation of transcription, DNA; cell differentiation; sequence; transcription regulatory region DNA binding	AT4G38620	ATMYB4; MYB4	myb domain protein 4	myb domain protein 4 myb domain protein 4	Potri.004G138000; Potri.005G112000; Potri.T144800; Potri.011G040300; Potri.004G174400; Potri.010G114000; Potri.009G134000; Potri.008G128500; Potri.006G221800
N1.HOG0000170	N1.HOG0000170_478	complete	4.2063e-05	Potra2n4c9673	Bpev01.c0549.g0004.m0001	FUN_007778-T1	PA_chr01_G002762	PS_chr04_G016676	PS_chr01_G001824	GO:0003700; GO:0005634; GO:0005667; GO:0006355; GO:0030154; GO:0043565; GO:0044212; GO:0045449	DNA; nucleus; transcription factor complex; regulation of transcription, DNA; cell differentiation; sequence; transcription regulatory region DNA binding	AT4G38620	ATMYB4; MYB4	myb domain protein 4	myb domain protein 4 myb domain protein 4	Potri.004G138000; Potri.005G112000; Potri.T144800; Potri.011G040300; Potri.004G174400; Potri.010G114000; Potri.009G134000; Potri.008G128500; Potri.006G221800
N1.HOG0000170	N1.HOG0000170_418	complete	4.20805e-05	Potra2n4c9673	Bpev01.c0639.g0015.m0001	FUN_007778-T1	PA_chr01_G002762	PS_chr04_G016676	PS_chr01_G001824	GO:0003700; GO:0005634; GO:0005667; GO:0006355; GO:0030154; GO:0043565; GO:0044212; GO:0045449	DNA; nucleus; transcription factor complex; regulation of transcription, DNA; cell differentiation; sequence; transcription regulatory region DNA binding	AT4G38620	ATMYB4; MYB4	myb domain protein 4	myb domain protein 4 myb domain protein 4	Potri.004G138000; Potri.005G112000; Potri.T144800; Potri.011G040300; Potri.004G174400; Potri.010G114000; Potri.009G134000; Potri.008G128500; Potri.006G221800
N1.HOG0000170	N1.HOG0000170_436	complete	4.20805e-05	Potra2n4c9673	Bpev01.c0639.g0015.m0001	FUN_007778-T1	PA_chr01_G002762	PS_chr01_G001824	PS_chr01_G001824	GO:0003700; GO:0005634; GO:0005667; GO:0006355; GO:0030154; GO:0043565; GO:0044212; GO:0045449	DNA; nucleus; transcription factor complex; regulation of transcription, DNA; cell differentiation; sequence; transcription regulatory region DNA binding	AT4G38620	ATMYB4; MYB4	myb domain protein 4	myb domain protein 4 myb domain protein 4	Potri.004G138000; Potri.005G112000; Potri.T144800; Potri.011G040300; Potri.004G174400; Potri.010G114000; Potri.009G134000; Potri.008G128500; Potri.006G221800
N1.HOG0000170	N1.HOG0000170_688	complete	4.21707e-05	Potra2n4c9673	Bpev01.c0549.g0004.m0001	FUN_007673-T1	PA_chr01_G002762	PS_chr01_G001818	PS_chr01_G001824	GO:0003700; GO:0005634; GO:0005667; GO:0006355; GO:0030154; GO:0043565; GO:0044212; GO:0045449	DNA; nucleus; transcription factor complex; regulation of transcription, DNA; cell differentiation; sequence; transcription regulatory region DNA binding	AT4G38620	ATMYB4; MYB4	myb domain protein 4	myb domain protein 4 myb domain protein 4	Potri.004G138000; Potri.005G112000; Potri.T144800; Potri.011G040300; Potri.004G174400; Potri.010G114000; Potri.009G134000; Potri.008G128500; Potri.006G221800
N1.HOG0000170	N1.HOG0000170_700	complete	4.21707e-05	Potra2n4c9673	Bpev01.c0549.g0004.m0001	FUN_007673-T1	PA_chr01_G002762	PS_chr01_G001824	PS_chr01_G001824	GO:0003700; GO:0005634; GO:0005667; GO:0006355; GO:0030154; GO:0043565; GO:0044212; GO:0045449	DNA; nucleus; transcription factor complex; regulation of transcription, DNA; cell differentiation; sequence; transcription regulatory region DNA binding	AT4G38620	ATMYB4; MYB4	myb domain protein 4	myb domain protein 4 myb domain protein 4	Potri.004G138000; Potri.005G112000; Potri.T144800; Potri.011G040300; Potri.004G174400; Potri.010G114000; Potri.009G134000; Potri.008G128500; Potri.006G221800
N1.HOG0000170	N1.HOG0000170_694	complete	4.21707e-05	Potra2n4c9673	Bpev01.c0549.g0004.m0001	FUN_007673-T1	PA_chr01_G002762	PS_chr04_G016676	PS_chr01_G001824	GO:0003700; GO:0005634; GO:0005667; GO:0006355; GO:0030154; GO:0043565; GO:0044212; GO:0045449	DNA; nucleus; transcription factor complex; regulation of transcription, DNA; cell differentiation; sequence; transcription regulatory region DNA binding	AT4G38620	ATMYB4; MYB4	myb domain protein 4	myb domain protein 4 myb domain protein 4	Potri.004G138000; Potri.005G112000; Potri.T144800; Potri.011G040300; Potri.004G174400; Potri.010G114000; Potri.009G134000; Potri.008G128500; Potri.006G221800
N1.HOG0000170	N1.HOG0000170_448	complete	4.22822e-05	Potra2n4c9673	Bpev01.c0639.g0015.m0001	FUN_007778-T1	PA_chr01_G002762	PS_chr01_G001822	PS_chr01_G001824	GO:0003700; GO:0005634; GO:0005667; GO:0006355; GO:0030154; GO:0043565; GO:0044212; GO:0045449	DNA; nucleus; transcription factor complex; regulation of transcription, DNA; cell differentiation; sequence; transcription regulatory region DNA binding	AT4G38620	ATMYB4; MYB4	myb domain protein 4	myb domain protein 4 myb domain protein 4	Potri.004G138000; Potri.005G112000; Potri.T144800; Potri.011G040300; Potri.004G174400; Potri.010G114000; Potri.009G134000; Potri.008G128500; Potri.006G221800
N1.HOG0000170	N1.HOG0000170_634	complete	4.22917e-05	Potra2n4c9673	Bpev01.c0639.g0015.m0001	FUN_007673-T1	PA_chr01_G002762	PS_chr04_G016676	PS_chr01_G001824	GO:0003700; GO:0005634; GO:0005667; GO:0006355; GO:0030154; GO:0043565; GO:0044212; GO:0045449	DNA; nucleus; transcription factor complex; regulation of transcription, DNA; cell differentiation; sequence; transcription regulatory region DNA binding	AT4G38620	ATMYB4; MYB4	myb domain protein 4	myb domain protein 4 myb domain protein 4	Potri.004G138000; Potri.005G112000; Potri.T144800; Potri.011G040300; Potri.004G174400; Potri.010G114000; Potri.009G134000; Potri.008G128500; Potri.006G221800
N1.HOG0000170	N1.HOG0000170_628	complete	4.22917e-05	Potra2n4c9673	Bpev01.c0639.g0015.m0001	FUN_007673-T1	PA_chr01_G002762	PS_chr01_G001818	PS_chr01_G001824	GO:0003700; GO:0005634; GO:0005667; GO:0006355; GO:0030154; GO:0043565; GO:0044212; GO:0045449	DNA; nucleus; transcription factor complex; regulation of transcription, DNA; cell differentiation; sequence; transcription regulatory region DNA binding	AT4G38620	ATMYB4; MYB4	myb domain protein 4	myb domain protein 4 myb domain protein 4	Potri.004G138000; Potri.005G112000; Potri.T144800; Potri.011G040300; Potri.004G174400; Potri.010G114000; Potri.009G134000; Potri.008G128500; Potri.006G221800
N1.HOG0000170	N1.HOG0000170_640	complete	4.22917e-05	Potra2n4c9673	Bpev01.c0639.g0015.m0001	FUN_007673-T1	PA_chr01_G002762	PS_chr01_G001824	PS_chr01_G001824	GO:0003700; GO:0005634; GO:0005667; GO:0006355; GO:0030154; GO:0043565; GO:0044212; GO:0045449	DNA; nucleus; transcription factor complex; regulation of transcription, DNA; cell differentiation; sequence; transcription regulatory region DNA binding	AT4G38620	ATMYB4; MYB4	myb domain protein 4	myb domain protein 4 myb domain protein 4	Potri.004G138000; Potri.005G112000; Potri.T144800; Potri.011G040300; Potri.004G174400; Potri.010G114000; Potri.009G134000; Potri.008G128500; Potri.006G221800
N1.HOG0000170	N1.HOG0000170_646	complete	4.24933e-05	Potra2n4c9673	Bpev01.c0639.g0015.m0001	FUN_007673-T1	PA_chr01_G002762	PS_chr01_G001822	PS_chr01_G001824	GO:0003700; GO:0005634; GO:0005667; GO:0006355; GO:0030154; GO:0043565; GO:0044212; GO:0045449	DNA; nucleus; transcription factor complex; regulation of transcription, DNA; cell differentiation; sequence; transcription regulatory region DNA binding	AT4G38620	ATMYB4; MYB4	myb domain protein 4	myb domain protein 4 myb domain protein 4	Potri.004G138000; Potri.005G112000; Potri.T144800; Potri.011G040300; Potri.004G174400; Potri.010G114000; Potri.009G134000; Potri.008G128500; Potri.006G221800
N1.HOG0000170	N1.HOG0000170_490	complete	4.35247e-05	Potra2n4c9673	Bpev01.c0549.g0004.m0001	FUN_007778-T1	PA_chr01_G002762	PS_chr01_G001822	PS_chr01_G001824	GO:0003700; GO:0005634; GO:0005667; GO:0006355; GO:0030154; GO:0043565; GO:0044212; GO:0045449	DNA; nucleus; transcription factor complex; regulation of transcription, DNA; cell differentiation; sequence; transcription regulatory region DNA binding	AT4G38620	ATMYB4; MYB4	myb domain protein 4	myb domain protein 4 myb domain protein 4	Potri.004G138000; Potri.005G112000; Potri.T144800; Potri.011G040300; Potri.004G174400; Potri.010G114000; Potri.009G134000; Potri.008G128500; Potri.006G221800
N1.HOG0000170	N1.HOG0000170_706	complete	4.36323e-05	Potra2n4c9673	Bpev01.c0549.g0004.m0001	FUN_007673-T1	PA_chr01_G002762	PS_chr01_G001822	PS_chr01_G001824	GO:0003700; GO:0005634; GO:0005667; GO:0006355; GO:0030154; GO:0043565; GO:0044212; GO:0045449	DNA; nucleus; transcription factor complex; regulation of transcription, DNA; cell differentiation; sequence; transcription regulatory region DNA binding	AT4G38620	ATMYB4; MYB4	myb domain protein 4	myb domain protein 4 myb domain protein 4	Potri.004G138000; Potri.005G112000; Potri.T144800; Potri.011G040300; Potri.004G174400; Potri.010G114000; Potri.009G134000; Potri.008G128500; Potri.006G221800
N1.HOG0000170	N1.HOG0000170_304	complete	0.000109601	Potra2n4c9673	Bpev01.c0549.g0004.m0001	FUN_030252-T1	PA_chr01_G002769	PS_chr01_G001824	PS_chr01_G001817	GO:0003700; GO:0005634; GO:0005667; GO:0006355; GO:0030154; GO:0043565; GO:0044212; GO:0045449	DNA; nucleus; transcription factor complex; regulation of transcription, DNA; cell differentiation; sequence; transcription regulatory region DNA binding	AT4G38620	ATMYB4; MYB4	myb domain protein 4	myb domain protein 4 myb domain protein 4	Potri.004G138000; Potri.005G112000; Potri.T144800; Potri.011G040300; Potri.004G174400; Potri.010G114000; Potri.009G134000; Potri.008G128500; Potri.006G221800
N1.HOG0000170	N1.HOG0000170_271	complete	0.000109601	Potra2n4c9673	Bpev01.c0639.g0015.m0001	FUN_030252-T1	PA_chr01_G002769	PS_chr01_G001818	PS_chr01_G001817	GO:0003700; GO:0005634; GO:0005667; GO:0006355; GO:0030154; GO:0043565; GO:0044212; GO:0045449	DNA; nucleus; transcription factor complex; regulation of transcription, DNA; cell differentiation; sequence; transcription regulatory region DNA binding	AT4G38620	ATMYB4; MYB4	myb domain protein 4	myb domain protein 4 myb domain protein 4	Potri.004G138000; Potri.005G112000; Potri.T144800; Potri.011G040300; Potri.004G174400; Potri.010G114000; Potri.009G134000; Potri.008G128500; Potri.006G221800
N1.HOG0000170	N1.HOG0000170_303	complete	0.000109601	Potra2n4c9673	Bpev01.c0549.g0004.m0001	FUN_030252-T1	PA_chr01_G002769	PS_chr01_G001818	PS_chr01_G001817	GO:0003700; GO:0005634; GO:0005667; GO:0006355; GO:0030154; GO:0043565; GO:0044212; GO:0045449	DNA; nucleus; transcription factor complex; regulation of transcription, DNA; cell differentiation; sequence; transcription regulatory region DNA binding	AT4G38620	ATMYB4; MYB4	myb domain protein 4	myb domain protein 4 myb domain protein 4	Potri.004G138000; Potri.005G112000; Potri.T144800; Potri.011G040300; Potri.004G174400; Potri.010G114000; Potri.009G134000; Potri.008G128500; Potri.006G221800
N1.HOG0000170	N1.HOG0000170_272	complete	0.000109601	Potra2n4c9673	Bpev01.c0639.g0015.m0001	FUN_030252-T1	PA_chr01_G002769	PS_chr01_G001824	PS_chr01_G001817	GO:0003700; GO:0005634; GO:0005667; GO:0006355; GO:0030154; GO:0043565; GO:0044212; GO:0045449	DNA; nucleus; transcription factor complex; regulation of transcription, DNA; cell differentiation; sequence; transcription regulatory region DNA binding	AT4G38620	ATMYB4; MYB4	myb domain protein 4	myb domain protein 4 myb domain protein 4	Potri.004G138000; Potri.005G112000; Potri.T144800; Potri.011G040300; Potri.004G174400; Potri.010G114000; Potri.009G134000; Potri.008G128500; Potri.006G221800
N1.HOG0000170	N1.HOG0000170_273	complete	0.000109803	Potra2n4c9673	Bpev01.c0639.g0015.m0001	FUN_030252-T1	PA_chr01_G002769	PS_chr01_G001822	PS_chr01_G001817	GO:0003700; GO:0005634; GO:0005667; GO:0006355; GO:0030154; GO:0043565; GO:0044212; GO:0045449	DNA; nucleus; transcription factor complex; regulation of transcription, DNA; cell differentiation; sequence; transcription regulatory region DNA binding	AT4G38620	ATMYB4; MYB4	myb domain protein 4	myb domain protein 4 myb domain protein 4	Potri.004G138000; Potri.005G112000; Potri.T144800; Potri.011G040300; Potri.004G174400; Potri.010G114000; Potri.009G134000; Potri.008G128500; Potri.006G221800
N1.HOG0000170	N1.HOG0000170_305	complete	0.000111063	Potra2n4c9673	Bpev01.c0549.g0004.m0001	FUN_030252-T1	PA_chr01_G002769	PS_chr01_G001822	PS_chr01_G001817	GO:0003700; GO:0005634; GO:0005667; GO:0006355; GO:0030154; GO:0043565; GO:0044212; GO:0045449	DNA; nucleus; transcription factor complex; regulation of transcription, DNA; cell differentiation; sequence; transcription regulatory region DNA binding	AT4G38620	ATMYB4; MYB4	myb domain protein 4	myb domain protein 4 myb domain protein 4	Potri.004G138000; Potri.005G112000; Potri.T144800; Potri.011G040300; Potri.004G174400; Potri.010G114000; Potri.009G134000; Potri.008G128500; Potri.006G221800
N1.HOG0000170	N1.HOG0000170_421	complete	0.000194518	Potra2n4c9673	Bpev01.c0639.g0015.m0001	FUN_007778-T1	PA_chr01_G002759	PS_chr04_G016676	PS_chr04_G016676	GO:0003700; GO:0005634; GO:0005667; GO:0006355; GO:0030154; GO:0043565; GO:0044212; GO:0045449	DNA; nucleus; transcription factor complex; regulation of transcription, DNA; cell differentiation; sequence; transcription regulatory region DNA binding	AT4G38620	ATMYB4; MYB4	myb domain protein 4	myb domain protein 4 myb domain protein 4	Potri.004G138000; Potri.005G112000; Potri.T144800; Potri.011G040300; Potri.004G174400; Potri.010G114000; Potri.009G134000; Potri.008G128500; Potri.006G221800
N1.HOG0000170	N1.HOG0000170_451	complete	0.00019472	Potra2n4c9673	Bpev01.c0639.g0015.m0001	FUN_007778-T1	PA_chr01_G002759	PS_chr01_G001822	PS_chr04_G016676	GO:0003700; GO:0005634; GO:0005667; GO:0006355; GO:0030154; GO:0043565; GO:0044212; GO:0045449	DNA; nucleus; transcription factor complex; regulation of transcription, DNA; cell differentiation; sequence; transcription regulatory region DNA binding	AT4G38620	ATMYB4; MYB4	myb domain protein 4	myb domain protein 4 myb domain protein 4	Potri.004G138000; Potri.005G112000; Potri.T144800; Potri.011G040300; Potri.004G174400; Potri.010G114000; Potri.009G134000; Potri.008G128500; Potri.006G221800
N1.HOG0000170	N1.HOG0000170_425	complete	0.000194736	Potra2n4c9673	Bpev01.c0639.g0015.m0001	FUN_007778-T1	PA_chr04_G002634	PS_chr04_G016676	PS_chr04_G016676	GO:0003700; GO:0005634; GO:0005667; GO:0006355; GO:0030154; GO:0043565; GO:0044212; GO:0045449	DNA; nucleus; transcription factor complex; regulation of transcription, DNA; cell differentiation; sequence; transcription regulatory region DNA binding	AT4G38620	ATMYB4; MYB4	myb domain protein 4	myb domain protein 4 myb domain protein 4	Potri.004G138000; Potri.005G112000; Potri.T144800; Potri.011G040300; Potri.004G174400; Potri.010G114000; Potri.009G134000; Potri.008G128500; Potri.006G221800
N1.HOG0000170	N1.HOG0000170_422	complete	0.000195946	Potra2n4c9673	Bpev01.c0639.g0015.m0001	FUN_007778-T1	PA_chr01_G002769	PS_chr04_G016676	PS_chr04_G016676	GO:0003700; GO:0005634; GO:0005667; GO:0006355; GO:0030154; GO:0043565; GO:0044212; GO:0045449	DNA; nucleus; transcription factor complex; regulation of transcription, DNA; cell differentiation; sequence; transcription regulatory region DNA binding	AT4G38620	ATMYB4; MYB4	myb domain protein 4	myb domain protein 4 myb domain protein 4	Potri.004G138000; Potri.005G112000; Potri.T144800; Potri.011G040300; Potri.004G174400; Potri.010G114000; Potri.009G134000; Potri.008G128500; Potri.006G221800
N1.HOG0000170	N1.HOG0000170_452	complete	0.000196148	Potra2n4c9673	Bpev01.c0639.g0015.m0001	FUN_007778-T1	PA_chr01_G002769	PS_chr01_G001822	PS_chr04_G016676	GO:0003700; GO:0005634; GO:0005667; GO:0006355; GO:0030154; GO:0043565; GO:0044212; GO:0045449	DNA; nucleus; transcription factor complex; regulation of transcription, DNA; cell differentiation; sequence; transcription regulatory region DNA binding	AT4G38620	ATMYB4; MYB4	myb domain protein 4	myb domain protein 4 myb domain protein 4	Potri.004G138000; Potri.005G112000; Potri.T144800; Potri.011G040300; Potri.004G174400; Potri.010G114000; Potri.009G134000; Potri.008G128500; Potri.006G221800
N1.HOG0000170	N1.HOG0000170_423	complete	0.000198753	Potra2n4c9673	Bpev01.c0639.g0015.m0001	FUN_007778-T1	PA_chr01_G002758	PS_chr04_G016676	PS_chr04_G016676	GO:0003700; GO:0005634; GO:0005667; GO:0006355; GO:0030154; GO:0043565; GO:0044212; GO:0045449	DNA; nucleus; transcription factor complex; regulation of transcription, DNA; cell differentiation; sequence; transcription regulatory region DNA binding	AT4G38620	ATMYB4; MYB4	myb domain protein 4	myb domain protein 4 myb domain protein 4	Potri.004G138000; Potri.005G112000; Potri.T144800; Potri.011G040300; Potri.004G174400; Potri.010G114000; Potri.009G134000; Potri.008G128500; Potri.006G221800
N1.HOG0000170	N1.HOG0000170_453	complete	0.000198954	Potra2n4c9673	Bpev01.c0639.g0015.m0001	FUN_007778-T1	PA_chr01_G002758	PS_chr01_G001822	PS_chr04_G016676	GO:0003700; GO:0005634; GO:0005667; GO:0006355; GO:0030154; GO:0043565; GO:0044212; GO:0045449	DNA; nucleus; transcription factor complex; regulation of transcription, DNA; cell differentiation; sequence; transcription regulatory region DNA binding	AT4G38620	ATMYB4; MYB4	myb domain protein 4	myb domain protein 4 myb domain protein 4	Potri.004G138000; Potri.005G112000; Potri.T144800; Potri.011G040300; Potri.004G174400; Potri.010G114000; Potri.009G134000; Potri.008G128500; Potri.006G221800
N1.HOG0000170	N1.HOG0000170_424	complete	0.000200686	Potra2n4c9673	Bpev01.c0639.g0015.m0001	FUN_007778-T1	PA_chr01_G002762	PS_chr04_G016676	PS_chr04_G016676	GO:0003700; GO:0005634; GO:0005667; GO:0006355; GO:0030154; GO:0043565; GO:0044212; GO:0045449	DNA; nucleus; transcription factor complex; regulation of transcription, DNA; cell differentiation; sequence; transcription regulatory region DNA binding	AT4G38620	ATMYB4; MYB4	myb domain protein 4	myb domain protein 4 myb domain protein 4	Potri.004G138000; Potri.005G112000; Potri.T144800; Potri.011G040300; Potri.004G174400; Potri.010G114000; Potri.009G134000; Potri.008G128500; Potri.006G221800
N1.HOG0000170	N1.HOG0000170_454	complete	0.000200887	Potra2n4c9673	Bpev01.c0639.g0015.m0001	FUN_007778-T1	PA_chr01_G002762	PS_chr01_G001822	PS_chr04_G016676	GO:0003700; GO:0005634; GO:0005667; GO:0006355; GO:0030154; GO:0043565; GO:0044212; GO:0045449	DNA; nucleus; transcription factor complex; regulation of transcription, DNA; cell differentiation; sequence; transcription regulatory region DNA binding	AT4G38620	ATMYB4; MYB4	myb domain protein 4	myb domain protein 4 myb domain protein 4	Potri.004G138000; Potri.005G112000; Potri.T144800; Potri.011G040300; Potri.004G174400; Potri.010G114000; Potri.009G134000; Potri.008G128500; Potri.006G221800
N1.HOG0000170	N1.HOG0000170_649	complete	0.000202287	Potra2n4c9673	Bpev01.c0639.g0015.m0001	FUN_007673-T1	PA_chr01_G002759	PS_chr04_G016676	PS_chr04_G016676	GO:0003700; GO:0005634; GO:0005667; GO:0006355; GO:0030154; GO:0043565; GO:0044212; GO:0045449	DNA; nucleus; transcription factor complex; regulation of transcription, DNA; cell differentiation; sequence; transcription regulatory region DNA binding	AT4G38620	ATMYB4; MYB4	myb domain protein 4	myb domain protein 4 myb domain protein 4	Potri.004G138000; Potri.005G112000; Potri.T144800; Potri.011G040300; Potri.004G174400; Potri.010G114000; Potri.009G134000; Potri.008G128500; Potri.006G221800
N1.HOG0000170	N1.HOG0000170_655	complete	0.000202488	Potra2n4c9673	Bpev01.c0639.g0015.m0001	FUN_007673-T1	PA_chr01_G002759	PS_chr01_G001822	PS_chr04_G016676	GO:0003700; GO:0005634; GO:0005667; GO:0006355; GO:0030154; GO:0043565; GO:0044212; GO:0045449	DNA; nucleus; transcription factor complex; regulation of transcription, DNA; cell differentiation; sequence; transcription regulatory region DNA binding	AT4G38620	ATMYB4; MYB4	myb domain protein 4	myb domain protein 4 myb domain protein 4	Potri.004G138000; Potri.005G112000; Potri.T144800; Potri.011G040300; Potri.004G174400; Potri.010G114000; Potri.009G134000; Potri.008G128500; Potri.006G221800
N1.HOG0000170	N1.HOG0000170_653	complete	0.000202504	Potra2n4c9673	Bpev01.c0639.g0015.m0001	FUN_007673-T1	PA_chr04_G002634	PS_chr04_G016676	PS_chr04_G016676	GO:0003700; GO:0005634; GO:0005667; GO:0006355; GO:0030154; GO:0043565; GO:0044212; GO:0045449	DNA; nucleus; transcription factor complex; regulation of transcription, DNA; cell differentiation; sequence; transcription regulatory region DNA binding	AT4G38620	ATMYB4; MYB4	myb domain protein 4	myb domain protein 4 myb domain protein 4	Potri.004G138000; Potri.005G112000; Potri.T144800; Potri.011G040300; Potri.004G174400; Potri.010G114000; Potri.009G134000; Potri.008G128500; Potri.006G221800
N1.HOG0000170	N1.HOG0000170_650	complete	0.000203714	Potra2n4c9673	Bpev01.c0639.g0015.m0001	FUN_007673-T1	PA_chr01_G002769	PS_chr04_G016676	PS_chr04_G016676	GO:0003700; GO:0005634; GO:0005667; GO:0006355; GO:0030154; GO:0043565; GO:0044212; GO:0045449	DNA; nucleus; transcription factor complex; regulation of transcription, DNA; cell differentiation; sequence; transcription regulatory region DNA binding	AT4G38620	ATMYB4; MYB4	myb domain protein 4	myb domain protein 4 myb domain protein 4	Potri.004G138000; Potri.005G112000; Potri.T144800; Potri.011G040300; Potri.004G174400; Potri.010G114000; Potri.009G134000; Potri.008G128500; Potri.006G221800
N1.HOG0000170	N1.HOG0000170_656	complete	0.000203916	Potra2n4c9673	Bpev01.c0639.g0015.m0001	FUN_007673-T1	PA_chr01_G002769	PS_chr01_G001822	PS_chr04_G016676	GO:0003700; GO:0005634; GO:0005667; GO:0006355; GO:0030154; GO:0043565; GO:0044212; GO:0045449	DNA; nucleus; transcription factor complex; regulation of transcription, DNA; cell differentiation; sequence; transcription regulatory region DNA binding	AT4G38620	ATMYB4; MYB4	myb domain protein 4	myb domain protein 4 myb domain protein 4	Potri.004G138000; Potri.005G112000; Potri.T144800; Potri.011G040300; Potri.004G174400; Potri.010G114000; Potri.009G134000; Potri.008G128500; Potri.006G221800
N1.HOG0000170	N1.HOG0000170_651	complete	0.000206521	Potra2n4c9673	Bpev01.c0639.g0015.m0001	FUN_007673-T1	PA_chr01_G002758	PS_chr04_G016676	PS_chr04_G016676	GO:0003700; GO:0005634; GO:0005667; GO:0006355; GO:0030154; GO:0043565; GO:0044212; GO:0045449	DNA; nucleus; transcription factor complex; regulation of transcription, DNA; cell differentiation; sequence; transcription regulatory region DNA binding	AT4G38620	ATMYB4; MYB4	myb domain protein 4	myb domain protein 4 myb domain protein 4	Potri.004G138000; Potri.005G112000; Potri.T144800; Potri.011G040300; Potri.004G174400; Potri.010G114000; Potri.009G134000; Potri.008G128500; Potri.006G221800
N1.HOG0000170	N1.HOG0000170_657	complete	0.000206723	Potra2n4c9673	Bpev01.c0639.g0015.m0001	FUN_007673-T1	PA_chr01_G002758	PS_chr01_G001822	PS_chr04_G016676	GO:0003700; GO:0005634; GO:0005667; GO:0006355; GO:0030154; GO:0043565; GO:0044212; GO:0045449	DNA; nucleus; transcription factor complex; regulation of transcription, DNA; cell differentiation; sequence; transcription regulatory region DNA binding	AT4G38620	ATMYB4; MYB4	myb domain protein 4	myb domain protein 4 myb domain protein 4	Potri.004G138000; Potri.005G112000; Potri.T144800; Potri.011G040300; Potri.004G174400; Potri.010G114000; Potri.009G134000; Potri.008G128500; Potri.006G221800
N1.HOG0000170	N1.HOG0000170_652	complete	0.000208454	Potra2n4c9673	Bpev01.c0639.g0015.m0001	FUN_007673-T1	PA_chr01_G002762	PS_chr04_G016676	PS_chr04_G016676	GO:0003700; GO:0005634; GO:0005667; GO:0006355; GO:0030154; GO:0043565; GO:0044212; GO:0045449	DNA; nucleus; transcription factor complex; regulation of transcription, DNA; cell differentiation; sequence; transcription regulatory region DNA binding	AT4G38620	ATMYB4; MYB4	myb domain protein 4	myb domain protein 4 myb domain protein 4	Potri.004G138000; Potri.005G112000; Potri.T144800; Potri.011G040300; Potri.004G174400; Potri.010G114000; Potri.009G134000; Potri.008G128500; Potri.006G221800
N1.HOG0000170	N1.HOG0000170_658	complete	0.000208656	Potra2n4c9673	Bpev01.c0639.g0015.m0001	FUN_007673-T1	PA_chr01_G002762	PS_chr01_G001822	PS_chr04_G016676	GO:0003700; GO:0005634; GO:0005667; GO:0006355; GO:0030154; GO:0043565; GO:0044212; GO:0045449	DNA; nucleus; transcription factor complex; regulation of transcription, DNA; cell differentiation; sequence; transcription regulatory region DNA binding	AT4G38620	ATMYB4; MYB4	myb domain protein 4	myb domain protein 4 myb domain protein 4	Potri.004G138000; Potri.005G112000; Potri.T144800; Potri.011G040300; Potri.004G174400; Potri.010G114000; Potri.009G134000; Potri.008G128500; Potri.006G221800
N1.HOG0000170	N1.HOG0000170_234	complete	0.000776684	Potra2n19c34420	Bpev01.c0639.g0015.m0001	FUN_030252-T1	PA_chr04_G002634	PS_chr04_G016676	PS_chr01_G001822	GO:0003700; GO:0005634; GO:0005667; GO:0006355; GO:0030154; GO:0043565; GO:0044212; GO:0045449	DNA; nucleus; transcription factor complex; regulation of transcription, DNA; cell differentiation; sequence; transcription regulatory region DNA binding	AT4G38620	ATMYB4; MYB4	myb domain protein 4	myb domain protein 4 myb domain protein 4	Potri.004G138000; Potri.005G112000; Potri.T144800; Potri.011G040300; Potri.004G174400; Potri.010G114000; Potri.009G134000; Potri.008G128500; Potri.006G221800
N1.HOG0000170	N1.HOG0000170_244	complete	0.000776684	Potra2n19c34420	Bpev01.c0549.g0004.m0001	FUN_030252-T1	PA_chr04_G002634	PS_chr04_G016676	PS_chr01_G001822	GO:0003700; GO:0005634; GO:0005667; GO:0006355; GO:0030154; GO:0043565; GO:0044212; GO:0045449	DNA; nucleus; transcription factor complex; regulation of transcription, DNA; cell differentiation; sequence; transcription regulatory region DNA binding	AT4G38620	ATMYB4; MYB4	myb domain protein 4	myb domain protein 4 myb domain protein 4	Potri.004G138000; Potri.005G112000; Potri.T144800; Potri.011G040300; Potri.004G174400; Potri.010G114000; Potri.009G134000; Potri.008G128500; Potri.006G221800
N1.HOG0000170	N1.HOG0000170_233	complete	0.000776738	Potra2n19c34420	Bpev01.c0639.g0015.m0001	FUN_030252-T1	PA_chr04_G002634	PS_chr01_G001818	PS_chr01_G001822	GO:0003700; GO:0005634; GO:0005667; GO:0006355; GO:0030154; GO:0043565; GO:0044212; GO:0045449	DNA; nucleus; transcription factor complex; regulation of transcription, DNA; cell differentiation; sequence; transcription regulatory region DNA binding	AT4G38620	ATMYB4; MYB4	myb domain protein 4	myb domain protein 4 myb domain protein 4	Potri.004G138000; Potri.005G112000; Potri.T144800; Potri.011G040300; Potri.004G174400; Potri.010G114000; Potri.009G134000; Potri.008G128500; Potri.006G221800
N1.HOG0000170	N1.HOG0000170_243	complete	0.000776738	Potra2n19c34420	Bpev01.c0549.g0004.m0001	FUN_030252-T1	PA_chr04_G002634	PS_chr01_G001818	PS_chr01_G001822	GO:0003700; GO:0005634; GO:0005667; GO:0006355; GO:0030154; GO:0043565; GO:0044212; GO:0045449	DNA; nucleus; transcription factor complex; regulation of transcription, DNA; cell differentiation; sequence; transcription regulatory region DNA binding	AT4G38620	ATMYB4; MYB4	myb domain protein 4	myb domain protein 4 myb domain protein 4	Potri.004G138000; Potri.005G112000; Potri.T144800; Potri.011G040300; Potri.004G174400; Potri.010G114000; Potri.009G134000; Potri.008G128500; Potri.006G221800
N1.HOG0000170	N1.HOG0000170_216	complete	0.000823362	Potra2n4c9673	Bpev01.c0639.g0015.m0001	FUN_030252-T1	PA_chr04_G002634	PS_chr01_G001822	PS_chr01_G001822	GO:0003700; GO:0005634; GO:0005667; GO:0006355; GO:0030154; GO:0043565; GO:0044212; GO:0045449	DNA; nucleus; transcription factor complex; regulation of transcription, DNA; cell differentiation; sequence; transcription regulatory region DNA binding	AT4G38620	ATMYB4; MYB4	myb domain protein 4	myb domain protein 4 myb domain protein 4	Potri.004G138000; Potri.005G112000; Potri.T144800; Potri.011G040300; Potri.004G174400; Potri.010G114000; Potri.009G134000; Potri.008G128500; Potri.006G221800
N1.HOG0000170	N1.HOG0000170_443	complete	0.000823488	Potra2n4c9673	Bpev01.c0639.g0015.m0001	FUN_007778-T1	PA_chr04_G002634	PS_chr01_G001822	PS_chr01_G001822	GO:0003700; GO:0005634; GO:0005667; GO:0006355; GO:0030154; GO:0043565; GO:0044212; GO:0045449	DNA; nucleus; transcription factor complex; regulation of transcription, DNA; cell differentiation; sequence; transcription regulatory region DNA binding	AT4G38620	ATMYB4; MYB4	myb domain protein 4	myb domain protein 4 myb domain protein 4	Potri.004G138000; Potri.005G112000; Potri.T144800; Potri.011G040300; Potri.004G174400; Potri.010G114000; Potri.009G134000; Potri.008G128500; Potri.006G221800
N1.HOG0000170	N1.HOG0000170_623	complete	0.000824011	Potra2n4c9673	Bpev01.c0639.g0015.m0001	FUN_007673-T1	PA_chr04_G002634	PS_chr01_G001822	PS_chr01_G001822	GO:0003700; GO:0005634; GO:0005667; GO:0006355; GO:0030154; GO:0043565; GO:0044212; GO:0045449	DNA; nucleus; transcription factor complex; regulation of transcription, DNA; cell differentiation; sequence; transcription regulatory region DNA binding	AT4G38620	ATMYB4; MYB4	myb domain protein 4	myb domain protein 4 myb domain protein 4	Potri.004G138000; Potri.005G112000; Potri.T144800; Potri.011G040300; Potri.004G174400; Potri.010G114000; Potri.009G134000; Potri.008G128500; Potri.006G221800
N1.HOG0000170	N1.HOG0000170_249	complete	0.000824622	Potra2n4c9673	Bpev01.c0549.g0004.m0001	FUN_030252-T1	PA_chr04_G002634	PS_chr01_G001822	PS_chr01_G001822	GO:0003700; GO:0005634; GO:0005667; GO:0006355; GO:0030154; GO:0043565; GO:0044212; GO:0045449	DNA; nucleus; transcription factor complex; regulation of transcription, DNA; cell differentiation; sequence; transcription regulatory region DNA binding	AT4G38620	ATMYB4; MYB4	myb domain protein 4	myb domain protein 4 myb domain protein 4	Potri.004G138000; Potri.005G112000; Potri.T144800; Potri.011G040300; Potri.004G174400; Potri.010G114000; Potri.009G134000; Potri.008G128500; Potri.006G221800
N1.HOG0000170	N1.HOG0000170_473	complete	0.000824731	Potra2n4c9673	Bpev01.c0549.g0004.m0001	FUN_007778-T1	PA_chr04_G002634	PS_chr01_G001822	PS_chr01_G001822	GO:0003700; GO:0005634; GO:0005667; GO:0006355; GO:0030154; GO:0043565; GO:0044212; GO:0045449	DNA; nucleus; transcription factor complex; regulation of transcription, DNA; cell differentiation; sequence; transcription regulatory region DNA binding	AT4G38620	ATMYB4; MYB4	myb domain protein 4	myb domain protein 4 myb domain protein 4	Potri.004G138000; Potri.005G112000; Potri.T144800; Potri.011G040300; Potri.004G174400; Potri.010G114000; Potri.009G134000; Potri.008G128500; Potri.006G221800
N1.HOG0000170	N1.HOG0000170_683	complete	0.00082515	Potra2n4c9673	Bpev01.c0549.g0004.m0001	FUN_007673-T1	PA_chr04_G002634	PS_chr01_G001822	PS_chr01_G001822	GO:0003700; GO:0005634; GO:0005667; GO:0006355; GO:0030154; GO:0043565; GO:0044212; GO:0045449	DNA; nucleus; transcription factor complex; regulation of transcription, DNA; cell differentiation; sequence; transcription regulatory region DNA binding	AT4G38620	ATMYB4; MYB4	myb domain protein 4	myb domain protein 4 myb domain protein 4	Potri.004G138000; Potri.005G112000; Potri.T144800; Potri.011G040300; Potri.004G174400; Potri.010G114000; Potri.009G134000; Potri.008G128500; Potri.006G221800
N1.HOG0000170	N1.HOG0000170_449	complete	0.000857999	Potra2n4c9673	Bpev01.c0639.g0015.m0001	FUN_007778-T1	PA_chr04_G002634	PS_chr01_G001822	PS_chr01_G001824	GO:0003700; GO:0005634; GO:0005667; GO:0006355; GO:0030154; GO:0043565; GO:0044212; GO:0045449	DNA; nucleus; transcription factor complex; regulation of transcription, DNA; cell differentiation; sequence; transcription regulatory region DNA binding	AT4G38620	ATMYB4; MYB4	myb domain protein 4	myb domain protein 4 myb domain protein 4	Potri.004G138000; Potri.005G112000; Potri.T144800; Potri.011G040300; Potri.004G174400; Potri.010G114000; Potri.009G134000; Potri.008G128500; Potri.006G221800
N1.HOG0000170	N1.HOG0000170_220	complete	0.000858101	Potra2n4c9673	Bpev01.c0639.g0015.m0001	FUN_030252-T1	PA_chr04_G002634	PS_chr01_G001822	PS_chr01_G001824	GO:0003700; GO:0005634; GO:0005667; GO:0006355; GO:0030154; GO:0043565; GO:0044212; GO:0045449	DNA; nucleus; transcription factor complex; regulation of transcription, DNA; cell differentiation; sequence; transcription regulatory region DNA binding	AT4G38620	ATMYB4; MYB4	myb domain protein 4	myb domain protein 4 myb domain protein 4	Potri.004G138000; Potri.005G112000; Potri.T144800; Potri.011G040300; Potri.004G174400; Potri.010G114000; Potri.009G134000; Potri.008G128500; Potri.006G221800
N1.HOG0000170	N1.HOG0000170_647	complete	0.00085821	Potra2n4c9673	Bpev01.c0639.g0015.m0001	FUN_007673-T1	PA_chr04_G002634	PS_chr01_G001822	PS_chr01_G001824	GO:0003700; GO:0005634; GO:0005667; GO:0006355; GO:0030154; GO:0043565; GO:0044212; GO:0045449	DNA; nucleus; transcription factor complex; regulation of transcription, DNA; cell differentiation; sequence; transcription regulatory region DNA binding	AT4G38620	ATMYB4; MYB4	myb domain protein 4	myb domain protein 4 myb domain protein 4	Potri.004G138000; Potri.005G112000; Potri.T144800; Potri.011G040300; Potri.004G174400; Potri.010G114000; Potri.009G134000; Potri.008G128500; Potri.006G221800
N1.HOG0000170	N1.HOG0000170_491	complete	0.000859241	Potra2n4c9673	Bpev01.c0549.g0004.m0001	FUN_007778-T1	PA_chr04_G002634	PS_chr01_G001822	PS_chr01_G001824	GO:0003700; GO:0005634; GO:0005667; GO:0006355; GO:0030154; GO:0043565; GO:0044212; GO:0045449	DNA; nucleus; transcription factor complex; regulation of transcription, DNA; cell differentiation; sequence; transcription regulatory region DNA binding	AT4G38620	ATMYB4; MYB4	myb domain protein 4	myb domain protein 4 myb domain protein 4	Potri.004G138000; Potri.005G112000; Potri.T144800; Potri.011G040300; Potri.004G174400; Potri.010G114000; Potri.009G134000; Potri.008G128500; Potri.006G221800
N1.HOG0000170	N1.HOG0000170_707	complete	0.000859349	Potra2n4c9673	Bpev01.c0549.g0004.m0001	FUN_007673-T1	PA_chr04_G002634	PS_chr01_G001822	PS_chr01_G001824	GO:0003700; GO:0005634; GO:0005667; GO:0006355; GO:0030154; GO:0043565; GO:0044212; GO:0045449	DNA; nucleus; transcription factor complex; regulation of transcription, DNA; cell differentiation; sequence; transcription regulatory region DNA binding	AT4G38620	ATMYB4; MYB4	myb domain protein 4	myb domain protein 4 myb domain protein 4	Potri.004G138000; Potri.005G112000; Potri.T144800; Potri.011G040300; Potri.004G174400; Potri.010G114000; Potri.009G134000; Potri.008G128500; Potri.006G221800
N1.HOG0000170	N1.HOG0000170_260	complete	0.000859361	Potra2n4c9673	Bpev01.c0549.g0004.m0001	FUN_030252-T1	PA_chr04_G002634	PS_chr01_G001822	PS_chr01_G001824	GO:0003700; GO:0005634; GO:0005667; GO:0006355; GO:0030154; GO:0043565; GO:0044212; GO:0045449	DNA; nucleus; transcription factor complex; regulation of transcription, DNA; cell differentiation; sequence; transcription regulatory region DNA binding	AT4G38620	ATMYB4; MYB4	myb domain protein 4	myb domain protein 4 myb domain protein 4	Potri.004G138000; Potri.005G112000; Potri.T144800; Potri.011G040300; Potri.004G174400; Potri.010G114000; Potri.009G134000; Potri.008G128500; Potri.006G221800
N1.HOG0000170	N1.HOG0000170_455	complete	0.0010166	Potra2n4c9673	Bpev01.c0639.g0015.m0001	FUN_007778-T1	PA_chr04_G002634	PS_chr01_G001822	PS_chr04_G016676	GO:0003700; GO:0005634; GO:0005667; GO:0006355; GO:0030154; GO:0043565; GO:0044212; GO:0045449	DNA; nucleus; transcription factor complex; regulation of transcription, DNA; cell differentiation; sequence; transcription regulatory region DNA binding	AT4G38620	ATMYB4; MYB4	myb domain protein 4	myb domain protein 4 myb domain protein 4	Potri.004G138000; Potri.005G112000; Potri.T144800; Potri.011G040300; Potri.004G174400; Potri.010G114000; Potri.009G134000; Potri.008G128500; Potri.006G221800
N1.HOG0000170	N1.HOG0000170_659	complete	0.00102437	Potra2n4c9673	Bpev01.c0639.g0015.m0001	FUN_007673-T1	PA_chr04_G002634	PS_chr01_G001822	PS_chr04_G016676	GO:0003700; GO:0005634; GO:0005667; GO:0006355; GO:0030154; GO:0043565; GO:0044212; GO:0045449	DNA; nucleus; transcription factor complex; regulation of transcription, DNA; cell differentiation; sequence; transcription regulatory region DNA binding	AT4G38620	ATMYB4; MYB4	myb domain protein 4	myb domain protein 4 myb domain protein 4	Potri.004G138000; Potri.005G112000; Potri.T144800; Potri.011G040300; Potri.004G174400; Potri.010G114000; Potri.009G134000; Potri.008G128500; Potri.006G221800
N1.HOG0000170	N1.HOG0000170_221	complete	0.00114692	Potra2n4c9673	Bpev01.c0639.g0015.m0001	FUN_030252-T1	PA_chr04_G002634	PS_chr04_G016676	PS_chr04_G016676	GO:0003700; GO:0005634; GO:0005667; GO:0006355; GO:0030154; GO:0043565; GO:0044212; GO:0045449	DNA; nucleus; transcription factor complex; regulation of transcription, DNA; cell differentiation; sequence; transcription regulatory region DNA binding	AT4G38620	ATMYB4; MYB4	myb domain protein 4	myb domain protein 4 myb domain protein 4	Potri.004G138000; Potri.005G112000; Potri.T144800; Potri.011G040300; Potri.004G174400; Potri.010G114000; Potri.009G134000; Potri.008G128500; Potri.006G221800
N1.HOG0000170	N1.HOG0000170_269	complete	0.00114813	Potra2n4c9673	Bpev01.c0639.g0015.m0001	FUN_030252-T1	PA_chr01_G002769	PS_chr04_G016676	PS_chr04_G016676	GO:0003700; GO:0005634; GO:0005667; GO:0006355; GO:0030154; GO:0043565; GO:0044212; GO:0045449	DNA; nucleus; transcription factor complex; regulation of transcription, DNA; cell differentiation; sequence; transcription regulatory region DNA binding	AT4G38620	ATMYB4; MYB4	myb domain protein 4	myb domain protein 4 myb domain protein 4	Potri.004G138000; Potri.005G112000; Potri.T144800; Potri.011G040300; Potri.004G174400; Potri.010G114000; Potri.009G134000; Potri.008G128500; Potri.006G221800
N1.HOG0000170	N1.HOG0000170_270	complete	0.00114833	Potra2n4c9673	Bpev01.c0639.g0015.m0001	FUN_030252-T1	PA_chr01_G002769	PS_chr01_G001822	PS_chr04_G016676	GO:0003700; GO:0005634; GO:0005667; GO:0006355; GO:0030154; GO:0043565; GO:0044212; GO:0045449	DNA; nucleus; transcription factor complex; regulation of transcription, DNA; cell differentiation; sequence; transcription regulatory region DNA binding	AT4G38620	ATMYB4; MYB4	myb domain protein 4	myb domain protein 4 myb domain protein 4	Potri.004G138000; Potri.005G112000; Potri.T144800; Potri.011G040300; Potri.004G174400; Potri.010G114000; Potri.009G134000; Potri.008G128500; Potri.006G221800
N1.HOG0000170	N1.HOG0000170_237	complete	0.00136182	Potra2n19c34420	Bpev01.c0639.g0015.m0001	FUN_030252-T1	PA_chr04_G002634	PS_chr04_G016676	PS_chr01_G001824	GO:0003700; GO:0005634; GO:0005667; GO:0006355; GO:0030154; GO:0043565; GO:0044212; GO:0045449	DNA; nucleus; transcription factor complex; regulation of transcription, DNA; cell differentiation; sequence; transcription regulatory region DNA binding	AT4G38620	ATMYB4; MYB4	myb domain protein 4	myb domain protein 4 myb domain protein 4	Potri.004G138000; Potri.005G112000; Potri.T144800; Potri.011G040300; Potri.004G174400; Potri.010G114000; Potri.009G134000; Potri.008G128500; Potri.006G221800
N1.HOG0000170	N1.HOG0000170_255	complete	0.00136182	Potra2n19c34420	Bpev01.c0549.g0004.m0001	FUN_030252-T1	PA_chr04_G002634	PS_chr04_G016676	PS_chr01_G001824	GO:0003700; GO:0005634; GO:0005667; GO:0006355; GO:0030154; GO:0043565; GO:0044212; GO:0045449	DNA; nucleus; transcription factor complex; regulation of transcription, DNA; cell differentiation; sequence; transcription regulatory region DNA binding	AT4G38620	ATMYB4; MYB4	myb domain protein 4	myb domain protein 4 myb domain protein 4	Potri.004G138000; Potri.005G112000; Potri.T144800; Potri.011G040300; Potri.004G174400; Potri.010G114000; Potri.009G134000; Potri.008G128500; Potri.006G221800
N1.HOG0000170	N1.HOG0000170_236	complete	0.00136187	Potra2n19c34420	Bpev01.c0639.g0015.m0001	FUN_030252-T1	PA_chr04_G002634	PS_chr01_G001818	PS_chr01_G001824	GO:0003700; GO:0005634; GO:0005667; GO:0006355; GO:0030154; GO:0043565; GO:0044212; GO:0045449	DNA; nucleus; transcription factor complex; regulation of transcription, DNA; cell differentiation; sequence; transcription regulatory region DNA binding	AT4G38620	ATMYB4; MYB4	myb domain protein 4	myb domain protein 4 myb domain protein 4	Potri.004G138000; Potri.005G112000; Potri.T144800; Potri.011G040300; Potri.004G174400; Potri.010G114000; Potri.009G134000; Potri.008G128500; Potri.006G221800
N1.HOG0000170	N1.HOG0000170_254	complete	0.00136187	Potra2n19c34420	Bpev01.c0549.g0004.m0001	FUN_030252-T1	PA_chr04_G002634	PS_chr01_G001818	PS_chr01_G001824	GO:0003700; GO:0005634; GO:0005667; GO:0006355; GO:0030154; GO:0043565; GO:0044212; GO:0045449	DNA; nucleus; transcription factor complex; regulation of transcription, DNA; cell differentiation; sequence; transcription regulatory region DNA binding	AT4G38620	ATMYB4; MYB4	myb domain protein 4	myb domain protein 4 myb domain protein 4	Potri.004G138000; Potri.005G112000; Potri.T144800; Potri.011G040300; Potri.004G174400; Potri.010G114000; Potri.009G134000; Potri.008G128500; Potri.006G221800
N1.HOG0000170	N1.HOG0000170_395	complete	0.00141085	Potra2n9c18946	Bpev01.c0549.g0004.m0001	FUN_007778-T1	PA_chr04_G002634	PS_chr04_G016676	PS_chr01_G001824	GO:0003700; GO:0005634; GO:0005667; GO:0006355; GO:0030154; GO:0043565; GO:0044212; GO:0045449	DNA; nucleus; transcription factor complex; regulation of transcription, DNA; cell differentiation; sequence; transcription regulatory region DNA binding	AT4G38620	ATMYB4; MYB4	myb domain protein 4	myb domain protein 4 myb domain protein 4	Potri.004G138000; Potri.005G112000; Potri.T144800; Potri.011G040300; Potri.004G174400; Potri.010G114000; Potri.009G134000; Potri.008G128500; Potri.006G221800
N1.HOG0000170	N1.HOG0000170_335	complete	0.00141086	Potra2n9c18946	Bpev01.c0639.g0015.m0001	FUN_007778-T1	PA_chr04_G002634	PS_chr04_G016676	PS_chr01_G001824	GO:0003700; GO:0005634; GO:0005667; GO:0006355; GO:0030154; GO:0043565; GO:0044212; GO:0045449	DNA; nucleus; transcription factor complex; regulation of transcription, DNA; cell differentiation; sequence; transcription regulatory region DNA binding	AT4G38620	ATMYB4; MYB4	myb domain protein 4	myb domain protein 4 myb domain protein 4	Potri.004G138000; Potri.005G112000; Potri.T144800; Potri.011G040300; Potri.004G174400; Potri.010G114000; Potri.009G134000; Potri.008G128500; Potri.006G221800
N1.HOG0000170	N1.HOG0000170_587	complete	0.00141095	Potra2n9c18946	Bpev01.c0549.g0004.m0001	FUN_007673-T1	PA_chr04_G002634	PS_chr04_G016676	PS_chr01_G001824	GO:0003700; GO:0005634; GO:0005667; GO:0006355; GO:0030154; GO:0043565; GO:0044212; GO:0045449	DNA; nucleus; transcription factor complex; regulation of transcription, DNA; cell differentiation; sequence; transcription regulatory region DNA binding	AT4G38620	ATMYB4; MYB4	myb domain protein 4	myb domain protein 4 myb domain protein 4	Potri.004G138000; Potri.005G112000; Potri.T144800; Potri.011G040300; Potri.004G174400; Potri.010G114000; Potri.009G134000; Potri.008G128500; Potri.006G221800
N1.HOG0000170	N1.HOG0000170_228	complete	0.00141097	Potra2n9c18946	Bpev01.c0639.g0015.m0001	FUN_030252-T1	PA_chr04_G002634	PS_chr04_G016676	PS_chr01_G001824	GO:0003700; GO:0005634; GO:0005667; GO:0006355; GO:0030154; GO:0043565; GO:0044212; GO:0045449	DNA; nucleus; transcription factor complex; regulation of transcription, DNA; cell differentiation; sequence; transcription regulatory region DNA binding	AT4G38620	ATMYB4; MYB4	myb domain protein 4	myb domain protein 4 myb domain protein 4	Potri.004G138000; Potri.005G112000; Potri.T144800; Potri.011G040300; Potri.004G174400; Potri.010G114000; Potri.009G134000; Potri.008G128500; Potri.006G221800
N1.HOG0000170	N1.HOG0000170_251	complete	0.00141097	Potra2n9c18946	Bpev01.c0549.g0004.m0001	FUN_030252-T1	PA_chr04_G002634	PS_chr04_G016676	PS_chr01_G001824	GO:0003700; GO:0005634; GO:0005667; GO:0006355; GO:0030154; GO:0043565; GO:0044212; GO:0045449	DNA; nucleus; transcription factor complex; regulation of transcription, DNA; cell differentiation; sequence; transcription regulatory region DNA binding	AT4G38620	ATMYB4; MYB4	myb domain protein 4	myb domain protein 4 myb domain protein 4	Potri.004G138000; Potri.005G112000; Potri.T144800; Potri.011G040300; Potri.004G174400; Potri.010G114000; Potri.009G134000; Potri.008G128500; Potri.006G221800
N1.HOG0000170	N1.HOG0000170_581	complete	0.00141101	Potra2n9c18946	Bpev01.c0549.g0004.m0001	FUN_007673-T1	PA_chr04_G002634	PS_chr01_G001818	PS_chr01_G001824	GO:0003700; GO:0005634; GO:0005667; GO:0006355; GO:0030154; GO:0043565; GO:0044212; GO:0045449	DNA; nucleus; transcription factor complex; regulation of transcription, DNA; cell differentiation; sequence; transcription regulatory region DNA binding	AT4G38620	ATMYB4; MYB4	myb domain protein 4	myb domain protein 4 myb domain protein 4	Potri.004G138000; Potri.005G112000; Potri.T144800; Potri.011G040300; Potri.004G174400; Potri.010G114000; Potri.009G134000; Potri.008G128500; Potri.006G221800
N1.HOG0000170	N1.HOG0000170_227	complete	0.00141102	Potra2n9c18946	Bpev01.c0639.g0015.m0001	FUN_030252-T1	PA_chr04_G002634	PS_chr01_G001818	PS_chr01_G001824	GO:0003700; GO:0005634; GO:0005667; GO:0006355; GO:0030154; GO:0043565; GO:0044212; GO:0045449	DNA; nucleus; transcription factor complex; regulation of transcription, DNA; cell differentiation; sequence; transcription regulatory region DNA binding	AT4G38620	ATMYB4; MYB4	myb domain protein 4	myb domain protein 4 myb domain protein 4	Potri.004G138000; Potri.005G112000; Potri.T144800; Potri.011G040300; Potri.004G174400; Potri.010G114000; Potri.009G134000; Potri.008G128500; Potri.006G221800
N1.HOG0000170	N1.HOG0000170_250	complete	0.00141102	Potra2n9c18946	Bpev01.c0549.g0004.m0001	FUN_030252-T1	PA_chr04_G002634	PS_chr01_G001818	PS_chr01_G001824	GO:0003700; GO:0005634; GO:0005667; GO:0006355; GO:0030154; GO:0043565; GO:0044212; GO:0045449	DNA; nucleus; transcription factor complex; regulation of transcription, DNA; cell differentiation; sequence; transcription regulatory region DNA binding	AT4G38620	ATMYB4; MYB4	myb domain protein 4	myb domain protein 4 myb domain protein 4	Potri.004G138000; Potri.005G112000; Potri.T144800; Potri.011G040300; Potri.004G174400; Potri.010G114000; Potri.009G134000; Potri.008G128500; Potri.006G221800
N1.HOG0000170	N1.HOG0000170_527	complete	0.00141108	Potra2n9c18946	Bpev01.c0639.g0015.m0001	FUN_007673-T1	PA_chr04_G002634	PS_chr04_G016676	PS_chr01_G001824	GO:0003700; GO:0005634; GO:0005667; GO:0006355; GO:0030154; GO:0043565; GO:0044212; GO:0045449	DNA; nucleus; transcription factor complex; regulation of transcription, DNA; cell differentiation; sequence; transcription regulatory region DNA binding	AT4G38620	ATMYB4; MYB4	myb domain protein 4	myb domain protein 4 myb domain protein 4	Potri.004G138000; Potri.005G112000; Potri.T144800; Potri.011G040300; Potri.004G174400; Potri.010G114000; Potri.009G134000; Potri.008G128500; Potri.006G221800
N1.HOG0000170	N1.HOG0000170_521	complete	0.00141113	Potra2n9c18946	Bpev01.c0639.g0015.m0001	FUN_007673-T1	PA_chr04_G002634	PS_chr01_G001818	PS_chr01_G001824	GO:0003700; GO:0005634; GO:0005667; GO:0006355; GO:0030154; GO:0043565; GO:0044212; GO:0045449	DNA; nucleus; transcription factor complex; regulation of transcription, DNA; cell differentiation; sequence; transcription regulatory region DNA binding	AT4G38620	ATMYB4; MYB4	myb domain protein 4	myb domain protein 4 myb domain protein 4	Potri.004G138000; Potri.005G112000; Potri.T144800; Potri.011G040300; Potri.004G174400; Potri.010G114000; Potri.009G134000; Potri.008G128500; Potri.006G221800
N1.HOG0000170	N1.HOG0000170_397	complete	0.00141305	Potra2n9c18946	Bpev01.c0549.g0004.m0001	FUN_007778-T1	PA_chr01_G002759	PS_chr01_G001824	PS_chr01_G001824	GO:0003700; GO:0005634; GO:0005667; GO:0006355; GO:0030154; GO:0043565; GO:0044212; GO:0045449	DNA; nucleus; transcription factor complex; regulation of transcription, DNA; cell differentiation; sequence; transcription regulatory region DNA binding	AT4G38620	ATMYB4; MYB4	myb domain protein 4	myb domain protein 4 myb domain protein 4	Potri.004G138000; Potri.005G112000; Potri.T144800; Potri.011G040300; Potri.004G174400; Potri.010G114000; Potri.009G134000; Potri.008G128500; Potri.006G221800
N1.HOG0000170	N1.HOG0000170_391	complete	0.00141305	Potra2n9c18946	Bpev01.c0549.g0004.m0001	FUN_007778-T1	PA_chr01_G002759	PS_chr04_G016676	PS_chr01_G001824	GO:0003700; GO:0005634; GO:0005667; GO:0006355; GO:0030154; GO:0043565; GO:0044212; GO:0045449	DNA; nucleus; transcription factor complex; regulation of transcription, DNA; cell differentiation; sequence; transcription regulatory region DNA binding	AT4G38620	ATMYB4; MYB4	myb domain protein 4	myb domain protein 4 myb domain protein 4	Potri.004G138000; Potri.005G112000; Potri.T144800; Potri.011G040300; Potri.004G174400; Potri.010G114000; Potri.009G134000; Potri.008G128500; Potri.006G221800
N1.HOG0000170	N1.HOG0000170_331	complete	0.00141306	Potra2n9c18946	Bpev01.c0639.g0015.m0001	FUN_007778-T1	PA_chr01_G002759	PS_chr04_G016676	PS_chr01_G001824	GO:0003700; GO:0005634; GO:0005667; GO:0006355; GO:0030154; GO:0043565; GO:0044212; GO:0045449	DNA; nucleus; transcription factor complex; regulation of transcription, DNA; cell differentiation; sequence; transcription regulatory region DNA binding	AT4G38620	ATMYB4; MYB4	myb domain protein 4	myb domain protein 4 myb domain protein 4	Potri.004G138000; Potri.005G112000; Potri.T144800; Potri.011G040300; Potri.004G174400; Potri.010G114000; Potri.009G134000; Potri.008G128500; Potri.006G221800
N1.HOG0000170	N1.HOG0000170_349	complete	0.00141306	Potra2n9c18946	Bpev01.c0639.g0015.m0001	FUN_007778-T1	PA_chr01_G002759	PS_chr01_G001824	PS_chr01_G001824	GO:0003700; GO:0005634; GO:0005667; GO:0006355; GO:0030154; GO:0043565; GO:0044212; GO:0045449	DNA; nucleus; transcription factor complex; regulation of transcription, DNA; cell differentiation; sequence; transcription regulatory region DNA binding	AT4G38620	ATMYB4; MYB4	myb domain protein 4	myb domain protein 4 myb domain protein 4	Potri.004G138000; Potri.005G112000; Potri.T144800; Potri.011G040300; Potri.004G174400; Potri.010G114000; Potri.009G134000; Potri.008G128500; Potri.006G221800
N1.HOG0000170	N1.HOG0000170_577	complete	0.00141315	Potra2n9c18946	Bpev01.c0549.g0004.m0001	FUN_007673-T1	PA_chr01_G002759	PS_chr01_G001818	PS_chr01_G001824	GO:0003700; GO:0005634; GO:0005667; GO:0006355; GO:0030154; GO:0043565; GO:0044212; GO:0045449	DNA; nucleus; transcription factor complex; regulation of transcription, DNA; cell differentiation; sequence; transcription regulatory region DNA binding	AT4G38620	ATMYB4; MYB4	myb domain protein 4	myb domain protein 4 myb domain protein 4	Potri.004G138000; Potri.005G112000; Potri.T144800; Potri.011G040300; Potri.004G174400; Potri.010G114000; Potri.009G134000; Potri.008G128500; Potri.006G221800
N1.HOG0000170	N1.HOG0000170_589	complete	0.00141315	Potra2n9c18946	Bpev01.c0549.g0004.m0001	FUN_007673-T1	PA_chr01_G002759	PS_chr01_G001824	PS_chr01_G001824	GO:0003700; GO:0005634; GO:0005667; GO:0006355; GO:0030154; GO:0043565; GO:0044212; GO:0045449	DNA; nucleus; transcription factor complex; regulation of transcription, DNA; cell differentiation; sequence; transcription regulatory region DNA binding	AT4G38620	ATMYB4; MYB4	myb domain protein 4	myb domain protein 4 myb domain protein 4	Potri.004G138000; Potri.005G112000; Potri.T144800; Potri.011G040300; Potri.004G174400; Potri.010G114000; Potri.009G134000; Potri.008G128500; Potri.006G221800
N1.HOG0000170	N1.HOG0000170_583	complete	0.00141315	Potra2n9c18946	Bpev01.c0549.g0004.m0001	FUN_007673-T1	PA_chr01_G002759	PS_chr04_G016676	PS_chr01_G001824	GO:0003700; GO:0005634; GO:0005667; GO:0006355; GO:0030154; GO:0043565; GO:0044212; GO:0045449	DNA; nucleus; transcription factor complex; regulation of transcription, DNA; cell differentiation; sequence; transcription regulatory region DNA binding	AT4G38620	ATMYB4; MYB4	myb domain protein 4	myb domain protein 4 myb domain protein 4	Potri.004G138000; Potri.005G112000; Potri.T144800; Potri.011G040300; Potri.004G174400; Potri.010G114000; Potri.009G134000; Potri.008G128500; Potri.006G221800
N1.HOG0000170	N1.HOG0000170_361	complete	0.00141327	Potra2n9c18946	Bpev01.c0639.g0015.m0001	FUN_007778-T1	PA_chr01_G002759	PS_chr01_G001822	PS_chr01_G001824	GO:0003700; GO:0005634; GO:0005667; GO:0006355; GO:0030154; GO:0043565; GO:0044212; GO:0045449	DNA; nucleus; transcription factor complex; regulation of transcription, DNA; cell differentiation; sequence; transcription regulatory region DNA binding	AT4G38620	ATMYB4; MYB4	myb domain protein 4	myb domain protein 4 myb domain protein 4	Potri.004G138000; Potri.005G112000; Potri.T144800; Potri.011G040300; Potri.004G174400; Potri.010G114000; Potri.009G134000; Potri.008G128500; Potri.006G221800
N1.HOG0000170	N1.HOG0000170_523	complete	0.00141328	Potra2n9c18946	Bpev01.c0639.g0015.m0001	FUN_007673-T1	PA_chr01_G002759	PS_chr04_G016676	PS_chr01_G001824	GO:0003700; GO:0005634; GO:0005667; GO:0006355; GO:0030154; GO:0043565; GO:0044212; GO:0045449	DNA; nucleus; transcription factor complex; regulation of transcription, DNA; cell differentiation; sequence; transcription regulatory region DNA binding	AT4G38620	ATMYB4; MYB4	myb domain protein 4	myb domain protein 4 myb domain protein 4	Potri.004G138000; Potri.005G112000; Potri.T144800; Potri.011G040300; Potri.004G174400; Potri.010G114000; Potri.009G134000; Potri.008G128500; Potri.006G221800
N1.HOG0000170	N1.HOG0000170_517	complete	0.00141328	Potra2n9c18946	Bpev01.c0639.g0015.m0001	FUN_007673-T1	PA_chr01_G002759	PS_chr01_G001818	PS_chr01_G001824	GO:0003700; GO:0005634; GO:0005667; GO:0006355; GO:0030154; GO:0043565; GO:0044212; GO:0045449	DNA; nucleus; transcription factor complex; regulation of transcription, DNA; cell differentiation; sequence; transcription regulatory region DNA binding	AT4G38620	ATMYB4; MYB4	myb domain protein 4	myb domain protein 4 myb domain protein 4	Potri.004G138000; Potri.005G112000; Potri.T144800; Potri.011G040300; Potri.004G174400; Potri.010G114000; Potri.009G134000; Potri.008G128500; Potri.006G221800
N1.HOG0000170	N1.HOG0000170_529	complete	0.00141328	Potra2n9c18946	Bpev01.c0639.g0015.m0001	FUN_007673-T1	PA_chr01_G002759	PS_chr01_G001824	PS_chr01_G001824	GO:0003700; GO:0005634; GO:0005667; GO:0006355; GO:0030154; GO:0043565; GO:0044212; GO:0045449	DNA; nucleus; transcription factor complex; regulation of transcription, DNA; cell differentiation; sequence; transcription regulatory region DNA binding	AT4G38620	ATMYB4; MYB4	myb domain protein 4	myb domain protein 4 myb domain protein 4	Potri.004G138000; Potri.005G112000; Potri.T144800; Potri.011G040300; Potri.004G174400; Potri.010G114000; Potri.009G134000; Potri.008G128500; Potri.006G221800
N1.HOG0000170	N1.HOG0000170_535	complete	0.00141348	Potra2n9c18946	Bpev01.c0639.g0015.m0001	FUN_007673-T1	PA_chr01_G002759	PS_chr01_G001822	PS_chr01_G001824	GO:0003700; GO:0005634; GO:0005667; GO:0006355; GO:0030154; GO:0043565; GO:0044212; GO:0045449	DNA; nucleus; transcription factor complex; regulation of transcription, DNA; cell differentiation; sequence; transcription regulatory region DNA binding	AT4G38620	ATMYB4; MYB4	myb domain protein 4	myb domain protein 4 myb domain protein 4	Potri.004G138000; Potri.005G112000; Potri.T144800; Potri.011G040300; Potri.004G174400; Potri.010G114000; Potri.009G134000; Potri.008G128500; Potri.006G221800
N1.HOG0000170	N1.HOG0000170_403	complete	0.00141451	Potra2n9c18946	Bpev01.c0549.g0004.m0001	FUN_007778-T1	PA_chr01_G002759	PS_chr01_G001822	PS_chr01_G001824	GO:0003700; GO:0005634; GO:0005667; GO:0006355; GO:0030154; GO:0043565; GO:0044212; GO:0045449	DNA; nucleus; transcription factor complex; regulation of transcription, DNA; cell differentiation; sequence; transcription regulatory region DNA binding	AT4G38620	ATMYB4; MYB4	myb domain protein 4	myb domain protein 4 myb domain protein 4	Potri.004G138000; Potri.005G112000; Potri.T144800; Potri.011G040300; Potri.004G174400; Potri.010G114000; Potri.009G134000; Potri.008G128500; Potri.006G221800
N1.HOG0000170	N1.HOG0000170_595	complete	0.00141462	Potra2n9c18946	Bpev01.c0549.g0004.m0001	FUN_007673-T1	PA_chr01_G002759	PS_chr01_G001822	PS_chr01_G001824	GO:0003700; GO:0005634; GO:0005667; GO:0006355; GO:0030154; GO:0043565; GO:0044212; GO:0045449	DNA; nucleus; transcription factor complex; regulation of transcription, DNA; cell differentiation; sequence; transcription regulatory region DNA binding	AT4G38620	ATMYB4; MYB4	myb domain protein 4	myb domain protein 4 myb domain protein 4	Potri.004G138000; Potri.005G112000; Potri.T144800; Potri.011G040300; Potri.004G174400; Potri.010G114000; Potri.009G134000; Potri.008G128500; Potri.006G221800
N1.HOG0000170	N1.HOG0000170_393	complete	0.0016717	Potra2n9c18946	Bpev01.c0549.g0004.m0001	FUN_007778-T1	PA_chr01_G002758	PS_chr04_G016676	PS_chr01_G001824	GO:0003700; GO:0005634; GO:0005667; GO:0006355; GO:0030154; GO:0043565; GO:0044212; GO:0045449	DNA; nucleus; transcription factor complex; regulation of transcription, DNA; cell differentiation; sequence; transcription regulatory region DNA binding	AT4G38620	ATMYB4; MYB4	myb domain protein 4	myb domain protein 4 myb domain protein 4	Potri.004G138000; Potri.005G112000; Potri.T144800; Potri.011G040300; Potri.004G174400; Potri.010G114000; Potri.009G134000; Potri.008G128500; Potri.006G221800
N1.HOG0000170	N1.HOG0000170_399	complete	0.0016717	Potra2n9c18946	Bpev01.c0549.g0004.m0001	FUN_007778-T1	PA_chr01_G002758	PS_chr01_G001824	PS_chr01_G001824	GO:0003700; GO:0005634; GO:0005667; GO:0006355; GO:0030154; GO:0043565; GO:0044212; GO:0045449	DNA; nucleus; transcription factor complex; regulation of transcription, DNA; cell differentiation; sequence; transcription regulatory region DNA binding	AT4G38620	ATMYB4; MYB4	myb domain protein 4	myb domain protein 4 myb domain protein 4	Potri.004G138000; Potri.005G112000; Potri.T144800; Potri.011G040300; Potri.004G174400; Potri.010G114000; Potri.009G134000; Potri.008G128500; Potri.006G221800
N1.HOG0000170	N1.HOG0000170_333	complete	0.00167171	Potra2n9c18946	Bpev01.c0639.g0015.m0001	FUN_007778-T1	PA_chr01_G002758	PS_chr04_G016676	PS_chr01_G001824	GO:0003700; GO:0005634; GO:0005667; GO:0006355; GO:0030154; GO:0043565; GO:0044212; GO:0045449	DNA; nucleus; transcription factor complex; regulation of transcription, DNA; cell differentiation; sequence; transcription regulatory region DNA binding	AT4G38620	ATMYB4; MYB4	myb domain protein 4	myb domain protein 4 myb domain protein 4	Potri.004G138000; Potri.005G112000; Potri.T144800; Potri.011G040300; Potri.004G174400; Potri.010G114000; Potri.009G134000; Potri.008G128500; Potri.006G221800
N1.HOG0000170	N1.HOG0000170_351	complete	0.00167171	Potra2n9c18946	Bpev01.c0639.g0015.m0001	FUN_007778-T1	PA_chr01_G002758	PS_chr01_G001824	PS_chr01_G001824	GO:0003700; GO:0005634; GO:0005667; GO:0006355; GO:0030154; GO:0043565; GO:0044212; GO:0045449	DNA; nucleus; transcription factor complex; regulation of transcription, DNA; cell differentiation; sequence; transcription regulatory region DNA binding	AT4G38620	ATMYB4; MYB4	myb domain protein 4	myb domain protein 4 myb domain protein 4	Potri.004G138000; Potri.005G112000; Potri.T144800; Potri.011G040300; Potri.004G174400; Potri.010G114000; Potri.009G134000; Potri.008G128500; Potri.006G221800
N1.HOG0000170	N1.HOG0000170_585	complete	0.0016718	Potra2n9c18946	Bpev01.c0549.g0004.m0001	FUN_007673-T1	PA_chr01_G002758	PS_chr04_G016676	PS_chr01_G001824	GO:0003700; GO:0005634; GO:0005667; GO:0006355; GO:0030154; GO:0043565; GO:0044212; GO:0045449	DNA; nucleus; transcription factor complex; regulation of transcription, DNA; cell differentiation; sequence; transcription regulatory region DNA binding	AT4G38620	ATMYB4; MYB4	myb domain protein 4	myb domain protein 4 myb domain protein 4	Potri.004G138000; Potri.005G112000; Potri.T144800; Potri.011G040300; Potri.004G174400; Potri.010G114000; Potri.009G134000; Potri.008G128500; Potri.006G221800
N1.HOG0000170	N1.HOG0000170_591	complete	0.0016718	Potra2n9c18946	Bpev01.c0549.g0004.m0001	FUN_007673-T1	PA_chr01_G002758	PS_chr01_G001824	PS_chr01_G001824	GO:0003700; GO:0005634; GO:0005667; GO:0006355; GO:0030154; GO:0043565; GO:0044212; GO:0045449	DNA; nucleus; transcription factor complex; regulation of transcription, DNA; cell differentiation; sequence; transcription regulatory region DNA binding	AT4G38620	ATMYB4; MYB4	myb domain protein 4	myb domain protein 4 myb domain protein 4	Potri.004G138000; Potri.005G112000; Potri.T144800; Potri.011G040300; Potri.004G174400; Potri.010G114000; Potri.009G134000; Potri.008G128500; Potri.006G221800
N1.HOG0000170	N1.HOG0000170_579	complete	0.0016718	Potra2n9c18946	Bpev01.c0549.g0004.m0001	FUN_007673-T1	PA_chr01_G002758	PS_chr01_G001818	PS_chr01_G001824	GO:0003700; GO:0005634; GO:0005667; GO:0006355; GO:0030154; GO:0043565; GO:0044212; GO:0045449	DNA; nucleus; transcription factor complex; regulation of transcription, DNA; cell differentiation; sequence; transcription regulatory region DNA binding	AT4G38620	ATMYB4; MYB4	myb domain protein 4	myb domain protein 4 myb domain protein 4	Potri.004G138000; Potri.005G112000; Potri.T144800; Potri.011G040300; Potri.004G174400; Potri.010G114000; Potri.009G134000; Potri.008G128500; Potri.006G221800
N1.HOG0000170	N1.HOG0000170_363	complete	0.00167192	Potra2n9c18946	Bpev01.c0639.g0015.m0001	FUN_007778-T1	PA_chr01_G002758	PS_chr01_G001822	PS_chr01_G001824	GO:0003700; GO:0005634; GO:0005667; GO:0006355; GO:0030154; GO:0043565; GO:0044212; GO:0045449	DNA; nucleus; transcription factor complex; regulation of transcription, DNA; cell differentiation; sequence; transcription regulatory region DNA binding	AT4G38620	ATMYB4; MYB4	myb domain protein 4	myb domain protein 4 myb domain protein 4	Potri.004G138000; Potri.005G112000; Potri.T144800; Potri.011G040300; Potri.004G174400; Potri.010G114000; Potri.009G134000; Potri.008G128500; Potri.006G221800
N1.HOG0000170	N1.HOG0000170_525	complete	0.00167193	Potra2n9c18946	Bpev01.c0639.g0015.m0001	FUN_007673-T1	PA_chr01_G002758	PS_chr04_G016676	PS_chr01_G001824	GO:0003700; GO:0005634; GO:0005667; GO:0006355; GO:0030154; GO:0043565; GO:0044212; GO:0045449	DNA; nucleus; transcription factor complex; regulation of transcription, DNA; cell differentiation; sequence; transcription regulatory region DNA binding	AT4G38620	ATMYB4; MYB4	myb domain protein 4	myb domain protein 4 myb domain protein 4	Potri.004G138000; Potri.005G112000; Potri.T144800; Potri.011G040300; Potri.004G174400; Potri.010G114000; Potri.009G134000; Potri.008G128500; Potri.006G221800
N1.HOG0000170	N1.HOG0000170_531	complete	0.00167193	Potra2n9c18946	Bpev01.c0639.g0015.m0001	FUN_007673-T1	PA_chr01_G002758	PS_chr01_G001824	PS_chr01_G001824	GO:0003700; GO:0005634; GO:0005667; GO:0006355; GO:0030154; GO:0043565; GO:0044212; GO:0045449	DNA; nucleus; transcription factor complex; regulation of transcription, DNA; cell differentiation; sequence; transcription regulatory region DNA binding	AT4G38620	ATMYB4; MYB4	myb domain protein 4	myb domain protein 4 myb domain protein 4	Potri.004G138000; Potri.005G112000; Potri.T144800; Potri.011G040300; Potri.004G174400; Potri.010G114000; Potri.009G134000; Potri.008G128500; Potri.006G221800
N1.HOG0000170	N1.HOG0000170_519	complete	0.00167193	Potra2n9c18946	Bpev01.c0639.g0015.m0001	FUN_007673-T1	PA_chr01_G002758	PS_chr01_G001818	PS_chr01_G001824	GO:0003700; GO:0005634; GO:0005667; GO:0006355; GO:0030154; GO:0043565; GO:0044212; GO:0045449	DNA; nucleus; transcription factor complex; regulation of transcription, DNA; cell differentiation; sequence; transcription regulatory region DNA binding	AT4G38620	ATMYB4; MYB4	myb domain protein 4	myb domain protein 4 myb domain protein 4	Potri.004G138000; Potri.005G112000; Potri.T144800; Potri.011G040300; Potri.004G174400; Potri.010G114000; Potri.009G134000; Potri.008G128500; Potri.006G221800
N1.HOG0000170	N1.HOG0000170_537	complete	0.00167213	Potra2n9c18946	Bpev01.c0639.g0015.m0001	FUN_007673-T1	PA_chr01_G002758	PS_chr01_G001822	PS_chr01_G001824	GO:0003700; GO:0005634; GO:0005667; GO:0006355; GO:0030154; GO:0043565; GO:0044212; GO:0045449	DNA; nucleus; transcription factor complex; regulation of transcription, DNA; cell differentiation; sequence; transcription regulatory region DNA binding	AT4G38620	ATMYB4; MYB4	myb domain protein 4	myb domain protein 4 myb domain protein 4	Potri.004G138000; Potri.005G112000; Potri.T144800; Potri.011G040300; Potri.004G174400; Potri.010G114000; Potri.009G134000; Potri.008G128500; Potri.006G221800
N1.HOG0000170	N1.HOG0000170_405	complete	0.00167316	Potra2n9c18946	Bpev01.c0549.g0004.m0001	FUN_007778-T1	PA_chr01_G002758	PS_chr01_G001822	PS_chr01_G001824	GO:0003700; GO:0005634; GO:0005667; GO:0006355; GO:0030154; GO:0043565; GO:0044212; GO:0045449	DNA; nucleus; transcription factor complex; regulation of transcription, DNA; cell differentiation; sequence; transcription regulatory region DNA binding	AT4G38620	ATMYB4; MYB4	myb domain protein 4	myb domain protein 4 myb domain protein 4	Potri.004G138000; Potri.005G112000; Potri.T144800; Potri.011G040300; Potri.004G174400; Potri.010G114000; Potri.009G134000; Potri.008G128500; Potri.006G221800
N1.HOG0000170	N1.HOG0000170_597	complete	0.00167327	Potra2n9c18946	Bpev01.c0549.g0004.m0001	FUN_007673-T1	PA_chr01_G002758	PS_chr01_G001822	PS_chr01_G001824	GO:0003700; GO:0005634; GO:0005667; GO:0006355; GO:0030154; GO:0043565; GO:0044212; GO:0045449	DNA; nucleus; transcription factor complex; regulation of transcription, DNA; cell differentiation; sequence; transcription regulatory region DNA binding	AT4G38620	ATMYB4; MYB4	myb domain protein 4	myb domain protein 4 myb domain protein 4	Potri.004G138000; Potri.005G112000; Potri.T144800; Potri.011G040300; Potri.004G174400; Potri.010G114000; Potri.009G134000; Potri.008G128500; Potri.006G221800
N1.HOG0000170	N1.HOG0000170_400	complete	0.00167836	Potra2n9c18946	Bpev01.c0549.g0004.m0001	FUN_007778-T1	PA_chr01_G002762	PS_chr01_G001824	PS_chr01_G001824	GO:0003700; GO:0005634; GO:0005667; GO:0006355; GO:0030154; GO:0043565; GO:0044212; GO:0045449	DNA; nucleus; transcription factor complex; regulation of transcription, DNA; cell differentiation; sequence; transcription regulatory region DNA binding	AT4G38620	ATMYB4; MYB4	myb domain protein 4	myb domain protein 4 myb domain protein 4	Potri.004G138000; Potri.005G112000; Potri.T144800; Potri.011G040300; Potri.004G174400; Potri.010G114000; Potri.009G134000; Potri.008G128500; Potri.006G221800
N1.HOG0000170	N1.HOG0000170_394	complete	0.00167836	Potra2n9c18946	Bpev01.c0549.g0004.m0001	FUN_007778-T1	PA_chr01_G002762	PS_chr04_G016676	PS_chr01_G001824	GO:0003700; GO:0005634; GO:0005667; GO:0006355; GO:0030154; GO:0043565; GO:0044212; GO:0045449	DNA; nucleus; transcription factor complex; regulation of transcription, DNA; cell differentiation; sequence; transcription regulatory region DNA binding	AT4G38620	ATMYB4; MYB4	myb domain protein 4	myb domain protein 4 myb domain protein 4	Potri.004G138000; Potri.005G112000; Potri.T144800; Potri.011G040300; Potri.004G174400; Potri.010G114000; Potri.009G134000; Potri.008G128500; Potri.006G221800
N1.HOG0000170	N1.HOG0000170_334	complete	0.00167838	Potra2n9c18946	Bpev01.c0639.g0015.m0001	FUN_007778-T1	PA_chr01_G002762	PS_chr04_G016676	PS_chr01_G001824	GO:0003700; GO:0005634; GO:0005667; GO:0006355; GO:0030154; GO:0043565; GO:0044212; GO:0045449	DNA; nucleus; transcription factor complex; regulation of transcription, DNA; cell differentiation; sequence; transcription regulatory region DNA binding	AT4G38620	ATMYB4; MYB4	myb domain protein 4	myb domain protein 4 myb domain protein 4	Potri.004G138000; Potri.005G112000; Potri.T144800; Potri.011G040300; Potri.004G174400; Potri.010G114000; Potri.009G134000; Potri.008G128500; Potri.006G221800
N1.HOG0000170	N1.HOG0000170_352	complete	0.00167838	Potra2n9c18946	Bpev01.c0639.g0015.m0001	FUN_007778-T1	PA_chr01_G002762	PS_chr01_G001824	PS_chr01_G001824	GO:0003700; GO:0005634; GO:0005667; GO:0006355; GO:0030154; GO:0043565; GO:0044212; GO:0045449	DNA; nucleus; transcription factor complex; regulation of transcription, DNA; cell differentiation; sequence; transcription regulatory region DNA binding	AT4G38620	ATMYB4; MYB4	myb domain protein 4	myb domain protein 4 myb domain protein 4	Potri.004G138000; Potri.005G112000; Potri.T144800; Potri.011G040300; Potri.004G174400; Potri.010G114000; Potri.009G134000; Potri.008G128500; Potri.006G221800
N1.HOG0000170	N1.HOG0000170_580	complete	0.00167847	Potra2n9c18946	Bpev01.c0549.g0004.m0001	FUN_007673-T1	PA_chr01_G002762	PS_chr01_G001818	PS_chr01_G001824	GO:0003700; GO:0005634; GO:0005667; GO:0006355; GO:0030154; GO:0043565; GO:0044212; GO:0045449	DNA; nucleus; transcription factor complex; regulation of transcription, DNA; cell differentiation; sequence; transcription regulatory region DNA binding	AT4G38620	ATMYB4; MYB4	myb domain protein 4	myb domain protein 4 myb domain protein 4	Potri.004G138000; Potri.005G112000; Potri.T144800; Potri.011G040300; Potri.004G174400; Potri.010G114000; Potri.009G134000; Potri.008G128500; Potri.006G221800
N1.HOG0000170	N1.HOG0000170_592	complete	0.00167847	Potra2n9c18946	Bpev01.c0549.g0004.m0001	FUN_007673-T1	PA_chr01_G002762	PS_chr01_G001824	PS_chr01_G001824	GO:0003700; GO:0005634; GO:0005667; GO:0006355; GO:0030154; GO:0043565; GO:0044212; GO:0045449	DNA; nucleus; transcription factor complex; regulation of transcription, DNA; cell differentiation; sequence; transcription regulatory region DNA binding	AT4G38620	ATMYB4; MYB4	myb domain protein 4	myb domain protein 4 myb domain protein 4	Potri.004G138000; Potri.005G112000; Potri.T144800; Potri.011G040300; Potri.004G174400; Potri.010G114000; Potri.009G134000; Potri.008G128500; Potri.006G221800
N1.HOG0000170	N1.HOG0000170_586	complete	0.00167847	Potra2n9c18946	Bpev01.c0549.g0004.m0001	FUN_007673-T1	PA_chr01_G002762	PS_chr04_G016676	PS_chr01_G001824	GO:0003700; GO:0005634; GO:0005667; GO:0006355; GO:0030154; GO:0043565; GO:0044212; GO:0045449	DNA; nucleus; transcription factor complex; regulation of transcription, DNA; cell differentiation; sequence; transcription regulatory region DNA binding	AT4G38620	ATMYB4; MYB4	myb domain protein 4	myb domain protein 4 myb domain protein 4	Potri.004G138000; Potri.005G112000; Potri.T144800; Potri.011G040300; Potri.004G174400; Potri.010G114000; Potri.009G134000; Potri.008G128500; Potri.006G221800
N1.HOG0000170	N1.HOG0000170_364	complete	0.00167858	Potra2n9c18946	Bpev01.c0639.g0015.m0001	FUN_007778-T1	PA_chr01_G002762	PS_chr01_G001822	PS_chr01_G001824	GO:0003700; GO:0005634; GO:0005667; GO:0006355; GO:0030154; GO:0043565; GO:0044212; GO:0045449	DNA; nucleus; transcription factor complex; regulation of transcription, DNA; cell differentiation; sequence; transcription regulatory region DNA binding	AT4G38620	ATMYB4; MYB4	myb domain protein 4	myb domain protein 4 myb domain protein 4	Potri.004G138000; Potri.005G112000; Potri.T144800; Potri.011G040300; Potri.004G174400; Potri.010G114000; Potri.009G134000; Potri.008G128500; Potri.006G221800
N1.HOG0000170	N1.HOG0000170_526	complete	0.00167859	Potra2n9c18946	Bpev01.c0639.g0015.m0001	FUN_007673-T1	PA_chr01_G002762	PS_chr04_G016676	PS_chr01_G001824	GO:0003700; GO:0005634; GO:0005667; GO:0006355; GO:0030154; GO:0043565; GO:0044212; GO:0045449	DNA; nucleus; transcription factor complex; regulation of transcription, DNA; cell differentiation; sequence; transcription regulatory region DNA binding	AT4G38620	ATMYB4; MYB4	myb domain protein 4	myb domain protein 4 myb domain protein 4	Potri.004G138000; Potri.005G112000; Potri.T144800; Potri.011G040300; Potri.004G174400; Potri.010G114000; Potri.009G134000; Potri.008G128500; Potri.006G221800
N1.HOG0000170	N1.HOG0000170_520	complete	0.00167859	Potra2n9c18946	Bpev01.c0639.g0015.m0001	FUN_007673-T1	PA_chr01_G002762	PS_chr01_G001818	PS_chr01_G001824	GO:0003700; GO:0005634; GO:0005667; GO:0006355; GO:0030154; GO:0043565; GO:0044212; GO:0045449	DNA; nucleus; transcription factor complex; regulation of transcription, DNA; cell differentiation; sequence; transcription regulatory region DNA binding	AT4G38620	ATMYB4; MYB4	myb domain protein 4	myb domain protein 4 myb domain protein 4	Potri.004G138000; Potri.005G112000; Potri.T144800; Potri.011G040300; Potri.004G174400; Potri.010G114000; Potri.009G134000; Potri.008G128500; Potri.006G221800
N1.HOG0000170	N1.HOG0000170_532	complete	0.00167859	Potra2n9c18946	Bpev01.c0639.g0015.m0001	FUN_007673-T1	PA_chr01_G002762	PS_chr01_G001824	PS_chr01_G001824	GO:0003700; GO:0005634; GO:0005667; GO:0006355; GO:0030154; GO:0043565; GO:0044212; GO:0045449	DNA; nucleus; transcription factor complex; regulation of transcription, DNA; cell differentiation; sequence; transcription regulatory region DNA binding	AT4G38620	ATMYB4; MYB4	myb domain protein 4	myb domain protein 4 myb domain protein 4	Potri.004G138000; Potri.005G112000; Potri.T144800; Potri.011G040300; Potri.004G174400; Potri.010G114000; Potri.009G134000; Potri.008G128500; Potri.006G221800
N1.HOG0000170	N1.HOG0000170_538	complete	0.00167879	Potra2n9c18946	Bpev01.c0639.g0015.m0001	FUN_007673-T1	PA_chr01_G002762	PS_chr01_G001822	PS_chr01_G001824	GO:0003700; GO:0005634; GO:0005667; GO:0006355; GO:0030154; GO:0043565; GO:0044212; GO:0045449	DNA; nucleus; transcription factor complex; regulation of transcription, DNA; cell differentiation; sequence; transcription regulatory region DNA binding	AT4G38620	ATMYB4; MYB4	myb domain protein 4	myb domain protein 4 myb domain protein 4	Potri.004G138000; Potri.005G112000; Potri.T144800; Potri.011G040300; Potri.004G174400; Potri.010G114000; Potri.009G134000; Potri.008G128500; Potri.006G221800
N1.HOG0000170	N1.HOG0000170_406	complete	0.00167982	Potra2n9c18946	Bpev01.c0549.g0004.m0001	FUN_007778-T1	PA_chr01_G002762	PS_chr01_G001822	PS_chr01_G001824	GO:0003700; GO:0005634; GO:0005667; GO:0006355; GO:0030154; GO:0043565; GO:0044212; GO:0045449	DNA; nucleus; transcription factor complex; regulation of transcription, DNA; cell differentiation; sequence; transcription regulatory region DNA binding	AT4G38620	ATMYB4; MYB4	myb domain protein 4	myb domain protein 4 myb domain protein 4	Potri.004G138000; Potri.005G112000; Potri.T144800; Potri.011G040300; Potri.004G174400; Potri.010G114000; Potri.009G134000; Potri.008G128500; Potri.006G221800
N1.HOG0000170	N1.HOG0000170_598	complete	0.00167993	Potra2n9c18946	Bpev01.c0549.g0004.m0001	FUN_007673-T1	PA_chr01_G002762	PS_chr01_G001822	PS_chr01_G001824	GO:0003700; GO:0005634; GO:0005667; GO:0006355; GO:0030154; GO:0043565; GO:0044212; GO:0045449	DNA; nucleus; transcription factor complex; regulation of transcription, DNA; cell differentiation; sequence; transcription regulatory region DNA binding	AT4G38620	ATMYB4; MYB4	myb domain protein 4	myb domain protein 4 myb domain protein 4	Potri.004G138000; Potri.005G112000; Potri.T144800; Potri.011G040300; Potri.004G174400; Potri.010G114000; Potri.009G134000; Potri.008G128500; Potri.006G221800
N1.HOG0000170	N1.HOG0000170_172	complete	0.001925	Potra2n9c18946	Bpev01.c0549.g0004.m0001	FUN_030252-T1	PA_chr01_G002769	PS_chr01_G001824	PS_chr01_G001821	GO:0003700; GO:0005634; GO:0005667; GO:0006355; GO:0030154; GO:0043565; GO:0044212; GO:0045449	DNA; nucleus; transcription factor complex; regulation of transcription, DNA; cell differentiation; sequence; transcription regulatory region DNA binding	AT4G38620	ATMYB4; MYB4	myb domain protein 4	myb domain protein 4 myb domain protein 4	Potri.004G138000; Potri.005G112000; Potri.T144800; Potri.011G040300; Potri.004G174400; Potri.010G114000; Potri.009G134000; Potri.008G128500; Potri.006G221800
N1.HOG0000170	N1.HOG0000170_167	complete	0.001925	Potra2n9c18946	Bpev01.c0549.g0004.m0001	FUN_030252-T1	PA_chr01_G002769	PS_chr01_G001818	PS_chr01_G001821	GO:0003700; GO:0005634; GO:0005667; GO:0006355; GO:0030154; GO:0043565; GO:0044212; GO:0045449	DNA; nucleus; transcription factor complex; regulation of transcription, DNA; cell differentiation; sequence; transcription regulatory region DNA binding	AT4G38620	ATMYB4; MYB4	myb domain protein 4	myb domain protein 4 myb domain protein 4	Potri.004G138000; Potri.005G112000; Potri.T144800; Potri.011G040300; Potri.004G174400; Potri.010G114000; Potri.009G134000; Potri.008G128500; Potri.006G221800
N1.HOG0000170	N1.HOG0000170_177	complete	0.00192646	Potra2n9c18946	Bpev01.c0549.g0004.m0001	FUN_030252-T1	PA_chr01_G002769	PS_chr01_G001822	PS_chr01_G001821	GO:0003700; GO:0005634; GO:0005667; GO:0006355; GO:0030154; GO:0043565; GO:0044212; GO:0045449	DNA; nucleus; transcription factor complex; regulation of transcription, DNA; cell differentiation; sequence; transcription regulatory region DNA binding	AT4G38620	ATMYB4; MYB4	myb domain protein 4	myb domain protein 4 myb domain protein 4	Potri.004G138000; Potri.005G112000; Potri.T144800; Potri.011G040300; Potri.004G174400; Potri.010G114000; Potri.009G134000; Potri.008G128500; Potri.006G221800
N1.HOG0000170	N1.HOG0000170_222	complete	0.00196878	Potra2n4c9673	Bpev01.c0639.g0015.m0001	FUN_030252-T1	PA_chr04_G002634	PS_chr01_G001822	PS_chr04_G016676	GO:0003700; GO:0005634; GO:0005667; GO:0006355; GO:0030154; GO:0043565; GO:0044212; GO:0045449	DNA; nucleus; transcription factor complex; regulation of transcription, DNA; cell differentiation; sequence; transcription regulatory region DNA binding	AT4G38620	ATMYB4; MYB4	myb domain protein 4	myb domain protein 4 myb domain protein 4	Potri.004G138000; Potri.005G112000; Potri.T144800; Potri.011G040300; Potri.004G174400; Potri.010G114000; Potri.009G134000; Potri.008G128500; Potri.006G221800
N1.HOG0000170	N1.HOG0000170_365	complete	0.00223273	Potra2n9c18946	Bpev01.c0639.g0015.m0001	FUN_007778-T1	PA_chr04_G002634	PS_chr01_G001822	PS_chr01_G001824	GO:0003700; GO:0005634; GO:0005667; GO:0006355; GO:0030154; GO:0043565; GO:0044212; GO:0045449	DNA; nucleus; transcription factor complex; regulation of transcription, DNA; cell differentiation; sequence; transcription regulatory region DNA binding	AT4G38620	ATMYB4; MYB4	myb domain protein 4	myb domain protein 4 myb domain protein 4	Potri.004G138000; Potri.005G112000; Potri.T144800; Potri.011G040300; Potri.004G174400; Potri.010G114000; Potri.009G134000; Potri.008G128500; Potri.006G221800
N1.HOG0000170	N1.HOG0000170_230	complete	0.00223283	Potra2n9c18946	Bpev01.c0639.g0015.m0001	FUN_030252-T1	PA_chr04_G002634	PS_chr01_G001822	PS_chr01_G001824	GO:0003700; GO:0005634; GO:0005667; GO:0006355; GO:0030154; GO:0043565; GO:0044212; GO:0045449	DNA; nucleus; transcription factor complex; regulation of transcription, DNA; cell differentiation; sequence; transcription regulatory region DNA binding	AT4G38620	ATMYB4; MYB4	myb domain protein 4	myb domain protein 4 myb domain protein 4	Potri.004G138000; Potri.005G112000; Potri.T144800; Potri.011G040300; Potri.004G174400; Potri.010G114000; Potri.009G134000; Potri.008G128500; Potri.006G221800
N1.HOG0000170	N1.HOG0000170_539	complete	0.00223294	Potra2n9c18946	Bpev01.c0639.g0015.m0001	FUN_007673-T1	PA_chr04_G002634	PS_chr01_G001822	PS_chr01_G001824	GO:0003700; GO:0005634; GO:0005667; GO:0006355; GO:0030154; GO:0043565; GO:0044212; GO:0045449	DNA; nucleus; transcription factor complex; regulation of transcription, DNA; cell differentiation; sequence; transcription regulatory region DNA binding	AT4G38620	ATMYB4; MYB4	myb domain protein 4	myb domain protein 4 myb domain protein 4	Potri.004G138000; Potri.005G112000; Potri.T144800; Potri.011G040300; Potri.004G174400; Potri.010G114000; Potri.009G134000; Potri.008G128500; Potri.006G221800
N1.HOG0000170	N1.HOG0000170_407	complete	0.00223397	Potra2n9c18946	Bpev01.c0549.g0004.m0001	FUN_007778-T1	PA_chr04_G002634	PS_chr01_G001822	PS_chr01_G001824	GO:0003700; GO:0005634; GO:0005667; GO:0006355; GO:0030154; GO:0043565; GO:0044212; GO:0045449	DNA; nucleus; transcription factor complex; regulation of transcription, DNA; cell differentiation; sequence; transcription regulatory region DNA binding	AT4G38620	ATMYB4; MYB4	myb domain protein 4	myb domain protein 4 myb domain protein 4	Potri.004G138000; Potri.005G112000; Potri.T144800; Potri.011G040300; Potri.004G174400; Potri.010G114000; Potri.009G134000; Potri.008G128500; Potri.006G221800
N1.HOG0000170	N1.HOG0000170_599	complete	0.00223408	Potra2n9c18946	Bpev01.c0549.g0004.m0001	FUN_007673-T1	PA_chr04_G002634	PS_chr01_G001822	PS_chr01_G001824	GO:0003700; GO:0005634; GO:0005667; GO:0006355; GO:0030154; GO:0043565; GO:0044212; GO:0045449	DNA; nucleus; transcription factor complex; regulation of transcription, DNA; cell differentiation; sequence; transcription regulatory region DNA binding	AT4G38620	ATMYB4; MYB4	myb domain protein 4	myb domain protein 4 myb domain protein 4	Potri.004G138000; Potri.005G112000; Potri.T144800; Potri.011G040300; Potri.004G174400; Potri.010G114000; Potri.009G134000; Potri.008G128500; Potri.006G221800
N1.HOG0000170	N1.HOG0000170_253	complete	0.00223409	Potra2n9c18946	Bpev01.c0549.g0004.m0001	FUN_030252-T1	PA_chr04_G002634	PS_chr01_G001822	PS_chr01_G001824	GO:0003700; GO:0005634; GO:0005667; GO:0006355; GO:0030154; GO:0043565; GO:0044212; GO:0045449	DNA; nucleus; transcription factor complex; regulation of transcription, DNA; cell differentiation; sequence; transcription regulatory region DNA binding	AT4G38620	ATMYB4; MYB4	myb domain protein 4	myb domain protein 4 myb domain protein 4	Potri.004G138000; Potri.005G112000; Potri.T144800; Potri.011G040300; Potri.004G174400; Potri.010G114000; Potri.009G134000; Potri.008G128500; Potri.006G221800
N1.HOG0000170	N1.HOG0000170_398	complete	0.00236503	Potra2n9c18946	Bpev01.c0549.g0004.m0001	FUN_007778-T1	PA_chr01_G002769	PS_chr01_G001824	PS_chr01_G001824	GO:0003700; GO:0005634; GO:0005667; GO:0006355; GO:0030154; GO:0043565; GO:0044212; GO:0045449	DNA; nucleus; transcription factor complex; regulation of transcription, DNA; cell differentiation; sequence; transcription regulatory region DNA binding	AT4G38620	ATMYB4; MYB4	myb domain protein 4	myb domain protein 4 myb domain protein 4	Potri.004G138000; Potri.005G112000; Potri.T144800; Potri.011G040300; Potri.004G174400; Potri.010G114000; Potri.009G134000; Potri.008G128500; Potri.006G221800
N1.HOG0000170	N1.HOG0000170_392	complete	0.00236503	Potra2n9c18946	Bpev01.c0549.g0004.m0001	FUN_007778-T1	PA_chr01_G002769	PS_chr04_G016676	PS_chr01_G001824	GO:0003700; GO:0005634; GO:0005667; GO:0006355; GO:0030154; GO:0043565; GO:0044212; GO:0045449	DNA; nucleus; transcription factor complex; regulation of transcription, DNA; cell differentiation; sequence; transcription regulatory region DNA binding	AT4G38620	ATMYB4; MYB4	myb domain protein 4	myb domain protein 4 myb domain protein 4	Potri.004G138000; Potri.005G112000; Potri.T144800; Potri.011G040300; Potri.004G174400; Potri.010G114000; Potri.009G134000; Potri.008G128500; Potri.006G221800
N1.HOG0000170	N1.HOG0000170_332	complete	0.00236505	Potra2n9c18946	Bpev01.c0639.g0015.m0001	FUN_007778-T1	PA_chr01_G002769	PS_chr04_G016676	PS_chr01_G001824	GO:0003700; GO:0005634; GO:0005667; GO:0006355; GO:0030154; GO:0043565; GO:0044212; GO:0045449	DNA; nucleus; transcription factor complex; regulation of transcription, DNA; cell differentiation; sequence; transcription regulatory region DNA binding	AT4G38620	ATMYB4; MYB4	myb domain protein 4	myb domain protein 4 myb domain protein 4	Potri.004G138000; Potri.005G112000; Potri.T144800; Potri.011G040300; Potri.004G174400; Potri.010G114000; Potri.009G134000; Potri.008G128500; Potri.006G221800
N1.HOG0000170	N1.HOG0000170_350	complete	0.00236505	Potra2n9c18946	Bpev01.c0639.g0015.m0001	FUN_007778-T1	PA_chr01_G002769	PS_chr01_G001824	PS_chr01_G001824	GO:0003700; GO:0005634; GO:0005667; GO:0006355; GO:0030154; GO:0043565; GO:0044212; GO:0045449	DNA; nucleus; transcription factor complex; regulation of transcription, DNA; cell differentiation; sequence; transcription regulatory region DNA binding	AT4G38620	ATMYB4; MYB4	myb domain protein 4	myb domain protein 4 myb domain protein 4	Potri.004G138000; Potri.005G112000; Potri.T144800; Potri.011G040300; Potri.004G174400; Potri.010G114000; Potri.009G134000; Potri.008G128500; Potri.006G221800
N1.HOG0000170	N1.HOG0000170_590	complete	0.00236514	Potra2n9c18946	Bpev01.c0549.g0004.m0001	FUN_007673-T1	PA_chr01_G002769	PS_chr01_G001824	PS_chr01_G001824	GO:0003700; GO:0005634; GO:0005667; GO:0006355; GO:0030154; GO:0043565; GO:0044212; GO:0045449	DNA; nucleus; transcription factor complex; regulation of transcription, DNA; cell differentiation; sequence; transcription regulatory region DNA binding	AT4G38620	ATMYB4; MYB4	myb domain protein 4	myb domain protein 4 myb domain protein 4	Potri.004G138000; Potri.005G112000; Potri.T144800; Potri.011G040300; Potri.004G174400; Potri.010G114000; Potri.009G134000; Potri.008G128500; Potri.006G221800
N1.HOG0000170	N1.HOG0000170_578	complete	0.00236514	Potra2n9c18946	Bpev01.c0549.g0004.m0001	FUN_007673-T1	PA_chr01_G002769	PS_chr01_G001818	PS_chr01_G001824	GO:0003700; GO:0005634; GO:0005667; GO:0006355; GO:0030154; GO:0043565; GO:0044212; GO:0045449	DNA; nucleus; transcription factor complex; regulation of transcription, DNA; cell differentiation; sequence; transcription regulatory region DNA binding	AT4G38620	ATMYB4; MYB4	myb domain protein 4	myb domain protein 4 myb domain protein 4	Potri.004G138000; Potri.005G112000; Potri.T144800; Potri.011G040300; Potri.004G174400; Potri.010G114000; Potri.009G134000; Potri.008G128500; Potri.006G221800
N1.HOG0000170	N1.HOG0000170_584	complete	0.00236514	Potra2n9c18946	Bpev01.c0549.g0004.m0001	FUN_007673-T1	PA_chr01_G002769	PS_chr04_G016676	PS_chr01_G001824	GO:0003700; GO:0005634; GO:0005667; GO:0006355; GO:0030154; GO:0043565; GO:0044212; GO:0045449	DNA; nucleus; transcription factor complex; regulation of transcription, DNA; cell differentiation; sequence; transcription regulatory region DNA binding	AT4G38620	ATMYB4; MYB4	myb domain protein 4	myb domain protein 4 myb domain protein 4	Potri.004G138000; Potri.005G112000; Potri.T144800; Potri.011G040300; Potri.004G174400; Potri.010G114000; Potri.009G134000; Potri.008G128500; Potri.006G221800
N1.HOG0000170	N1.HOG0000170_279	complete	0.00236515	Potra2n9c18946	Bpev01.c0639.g0015.m0001	FUN_030252-T1	PA_chr01_G002769	PS_chr04_G016676	PS_chr01_G001824	GO:0003700; GO:0005634; GO:0005667; GO:0006355; GO:0030154; GO:0043565; GO:0044212; GO:0045449	DNA; nucleus; transcription factor complex; regulation of transcription, DNA; cell differentiation; sequence; transcription regulatory region DNA binding	AT4G38620	ATMYB4; MYB4	myb domain protein 4	myb domain protein 4 myb domain protein 4	Potri.004G138000; Potri.005G112000; Potri.T144800; Potri.011G040300; Potri.004G174400; Potri.010G114000; Potri.009G134000; Potri.008G128500; Potri.006G221800
N1.HOG0000170	N1.HOG0000170_312	complete	0.00236515	Potra2n9c18946	Bpev01.c0549.g0004.m0001	FUN_030252-T1	PA_chr01_G002769	PS_chr01_G001824	PS_chr01_G001824	GO:0003700; GO:0005634; GO:0005667; GO:0006355; GO:0030154; GO:0043565; GO:0044212; GO:0045449	DNA; nucleus; transcription factor complex; regulation of transcription, DNA; cell differentiation; sequence; transcription regulatory region DNA binding	AT4G38620	ATMYB4; MYB4	myb domain protein 4	myb domain protein 4 myb domain protein 4	Potri.004G138000; Potri.005G112000; Potri.T144800; Potri.011G040300; Potri.004G174400; Potri.010G114000; Potri.009G134000; Potri.008G128500; Potri.006G221800
N1.HOG0000170	N1.HOG0000170_278	complete	0.00236515	Potra2n9c18946	Bpev01.c0639.g0015.m0001	FUN_030252-T1	PA_chr01_G002769	PS_chr01_G001818	PS_chr01_G001824	GO:0003700; GO:0005634; GO:0005667; GO:0006355; GO:0030154; GO:0043565; GO:0044212; GO:0045449	DNA; nucleus; transcription factor complex; regulation of transcription, DNA; cell differentiation; sequence; transcription regulatory region DNA binding	AT4G38620	ATMYB4; MYB4	myb domain protein 4	myb domain protein 4 myb domain protein 4	Potri.004G138000; Potri.005G112000; Potri.T144800; Potri.011G040300; Potri.004G174400; Potri.010G114000; Potri.009G134000; Potri.008G128500; Potri.006G221800
N1.HOG0000170	N1.HOG0000170_310	complete	0.00236515	Potra2n9c18946	Bpev01.c0549.g0004.m0001	FUN_030252-T1	PA_chr01_G002769	PS_chr01_G001818	PS_chr01_G001824	GO:0003700; GO:0005634; GO:0005667; GO:0006355; GO:0030154; GO:0043565; GO:0044212; GO:0045449	DNA; nucleus; transcription factor complex; regulation of transcription, DNA; cell differentiation; sequence; transcription regulatory region DNA binding	AT4G38620	ATMYB4; MYB4	myb domain protein 4	myb domain protein 4 myb domain protein 4	Potri.004G138000; Potri.005G112000; Potri.T144800; Potri.011G040300; Potri.004G174400; Potri.010G114000; Potri.009G134000; Potri.008G128500; Potri.006G221800
N1.HOG0000170	N1.HOG0000170_280	complete	0.00236515	Potra2n9c18946	Bpev01.c0639.g0015.m0001	FUN_030252-T1	PA_chr01_G002769	PS_chr01_G001824	PS_chr01_G001824	GO:0003700; GO:0005634; GO:0005667; GO:0006355; GO:0030154; GO:0043565; GO:0044212; GO:0045449	DNA; nucleus; transcription factor complex; regulation of transcription, DNA; cell differentiation; sequence; transcription regulatory region DNA binding	AT4G38620	ATMYB4; MYB4	myb domain protein 4	myb domain protein 4 myb domain protein 4	Potri.004G138000; Potri.005G112000; Potri.T144800; Potri.011G040300; Potri.004G174400; Potri.010G114000; Potri.009G134000; Potri.008G128500; Potri.006G221800
N1.HOG0000170	N1.HOG0000170_311	complete	0.00236515	Potra2n9c18946	Bpev01.c0549.g0004.m0001	FUN_030252-T1	PA_chr01_G002769	PS_chr04_G016676	PS_chr01_G001824	GO:0003700; GO:0005634; GO:0005667; GO:0006355; GO:0030154; GO:0043565; GO:0044212; GO:0045449	DNA; nucleus; transcription factor complex; regulation of transcription, DNA; cell differentiation; sequence; transcription regulatory region DNA binding	AT4G38620	ATMYB4; MYB4	myb domain protein 4	myb domain protein 4 myb domain protein 4	Potri.004G138000; Potri.005G112000; Potri.T144800; Potri.011G040300; Potri.004G174400; Potri.010G114000; Potri.009G134000; Potri.008G128500; Potri.006G221800
N1.HOG0000170	N1.HOG0000170_362	complete	0.00236525	Potra2n9c18946	Bpev01.c0639.g0015.m0001	FUN_007778-T1	PA_chr01_G002769	PS_chr01_G001822	PS_chr01_G001824	GO:0003700; GO:0005634; GO:0005667; GO:0006355; GO:0030154; GO:0043565; GO:0044212; GO:0045449	DNA; nucleus; transcription factor complex; regulation of transcription, DNA; cell differentiation; sequence; transcription regulatory region DNA binding	AT4G38620	ATMYB4; MYB4	myb domain protein 4	myb domain protein 4 myb domain protein 4	Potri.004G138000; Potri.005G112000; Potri.T144800; Potri.011G040300; Potri.004G174400; Potri.010G114000; Potri.009G134000; Potri.008G128500; Potri.006G221800
N1.HOG0000170	N1.HOG0000170_524	complete	0.00236526	Potra2n9c18946	Bpev01.c0639.g0015.m0001	FUN_007673-T1	PA_chr01_G002769	PS_chr04_G016676	PS_chr01_G001824	GO:0003700; GO:0005634; GO:0005667; GO:0006355; GO:0030154; GO:0043565; GO:0044212; GO:0045449	DNA; nucleus; transcription factor complex; regulation of transcription, DNA; cell differentiation; sequence; transcription regulatory region DNA binding	AT4G38620	ATMYB4; MYB4	myb domain protein 4	myb domain protein 4 myb domain protein 4	Potri.004G138000; Potri.005G112000; Potri.T144800; Potri.011G040300; Potri.004G174400; Potri.010G114000; Potri.009G134000; Potri.008G128500; Potri.006G221800
N1.HOG0000170	N1.HOG0000170_518	complete	0.00236526	Potra2n9c18946	Bpev01.c0639.g0015.m0001	FUN_007673-T1	PA_chr01_G002769	PS_chr01_G001818	PS_chr01_G001824	GO:0003700; GO:0005634; GO:0005667; GO:0006355; GO:0030154; GO:0043565; GO:0044212; GO:0045449	DNA; nucleus; transcription factor complex; regulation of transcription, DNA; cell differentiation; sequence; transcription regulatory region DNA binding	AT4G38620	ATMYB4; MYB4	myb domain protein 4	myb domain protein 4 myb domain protein 4	Potri.004G138000; Potri.005G112000; Potri.T144800; Potri.011G040300; Potri.004G174400; Potri.010G114000; Potri.009G134000; Potri.008G128500; Potri.006G221800
N1.HOG0000170	N1.HOG0000170_530	complete	0.00236526	Potra2n9c18946	Bpev01.c0639.g0015.m0001	FUN_007673-T1	PA_chr01_G002769	PS_chr01_G001824	PS_chr01_G001824	GO:0003700; GO:0005634; GO:0005667; GO:0006355; GO:0030154; GO:0043565; GO:0044212; GO:0045449	DNA; nucleus; transcription factor complex; regulation of transcription, DNA; cell differentiation; sequence; transcription regulatory region DNA binding	AT4G38620	ATMYB4; MYB4	myb domain protein 4	myb domain protein 4 myb domain protein 4	Potri.004G138000; Potri.005G112000; Potri.T144800; Potri.011G040300; Potri.004G174400; Potri.010G114000; Potri.009G134000; Potri.008G128500; Potri.006G221800
N1.HOG0000170	N1.HOG0000170_281	complete	0.00236535	Potra2n9c18946	Bpev01.c0639.g0015.m0001	FUN_030252-T1	PA_chr01_G002769	PS_chr01_G001822	PS_chr01_G001824	GO:0003700; GO:0005634; GO:0005667; GO:0006355; GO:0030154; GO:0043565; GO:0044212; GO:0045449	DNA; nucleus; transcription factor complex; regulation of transcription, DNA; cell differentiation; sequence; transcription regulatory region DNA binding	AT4G38620	ATMYB4; MYB4	myb domain protein 4	myb domain protein 4 myb domain protein 4	Potri.004G138000; Potri.005G112000; Potri.T144800; Potri.011G040300; Potri.004G174400; Potri.010G114000; Potri.009G134000; Potri.008G128500; Potri.006G221800
N1.HOG0000170	N1.HOG0000170_536	complete	0.00236546	Potra2n9c18946	Bpev01.c0639.g0015.m0001	FUN_007673-T1	PA_chr01_G002769	PS_chr01_G001822	PS_chr01_G001824	GO:0003700; GO:0005634; GO:0005667; GO:0006355; GO:0030154; GO:0043565; GO:0044212; GO:0045449	DNA; nucleus; transcription factor complex; regulation of transcription, DNA; cell differentiation; sequence; transcription regulatory region DNA binding	AT4G38620	ATMYB4; MYB4	myb domain protein 4	myb domain protein 4 myb domain protein 4	Potri.004G138000; Potri.005G112000; Potri.T144800; Potri.011G040300; Potri.004G174400; Potri.010G114000; Potri.009G134000; Potri.008G128500; Potri.006G221800
N1.HOG0000170	N1.HOG0000170_404	complete	0.00236649	Potra2n9c18946	Bpev01.c0549.g0004.m0001	FUN_007778-T1	PA_chr01_G002769	PS_chr01_G001822	PS_chr01_G001824	GO:0003700; GO:0005634; GO:0005667; GO:0006355; GO:0030154; GO:0043565; GO:0044212; GO:0045449	DNA; nucleus; transcription factor complex; regulation of transcription, DNA; cell differentiation; sequence; transcription regulatory region DNA binding	AT4G38620	ATMYB4; MYB4	myb domain protein 4	myb domain protein 4 myb domain protein 4	Potri.004G138000; Potri.005G112000; Potri.T144800; Potri.011G040300; Potri.004G174400; Potri.010G114000; Potri.009G134000; Potri.008G128500; Potri.006G221800
N1.HOG0000170	N1.HOG0000170_596	complete	0.0023666	Potra2n9c18946	Bpev01.c0549.g0004.m0001	FUN_007673-T1	PA_chr01_G002769	PS_chr01_G001822	PS_chr01_G001824	GO:0003700; GO:0005634; GO:0005667; GO:0006355; GO:0030154; GO:0043565; GO:0044212; GO:0045449	DNA; nucleus; transcription factor complex; regulation of transcription, DNA; cell differentiation; sequence; transcription regulatory region DNA binding	AT4G38620	ATMYB4; MYB4	myb domain protein 4	myb domain protein 4 myb domain protein 4	Potri.004G138000; Potri.005G112000; Potri.T144800; Potri.011G040300; Potri.004G174400; Potri.010G114000; Potri.009G134000; Potri.008G128500; Potri.006G221800
N1.HOG0000170	N1.HOG0000170_313	complete	0.00236661	Potra2n9c18946	Bpev01.c0549.g0004.m0001	FUN_030252-T1	PA_chr01_G002769	PS_chr01_G001822	PS_chr01_G001824	GO:0003700; GO:0005634; GO:0005667; GO:0006355; GO:0030154; GO:0043565; GO:0044212; GO:0045449	DNA; nucleus; transcription factor complex; regulation of transcription, DNA; cell differentiation; sequence; transcription regulatory region DNA binding	AT4G38620	ATMYB4; MYB4	myb domain protein 4	myb domain protein 4 myb domain protein 4	Potri.004G138000; Potri.005G112000; Potri.T144800; Potri.011G040300; Potri.004G174400; Potri.010G114000; Potri.009G134000; Potri.008G128500; Potri.006G221800
N1.HOG0000170	N1.HOG0000170_315	complete	0.00283347	Potra2n9c18946	Bpev01.c0549.g0004.m0001	FUN_030252-T1	PA_chr01_G002769	PS_chr01_G001824	PS_chr01_G001817	GO:0003700; GO:0005634; GO:0005667; GO:0006355; GO:0030154; GO:0043565; GO:0044212; GO:0045449	DNA; nucleus; transcription factor complex; regulation of transcription, DNA; cell differentiation; sequence; transcription regulatory region DNA binding	AT4G38620	ATMYB4; MYB4	myb domain protein 4	myb domain protein 4 myb domain protein 4	Potri.004G138000; Potri.005G112000; Potri.T144800; Potri.011G040300; Potri.004G174400; Potri.010G114000; Potri.009G134000; Potri.008G128500; Potri.006G221800
N1.HOG0000170	N1.HOG0000170_284	complete	0.00283347	Potra2n9c18946	Bpev01.c0639.g0015.m0001	FUN_030252-T1	PA_chr01_G002769	PS_chr01_G001818	PS_chr01_G001817	GO:0003700; GO:0005634; GO:0005667; GO:0006355; GO:0030154; GO:0043565; GO:0044212; GO:0045449	DNA; nucleus; transcription factor complex; regulation of transcription, DNA; cell differentiation; sequence; transcription regulatory region DNA binding	AT4G38620	ATMYB4; MYB4	myb domain protein 4	myb domain protein 4 myb domain protein 4	Potri.004G138000; Potri.005G112000; Potri.T144800; Potri.011G040300; Potri.004G174400; Potri.010G114000; Potri.009G134000; Potri.008G128500; Potri.006G221800
N1.HOG0000170	N1.HOG0000170_314	complete	0.00283347	Potra2n9c18946	Bpev01.c0549.g0004.m0001	FUN_030252-T1	PA_chr01_G002769	PS_chr01_G001818	PS_chr01_G001817	GO:0003700; GO:0005634; GO:0005667; GO:0006355; GO:0030154; GO:0043565; GO:0044212; GO:0045449	DNA; nucleus; transcription factor complex; regulation of transcription, DNA; cell differentiation; sequence; transcription regulatory region DNA binding	AT4G38620	ATMYB4; MYB4	myb domain protein 4	myb domain protein 4 myb domain protein 4	Potri.004G138000; Potri.005G112000; Potri.T144800; Potri.011G040300; Potri.004G174400; Potri.010G114000; Potri.009G134000; Potri.008G128500; Potri.006G221800
N1.HOG0000170	N1.HOG0000170_285	complete	0.00283347	Potra2n9c18946	Bpev01.c0639.g0015.m0001	FUN_030252-T1	PA_chr01_G002769	PS_chr01_G001824	PS_chr01_G001817	GO:0003700; GO:0005634; GO:0005667; GO:0006355; GO:0030154; GO:0043565; GO:0044212; GO:0045449	DNA; nucleus; transcription factor complex; regulation of transcription, DNA; cell differentiation; sequence; transcription regulatory region DNA binding	AT4G38620	ATMYB4; MYB4	myb domain protein 4	myb domain protein 4 myb domain protein 4	Potri.004G138000; Potri.005G112000; Potri.T144800; Potri.011G040300; Potri.004G174400; Potri.010G114000; Potri.009G134000; Potri.008G128500; Potri.006G221800
N1.HOG0000170	N1.HOG0000170_286	complete	0.00283368	Potra2n9c18946	Bpev01.c0639.g0015.m0001	FUN_030252-T1	PA_chr01_G002769	PS_chr01_G001822	PS_chr01_G001817	GO:0003700; GO:0005634; GO:0005667; GO:0006355; GO:0030154; GO:0043565; GO:0044212; GO:0045449	DNA; nucleus; transcription factor complex; regulation of transcription, DNA; cell differentiation; sequence; transcription regulatory region DNA binding	AT4G38620	ATMYB4; MYB4	myb domain protein 4	myb domain protein 4 myb domain protein 4	Potri.004G138000; Potri.005G112000; Potri.T144800; Potri.011G040300; Potri.004G174400; Potri.010G114000; Potri.009G134000; Potri.008G128500; Potri.006G221800
N1.HOG0000170	N1.HOG0000170_316	complete	0.00283494	Potra2n9c18946	Bpev01.c0549.g0004.m0001	FUN_030252-T1	PA_chr01_G002769	PS_chr01_G001822	PS_chr01_G001817	GO:0003700; GO:0005634; GO:0005667; GO:0006355; GO:0030154; GO:0043565; GO:0044212; GO:0045449	DNA; nucleus; transcription factor complex; regulation of transcription, DNA; cell differentiation; sequence; transcription regulatory region DNA binding	AT4G38620	ATMYB4; MYB4	myb domain protein 4	myb domain protein 4 myb domain protein 4	Potri.004G138000; Potri.005G112000; Potri.T144800; Potri.011G040300; Potri.004G174400; Potri.010G114000; Potri.009G134000; Potri.008G128500; Potri.006G221800
N1.HOG0000170	N1.HOG0000170_147	complete	0.00287533	Potra2n9c18946	Bpev01.c0549.g0004.m0001	FUN_030252-T1	PA_chr01_G002769	PS_chr01_G001821	PS_chr01_G001821	GO:0003700; GO:0005634; GO:0005667; GO:0006355; GO:0030154; GO:0043565; GO:0044212; GO:0045449	DNA; nucleus; transcription factor complex; regulation of transcription, DNA; cell differentiation; sequence; transcription regulatory region DNA binding	AT4G38620	ATMYB4; MYB4	myb domain protein 4	myb domain protein 4 myb domain protein 4	Potri.004G138000; Potri.005G112000; Potri.T144800; Potri.011G040300; Potri.004G174400; Potri.010G114000; Potri.009G134000; Potri.008G128500; Potri.006G221800
N1.HOG0000170	N1.HOG0000170_145	complete	0.00331548	Potra2n9c18946	Bpev01.c0549.g0004.m0001	FUN_030252-T1	PA_chr01_G002769	PS_chr01_G001821	PS_chr01_G001824	GO:0003700; GO:0005634; GO:0005667; GO:0006355; GO:0030154; GO:0043565; GO:0044212; GO:0045449	DNA; nucleus; transcription factor complex; regulation of transcription, DNA; cell differentiation; sequence; transcription regulatory region DNA binding	AT4G38620	ATMYB4; MYB4	myb domain protein 4	myb domain protein 4 myb domain protein 4	Potri.004G138000; Potri.005G112000; Potri.T144800; Potri.011G040300; Potri.004G174400; Potri.010G114000; Potri.009G134000; Potri.008G128500; Potri.006G221800
N1.HOG0000170	N1.HOG0000170_134	complete	0.00342548	Potra2n9c18946	Bpev01.c0639.g0015.m0001	FUN_030252-T1	PA_chr01_G002769	PS_chr01_G001821	PS_chr01_G001824	GO:0003700; GO:0005634; GO:0005667; GO:0006355; GO:0030154; GO:0043565; GO:0044212; GO:0045449	DNA; nucleus; transcription factor complex; regulation of transcription, DNA; cell differentiation; sequence; transcription regulatory region DNA binding	AT4G38620	ATMYB4; MYB4	myb domain protein 4	myb domain protein 4 myb domain protein 4	Potri.004G138000; Potri.005G112000; Potri.T144800; Potri.011G040300; Potri.004G174400; Potri.010G114000; Potri.009G134000; Potri.008G128500; Potri.006G221800
N1.HOG0000170	N1.HOG0000170_146	complete	0.00378381	Potra2n9c18946	Bpev01.c0549.g0004.m0001	FUN_030252-T1	PA_chr01_G002769	PS_chr01_G001821	PS_chr01_G001817	GO:0003700; GO:0005634; GO:0005667; GO:0006355; GO:0030154; GO:0043565; GO:0044212; GO:0045449	DNA; nucleus; transcription factor complex; regulation of transcription, DNA; cell differentiation; sequence; transcription regulatory region DNA binding	AT4G38620	ATMYB4; MYB4	myb domain protein 4	myb domain protein 4 myb domain protein 4	Potri.004G138000; Potri.005G112000; Potri.T144800; Potri.011G040300; Potri.004G174400; Potri.010G114000; Potri.009G134000; Potri.008G128500; Potri.006G221800
N1.HOG0000170	N1.HOG0000170_135	complete	0.00389381	Potra2n9c18946	Bpev01.c0639.g0015.m0001	FUN_030252-T1	PA_chr01_G002769	PS_chr01_G001821	PS_chr01_G001817	GO:0003700; GO:0005634; GO:0005667; GO:0006355; GO:0030154; GO:0043565; GO:0044212; GO:0045449	DNA; nucleus; transcription factor complex; regulation of transcription, DNA; cell differentiation; sequence; transcription regulatory region DNA binding	AT4G38620	ATMYB4; MYB4	myb domain protein 4	myb domain protein 4 myb domain protein 4	Potri.004G138000; Potri.005G112000; Potri.T144800; Potri.011G040300; Potri.004G174400; Potri.010G114000; Potri.009G134000; Potri.008G128500; Potri.006G221800
N1.HOG0000170	N1.HOG0000170_341	complete	0.00421364	Potra2n9c18946	Bpev01.c0639.g0015.m0001	FUN_007778-T1	PA_chr04_G002634	PS_chr04_G016676	PS_chr04_G016676	GO:0003700; GO:0005634; GO:0005667; GO:0006355; GO:0030154; GO:0043565; GO:0044212; GO:0045449	DNA; nucleus; transcription factor complex; regulation of transcription, DNA; cell differentiation; sequence; transcription regulatory region DNA binding	AT4G38620	ATMYB4; MYB4	myb domain protein 4	myb domain protein 4 myb domain protein 4	Potri.004G138000; Potri.005G112000; Potri.T144800; Potri.011G040300; Potri.004G174400; Potri.010G114000; Potri.009G134000; Potri.008G128500; Potri.006G221800
N1.HOG0000170	N1.HOG0000170_337	complete	0.00421584	Potra2n9c18946	Bpev01.c0639.g0015.m0001	FUN_007778-T1	PA_chr01_G002759	PS_chr04_G016676	PS_chr04_G016676	GO:0003700; GO:0005634; GO:0005667; GO:0006355; GO:0030154; GO:0043565; GO:0044212; GO:0045449	DNA; nucleus; transcription factor complex; regulation of transcription, DNA; cell differentiation; sequence; transcription regulatory region DNA binding	AT4G38620	ATMYB4; MYB4	myb domain protein 4	myb domain protein 4 myb domain protein 4	Potri.004G138000; Potri.005G112000; Potri.T144800; Potri.011G040300; Potri.004G174400; Potri.010G114000; Potri.009G134000; Potri.008G128500; Potri.006G221800
N1.HOG0000170	N1.HOG0000170_367	complete	0.00421604	Potra2n9c18946	Bpev01.c0639.g0015.m0001	FUN_007778-T1	PA_chr01_G002759	PS_chr01_G001822	PS_chr04_G016676	GO:0003700; GO:0005634; GO:0005667; GO:0006355; GO:0030154; GO:0043565; GO:0044212; GO:0045449	DNA; nucleus; transcription factor complex; regulation of transcription, DNA; cell differentiation; sequence; transcription regulatory region DNA binding	AT4G38620	ATMYB4; MYB4	myb domain protein 4	myb domain protein 4 myb domain protein 4	Potri.004G138000; Potri.005G112000; Potri.T144800; Potri.011G040300; Potri.004G174400; Potri.010G114000; Potri.009G134000; Potri.008G128500; Potri.006G221800
N1.HOG0000170	N1.HOG0000170_545	complete	0.0042214	Potra2n9c18946	Bpev01.c0639.g0015.m0001	FUN_007673-T1	PA_chr04_G002634	PS_chr04_G016676	PS_chr04_G016676	GO:0003700; GO:0005634; GO:0005667; GO:0006355; GO:0030154; GO:0043565; GO:0044212; GO:0045449	DNA; nucleus; transcription factor complex; regulation of transcription, DNA; cell differentiation; sequence; transcription regulatory region DNA binding	AT4G38620	ATMYB4; MYB4	myb domain protein 4	myb domain protein 4 myb domain protein 4	Potri.004G138000; Potri.005G112000; Potri.T144800; Potri.011G040300; Potri.004G174400; Potri.010G114000; Potri.009G134000; Potri.008G128500; Potri.006G221800
N1.HOG0000170	N1.HOG0000170_541	complete	0.0042236	Potra2n9c18946	Bpev01.c0639.g0015.m0001	FUN_007673-T1	PA_chr01_G002759	PS_chr04_G016676	PS_chr04_G016676	GO:0003700; GO:0005634; GO:0005667; GO:0006355; GO:0030154; GO:0043565; GO:0044212; GO:0045449	DNA; nucleus; transcription factor complex; regulation of transcription, DNA; cell differentiation; sequence; transcription regulatory region DNA binding	AT4G38620	ATMYB4; MYB4	myb domain protein 4	myb domain protein 4 myb domain protein 4	Potri.004G138000; Potri.005G112000; Potri.T144800; Potri.011G040300; Potri.004G174400; Potri.010G114000; Potri.009G134000; Potri.008G128500; Potri.006G221800
N1.HOG0000170	N1.HOG0000170_547	complete	0.00422381	Potra2n9c18946	Bpev01.c0639.g0015.m0001	FUN_007673-T1	PA_chr01_G002759	PS_chr01_G001822	PS_chr04_G016676	GO:0003700; GO:0005634; GO:0005667; GO:0006355; GO:0030154; GO:0043565; GO:0044212; GO:0045449	DNA; nucleus; transcription factor complex; regulation of transcription, DNA; cell differentiation; sequence; transcription regulatory region DNA binding	AT4G38620	ATMYB4; MYB4	myb domain protein 4	myb domain protein 4 myb domain protein 4	Potri.004G138000; Potri.005G112000; Potri.T144800; Potri.011G040300; Potri.004G174400; Potri.010G114000; Potri.009G134000; Potri.008G128500; Potri.006G221800
N1.HOG0000170	N1.HOG0000170_339	complete	0.00447449	Potra2n9c18946	Bpev01.c0639.g0015.m0001	FUN_007778-T1	PA_chr01_G002758	PS_chr04_G016676	PS_chr04_G016676	GO:0003700; GO:0005634; GO:0005667; GO:0006355; GO:0030154; GO:0043565; GO:0044212; GO:0045449	DNA; nucleus; transcription factor complex; regulation of transcription, DNA; cell differentiation; sequence; transcription regulatory region DNA binding	AT4G38620	ATMYB4; MYB4	myb domain protein 4	myb domain protein 4 myb domain protein 4	Potri.004G138000; Potri.005G112000; Potri.T144800; Potri.011G040300; Potri.004G174400; Potri.010G114000; Potri.009G134000; Potri.008G128500; Potri.006G221800
N1.HOG0000170	N1.HOG0000170_369	complete	0.00447469	Potra2n9c18946	Bpev01.c0639.g0015.m0001	FUN_007778-T1	PA_chr01_G002758	PS_chr01_G001822	PS_chr04_G016676	GO:0003700; GO:0005634; GO:0005667; GO:0006355; GO:0030154; GO:0043565; GO:0044212; GO:0045449	DNA; nucleus; transcription factor complex; regulation of transcription, DNA; cell differentiation; sequence; transcription regulatory region DNA binding	AT4G38620	ATMYB4; MYB4	myb domain protein 4	myb domain protein 4 myb domain protein 4	Potri.004G138000; Potri.005G112000; Potri.T144800; Potri.011G040300; Potri.004G174400; Potri.010G114000; Potri.009G134000; Potri.008G128500; Potri.006G221800
N1.HOG0000170	N1.HOG0000170_340	complete	0.00448115	Potra2n9c18946	Bpev01.c0639.g0015.m0001	FUN_007778-T1	PA_chr01_G002762	PS_chr04_G016676	PS_chr04_G016676	GO:0003700; GO:0005634; GO:0005667; GO:0006355; GO:0030154; GO:0043565; GO:0044212; GO:0045449	DNA; nucleus; transcription factor complex; regulation of transcription, DNA; cell differentiation; sequence; transcription regulatory region DNA binding	AT4G38620	ATMYB4; MYB4	myb domain protein 4	myb domain protein 4 myb domain protein 4	Potri.004G138000; Potri.005G112000; Potri.T144800; Potri.011G040300; Potri.004G174400; Potri.010G114000; Potri.009G134000; Potri.008G128500; Potri.006G221800
N1.HOG0000170	N1.HOG0000170_370	complete	0.00448135	Potra2n9c18946	Bpev01.c0639.g0015.m0001	FUN_007778-T1	PA_chr01_G002762	PS_chr01_G001822	PS_chr04_G016676	GO:0003700; GO:0005634; GO:0005667; GO:0006355; GO:0030154; GO:0043565; GO:0044212; GO:0045449	DNA; nucleus; transcription factor complex; regulation of transcription, DNA; cell differentiation; sequence; transcription regulatory region DNA binding	AT4G38620	ATMYB4; MYB4	myb domain protein 4	myb domain protein 4 myb domain protein 4	Potri.004G138000; Potri.005G112000; Potri.T144800; Potri.011G040300; Potri.004G174400; Potri.010G114000; Potri.009G134000; Potri.008G128500; Potri.006G221800
N1.HOG0000170	N1.HOG0000170_543	complete	0.00448225	Potra2n9c18946	Bpev01.c0639.g0015.m0001	FUN_007673-T1	PA_chr01_G002758	PS_chr04_G016676	PS_chr04_G016676	GO:0003700; GO:0005634; GO:0005667; GO:0006355; GO:0030154; GO:0043565; GO:0044212; GO:0045449	DNA; nucleus; transcription factor complex; regulation of transcription, DNA; cell differentiation; sequence; transcription regulatory region DNA binding	AT4G38620	ATMYB4; MYB4	myb domain protein 4	myb domain protein 4 myb domain protein 4	Potri.004G138000; Potri.005G112000; Potri.T144800; Potri.011G040300; Potri.004G174400; Potri.010G114000; Potri.009G134000; Potri.008G128500; Potri.006G221800
N1.HOG0000170	N1.HOG0000170_549	complete	0.00448246	Potra2n9c18946	Bpev01.c0639.g0015.m0001	FUN_007673-T1	PA_chr01_G002758	PS_chr01_G001822	PS_chr04_G016676	GO:0003700; GO:0005634; GO:0005667; GO:0006355; GO:0030154; GO:0043565; GO:0044212; GO:0045449	DNA; nucleus; transcription factor complex; regulation of transcription, DNA; cell differentiation; sequence; transcription regulatory region DNA binding	AT4G38620	ATMYB4; MYB4	myb domain protein 4	myb domain protein 4 myb domain protein 4	Potri.004G138000; Potri.005G112000; Potri.T144800; Potri.011G040300; Potri.004G174400; Potri.010G114000; Potri.009G134000; Potri.008G128500; Potri.006G221800
N1.HOG0000170	N1.HOG0000170_544	complete	0.00448892	Potra2n9c18946	Bpev01.c0639.g0015.m0001	FUN_007673-T1	PA_chr01_G002762	PS_chr04_G016676	PS_chr04_G016676	GO:0003700; GO:0005634; GO:0005667; GO:0006355; GO:0030154; GO:0043565; GO:0044212; GO:0045449	DNA; nucleus; transcription factor complex; regulation of transcription, DNA; cell differentiation; sequence; transcription regulatory region DNA binding	AT4G38620	ATMYB4; MYB4	myb domain protein 4	myb domain protein 4 myb domain protein 4	Potri.004G138000; Potri.005G112000; Potri.T144800; Potri.011G040300; Potri.004G174400; Potri.010G114000; Potri.009G134000; Potri.008G128500; Potri.006G221800
N1.HOG0000170	N1.HOG0000170_550	complete	0.00448912	Potra2n9c18946	Bpev01.c0639.g0015.m0001	FUN_007673-T1	PA_chr01_G002762	PS_chr01_G001822	PS_chr04_G016676	GO:0003700; GO:0005634; GO:0005667; GO:0006355; GO:0030154; GO:0043565; GO:0044212; GO:0045449	DNA; nucleus; transcription factor complex; regulation of transcription, DNA; cell differentiation; sequence; transcription regulatory region DNA binding	AT4G38620	ATMYB4; MYB4	myb domain protein 4	myb domain protein 4 myb domain protein 4	Potri.004G138000; Potri.005G112000; Potri.T144800; Potri.011G040300; Potri.004G174400; Potri.010G114000; Potri.009G134000; Potri.008G128500; Potri.006G221800
N1.HOG0000170	N1.HOG0000170_371	complete	0.0050355	Potra2n9c18946	Bpev01.c0639.g0015.m0001	FUN_007778-T1	PA_chr04_G002634	PS_chr01_G001822	PS_chr04_G016676	GO:0003700; GO:0005634; GO:0005667; GO:0006355; GO:0030154; GO:0043565; GO:0044212; GO:0045449	DNA; nucleus; transcription factor complex; regulation of transcription, DNA; cell differentiation; sequence; transcription regulatory region DNA binding	AT4G38620	ATMYB4; MYB4	myb domain protein 4	myb domain protein 4 myb domain protein 4	Potri.004G138000; Potri.005G112000; Potri.T144800; Potri.011G040300; Potri.004G174400; Potri.010G114000; Potri.009G134000; Potri.008G128500; Potri.006G221800
N1.HOG0000170	N1.HOG0000170_551	complete	0.00504327	Potra2n9c18946	Bpev01.c0639.g0015.m0001	FUN_007673-T1	PA_chr04_G002634	PS_chr01_G001822	PS_chr04_G016676	GO:0003700; GO:0005634; GO:0005667; GO:0006355; GO:0030154; GO:0043565; GO:0044212; GO:0045449	DNA; nucleus; transcription factor complex; regulation of transcription, DNA; cell differentiation; sequence; transcription regulatory region DNA binding	AT4G38620	ATMYB4; MYB4	myb domain protein 4	myb domain protein 4 myb domain protein 4	Potri.004G138000; Potri.005G112000; Potri.T144800; Potri.011G040300; Potri.004G174400; Potri.010G114000; Potri.009G134000; Potri.008G128500; Potri.006G221800
N1.HOG0000170	N1.HOG0000170_224	complete	0.00511248	Potra2n9c18946	Bpev01.c0639.g0015.m0001	FUN_030252-T1	PA_chr04_G002634	PS_chr04_G016676	PS_chr01_G001822	GO:0003700; GO:0005634; GO:0005667; GO:0006355; GO:0030154; GO:0043565; GO:0044212; GO:0045449	DNA; nucleus; transcription factor complex; regulation of transcription, DNA; cell differentiation; sequence; transcription regulatory region DNA binding	AT4G38620	ATMYB4; MYB4	myb domain protein 4	myb domain protein 4 myb domain protein 4	Potri.004G138000; Potri.005G112000; Potri.T144800; Potri.011G040300; Potri.004G174400; Potri.010G114000; Potri.009G134000; Potri.008G128500; Potri.006G221800
N1.HOG0000170	N1.HOG0000170_240	complete	0.00511248	Potra2n9c18946	Bpev01.c0549.g0004.m0001	FUN_030252-T1	PA_chr04_G002634	PS_chr04_G016676	PS_chr01_G001822	GO:0003700; GO:0005634; GO:0005667; GO:0006355; GO:0030154; GO:0043565; GO:0044212; GO:0045449	DNA; nucleus; transcription factor complex; regulation of transcription, DNA; cell differentiation; sequence; transcription regulatory region DNA binding	AT4G38620	ATMYB4; MYB4	myb domain protein 4	myb domain protein 4 myb domain protein 4	Potri.004G138000; Potri.005G112000; Potri.T144800; Potri.011G040300; Potri.004G174400; Potri.010G114000; Potri.009G134000; Potri.008G128500; Potri.006G221800
N1.HOG0000170	N1.HOG0000170_223	complete	0.00511254	Potra2n9c18946	Bpev01.c0639.g0015.m0001	FUN_030252-T1	PA_chr04_G002634	PS_chr01_G001818	PS_chr01_G001822	GO:0003700; GO:0005634; GO:0005667; GO:0006355; GO:0030154; GO:0043565; GO:0044212; GO:0045449	DNA; nucleus; transcription factor complex; regulation of transcription, DNA; cell differentiation; sequence; transcription regulatory region DNA binding	AT4G38620	ATMYB4; MYB4	myb domain protein 4	myb domain protein 4 myb domain protein 4	Potri.004G138000; Potri.005G112000; Potri.T144800; Potri.011G040300; Potri.004G174400; Potri.010G114000; Potri.009G134000; Potri.008G128500; Potri.006G221800
N1.HOG0000170	N1.HOG0000170_239	complete	0.00511254	Potra2n9c18946	Bpev01.c0549.g0004.m0001	FUN_030252-T1	PA_chr04_G002634	PS_chr01_G001818	PS_chr01_G001822	GO:0003700; GO:0005634; GO:0005667; GO:0006355; GO:0030154; GO:0043565; GO:0044212; GO:0045449	DNA; nucleus; transcription factor complex; regulation of transcription, DNA; cell differentiation; sequence; transcription regulatory region DNA binding	AT4G38620	ATMYB4; MYB4	myb domain protein 4	myb domain protein 4 myb domain protein 4	Potri.004G138000; Potri.005G112000; Potri.T144800; Potri.011G040300; Potri.004G174400; Potri.010G114000; Potri.009G134000; Potri.008G128500; Potri.006G221800
N1.HOG0000170	N1.HOG0000170_377	complete	0.00511259	Potra2n9c18946	Bpev01.c0549.g0004.m0001	FUN_007778-T1	PA_chr04_G002634	PS_chr04_G016676	PS_chr01_G001822	GO:0003700; GO:0005634; GO:0005667; GO:0006355; GO:0030154; GO:0043565; GO:0044212; GO:0045449	DNA; nucleus; transcription factor complex; regulation of transcription, DNA; cell differentiation; sequence; transcription regulatory region DNA binding	AT4G38620	ATMYB4; MYB4	myb domain protein 4	myb domain protein 4 myb domain protein 4	Potri.004G138000; Potri.005G112000; Potri.T144800; Potri.011G040300; Potri.004G174400; Potri.010G114000; Potri.009G134000; Potri.008G128500; Potri.006G221800
N1.HOG0000170	N1.HOG0000170_329	complete	0.00511261	Potra2n9c18946	Bpev01.c0639.g0015.m0001	FUN_007778-T1	PA_chr04_G002634	PS_chr04_G016676	PS_chr01_G001822	GO:0003700; GO:0005634; GO:0005667; GO:0006355; GO:0030154; GO:0043565; GO:0044212; GO:0045449	DNA; nucleus; transcription factor complex; regulation of transcription, DNA; cell differentiation; sequence; transcription regulatory region DNA binding	AT4G38620	ATMYB4; MYB4	myb domain protein 4	myb domain protein 4 myb domain protein 4	Potri.004G138000; Potri.005G112000; Potri.T144800; Potri.011G040300; Potri.004G174400; Potri.010G114000; Potri.009G134000; Potri.008G128500; Potri.006G221800
N1.HOG0000170	N1.HOG0000170_563	complete	0.00511301	Potra2n9c18946	Bpev01.c0549.g0004.m0001	FUN_007673-T1	PA_chr04_G002634	PS_chr04_G016676	PS_chr01_G001822	GO:0003700; GO:0005634; GO:0005667; GO:0006355; GO:0030154; GO:0043565; GO:0044212; GO:0045449	DNA; nucleus; transcription factor complex; regulation of transcription, DNA; cell differentiation; sequence; transcription regulatory region DNA binding	AT4G38620	ATMYB4; MYB4	myb domain protein 4	myb domain protein 4 myb domain protein 4	Potri.004G138000; Potri.005G112000; Potri.T144800; Potri.011G040300; Potri.004G174400; Potri.010G114000; Potri.009G134000; Potri.008G128500; Potri.006G221800
N1.HOG0000170	N1.HOG0000170_557	complete	0.00511307	Potra2n9c18946	Bpev01.c0549.g0004.m0001	FUN_007673-T1	PA_chr04_G002634	PS_chr01_G001818	PS_chr01_G001822	GO:0003700; GO:0005634; GO:0005667; GO:0006355; GO:0030154; GO:0043565; GO:0044212; GO:0045449	DNA; nucleus; transcription factor complex; regulation of transcription, DNA; cell differentiation; sequence; transcription regulatory region DNA binding	AT4G38620	ATMYB4; MYB4	myb domain protein 4	myb domain protein 4 myb domain protein 4	Potri.004G138000; Potri.005G112000; Potri.T144800; Potri.011G040300; Potri.004G174400; Potri.010G114000; Potri.009G134000; Potri.008G128500; Potri.006G221800
N1.HOG0000170	N1.HOG0000170_503	complete	0.00511313	Potra2n9c18946	Bpev01.c0639.g0015.m0001	FUN_007673-T1	PA_chr04_G002634	PS_chr04_G016676	PS_chr01_G001822	GO:0003700; GO:0005634; GO:0005667; GO:0006355; GO:0030154; GO:0043565; GO:0044212; GO:0045449	DNA; nucleus; transcription factor complex; regulation of transcription, DNA; cell differentiation; sequence; transcription regulatory region DNA binding	AT4G38620	ATMYB4; MYB4	myb domain protein 4	myb domain protein 4 myb domain protein 4	Potri.004G138000; Potri.005G112000; Potri.T144800; Potri.011G040300; Potri.004G174400; Potri.010G114000; Potri.009G134000; Potri.008G128500; Potri.006G221800
N1.HOG0000170	N1.HOG0000170_497	complete	0.00511319	Potra2n9c18946	Bpev01.c0639.g0015.m0001	FUN_007673-T1	PA_chr04_G002634	PS_chr01_G001818	PS_chr01_G001822	GO:0003700; GO:0005634; GO:0005667; GO:0006355; GO:0030154; GO:0043565; GO:0044212; GO:0045449	DNA; nucleus; transcription factor complex; regulation of transcription, DNA; cell differentiation; sequence; transcription regulatory region DNA binding	AT4G38620	ATMYB4; MYB4	myb domain protein 4	myb domain protein 4 myb domain protein 4	Potri.004G138000; Potri.005G112000; Potri.T144800; Potri.011G040300; Potri.004G174400; Potri.010G114000; Potri.009G134000; Potri.008G128500; Potri.006G221800
N1.HOG0000170	N1.HOG0000170_379	complete	0.00511479	Potra2n9c18946	Bpev01.c0549.g0004.m0001	FUN_007778-T1	PA_chr01_G002759	PS_chr01_G001824	PS_chr01_G001822	GO:0003700; GO:0005634; GO:0005667; GO:0006355; GO:0030154; GO:0043565; GO:0044212; GO:0045449	DNA; nucleus; transcription factor complex; regulation of transcription, DNA; cell differentiation; sequence; transcription regulatory region DNA binding	AT4G38620	ATMYB4; MYB4	myb domain protein 4	myb domain protein 4 myb domain protein 4	Potri.004G138000; Potri.005G112000; Potri.T144800; Potri.011G040300; Potri.004G174400; Potri.010G114000; Potri.009G134000; Potri.008G128500; Potri.006G221800
N1.HOG0000170	N1.HOG0000170_373	complete	0.00511479	Potra2n9c18946	Bpev01.c0549.g0004.m0001	FUN_007778-T1	PA_chr01_G002759	PS_chr04_G016676	PS_chr01_G001822	GO:0003700; GO:0005634; GO:0005667; GO:0006355; GO:0030154; GO:0043565; GO:0044212; GO:0045449	DNA; nucleus; transcription factor complex; regulation of transcription, DNA; cell differentiation; sequence; transcription regulatory region DNA binding	AT4G38620	ATMYB4; MYB4	myb domain protein 4	myb domain protein 4 myb domain protein 4	Potri.004G138000; Potri.005G112000; Potri.T144800; Potri.011G040300; Potri.004G174400; Potri.010G114000; Potri.009G134000; Potri.008G128500; Potri.006G221800
N1.HOG0000170	N1.HOG0000170_325	complete	0.00511481	Potra2n9c18946	Bpev01.c0639.g0015.m0001	FUN_007778-T1	PA_chr01_G002759	PS_chr04_G016676	PS_chr01_G001822	GO:0003700; GO:0005634; GO:0005667; GO:0006355; GO:0030154; GO:0043565; GO:0044212; GO:0045449	DNA; nucleus; transcription factor complex; regulation of transcription, DNA; cell differentiation; sequence; transcription regulatory region DNA binding	AT4G38620	ATMYB4; MYB4	myb domain protein 4	myb domain protein 4 myb domain protein 4	Potri.004G138000; Potri.005G112000; Potri.T144800; Potri.011G040300; Potri.004G174400; Potri.010G114000; Potri.009G134000; Potri.008G128500; Potri.006G221800
N1.HOG0000170	N1.HOG0000170_343	complete	0.00511481	Potra2n9c18946	Bpev01.c0639.g0015.m0001	FUN_007778-T1	PA_chr01_G002759	PS_chr01_G001824	PS_chr01_G001822	GO:0003700; GO:0005634; GO:0005667; GO:0006355; GO:0030154; GO:0043565; GO:0044212; GO:0045449	DNA; nucleus; transcription factor complex; regulation of transcription, DNA; cell differentiation; sequence; transcription regulatory region DNA binding	AT4G38620	ATMYB4; MYB4	myb domain protein 4	myb domain protein 4 myb domain protein 4	Potri.004G138000; Potri.005G112000; Potri.T144800; Potri.011G040300; Potri.004G174400; Potri.010G114000; Potri.009G134000; Potri.008G128500; Potri.006G221800
N1.HOG0000170	N1.HOG0000170_355	complete	0.00511501	Potra2n9c18946	Bpev01.c0639.g0015.m0001	FUN_007778-T1	PA_chr01_G002759	PS_chr01_G001822	PS_chr01_G001822	GO:0003700; GO:0005634; GO:0005667; GO:0006355; GO:0030154; GO:0043565; GO:0044212; GO:0045449	DNA; nucleus; transcription factor complex; regulation of transcription, DNA; cell differentiation; sequence; transcription regulatory region DNA binding	AT4G38620	ATMYB4; MYB4	myb domain protein 4	myb domain protein 4 myb domain protein 4	Potri.004G138000; Potri.005G112000; Potri.T144800; Potri.011G040300; Potri.004G174400; Potri.010G114000; Potri.009G134000; Potri.008G128500; Potri.006G221800
N1.HOG0000170	N1.HOG0000170_553	complete	0.00511521	Potra2n9c18946	Bpev01.c0549.g0004.m0001	FUN_007673-T1	PA_chr01_G002759	PS_chr01_G001818	PS_chr01_G001822	GO:0003700; GO:0005634; GO:0005667; GO:0006355; GO:0030154; GO:0043565; GO:0044212; GO:0045449	DNA; nucleus; transcription factor complex; regulation of transcription, DNA; cell differentiation; sequence; transcription regulatory region DNA binding	AT4G38620	ATMYB4; MYB4	myb domain protein 4	myb domain protein 4 myb domain protein 4	Potri.004G138000; Potri.005G112000; Potri.T144800; Potri.011G040300; Potri.004G174400; Potri.010G114000; Potri.009G134000; Potri.008G128500; Potri.006G221800
N1.HOG0000170	N1.HOG0000170_565	complete	0.00511521	Potra2n9c18946	Bpev01.c0549.g0004.m0001	FUN_007673-T1	PA_chr01_G002759	PS_chr01_G001824	PS_chr01_G001822	GO:0003700; GO:0005634; GO:0005667; GO:0006355; GO:0030154; GO:0043565; GO:0044212; GO:0045449	DNA; nucleus; transcription factor complex; regulation of transcription, DNA; cell differentiation; sequence; transcription regulatory region DNA binding	AT4G38620	ATMYB4; MYB4	myb domain protein 4	myb domain protein 4 myb domain protein 4	Potri.004G138000; Potri.005G112000; Potri.T144800; Potri.011G040300; Potri.004G174400; Potri.010G114000; Potri.009G134000; Potri.008G128500; Potri.006G221800
N1.HOG0000170	N1.HOG0000170_559	complete	0.00511521	Potra2n9c18946	Bpev01.c0549.g0004.m0001	FUN_007673-T1	PA_chr01_G002759	PS_chr04_G016676	PS_chr01_G001822	GO:0003700; GO:0005634; GO:0005667; GO:0006355; GO:0030154; GO:0043565; GO:0044212; GO:0045449	DNA; nucleus; transcription factor complex; regulation of transcription, DNA; cell differentiation; sequence; transcription regulatory region DNA binding	AT4G38620	ATMYB4; MYB4	myb domain protein 4	myb domain protein 4 myb domain protein 4	Potri.004G138000; Potri.005G112000; Potri.T144800; Potri.011G040300; Potri.004G174400; Potri.010G114000; Potri.009G134000; Potri.008G128500; Potri.006G221800
N1.HOG0000170	N1.HOG0000170_499	complete	0.00511533	Potra2n9c18946	Bpev01.c0639.g0015.m0001	FUN_007673-T1	PA_chr01_G002759	PS_chr04_G016676	PS_chr01_G001822	GO:0003700; GO:0005634; GO:0005667; GO:0006355; GO:0030154; GO:0043565; GO:0044212; GO:0045449	DNA; nucleus; transcription factor complex; regulation of transcription, DNA; cell differentiation; sequence; transcription regulatory region DNA binding	AT4G38620	ATMYB4; MYB4	myb domain protein 4	myb domain protein 4 myb domain protein 4	Potri.004G138000; Potri.005G112000; Potri.T144800; Potri.011G040300; Potri.004G174400; Potri.010G114000; Potri.009G134000; Potri.008G128500; Potri.006G221800
N1.HOG0000170	N1.HOG0000170_493	complete	0.00511533	Potra2n9c18946	Bpev01.c0639.g0015.m0001	FUN_007673-T1	PA_chr01_G002759	PS_chr01_G001818	PS_chr01_G001822	GO:0003700; GO:0005634; GO:0005667; GO:0006355; GO:0030154; GO:0043565; GO:0044212; GO:0045449	DNA; nucleus; transcription factor complex; regulation of transcription, DNA; cell differentiation; sequence; transcription regulatory region DNA binding	AT4G38620	ATMYB4; MYB4	myb domain protein 4	myb domain protein 4 myb domain protein 4	Potri.004G138000; Potri.005G112000; Potri.T144800; Potri.011G040300; Potri.004G174400; Potri.010G114000; Potri.009G134000; Potri.008G128500; Potri.006G221800
N1.HOG0000170	N1.HOG0000170_505	complete	0.00511533	Potra2n9c18946	Bpev01.c0639.g0015.m0001	FUN_007673-T1	PA_chr01_G002759	PS_chr01_G001824	PS_chr01_G001822	GO:0003700; GO:0005634; GO:0005667; GO:0006355; GO:0030154; GO:0043565; GO:0044212; GO:0045449	DNA; nucleus; transcription factor complex; regulation of transcription, DNA; cell differentiation; sequence; transcription regulatory region DNA binding	AT4G38620	ATMYB4; MYB4	myb domain protein 4	myb domain protein 4 myb domain protein 4	Potri.004G138000; Potri.005G112000; Potri.T144800; Potri.011G040300; Potri.004G174400; Potri.010G114000; Potri.009G134000; Potri.008G128500; Potri.006G221800
N1.HOG0000170	N1.HOG0000170_511	complete	0.00511553	Potra2n9c18946	Bpev01.c0639.g0015.m0001	FUN_007673-T1	PA_chr01_G002759	PS_chr01_G001822	PS_chr01_G001822	GO:0003700; GO:0005634; GO:0005667; GO:0006355; GO:0030154; GO:0043565; GO:0044212; GO:0045449	DNA; nucleus; transcription factor complex; regulation of transcription, DNA; cell differentiation; sequence; transcription regulatory region DNA binding	AT4G38620	ATMYB4; MYB4	myb domain protein 4	myb domain protein 4 myb domain protein 4	Potri.004G138000; Potri.005G112000; Potri.T144800; Potri.011G040300; Potri.004G174400; Potri.010G114000; Potri.009G134000; Potri.008G128500; Potri.006G221800
N1.HOG0000170	N1.HOG0000170_385	complete	0.00511625	Potra2n9c18946	Bpev01.c0549.g0004.m0001	FUN_007778-T1	PA_chr01_G002759	PS_chr01_G001822	PS_chr01_G001822	GO:0003700; GO:0005634; GO:0005667; GO:0006355; GO:0030154; GO:0043565; GO:0044212; GO:0045449	DNA; nucleus; transcription factor complex; regulation of transcription, DNA; cell differentiation; sequence; transcription regulatory region DNA binding	AT4G38620	ATMYB4; MYB4	myb domain protein 4	myb domain protein 4 myb domain protein 4	Potri.004G138000; Potri.005G112000; Potri.T144800; Potri.011G040300; Potri.004G174400; Potri.010G114000; Potri.009G134000; Potri.008G128500; Potri.006G221800
N1.HOG0000170	N1.HOG0000170_571	complete	0.00511667	Potra2n9c18946	Bpev01.c0549.g0004.m0001	FUN_007673-T1	PA_chr01_G002759	PS_chr01_G001822	PS_chr01_G001822	GO:0003700; GO:0005634; GO:0005667; GO:0006355; GO:0030154; GO:0043565; GO:0044212; GO:0045449	DNA; nucleus; transcription factor complex; regulation of transcription, DNA; cell differentiation; sequence; transcription regulatory region DNA binding	AT4G38620	ATMYB4; MYB4	myb domain protein 4	myb domain protein 4 myb domain protein 4	Potri.004G138000; Potri.005G112000; Potri.T144800; Potri.011G040300; Potri.004G174400; Potri.010G114000; Potri.009G134000; Potri.008G128500; Potri.006G221800
N1.HOG0000170	N1.HOG0000170_231	complete	0.00516582	Potra2n9c18946	Bpev01.c0639.g0015.m0001	FUN_030252-T1	PA_chr04_G002634	PS_chr04_G016676	PS_chr04_G016676	GO:0003700; GO:0005634; GO:0005667; GO:0006355; GO:0030154; GO:0043565; GO:0044212; GO:0045449	DNA; nucleus; transcription factor complex; regulation of transcription, DNA; cell differentiation; sequence; transcription regulatory region DNA binding	AT4G38620	ATMYB4; MYB4	myb domain protein 4	myb domain protein 4 myb domain protein 4	Potri.004G138000; Potri.005G112000; Potri.T144800; Potri.011G040300; Potri.004G174400; Potri.010G114000; Potri.009G134000; Potri.008G128500; Potri.006G221800
N1.HOG0000170	N1.HOG0000170_338	complete	0.00516782	Potra2n9c18946	Bpev01.c0639.g0015.m0001	FUN_007778-T1	PA_chr01_G002769	PS_chr04_G016676	PS_chr04_G016676	GO:0003700; GO:0005634; GO:0005667; GO:0006355; GO:0030154; GO:0043565; GO:0044212; GO:0045449	DNA; nucleus; transcription factor complex; regulation of transcription, DNA; cell differentiation; sequence; transcription regulatory region DNA binding	AT4G38620	ATMYB4; MYB4	myb domain protein 4	myb domain protein 4 myb domain protein 4	Potri.004G138000; Potri.005G112000; Potri.T144800; Potri.011G040300; Potri.004G174400; Potri.010G114000; Potri.009G134000; Potri.008G128500; Potri.006G221800
N1.HOG0000170	N1.HOG0000170_368	complete	0.00516802	Potra2n9c18946	Bpev01.c0639.g0015.m0001	FUN_007778-T1	PA_chr01_G002769	PS_chr01_G001822	PS_chr04_G016676	GO:0003700; GO:0005634; GO:0005667; GO:0006355; GO:0030154; GO:0043565; GO:0044212; GO:0045449	DNA; nucleus; transcription factor complex; regulation of transcription, DNA; cell differentiation; sequence; transcription regulatory region DNA binding	AT4G38620	ATMYB4; MYB4	myb domain protein 4	myb domain protein 4 myb domain protein 4	Potri.004G138000; Potri.005G112000; Potri.T144800; Potri.011G040300; Potri.004G174400; Potri.010G114000; Potri.009G134000; Potri.008G128500; Potri.006G221800
N1.HOG0000170	N1.HOG0000170_542	complete	0.00517559	Potra2n9c18946	Bpev01.c0639.g0015.m0001	FUN_007673-T1	PA_chr01_G002769	PS_chr04_G016676	PS_chr04_G016676	GO:0003700; GO:0005634; GO:0005667; GO:0006355; GO:0030154; GO:0043565; GO:0044212; GO:0045449	DNA; nucleus; transcription factor complex; regulation of transcription, DNA; cell differentiation; sequence; transcription regulatory region DNA binding	AT4G38620	ATMYB4; MYB4	myb domain protein 4	myb domain protein 4 myb domain protein 4	Potri.004G138000; Potri.005G112000; Potri.T144800; Potri.011G040300; Potri.004G174400; Potri.010G114000; Potri.009G134000; Potri.008G128500; Potri.006G221800
N1.HOG0000170	N1.HOG0000170_548	complete	0.00517579	Potra2n9c18946	Bpev01.c0639.g0015.m0001	FUN_007673-T1	PA_chr01_G002769	PS_chr01_G001822	PS_chr04_G016676	GO:0003700; GO:0005634; GO:0005667; GO:0006355; GO:0030154; GO:0043565; GO:0044212; GO:0045449	DNA; nucleus; transcription factor complex; regulation of transcription, DNA; cell differentiation; sequence; transcription regulatory region DNA binding	AT4G38620	ATMYB4; MYB4	myb domain protein 4	myb domain protein 4 myb domain protein 4	Potri.004G138000; Potri.005G112000; Potri.T144800; Potri.011G040300; Potri.004G174400; Potri.010G114000; Potri.009G134000; Potri.008G128500; Potri.006G221800
N1.HOG0000170	N1.HOG0000170_375	complete	0.00537344	Potra2n9c18946	Bpev01.c0549.g0004.m0001	FUN_007778-T1	PA_chr01_G002758	PS_chr04_G016676	PS_chr01_G001822	GO:0003700; GO:0005634; GO:0005667; GO:0006355; GO:0030154; GO:0043565; GO:0044212; GO:0045449	DNA; nucleus; transcription factor complex; regulation of transcription, DNA; cell differentiation; sequence; transcription regulatory region DNA binding	AT4G38620	ATMYB4; MYB4	myb domain protein 4	myb domain protein 4 myb domain protein 4	Potri.004G138000; Potri.005G112000; Potri.T144800; Potri.011G040300; Potri.004G174400; Potri.010G114000; Potri.009G134000; Potri.008G128500; Potri.006G221800
N1.HOG0000170	N1.HOG0000170_381	complete	0.00537344	Potra2n9c18946	Bpev01.c0549.g0004.m0001	FUN_007778-T1	PA_chr01_G002758	PS_chr01_G001824	PS_chr01_G001822	GO:0003700; GO:0005634; GO:0005667; GO:0006355; GO:0030154; GO:0043565; GO:0044212; GO:0045449	DNA; nucleus; transcription factor complex; regulation of transcription, DNA; cell differentiation; sequence; transcription regulatory region DNA binding	AT4G38620	ATMYB4; MYB4	myb domain protein 4	myb domain protein 4 myb domain protein 4	Potri.004G138000; Potri.005G112000; Potri.T144800; Potri.011G040300; Potri.004G174400; Potri.010G114000; Potri.009G134000; Potri.008G128500; Potri.006G221800
N1.HOG0000170	N1.HOG0000170_327	complete	0.00537346	Potra2n9c18946	Bpev01.c0639.g0015.m0001	FUN_007778-T1	PA_chr01_G002758	PS_chr04_G016676	PS_chr01_G001822	GO:0003700; GO:0005634; GO:0005667; GO:0006355; GO:0030154; GO:0043565; GO:0044212; GO:0045449	DNA; nucleus; transcription factor complex; regulation of transcription, DNA; cell differentiation; sequence; transcription regulatory region DNA binding	AT4G38620	ATMYB4; MYB4	myb domain protein 4	myb domain protein 4 myb domain protein 4	Potri.004G138000; Potri.005G112000; Potri.T144800; Potri.011G040300; Potri.004G174400; Potri.010G114000; Potri.009G134000; Potri.008G128500; Potri.006G221800
N1.HOG0000170	N1.HOG0000170_345	complete	0.00537346	Potra2n9c18946	Bpev01.c0639.g0015.m0001	FUN_007778-T1	PA_chr01_G002758	PS_chr01_G001824	PS_chr01_G001822	GO:0003700; GO:0005634; GO:0005667; GO:0006355; GO:0030154; GO:0043565; GO:0044212; GO:0045449	DNA; nucleus; transcription factor complex; regulation of transcription, DNA; cell differentiation; sequence; transcription regulatory region DNA binding	AT4G38620	ATMYB4; MYB4	myb domain protein 4	myb domain protein 4 myb domain protein 4	Potri.004G138000; Potri.005G112000; Potri.T144800; Potri.011G040300; Potri.004G174400; Potri.010G114000; Potri.009G134000; Potri.008G128500; Potri.006G221800
N1.HOG0000170	N1.HOG0000170_357	complete	0.00537366	Potra2n9c18946	Bpev01.c0639.g0015.m0001	FUN_007778-T1	PA_chr01_G002758	PS_chr01_G001822	PS_chr01_G001822	GO:0003700; GO:0005634; GO:0005667; GO:0006355; GO:0030154; GO:0043565; GO:0044212; GO:0045449	DNA; nucleus; transcription factor complex; regulation of transcription, DNA; cell differentiation; sequence; transcription regulatory region DNA binding	AT4G38620	ATMYB4; MYB4	myb domain protein 4	myb domain protein 4 myb domain protein 4	Potri.004G138000; Potri.005G112000; Potri.T144800; Potri.011G040300; Potri.004G174400; Potri.010G114000; Potri.009G134000; Potri.008G128500; Potri.006G221800
N1.HOG0000170	N1.HOG0000170_561	complete	0.00537386	Potra2n9c18946	Bpev01.c0549.g0004.m0001	FUN_007673-T1	PA_chr01_G002758	PS_chr04_G016676	PS_chr01_G001822	GO:0003700; GO:0005634; GO:0005667; GO:0006355; GO:0030154; GO:0043565; GO:0044212; GO:0045449	DNA; nucleus; transcription factor complex; regulation of transcription, DNA; cell differentiation; sequence; transcription regulatory region DNA binding	AT4G38620	ATMYB4; MYB4	myb domain protein 4	myb domain protein 4 myb domain protein 4	Potri.004G138000; Potri.005G112000; Potri.T144800; Potri.011G040300; Potri.004G174400; Potri.010G114000; Potri.009G134000; Potri.008G128500; Potri.006G221800
N1.HOG0000170	N1.HOG0000170_567	complete	0.00537386	Potra2n9c18946	Bpev01.c0549.g0004.m0001	FUN_007673-T1	PA_chr01_G002758	PS_chr01_G001824	PS_chr01_G001822	GO:0003700; GO:0005634; GO:0005667; GO:0006355; GO:0030154; GO:0043565; GO:0044212; GO:0045449	DNA; nucleus; transcription factor complex; regulation of transcription, DNA; cell differentiation; sequence; transcription regulatory region DNA binding	AT4G38620	ATMYB4; MYB4	myb domain protein 4	myb domain protein 4 myb domain protein 4	Potri.004G138000; Potri.005G112000; Potri.T144800; Potri.011G040300; Potri.004G174400; Potri.010G114000; Potri.009G134000; Potri.008G128500; Potri.006G221800
N1.HOG0000170	N1.HOG0000170_555	complete	0.00537386	Potra2n9c18946	Bpev01.c0549.g0004.m0001	FUN_007673-T1	PA_chr01_G002758	PS_chr01_G001818	PS_chr01_G001822	GO:0003700; GO:0005634; GO:0005667; GO:0006355; GO:0030154; GO:0043565; GO:0044212; GO:0045449	DNA; nucleus; transcription factor complex; regulation of transcription, DNA; cell differentiation; sequence; transcription regulatory region DNA binding	AT4G38620	ATMYB4; MYB4	myb domain protein 4	myb domain protein 4 myb domain protein 4	Potri.004G138000; Potri.005G112000; Potri.T144800; Potri.011G040300; Potri.004G174400; Potri.010G114000; Potri.009G134000; Potri.008G128500; Potri.006G221800
N1.HOG0000170	N1.HOG0000170_501	complete	0.00537398	Potra2n9c18946	Bpev01.c0639.g0015.m0001	FUN_007673-T1	PA_chr01_G002758	PS_chr04_G016676	PS_chr01_G001822	GO:0003700; GO:0005634; GO:0005667; GO:0006355; GO:0030154; GO:0043565; GO:0044212; GO:0045449	DNA; nucleus; transcription factor complex; regulation of transcription, DNA; cell differentiation; sequence; transcription regulatory region DNA binding	AT4G38620	ATMYB4; MYB4	myb domain protein 4	myb domain protein 4 myb domain protein 4	Potri.004G138000; Potri.005G112000; Potri.T144800; Potri.011G040300; Potri.004G174400; Potri.010G114000; Potri.009G134000; Potri.008G128500; Potri.006G221800
N1.HOG0000170	N1.HOG0000170_507	complete	0.00537398	Potra2n9c18946	Bpev01.c0639.g0015.m0001	FUN_007673-T1	PA_chr01_G002758	PS_chr01_G001824	PS_chr01_G001822	GO:0003700; GO:0005634; GO:0005667; GO:0006355; GO:0030154; GO:0043565; GO:0044212; GO:0045449	DNA; nucleus; transcription factor complex; regulation of transcription, DNA; cell differentiation; sequence; transcription regulatory region DNA binding	AT4G38620	ATMYB4; MYB4	myb domain protein 4	myb domain protein 4 myb domain protein 4	Potri.004G138000; Potri.005G112000; Potri.T144800; Potri.011G040300; Potri.004G174400; Potri.010G114000; Potri.009G134000; Potri.008G128500; Potri.006G221800
N1.HOG0000170	N1.HOG0000170_495	complete	0.00537398	Potra2n9c18946	Bpev01.c0639.g0015.m0001	FUN_007673-T1	PA_chr01_G002758	PS_chr01_G001818	PS_chr01_G001822	GO:0003700; GO:0005634; GO:0005667; GO:0006355; GO:0030154; GO:0043565; GO:0044212; GO:0045449	DNA; nucleus; transcription factor complex; regulation of transcription, DNA; cell differentiation; sequence; transcription regulatory region DNA binding	AT4G38620	ATMYB4; MYB4	myb domain protein 4	myb domain protein 4 myb domain protein 4	Potri.004G138000; Potri.005G112000; Potri.T144800; Potri.011G040300; Potri.004G174400; Potri.010G114000; Potri.009G134000; Potri.008G128500; Potri.006G221800
N1.HOG0000170	N1.HOG0000170_513	complete	0.00537418	Potra2n9c18946	Bpev01.c0639.g0015.m0001	FUN_007673-T1	PA_chr01_G002758	PS_chr01_G001822	PS_chr01_G001822	GO:0003700; GO:0005634; GO:0005667; GO:0006355; GO:0030154; GO:0043565; GO:0044212; GO:0045449	DNA; nucleus; transcription factor complex; regulation of transcription, DNA; cell differentiation; sequence; transcription regulatory region DNA binding	AT4G38620	ATMYB4; MYB4	myb domain protein 4	myb domain protein 4 myb domain protein 4	Potri.004G138000; Potri.005G112000; Potri.T144800; Potri.011G040300; Potri.004G174400; Potri.010G114000; Potri.009G134000; Potri.008G128500; Potri.006G221800
N1.HOG0000170	N1.HOG0000170_387	complete	0.0053749	Potra2n9c18946	Bpev01.c0549.g0004.m0001	FUN_007778-T1	PA_chr01_G002758	PS_chr01_G001822	PS_chr01_G001822	GO:0003700; GO:0005634; GO:0005667; GO:0006355; GO:0030154; GO:0043565; GO:0044212; GO:0045449	DNA; nucleus; transcription factor complex; regulation of transcription, DNA; cell differentiation; sequence; transcription regulatory region DNA binding	AT4G38620	ATMYB4; MYB4	myb domain protein 4	myb domain protein 4 myb domain protein 4	Potri.004G138000; Potri.005G112000; Potri.T144800; Potri.011G040300; Potri.004G174400; Potri.010G114000; Potri.009G134000; Potri.008G128500; Potri.006G221800
N1.HOG0000170	N1.HOG0000170_573	complete	0.00537532	Potra2n9c18946	Bpev01.c0549.g0004.m0001	FUN_007673-T1	PA_chr01_G002758	PS_chr01_G001822	PS_chr01_G001822	GO:0003700; GO:0005634; GO:0005667; GO:0006355; GO:0030154; GO:0043565; GO:0044212; GO:0045449	DNA; nucleus; transcription factor complex; regulation of transcription, DNA; cell differentiation; sequence; transcription regulatory region DNA binding	AT4G38620	ATMYB4; MYB4	myb domain protein 4	myb domain protein 4 myb domain protein 4	Potri.004G138000; Potri.005G112000; Potri.T144800; Potri.011G040300; Potri.004G174400; Potri.010G114000; Potri.009G134000; Potri.008G128500; Potri.006G221800
N1.HOG0000170	N1.HOG0000170_382	complete	0.00538011	Potra2n9c18946	Bpev01.c0549.g0004.m0001	FUN_007778-T1	PA_chr01_G002762	PS_chr01_G001824	PS_chr01_G001822	GO:0003700; GO:0005634; GO:0005667; GO:0006355; GO:0030154; GO:0043565; GO:0044212; GO:0045449	DNA; nucleus; transcription factor complex; regulation of transcription, DNA; cell differentiation; sequence; transcription regulatory region DNA binding	AT4G38620	ATMYB4; MYB4	myb domain protein 4	myb domain protein 4 myb domain protein 4	Potri.004G138000; Potri.005G112000; Potri.T144800; Potri.011G040300; Potri.004G174400; Potri.010G114000; Potri.009G134000; Potri.008G128500; Potri.006G221800
N1.HOG0000170	N1.HOG0000170_376	complete	0.00538011	Potra2n9c18946	Bpev01.c0549.g0004.m0001	FUN_007778-T1	PA_chr01_G002762	PS_chr04_G016676	PS_chr01_G001822	GO:0003700; GO:0005634; GO:0005667; GO:0006355; GO:0030154; GO:0043565; GO:0044212; GO:0045449	DNA; nucleus; transcription factor complex; regulation of transcription, DNA; cell differentiation; sequence; transcription regulatory region DNA binding	AT4G38620	ATMYB4; MYB4	myb domain protein 4	myb domain protein 4 myb domain protein 4	Potri.004G138000; Potri.005G112000; Potri.T144800; Potri.011G040300; Potri.004G174400; Potri.010G114000; Potri.009G134000; Potri.008G128500; Potri.006G221800
N1.HOG0000170	N1.HOG0000170_328	complete	0.00538013	Potra2n9c18946	Bpev01.c0639.g0015.m0001	FUN_007778-T1	PA_chr01_G002762	PS_chr04_G016676	PS_chr01_G001822	GO:0003700; GO:0005634; GO:0005667; GO:0006355; GO:0030154; GO:0043565; GO:0044212; GO:0045449	DNA; nucleus; transcription factor complex; regulation of transcription, DNA; cell differentiation; sequence; transcription regulatory region DNA binding	AT4G38620	ATMYB4; MYB4	myb domain protein 4	myb domain protein 4 myb domain protein 4	Potri.004G138000; Potri.005G112000; Potri.T144800; Potri.011G040300; Potri.004G174400; Potri.010G114000; Potri.009G134000; Potri.008G128500; Potri.006G221800
N1.HOG0000170	N1.HOG0000170_346	complete	0.00538013	Potra2n9c18946	Bpev01.c0639.g0015.m0001	FUN_007778-T1	PA_chr01_G002762	PS_chr01_G001824	PS_chr01_G001822	GO:0003700; GO:0005634; GO:0005667; GO:0006355; GO:0030154; GO:0043565; GO:0044212; GO:0045449	DNA; nucleus; transcription factor complex; regulation of transcription, DNA; cell differentiation; sequence; transcription regulatory region DNA binding	AT4G38620	ATMYB4; MYB4	myb domain protein 4	myb domain protein 4 myb domain protein 4	Potri.004G138000; Potri.005G112000; Potri.T144800; Potri.011G040300; Potri.004G174400; Potri.010G114000; Potri.009G134000; Potri.008G128500; Potri.006G221800
N1.HOG0000170	N1.HOG0000170_358	complete	0.00538033	Potra2n9c18946	Bpev01.c0639.g0015.m0001	FUN_007778-T1	PA_chr01_G002762	PS_chr01_G001822	PS_chr01_G001822	GO:0003700; GO:0005634; GO:0005667; GO:0006355; GO:0030154; GO:0043565; GO:0044212; GO:0045449	DNA; nucleus; transcription factor complex; regulation of transcription, DNA; cell differentiation; sequence; transcription regulatory region DNA binding	AT4G38620	ATMYB4; MYB4	myb domain protein 4	myb domain protein 4 myb domain protein 4	Potri.004G138000; Potri.005G112000; Potri.T144800; Potri.011G040300; Potri.004G174400; Potri.010G114000; Potri.009G134000; Potri.008G128500; Potri.006G221800
N1.HOG0000170	N1.HOG0000170_556	complete	0.00538053	Potra2n9c18946	Bpev01.c0549.g0004.m0001	FUN_007673-T1	PA_chr01_G002762	PS_chr01_G001818	PS_chr01_G001822	GO:0003700; GO:0005634; GO:0005667; GO:0006355; GO:0030154; GO:0043565; GO:0044212; GO:0045449	DNA; nucleus; transcription factor complex; regulation of transcription, DNA; cell differentiation; sequence; transcription regulatory region DNA binding	AT4G38620	ATMYB4; MYB4	myb domain protein 4	myb domain protein 4 myb domain protein 4	Potri.004G138000; Potri.005G112000; Potri.T144800; Potri.011G040300; Potri.004G174400; Potri.010G114000; Potri.009G134000; Potri.008G128500; Potri.006G221800
N1.HOG0000170	N1.HOG0000170_568	complete	0.00538053	Potra2n9c18946	Bpev01.c0549.g0004.m0001	FUN_007673-T1	PA_chr01_G002762	PS_chr01_G001824	PS_chr01_G001822	GO:0003700; GO:0005634; GO:0005667; GO:0006355; GO:0030154; GO:0043565; GO:0044212; GO:0045449	DNA; nucleus; transcription factor complex; regulation of transcription, DNA; cell differentiation; sequence; transcription regulatory region DNA binding	AT4G38620	ATMYB4; MYB4	myb domain protein 4	myb domain protein 4 myb domain protein 4	Potri.004G138000; Potri.005G112000; Potri.T144800; Potri.011G040300; Potri.004G174400; Potri.010G114000; Potri.009G134000; Potri.008G128500; Potri.006G221800
N1.HOG0000170	N1.HOG0000170_562	complete	0.00538053	Potra2n9c18946	Bpev01.c0549.g0004.m0001	FUN_007673-T1	PA_chr01_G002762	PS_chr04_G016676	PS_chr01_G001822	GO:0003700; GO:0005634; GO:0005667; GO:0006355; GO:0030154; GO:0043565; GO:0044212; GO:0045449	DNA; nucleus; transcription factor complex; regulation of transcription, DNA; cell differentiation; sequence; transcription regulatory region DNA binding	AT4G38620	ATMYB4; MYB4	myb domain protein 4	myb domain protein 4 myb domain protein 4	Potri.004G138000; Potri.005G112000; Potri.T144800; Potri.011G040300; Potri.004G174400; Potri.010G114000; Potri.009G134000; Potri.008G128500; Potri.006G221800
N1.HOG0000170	N1.HOG0000170_502	complete	0.00538065	Potra2n9c18946	Bpev01.c0639.g0015.m0001	FUN_007673-T1	PA_chr01_G002762	PS_chr04_G016676	PS_chr01_G001822	GO:0003700; GO:0005634; GO:0005667; GO:0006355; GO:0030154; GO:0043565; GO:0044212; GO:0045449	DNA; nucleus; transcription factor complex; regulation of transcription, DNA; cell differentiation; sequence; transcription regulatory region DNA binding	AT4G38620	ATMYB4; MYB4	myb domain protein 4	myb domain protein 4 myb domain protein 4	Potri.004G138000; Potri.005G112000; Potri.T144800; Potri.011G040300; Potri.004G174400; Potri.010G114000; Potri.009G134000; Potri.008G128500; Potri.006G221800
N1.HOG0000170	N1.HOG0000170_496	complete	0.00538065	Potra2n9c18946	Bpev01.c0639.g0015.m0001	FUN_007673-T1	PA_chr01_G002762	PS_chr01_G001818	PS_chr01_G001822	GO:0003700; GO:0005634; GO:0005667; GO:0006355; GO:0030154; GO:0043565; GO:0044212; GO:0045449	DNA; nucleus; transcription factor complex; regulation of transcription, DNA; cell differentiation; sequence; transcription regulatory region DNA binding	AT4G38620	ATMYB4; MYB4	myb domain protein 4	myb domain protein 4 myb domain protein 4	Potri.004G138000; Potri.005G112000; Potri.T144800; Potri.011G040300; Potri.004G174400; Potri.010G114000; Potri.009G134000; Potri.008G128500; Potri.006G221800
N1.HOG0000170	N1.HOG0000170_508	complete	0.00538065	Potra2n9c18946	Bpev01.c0639.g0015.m0001	FUN_007673-T1	PA_chr01_G002762	PS_chr01_G001824	PS_chr01_G001822	GO:0003700; GO:0005634; GO:0005667; GO:0006355; GO:0030154; GO:0043565; GO:0044212; GO:0045449	DNA; nucleus; transcription factor complex; regulation of transcription, DNA; cell differentiation; sequence; transcription regulatory region DNA binding	AT4G38620	ATMYB4; MYB4	myb domain protein 4	myb domain protein 4 myb domain protein 4	Potri.004G138000; Potri.005G112000; Potri.T144800; Potri.011G040300; Potri.004G174400; Potri.010G114000; Potri.009G134000; Potri.008G128500; Potri.006G221800
N1.HOG0000170	N1.HOG0000170_514	complete	0.00538085	Potra2n9c18946	Bpev01.c0639.g0015.m0001	FUN_007673-T1	PA_chr01_G002762	PS_chr01_G001822	PS_chr01_G001822	GO:0003700; GO:0005634; GO:0005667; GO:0006355; GO:0030154; GO:0043565; GO:0044212; GO:0045449	DNA; nucleus; transcription factor complex; regulation of transcription, DNA; cell differentiation; sequence; transcription regulatory region DNA binding	AT4G38620	ATMYB4; MYB4	myb domain protein 4	myb domain protein 4 myb domain protein 4	Potri.004G138000; Potri.005G112000; Potri.T144800; Potri.011G040300; Potri.004G174400; Potri.010G114000; Potri.009G134000; Potri.008G128500; Potri.006G221800
N1.HOG0000170	N1.HOG0000170_388	complete	0.00538157	Potra2n9c18946	Bpev01.c0549.g0004.m0001	FUN_007778-T1	PA_chr01_G002762	PS_chr01_G001822	PS_chr01_G001822	GO:0003700; GO:0005634; GO:0005667; GO:0006355; GO:0030154; GO:0043565; GO:0044212; GO:0045449	DNA; nucleus; transcription factor complex; regulation of transcription, DNA; cell differentiation; sequence; transcription regulatory region DNA binding	AT4G38620	ATMYB4; MYB4	myb domain protein 4	myb domain protein 4 myb domain protein 4	Potri.004G138000; Potri.005G112000; Potri.T144800; Potri.011G040300; Potri.004G174400; Potri.010G114000; Potri.009G134000; Potri.008G128500; Potri.006G221800
N1.HOG0000170	N1.HOG0000170_574	complete	0.00538199	Potra2n9c18946	Bpev01.c0549.g0004.m0001	FUN_007673-T1	PA_chr01_G002762	PS_chr01_G001822	PS_chr01_G001822	GO:0003700; GO:0005634; GO:0005667; GO:0006355; GO:0030154; GO:0043565; GO:0044212; GO:0045449	DNA; nucleus; transcription factor complex; regulation of transcription, DNA; cell differentiation; sequence; transcription regulatory region DNA binding	AT4G38620	ATMYB4; MYB4	myb domain protein 4	myb domain protein 4 myb domain protein 4	Potri.004G138000; Potri.005G112000; Potri.T144800; Potri.011G040300; Potri.004G174400; Potri.010G114000; Potri.009G134000; Potri.008G128500; Potri.006G221800
N1.HOG0000170	N1.HOG0000170_226	complete	0.00593435	Potra2n9c18946	Bpev01.c0639.g0015.m0001	FUN_030252-T1	PA_chr04_G002634	PS_chr01_G001822	PS_chr01_G001822	GO:0003700; GO:0005634; GO:0005667; GO:0006355; GO:0030154; GO:0043565; GO:0044212; GO:0045449	DNA; nucleus; transcription factor complex; regulation of transcription, DNA; cell differentiation; sequence; transcription regulatory region DNA binding	AT4G38620	ATMYB4; MYB4	myb domain protein 4	myb domain protein 4 myb domain protein 4	Potri.004G138000; Potri.005G112000; Potri.T144800; Potri.011G040300; Potri.004G174400; Potri.010G114000; Potri.009G134000; Potri.008G128500; Potri.006G221800
N1.HOG0000170	N1.HOG0000170_359	complete	0.00593448	Potra2n9c18946	Bpev01.c0639.g0015.m0001	FUN_007778-T1	PA_chr04_G002634	PS_chr01_G001822	PS_chr01_G001822	GO:0003700; GO:0005634; GO:0005667; GO:0006355; GO:0030154; GO:0043565; GO:0044212; GO:0045449	DNA; nucleus; transcription factor complex; regulation of transcription, DNA; cell differentiation; sequence; transcription regulatory region DNA binding	AT4G38620	ATMYB4; MYB4	myb domain protein 4	myb domain protein 4 myb domain protein 4	Potri.004G138000; Potri.005G112000; Potri.T144800; Potri.011G040300; Potri.004G174400; Potri.010G114000; Potri.009G134000; Potri.008G128500; Potri.006G221800
N1.HOG0000170	N1.HOG0000170_515	complete	0.005935	Potra2n9c18946	Bpev01.c0639.g0015.m0001	FUN_007673-T1	PA_chr04_G002634	PS_chr01_G001822	PS_chr01_G001822	GO:0003700; GO:0005634; GO:0005667; GO:0006355; GO:0030154; GO:0043565; GO:0044212; GO:0045449	DNA; nucleus; transcription factor complex; regulation of transcription, DNA; cell differentiation; sequence; transcription regulatory region DNA binding	AT4G38620	ATMYB4; MYB4	myb domain protein 4	myb domain protein 4 myb domain protein 4	Potri.004G138000; Potri.005G112000; Potri.T144800; Potri.011G040300; Potri.004G174400; Potri.010G114000; Potri.009G134000; Potri.008G128500; Potri.006G221800
N1.HOG0000170	N1.HOG0000170_242	complete	0.00593561	Potra2n9c18946	Bpev01.c0549.g0004.m0001	FUN_030252-T1	PA_chr04_G002634	PS_chr01_G001822	PS_chr01_G001822	GO:0003700; GO:0005634; GO:0005667; GO:0006355; GO:0030154; GO:0043565; GO:0044212; GO:0045449	DNA; nucleus; transcription factor complex; regulation of transcription, DNA; cell differentiation; sequence; transcription regulatory region DNA binding	AT4G38620	ATMYB4; MYB4	myb domain protein 4	myb domain protein 4 myb domain protein 4	Potri.004G138000; Potri.005G112000; Potri.T144800; Potri.011G040300; Potri.004G174400; Potri.010G114000; Potri.009G134000; Potri.008G128500; Potri.006G221800
N1.HOG0000170	N1.HOG0000170_389	complete	0.00593572	Potra2n9c18946	Bpev01.c0549.g0004.m0001	FUN_007778-T1	PA_chr04_G002634	PS_chr01_G001822	PS_chr01_G001822	GO:0003700; GO:0005634; GO:0005667; GO:0006355; GO:0030154; GO:0043565; GO:0044212; GO:0045449	DNA; nucleus; transcription factor complex; regulation of transcription, DNA; cell differentiation; sequence; transcription regulatory region DNA binding	AT4G38620	ATMYB4; MYB4	myb domain protein 4	myb domain protein 4 myb domain protein 4	Potri.004G138000; Potri.005G112000; Potri.T144800; Potri.011G040300; Potri.004G174400; Potri.010G114000; Potri.009G134000; Potri.008G128500; Potri.006G221800
N1.HOG0000170	N1.HOG0000170_575	complete	0.00593614	Potra2n9c18946	Bpev01.c0549.g0004.m0001	FUN_007673-T1	PA_chr04_G002634	PS_chr01_G001822	PS_chr01_G001822	GO:0003700; GO:0005634; GO:0005667; GO:0006355; GO:0030154; GO:0043565; GO:0044212; GO:0045449	DNA; nucleus; transcription factor complex; regulation of transcription, DNA; cell differentiation; sequence; transcription regulatory region DNA binding	AT4G38620	ATMYB4; MYB4	myb domain protein 4	myb domain protein 4 myb domain protein 4	Potri.004G138000; Potri.005G112000; Potri.T144800; Potri.011G040300; Potri.004G174400; Potri.010G114000; Potri.009G134000; Potri.008G128500; Potri.006G221800
N1.HOG0000170	N1.HOG0000170_232	complete	0.00598769	Potra2n9c18946	Bpev01.c0639.g0015.m0001	FUN_030252-T1	PA_chr04_G002634	PS_chr01_G001822	PS_chr04_G016676	GO:0003700; GO:0005634; GO:0005667; GO:0006355; GO:0030154; GO:0043565; GO:0044212; GO:0045449	DNA; nucleus; transcription factor complex; regulation of transcription, DNA; cell differentiation; sequence; transcription regulatory region DNA binding	AT4G38620	ATMYB4; MYB4	myb domain protein 4	myb domain protein 4 myb domain protein 4	Potri.004G138000; Potri.005G112000; Potri.T144800; Potri.011G040300; Potri.004G174400; Potri.010G114000; Potri.009G134000; Potri.008G128500; Potri.006G221800
N1.HOG0000170	N1.HOG0000170_275	complete	0.00606667	Potra2n9c18946	Bpev01.c0639.g0015.m0001	FUN_030252-T1	PA_chr01_G002769	PS_chr04_G016676	PS_chr01_G001822	GO:0003700; GO:0005634; GO:0005667; GO:0006355; GO:0030154; GO:0043565; GO:0044212; GO:0045449	DNA; nucleus; transcription factor complex; regulation of transcription, DNA; cell differentiation; sequence; transcription regulatory region DNA binding	AT4G38620	ATMYB4; MYB4	myb domain protein 4	myb domain protein 4 myb domain protein 4	Potri.004G138000; Potri.005G112000; Potri.T144800; Potri.011G040300; Potri.004G174400; Potri.010G114000; Potri.009G134000; Potri.008G128500; Potri.006G221800
N1.HOG0000170	N1.HOG0000170_308	complete	0.00606667	Potra2n9c18946	Bpev01.c0549.g0004.m0001	FUN_030252-T1	PA_chr01_G002769	PS_chr01_G001824	PS_chr01_G001822	GO:0003700; GO:0005634; GO:0005667; GO:0006355; GO:0030154; GO:0043565; GO:0044212; GO:0045449	DNA; nucleus; transcription factor complex; regulation of transcription, DNA; cell differentiation; sequence; transcription regulatory region DNA binding	AT4G38620	ATMYB4; MYB4	myb domain protein 4	myb domain protein 4 myb domain protein 4	Potri.004G138000; Potri.005G112000; Potri.T144800; Potri.011G040300; Potri.004G174400; Potri.010G114000; Potri.009G134000; Potri.008G128500; Potri.006G221800
N1.HOG0000170	N1.HOG0000170_274	complete	0.00606667	Potra2n9c18946	Bpev01.c0639.g0015.m0001	FUN_030252-T1	PA_chr01_G002769	PS_chr01_G001818	PS_chr01_G001822	GO:0003700; GO:0005634; GO:0005667; GO:0006355; GO:0030154; GO:0043565; GO:0044212; GO:0045449	DNA; nucleus; transcription factor complex; regulation of transcription, DNA; cell differentiation; sequence; transcription regulatory region DNA binding	AT4G38620	ATMYB4; MYB4	myb domain protein 4	myb domain protein 4 myb domain protein 4	Potri.004G138000; Potri.005G112000; Potri.T144800; Potri.011G040300; Potri.004G174400; Potri.010G114000; Potri.009G134000; Potri.008G128500; Potri.006G221800
N1.HOG0000170	N1.HOG0000170_306	complete	0.00606667	Potra2n9c18946	Bpev01.c0549.g0004.m0001	FUN_030252-T1	PA_chr01_G002769	PS_chr01_G001818	PS_chr01_G001822	GO:0003700; GO:0005634; GO:0005667; GO:0006355; GO:0030154; GO:0043565; GO:0044212; GO:0045449	DNA; nucleus; transcription factor complex; regulation of transcription, DNA; cell differentiation; sequence; transcription regulatory region DNA binding	AT4G38620	ATMYB4; MYB4	myb domain protein 4	myb domain protein 4 myb domain protein 4	Potri.004G138000; Potri.005G112000; Potri.T144800; Potri.011G040300; Potri.004G174400; Potri.010G114000; Potri.009G134000; Potri.008G128500; Potri.006G221800
N1.HOG0000170	N1.HOG0000170_276	complete	0.00606667	Potra2n9c18946	Bpev01.c0639.g0015.m0001	FUN_030252-T1	PA_chr01_G002769	PS_chr01_G001824	PS_chr01_G001822	GO:0003700; GO:0005634; GO:0005667; GO:0006355; GO:0030154; GO:0043565; GO:0044212; GO:0045449	DNA; nucleus; transcription factor complex; regulation of transcription, DNA; cell differentiation; sequence; transcription regulatory region DNA binding	AT4G38620	ATMYB4; MYB4	myb domain protein 4	myb domain protein 4 myb domain protein 4	Potri.004G138000; Potri.005G112000; Potri.T144800; Potri.011G040300; Potri.004G174400; Potri.010G114000; Potri.009G134000; Potri.008G128500; Potri.006G221800
N1.HOG0000170	N1.HOG0000170_307	complete	0.00606667	Potra2n9c18946	Bpev01.c0549.g0004.m0001	FUN_030252-T1	PA_chr01_G002769	PS_chr04_G016676	PS_chr01_G001822	GO:0003700; GO:0005634; GO:0005667; GO:0006355; GO:0030154; GO:0043565; GO:0044212; GO:0045449	DNA; nucleus; transcription factor complex; regulation of transcription, DNA; cell differentiation; sequence; transcription regulatory region DNA binding	AT4G38620	ATMYB4; MYB4	myb domain protein 4	myb domain protein 4 myb domain protein 4	Potri.004G138000; Potri.005G112000; Potri.T144800; Potri.011G040300; Potri.004G174400; Potri.010G114000; Potri.009G134000; Potri.008G128500; Potri.006G221800
N1.HOG0000170	N1.HOG0000170_380	complete	0.00606678	Potra2n9c18946	Bpev01.c0549.g0004.m0001	FUN_007778-T1	PA_chr01_G002769	PS_chr01_G001824	PS_chr01_G001822	GO:0003700; GO:0005634; GO:0005667; GO:0006355; GO:0030154; GO:0043565; GO:0044212; GO:0045449	DNA; nucleus; transcription factor complex; regulation of transcription, DNA; cell differentiation; sequence; transcription regulatory region DNA binding	AT4G38620	ATMYB4; MYB4	myb domain protein 4	myb domain protein 4 myb domain protein 4	Potri.004G138000; Potri.005G112000; Potri.T144800; Potri.011G040300; Potri.004G174400; Potri.010G114000; Potri.009G134000; Potri.008G128500; Potri.006G221800
N1.HOG0000170	N1.HOG0000170_374	complete	0.00606678	Potra2n9c18946	Bpev01.c0549.g0004.m0001	FUN_007778-T1	PA_chr01_G002769	PS_chr04_G016676	PS_chr01_G001822	GO:0003700; GO:0005634; GO:0005667; GO:0006355; GO:0030154; GO:0043565; GO:0044212; GO:0045449	DNA; nucleus; transcription factor complex; regulation of transcription, DNA; cell differentiation; sequence; transcription regulatory region DNA binding	AT4G38620	ATMYB4; MYB4	myb domain protein 4	myb domain protein 4 myb domain protein 4	Potri.004G138000; Potri.005G112000; Potri.T144800; Potri.011G040300; Potri.004G174400; Potri.010G114000; Potri.009G134000; Potri.008G128500; Potri.006G221800
N1.HOG0000170	N1.HOG0000170_326	complete	0.00606679	Potra2n9c18946	Bpev01.c0639.g0015.m0001	FUN_007778-T1	PA_chr01_G002769	PS_chr04_G016676	PS_chr01_G001822	GO:0003700; GO:0005634; GO:0005667; GO:0006355; GO:0030154; GO:0043565; GO:0044212; GO:0045449	DNA; nucleus; transcription factor complex; regulation of transcription, DNA; cell differentiation; sequence; transcription regulatory region DNA binding	AT4G38620	ATMYB4; MYB4	myb domain protein 4	myb domain protein 4 myb domain protein 4	Potri.004G138000; Potri.005G112000; Potri.T144800; Potri.011G040300; Potri.004G174400; Potri.010G114000; Potri.009G134000; Potri.008G128500; Potri.006G221800
N1.HOG0000170	N1.HOG0000170_344	complete	0.00606679	Potra2n9c18946	Bpev01.c0639.g0015.m0001	FUN_007778-T1	PA_chr01_G002769	PS_chr01_G001824	PS_chr01_G001822	GO:0003700; GO:0005634; GO:0005667; GO:0006355; GO:0030154; GO:0043565; GO:0044212; GO:0045449	DNA; nucleus; transcription factor complex; regulation of transcription, DNA; cell differentiation; sequence; transcription regulatory region DNA binding	AT4G38620	ATMYB4; MYB4	myb domain protein 4	myb domain protein 4 myb domain protein 4	Potri.004G138000; Potri.005G112000; Potri.T144800; Potri.011G040300; Potri.004G174400; Potri.010G114000; Potri.009G134000; Potri.008G128500; Potri.006G221800
N1.HOG0000170	N1.HOG0000170_277	complete	0.00606687	Potra2n9c18946	Bpev01.c0639.g0015.m0001	FUN_030252-T1	PA_chr01_G002769	PS_chr01_G001822	PS_chr01_G001822	GO:0003700; GO:0005634; GO:0005667; GO:0006355; GO:0030154; GO:0043565; GO:0044212; GO:0045449	DNA; nucleus; transcription factor complex; regulation of transcription, DNA; cell differentiation; sequence; transcription regulatory region DNA binding	AT4G38620	ATMYB4; MYB4	myb domain protein 4	myb domain protein 4 myb domain protein 4	Potri.004G138000; Potri.005G112000; Potri.T144800; Potri.011G040300; Potri.004G174400; Potri.010G114000; Potri.009G134000; Potri.008G128500; Potri.006G221800
N1.HOG0000170	N1.HOG0000170_356	complete	0.006067	Potra2n9c18946	Bpev01.c0639.g0015.m0001	FUN_007778-T1	PA_chr01_G002769	PS_chr01_G001822	PS_chr01_G001822	GO:0003700; GO:0005634; GO:0005667; GO:0006355; GO:0030154; GO:0043565; GO:0044212; GO:0045449	DNA; nucleus; transcription factor complex; regulation of transcription, DNA; cell differentiation; sequence; transcription regulatory region DNA binding	AT4G38620	ATMYB4; MYB4	myb domain protein 4	myb domain protein 4 myb domain protein 4	Potri.004G138000; Potri.005G112000; Potri.T144800; Potri.011G040300; Potri.004G174400; Potri.010G114000; Potri.009G134000; Potri.008G128500; Potri.006G221800
N1.HOG0000170	N1.HOG0000170_566	complete	0.0060672	Potra2n9c18946	Bpev01.c0549.g0004.m0001	FUN_007673-T1	PA_chr01_G002769	PS_chr01_G001824	PS_chr01_G001822	GO:0003700; GO:0005634; GO:0005667; GO:0006355; GO:0030154; GO:0043565; GO:0044212; GO:0045449	DNA; nucleus; transcription factor complex; regulation of transcription, DNA; cell differentiation; sequence; transcription regulatory region DNA binding	AT4G38620	ATMYB4; MYB4	myb domain protein 4	myb domain protein 4 myb domain protein 4	Potri.004G138000; Potri.005G112000; Potri.T144800; Potri.011G040300; Potri.004G174400; Potri.010G114000; Potri.009G134000; Potri.008G128500; Potri.006G221800
N1.HOG0000170	N1.HOG0000170_554	complete	0.0060672	Potra2n9c18946	Bpev01.c0549.g0004.m0001	FUN_007673-T1	PA_chr01_G002769	PS_chr01_G001818	PS_chr01_G001822	GO:0003700; GO:0005634; GO:0005667; GO:0006355; GO:0030154; GO:0043565; GO:0044212; GO:0045449	DNA; nucleus; transcription factor complex; regulation of transcription, DNA; cell differentiation; sequence; transcription regulatory region DNA binding	AT4G38620	ATMYB4; MYB4	myb domain protein 4	myb domain protein 4 myb domain protein 4	Potri.004G138000; Potri.005G112000; Potri.T144800; Potri.011G040300; Potri.004G174400; Potri.010G114000; Potri.009G134000; Potri.008G128500; Potri.006G221800
N1.HOG0000170	N1.HOG0000170_560	complete	0.0060672	Potra2n9c18946	Bpev01.c0549.g0004.m0001	FUN_007673-T1	PA_chr01_G002769	PS_chr04_G016676	PS_chr01_G001822	GO:0003700; GO:0005634; GO:0005667; GO:0006355; GO:0030154; GO:0043565; GO:0044212; GO:0045449	DNA; nucleus; transcription factor complex; regulation of transcription, DNA; cell differentiation; sequence; transcription regulatory region DNA binding	AT4G38620	ATMYB4; MYB4	myb domain protein 4	myb domain protein 4 myb domain protein 4	Potri.004G138000; Potri.005G112000; Potri.T144800; Potri.011G040300; Potri.004G174400; Potri.010G114000; Potri.009G134000; Potri.008G128500; Potri.006G221800
N1.HOG0000170	N1.HOG0000170_500	complete	0.00606732	Potra2n9c18946	Bpev01.c0639.g0015.m0001	FUN_007673-T1	PA_chr01_G002769	PS_chr04_G016676	PS_chr01_G001822	GO:0003700; GO:0005634; GO:0005667; GO:0006355; GO:0030154; GO:0043565; GO:0044212; GO:0045449	DNA; nucleus; transcription factor complex; regulation of transcription, DNA; cell differentiation; sequence; transcription regulatory region DNA binding	AT4G38620	ATMYB4; MYB4	myb domain protein 4	myb domain protein 4 myb domain protein 4	Potri.004G138000; Potri.005G112000; Potri.T144800; Potri.011G040300; Potri.004G174400; Potri.010G114000; Potri.009G134000; Potri.008G128500; Potri.006G221800
N1.HOG0000170	N1.HOG0000170_494	complete	0.00606732	Potra2n9c18946	Bpev01.c0639.g0015.m0001	FUN_007673-T1	PA_chr01_G002769	PS_chr01_G001818	PS_chr01_G001822	GO:0003700; GO:0005634; GO:0005667; GO:0006355; GO:0030154; GO:0043565; GO:0044212; GO:0045449	DNA; nucleus; transcription factor complex; regulation of transcription, DNA; cell differentiation; sequence; transcription regulatory region DNA binding	AT4G38620	ATMYB4; MYB4	myb domain protein 4	myb domain protein 4 myb domain protein 4	Potri.004G138000; Potri.005G112000; Potri.T144800; Potri.011G040300; Potri.004G174400; Potri.010G114000; Potri.009G134000; Potri.008G128500; Potri.006G221800
N1.HOG0000170	N1.HOG0000170_506	complete	0.00606732	Potra2n9c18946	Bpev01.c0639.g0015.m0001	FUN_007673-T1	PA_chr01_G002769	PS_chr01_G001824	PS_chr01_G001822	GO:0003700; GO:0005634; GO:0005667; GO:0006355; GO:0030154; GO:0043565; GO:0044212; GO:0045449	DNA; nucleus; transcription factor complex; regulation of transcription, DNA; cell differentiation; sequence; transcription regulatory region DNA binding	AT4G38620	ATMYB4; MYB4	myb domain protein 4	myb domain protein 4 myb domain protein 4	Potri.004G138000; Potri.005G112000; Potri.T144800; Potri.011G040300; Potri.004G174400; Potri.010G114000; Potri.009G134000; Potri.008G128500; Potri.006G221800
N1.HOG0000170	N1.HOG0000170_512	complete	0.00606752	Potra2n9c18946	Bpev01.c0639.g0015.m0001	FUN_007673-T1	PA_chr01_G002769	PS_chr01_G001822	PS_chr01_G001822	GO:0003700; GO:0005634; GO:0005667; GO:0006355; GO:0030154; GO:0043565; GO:0044212; GO:0045449	DNA; nucleus; transcription factor complex; regulation of transcription, DNA; cell differentiation; sequence; transcription regulatory region DNA binding	AT4G38620	ATMYB4; MYB4	myb domain protein 4	myb domain protein 4 myb domain protein 4	Potri.004G138000; Potri.005G112000; Potri.T144800; Potri.011G040300; Potri.004G174400; Potri.010G114000; Potri.009G134000; Potri.008G128500; Potri.006G221800
N1.HOG0000170	N1.HOG0000170_309	complete	0.00606813	Potra2n9c18946	Bpev01.c0549.g0004.m0001	FUN_030252-T1	PA_chr01_G002769	PS_chr01_G001822	PS_chr01_G001822	GO:0003700; GO:0005634; GO:0005667; GO:0006355; GO:0030154; GO:0043565; GO:0044212; GO:0045449	DNA; nucleus; transcription factor complex; regulation of transcription, DNA; cell differentiation; sequence; transcription regulatory region DNA binding	AT4G38620	ATMYB4; MYB4	myb domain protein 4	myb domain protein 4 myb domain protein 4	Potri.004G138000; Potri.005G112000; Potri.T144800; Potri.011G040300; Potri.004G174400; Potri.010G114000; Potri.009G134000; Potri.008G128500; Potri.006G221800
N1.HOG0000170	N1.HOG0000170_386	complete	0.00606824	Potra2n9c18946	Bpev01.c0549.g0004.m0001	FUN_007778-T1	PA_chr01_G002769	PS_chr01_G001822	PS_chr01_G001822	GO:0003700; GO:0005634; GO:0005667; GO:0006355; GO:0030154; GO:0043565; GO:0044212; GO:0045449	DNA; nucleus; transcription factor complex; regulation of transcription, DNA; cell differentiation; sequence; transcription regulatory region DNA binding	AT4G38620	ATMYB4; MYB4	myb domain protein 4	myb domain protein 4 myb domain protein 4	Potri.004G138000; Potri.005G112000; Potri.T144800; Potri.011G040300; Potri.004G174400; Potri.010G114000; Potri.009G134000; Potri.008G128500; Potri.006G221800
N1.HOG0000170	N1.HOG0000170_572	complete	0.00606866	Potra2n9c18946	Bpev01.c0549.g0004.m0001	FUN_007673-T1	PA_chr01_G002769	PS_chr01_G001822	PS_chr01_G001822	GO:0003700; GO:0005634; GO:0005667; GO:0006355; GO:0030154; GO:0043565; GO:0044212; GO:0045449	DNA; nucleus; transcription factor complex; regulation of transcription, DNA; cell differentiation; sequence; transcription regulatory region DNA binding	AT4G38620	ATMYB4; MYB4	myb domain protein 4	myb domain protein 4 myb domain protein 4	Potri.004G138000; Potri.005G112000; Potri.T144800; Potri.011G040300; Potri.004G174400; Potri.010G114000; Potri.009G134000; Potri.008G128500; Potri.006G221800
N1.HOG0000170	N1.HOG0000170_282	complete	0.00612	Potra2n9c18946	Bpev01.c0639.g0015.m0001	FUN_030252-T1	PA_chr01_G002769	PS_chr04_G016676	PS_chr04_G016676	GO:0003700; GO:0005634; GO:0005667; GO:0006355; GO:0030154; GO:0043565; GO:0044212; GO:0045449	DNA; nucleus; transcription factor complex; regulation of transcription, DNA; cell differentiation; sequence; transcription regulatory region DNA binding	AT4G38620	ATMYB4; MYB4	myb domain protein 4	myb domain protein 4 myb domain protein 4	Potri.004G138000; Potri.005G112000; Potri.T144800; Potri.011G040300; Potri.004G174400; Potri.010G114000; Potri.009G134000; Potri.008G128500; Potri.006G221800
N1.HOG0000170	N1.HOG0000170_283	complete	0.0061202	Potra2n9c18946	Bpev01.c0639.g0015.m0001	FUN_030252-T1	PA_chr01_G002769	PS_chr01_G001822	PS_chr04_G016676	GO:0003700; GO:0005634; GO:0005667; GO:0006355; GO:0030154; GO:0043565; GO:0044212; GO:0045449	DNA; nucleus; transcription factor complex; regulation of transcription, DNA; cell differentiation; sequence; transcription regulatory region DNA binding	AT4G38620	ATMYB4; MYB4	myb domain protein 4	myb domain protein 4 myb domain protein 4	Potri.004G138000; Potri.005G112000; Potri.T144800; Potri.011G040300; Potri.004G174400; Potri.010G114000; Potri.009G134000; Potri.008G128500; Potri.006G221800
N1.HOG0000170	N1.HOG0000170_468	complete	0.00668469	Potra2n4c9673	Bpev01.c0549.g0004.m0001	FUN_007778-T1	PA_chr01_G003821	PS_chr01_G001824	PS_chr01_G001822	GO:0003700; GO:0005634; GO:0005667; GO:0006355; GO:0030154; GO:0043565; GO:0044212; GO:0045449	DNA; nucleus; transcription factor complex; regulation of transcription, DNA; cell differentiation; sequence; transcription regulatory region DNA binding	AT4G38620	ATMYB4; MYB4	myb domain protein 4	myb domain protein 4 myb domain protein 4	Potri.004G138000; Potri.005G112000; Potri.T144800; Potri.011G040300; Potri.004G174400; Potri.010G114000; Potri.009G134000; Potri.008G128500; Potri.006G221800
N1.HOG0000170	N1.HOG0000170_432	complete	0.0066847	Potra2n4c9673	Bpev01.c0639.g0015.m0001	FUN_007778-T1	PA_chr01_G003821	PS_chr01_G001824	PS_chr01_G001822	GO:0003700; GO:0005634; GO:0005667; GO:0006355; GO:0030154; GO:0043565; GO:0044212; GO:0045449	DNA; nucleus; transcription factor complex; regulation of transcription, DNA; cell differentiation; sequence; transcription regulatory region DNA binding	AT4G38620	ATMYB4; MYB4	myb domain protein 4	myb domain protein 4 myb domain protein 4	Potri.004G138000; Potri.005G112000; Potri.T144800; Potri.011G040300; Potri.004G174400; Potri.010G114000; Potri.009G134000; Potri.008G128500; Potri.006G221800
N1.HOG0000170	N1.HOG0000170_678	complete	0.00668511	Potra2n4c9673	Bpev01.c0549.g0004.m0001	FUN_007673-T1	PA_chr01_G003821	PS_chr01_G001824	PS_chr01_G001822	GO:0003700; GO:0005634; GO:0005667; GO:0006355; GO:0030154; GO:0043565; GO:0044212; GO:0045449	DNA; nucleus; transcription factor complex; regulation of transcription, DNA; cell differentiation; sequence; transcription regulatory region DNA binding	AT4G38620	ATMYB4; MYB4	myb domain protein 4	myb domain protein 4 myb domain protein 4	Potri.004G138000; Potri.005G112000; Potri.T144800; Potri.011G040300; Potri.004G174400; Potri.010G114000; Potri.009G134000; Potri.008G128500; Potri.006G221800
N1.HOG0000170	N1.HOG0000170_618	complete	0.00668523	Potra2n4c9673	Bpev01.c0639.g0015.m0001	FUN_007673-T1	PA_chr01_G003821	PS_chr01_G001824	PS_chr01_G001822	GO:0003700; GO:0005634; GO:0005667; GO:0006355; GO:0030154; GO:0043565; GO:0044212; GO:0045449	DNA; nucleus; transcription factor complex; regulation of transcription, DNA; cell differentiation; sequence; transcription regulatory region DNA binding	AT4G38620	ATMYB4; MYB4	myb domain protein 4	myb domain protein 4 myb domain protein 4	Potri.004G138000; Potri.005G112000; Potri.T144800; Potri.011G040300; Potri.004G174400; Potri.010G114000; Potri.009G134000; Potri.008G128500; Potri.006G221800
N1.HOG0000170	N1.HOG0000170_666	complete	0.00668551	Potra2n4c9673	Bpev01.c0549.g0004.m0001	FUN_007673-T1	PA_chr01_G003821	PS_chr01_G001818	PS_chr01_G001822	GO:0003700; GO:0005634; GO:0005667; GO:0006355; GO:0030154; GO:0043565; GO:0044212; GO:0045449	DNA; nucleus; transcription factor complex; regulation of transcription, DNA; cell differentiation; sequence; transcription regulatory region DNA binding	AT4G38620	ATMYB4; MYB4	myb domain protein 4	myb domain protein 4 myb domain protein 4	Potri.004G138000; Potri.005G112000; Potri.T144800; Potri.011G040300; Potri.004G174400; Potri.010G114000; Potri.009G134000; Potri.008G128500; Potri.006G221800
N1.HOG0000170	N1.HOG0000170_606	complete	0.00668563	Potra2n4c9673	Bpev01.c0639.g0015.m0001	FUN_007673-T1	PA_chr01_G003821	PS_chr01_G001818	PS_chr01_G001822	GO:0003700; GO:0005634; GO:0005667; GO:0006355; GO:0030154; GO:0043565; GO:0044212; GO:0045449	DNA; nucleus; transcription factor complex; regulation of transcription, DNA; cell differentiation; sequence; transcription regulatory region DNA binding	AT4G38620	ATMYB4; MYB4	myb domain protein 4	myb domain protein 4 myb domain protein 4	Potri.004G138000; Potri.005G112000; Potri.T144800; Potri.011G040300; Potri.004G174400; Potri.010G114000; Potri.009G134000; Potri.008G128500; Potri.006G221800
N1.HOG0000170	N1.HOG0000170_486	complete	0.0067192	Potra2n4c9673	Bpev01.c0549.g0004.m0001	FUN_007778-T1	PA_chr01_G003821	PS_chr01_G001824	PS_chr01_G001824	GO:0003700; GO:0005634; GO:0005667; GO:0006355; GO:0030154; GO:0043565; GO:0044212; GO:0045449	DNA; nucleus; transcription factor complex; regulation of transcription, DNA; cell differentiation; sequence; transcription regulatory region DNA binding	AT4G38620	ATMYB4; MYB4	myb domain protein 4	myb domain protein 4 myb domain protein 4	Potri.004G138000; Potri.005G112000; Potri.T144800; Potri.011G040300; Potri.004G174400; Potri.010G114000; Potri.009G134000; Potri.008G128500; Potri.006G221800
N1.HOG0000170	N1.HOG0000170_438	complete	0.00671921	Potra2n4c9673	Bpev01.c0639.g0015.m0001	FUN_007778-T1	PA_chr01_G003821	PS_chr01_G001824	PS_chr01_G001824	GO:0003700; GO:0005634; GO:0005667; GO:0006355; GO:0030154; GO:0043565; GO:0044212; GO:0045449	DNA; nucleus; transcription factor complex; regulation of transcription, DNA; cell differentiation; sequence; transcription regulatory region DNA binding	AT4G38620	ATMYB4; MYB4	myb domain protein 4	myb domain protein 4 myb domain protein 4	Potri.004G138000; Potri.005G112000; Potri.T144800; Potri.011G040300; Potri.004G174400; Potri.010G114000; Potri.009G134000; Potri.008G128500; Potri.006G221800
N1.HOG0000170	N1.HOG0000170_702	complete	0.0067193	Potra2n4c9673	Bpev01.c0549.g0004.m0001	FUN_007673-T1	PA_chr01_G003821	PS_chr01_G001824	PS_chr01_G001824	GO:0003700; GO:0005634; GO:0005667; GO:0006355; GO:0030154; GO:0043565; GO:0044212; GO:0045449	DNA; nucleus; transcription factor complex; regulation of transcription, DNA; cell differentiation; sequence; transcription regulatory region DNA binding	AT4G38620	ATMYB4; MYB4	myb domain protein 4	myb domain protein 4 myb domain protein 4	Potri.004G138000; Potri.005G112000; Potri.T144800; Potri.011G040300; Potri.004G174400; Potri.010G114000; Potri.009G134000; Potri.008G128500; Potri.006G221800
N1.HOG0000170	N1.HOG0000170_642	complete	0.00671943	Potra2n4c9673	Bpev01.c0639.g0015.m0001	FUN_007673-T1	PA_chr01_G003821	PS_chr01_G001824	PS_chr01_G001824	GO:0003700; GO:0005634; GO:0005667; GO:0006355; GO:0030154; GO:0043565; GO:0044212; GO:0045449	DNA; nucleus; transcription factor complex; regulation of transcription, DNA; cell differentiation; sequence; transcription regulatory region DNA binding	AT4G38620	ATMYB4; MYB4	myb domain protein 4	myb domain protein 4 myb domain protein 4	Potri.004G138000; Potri.005G112000; Potri.T144800; Potri.011G040300; Potri.004G174400; Potri.010G114000; Potri.009G134000; Potri.008G128500; Potri.006G221800
N1.HOG0000170	N1.HOG0000170_690	complete	0.00671971	Potra2n4c9673	Bpev01.c0549.g0004.m0001	FUN_007673-T1	PA_chr01_G003821	PS_chr01_G001818	PS_chr01_G001824	GO:0003700; GO:0005634; GO:0005667; GO:0006355; GO:0030154; GO:0043565; GO:0044212; GO:0045449	DNA; nucleus; transcription factor complex; regulation of transcription, DNA; cell differentiation; sequence; transcription regulatory region DNA binding	AT4G38620	ATMYB4; MYB4	myb domain protein 4	myb domain protein 4 myb domain protein 4	Potri.004G138000; Potri.005G112000; Potri.T144800; Potri.011G040300; Potri.004G174400; Potri.010G114000; Potri.009G134000; Potri.008G128500; Potri.006G221800
N1.HOG0000170	N1.HOG0000170_630	complete	0.00671983	Potra2n4c9673	Bpev01.c0639.g0015.m0001	FUN_007673-T1	PA_chr01_G003821	PS_chr01_G001818	PS_chr01_G001824	GO:0003700; GO:0005634; GO:0005667; GO:0006355; GO:0030154; GO:0043565; GO:0044212; GO:0045449	DNA; nucleus; transcription factor complex; regulation of transcription, DNA; cell differentiation; sequence; transcription regulatory region DNA binding	AT4G38620	ATMYB4; MYB4	myb domain protein 4	myb domain protein 4 myb domain protein 4	Potri.004G138000; Potri.005G112000; Potri.T144800; Potri.011G040300; Potri.004G174400; Potri.010G114000; Potri.009G134000; Potri.008G128500; Potri.006G221800
N1.HOG0000170	N1.HOG0000170_444	complete	0.00672924	Potra2n4c9673	Bpev01.c0639.g0015.m0001	FUN_007778-T1	PA_chr01_G003821	PS_chr01_G001822	PS_chr01_G001822	GO:0003700; GO:0005634; GO:0005667; GO:0006355; GO:0030154; GO:0043565; GO:0044212; GO:0045449	DNA; nucleus; transcription factor complex; regulation of transcription, DNA; cell differentiation; sequence; transcription regulatory region DNA binding	AT4G38620	ATMYB4; MYB4	myb domain protein 4	myb domain protein 4 myb domain protein 4	Potri.004G138000; Potri.005G112000; Potri.T144800; Potri.011G040300; Potri.004G174400; Potri.010G114000; Potri.009G134000; Potri.008G128500; Potri.006G221800
N1.HOG0000170	N1.HOG0000170_624	complete	0.00672976	Potra2n4c9673	Bpev01.c0639.g0015.m0001	FUN_007673-T1	PA_chr01_G003821	PS_chr01_G001822	PS_chr01_G001822	GO:0003700; GO:0005634; GO:0005667; GO:0006355; GO:0030154; GO:0043565; GO:0044212; GO:0045449	DNA; nucleus; transcription factor complex; regulation of transcription, DNA; cell differentiation; sequence; transcription regulatory region DNA binding	AT4G38620	ATMYB4; MYB4	myb domain protein 4	myb domain protein 4 myb domain protein 4	Potri.004G138000; Potri.005G112000; Potri.T144800; Potri.011G040300; Potri.004G174400; Potri.010G114000; Potri.009G134000; Potri.008G128500; Potri.006G221800
N1.HOG0000170	N1.HOG0000170_474	complete	0.00673048	Potra2n4c9673	Bpev01.c0549.g0004.m0001	FUN_007778-T1	PA_chr01_G003821	PS_chr01_G001822	PS_chr01_G001822	GO:0003700; GO:0005634; GO:0005667; GO:0006355; GO:0030154; GO:0043565; GO:0044212; GO:0045449	DNA; nucleus; transcription factor complex; regulation of transcription, DNA; cell differentiation; sequence; transcription regulatory region DNA binding	AT4G38620	ATMYB4; MYB4	myb domain protein 4	myb domain protein 4 myb domain protein 4	Potri.004G138000; Potri.005G112000; Potri.T144800; Potri.011G040300; Potri.004G174400; Potri.010G114000; Potri.009G134000; Potri.008G128500; Potri.006G221800
N1.HOG0000170	N1.HOG0000170_684	complete	0.0067309	Potra2n4c9673	Bpev01.c0549.g0004.m0001	FUN_007673-T1	PA_chr01_G003821	PS_chr01_G001822	PS_chr01_G001822	GO:0003700; GO:0005634; GO:0005667; GO:0006355; GO:0030154; GO:0043565; GO:0044212; GO:0045449	DNA; nucleus; transcription factor complex; regulation of transcription, DNA; cell differentiation; sequence; transcription regulatory region DNA binding	AT4G38620	ATMYB4; MYB4	myb domain protein 4	myb domain protein 4 myb domain protein 4	Potri.004G138000; Potri.005G112000; Potri.T144800; Potri.011G040300; Potri.004G174400; Potri.010G114000; Potri.009G134000; Potri.008G128500; Potri.006G221800
N1.HOG0000170	N1.HOG0000170_450	complete	0.00676375	Potra2n4c9673	Bpev01.c0639.g0015.m0001	FUN_007778-T1	PA_chr01_G003821	PS_chr01_G001822	PS_chr01_G001824	GO:0003700; GO:0005634; GO:0005667; GO:0006355; GO:0030154; GO:0043565; GO:0044212; GO:0045449	DNA; nucleus; transcription factor complex; regulation of transcription, DNA; cell differentiation; sequence; transcription regulatory region DNA binding	AT4G38620	ATMYB4; MYB4	myb domain protein 4	myb domain protein 4 myb domain protein 4	Potri.004G138000; Potri.005G112000; Potri.T144800; Potri.011G040300; Potri.004G174400; Potri.010G114000; Potri.009G134000; Potri.008G128500; Potri.006G221800
N1.HOG0000170	N1.HOG0000170_648	complete	0.00676396	Potra2n4c9673	Bpev01.c0639.g0015.m0001	FUN_007673-T1	PA_chr01_G003821	PS_chr01_G001822	PS_chr01_G001824	GO:0003700; GO:0005634; GO:0005667; GO:0006355; GO:0030154; GO:0043565; GO:0044212; GO:0045449	DNA; nucleus; transcription factor complex; regulation of transcription, DNA; cell differentiation; sequence; transcription regulatory region DNA binding	AT4G38620	ATMYB4; MYB4	myb domain protein 4	myb domain protein 4 myb domain protein 4	Potri.004G138000; Potri.005G112000; Potri.T144800; Potri.011G040300; Potri.004G174400; Potri.010G114000; Potri.009G134000; Potri.008G128500; Potri.006G221800
N1.HOG0000170	N1.HOG0000170_492	complete	0.00676499	Potra2n4c9673	Bpev01.c0549.g0004.m0001	FUN_007778-T1	PA_chr01_G003821	PS_chr01_G001822	PS_chr01_G001824	GO:0003700; GO:0005634; GO:0005667; GO:0006355; GO:0030154; GO:0043565; GO:0044212; GO:0045449	DNA; nucleus; transcription factor complex; regulation of transcription, DNA; cell differentiation; sequence; transcription regulatory region DNA binding	AT4G38620	ATMYB4; MYB4	myb domain protein 4	myb domain protein 4 myb domain protein 4	Potri.004G138000; Potri.005G112000; Potri.T144800; Potri.011G040300; Potri.004G174400; Potri.010G114000; Potri.009G134000; Potri.008G128500; Potri.006G221800
N1.HOG0000170	N1.HOG0000170_708	complete	0.0067651	Potra2n4c9673	Bpev01.c0549.g0004.m0001	FUN_007673-T1	PA_chr01_G003821	PS_chr01_G001822	PS_chr01_G001824	GO:0003700; GO:0005634; GO:0005667; GO:0006355; GO:0030154; GO:0043565; GO:0044212; GO:0045449	DNA; nucleus; transcription factor complex; regulation of transcription, DNA; cell differentiation; sequence; transcription regulatory region DNA binding	AT4G38620	ATMYB4; MYB4	myb domain protein 4	myb domain protein 4 myb domain protein 4	Potri.004G138000; Potri.005G112000; Potri.T144800; Potri.011G040300; Potri.004G174400; Potri.010G114000; Potri.009G134000; Potri.008G128500; Potri.006G221800
N1.HOG0000170	N1.HOG0000170_456	complete	0.00692235	Potra2n4c9673	Bpev01.c0639.g0015.m0001	FUN_007778-T1	PA_chr01_G003821	PS_chr01_G001822	PS_chr04_G016676	GO:0003700; GO:0005634; GO:0005667; GO:0006355; GO:0030154; GO:0043565; GO:0044212; GO:0045449	DNA; nucleus; transcription factor complex; regulation of transcription, DNA; cell differentiation; sequence; transcription regulatory region DNA binding	AT4G38620	ATMYB4; MYB4	myb domain protein 4	myb domain protein 4 myb domain protein 4	Potri.004G138000; Potri.005G112000; Potri.T144800; Potri.011G040300; Potri.004G174400; Potri.010G114000; Potri.009G134000; Potri.008G128500; Potri.006G221800
N1.HOG0000170	N1.HOG0000170_660	complete	0.00693012	Potra2n4c9673	Bpev01.c0639.g0015.m0001	FUN_007673-T1	PA_chr01_G003821	PS_chr01_G001822	PS_chr04_G016676	GO:0003700; GO:0005634; GO:0005667; GO:0006355; GO:0030154; GO:0043565; GO:0044212; GO:0045449	DNA; nucleus; transcription factor complex; regulation of transcription, DNA; cell differentiation; sequence; transcription regulatory region DNA binding	AT4G38620	ATMYB4; MYB4	myb domain protein 4	myb domain protein 4 myb domain protein 4	Potri.004G138000; Potri.005G112000; Potri.T144800; Potri.011G040300; Potri.004G174400; Potri.010G114000; Potri.009G134000; Potri.008G128500; Potri.006G221800
N1.HOG0000170	N1.HOG0000170_144	complete	0.007017	Potra2n9c18946	Bpev01.c0549.g0004.m0001	FUN_030252-T1	PA_chr01_G002769	PS_chr01_G001821	PS_chr01_G001822	GO:0003700; GO:0005634; GO:0005667; GO:0006355; GO:0030154; GO:0043565; GO:0044212; GO:0045449	DNA; nucleus; transcription factor complex; regulation of transcription, DNA; cell differentiation; sequence; transcription regulatory region DNA binding	AT4G38620	ATMYB4; MYB4	myb domain protein 4	myb domain protein 4 myb domain protein 4	Potri.004G138000; Potri.005G112000; Potri.T144800; Potri.011G040300; Potri.004G174400; Potri.010G114000; Potri.009G134000; Potri.008G128500; Potri.006G221800
N1.HOG0000170	N1.HOG0000170_133	complete	0.007127	Potra2n9c18946	Bpev01.c0639.g0015.m0001	FUN_030252-T1	PA_chr01_G002769	PS_chr01_G001821	PS_chr01_G001822	GO:0003700; GO:0005634; GO:0005667; GO:0006355; GO:0030154; GO:0043565; GO:0044212; GO:0045449	DNA; nucleus; transcription factor complex; regulation of transcription, DNA; cell differentiation; sequence; transcription regulatory region DNA binding	AT4G38620	ATMYB4; MYB4	myb domain protein 4	myb domain protein 4 myb domain protein 4	Potri.004G138000; Potri.005G112000; Potri.T144800; Potri.011G040300; Potri.004G174400; Potri.010G114000; Potri.009G134000; Potri.008G128500; Potri.006G221800
N1.HOG0000170	N1.HOG0000170_402	complete	0.00936503	Potra2n9c18946	Bpev01.c0549.g0004.m0001	FUN_007778-T1	PA_chr01_G003821	PS_chr01_G001824	PS_chr01_G001824	GO:0003700; GO:0005634; GO:0005667; GO:0006355; GO:0030154; GO:0043565; GO:0044212; GO:0045449	DNA; nucleus; transcription factor complex; regulation of transcription, DNA; cell differentiation; sequence; transcription regulatory region DNA binding	AT4G38620	ATMYB4; MYB4	myb domain protein 4	myb domain protein 4 myb domain protein 4	Potri.004G138000; Potri.005G112000; Potri.T144800; Potri.011G040300; Potri.004G174400; Potri.010G114000; Potri.009G134000; Potri.008G128500; Potri.006G221800
N1.HOG0000170	N1.HOG0000170_354	complete	0.00936505	Potra2n9c18946	Bpev01.c0639.g0015.m0001	FUN_007778-T1	PA_chr01_G003821	PS_chr01_G001824	PS_chr01_G001824	GO:0003700; GO:0005634; GO:0005667; GO:0006355; GO:0030154; GO:0043565; GO:0044212; GO:0045449	DNA; nucleus; transcription factor complex; regulation of transcription, DNA; cell differentiation; sequence; transcription regulatory region DNA binding	AT4G38620	ATMYB4; MYB4	myb domain protein 4	myb domain protein 4 myb domain protein 4	Potri.004G138000; Potri.005G112000; Potri.T144800; Potri.011G040300; Potri.004G174400; Potri.010G114000; Potri.009G134000; Potri.008G128500; Potri.006G221800
N1.HOG0000170	N1.HOG0000170_594	complete	0.00936514	Potra2n9c18946	Bpev01.c0549.g0004.m0001	FUN_007673-T1	PA_chr01_G003821	PS_chr01_G001824	PS_chr01_G001824	GO:0003700; GO:0005634; GO:0005667; GO:0006355; GO:0030154; GO:0043565; GO:0044212; GO:0045449	DNA; nucleus; transcription factor complex; regulation of transcription, DNA; cell differentiation; sequence; transcription regulatory region DNA binding	AT4G38620	ATMYB4; MYB4	myb domain protein 4	myb domain protein 4 myb domain protein 4	Potri.004G138000; Potri.005G112000; Potri.T144800; Potri.011G040300; Potri.004G174400; Potri.010G114000; Potri.009G134000; Potri.008G128500; Potri.006G221800
N1.HOG0000170	N1.HOG0000170_534	complete	0.00936526	Potra2n9c18946	Bpev01.c0639.g0015.m0001	FUN_007673-T1	PA_chr01_G003821	PS_chr01_G001824	PS_chr01_G001824	GO:0003700; GO:0005634; GO:0005667; GO:0006355; GO:0030154; GO:0043565; GO:0044212; GO:0045449	DNA; nucleus; transcription factor complex; regulation of transcription, DNA; cell differentiation; sequence; transcription regulatory region DNA binding	AT4G38620	ATMYB4; MYB4	myb domain protein 4	myb domain protein 4 myb domain protein 4	Potri.004G138000; Potri.005G112000; Potri.T144800; Potri.011G040300; Potri.004G174400; Potri.010G114000; Potri.009G134000; Potri.008G128500; Potri.006G221800
N1.HOG0000170	N1.HOG0000170_582	complete	0.00936554	Potra2n9c18946	Bpev01.c0549.g0004.m0001	FUN_007673-T1	PA_chr01_G003821	PS_chr01_G001818	PS_chr01_G001824	GO:0003700; GO:0005634; GO:0005667; GO:0006355; GO:0030154; GO:0043565; GO:0044212; GO:0045449	DNA; nucleus; transcription factor complex; regulation of transcription, DNA; cell differentiation; sequence; transcription regulatory region DNA binding	AT4G38620	ATMYB4; MYB4	myb domain protein 4	myb domain protein 4 myb domain protein 4	Potri.004G138000; Potri.005G112000; Potri.T144800; Potri.011G040300; Potri.004G174400; Potri.010G114000; Potri.009G134000; Potri.008G128500; Potri.006G221800
N1.HOG0000170	N1.HOG0000170_522	complete	0.00936566	Potra2n9c18946	Bpev01.c0639.g0015.m0001	FUN_007673-T1	PA_chr01_G003821	PS_chr01_G001818	PS_chr01_G001824	GO:0003700; GO:0005634; GO:0005667; GO:0006355; GO:0030154; GO:0043565; GO:0044212; GO:0045449	DNA; nucleus; transcription factor complex; regulation of transcription, DNA; cell differentiation; sequence; transcription regulatory region DNA binding	AT4G38620	ATMYB4; MYB4	myb domain protein 4	myb domain protein 4 myb domain protein 4	Potri.004G138000; Potri.005G112000; Potri.T144800; Potri.011G040300; Potri.004G174400; Potri.010G114000; Potri.009G134000; Potri.008G128500; Potri.006G221800
N1.HOG0000170	N1.HOG0000170_366	complete	0.00940958	Potra2n9c18946	Bpev01.c0639.g0015.m0001	FUN_007778-T1	PA_chr01_G003821	PS_chr01_G001822	PS_chr01_G001824	GO:0003700; GO:0005634; GO:0005667; GO:0006355; GO:0030154; GO:0043565; GO:0044212; GO:0045449	DNA; nucleus; transcription factor complex; regulation of transcription, DNA; cell differentiation; sequence; transcription regulatory region DNA binding	AT4G38620	ATMYB4; MYB4	myb domain protein 4	myb domain protein 4 myb domain protein 4	Potri.004G138000; Potri.005G112000; Potri.T144800; Potri.011G040300; Potri.004G174400; Potri.010G114000; Potri.009G134000; Potri.008G128500; Potri.006G221800
N1.HOG0000170	N1.HOG0000170_540	complete	0.00940979	Potra2n9c18946	Bpev01.c0639.g0015.m0001	FUN_007673-T1	PA_chr01_G003821	PS_chr01_G001822	PS_chr01_G001824	GO:0003700; GO:0005634; GO:0005667; GO:0006355; GO:0030154; GO:0043565; GO:0044212; GO:0045449	DNA; nucleus; transcription factor complex; regulation of transcription, DNA; cell differentiation; sequence; transcription regulatory region DNA binding	AT4G38620	ATMYB4; MYB4	myb domain protein 4	myb domain protein 4 myb domain protein 4	Potri.004G138000; Potri.005G112000; Potri.T144800; Potri.011G040300; Potri.004G174400; Potri.010G114000; Potri.009G134000; Potri.008G128500; Potri.006G221800
N1.HOG0000170	N1.HOG0000170_408	complete	0.00941082	Potra2n9c18946	Bpev01.c0549.g0004.m0001	FUN_007778-T1	PA_chr01_G003821	PS_chr01_G001822	PS_chr01_G001824	GO:0003700; GO:0005634; GO:0005667; GO:0006355; GO:0030154; GO:0043565; GO:0044212; GO:0045449	DNA; nucleus; transcription factor complex; regulation of transcription, DNA; cell differentiation; sequence; transcription regulatory region DNA binding	AT4G38620	ATMYB4; MYB4	myb domain protein 4	myb domain protein 4 myb domain protein 4	Potri.004G138000; Potri.005G112000; Potri.T144800; Potri.011G040300; Potri.004G174400; Potri.010G114000; Potri.009G134000; Potri.008G128500; Potri.006G221800
N1.HOG0000170	N1.HOG0000170_600	complete	0.00941093	Potra2n9c18946	Bpev01.c0549.g0004.m0001	FUN_007673-T1	PA_chr01_G003821	PS_chr01_G001822	PS_chr01_G001824	GO:0003700; GO:0005634; GO:0005667; GO:0006355; GO:0030154; GO:0043565; GO:0044212; GO:0045449	DNA; nucleus; transcription factor complex; regulation of transcription, DNA; cell differentiation; sequence; transcription regulatory region DNA binding	AT4G38620	ATMYB4; MYB4	myb domain protein 4	myb domain protein 4 myb domain protein 4	Potri.004G138000; Potri.005G112000; Potri.T144800; Potri.011G040300; Potri.004G174400; Potri.010G114000; Potri.009G134000; Potri.008G128500; Potri.006G221800
N1.HOG0000170	N1.HOG0000170_291	complete	0.0118834	Potra2n19c34420	Bpev01.c0639.g0015.m0001	FUN_030252-T1	PA_chr01_G002769	PS_chr04_G016676	PS_chr01_G001822	GO:0003700; GO:0005634; GO:0005667; GO:0006355; GO:0030154; GO:0043565; GO:0044212; GO:0045449	DNA; nucleus; transcription factor complex; regulation of transcription, DNA; cell differentiation; sequence; transcription regulatory region DNA binding	AT4G38620	ATMYB4; MYB4	myb domain protein 4	myb domain protein 4 myb domain protein 4	Potri.004G138000; Potri.005G112000; Potri.T144800; Potri.011G040300; Potri.004G174400; Potri.010G114000; Potri.009G134000; Potri.008G128500; Potri.006G221800
N1.HOG0000170	N1.HOG0000170_322	complete	0.0118834	Potra2n19c34420	Bpev01.c0549.g0004.m0001	FUN_030252-T1	PA_chr01_G002769	PS_chr01_G001824	PS_chr01_G001822	GO:0003700; GO:0005634; GO:0005667; GO:0006355; GO:0030154; GO:0043565; GO:0044212; GO:0045449	DNA; nucleus; transcription factor complex; regulation of transcription, DNA; cell differentiation; sequence; transcription regulatory region DNA binding	AT4G38620	ATMYB4; MYB4	myb domain protein 4	myb domain protein 4 myb domain protein 4	Potri.004G138000; Potri.005G112000; Potri.T144800; Potri.011G040300; Potri.004G174400; Potri.010G114000; Potri.009G134000; Potri.008G128500; Potri.006G221800
N1.HOG0000170	N1.HOG0000170_290	complete	0.0118834	Potra2n19c34420	Bpev01.c0639.g0015.m0001	FUN_030252-T1	PA_chr01_G002769	PS_chr01_G001818	PS_chr01_G001822	GO:0003700; GO:0005634; GO:0005667; GO:0006355; GO:0030154; GO:0043565; GO:0044212; GO:0045449	DNA; nucleus; transcription factor complex; regulation of transcription, DNA; cell differentiation; sequence; transcription regulatory region DNA binding	AT4G38620	ATMYB4; MYB4	myb domain protein 4	myb domain protein 4 myb domain protein 4	Potri.004G138000; Potri.005G112000; Potri.T144800; Potri.011G040300; Potri.004G174400; Potri.010G114000; Potri.009G134000; Potri.008G128500; Potri.006G221800
N1.HOG0000170	N1.HOG0000170_320	complete	0.0118834	Potra2n19c34420	Bpev01.c0549.g0004.m0001	FUN_030252-T1	PA_chr01_G002769	PS_chr01_G001818	PS_chr01_G001822	GO:0003700; GO:0005634; GO:0005667; GO:0006355; GO:0030154; GO:0043565; GO:0044212; GO:0045449	DNA; nucleus; transcription factor complex; regulation of transcription, DNA; cell differentiation; sequence; transcription regulatory region DNA binding	AT4G38620	ATMYB4; MYB4	myb domain protein 4	myb domain protein 4 myb domain protein 4	Potri.004G138000; Potri.005G112000; Potri.T144800; Potri.011G040300; Potri.004G174400; Potri.010G114000; Potri.009G134000; Potri.008G128500; Potri.006G221800
N1.HOG0000170	N1.HOG0000170_292	complete	0.0118834	Potra2n19c34420	Bpev01.c0639.g0015.m0001	FUN_030252-T1	PA_chr01_G002769	PS_chr01_G001824	PS_chr01_G001822	GO:0003700; GO:0005634; GO:0005667; GO:0006355; GO:0030154; GO:0043565; GO:0044212; GO:0045449	DNA; nucleus; transcription factor complex; regulation of transcription, DNA; cell differentiation; sequence; transcription regulatory region DNA binding	AT4G38620	ATMYB4; MYB4	myb domain protein 4	myb domain protein 4 myb domain protein 4	Potri.004G138000; Potri.005G112000; Potri.T144800; Potri.011G040300; Potri.004G174400; Potri.010G114000; Potri.009G134000; Potri.008G128500; Potri.006G221800
N1.HOG0000170	N1.HOG0000170_321	complete	0.0118834	Potra2n19c34420	Bpev01.c0549.g0004.m0001	FUN_030252-T1	PA_chr01_G002769	PS_chr04_G016676	PS_chr01_G001822	GO:0003700; GO:0005634; GO:0005667; GO:0006355; GO:0030154; GO:0043565; GO:0044212; GO:0045449	DNA; nucleus; transcription factor complex; regulation of transcription, DNA; cell differentiation; sequence; transcription regulatory region DNA binding	AT4G38620	ATMYB4; MYB4	myb domain protein 4	myb domain protein 4 myb domain protein 4	Potri.004G138000; Potri.005G112000; Potri.T144800; Potri.011G040300; Potri.004G174400; Potri.010G114000; Potri.009G134000; Potri.008G128500; Potri.006G221800
N1.HOG0000170	N1.HOG0000170_372	complete	0.0122124	Potra2n9c18946	Bpev01.c0639.g0015.m0001	FUN_007778-T1	PA_chr01_G003821	PS_chr01_G001822	PS_chr04_G016676	GO:0003700; GO:0005634; GO:0005667; GO:0006355; GO:0030154; GO:0043565; GO:0044212; GO:0045449	DNA; nucleus; transcription factor complex; regulation of transcription, DNA; cell differentiation; sequence; transcription regulatory region DNA binding	AT4G38620	ATMYB4; MYB4	myb domain protein 4	myb domain protein 4 myb domain protein 4	Potri.004G138000; Potri.005G112000; Potri.T144800; Potri.011G040300; Potri.004G174400; Potri.010G114000; Potri.009G134000; Potri.008G128500; Potri.006G221800
N1.HOG0000170	N1.HOG0000170_552	complete	0.0122201	Potra2n9c18946	Bpev01.c0639.g0015.m0001	FUN_007673-T1	PA_chr01_G003821	PS_chr01_G001822	PS_chr04_G016676	GO:0003700; GO:0005634; GO:0005667; GO:0006355; GO:0030154; GO:0043565; GO:0044212; GO:0045449	DNA; nucleus; transcription factor complex; regulation of transcription, DNA; cell differentiation; sequence; transcription regulatory region DNA binding	AT4G38620	ATMYB4; MYB4	myb domain protein 4	myb domain protein 4 myb domain protein 4	Potri.004G138000; Potri.005G112000; Potri.T144800; Potri.011G040300; Potri.004G174400; Potri.010G114000; Potri.009G134000; Potri.008G128500; Potri.006G221800
N1.HOG0000170	N1.HOG0000170_288	complete	0.0124685	Potra2n19c34420	Bpev01.c0639.g0015.m0001	FUN_030252-T1	PA_chr01_G002769	PS_chr04_G016676	PS_chr01_G001824	GO:0003700; GO:0005634; GO:0005667; GO:0006355; GO:0030154; GO:0043565; GO:0044212; GO:0045449	DNA; nucleus; transcription factor complex; regulation of transcription, DNA; cell differentiation; sequence; transcription regulatory region DNA binding	AT4G38620	ATMYB4; MYB4	myb domain protein 4	myb domain protein 4 myb domain protein 4	Potri.004G138000; Potri.005G112000; Potri.T144800; Potri.011G040300; Potri.004G174400; Potri.010G114000; Potri.009G134000; Potri.008G128500; Potri.006G221800
N1.HOG0000170	N1.HOG0000170_319	complete	0.0124685	Potra2n19c34420	Bpev01.c0549.g0004.m0001	FUN_030252-T1	PA_chr01_G002769	PS_chr01_G001824	PS_chr01_G001824	GO:0003700; GO:0005634; GO:0005667; GO:0006355; GO:0030154; GO:0043565; GO:0044212; GO:0045449	DNA; nucleus; transcription factor complex; regulation of transcription, DNA; cell differentiation; sequence; transcription regulatory region DNA binding	AT4G38620	ATMYB4; MYB4	myb domain protein 4	myb domain protein 4 myb domain protein 4	Potri.004G138000; Potri.005G112000; Potri.T144800; Potri.011G040300; Potri.004G174400; Potri.010G114000; Potri.009G134000; Potri.008G128500; Potri.006G221800
N1.HOG0000170	N1.HOG0000170_287	complete	0.0124685	Potra2n19c34420	Bpev01.c0639.g0015.m0001	FUN_030252-T1	PA_chr01_G002769	PS_chr01_G001818	PS_chr01_G001824	GO:0003700; GO:0005634; GO:0005667; GO:0006355; GO:0030154; GO:0043565; GO:0044212; GO:0045449	DNA; nucleus; transcription factor complex; regulation of transcription, DNA; cell differentiation; sequence; transcription regulatory region DNA binding	AT4G38620	ATMYB4; MYB4	myb domain protein 4	myb domain protein 4 myb domain protein 4	Potri.004G138000; Potri.005G112000; Potri.T144800; Potri.011G040300; Potri.004G174400; Potri.010G114000; Potri.009G134000; Potri.008G128500; Potri.006G221800
N1.HOG0000170	N1.HOG0000170_317	complete	0.0124685	Potra2n19c34420	Bpev01.c0549.g0004.m0001	FUN_030252-T1	PA_chr01_G002769	PS_chr01_G001818	PS_chr01_G001824	GO:0003700; GO:0005634; GO:0005667; GO:0006355; GO:0030154; GO:0043565; GO:0044212; GO:0045449	DNA; nucleus; transcription factor complex; regulation of transcription, DNA; cell differentiation; sequence; transcription regulatory region DNA binding	AT4G38620	ATMYB4; MYB4	myb domain protein 4	myb domain protein 4 myb domain protein 4	Potri.004G138000; Potri.005G112000; Potri.T144800; Potri.011G040300; Potri.004G174400; Potri.010G114000; Potri.009G134000; Potri.008G128500; Potri.006G221800
N1.HOG0000170	N1.HOG0000170_289	complete	0.0124685	Potra2n19c34420	Bpev01.c0639.g0015.m0001	FUN_030252-T1	PA_chr01_G002769	PS_chr01_G001824	PS_chr01_G001824	GO:0003700; GO:0005634; GO:0005667; GO:0006355; GO:0030154; GO:0043565; GO:0044212; GO:0045449	DNA; nucleus; transcription factor complex; regulation of transcription, DNA; cell differentiation; sequence; transcription regulatory region DNA binding	AT4G38620	ATMYB4; MYB4	myb domain protein 4	myb domain protein 4 myb domain protein 4	Potri.004G138000; Potri.005G112000; Potri.T144800; Potri.011G040300; Potri.004G174400; Potri.010G114000; Potri.009G134000; Potri.008G128500; Potri.006G221800
N1.HOG0000170	N1.HOG0000170_318	complete	0.0124685	Potra2n19c34420	Bpev01.c0549.g0004.m0001	FUN_030252-T1	PA_chr01_G002769	PS_chr04_G016676	PS_chr01_G001824	GO:0003700; GO:0005634; GO:0005667; GO:0006355; GO:0030154; GO:0043565; GO:0044212; GO:0045449	DNA; nucleus; transcription factor complex; regulation of transcription, DNA; cell differentiation; sequence; transcription regulatory region DNA binding	AT4G38620	ATMYB4; MYB4	myb domain protein 4	myb domain protein 4 myb domain protein 4	Potri.004G138000; Potri.005G112000; Potri.T144800; Potri.011G040300; Potri.004G174400; Potri.010G114000; Potri.009G134000; Potri.008G128500; Potri.006G221800
N1.HOG0000170	N1.HOG0000170_384	complete	0.0130668	Potra2n9c18946	Bpev01.c0549.g0004.m0001	FUN_007778-T1	PA_chr01_G003821	PS_chr01_G001824	PS_chr01_G001822	GO:0003700; GO:0005634; GO:0005667; GO:0006355; GO:0030154; GO:0043565; GO:0044212; GO:0045449	DNA; nucleus; transcription factor complex; regulation of transcription, DNA; cell differentiation; sequence; transcription regulatory region DNA binding	AT4G38620	ATMYB4; MYB4	myb domain protein 4	myb domain protein 4 myb domain protein 4	Potri.004G138000; Potri.005G112000; Potri.T144800; Potri.011G040300; Potri.004G174400; Potri.010G114000; Potri.009G134000; Potri.008G128500; Potri.006G221800
N1.HOG0000170	N1.HOG0000170_348	complete	0.0130668	Potra2n9c18946	Bpev01.c0639.g0015.m0001	FUN_007778-T1	PA_chr01_G003821	PS_chr01_G001824	PS_chr01_G001822	GO:0003700; GO:0005634; GO:0005667; GO:0006355; GO:0030154; GO:0043565; GO:0044212; GO:0045449	DNA; nucleus; transcription factor complex; regulation of transcription, DNA; cell differentiation; sequence; transcription regulatory region DNA binding	AT4G38620	ATMYB4; MYB4	myb domain protein 4	myb domain protein 4 myb domain protein 4	Potri.004G138000; Potri.005G112000; Potri.T144800; Potri.011G040300; Potri.004G174400; Potri.010G114000; Potri.009G134000; Potri.008G128500; Potri.006G221800
N1.HOG0000170	N1.HOG0000170_570	complete	0.0130672	Potra2n9c18946	Bpev01.c0549.g0004.m0001	FUN_007673-T1	PA_chr01_G003821	PS_chr01_G001824	PS_chr01_G001822	GO:0003700; GO:0005634; GO:0005667; GO:0006355; GO:0030154; GO:0043565; GO:0044212; GO:0045449	DNA; nucleus; transcription factor complex; regulation of transcription, DNA; cell differentiation; sequence; transcription regulatory region DNA binding	AT4G38620	ATMYB4; MYB4	myb domain protein 4	myb domain protein 4 myb domain protein 4	Potri.004G138000; Potri.005G112000; Potri.T144800; Potri.011G040300; Potri.004G174400; Potri.010G114000; Potri.009G134000; Potri.008G128500; Potri.006G221800
N1.HOG0000170	N1.HOG0000170_510	complete	0.0130673	Potra2n9c18946	Bpev01.c0639.g0015.m0001	FUN_007673-T1	PA_chr01_G003821	PS_chr01_G001824	PS_chr01_G001822	GO:0003700; GO:0005634; GO:0005667; GO:0006355; GO:0030154; GO:0043565; GO:0044212; GO:0045449	DNA; nucleus; transcription factor complex; regulation of transcription, DNA; cell differentiation; sequence; transcription regulatory region DNA binding	AT4G38620	ATMYB4; MYB4	myb domain protein 4	myb domain protein 4 myb domain protein 4	Potri.004G138000; Potri.005G112000; Potri.T144800; Potri.011G040300; Potri.004G174400; Potri.010G114000; Potri.009G134000; Potri.008G128500; Potri.006G221800
N1.HOG0000170	N1.HOG0000170_558	complete	0.0130676	Potra2n9c18946	Bpev01.c0549.g0004.m0001	FUN_007673-T1	PA_chr01_G003821	PS_chr01_G001818	PS_chr01_G001822	GO:0003700; GO:0005634; GO:0005667; GO:0006355; GO:0030154; GO:0043565; GO:0044212; GO:0045449	DNA; nucleus; transcription factor complex; regulation of transcription, DNA; cell differentiation; sequence; transcription regulatory region DNA binding	AT4G38620	ATMYB4; MYB4	myb domain protein 4	myb domain protein 4 myb domain protein 4	Potri.004G138000; Potri.005G112000; Potri.T144800; Potri.011G040300; Potri.004G174400; Potri.010G114000; Potri.009G134000; Potri.008G128500; Potri.006G221800
N1.HOG0000170	N1.HOG0000170_498	complete	0.0130677	Potra2n9c18946	Bpev01.c0639.g0015.m0001	FUN_007673-T1	PA_chr01_G003821	PS_chr01_G001818	PS_chr01_G001822	GO:0003700; GO:0005634; GO:0005667; GO:0006355; GO:0030154; GO:0043565; GO:0044212; GO:0045449	DNA; nucleus; transcription factor complex; regulation of transcription, DNA; cell differentiation; sequence; transcription regulatory region DNA binding	AT4G38620	ATMYB4; MYB4	myb domain protein 4	myb domain protein 4 myb domain protein 4	Potri.004G138000; Potri.005G112000; Potri.T144800; Potri.011G040300; Potri.004G174400; Potri.010G114000; Potri.009G134000; Potri.008G128500; Potri.006G221800
N1.HOG0000170	N1.HOG0000170_360	complete	0.0131113	Potra2n9c18946	Bpev01.c0639.g0015.m0001	FUN_007778-T1	PA_chr01_G003821	PS_chr01_G001822	PS_chr01_G001822	GO:0003700; GO:0005634; GO:0005667; GO:0006355; GO:0030154; GO:0043565; GO:0044212; GO:0045449	DNA; nucleus; transcription factor complex; regulation of transcription, DNA; cell differentiation; sequence; transcription regulatory region DNA binding	AT4G38620	ATMYB4; MYB4	myb domain protein 4	myb domain protein 4 myb domain protein 4	Potri.004G138000; Potri.005G112000; Potri.T144800; Potri.011G040300; Potri.004G174400; Potri.010G114000; Potri.009G134000; Potri.008G128500; Potri.006G221800
N1.HOG0000170	N1.HOG0000170_516	complete	0.0131119	Potra2n9c18946	Bpev01.c0639.g0015.m0001	FUN_007673-T1	PA_chr01_G003821	PS_chr01_G001822	PS_chr01_G001822	GO:0003700; GO:0005634; GO:0005667; GO:0006355; GO:0030154; GO:0043565; GO:0044212; GO:0045449	DNA; nucleus; transcription factor complex; regulation of transcription, DNA; cell differentiation; sequence; transcription regulatory region DNA binding	AT4G38620	ATMYB4; MYB4	myb domain protein 4	myb domain protein 4 myb domain protein 4	Potri.004G138000; Potri.005G112000; Potri.T144800; Potri.011G040300; Potri.004G174400; Potri.010G114000; Potri.009G134000; Potri.008G128500; Potri.006G221800
N1.HOG0000170	N1.HOG0000170_390	complete	0.0131126	Potra2n9c18946	Bpev01.c0549.g0004.m0001	FUN_007778-T1	PA_chr01_G003821	PS_chr01_G001822	PS_chr01_G001822	GO:0003700; GO:0005634; GO:0005667; GO:0006355; GO:0030154; GO:0043565; GO:0044212; GO:0045449	DNA; nucleus; transcription factor complex; regulation of transcription, DNA; cell differentiation; sequence; transcription regulatory region DNA binding	AT4G38620	ATMYB4; MYB4	myb domain protein 4	myb domain protein 4 myb domain protein 4	Potri.004G138000; Potri.005G112000; Potri.T144800; Potri.011G040300; Potri.004G174400; Potri.010G114000; Potri.009G134000; Potri.008G128500; Potri.006G221800
N1.HOG0000170	N1.HOG0000170_576	complete	0.013113	Potra2n9c18946	Bpev01.c0549.g0004.m0001	FUN_007673-T1	PA_chr01_G003821	PS_chr01_G001822	PS_chr01_G001822	GO:0003700; GO:0005634; GO:0005667; GO:0006355; GO:0030154; GO:0043565; GO:0044212; GO:0045449	DNA; nucleus; transcription factor complex; regulation of transcription, DNA; cell differentiation; sequence; transcription regulatory region DNA binding	AT4G38620	ATMYB4; MYB4	myb domain protein 4	myb domain protein 4 myb domain protein 4	Potri.004G138000; Potri.005G112000; Potri.T144800; Potri.011G040300; Potri.004G174400; Potri.010G114000; Potri.009G134000; Potri.008G128500; Potri.006G221800
N1.HOG0000170	N1.HOG0000170_324	complete	0.0133501	Potra2n19c34420	Bpev01.c0549.g0004.m0001	FUN_030252-T1	PA_chr01_G002769	PS_chr01_G001824	PS_chr01_G001817	GO:0003700; GO:0005634; GO:0005667; GO:0006355; GO:0030154; GO:0043565; GO:0044212; GO:0045449	DNA; nucleus; transcription factor complex; regulation of transcription, DNA; cell differentiation; sequence; transcription regulatory region DNA binding	AT4G38620	ATMYB4; MYB4	myb domain protein 4	myb domain protein 4 myb domain protein 4	Potri.004G138000; Potri.005G112000; Potri.T144800; Potri.011G040300; Potri.004G174400; Potri.010G114000; Potri.009G134000; Potri.008G128500; Potri.006G221800
N1.HOG0000170	N1.HOG0000170_293	complete	0.0133501	Potra2n19c34420	Bpev01.c0639.g0015.m0001	FUN_030252-T1	PA_chr01_G002769	PS_chr01_G001818	PS_chr01_G001817	GO:0003700; GO:0005634; GO:0005667; GO:0006355; GO:0030154; GO:0043565; GO:0044212; GO:0045449	DNA; nucleus; transcription factor complex; regulation of transcription, DNA; cell differentiation; sequence; transcription regulatory region DNA binding	AT4G38620	ATMYB4; MYB4	myb domain protein 4	myb domain protein 4 myb domain protein 4	Potri.004G138000; Potri.005G112000; Potri.T144800; Potri.011G040300; Potri.004G174400; Potri.010G114000; Potri.009G134000; Potri.008G128500; Potri.006G221800
N1.HOG0000170	N1.HOG0000170_323	complete	0.0133501	Potra2n19c34420	Bpev01.c0549.g0004.m0001	FUN_030252-T1	PA_chr01_G002769	PS_chr01_G001818	PS_chr01_G001817	GO:0003700; GO:0005634; GO:0005667; GO:0006355; GO:0030154; GO:0043565; GO:0044212; GO:0045449	DNA; nucleus; transcription factor complex; regulation of transcription, DNA; cell differentiation; sequence; transcription regulatory region DNA binding	AT4G38620	ATMYB4; MYB4	myb domain protein 4	myb domain protein 4 myb domain protein 4	Potri.004G138000; Potri.005G112000; Potri.T144800; Potri.011G040300; Potri.004G174400; Potri.010G114000; Potri.009G134000; Potri.008G128500; Potri.006G221800
N1.HOG0000170	N1.HOG0000170_294	complete	0.0133501	Potra2n19c34420	Bpev01.c0639.g0015.m0001	FUN_030252-T1	PA_chr01_G002769	PS_chr01_G001824	PS_chr01_G001817	GO:0003700; GO:0005634; GO:0005667; GO:0006355; GO:0030154; GO:0043565; GO:0044212; GO:0045449	DNA; nucleus; transcription factor complex; regulation of transcription, DNA; cell differentiation; sequence; transcription regulatory region DNA binding	AT4G38620	ATMYB4; MYB4	myb domain protein 4	myb domain protein 4 myb domain protein 4	Potri.004G138000; Potri.005G112000; Potri.T144800; Potri.011G040300; Potri.004G174400; Potri.010G114000; Potri.009G134000; Potri.008G128500; Potri.006G221800
N1.HOG0000170	N1.HOG0000170_248	complete	0.0148682	Potra2n4c9673	Bpev01.c0549.g0004.m0001	FUN_030252-T1	PA_chr04_G002634	PS_chr01_G001824	PS_chr01_G001822	GO:0003700; GO:0005634; GO:0005667; GO:0006355; GO:0030154; GO:0043565; GO:0044212; GO:0045449	DNA; nucleus; transcription factor complex; regulation of transcription, DNA; cell differentiation; sequence; transcription regulatory region DNA binding	AT4G38620	ATMYB4; MYB4	myb domain protein 4	myb domain protein 4 myb domain protein 4	Potri.004G138000; Potri.005G112000; Potri.T144800; Potri.011G040300; Potri.004G174400; Potri.010G114000; Potri.009G134000; Potri.008G128500; Potri.006G221800
N1.HOG0000170	N1.HOG0000170_215	complete	0.0148682	Potra2n4c9673	Bpev01.c0639.g0015.m0001	FUN_030252-T1	PA_chr04_G002634	PS_chr01_G001824	PS_chr01_G001822	GO:0003700; GO:0005634; GO:0005667; GO:0006355; GO:0030154; GO:0043565; GO:0044212; GO:0045449	DNA; nucleus; transcription factor complex; regulation of transcription, DNA; cell differentiation; sequence; transcription regulatory region DNA binding	AT4G38620	ATMYB4; MYB4	myb domain protein 4	myb domain protein 4 myb domain protein 4	Potri.004G138000; Potri.005G112000; Potri.T144800; Potri.011G040300; Potri.004G174400; Potri.010G114000; Potri.009G134000; Potri.008G128500; Potri.006G221800
N1.HOG0000170	N1.HOG0000170_467	complete	0.0148683	Potra2n4c9673	Bpev01.c0549.g0004.m0001	FUN_007778-T1	PA_chr04_G002634	PS_chr01_G001824	PS_chr01_G001822	GO:0003700; GO:0005634; GO:0005667; GO:0006355; GO:0030154; GO:0043565; GO:0044212; GO:0045449	DNA; nucleus; transcription factor complex; regulation of transcription, DNA; cell differentiation; sequence; transcription regulatory region DNA binding	AT4G38620	ATMYB4; MYB4	myb domain protein 4	myb domain protein 4 myb domain protein 4	Potri.004G138000; Potri.005G112000; Potri.T144800; Potri.011G040300; Potri.004G174400; Potri.010G114000; Potri.009G134000; Potri.008G128500; Potri.006G221800
N1.HOG0000170	N1.HOG0000170_431	complete	0.0148683	Potra2n4c9673	Bpev01.c0639.g0015.m0001	FUN_007778-T1	PA_chr04_G002634	PS_chr01_G001824	PS_chr01_G001822	GO:0003700; GO:0005634; GO:0005667; GO:0006355; GO:0030154; GO:0043565; GO:0044212; GO:0045449	DNA; nucleus; transcription factor complex; regulation of transcription, DNA; cell differentiation; sequence; transcription regulatory region DNA binding	AT4G38620	ATMYB4; MYB4	myb domain protein 4	myb domain protein 4 myb domain protein 4	Potri.004G138000; Potri.005G112000; Potri.T144800; Potri.011G040300; Potri.004G174400; Potri.010G114000; Potri.009G134000; Potri.008G128500; Potri.006G221800
N1.HOG0000170	N1.HOG0000170_677	complete	0.0148687	Potra2n4c9673	Bpev01.c0549.g0004.m0001	FUN_007673-T1	PA_chr04_G002634	PS_chr01_G001824	PS_chr01_G001822	GO:0003700; GO:0005634; GO:0005667; GO:0006355; GO:0030154; GO:0043565; GO:0044212; GO:0045449	DNA; nucleus; transcription factor complex; regulation of transcription, DNA; cell differentiation; sequence; transcription regulatory region DNA binding	AT4G38620	ATMYB4; MYB4	myb domain protein 4	myb domain protein 4 myb domain protein 4	Potri.004G138000; Potri.005G112000; Potri.T144800; Potri.011G040300; Potri.004G174400; Potri.010G114000; Potri.009G134000; Potri.008G128500; Potri.006G221800
N1.HOG0000170	N1.HOG0000170_617	complete	0.0148688	Potra2n4c9673	Bpev01.c0639.g0015.m0001	FUN_007673-T1	PA_chr04_G002634	PS_chr01_G001824	PS_chr01_G001822	GO:0003700; GO:0005634; GO:0005667; GO:0006355; GO:0030154; GO:0043565; GO:0044212; GO:0045449	DNA; nucleus; transcription factor complex; regulation of transcription, DNA; cell differentiation; sequence; transcription regulatory region DNA binding	AT4G38620	ATMYB4; MYB4	myb domain protein 4	myb domain protein 4 myb domain protein 4	Potri.004G138000; Potri.005G112000; Potri.T144800; Potri.011G040300; Potri.004G174400; Potri.010G114000; Potri.009G134000; Potri.008G128500; Potri.006G221800
N1.HOG0000170	N1.HOG0000170_485	complete	0.0149028	Potra2n4c9673	Bpev01.c0549.g0004.m0001	FUN_007778-T1	PA_chr04_G002634	PS_chr01_G001824	PS_chr01_G001824	GO:0003700; GO:0005634; GO:0005667; GO:0006355; GO:0030154; GO:0043565; GO:0044212; GO:0045449	DNA; nucleus; transcription factor complex; regulation of transcription, DNA; cell differentiation; sequence; transcription regulatory region DNA binding	AT4G38620	ATMYB4; MYB4	myb domain protein 4	myb domain protein 4 myb domain protein 4	Potri.004G138000; Potri.005G112000; Potri.T144800; Potri.011G040300; Potri.004G174400; Potri.010G114000; Potri.009G134000; Potri.008G128500; Potri.006G221800
N1.HOG0000170	N1.HOG0000170_437	complete	0.0149028	Potra2n4c9673	Bpev01.c0639.g0015.m0001	FUN_007778-T1	PA_chr04_G002634	PS_chr01_G001824	PS_chr01_G001824	GO:0003700; GO:0005634; GO:0005667; GO:0006355; GO:0030154; GO:0043565; GO:0044212; GO:0045449	DNA; nucleus; transcription factor complex; regulation of transcription, DNA; cell differentiation; sequence; transcription regulatory region DNA binding	AT4G38620	ATMYB4; MYB4	myb domain protein 4	myb domain protein 4 myb domain protein 4	Potri.004G138000; Potri.005G112000; Potri.T144800; Potri.011G040300; Potri.004G174400; Potri.010G114000; Potri.009G134000; Potri.008G128500; Potri.006G221800
N1.HOG0000170	N1.HOG0000170_701	complete	0.0149029	Potra2n4c9673	Bpev01.c0549.g0004.m0001	FUN_007673-T1	PA_chr04_G002634	PS_chr01_G001824	PS_chr01_G001824	GO:0003700; GO:0005634; GO:0005667; GO:0006355; GO:0030154; GO:0043565; GO:0044212; GO:0045449	DNA; nucleus; transcription factor complex; regulation of transcription, DNA; cell differentiation; sequence; transcription regulatory region DNA binding	AT4G38620	ATMYB4; MYB4	myb domain protein 4	myb domain protein 4 myb domain protein 4	Potri.004G138000; Potri.005G112000; Potri.T144800; Potri.011G040300; Potri.004G174400; Potri.010G114000; Potri.009G134000; Potri.008G128500; Potri.006G221800
N1.HOG0000170	N1.HOG0000170_259	complete	0.0149029	Potra2n4c9673	Bpev01.c0549.g0004.m0001	FUN_030252-T1	PA_chr04_G002634	PS_chr01_G001824	PS_chr01_G001824	GO:0003700; GO:0005634; GO:0005667; GO:0006355; GO:0030154; GO:0043565; GO:0044212; GO:0045449	DNA; nucleus; transcription factor complex; regulation of transcription, DNA; cell differentiation; sequence; transcription regulatory region DNA binding	AT4G38620	ATMYB4; MYB4	myb domain protein 4	myb domain protein 4 myb domain protein 4	Potri.004G138000; Potri.005G112000; Potri.T144800; Potri.011G040300; Potri.004G174400; Potri.010G114000; Potri.009G134000; Potri.008G128500; Potri.006G221800
N1.HOG0000170	N1.HOG0000170_219	complete	0.0149029	Potra2n4c9673	Bpev01.c0639.g0015.m0001	FUN_030252-T1	PA_chr04_G002634	PS_chr01_G001824	PS_chr01_G001824	GO:0003700; GO:0005634; GO:0005667; GO:0006355; GO:0030154; GO:0043565; GO:0044212; GO:0045449	DNA; nucleus; transcription factor complex; regulation of transcription, DNA; cell differentiation; sequence; transcription regulatory region DNA binding	AT4G38620	ATMYB4; MYB4	myb domain protein 4	myb domain protein 4 myb domain protein 4	Potri.004G138000; Potri.005G112000; Potri.T144800; Potri.011G040300; Potri.004G174400; Potri.010G114000; Potri.009G134000; Potri.008G128500; Potri.006G221800
N1.HOG0000170	N1.HOG0000170_641	complete	0.014903	Potra2n4c9673	Bpev01.c0639.g0015.m0001	FUN_007673-T1	PA_chr04_G002634	PS_chr01_G001824	PS_chr01_G001824	GO:0003700; GO:0005634; GO:0005667; GO:0006355; GO:0030154; GO:0043565; GO:0044212; GO:0045449	DNA; nucleus; transcription factor complex; regulation of transcription, DNA; cell differentiation; sequence; transcription regulatory region DNA binding	AT4G38620	ATMYB4; MYB4	myb domain protein 4	myb domain protein 4 myb domain protein 4	Potri.004G138000; Potri.005G112000; Potri.T144800; Potri.011G040300; Potri.004G174400; Potri.010G114000; Potri.009G134000; Potri.008G128500; Potri.006G221800
N1.HOG0000170	N1.HOG0000170_245	complete	0.0156434	Potra2n19c34420	Bpev01.c0549.g0004.m0001	FUN_030252-T1	PA_chr04_G002634	PS_chr01_G001824	PS_chr01_G001822	GO:0003700; GO:0005634; GO:0005667; GO:0006355; GO:0030154; GO:0043565; GO:0044212; GO:0045449	DNA; nucleus; transcription factor complex; regulation of transcription, DNA; cell differentiation; sequence; transcription regulatory region DNA binding	AT4G38620	ATMYB4; MYB4	myb domain protein 4	myb domain protein 4 myb domain protein 4	Potri.004G138000; Potri.005G112000; Potri.T144800; Potri.011G040300; Potri.004G174400; Potri.010G114000; Potri.009G134000; Potri.008G128500; Potri.006G221800
N1.HOG0000170	N1.HOG0000170_235	complete	0.0156434	Potra2n19c34420	Bpev01.c0639.g0015.m0001	FUN_030252-T1	PA_chr04_G002634	PS_chr01_G001824	PS_chr01_G001822	GO:0003700; GO:0005634; GO:0005667; GO:0006355; GO:0030154; GO:0043565; GO:0044212; GO:0045449	DNA; nucleus; transcription factor complex; regulation of transcription, DNA; cell differentiation; sequence; transcription regulatory region DNA binding	AT4G38620	ATMYB4; MYB4	myb domain protein 4	myb domain protein 4 myb domain protein 4	Potri.004G138000; Potri.005G112000; Potri.T144800; Potri.011G040300; Potri.004G174400; Potri.010G114000; Potri.009G134000; Potri.008G128500; Potri.006G221800
N1.HOG0000170	N1.HOG0000170_256	complete	0.0162285	Potra2n19c34420	Bpev01.c0549.g0004.m0001	FUN_030252-T1	PA_chr04_G002634	PS_chr01_G001824	PS_chr01_G001824	GO:0003700; GO:0005634; GO:0005667; GO:0006355; GO:0030154; GO:0043565; GO:0044212; GO:0045449	DNA; nucleus; transcription factor complex; regulation of transcription, DNA; cell differentiation; sequence; transcription regulatory region DNA binding	AT4G38620	ATMYB4; MYB4	myb domain protein 4	myb domain protein 4 myb domain protein 4	Potri.004G138000; Potri.005G112000; Potri.T144800; Potri.011G040300; Potri.004G174400; Potri.010G114000; Potri.009G134000; Potri.008G128500; Potri.006G221800
N1.HOG0000170	N1.HOG0000170_238	complete	0.0162285	Potra2n19c34420	Bpev01.c0639.g0015.m0001	FUN_030252-T1	PA_chr04_G002634	PS_chr01_G001824	PS_chr01_G001824	GO:0003700; GO:0005634; GO:0005667; GO:0006355; GO:0030154; GO:0043565; GO:0044212; GO:0045449	DNA; nucleus; transcription factor complex; regulation of transcription, DNA; cell differentiation; sequence; transcription regulatory region DNA binding	AT4G38620	ATMYB4; MYB4	myb domain protein 4	myb domain protein 4 myb domain protein 4	Potri.004G138000; Potri.005G112000; Potri.T144800; Potri.011G040300; Potri.004G174400; Potri.010G114000; Potri.009G134000; Potri.008G128500; Potri.006G221800
N1.HOG0000170	N1.HOG0000170_157	complete	0.0162548	Potra2n4c9673	Bpev01.c0549.g0004.m0001	FUN_030252-T1	PA_chr01_G002769	PS_chr01_G001824	PS_chr01_G001821	GO:0003700; GO:0005634; GO:0005667; GO:0006355; GO:0030154; GO:0043565; GO:0044212; GO:0045449	DNA; nucleus; transcription factor complex; regulation of transcription, DNA; cell differentiation; sequence; transcription regulatory region DNA binding	AT4G38620	ATMYB4; MYB4	myb domain protein 4	myb domain protein 4 myb domain protein 4	Potri.004G138000; Potri.005G112000; Potri.T144800; Potri.011G040300; Potri.004G174400; Potri.010G114000; Potri.009G134000; Potri.008G128500; Potri.006G221800
N1.HOG0000170	N1.HOG0000170_152	complete	0.0162548	Potra2n4c9673	Bpev01.c0549.g0004.m0001	FUN_030252-T1	PA_chr01_G002769	PS_chr01_G001818	PS_chr01_G001821	GO:0003700; GO:0005634; GO:0005667; GO:0006355; GO:0030154; GO:0043565; GO:0044212; GO:0045449	DNA; nucleus; transcription factor complex; regulation of transcription, DNA; cell differentiation; sequence; transcription regulatory region DNA binding	AT4G38620	ATMYB4; MYB4	myb domain protein 4	myb domain protein 4 myb domain protein 4	Potri.004G138000; Potri.005G112000; Potri.T144800; Potri.011G040300; Potri.004G174400; Potri.010G114000; Potri.009G134000; Potri.008G128500; Potri.006G221800
N1.HOG0000170	N1.HOG0000170_162	complete	0.0162563	Potra2n4c9673	Bpev01.c0549.g0004.m0001	FUN_030252-T1	PA_chr01_G002769	PS_chr01_G001822	PS_chr01_G001821	GO:0003700; GO:0005634; GO:0005667; GO:0006355; GO:0030154; GO:0043565; GO:0044212; GO:0045449	DNA; nucleus; transcription factor complex; regulation of transcription, DNA; cell differentiation; sequence; transcription regulatory region DNA binding	AT4G38620	ATMYB4; MYB4	myb domain protein 4	myb domain protein 4 myb domain protein 4	Potri.004G138000; Potri.005G112000; Potri.T144800; Potri.011G040300; Potri.004G174400; Potri.010G114000; Potri.009G134000; Potri.008G128500; Potri.006G221800
N1.HOG0000170	N1.HOG0000170_401	complete	0.0162775	Potra2n9c18946	Bpev01.c0549.g0004.m0001	FUN_007778-T1	PA_chr04_G002634	PS_chr01_G001824	PS_chr01_G001824	GO:0003700; GO:0005634; GO:0005667; GO:0006355; GO:0030154; GO:0043565; GO:0044212; GO:0045449	DNA; nucleus; transcription factor complex; regulation of transcription, DNA; cell differentiation; sequence; transcription regulatory region DNA binding	AT4G38620	ATMYB4; MYB4	myb domain protein 4	myb domain protein 4 myb domain protein 4	Potri.004G138000; Potri.005G112000; Potri.T144800; Potri.011G040300; Potri.004G174400; Potri.010G114000; Potri.009G134000; Potri.008G128500; Potri.006G221800
N1.HOG0000170	N1.HOG0000170_353	complete	0.0162775	Potra2n9c18946	Bpev01.c0639.g0015.m0001	FUN_007778-T1	PA_chr04_G002634	PS_chr01_G001824	PS_chr01_G001824	GO:0003700; GO:0005634; GO:0005667; GO:0006355; GO:0030154; GO:0043565; GO:0044212; GO:0045449	DNA; nucleus; transcription factor complex; regulation of transcription, DNA; cell differentiation; sequence; transcription regulatory region DNA binding	AT4G38620	ATMYB4; MYB4	myb domain protein 4	myb domain protein 4 myb domain protein 4	Potri.004G138000; Potri.005G112000; Potri.T144800; Potri.011G040300; Potri.004G174400; Potri.010G114000; Potri.009G134000; Potri.008G128500; Potri.006G221800
N1.HOG0000170	N1.HOG0000170_593	complete	0.0162776	Potra2n9c18946	Bpev01.c0549.g0004.m0001	FUN_007673-T1	PA_chr04_G002634	PS_chr01_G001824	PS_chr01_G001824	GO:0003700; GO:0005634; GO:0005667; GO:0006355; GO:0030154; GO:0043565; GO:0044212; GO:0045449	DNA; nucleus; transcription factor complex; regulation of transcription, DNA; cell differentiation; sequence; transcription regulatory region DNA binding	AT4G38620	ATMYB4; MYB4	myb domain protein 4	myb domain protein 4 myb domain protein 4	Potri.004G138000; Potri.005G112000; Potri.T144800; Potri.011G040300; Potri.004G174400; Potri.010G114000; Potri.009G134000; Potri.008G128500; Potri.006G221800
N1.HOG0000170	N1.HOG0000170_252	complete	0.0162776	Potra2n9c18946	Bpev01.c0549.g0004.m0001	FUN_030252-T1	PA_chr04_G002634	PS_chr01_G001824	PS_chr01_G001824	GO:0003700; GO:0005634; GO:0005667; GO:0006355; GO:0030154; GO:0043565; GO:0044212; GO:0045449	DNA; nucleus; transcription factor complex; regulation of transcription, DNA; cell differentiation; sequence; transcription regulatory region DNA binding	AT4G38620	ATMYB4; MYB4	myb domain protein 4	myb domain protein 4 myb domain protein 4	Potri.004G138000; Potri.005G112000; Potri.T144800; Potri.011G040300; Potri.004G174400; Potri.010G114000; Potri.009G134000; Potri.008G128500; Potri.006G221800
N1.HOG0000170	N1.HOG0000170_229	complete	0.0162776	Potra2n9c18946	Bpev01.c0639.g0015.m0001	FUN_030252-T1	PA_chr04_G002634	PS_chr01_G001824	PS_chr01_G001824	GO:0003700; GO:0005634; GO:0005667; GO:0006355; GO:0030154; GO:0043565; GO:0044212; GO:0045449	DNA; nucleus; transcription factor complex; regulation of transcription, DNA; cell differentiation; sequence; transcription regulatory region DNA binding	AT4G38620	ATMYB4; MYB4	myb domain protein 4	myb domain protein 4 myb domain protein 4	Potri.004G138000; Potri.005G112000; Potri.T144800; Potri.011G040300; Potri.004G174400; Potri.010G114000; Potri.009G134000; Potri.008G128500; Potri.006G221800
N1.HOG0000170	N1.HOG0000170_533	complete	0.0162777	Potra2n9c18946	Bpev01.c0639.g0015.m0001	FUN_007673-T1	PA_chr04_G002634	PS_chr01_G001824	PS_chr01_G001824	GO:0003700; GO:0005634; GO:0005667; GO:0006355; GO:0030154; GO:0043565; GO:0044212; GO:0045449	DNA; nucleus; transcription factor complex; regulation of transcription, DNA; cell differentiation; sequence; transcription regulatory region DNA binding	AT4G38620	ATMYB4; MYB4	myb domain protein 4	myb domain protein 4 myb domain protein 4	Potri.004G138000; Potri.005G112000; Potri.T144800; Potri.011G040300; Potri.004G174400; Potri.010G114000; Potri.009G134000; Potri.008G128500; Potri.006G221800
N1.HOG0000170	N1.HOG0000170_462	complete	0.0188014	Potra2n4c9673	Bpev01.c0549.g0004.m0001	FUN_007778-T1	PA_chr01_G003821	PS_chr04_G016676	PS_chr01_G001822	GO:0003700; GO:0005634; GO:0005667; GO:0006355; GO:0030154; GO:0043565; GO:0044212; GO:0045449	DNA; nucleus; transcription factor complex; regulation of transcription, DNA; cell differentiation; sequence; transcription regulatory region DNA binding	AT4G38620	ATMYB4; MYB4	myb domain protein 4	myb domain protein 4 myb domain protein 4	Potri.004G138000; Potri.005G112000; Potri.T144800; Potri.011G040300; Potri.004G174400; Potri.010G114000; Potri.009G134000; Potri.008G128500; Potri.006G221800
N1.HOG0000170	N1.HOG0000170_414	complete	0.0188014	Potra2n4c9673	Bpev01.c0639.g0015.m0001	FUN_007778-T1	PA_chr01_G003821	PS_chr04_G016676	PS_chr01_G001822	GO:0003700; GO:0005634; GO:0005667; GO:0006355; GO:0030154; GO:0043565; GO:0044212; GO:0045449	DNA; nucleus; transcription factor complex; regulation of transcription, DNA; cell differentiation; sequence; transcription regulatory region DNA binding	AT4G38620	ATMYB4; MYB4	myb domain protein 4	myb domain protein 4 myb domain protein 4	Potri.004G138000; Potri.005G112000; Potri.T144800; Potri.011G040300; Potri.004G174400; Potri.010G114000; Potri.009G134000; Potri.008G128500; Potri.006G221800
N1.HOG0000170	N1.HOG0000170_672	complete	0.0188018	Potra2n4c9673	Bpev01.c0549.g0004.m0001	FUN_007673-T1	PA_chr01_G003821	PS_chr04_G016676	PS_chr01_G001822	GO:0003700; GO:0005634; GO:0005667; GO:0006355; GO:0030154; GO:0043565; GO:0044212; GO:0045449	DNA; nucleus; transcription factor complex; regulation of transcription, DNA; cell differentiation; sequence; transcription regulatory region DNA binding	AT4G38620	ATMYB4; MYB4	myb domain protein 4	myb domain protein 4 myb domain protein 4	Potri.004G138000; Potri.005G112000; Potri.T144800; Potri.011G040300; Potri.004G174400; Potri.010G114000; Potri.009G134000; Potri.008G128500; Potri.006G221800
N1.HOG0000170	N1.HOG0000170_612	complete	0.0188019	Potra2n4c9673	Bpev01.c0639.g0015.m0001	FUN_007673-T1	PA_chr01_G003821	PS_chr04_G016676	PS_chr01_G001822	GO:0003700; GO:0005634; GO:0005667; GO:0006355; GO:0030154; GO:0043565; GO:0044212; GO:0045449	DNA; nucleus; transcription factor complex; regulation of transcription, DNA; cell differentiation; sequence; transcription regulatory region DNA binding	AT4G38620	ATMYB4; MYB4	myb domain protein 4	myb domain protein 4 myb domain protein 4	Potri.004G138000; Potri.005G112000; Potri.T144800; Potri.011G040300; Potri.004G174400; Potri.010G114000; Potri.009G134000; Potri.008G128500; Potri.006G221800
N1.HOG0000170	N1.HOG0000170_480	complete	0.0188359	Potra2n4c9673	Bpev01.c0549.g0004.m0001	FUN_007778-T1	PA_chr01_G003821	PS_chr04_G016676	PS_chr01_G001824	GO:0003700; GO:0005634; GO:0005667; GO:0006355; GO:0030154; GO:0043565; GO:0044212; GO:0045449	DNA; nucleus; transcription factor complex; regulation of transcription, DNA; cell differentiation; sequence; transcription regulatory region DNA binding	AT4G38620	ATMYB4; MYB4	myb domain protein 4	myb domain protein 4 myb domain protein 4	Potri.004G138000; Potri.005G112000; Potri.T144800; Potri.011G040300; Potri.004G174400; Potri.010G114000; Potri.009G134000; Potri.008G128500; Potri.006G221800
N1.HOG0000170	N1.HOG0000170_420	complete	0.0188359	Potra2n4c9673	Bpev01.c0639.g0015.m0001	FUN_007778-T1	PA_chr01_G003821	PS_chr04_G016676	PS_chr01_G001824	GO:0003700; GO:0005634; GO:0005667; GO:0006355; GO:0030154; GO:0043565; GO:0044212; GO:0045449	DNA; nucleus; transcription factor complex; regulation of transcription, DNA; cell differentiation; sequence; transcription regulatory region DNA binding	AT4G38620	ATMYB4; MYB4	myb domain protein 4	myb domain protein 4 myb domain protein 4	Potri.004G138000; Potri.005G112000; Potri.T144800; Potri.011G040300; Potri.004G174400; Potri.010G114000; Potri.009G134000; Potri.008G128500; Potri.006G221800
N1.HOG0000170	N1.HOG0000170_696	complete	0.018836	Potra2n4c9673	Bpev01.c0549.g0004.m0001	FUN_007673-T1	PA_chr01_G003821	PS_chr04_G016676	PS_chr01_G001824	GO:0003700; GO:0005634; GO:0005667; GO:0006355; GO:0030154; GO:0043565; GO:0044212; GO:0045449	DNA; nucleus; transcription factor complex; regulation of transcription, DNA; cell differentiation; sequence; transcription regulatory region DNA binding	AT4G38620	ATMYB4; MYB4	myb domain protein 4	myb domain protein 4 myb domain protein 4	Potri.004G138000; Potri.005G112000; Potri.T144800; Potri.011G040300; Potri.004G174400; Potri.010G114000; Potri.009G134000; Potri.008G128500; Potri.006G221800
N1.HOG0000170	N1.HOG0000170_636	complete	0.0188361	Potra2n4c9673	Bpev01.c0639.g0015.m0001	FUN_007673-T1	PA_chr01_G003821	PS_chr04_G016676	PS_chr01_G001824	GO:0003700; GO:0005634; GO:0005667; GO:0006355; GO:0030154; GO:0043565; GO:0044212; GO:0045449	DNA; nucleus; transcription factor complex; regulation of transcription, DNA; cell differentiation; sequence; transcription regulatory region DNA binding	AT4G38620	ATMYB4; MYB4	myb domain protein 4	myb domain protein 4 myb domain protein 4	Potri.004G138000; Potri.005G112000; Potri.T144800; Potri.011G040300; Potri.004G174400; Potri.010G114000; Potri.009G134000; Potri.008G128500; Potri.006G221800
N1.HOG0000170	N1.HOG0000170_426	complete	0.0189945	Potra2n4c9673	Bpev01.c0639.g0015.m0001	FUN_007778-T1	PA_chr01_G003821	PS_chr04_G016676	PS_chr04_G016676	GO:0003700; GO:0005634; GO:0005667; GO:0006355; GO:0030154; GO:0043565; GO:0044212; GO:0045449	DNA; nucleus; transcription factor complex; regulation of transcription, DNA; cell differentiation; sequence; transcription regulatory region DNA binding	AT4G38620	ATMYB4; MYB4	myb domain protein 4	myb domain protein 4 myb domain protein 4	Potri.004G138000; Potri.005G112000; Potri.T144800; Potri.011G040300; Potri.004G174400; Potri.010G114000; Potri.009G134000; Potri.008G128500; Potri.006G221800
N1.HOG0000170	N1.HOG0000170_654	complete	0.0190023	Potra2n4c9673	Bpev01.c0639.g0015.m0001	FUN_007673-T1	PA_chr01_G003821	PS_chr04_G016676	PS_chr04_G016676	GO:0003700; GO:0005634; GO:0005667; GO:0006355; GO:0030154; GO:0043565; GO:0044212; GO:0045449	DNA; nucleus; transcription factor complex; regulation of transcription, DNA; cell differentiation; sequence; transcription regulatory region DNA binding	AT4G38620	ATMYB4; MYB4	myb domain protein 4	myb domain protein 4 myb domain protein 4	Potri.004G138000; Potri.005G112000; Potri.T144800; Potri.011G040300; Potri.004G174400; Potri.010G114000; Potri.009G134000; Potri.008G128500; Potri.006G221800
N1.HOG0000170	N1.HOG0000170_241	complete	0.0199792	Potra2n9c18946	Bpev01.c0549.g0004.m0001	FUN_030252-T1	PA_chr04_G002634	PS_chr01_G001824	PS_chr01_G001822	GO:0003700; GO:0005634; GO:0005667; GO:0006355; GO:0030154; GO:0043565; GO:0044212; GO:0045449	DNA; nucleus; transcription factor complex; regulation of transcription, DNA; cell differentiation; sequence; transcription regulatory region DNA binding	AT4G38620	ATMYB4; MYB4	myb domain protein 4	myb domain protein 4 myb domain protein 4	Potri.004G138000; Potri.005G112000; Potri.T144800; Potri.011G040300; Potri.004G174400; Potri.010G114000; Potri.009G134000; Potri.008G128500; Potri.006G221800
N1.HOG0000170	N1.HOG0000170_225	complete	0.0199792	Potra2n9c18946	Bpev01.c0639.g0015.m0001	FUN_030252-T1	PA_chr04_G002634	PS_chr01_G001824	PS_chr01_G001822	GO:0003700; GO:0005634; GO:0005667; GO:0006355; GO:0030154; GO:0043565; GO:0044212; GO:0045449	DNA; nucleus; transcription factor complex; regulation of transcription, DNA; cell differentiation; sequence; transcription regulatory region DNA binding	AT4G38620	ATMYB4; MYB4	myb domain protein 4	myb domain protein 4 myb domain protein 4	Potri.004G138000; Potri.005G112000; Potri.T144800; Potri.011G040300; Potri.004G174400; Potri.010G114000; Potri.009G134000; Potri.008G128500; Potri.006G221800
N1.HOG0000170	N1.HOG0000170_383	complete	0.0199793	Potra2n9c18946	Bpev01.c0549.g0004.m0001	FUN_007778-T1	PA_chr04_G002634	PS_chr01_G001824	PS_chr01_G001822	GO:0003700; GO:0005634; GO:0005667; GO:0006355; GO:0030154; GO:0043565; GO:0044212; GO:0045449	DNA; nucleus; transcription factor complex; regulation of transcription, DNA; cell differentiation; sequence; transcription regulatory region DNA binding	AT4G38620	ATMYB4; MYB4	myb domain protein 4	myb domain protein 4 myb domain protein 4	Potri.004G138000; Potri.005G112000; Potri.T144800; Potri.011G040300; Potri.004G174400; Potri.010G114000; Potri.009G134000; Potri.008G128500; Potri.006G221800
N1.HOG0000170	N1.HOG0000170_347	complete	0.0199793	Potra2n9c18946	Bpev01.c0639.g0015.m0001	FUN_007778-T1	PA_chr04_G002634	PS_chr01_G001824	PS_chr01_G001822	GO:0003700; GO:0005634; GO:0005667; GO:0006355; GO:0030154; GO:0043565; GO:0044212; GO:0045449	DNA; nucleus; transcription factor complex; regulation of transcription, DNA; cell differentiation; sequence; transcription regulatory region DNA binding	AT4G38620	ATMYB4; MYB4	myb domain protein 4	myb domain protein 4 myb domain protein 4	Potri.004G138000; Potri.005G112000; Potri.T144800; Potri.011G040300; Potri.004G174400; Potri.010G114000; Potri.009G134000; Potri.008G128500; Potri.006G221800
N1.HOG0000170	N1.HOG0000170_569	complete	0.0199797	Potra2n9c18946	Bpev01.c0549.g0004.m0001	FUN_007673-T1	PA_chr04_G002634	PS_chr01_G001824	PS_chr01_G001822	GO:0003700; GO:0005634; GO:0005667; GO:0006355; GO:0030154; GO:0043565; GO:0044212; GO:0045449	DNA; nucleus; transcription factor complex; regulation of transcription, DNA; cell differentiation; sequence; transcription regulatory region DNA binding	AT4G38620	ATMYB4; MYB4	myb domain protein 4	myb domain protein 4 myb domain protein 4	Potri.004G138000; Potri.005G112000; Potri.T144800; Potri.011G040300; Potri.004G174400; Potri.010G114000; Potri.009G134000; Potri.008G128500; Potri.006G221800
N1.HOG0000170	N1.HOG0000170_509	complete	0.0199798	Potra2n9c18946	Bpev01.c0639.g0015.m0001	FUN_007673-T1	PA_chr04_G002634	PS_chr01_G001824	PS_chr01_G001822	GO:0003700; GO:0005634; GO:0005667; GO:0006355; GO:0030154; GO:0043565; GO:0044212; GO:0045449	DNA; nucleus; transcription factor complex; regulation of transcription, DNA; cell differentiation; sequence; transcription regulatory region DNA binding	AT4G38620	ATMYB4; MYB4	myb domain protein 4	myb domain protein 4 myb domain protein 4	Potri.004G138000; Potri.005G112000; Potri.T144800; Potri.011G040300; Potri.004G174400; Potri.010G114000; Potri.009G134000; Potri.008G128500; Potri.006G221800
N1.HOG0000170	N1.HOG0000170_396	complete	0.0214817	Potra2n9c18946	Bpev01.c0549.g0004.m0001	FUN_007778-T1	PA_chr01_G003821	PS_chr04_G016676	PS_chr01_G001824	GO:0003700; GO:0005634; GO:0005667; GO:0006355; GO:0030154; GO:0043565; GO:0044212; GO:0045449	DNA; nucleus; transcription factor complex; regulation of transcription, DNA; cell differentiation; sequence; transcription regulatory region DNA binding	AT4G38620	ATMYB4; MYB4	myb domain protein 4	myb domain protein 4 myb domain protein 4	Potri.004G138000; Potri.005G112000; Potri.T144800; Potri.011G040300; Potri.004G174400; Potri.010G114000; Potri.009G134000; Potri.008G128500; Potri.006G221800
N1.HOG0000170	N1.HOG0000170_336	complete	0.0214817	Potra2n9c18946	Bpev01.c0639.g0015.m0001	FUN_007778-T1	PA_chr01_G003821	PS_chr04_G016676	PS_chr01_G001824	GO:0003700; GO:0005634; GO:0005667; GO:0006355; GO:0030154; GO:0043565; GO:0044212; GO:0045449	DNA; nucleus; transcription factor complex; regulation of transcription, DNA; cell differentiation; sequence; transcription regulatory region DNA binding	AT4G38620	ATMYB4; MYB4	myb domain protein 4	myb domain protein 4 myb domain protein 4	Potri.004G138000; Potri.005G112000; Potri.T144800; Potri.011G040300; Potri.004G174400; Potri.010G114000; Potri.009G134000; Potri.008G128500; Potri.006G221800
N1.HOG0000170	N1.HOG0000170_588	complete	0.0214818	Potra2n9c18946	Bpev01.c0549.g0004.m0001	FUN_007673-T1	PA_chr01_G003821	PS_chr04_G016676	PS_chr01_G001824	GO:0003700; GO:0005634; GO:0005667; GO:0006355; GO:0030154; GO:0043565; GO:0044212; GO:0045449	DNA; nucleus; transcription factor complex; regulation of transcription, DNA; cell differentiation; sequence; transcription regulatory region DNA binding	AT4G38620	ATMYB4; MYB4	myb domain protein 4	myb domain protein 4 myb domain protein 4	Potri.004G138000; Potri.005G112000; Potri.T144800; Potri.011G040300; Potri.004G174400; Potri.010G114000; Potri.009G134000; Potri.008G128500; Potri.006G221800
N1.HOG0000170	N1.HOG0000170_528	complete	0.0214819	Potra2n9c18946	Bpev01.c0639.g0015.m0001	FUN_007673-T1	PA_chr01_G003821	PS_chr04_G016676	PS_chr01_G001824	GO:0003700; GO:0005634; GO:0005667; GO:0006355; GO:0030154; GO:0043565; GO:0044212; GO:0045449	DNA; nucleus; transcription factor complex; regulation of transcription, DNA; cell differentiation; sequence; transcription regulatory region DNA binding	AT4G38620	ATMYB4; MYB4	myb domain protein 4	myb domain protein 4 myb domain protein 4	Potri.004G138000; Potri.005G112000; Potri.T144800; Potri.011G040300; Potri.004G174400; Potri.010G114000; Potri.009G134000; Potri.008G128500; Potri.006G221800
N1.HOG0000170	N1.HOG0000170_342	complete	0.0242845	Potra2n9c18946	Bpev01.c0639.g0015.m0001	FUN_007778-T1	PA_chr01_G003821	PS_chr04_G016676	PS_chr04_G016676	GO:0003700; GO:0005634; GO:0005667; GO:0006355; GO:0030154; GO:0043565; GO:0044212; GO:0045449	DNA; nucleus; transcription factor complex; regulation of transcription, DNA; cell differentiation; sequence; transcription regulatory region DNA binding	AT4G38620	ATMYB4; MYB4	myb domain protein 4	myb domain protein 4 myb domain protein 4	Potri.004G138000; Potri.005G112000; Potri.T144800; Potri.011G040300; Potri.004G174400; Potri.010G114000; Potri.009G134000; Potri.008G128500; Potri.006G221800
N1.HOG0000170	N1.HOG0000170_546	complete	0.0242923	Potra2n9c18946	Bpev01.c0639.g0015.m0001	FUN_007673-T1	PA_chr01_G003821	PS_chr04_G016676	PS_chr04_G016676	GO:0003700; GO:0005634; GO:0005667; GO:0006355; GO:0030154; GO:0043565; GO:0044212; GO:0045449	DNA; nucleus; transcription factor complex; regulation of transcription, DNA; cell differentiation; sequence; transcription regulatory region DNA binding	AT4G38620	ATMYB4; MYB4	myb domain protein 4	myb domain protein 4 myb domain protein 4	Potri.004G138000; Potri.005G112000; Potri.T144800; Potri.011G040300; Potri.004G174400; Potri.010G114000; Potri.009G134000; Potri.008G128500; Potri.006G221800
N1.HOG0000170	N1.HOG0000170_378	complete	0.0251834	Potra2n9c18946	Bpev01.c0549.g0004.m0001	FUN_007778-T1	PA_chr01_G003821	PS_chr04_G016676	PS_chr01_G001822	GO:0003700; GO:0005634; GO:0005667; GO:0006355; GO:0030154; GO:0043565; GO:0044212; GO:0045449	DNA; nucleus; transcription factor complex; regulation of transcription, DNA; cell differentiation; sequence; transcription regulatory region DNA binding	AT4G38620	ATMYB4; MYB4	myb domain protein 4	myb domain protein 4 myb domain protein 4	Potri.004G138000; Potri.005G112000; Potri.T144800; Potri.011G040300; Potri.004G174400; Potri.010G114000; Potri.009G134000; Potri.008G128500; Potri.006G221800
N1.HOG0000170	N1.HOG0000170_330	complete	0.0251835	Potra2n9c18946	Bpev01.c0639.g0015.m0001	FUN_007778-T1	PA_chr01_G003821	PS_chr04_G016676	PS_chr01_G001822	GO:0003700; GO:0005634; GO:0005667; GO:0006355; GO:0030154; GO:0043565; GO:0044212; GO:0045449	DNA; nucleus; transcription factor complex; regulation of transcription, DNA; cell differentiation; sequence; transcription regulatory region DNA binding	AT4G38620	ATMYB4; MYB4	myb domain protein 4	myb domain protein 4 myb domain protein 4	Potri.004G138000; Potri.005G112000; Potri.T144800; Potri.011G040300; Potri.004G174400; Potri.010G114000; Potri.009G134000; Potri.008G128500; Potri.006G221800
N1.HOG0000170	N1.HOG0000170_564	complete	0.0251839	Potra2n9c18946	Bpev01.c0549.g0004.m0001	FUN_007673-T1	PA_chr01_G003821	PS_chr04_G016676	PS_chr01_G001822	GO:0003700; GO:0005634; GO:0005667; GO:0006355; GO:0030154; GO:0043565; GO:0044212; GO:0045449	DNA; nucleus; transcription factor complex; regulation of transcription, DNA; cell differentiation; sequence; transcription regulatory region DNA binding	AT4G38620	ATMYB4; MYB4	myb domain protein 4	myb domain protein 4 myb domain protein 4	Potri.004G138000; Potri.005G112000; Potri.T144800; Potri.011G040300; Potri.004G174400; Potri.010G114000; Potri.009G134000; Potri.008G128500; Potri.006G221800
N1.HOG0000170	N1.HOG0000170_504	complete	0.025184	Potra2n9c18946	Bpev01.c0639.g0015.m0001	FUN_007673-T1	PA_chr01_G003821	PS_chr04_G016676	PS_chr01_G001822	GO:0003700; GO:0005634; GO:0005667; GO:0006355; GO:0030154; GO:0043565; GO:0044212; GO:0045449	DNA; nucleus; transcription factor complex; regulation of transcription, DNA; cell differentiation; sequence; transcription regulatory region DNA binding	AT4G38620	ATMYB4; MYB4	myb domain protein 4	myb domain protein 4 myb domain protein 4	Potri.004G138000; Potri.005G112000; Potri.T144800; Potri.011G040300; Potri.004G174400; Potri.010G114000; Potri.009G134000; Potri.008G128500; Potri.006G221800
N1.HOG0000187	N1.HOG0000187_17	complete	9.46667e-18	Potra2n10c22314	Bpev01.c0126.g0042.m0001	FUN_025837-T1	PA_chr08_G001160	PS_chr08_G032546	PS_chr08_G032546	GO:0003700; GO:0005634; GO:0005667; GO:0006355; GO:0010119; GO:0030154; GO:0043565; GO:0044212; GO:0045449	DNA; nucleus; transcription factor complex; regulation of transcription, DNA; regulation of stomatal movement; cell differentiation; sequence; transcription regulatory region DNA binding	AT1G09540	ATMYB61; MYB61	ARABIDOPSIS THALIANA MYB DOMAIN PROTEIN 61; myb domain protein 61	myb domain protein 61 myb domain protein 61	Potri.005G001600; Potri.002G185900; Potri.004G086300; Potri.015G082700; Potri.010G004300; Potri.014G111200; Potri.013G001000
N1.HOG0000187	N1.HOG0000187_21	complete	9.46667e-18	Potra2n10c22314	Bpev01.c0126.g0042.m0001	FUN_025837-T1	PA_chr08_cUL0031_G000431	PS_chr08_G032546	PS_chr08_G032546	GO:0003700; GO:0005634; GO:0005667; GO:0006355; GO:0010119; GO:0030154; GO:0043565; GO:0044212; GO:0045449	DNA; nucleus; transcription factor complex; regulation of transcription, DNA; regulation of stomatal movement; cell differentiation; sequence; transcription regulatory region DNA binding	AT1G09540	ATMYB61; MYB61	ARABIDOPSIS THALIANA MYB DOMAIN PROTEIN 61; myb domain protein 61	myb domain protein 61 myb domain protein 61	Potri.005G001600; Potri.002G185900; Potri.004G086300; Potri.015G082700; Potri.010G004300; Potri.014G111200; Potri.013G001000
N1.HOG0000187	N1.HOG0000187_24	complete	3.01667e-09	Potra2n15c28466	Bpev01.c0126.g0042.m0001	FUN_025837-T1	PA_chr08_cUL0031_G000431	PS_chr08_G032546	PS_chr08_G032546	GO:0003700; GO:0005634; GO:0005667; GO:0006355; GO:0010119; GO:0030154; GO:0043565; GO:0044212; GO:0045449	DNA; nucleus; transcription factor complex; regulation of transcription, DNA; regulation of stomatal movement; cell differentiation; sequence; transcription regulatory region DNA binding	AT1G57560	AtMYB50; MYB50	myb domain protein 50	myb domain protein 50 myb domain protein 50	Potri.015G082700
N1.HOG0000187	N1.HOG0000187_28	complete	3.0167e-09	Potra2n15c28466	Bpev01.c0126.g0042.m0001	FUN_025837-T1	PA_chr08_cUL0031_G000431	PS_chr08_G032546	PS_chr11_G047172	GO:0003700; GO:0005634; GO:0005667; GO:0006355; GO:0010119; GO:0030154; GO:0043565; GO:0044212; GO:0045449	DNA; nucleus; transcription factor complex; regulation of transcription, DNA; regulation of stomatal movement; cell differentiation; sequence; transcription regulatory region DNA binding	AT1G57560	AtMYB50; MYB50	myb domain protein 50	myb domain protein 50 myb domain protein 50	Potri.015G082700
N1.HOG0000187	N1.HOG0000187_27	complete	3.43333e-09	Potra2n10c22314	Bpev01.c0126.g0042.m0001	FUN_025837-T1	PA_chr08_cUL0031_G000431	PS_chr08_G032546	PS_chr11_G047172	GO:0003700; GO:0005634; GO:0005667; GO:0006355; GO:0010119; GO:0030154; GO:0043565; GO:0044212; GO:0045449	DNA; nucleus; transcription factor complex; regulation of transcription, DNA; regulation of stomatal movement; cell differentiation; sequence; transcription regulatory region DNA binding	AT1G09540	ATMYB61; MYB61	ARABIDOPSIS THALIANA MYB DOMAIN PROTEIN 61; myb domain protein 61	myb domain protein 61 myb domain protein 61	Potri.005G001600; Potri.002G185900; Potri.004G086300; Potri.015G082700; Potri.010G004300; Potri.014G111200; Potri.013G001000
N1.HOG0000187	N1.HOG0000187_31	complete	3.43333e-09	Potra2n10c22314	Bpev01.c0126.g0042.m0001	FUN_025837-T1	PA_chr08_G001160	PS_chr08_G032546	PS_chr11_G047172	GO:0003700; GO:0005634; GO:0005667; GO:0006355; GO:0010119; GO:0030154; GO:0043565; GO:0044212; GO:0045449	DNA; nucleus; transcription factor complex; regulation of transcription, DNA; regulation of stomatal movement; cell differentiation; sequence; transcription regulatory region DNA binding	AT1G09540	ATMYB61; MYB61	ARABIDOPSIS THALIANA MYB DOMAIN PROTEIN 61; myb domain protein 61	myb domain protein 61 myb domain protein 61	Potri.005G001600; Potri.002G185900; Potri.004G086300; Potri.015G082700; Potri.010G004300; Potri.014G111200; Potri.013G001000
N1.HOG0000187	N1.HOG0000187_20	complete	2.65e-08	Potra2n15c28466	Bpev01.c0126.g0042.m0001	FUN_025837-T1	PA_chr08_G001160	PS_chr08_G032546	PS_chr08_G032546	GO:0003700; GO:0005634; GO:0005667; GO:0006355; GO:0010119; GO:0030154; GO:0043565; GO:0044212; GO:0045449	DNA; nucleus; transcription factor complex; regulation of transcription, DNA; regulation of stomatal movement; cell differentiation; sequence; transcription regulatory region DNA binding	AT1G57560	AtMYB50; MYB50	myb domain protein 50	myb domain protein 50 myb domain protein 50	Potri.015G082700
N1.HOG0000187	N1.HOG0000187_32	complete	2.65e-08	Potra2n15c28466	Bpev01.c0126.g0042.m0001	FUN_025837-T1	PA_chr08_G001160	PS_chr08_G032546	PS_chr11_G047172	GO:0003700; GO:0005634; GO:0005667; GO:0006355; GO:0010119; GO:0030154; GO:0043565; GO:0044212; GO:0045449	DNA; nucleus; transcription factor complex; regulation of transcription, DNA; regulation of stomatal movement; cell differentiation; sequence; transcription regulatory region DNA binding	AT1G57560	AtMYB50; MYB50	myb domain protein 50	myb domain protein 50 myb domain protein 50	Potri.015G082700
N1.HOG0000187	N1.HOG0000187_23	complete	2.78333e-06	Potra2n443s35699	Bpev01.c0126.g0042.m0001	FUN_025837-T1	PA_chr08_cUL0031_G000431	PS_chr08_G032546	PS_chr08_G032546	GO:0003700; GO:0005634; GO:0005667; GO:0006355; GO:0010119; GO:0030154; GO:0043565; GO:0044212; GO:0045449	DNA; nucleus; transcription factor complex; regulation of transcription, DNA; regulation of stomatal movement; cell differentiation; sequence; transcription regulatory region DNA binding	AT5G26660	ATMYB86; MYB86	myb domain protein 86	myb domain protein 86 myb domain protein 86	Potri.005G001600; Potri.002G185900; Potri.012G084100; Potri.014G111200; Potri.006G221200; Potri.013G001000
N1.HOG0000187	N1.HOG0000187_29	complete	2.802e-06	Potra2n443s35699	Bpev01.c0126.g0042.m0001	FUN_025837-T1	PA_chr08_cUL0031_G000431	PS_chr08_G032546	PS_chr11_G047172	GO:0003700; GO:0005634; GO:0005667; GO:0006355; GO:0010119; GO:0030154; GO:0043565; GO:0044212; GO:0045449	DNA; nucleus; transcription factor complex; regulation of transcription, DNA; regulation of stomatal movement; cell differentiation; sequence; transcription regulatory region DNA binding	AT5G26660	ATMYB86; MYB86	myb domain protein 86	myb domain protein 86 myb domain protein 86	Potri.005G001600; Potri.002G185900; Potri.012G084100; Potri.014G111200; Potri.006G221200; Potri.013G001000
N1.HOG0000187	N1.HOG0000187_34	complete	0.000102017	Potra2n2c4723	Bpev01.c0126.g0042.m0001	FUN_025837-T1	PA_chr08_G001160	PS_chr08_G032546	PS_chr11_G047172	GO:0003700; GO:0005634; GO:0005667; GO:0006355; GO:0010119; GO:0030154; GO:0043565; GO:0044212; GO:0045449	DNA; nucleus; transcription factor complex; regulation of transcription, DNA; regulation of stomatal movement; cell differentiation; sequence; transcription regulatory region DNA binding	AT1G09540	ATMYB61; MYB61	ARABIDOPSIS THALIANA MYB DOMAIN PROTEIN 61; myb domain protein 61	myb domain protein 61 myb domain protein 61	Potri.005G001600; Potri.002G185900; Potri.004G086300; Potri.015G082700; Potri.010G004300; Potri.014G111200; Potri.013G001000
N1.HOG0000187	N1.HOG0000187_19	complete	0.000573333	Potra2n443s35699	Bpev01.c0126.g0042.m0001	FUN_025837-T1	PA_chr08_G001160	PS_chr08_G032546	PS_chr08_G032546	GO:0003700; GO:0005634; GO:0005667; GO:0006355; GO:0010119; GO:0030154; GO:0043565; GO:0044212; GO:0045449	DNA; nucleus; transcription factor complex; regulation of transcription, DNA; regulation of stomatal movement; cell differentiation; sequence; transcription regulatory region DNA binding	AT5G26660	ATMYB86; MYB86	myb domain protein 86	myb domain protein 86 myb domain protein 86	Potri.005G001600; Potri.002G185900; Potri.012G084100; Potri.014G111200; Potri.006G221200; Potri.013G001000
N1.HOG0000187	N1.HOG0000187_33	complete	0.000573352	Potra2n443s35699	Bpev01.c0126.g0042.m0001	FUN_025837-T1	PA_chr08_G001160	PS_chr08_G032546	PS_chr11_G047172	GO:0003700; GO:0005634; GO:0005667; GO:0006355; GO:0010119; GO:0030154; GO:0043565; GO:0044212; GO:0045449	DNA; nucleus; transcription factor complex; regulation of transcription, DNA; regulation of stomatal movement; cell differentiation; sequence; transcription regulatory region DNA binding	AT5G26660	ATMYB86; MYB86	myb domain protein 86	myb domain protein 86 myb domain protein 86	Potri.005G001600; Potri.002G185900; Potri.012G084100; Potri.014G111200; Potri.006G221200; Potri.013G001000
N1.HOG0000187	N1.HOG0000187_18	complete	0.00196783	Potra2n2c4723	Bpev01.c0126.g0042.m0001	FUN_025837-T1	PA_chr08_G001160	PS_chr08_G032546	PS_chr08_G032546	GO:0003700; GO:0005634; GO:0005667; GO:0006355; GO:0010119; GO:0030154; GO:0043565; GO:0044212; GO:0045449	DNA; nucleus; transcription factor complex; regulation of transcription, DNA; regulation of stomatal movement; cell differentiation; sequence; transcription regulatory region DNA binding	AT1G09540	ATMYB61; MYB61	ARABIDOPSIS THALIANA MYB DOMAIN PROTEIN 61; myb domain protein 61	myb domain protein 61 myb domain protein 61	Potri.005G001600; Potri.002G185900; Potri.004G086300; Potri.015G082700; Potri.010G004300; Potri.014G111200; Potri.013G001000
N1.HOG0000187	N1.HOG0000187_30	complete	0.00255085	Potra2n2c4723	Bpev01.c0126.g0042.m0001	FUN_025837-T1	PA_chr08_cUL0031_G000431	PS_chr08_G032546	PS_chr11_G047172	GO:0003700; GO:0005634; GO:0005667; GO:0006355; GO:0010119; GO:0030154; GO:0043565; GO:0044212; GO:0045449	DNA; nucleus; transcription factor complex; regulation of transcription, DNA; regulation of stomatal movement; cell differentiation; sequence; transcription regulatory region DNA binding	AT1G09540	ATMYB61; MYB61	ARABIDOPSIS THALIANA MYB DOMAIN PROTEIN 61; myb domain protein 61	myb domain protein 61 myb domain protein 61	Potri.005G001600; Potri.002G185900; Potri.004G086300; Potri.015G082700; Potri.010G004300; Potri.014G111200; Potri.013G001000
N1.HOG0000187	N1.HOG0000187_22	complete	0.00441667	Potra2n2c4723	Bpev01.c0126.g0042.m0001	FUN_025837-T1	PA_chr08_cUL0031_G000431	PS_chr08_G032546	PS_chr08_G032546	GO:0003700; GO:0005634; GO:0005667; GO:0006355; GO:0010119; GO:0030154; GO:0043565; GO:0044212; GO:0045449	DNA; nucleus; transcription factor complex; regulation of transcription, DNA; regulation of stomatal movement; cell differentiation; sequence; transcription regulatory region DNA binding	AT1G09540	ATMYB61; MYB61	ARABIDOPSIS THALIANA MYB DOMAIN PROTEIN 61; myb domain protein 61	myb domain protein 61 myb domain protein 61	Potri.005G001600; Potri.002G185900; Potri.004G086300; Potri.015G082700; Potri.010G004300; Potri.014G111200; Potri.013G001000
N1.HOG0000192	N1.HOG0000192_1	complete	2.88336e-14	Potra2n3c7305	Bpev01.c0170.g0023.m0001	FUN_025159-T1	PA_chr01_G003940	PS_chr01_G002804	PS_chr01_G002804	GO:0003700; GO:0005634; GO:0005667; GO:0005840; GO:0006355; GO:0030154; GO:0043565; GO:0044212; GO:0045449	DNA; nucleus; transcription factor complex; ribosome; regulation of transcription, DNA; cell differentiation; sequence; transcription regulatory region DNA binding	AT1G63910	AtMYB103; MYB103	myb domain protein 103	myb domain protein 103 myb domain protein 103	Potri.001G099800; Potri.003G132000
N1.HOG0000192	N1.HOG0000192_2	complete	2.58336e-09	Potra2n1c829	Bpev01.c0170.g0023.m0001	FUN_025159-T1	PA_chr01_G003940	PS_chr01_G002804	PS_chr01_G002804	GO:0003700; GO:0005634; GO:0005667; GO:0005840; GO:0006355; GO:0030154; GO:0043565; GO:0044212; GO:0045449	DNA; nucleus; transcription factor complex; ribosome; regulation of transcription, DNA; cell differentiation; sequence; transcription regulatory region DNA binding	AT1G63910	AtMYB103; MYB103	myb domain protein 103	myb domain protein 103 myb domain protein 103	Potri.001G099800; Potri.003G132000
N1.HOG0000195	N1.HOG0000195_1	complete	1.15295e-06	Potra2n1c2305	Bpev01.c0777.g0019.m0001	FUN_008182-T1	PA_chr09_G004772	PS_sUP0017_G053666	PS_sUP0017_G053666	GO:0003700; GO:0005634; GO:0005667; GO:0006355; GO:0030154; GO:0043565; GO:0044212; GO:0045449	DNA; nucleus; transcription factor complex; regulation of transcription, DNA; cell differentiation; sequence; transcription regulatory region DNA binding	AT3G08500	AtMYB83; MYB83	myb domain protein 83	myb domain protein 83 myb domain protein 83	Potri.001G267300; Potri.009G061500
N1.HOG0000195	N1.HOG0000195_9	complete	1.15295e-06	Potra2n1c2305	Bpev01.c0777.g0019.m0001	FUN_008162-T1	PA_chr09_G004772	PS_sUP0017_G053666	PS_sUP0017_G053666	GO:0003700; GO:0005634; GO:0005667; GO:0006355; GO:0030154; GO:0043565; GO:0044212; GO:0045449	DNA; nucleus; transcription factor complex; regulation of transcription, DNA; cell differentiation; sequence; transcription regulatory region DNA binding	AT3G08500	AtMYB83; MYB83	myb domain protein 83	myb domain protein 83 myb domain protein 83	Potri.001G267300; Potri.009G061500
N1.HOG0000195	N1.HOG0000195_11	complete	1.15295e-06	Potra2n1c2305	Bpev01.c0777.g0019.m0001	FUN_034732-T1	PA_chr09_G004772	PS_sUP0017_G053666	PS_sUP0017_G053666	GO:0003700; GO:0005634; GO:0005667; GO:0006355; GO:0030154; GO:0043565; GO:0044212; GO:0045449	DNA; nucleus; transcription factor complex; regulation of transcription, DNA; cell differentiation; sequence; transcription regulatory region DNA binding	AT3G08500	AtMYB83; MYB83	myb domain protein 83	myb domain protein 83 myb domain protein 83	Potri.001G267300; Potri.009G061500
N1.HOG0000195	N1.HOG0000195_2	complete	1.16767e-06	Potra2n9c19651	Bpev01.c0777.g0019.m0001	FUN_008182-T1	PA_chr09_G004772	PS_sUP0017_G053666	PS_sUP0017_G053666	GO:0003700; GO:0005634; GO:0005667; GO:0006355; GO:0030154; GO:0043565; GO:0044212; GO:0045449	DNA; nucleus; transcription factor complex; regulation of transcription, DNA; cell differentiation; sequence; transcription regulatory region DNA binding	AT3G08500	AtMYB83; MYB83	myb domain protein 83	myb domain protein 83 myb domain protein 83	Potri.001G267300; Potri.009G061500
N1.HOG0000195	N1.HOG0000195_13	complete	1.16767e-06	Potra2n9c19651	Bpev01.c0777.g0019.m0001	FUN_008162-T1	PA_chr09_G004772	PS_sUP0017_G053666	PS_sUP0017_G053666	GO:0003700; GO:0005634; GO:0005667; GO:0006355; GO:0030154; GO:0043565; GO:0044212; GO:0045449	DNA; nucleus; transcription factor complex; regulation of transcription, DNA; cell differentiation; sequence; transcription regulatory region DNA binding	AT3G08500	AtMYB83; MYB83	myb domain protein 83	myb domain protein 83 myb domain protein 83	Potri.001G267300; Potri.009G061500
N1.HOG0000195	N1.HOG0000195_15	complete	1.16767e-06	Potra2n9c19651	Bpev01.c0777.g0019.m0001	FUN_034732-T1	PA_chr09_G004772	PS_sUP0017_G053666	PS_sUP0017_G053666	GO:0003700; GO:0005634; GO:0005667; GO:0006355; GO:0030154; GO:0043565; GO:0044212; GO:0045449	DNA; nucleus; transcription factor complex; regulation of transcription, DNA; cell differentiation; sequence; transcription regulatory region DNA binding	AT3G08500	AtMYB83; MYB83	myb domain protein 83	myb domain protein 83 myb domain protein 83	Potri.001G267300; Potri.009G061500
N1.HOG0000195	N1.HOG0000195_5	complete	1.42046e-05	Potra2n1c2305	Bpev01.c0404.g0024.m0001	FUN_008182-T1	PA_chr09_G004772	PS_sUP0017_G053666	PS_sUP0017_G053666	GO:0003700; GO:0005634; GO:0005667; GO:0006355; GO:0030154; GO:0043565; GO:0044212; GO:0045449	DNA; nucleus; transcription factor complex; regulation of transcription, DNA; cell differentiation; sequence; transcription regulatory region DNA binding	AT3G08500	AtMYB83; MYB83	myb domain protein 83	myb domain protein 83 myb domain protein 83	Potri.001G267300; Potri.009G061500
N1.HOG0000195	N1.HOG0000195_10	complete	1.42046e-05	Potra2n1c2305	Bpev01.c0404.g0024.m0001	FUN_008162-T1	PA_chr09_G004772	PS_sUP0017_G053666	PS_sUP0017_G053666	GO:0003700; GO:0005634; GO:0005667; GO:0006355; GO:0030154; GO:0043565; GO:0044212; GO:0045449	DNA; nucleus; transcription factor complex; regulation of transcription, DNA; cell differentiation; sequence; transcription regulatory region DNA binding	AT3G08500	AtMYB83; MYB83	myb domain protein 83	myb domain protein 83 myb domain protein 83	Potri.001G267300; Potri.009G061500
N1.HOG0000195	N1.HOG0000195_12	complete	1.42046e-05	Potra2n1c2305	Bpev01.c0404.g0024.m0001	FUN_034732-T1	PA_chr09_G004772	PS_sUP0017_G053666	PS_sUP0017_G053666	GO:0003700; GO:0005634; GO:0005667; GO:0006355; GO:0030154; GO:0043565; GO:0044212; GO:0045449	DNA; nucleus; transcription factor complex; regulation of transcription, DNA; cell differentiation; sequence; transcription regulatory region DNA binding	AT3G08500	AtMYB83; MYB83	myb domain protein 83	myb domain protein 83 myb domain protein 83	Potri.001G267300; Potri.009G061500
N1.HOG0000195	N1.HOG0000195_6	complete	1.42193e-05	Potra2n9c19651	Bpev01.c0404.g0024.m0001	FUN_008182-T1	PA_chr09_G004772	PS_sUP0017_G053666	PS_sUP0017_G053666	GO:0003700; GO:0005634; GO:0005667; GO:0006355; GO:0030154; GO:0043565; GO:0044212; GO:0045449	DNA; nucleus; transcription factor complex; regulation of transcription, DNA; cell differentiation; sequence; transcription regulatory region DNA binding	AT3G08500	AtMYB83; MYB83	myb domain protein 83	myb domain protein 83 myb domain protein 83	Potri.001G267300; Potri.009G061500
N1.HOG0000195	N1.HOG0000195_14	complete	1.42193e-05	Potra2n9c19651	Bpev01.c0404.g0024.m0001	FUN_008162-T1	PA_chr09_G004772	PS_sUP0017_G053666	PS_sUP0017_G053666	GO:0003700; GO:0005634; GO:0005667; GO:0006355; GO:0030154; GO:0043565; GO:0044212; GO:0045449	DNA; nucleus; transcription factor complex; regulation of transcription, DNA; cell differentiation; sequence; transcription regulatory region DNA binding	AT3G08500	AtMYB83; MYB83	myb domain protein 83	myb domain protein 83 myb domain protein 83	Potri.001G267300; Potri.009G061500
N1.HOG0000195	N1.HOG0000195_16	complete	1.42193e-05	Potra2n9c19651	Bpev01.c0404.g0024.m0001	FUN_034732-T1	PA_chr09_G004772	PS_sUP0017_G053666	PS_sUP0017_G053666	GO:0003700; GO:0005634; GO:0005667; GO:0006355; GO:0030154; GO:0043565; GO:0044212; GO:0045449	DNA; nucleus; transcription factor complex; regulation of transcription, DNA; cell differentiation; sequence; transcription regulatory region DNA binding	AT3G08500	AtMYB83; MYB83	myb domain protein 83	myb domain protein 83 myb domain protein 83	Potri.001G267300; Potri.009G061500
N1.HOG0000195	N1.HOG0000195_3	complete	3.2195e-05	Potra2n9c19455	Bpev01.c0777.g0019.m0001	FUN_008182-T1	PA_chr09_G004772	PS_sUP0017_G053666	PS_sUP0017_G053666	GO:0003700; GO:0005634; GO:0005667; GO:0006355; GO:0030154; GO:0043565; GO:0044212; GO:0045449	DNA; nucleus; transcription factor complex; regulation of transcription, DNA; cell differentiation; sequence; transcription regulatory region DNA binding	AT3G08500	AtMYB83; MYB83	myb domain protein 83	myb domain protein 83 myb domain protein 83	Potri.001G267300; Potri.009G061500
N1.HOG0000195	N1.HOG0000195_17	complete	3.2195e-05	Potra2n9c19455	Bpev01.c0777.g0019.m0001	FUN_008162-T1	PA_chr09_G004772	PS_sUP0017_G053666	PS_sUP0017_G053666	GO:0003700; GO:0005634; GO:0005667; GO:0006355; GO:0030154; GO:0043565; GO:0044212; GO:0045449	DNA; nucleus; transcription factor complex; regulation of transcription, DNA; cell differentiation; sequence; transcription regulatory region DNA binding	AT3G08500	AtMYB83; MYB83	myb domain protein 83	myb domain protein 83 myb domain protein 83	Potri.001G267300; Potri.009G061500
N1.HOG0000195	N1.HOG0000195_19	complete	3.2195e-05	Potra2n9c19455	Bpev01.c0777.g0019.m0001	FUN_034732-T1	PA_chr09_G004772	PS_sUP0017_G053666	PS_sUP0017_G053666	GO:0003700; GO:0005634; GO:0005667; GO:0006355; GO:0030154; GO:0043565; GO:0044212; GO:0045449	DNA; nucleus; transcription factor complex; regulation of transcription, DNA; cell differentiation; sequence; transcription regulatory region DNA binding	AT3G08500	AtMYB83; MYB83	myb domain protein 83	myb domain protein 83 myb domain protein 83	Potri.001G267300; Potri.009G061500
N1.HOG0000195	N1.HOG0000195_7	complete	4.52467e-05	Potra2n9c19455	Bpev01.c0404.g0024.m0001	FUN_008182-T1	PA_chr09_G004772	PS_sUP0017_G053666	PS_sUP0017_G053666	GO:0003700; GO:0005634; GO:0005667; GO:0006355; GO:0030154; GO:0043565; GO:0044212; GO:0045449	DNA; nucleus; transcription factor complex; regulation of transcription, DNA; cell differentiation; sequence; transcription regulatory region DNA binding	AT3G08500	AtMYB83; MYB83	myb domain protein 83	myb domain protein 83 myb domain protein 83	Potri.001G267300; Potri.009G061500
N1.HOG0000195	N1.HOG0000195_18	complete	4.52467e-05	Potra2n9c19455	Bpev01.c0404.g0024.m0001	FUN_008162-T1	PA_chr09_G004772	PS_sUP0017_G053666	PS_sUP0017_G053666	GO:0003700; GO:0005634; GO:0005667; GO:0006355; GO:0030154; GO:0043565; GO:0044212; GO:0045449	DNA; nucleus; transcription factor complex; regulation of transcription, DNA; cell differentiation; sequence; transcription regulatory region DNA binding	AT3G08500	AtMYB83; MYB83	myb domain protein 83	myb domain protein 83 myb domain protein 83	Potri.001G267300; Potri.009G061500
N1.HOG0000195	N1.HOG0000195_20	complete	4.52467e-05	Potra2n9c19455	Bpev01.c0404.g0024.m0001	FUN_034732-T1	PA_chr09_G004772	PS_sUP0017_G053666	PS_sUP0017_G053666	GO:0003700; GO:0005634; GO:0005667; GO:0006355; GO:0030154; GO:0043565; GO:0044212; GO:0045449	DNA; nucleus; transcription factor complex; regulation of transcription, DNA; cell differentiation; sequence; transcription regulatory region DNA binding	AT3G08500	AtMYB83; MYB83	myb domain protein 83	myb domain protein 83 myb domain protein 83	Potri.001G267300; Potri.009G061500
N1.HOG0000195	N1.HOG0000195_4	complete	0.00374115	Potra2n1c2250	Bpev01.c0777.g0019.m0001	FUN_008182-T1	PA_chr09_G004772	PS_sUP0017_G053666	PS_sUP0017_G053666	GO:0003700; GO:0005634; GO:0005667; GO:0006355; GO:0030154; GO:0043565; GO:0044212; GO:0045449	DNA; nucleus; transcription factor complex; regulation of transcription, DNA; cell differentiation; sequence; transcription regulatory region DNA binding	AT5G12870	ATMYB46; MYB46	MYB DOMAIN PROTEIN 46; myb domain protein 46	myb domain protein 46 myb domain protein 46	Potri.001G258700; Potri.009G053900
N1.HOG0000195	N1.HOG0000195_21	complete	0.00374115	Potra2n1c2250	Bpev01.c0777.g0019.m0001	FUN_008162-T1	PA_chr09_G004772	PS_sUP0017_G053666	PS_sUP0017_G053666	GO:0003700; GO:0005634; GO:0005667; GO:0006355; GO:0030154; GO:0043565; GO:0044212; GO:0045449	DNA; nucleus; transcription factor complex; regulation of transcription, DNA; cell differentiation; sequence; transcription regulatory region DNA binding	AT5G12870	ATMYB46; MYB46	MYB DOMAIN PROTEIN 46; myb domain protein 46	myb domain protein 46 myb domain protein 46	Potri.001G258700; Potri.009G053900
N1.HOG0000195	N1.HOG0000195_23	complete	0.00374115	Potra2n1c2250	Bpev01.c0777.g0019.m0001	FUN_034732-T1	PA_chr09_G004772	PS_sUP0017_G053666	PS_sUP0017_G053666	GO:0003700; GO:0005634; GO:0005667; GO:0006355; GO:0030154; GO:0043565; GO:0044212; GO:0045449	DNA; nucleus; transcription factor complex; regulation of transcription, DNA; cell differentiation; sequence; transcription regulatory region DNA binding	AT5G12870	ATMYB46; MYB46	MYB DOMAIN PROTEIN 46; myb domain protein 46	myb domain protein 46 myb domain protein 46	Potri.001G258700; Potri.009G053900
N1.HOG0000195	N1.HOG0000195_8	complete	0.0037542	Potra2n1c2250	Bpev01.c0404.g0024.m0001	FUN_008182-T1	PA_chr09_G004772	PS_sUP0017_G053666	PS_sUP0017_G053666	GO:0003700; GO:0005634; GO:0005667; GO:0006355; GO:0030154; GO:0043565; GO:0044212; GO:0045449	DNA; nucleus; transcription factor complex; regulation of transcription, DNA; cell differentiation; sequence; transcription regulatory region DNA binding	AT5G12870	ATMYB46; MYB46	MYB DOMAIN PROTEIN 46; myb domain protein 46	myb domain protein 46 myb domain protein 46	Potri.001G258700; Potri.009G053900
N1.HOG0000195	N1.HOG0000195_22	complete	0.0037542	Potra2n1c2250	Bpev01.c0404.g0024.m0001	FUN_008162-T1	PA_chr09_G004772	PS_sUP0017_G053666	PS_sUP0017_G053666	GO:0003700; GO:0005634; GO:0005667; GO:0006355; GO:0030154; GO:0043565; GO:0044212; GO:0045449	DNA; nucleus; transcription factor complex; regulation of transcription, DNA; cell differentiation; sequence; transcription regulatory region DNA binding	AT5G12870	ATMYB46; MYB46	MYB DOMAIN PROTEIN 46; myb domain protein 46	myb domain protein 46 myb domain protein 46	Potri.001G258700; Potri.009G053900
N1.HOG0000195	N1.HOG0000195_24	complete	0.0037542	Potra2n1c2250	Bpev01.c0404.g0024.m0001	FUN_034732-T1	PA_chr09_G004772	PS_sUP0017_G053666	PS_sUP0017_G053666	GO:0003700; GO:0005634; GO:0005667; GO:0006355; GO:0030154; GO:0043565; GO:0044212; GO:0045449	DNA; nucleus; transcription factor complex; regulation of transcription, DNA; cell differentiation; sequence; transcription regulatory region DNA binding	AT5G12870	ATMYB46; MYB46	MYB DOMAIN PROTEIN 46; myb domain protein 46	myb domain protein 46 myb domain protein 46	Potri.001G258700; Potri.009G053900
N1.HOG0000445	N1.HOG0000445_141	complete	1.225e-48	Potra2n3c7896	Bpev01.c0031.g0012.m0001	FUN_030248-T1	PA_chr01_G001672	PS_chr01_G001120	PS_chr01_G001120	GO:0004252; GO:0005886; GO:0016485	serine; plasma membrane; protein processing	AT3G14240	NA	NA	Subtilase family protein Subtilase family protein	Potri.018G094400; Potri.003G071800; Potri.001G163600
N1.HOG0000445	N1.HOG0000445_149	complete	6.96667e-42	Potra2n3c7896	Bpev01.c0031.g0012.m0001	FUN_013702-T1	PA_chr01_G001672	PS_chr01_G001120	PS_chr01_G001120	GO:0004252; GO:0005886; GO:0016485	serine; plasma membrane; protein processing	AT3G14240	NA	NA	Subtilase family protein Subtilase family protein	Potri.018G094400; Potri.003G071800; Potri.001G163600
N1.HOG0000445	N1.HOG0000445_157	complete	4.76667e-40	Potra2n9c18951	Bpev01.c0031.g0012.m0001	FUN_030248-T1	PA_chr01_G001672	PS_chr01_G001120	PS_chr01_G001120	GO:0004252; GO:0006508	serine; proteolysis	AT4G34980	SLP2	subtilisin-like serine protease 2	subtilisin-like serine protease 2 subtilisin-like serine protease 2	Potri.009G133400; Potri.004G173900
N1.HOG0000445	N1.HOG0000445_165	complete	4.83633e-40	Potra2n9c18951	Bpev01.c0031.g0012.m0001	FUN_013702-T1	PA_chr01_G001672	PS_chr01_G001120	PS_chr01_G001120	GO:0004252; GO:0006508	serine; proteolysis	AT4G34980	SLP2	subtilisin-like serine protease 2	subtilisin-like serine protease 2 subtilisin-like serine protease 2	Potri.009G133400; Potri.004G173900
N1.HOG0000445	N1.HOG0000445_173	complete	3.3007e-39	Potra2n4c9975	Bpev01.c0031.g0012.m0001	FUN_030248-T1	PA_chr01_G001672	PS_chr01_G001120	PS_chr01_G001120	GO:0004252; GO:0006508	serine; proteolysis	AT4G34980	SLP2	subtilisin-like serine protease 2	subtilisin-like serine protease 2 subtilisin-like serine protease 2	Potri.009G133400; Potri.004G173900
N1.HOG0000445	N1.HOG0000445_181	complete	3.30767e-39	Potra2n4c9975	Bpev01.c0031.g0012.m0001	FUN_013702-T1	PA_chr01_G001672	PS_chr01_G001120	PS_chr01_G001120	GO:0004252; GO:0006508	serine; proteolysis	AT4G34980	SLP2	subtilisin-like serine protease 2	subtilisin-like serine protease 2 subtilisin-like serine protease 2	Potri.009G133400; Potri.004G173900
N1.HOG0000445	N1.HOG0000445_145	complete	2.16667e-35	Potra2n3c7896	Bpev01.c0639.g0023.m0001	FUN_030248-T1	PA_chr01_G001672	PS_chr01_G001120	PS_chr01_G001120	GO:0004252; GO:0005886; GO:0016485	serine; plasma membrane; protein processing	AT3G14240	NA	NA	Subtilase family protein Subtilase family protein	Potri.018G094400; Potri.003G071800; Potri.001G163600
N1.HOG0000445	N1.HOG0000445_153	complete	2.16667e-35	Potra2n3c7896	Bpev01.c0639.g0023.m0001	FUN_013702-T1	PA_chr01_G001672	PS_chr01_G001120	PS_chr01_G001120	GO:0004252; GO:0005886; GO:0016485	serine; plasma membrane; protein processing	AT3G14240	NA	NA	Subtilase family protein Subtilase family protein	Potri.018G094400; Potri.003G071800; Potri.001G163600
N1.HOG0000445	N1.HOG0000445_161	complete	2.16671e-35	Potra2n9c18951	Bpev01.c0639.g0023.m0001	FUN_030248-T1	PA_chr01_G001672	PS_chr01_G001120	PS_chr01_G001120	GO:0004252; GO:0006508	serine; proteolysis	AT4G34980	SLP2	subtilisin-like serine protease 2	subtilisin-like serine protease 2 subtilisin-like serine protease 2	Potri.009G133400; Potri.004G173900
N1.HOG0000445	N1.HOG0000445_169	complete	2.16672e-35	Potra2n9c18951	Bpev01.c0639.g0023.m0001	FUN_013702-T1	PA_chr01_G001672	PS_chr01_G001120	PS_chr01_G001120	GO:0004252; GO:0006508	serine; proteolysis	AT4G34980	SLP2	subtilisin-like serine protease 2	subtilisin-like serine protease 2 subtilisin-like serine protease 2	Potri.009G133400; Potri.004G173900
N1.HOG0000445	N1.HOG0000445_177	complete	2.167e-35	Potra2n4c9975	Bpev01.c0639.g0023.m0001	FUN_030248-T1	PA_chr01_G001672	PS_chr01_G001120	PS_chr01_G001120	GO:0004252; GO:0006508	serine; proteolysis	AT4G34980	SLP2	subtilisin-like serine protease 2	subtilisin-like serine protease 2 subtilisin-like serine protease 2	Potri.009G133400; Potri.004G173900
N1.HOG0000445	N1.HOG0000445_185	complete	2.167e-35	Potra2n4c9975	Bpev01.c0639.g0023.m0001	FUN_013702-T1	PA_chr01_G001672	PS_chr01_G001120	PS_chr01_G001120	GO:0004252; GO:0006508	serine; proteolysis	AT4G34980	SLP2	subtilisin-like serine protease 2	subtilisin-like serine protease 2 subtilisin-like serine protease 2	Potri.009G133400; Potri.004G173900
N1.HOG0000445	N1.HOG0000445_189	complete	3.20127e-30	Potra2n1c1437	Bpev01.c0031.g0012.m0001	FUN_030248-T1	PA_chr01_G001672	PS_chr01_G001120	PS_chr01_G001120	GO:0004252; GO:0005886; GO:0016485	serine; plasma membrane; protein processing	AT3G14240	NA	NA	Subtilase family protein Subtilase family protein	Potri.018G094400; Potri.003G071800; Potri.001G163600
N1.HOG0000445	N1.HOG0000445_197	complete	3.20127e-30	Potra2n1c1437	Bpev01.c0031.g0012.m0001	FUN_013702-T1	PA_chr01_G001672	PS_chr01_G001120	PS_chr01_G001120	GO:0004252; GO:0005886; GO:0016485	serine; plasma membrane; protein processing	AT3G14240	NA	NA	Subtilase family protein Subtilase family protein	Potri.018G094400; Potri.003G071800; Potri.001G163600
N1.HOG0000445	N1.HOG0000445_193	complete	3.20129e-30	Potra2n1c1437	Bpev01.c0639.g0023.m0001	FUN_030248-T1	PA_chr01_G001672	PS_chr01_G001120	PS_chr01_G001120	GO:0004252; GO:0005886; GO:0016485	serine; plasma membrane; protein processing	AT3G14240	NA	NA	Subtilase family protein Subtilase family protein	Potri.018G094400; Potri.003G071800; Potri.001G163600
N1.HOG0000445	N1.HOG0000445_201	complete	3.20129e-30	Potra2n1c1437	Bpev01.c0639.g0023.m0001	FUN_013702-T1	PA_chr01_G001672	PS_chr01_G001120	PS_chr01_G001120	GO:0004252; GO:0005886; GO:0016485	serine; plasma membrane; protein processing	AT3G14240	NA	NA	Subtilase family protein Subtilase family protein	Potri.018G094400; Potri.003G071800; Potri.001G163600
N1.HOG0000445	N1.HOG0000445_143	complete	3.5e-11	Potra2n3c7896	Bpev01.c0031.g0012.m0001	FUN_030248-T1	PA_chr01_G001672	PS_chr12_G052377	PS_chr01_G001120	GO:0004252; GO:0005886; GO:0016485	serine; plasma membrane; protein processing	AT3G14240	NA	NA	Subtilase family protein Subtilase family protein	Potri.018G094400; Potri.003G071800; Potri.001G163600
N1.HOG0000445	N1.HOG0000445_151	complete	3.5e-11	Potra2n3c7896	Bpev01.c0031.g0012.m0001	FUN_013702-T1	PA_chr01_G001672	PS_chr12_G052377	PS_chr01_G001120	GO:0004252; GO:0005886; GO:0016485	serine; plasma membrane; protein processing	AT3G14240	NA	NA	Subtilase family protein Subtilase family protein	Potri.018G094400; Potri.003G071800; Potri.001G163600
N1.HOG0000445	N1.HOG0000445_159	complete	3.5e-11	Potra2n9c18951	Bpev01.c0031.g0012.m0001	FUN_030248-T1	PA_chr01_G001672	PS_chr12_G052377	PS_chr01_G001120	GO:0004252; GO:0006508	serine; proteolysis	AT4G34980	SLP2	subtilisin-like serine protease 2	subtilisin-like serine protease 2 subtilisin-like serine protease 2	Potri.009G133400; Potri.004G173900
N1.HOG0000445	N1.HOG0000445_167	complete	3.5e-11	Potra2n9c18951	Bpev01.c0031.g0012.m0001	FUN_013702-T1	PA_chr01_G001672	PS_chr12_G052377	PS_chr01_G001120	GO:0004252; GO:0006508	serine; proteolysis	AT4G34980	SLP2	subtilisin-like serine protease 2	subtilisin-like serine protease 2 subtilisin-like serine protease 2	Potri.009G133400; Potri.004G173900
N1.HOG0000445	N1.HOG0000445_175	complete	3.5e-11	Potra2n4c9975	Bpev01.c0031.g0012.m0001	FUN_030248-T1	PA_chr01_G001672	PS_chr12_G052377	PS_chr01_G001120	GO:0004252; GO:0006508	serine; proteolysis	AT4G34980	SLP2	subtilisin-like serine protease 2	subtilisin-like serine protease 2 subtilisin-like serine protease 2	Potri.009G133400; Potri.004G173900
N1.HOG0000445	N1.HOG0000445_183	complete	3.5e-11	Potra2n4c9975	Bpev01.c0031.g0012.m0001	FUN_013702-T1	PA_chr01_G001672	PS_chr12_G052377	PS_chr01_G001120	GO:0004252; GO:0006508	serine; proteolysis	AT4G34980	SLP2	subtilisin-like serine protease 2	subtilisin-like serine protease 2 subtilisin-like serine protease 2	Potri.009G133400; Potri.004G173900
N1.HOG0000445	N1.HOG0000445_191	complete	3.5e-11	Potra2n1c1437	Bpev01.c0031.g0012.m0001	FUN_030248-T1	PA_chr01_G001672	PS_chr12_G052377	PS_chr01_G001120	GO:0004252; GO:0005886; GO:0016485	serine; plasma membrane; protein processing	AT3G14240	NA	NA	Subtilase family protein Subtilase family protein	Potri.018G094400; Potri.003G071800; Potri.001G163600
N1.HOG0000445	N1.HOG0000445_199	complete	3.5e-11	Potra2n1c1437	Bpev01.c0031.g0012.m0001	FUN_013702-T1	PA_chr01_G001672	PS_chr12_G052377	PS_chr01_G001120	GO:0004252; GO:0005886; GO:0016485	serine; plasma membrane; protein processing	AT3G14240	NA	NA	Subtilase family protein Subtilase family protein	Potri.018G094400; Potri.003G071800; Potri.001G163600
N1.HOG0000445	N1.HOG0000445_109	complete	4.31833e-11	Potra2n3c7896	Bpev01.c0031.g0012.m0001	FUN_030248-T1	PA_chr01_G001672	PS_chr01_G001120	PS_chr12_G052378	GO:0004252; GO:0005886; GO:0016485	serine; plasma membrane; protein processing	AT3G14240	NA	NA	Subtilase family protein Subtilase family protein	Potri.018G094400; Potri.003G071800; Potri.001G163600
N1.HOG0000445	N1.HOG0000445_117	complete	4.31833e-11	Potra2n3c7896	Bpev01.c0639.g0023.m0001	FUN_030248-T1	PA_chr01_G001672	PS_chr01_G001120	PS_chr12_G052378	GO:0004252; GO:0005886; GO:0016485	serine; plasma membrane; protein processing	AT3G14240	NA	NA	Subtilase family protein Subtilase family protein	Potri.018G094400; Potri.003G071800; Potri.001G163600
N1.HOG0000445	N1.HOG0000445_110	complete	5.585e-11	Potra2n9c18951	Bpev01.c0031.g0012.m0001	FUN_030248-T1	PA_chr01_G001672	PS_chr01_G001120	PS_chr12_G052378	GO:0004252; GO:0006508	serine; proteolysis	AT4G34980	SLP2	subtilisin-like serine protease 2	subtilisin-like serine protease 2 subtilisin-like serine protease 2	Potri.009G133400; Potri.004G173900
N1.HOG0000445	N1.HOG0000445_118	complete	5.585e-11	Potra2n9c18951	Bpev01.c0639.g0023.m0001	FUN_030248-T1	PA_chr01_G001672	PS_chr01_G001120	PS_chr12_G052378	GO:0004252; GO:0006508	serine; proteolysis	AT4G34980	SLP2	subtilisin-like serine protease 2	subtilisin-like serine protease 2 subtilisin-like serine protease 2	Potri.009G133400; Potri.004G173900
N1.HOG0000445	N1.HOG0000445_113	complete	7.81833e-11	Potra2n3c7896	Bpev01.c0031.g0012.m0001	FUN_030248-T1	PA_chr01_G001672	PS_chr12_G052377	PS_chr12_G052378	GO:0004252; GO:0005886; GO:0016485	serine; plasma membrane; protein processing	AT3G14240	NA	NA	Subtilase family protein Subtilase family protein	Potri.018G094400; Potri.003G071800; Potri.001G163600
N1.HOG0000445	N1.HOG0000445_114	complete	9.085e-11	Potra2n9c18951	Bpev01.c0031.g0012.m0001	FUN_030248-T1	PA_chr01_G001672	PS_chr12_G052377	PS_chr12_G052378	GO:0004252; GO:0006508	serine; proteolysis	AT4G34980	SLP2	subtilisin-like serine protease 2	subtilisin-like serine protease 2 subtilisin-like serine protease 2	Potri.009G133400; Potri.004G173900
N1.HOG0000445	N1.HOG0000445_46	complete	9.16467e-10	Potra2n9c18951	Bpev01.c0031.g0012.m0001	FUN_030248-T1	PA_chr01_G001672	PS_chr01_G001120	PS_chr12_G052377	GO:0004252; GO:0006508	serine; proteolysis	AT4G34980	SLP2	subtilisin-like serine protease 2	subtilisin-like serine protease 2 subtilisin-like serine protease 2	Potri.009G133400; Potri.004G173900
N1.HOG0000445	N1.HOG0000445_54	complete	9.16467e-10	Potra2n9c18951	Bpev01.c0639.g0023.m0001	FUN_030248-T1	PA_chr01_G001672	PS_chr01_G001120	PS_chr12_G052377	GO:0004252; GO:0006508	serine; proteolysis	AT4G34980	SLP2	subtilisin-like serine protease 2	subtilisin-like serine protease 2 subtilisin-like serine protease 2	Potri.009G133400; Potri.004G173900
N1.HOG0000445	N1.HOG0000445_50	complete	9.51467e-10	Potra2n9c18951	Bpev01.c0031.g0012.m0001	FUN_030248-T1	PA_chr01_G001672	PS_chr12_G052377	PS_chr12_G052377	GO:0004252; GO:0006508	serine; proteolysis	AT4G34980	SLP2	subtilisin-like serine protease 2	subtilisin-like serine protease 2 subtilisin-like serine protease 2	Potri.009G133400; Potri.004G173900
N1.HOG0000445	N1.HOG0000445_48	complete	1.465e-09	Potra2n1c1437	Bpev01.c0031.g0012.m0001	FUN_030248-T1	PA_chr01_G001672	PS_chr01_G001120	PS_chr12_G052377	GO:0004252; GO:0005886; GO:0016485	serine; plasma membrane; protein processing	AT3G14240	NA	NA	Subtilase family protein Subtilase family protein	Potri.018G094400; Potri.003G071800; Potri.001G163600
N1.HOG0000445	N1.HOG0000445_56	complete	1.465e-09	Potra2n1c1437	Bpev01.c0639.g0023.m0001	FUN_030248-T1	PA_chr01_G001672	PS_chr01_G001120	PS_chr12_G052377	GO:0004252; GO:0005886; GO:0016485	serine; plasma membrane; protein processing	AT3G14240	NA	NA	Subtilase family protein Subtilase family protein	Potri.018G094400; Potri.003G071800; Potri.001G163600
N1.HOG0000445	N1.HOG0000445_52	complete	1.5e-09	Potra2n1c1437	Bpev01.c0031.g0012.m0001	FUN_030248-T1	PA_chr01_G001672	PS_chr12_G052377	PS_chr12_G052377	GO:0004252; GO:0005886; GO:0016485	serine; plasma membrane; protein processing	AT3G14240	NA	NA	Subtilase family protein Subtilase family protein	Potri.018G094400; Potri.003G071800; Potri.001G163600
N1.HOG0000445	N1.HOG0000445_112	complete	1.81418e-09	Potra2n1c1437	Bpev01.c0031.g0012.m0001	FUN_030248-T1	PA_chr01_G001672	PS_chr01_G001120	PS_chr12_G052378	GO:0004252; GO:0005886; GO:0016485	serine; plasma membrane; protein processing	AT3G14240	NA	NA	Subtilase family protein Subtilase family protein	Potri.018G094400; Potri.003G071800; Potri.001G163600
N1.HOG0000445	N1.HOG0000445_120	complete	1.81418e-09	Potra2n1c1437	Bpev01.c0639.g0023.m0001	FUN_030248-T1	PA_chr01_G001672	PS_chr01_G001120	PS_chr12_G052378	GO:0004252; GO:0005886; GO:0016485	serine; plasma membrane; protein processing	AT3G14240	NA	NA	Subtilase family protein Subtilase family protein	Potri.018G094400; Potri.003G071800; Potri.001G163600
N1.HOG0000445	N1.HOG0000445_116	complete	1.84918e-09	Potra2n1c1437	Bpev01.c0031.g0012.m0001	FUN_030248-T1	PA_chr01_G001672	PS_chr12_G052377	PS_chr12_G052378	GO:0004252; GO:0005886; GO:0016485	serine; plasma membrane; protein processing	AT3G14240	NA	NA	Subtilase family protein Subtilase family protein	Potri.018G094400; Potri.003G071800; Potri.001G163600
N1.HOG0000445	N1.HOG0000445_45	complete	2.03667e-09	Potra2n3c7896	Bpev01.c0031.g0012.m0001	FUN_030248-T1	PA_chr01_G001672	PS_chr01_G001120	PS_chr12_G052377	GO:0004252; GO:0005886; GO:0016485	serine; plasma membrane; protein processing	AT3G14240	NA	NA	Subtilase family protein Subtilase family protein	Potri.018G094400; Potri.003G071800; Potri.001G163600
N1.HOG0000445	N1.HOG0000445_53	complete	2.03667e-09	Potra2n3c7896	Bpev01.c0639.g0023.m0001	FUN_030248-T1	PA_chr01_G001672	PS_chr01_G001120	PS_chr12_G052377	GO:0004252; GO:0005886; GO:0016485	serine; plasma membrane; protein processing	AT3G14240	NA	NA	Subtilase family protein Subtilase family protein	Potri.018G094400; Potri.003G071800; Potri.001G163600
N1.HOG0000445	N1.HOG0000445_49	complete	2.07167e-09	Potra2n3c7896	Bpev01.c0031.g0012.m0001	FUN_030248-T1	PA_chr01_G001672	PS_chr12_G052377	PS_chr12_G052377	GO:0004252; GO:0005886; GO:0016485	serine; plasma membrane; protein processing	AT3G14240	NA	NA	Subtilase family protein Subtilase family protein	Potri.018G094400; Potri.003G071800; Potri.001G163600
N1.HOG0000445	N1.HOG0000445_147	complete	3.56667e-09	Potra2n3c7896	Bpev01.c0639.g0023.m0001	FUN_030248-T1	PA_chr01_G001672	PS_chr12_G052377	PS_chr01_G001120	GO:0004252; GO:0005886; GO:0016485	serine; plasma membrane; protein processing	AT3G14240	NA	NA	Subtilase family protein Subtilase family protein	Potri.018G094400; Potri.003G071800; Potri.001G163600
N1.HOG0000445	N1.HOG0000445_155	complete	3.56667e-09	Potra2n3c7896	Bpev01.c0639.g0023.m0001	FUN_013702-T1	PA_chr01_G001672	PS_chr12_G052377	PS_chr01_G001120	GO:0004252; GO:0005886; GO:0016485	serine; plasma membrane; protein processing	AT3G14240	NA	NA	Subtilase family protein Subtilase family protein	Potri.018G094400; Potri.003G071800; Potri.001G163600
N1.HOG0000445	N1.HOG0000445_163	complete	3.56667e-09	Potra2n9c18951	Bpev01.c0639.g0023.m0001	FUN_030248-T1	PA_chr01_G001672	PS_chr12_G052377	PS_chr01_G001120	GO:0004252; GO:0006508	serine; proteolysis	AT4G34980	SLP2	subtilisin-like serine protease 2	subtilisin-like serine protease 2 subtilisin-like serine protease 2	Potri.009G133400; Potri.004G173900
N1.HOG0000445	N1.HOG0000445_171	complete	3.56667e-09	Potra2n9c18951	Bpev01.c0639.g0023.m0001	FUN_013702-T1	PA_chr01_G001672	PS_chr12_G052377	PS_chr01_G001120	GO:0004252; GO:0006508	serine; proteolysis	AT4G34980	SLP2	subtilisin-like serine protease 2	subtilisin-like serine protease 2 subtilisin-like serine protease 2	Potri.009G133400; Potri.004G173900
N1.HOG0000445	N1.HOG0000445_179	complete	3.56667e-09	Potra2n4c9975	Bpev01.c0639.g0023.m0001	FUN_030248-T1	PA_chr01_G001672	PS_chr12_G052377	PS_chr01_G001120	GO:0004252; GO:0006508	serine; proteolysis	AT4G34980	SLP2	subtilisin-like serine protease 2	subtilisin-like serine protease 2 subtilisin-like serine protease 2	Potri.009G133400; Potri.004G173900
N1.HOG0000445	N1.HOG0000445_187	complete	3.56667e-09	Potra2n4c9975	Bpev01.c0639.g0023.m0001	FUN_013702-T1	PA_chr01_G001672	PS_chr12_G052377	PS_chr01_G001120	GO:0004252; GO:0006508	serine; proteolysis	AT4G34980	SLP2	subtilisin-like serine protease 2	subtilisin-like serine protease 2 subtilisin-like serine protease 2	Potri.009G133400; Potri.004G173900
N1.HOG0000445	N1.HOG0000445_195	complete	3.56667e-09	Potra2n1c1437	Bpev01.c0639.g0023.m0001	FUN_030248-T1	PA_chr01_G001672	PS_chr12_G052377	PS_chr01_G001120	GO:0004252; GO:0005886; GO:0016485	serine; plasma membrane; protein processing	AT3G14240	NA	NA	Subtilase family protein Subtilase family protein	Potri.018G094400; Potri.003G071800; Potri.001G163600
N1.HOG0000445	N1.HOG0000445_203	complete	3.56667e-09	Potra2n1c1437	Bpev01.c0639.g0023.m0001	FUN_013702-T1	PA_chr01_G001672	PS_chr12_G052377	PS_chr01_G001120	GO:0004252; GO:0005886; GO:0016485	serine; plasma membrane; protein processing	AT3G14240	NA	NA	Subtilase family protein Subtilase family protein	Potri.018G094400; Potri.003G071800; Potri.001G163600
N1.HOG0000445	N1.HOG0000445_121	complete	3.60985e-09	Potra2n3c7896	Bpev01.c0639.g0023.m0001	FUN_030248-T1	PA_chr01_G001672	PS_chr12_G052377	PS_chr12_G052378	GO:0004252; GO:0005886; GO:0016485	serine; plasma membrane; protein processing	AT3G14240	NA	NA	Subtilase family protein Subtilase family protein	Potri.018G094400; Potri.003G071800; Potri.001G163600
N1.HOG0000445	N1.HOG0000445_122	complete	3.62252e-09	Potra2n9c18951	Bpev01.c0639.g0023.m0001	FUN_030248-T1	PA_chr01_G001672	PS_chr12_G052377	PS_chr12_G052378	GO:0004252; GO:0006508	serine; proteolysis	AT4G34980	SLP2	subtilisin-like serine protease 2	subtilisin-like serine protease 2 subtilisin-like serine protease 2	Potri.009G133400; Potri.004G173900
N1.HOG0000445	N1.HOG0000445_58	complete	4.48313e-09	Potra2n9c18951	Bpev01.c0639.g0023.m0001	FUN_030248-T1	PA_chr01_G001672	PS_chr12_G052377	PS_chr12_G052377	GO:0004252; GO:0006508	serine; proteolysis	AT4G34980	SLP2	subtilisin-like serine protease 2	subtilisin-like serine protease 2 subtilisin-like serine protease 2	Potri.009G133400; Potri.004G173900
N1.HOG0000445	N1.HOG0000445_60	complete	5.03167e-09	Potra2n1c1437	Bpev01.c0639.g0023.m0001	FUN_030248-T1	PA_chr01_G001672	PS_chr12_G052377	PS_chr12_G052377	GO:0004252; GO:0005886; GO:0016485	serine; plasma membrane; protein processing	AT3G14240	NA	NA	Subtilase family protein Subtilase family protein	Potri.018G094400; Potri.003G071800; Potri.001G163600
N1.HOG0000445	N1.HOG0000445_124	complete	5.38085e-09	Potra2n1c1437	Bpev01.c0639.g0023.m0001	FUN_030248-T1	PA_chr01_G001672	PS_chr12_G052377	PS_chr12_G052378	GO:0004252; GO:0005886; GO:0016485	serine; plasma membrane; protein processing	AT3G14240	NA	NA	Subtilase family protein Subtilase family protein	Potri.018G094400; Potri.003G071800; Potri.001G163600
N1.HOG0000445	N1.HOG0000445_57	complete	5.60333e-09	Potra2n3c7896	Bpev01.c0639.g0023.m0001	FUN_030248-T1	PA_chr01_G001672	PS_chr12_G052377	PS_chr12_G052377	GO:0004252; GO:0005886; GO:0016485	serine; plasma membrane; protein processing	AT3G14240	NA	NA	Subtilase family protein Subtilase family protein	Potri.018G094400; Potri.003G071800; Potri.001G163600
N1.HOG0000445	N1.HOG0000445_47	complete	6.26e-09	Potra2n4c9975	Bpev01.c0031.g0012.m0001	FUN_030248-T1	PA_chr01_G001672	PS_chr01_G001120	PS_chr12_G052377	GO:0004252; GO:0006508	serine; proteolysis	AT4G34980	SLP2	subtilisin-like serine protease 2	subtilisin-like serine protease 2 subtilisin-like serine protease 2	Potri.009G133400; Potri.004G173900
N1.HOG0000445	N1.HOG0000445_55	complete	6.26e-09	Potra2n4c9975	Bpev01.c0639.g0023.m0001	FUN_030248-T1	PA_chr01_G001672	PS_chr01_G001120	PS_chr12_G052377	GO:0004252; GO:0006508	serine; proteolysis	AT4G34980	SLP2	subtilisin-like serine protease 2	subtilisin-like serine protease 2 subtilisin-like serine protease 2	Potri.009G133400; Potri.004G173900
N1.HOG0000445	N1.HOG0000445_51	complete	6.295e-09	Potra2n4c9975	Bpev01.c0031.g0012.m0001	FUN_030248-T1	PA_chr01_G001672	PS_chr12_G052377	PS_chr12_G052377	GO:0004252; GO:0006508	serine; proteolysis	AT4G34980	SLP2	subtilisin-like serine protease 2	subtilisin-like serine protease 2 subtilisin-like serine protease 2	Potri.009G133400; Potri.004G173900
N1.HOG0000445	N1.HOG0000445_111	complete	9.53085e-09	Potra2n4c9975	Bpev01.c0031.g0012.m0001	FUN_030248-T1	PA_chr01_G001672	PS_chr01_G001120	PS_chr12_G052378	GO:0004252; GO:0006508	serine; proteolysis	AT4G34980	SLP2	subtilisin-like serine protease 2	subtilisin-like serine protease 2 subtilisin-like serine protease 2	Potri.009G133400; Potri.004G173900
N1.HOG0000445	N1.HOG0000445_119	complete	9.53085e-09	Potra2n4c9975	Bpev01.c0639.g0023.m0001	FUN_030248-T1	PA_chr01_G001672	PS_chr01_G001120	PS_chr12_G052378	GO:0004252; GO:0006508	serine; proteolysis	AT4G34980	SLP2	subtilisin-like serine protease 2	subtilisin-like serine protease 2 subtilisin-like serine protease 2	Potri.009G133400; Potri.004G173900
N1.HOG0000445	N1.HOG0000445_115	complete	9.56585e-09	Potra2n4c9975	Bpev01.c0031.g0012.m0001	FUN_030248-T1	PA_chr01_G001672	PS_chr12_G052377	PS_chr12_G052378	GO:0004252; GO:0006508	serine; proteolysis	AT4G34980	SLP2	subtilisin-like serine protease 2	subtilisin-like serine protease 2 subtilisin-like serine protease 2	Potri.009G133400; Potri.004G173900
N1.HOG0000445	N1.HOG0000445_59	complete	9.82667e-09	Potra2n4c9975	Bpev01.c0639.g0023.m0001	FUN_030248-T1	PA_chr01_G001672	PS_chr12_G052377	PS_chr12_G052377	GO:0004252; GO:0006508	serine; proteolysis	AT4G34980	SLP2	subtilisin-like serine protease 2	subtilisin-like serine protease 2 subtilisin-like serine protease 2	Potri.009G133400; Potri.004G173900
N1.HOG0000445	N1.HOG0000445_123	complete	1.30975e-08	Potra2n4c9975	Bpev01.c0639.g0023.m0001	FUN_030248-T1	PA_chr01_G001672	PS_chr12_G052377	PS_chr12_G052378	GO:0004252; GO:0006508	serine; proteolysis	AT4G34980	SLP2	subtilisin-like serine protease 2	subtilisin-like serine protease 2 subtilisin-like serine protease 2	Potri.009G133400; Potri.004G173900
N1.HOG0000445	N1.HOG0000445_142	complete	5.68333e-08	Potra2n3c7896	Bpev01.c0031.g0012.m0001	FUN_030248-T1	PA_chr12_G004249	PS_chr01_G001120	PS_chr01_G001120	GO:0004252; GO:0005886; GO:0016485	serine; plasma membrane; protein processing	AT3G14240	NA	NA	Subtilase family protein Subtilase family protein	Potri.018G094400; Potri.003G071800; Potri.001G163600
N1.HOG0000445	N1.HOG0000445_146	complete	5.68333e-08	Potra2n3c7896	Bpev01.c0639.g0023.m0001	FUN_030248-T1	PA_chr12_G004249	PS_chr01_G001120	PS_chr01_G001120	GO:0004252; GO:0005886; GO:0016485	serine; plasma membrane; protein processing	AT3G14240	NA	NA	Subtilase family protein Subtilase family protein	Potri.018G094400; Potri.003G071800; Potri.001G163600
N1.HOG0000445	N1.HOG0000445_150	complete	5.68333e-08	Potra2n3c7896	Bpev01.c0031.g0012.m0001	FUN_013702-T1	PA_chr12_G004249	PS_chr01_G001120	PS_chr01_G001120	GO:0004252; GO:0005886; GO:0016485	serine; plasma membrane; protein processing	AT3G14240	NA	NA	Subtilase family protein Subtilase family protein	Potri.018G094400; Potri.003G071800; Potri.001G163600
N1.HOG0000445	N1.HOG0000445_154	complete	5.68333e-08	Potra2n3c7896	Bpev01.c0639.g0023.m0001	FUN_013702-T1	PA_chr12_G004249	PS_chr01_G001120	PS_chr01_G001120	GO:0004252; GO:0005886; GO:0016485	serine; plasma membrane; protein processing	AT3G14240	NA	NA	Subtilase family protein Subtilase family protein	Potri.018G094400; Potri.003G071800; Potri.001G163600
N1.HOG0000445	N1.HOG0000445_144	complete	5.68683e-08	Potra2n3c7896	Bpev01.c0031.g0012.m0001	FUN_030248-T1	PA_chr12_G004249	PS_chr12_G052377	PS_chr01_G001120	GO:0004252; GO:0005886; GO:0016485	serine; plasma membrane; protein processing	AT3G14240	NA	NA	Subtilase family protein Subtilase family protein	Potri.018G094400; Potri.003G071800; Potri.001G163600
N1.HOG0000445	N1.HOG0000445_152	complete	5.68683e-08	Potra2n3c7896	Bpev01.c0031.g0012.m0001	FUN_013702-T1	PA_chr12_G004249	PS_chr12_G052377	PS_chr01_G001120	GO:0004252; GO:0005886; GO:0016485	serine; plasma membrane; protein processing	AT3G14240	NA	NA	Subtilase family protein Subtilase family protein	Potri.018G094400; Potri.003G071800; Potri.001G163600
N1.HOG0000445	N1.HOG0000445_77	complete	5.68765e-08	Potra2n3c7896	Bpev01.c0031.g0012.m0001	FUN_030248-T1	PA_chr12_G004249	PS_chr01_G001120	PS_chr12_G052378	GO:0004252; GO:0005886; GO:0016485	serine; plasma membrane; protein processing	AT3G14240	NA	NA	Subtilase family protein Subtilase family protein	Potri.018G094400; Potri.003G071800; Potri.001G163600
N1.HOG0000445	N1.HOG0000445_85	complete	5.68765e-08	Potra2n3c7896	Bpev01.c0639.g0023.m0001	FUN_030248-T1	PA_chr12_G004249	PS_chr01_G001120	PS_chr12_G052378	GO:0004252; GO:0005886; GO:0016485	serine; plasma membrane; protein processing	AT3G14240	NA	NA	Subtilase family protein Subtilase family protein	Potri.018G094400; Potri.003G071800; Potri.001G163600
N1.HOG0000445	N1.HOG0000445_81	complete	5.69115e-08	Potra2n3c7896	Bpev01.c0031.g0012.m0001	FUN_030248-T1	PA_chr12_G004249	PS_chr12_G052377	PS_chr12_G052378	GO:0004252; GO:0005886; GO:0016485	serine; plasma membrane; protein processing	AT3G14240	NA	NA	Subtilase family protein Subtilase family protein	Potri.018G094400; Potri.003G071800; Potri.001G163600
N1.HOG0000445	N1.HOG0000445_13	complete	5.887e-08	Potra2n3c7896	Bpev01.c0031.g0012.m0001	FUN_030248-T1	PA_chr12_G004249	PS_chr01_G001120	PS_chr12_G052377	GO:0004252; GO:0005886; GO:0016485	serine; plasma membrane; protein processing	AT3G14240	NA	NA	Subtilase family protein Subtilase family protein	Potri.018G094400; Potri.003G071800; Potri.001G163600
N1.HOG0000445	N1.HOG0000445_21	complete	5.887e-08	Potra2n3c7896	Bpev01.c0639.g0023.m0001	FUN_030248-T1	PA_chr12_G004249	PS_chr01_G001120	PS_chr12_G052377	GO:0004252; GO:0005886; GO:0016485	serine; plasma membrane; protein processing	AT3G14240	NA	NA	Subtilase family protein Subtilase family protein	Potri.018G094400; Potri.003G071800; Potri.001G163600
N1.HOG0000445	N1.HOG0000445_17	complete	5.8905e-08	Potra2n3c7896	Bpev01.c0031.g0012.m0001	FUN_030248-T1	PA_chr12_G004249	PS_chr12_G052377	PS_chr12_G052377	GO:0004252; GO:0005886; GO:0016485	serine; plasma membrane; protein processing	AT3G14240	NA	NA	Subtilase family protein Subtilase family protein	Potri.018G094400; Potri.003G071800; Potri.001G163600
N1.HOG0000445	N1.HOG0000445_148	complete	6.04e-08	Potra2n3c7896	Bpev01.c0639.g0023.m0001	FUN_030248-T1	PA_chr12_G004249	PS_chr12_G052377	PS_chr01_G001120	GO:0004252; GO:0005886; GO:0016485	serine; plasma membrane; protein processing	AT3G14240	NA	NA	Subtilase family protein Subtilase family protein	Potri.018G094400; Potri.003G071800; Potri.001G163600
N1.HOG0000445	N1.HOG0000445_156	complete	6.04e-08	Potra2n3c7896	Bpev01.c0639.g0023.m0001	FUN_013702-T1	PA_chr12_G004249	PS_chr12_G052377	PS_chr01_G001120	GO:0004252; GO:0005886; GO:0016485	serine; plasma membrane; protein processing	AT3G14240	NA	NA	Subtilase family protein Subtilase family protein	Potri.018G094400; Potri.003G071800; Potri.001G163600
N1.HOG0000445	N1.HOG0000445_89	complete	6.04432e-08	Potra2n3c7896	Bpev01.c0639.g0023.m0001	FUN_030248-T1	PA_chr12_G004249	PS_chr12_G052377	PS_chr12_G052378	GO:0004252; GO:0005886; GO:0016485	serine; plasma membrane; protein processing	AT3G14240	NA	NA	Subtilase family protein Subtilase family protein	Potri.018G094400; Potri.003G071800; Potri.001G163600
N1.HOG0000445	N1.HOG0000445_25	complete	6.24367e-08	Potra2n3c7896	Bpev01.c0639.g0023.m0001	FUN_030248-T1	PA_chr12_G004249	PS_chr12_G052377	PS_chr12_G052377	GO:0004252; GO:0005886; GO:0016485	serine; plasma membrane; protein processing	AT3G14240	NA	NA	Subtilase family protein Subtilase family protein	Potri.018G094400; Potri.003G071800; Potri.001G163600
N1.HOG0000445	N1.HOG0000445_158	complete	1.365e-07	Potra2n9c18951	Bpev01.c0031.g0012.m0001	FUN_030248-T1	PA_chr12_G004249	PS_chr01_G001120	PS_chr01_G001120	GO:0004252; GO:0006508	serine; proteolysis	AT4G34980	SLP2	subtilisin-like serine protease 2	subtilisin-like serine protease 2 subtilisin-like serine protease 2	Potri.009G133400; Potri.004G173900
N1.HOG0000445	N1.HOG0000445_162	complete	1.365e-07	Potra2n9c18951	Bpev01.c0639.g0023.m0001	FUN_030248-T1	PA_chr12_G004249	PS_chr01_G001120	PS_chr01_G001120	GO:0004252; GO:0006508	serine; proteolysis	AT4G34980	SLP2	subtilisin-like serine protease 2	subtilisin-like serine protease 2 subtilisin-like serine protease 2	Potri.009G133400; Potri.004G173900
N1.HOG0000445	N1.HOG0000445_166	complete	1.365e-07	Potra2n9c18951	Bpev01.c0031.g0012.m0001	FUN_013702-T1	PA_chr12_G004249	PS_chr01_G001120	PS_chr01_G001120	GO:0004252; GO:0006508	serine; proteolysis	AT4G34980	SLP2	subtilisin-like serine protease 2	subtilisin-like serine protease 2 subtilisin-like serine protease 2	Potri.009G133400; Potri.004G173900
N1.HOG0000445	N1.HOG0000445_170	complete	1.365e-07	Potra2n9c18951	Bpev01.c0639.g0023.m0001	FUN_013702-T1	PA_chr12_G004249	PS_chr01_G001120	PS_chr01_G001120	GO:0004252; GO:0006508	serine; proteolysis	AT4G34980	SLP2	subtilisin-like serine protease 2	subtilisin-like serine protease 2 subtilisin-like serine protease 2	Potri.009G133400; Potri.004G173900
N1.HOG0000445	N1.HOG0000445_160	complete	1.36535e-07	Potra2n9c18951	Bpev01.c0031.g0012.m0001	FUN_030248-T1	PA_chr12_G004249	PS_chr12_G052377	PS_chr01_G001120	GO:0004252; GO:0006508	serine; proteolysis	AT4G34980	SLP2	subtilisin-like serine protease 2	subtilisin-like serine protease 2 subtilisin-like serine protease 2	Potri.009G133400; Potri.004G173900
N1.HOG0000445	N1.HOG0000445_168	complete	1.36535e-07	Potra2n9c18951	Bpev01.c0031.g0012.m0001	FUN_013702-T1	PA_chr12_G004249	PS_chr12_G052377	PS_chr01_G001120	GO:0004252; GO:0006508	serine; proteolysis	AT4G34980	SLP2	subtilisin-like serine protease 2	subtilisin-like serine protease 2 subtilisin-like serine protease 2	Potri.009G133400; Potri.004G173900
N1.HOG0000445	N1.HOG0000445_78	complete	1.36556e-07	Potra2n9c18951	Bpev01.c0031.g0012.m0001	FUN_030248-T1	PA_chr12_G004249	PS_chr01_G001120	PS_chr12_G052378	GO:0004252; GO:0006508	serine; proteolysis	AT4G34980	SLP2	subtilisin-like serine protease 2	subtilisin-like serine protease 2 subtilisin-like serine protease 2	Potri.009G133400; Potri.004G173900
N1.HOG0000445	N1.HOG0000445_86	complete	1.36556e-07	Potra2n9c18951	Bpev01.c0639.g0023.m0001	FUN_030248-T1	PA_chr12_G004249	PS_chr01_G001120	PS_chr12_G052378	GO:0004252; GO:0006508	serine; proteolysis	AT4G34980	SLP2	subtilisin-like serine protease 2	subtilisin-like serine protease 2 subtilisin-like serine protease 2	Potri.009G133400; Potri.004G173900
N1.HOG0000445	N1.HOG0000445_82	complete	1.36591e-07	Potra2n9c18951	Bpev01.c0031.g0012.m0001	FUN_030248-T1	PA_chr12_G004249	PS_chr12_G052377	PS_chr12_G052378	GO:0004252; GO:0006508	serine; proteolysis	AT4G34980	SLP2	subtilisin-like serine protease 2	subtilisin-like serine protease 2 subtilisin-like serine protease 2	Potri.009G133400; Potri.004G173900
N1.HOG0000445	N1.HOG0000445_14	complete	1.37416e-07	Potra2n9c18951	Bpev01.c0031.g0012.m0001	FUN_030248-T1	PA_chr12_G004249	PS_chr01_G001120	PS_chr12_G052377	GO:0004252; GO:0006508	serine; proteolysis	AT4G34980	SLP2	subtilisin-like serine protease 2	subtilisin-like serine protease 2 subtilisin-like serine protease 2	Potri.009G133400; Potri.004G173900
N1.HOG0000445	N1.HOG0000445_22	complete	1.37416e-07	Potra2n9c18951	Bpev01.c0639.g0023.m0001	FUN_030248-T1	PA_chr12_G004249	PS_chr01_G001120	PS_chr12_G052377	GO:0004252; GO:0006508	serine; proteolysis	AT4G34980	SLP2	subtilisin-like serine protease 2	subtilisin-like serine protease 2 subtilisin-like serine protease 2	Potri.009G133400; Potri.004G173900
N1.HOG0000445	N1.HOG0000445_18	complete	1.37451e-07	Potra2n9c18951	Bpev01.c0031.g0012.m0001	FUN_030248-T1	PA_chr12_G004249	PS_chr12_G052377	PS_chr12_G052377	GO:0004252; GO:0006508	serine; proteolysis	AT4G34980	SLP2	subtilisin-like serine protease 2	subtilisin-like serine protease 2 subtilisin-like serine protease 2	Potri.009G133400; Potri.004G173900
N1.HOG0000445	N1.HOG0000445_164	complete	1.40067e-07	Potra2n9c18951	Bpev01.c0639.g0023.m0001	FUN_030248-T1	PA_chr12_G004249	PS_chr12_G052377	PS_chr01_G001120	GO:0004252; GO:0006508	serine; proteolysis	AT4G34980	SLP2	subtilisin-like serine protease 2	subtilisin-like serine protease 2 subtilisin-like serine protease 2	Potri.009G133400; Potri.004G173900
N1.HOG0000445	N1.HOG0000445_172	complete	1.40067e-07	Potra2n9c18951	Bpev01.c0639.g0023.m0001	FUN_013702-T1	PA_chr12_G004249	PS_chr12_G052377	PS_chr01_G001120	GO:0004252; GO:0006508	serine; proteolysis	AT4G34980	SLP2	subtilisin-like serine protease 2	subtilisin-like serine protease 2 subtilisin-like serine protease 2	Potri.009G133400; Potri.004G173900
N1.HOG0000445	N1.HOG0000445_90	complete	1.40123e-07	Potra2n9c18951	Bpev01.c0639.g0023.m0001	FUN_030248-T1	PA_chr12_G004249	PS_chr12_G052377	PS_chr12_G052378	GO:0004252; GO:0006508	serine; proteolysis	AT4G34980	SLP2	subtilisin-like serine protease 2	subtilisin-like serine protease 2 subtilisin-like serine protease 2	Potri.009G133400; Potri.004G173900
N1.HOG0000445	N1.HOG0000445_26	complete	1.40983e-07	Potra2n9c18951	Bpev01.c0639.g0023.m0001	FUN_030248-T1	PA_chr12_G004249	PS_chr12_G052377	PS_chr12_G052377	GO:0004252; GO:0006508	serine; proteolysis	AT4G34980	SLP2	subtilisin-like serine protease 2	subtilisin-like serine protease 2 subtilisin-like serine protease 2	Potri.009G133400; Potri.004G173900
N1.HOG0000445	N1.HOG0000445_174	complete	1.86667e-07	Potra2n4c9975	Bpev01.c0031.g0012.m0001	FUN_030248-T1	PA_chr12_G004249	PS_chr01_G001120	PS_chr01_G001120	GO:0004252; GO:0006508	serine; proteolysis	AT4G34980	SLP2	subtilisin-like serine protease 2	subtilisin-like serine protease 2 subtilisin-like serine protease 2	Potri.009G133400; Potri.004G173900
N1.HOG0000445	N1.HOG0000445_178	complete	1.86667e-07	Potra2n4c9975	Bpev01.c0639.g0023.m0001	FUN_030248-T1	PA_chr12_G004249	PS_chr01_G001120	PS_chr01_G001120	GO:0004252; GO:0006508	serine; proteolysis	AT4G34980	SLP2	subtilisin-like serine protease 2	subtilisin-like serine protease 2 subtilisin-like serine protease 2	Potri.009G133400; Potri.004G173900
N1.HOG0000445	N1.HOG0000445_182	complete	1.86667e-07	Potra2n4c9975	Bpev01.c0031.g0012.m0001	FUN_013702-T1	PA_chr12_G004249	PS_chr01_G001120	PS_chr01_G001120	GO:0004252; GO:0006508	serine; proteolysis	AT4G34980	SLP2	subtilisin-like serine protease 2	subtilisin-like serine protease 2 subtilisin-like serine protease 2	Potri.009G133400; Potri.004G173900
N1.HOG0000445	N1.HOG0000445_186	complete	1.86667e-07	Potra2n4c9975	Bpev01.c0639.g0023.m0001	FUN_013702-T1	PA_chr12_G004249	PS_chr01_G001120	PS_chr01_G001120	GO:0004252; GO:0006508	serine; proteolysis	AT4G34980	SLP2	subtilisin-like serine protease 2	subtilisin-like serine protease 2 subtilisin-like serine protease 2	Potri.009G133400; Potri.004G173900
N1.HOG0000445	N1.HOG0000445_176	complete	1.86702e-07	Potra2n4c9975	Bpev01.c0031.g0012.m0001	FUN_030248-T1	PA_chr12_G004249	PS_chr12_G052377	PS_chr01_G001120	GO:0004252; GO:0006508	serine; proteolysis	AT4G34980	SLP2	subtilisin-like serine protease 2	subtilisin-like serine protease 2 subtilisin-like serine protease 2	Potri.009G133400; Potri.004G173900
N1.HOG0000445	N1.HOG0000445_184	complete	1.86702e-07	Potra2n4c9975	Bpev01.c0031.g0012.m0001	FUN_013702-T1	PA_chr12_G004249	PS_chr12_G052377	PS_chr01_G001120	GO:0004252; GO:0006508	serine; proteolysis	AT4G34980	SLP2	subtilisin-like serine protease 2	subtilisin-like serine protease 2 subtilisin-like serine protease 2	Potri.009G133400; Potri.004G173900
N1.HOG0000445	N1.HOG0000445_180	complete	1.90233e-07	Potra2n4c9975	Bpev01.c0639.g0023.m0001	FUN_030248-T1	PA_chr12_G004249	PS_chr12_G052377	PS_chr01_G001120	GO:0004252; GO:0006508	serine; proteolysis	AT4G34980	SLP2	subtilisin-like serine protease 2	subtilisin-like serine protease 2 subtilisin-like serine protease 2	Potri.009G133400; Potri.004G173900
N1.HOG0000445	N1.HOG0000445_188	complete	1.90233e-07	Potra2n4c9975	Bpev01.c0639.g0023.m0001	FUN_013702-T1	PA_chr12_G004249	PS_chr12_G052377	PS_chr01_G001120	GO:0004252; GO:0006508	serine; proteolysis	AT4G34980	SLP2	subtilisin-like serine protease 2	subtilisin-like serine protease 2 subtilisin-like serine protease 2	Potri.009G133400; Potri.004G173900
N1.HOG0000445	N1.HOG0000445_15	complete	1.92927e-07	Potra2n4c9975	Bpev01.c0031.g0012.m0001	FUN_030248-T1	PA_chr12_G004249	PS_chr01_G001120	PS_chr12_G052377	GO:0004252; GO:0006508	serine; proteolysis	AT4G34980	SLP2	subtilisin-like serine protease 2	subtilisin-like serine protease 2 subtilisin-like serine protease 2	Potri.009G133400; Potri.004G173900
N1.HOG0000445	N1.HOG0000445_23	complete	1.92927e-07	Potra2n4c9975	Bpev01.c0639.g0023.m0001	FUN_030248-T1	PA_chr12_G004249	PS_chr01_G001120	PS_chr12_G052377	GO:0004252; GO:0006508	serine; proteolysis	AT4G34980	SLP2	subtilisin-like serine protease 2	subtilisin-like serine protease 2 subtilisin-like serine protease 2	Potri.009G133400; Potri.004G173900
N1.HOG0000445	N1.HOG0000445_19	complete	1.92962e-07	Potra2n4c9975	Bpev01.c0031.g0012.m0001	FUN_030248-T1	PA_chr12_G004249	PS_chr12_G052377	PS_chr12_G052377	GO:0004252; GO:0006508	serine; proteolysis	AT4G34980	SLP2	subtilisin-like serine protease 2	subtilisin-like serine protease 2 subtilisin-like serine protease 2	Potri.009G133400; Potri.004G173900
N1.HOG0000445	N1.HOG0000445_79	complete	1.96198e-07	Potra2n4c9975	Bpev01.c0031.g0012.m0001	FUN_030248-T1	PA_chr12_G004249	PS_chr01_G001120	PS_chr12_G052378	GO:0004252; GO:0006508	serine; proteolysis	AT4G34980	SLP2	subtilisin-like serine protease 2	subtilisin-like serine protease 2 subtilisin-like serine protease 2	Potri.009G133400; Potri.004G173900
N1.HOG0000445	N1.HOG0000445_87	complete	1.96198e-07	Potra2n4c9975	Bpev01.c0639.g0023.m0001	FUN_030248-T1	PA_chr12_G004249	PS_chr01_G001120	PS_chr12_G052378	GO:0004252; GO:0006508	serine; proteolysis	AT4G34980	SLP2	subtilisin-like serine protease 2	subtilisin-like serine protease 2 subtilisin-like serine protease 2	Potri.009G133400; Potri.004G173900
N1.HOG0000445	N1.HOG0000445_83	complete	1.96233e-07	Potra2n4c9975	Bpev01.c0031.g0012.m0001	FUN_030248-T1	PA_chr12_G004249	PS_chr12_G052377	PS_chr12_G052378	GO:0004252; GO:0006508	serine; proteolysis	AT4G34980	SLP2	subtilisin-like serine protease 2	subtilisin-like serine protease 2 subtilisin-like serine protease 2	Potri.009G133400; Potri.004G173900
N1.HOG0000445	N1.HOG0000445_27	complete	1.96493e-07	Potra2n4c9975	Bpev01.c0639.g0023.m0001	FUN_030248-T1	PA_chr12_G004249	PS_chr12_G052377	PS_chr12_G052377	GO:0004252; GO:0006508	serine; proteolysis	AT4G34980	SLP2	subtilisin-like serine protease 2	subtilisin-like serine protease 2 subtilisin-like serine protease 2	Potri.009G133400; Potri.004G173900
N1.HOG0000445	N1.HOG0000445_91	complete	1.99764e-07	Potra2n4c9975	Bpev01.c0639.g0023.m0001	FUN_030248-T1	PA_chr12_G004249	PS_chr12_G052377	PS_chr12_G052378	GO:0004252; GO:0006508	serine; proteolysis	AT4G34980	SLP2	subtilisin-like serine protease 2	subtilisin-like serine protease 2 subtilisin-like serine protease 2	Potri.009G133400; Potri.004G173900
[truncated: 69,795 more rows]

## Sheet: Conserved genes unique
OrthoGroup	cliqueID	conservedType	MeanCliqueSum	Asp	Birch	Cher	Nor	Scots	Lodge	GO_ID	GO_Term	Arab	Symbol	Name	Description	Poptri
[truncated: 2,145 more rows]

[truncated: 6 more sheets: Differentiated genes, Differentiated genes unique, Angio-specific genes, Angio-specific genes unique, Gymno-specific genes, Gymno-specific genes unique]
