# Supplementary material for: An evo-devo resource for wood: Comparative regulomics across dicot and conifer trees
Source: Research Square preprint supplement (doi:10.21203/rs.3.rs-7656402/v1), 2025-10-30
Supplement: Supplementary file 2 [file 4cc41f52988d3ed987bb3eaf.xlsx]

## Sheet: README.md
Tab S6. The regulatory networks in Populus tremula (Pt) and Picea abies (Pa).
Data description:
pfms	Position Frequency Matrices for plant TFBS motifts from Jaspar and plantTFDB.
network	Predicted TF-module network
cesA	Predicted regulators of SCW cesAs
PPI	Predicted protein-protein interactions using AlphaFold3
TF-DNA	Predicted protein-DNA interactions using AlphaFold3

## Sheet: pfms
MEME version 4
ALPHABET= ACGT
strands: + -
MOTIF MP00017.1 NAC030
letter-probability matrix: alength= 4 w= 12 nsites= 20 E= 0
0.349833 0.138627 0.417830 0.093710
0.155334 0.077556 0.386078 0.381032
0.562755 0.070742 0.219649 0.146853
0.033158 0.706415 0.075090 0.185337
0.904254 0.028032 0.014145 0.053568
0.033563 0.902037 0.049492 0.014909
0.009280 0.022413 0.921284 0.047023
0.029972 0.374100 0.405023 0.190906
0.717099 0.232566 0.012789 0.037546
0.897068 0.041576 0.041785 0.019571
0.067712 0.745324 0.087577 0.099387
0.023919 0.339425 0.051936 0.584721
URL http://planttfdb.gao-lab.org/motif/Ath/AT1G71930.meme
MOTIF MP00015.1 NAC066
letter-probability matrix: alength= 4 w= 13 nsites= 20 E= 0
0.197435 0.333714 0.294460 0.174391
0.262823 0.120785 0.083612 0.532780
0.669648 0.086613 0.130843 0.112895
0.026346 0.629316 0.053789 0.290549
0.868165 0.038938 0.073310 0.019588
0.120297 0.821557 0.032012 0.026134
0.034021 0.040068 0.884735 0.041176
0.031094 0.784528 0.024653 0.159726
0.765821 0.116084 0.030515 0.087580
0.849168 0.022811 0.013638 0.114384
0.154200 0.275089 0.074030 0.496681
0.127339 0.516835 0.247569 0.108258
0.358775 0.133016 0.207602 0.300607
URL http://planttfdb.gao-lab.org/motif/Ath/AT3G61910.meme
MOTIF MP00016.1 NAC012
letter-probability matrix: alength= 4 w= 12 nsites= 20 E= 0
0.042067 0.067224 0.783946 0.106763
0.338008 0.060288 0.509697 0.092007
0.022657 0.005038 0.002126 0.970179
0.160905 0.004774 0.024707 0.809614
0.124729 0.014482 0.850887 0.009902
0.020459 0.971998 0.001990 0.005553
0.001924 0.003528 0.958689 0.035859
0.002833 0.003928 0.004255 0.988984
0.965617 0.006215 0.026041 0.002126
0.848126 0.019527 0.104658 0.027688
0.184365 0.181649 0.100630 0.533356
0.312782 0.311117 0.143517 0.232584
URL http://planttfdb.gao-lab.org/motif/Ath/AT1G32770.meme
MOTIF MA0021.1 Dof3
letter-probability matrix: alength= 4 w= 6 nsites= 21 E= 0
1.000000 0.000000 0.000000 0.000000
1.000000 0.000000 0.000000 0.000000
1.000000 0.000000 0.000000 0.000000
0.000000 0.000000 1.000000 0.000000
0.000000 0.476190 0.142857 0.380952
0.285714 0.285714 0.428571 0.000000
URL http://jaspar.genereg.net/matrix/MA0021.1
MOTIF MA0053.1 MNB1A
letter-probability matrix: alength= 4 w= 5 nsites= 15 E= 0
1.000000 0.000000 0.000000 0.000000
1.000000 0.000000 0.000000 0.000000
1.000000 0.000000 0.000000 0.000000
0.000000 0.000000 1.000000 0.000000
0.200000 0.600000 0.000000 0.200000
URL http://jaspar.genereg.net/matrix/MA0053.1
MOTIF MA0054.1 myb.Ph3
letter-probability matrix: alength= 4 w= 9 nsites= 70 E= 0
0.271429 0.042857 0.028571 0.657143
0.914286 0.014286 0.028571 0.042857
0.900000 0.000000 0.028571 0.071429
0.057143 0.885714 0.042857 0.014286
0.142857 0.385714 0.228571 0.242857
0.142857 0.028571 0.757143 0.071429
0.185714 0.114286 0.000000 0.700000
0.042857 0.242857 0.014286 0.700000
0.400000 0.014286 0.000000 0.585714
URL http://jaspar.genereg.net/matrix/MA0054.1
MOTIF MA0064.1 PBF
letter-probability matrix: alength= 4 w= 5 nsites= 16 E= 0
1.000000 0.000000 0.000000 0.000000
1.000000 0.000000 0.000000 0.000000
1.000000 0.000000 0.000000 0.000000
0.000000 0.000000 1.000000 0.000000
0.062500 0.562500 0.062500 0.312500
URL http://jaspar.genereg.net/matrix/MA0064.1
MOTIF MA0096.1 bZIP910
letter-probability matrix: alength= 4 w= 7 nsites= 35 E= 0
0.428571 0.428571 0.142857 0.000000
0.000000 0.000000 0.000000 1.000000
0.000000 0.000000 1.000000 0.000000
1.000000 0.000000 0.000000 0.000000
0.000000 1.000000 0.000000 0.000000
0.000000 0.000000 1.000000 0.000000
0.000000 0.000000 0.000000 1.000000
URL http://jaspar.genereg.net/matrix/MA0096.1
MOTIF MA0097.1 bZIP911
letter-probability matrix: alength= 4 w= 12 nsites= 33 E= 0
0.030303 0.000000 0.939394 0.030303
0.515152 0.000000 0.484848 0.000000
0.000000 0.000000 0.000000 1.000000
0.000000 0.000000 1.000000 0.000000
1.000000 0.000000 0.000000 0.000000
0.000000 1.000000 0.000000 0.000000
0.000000 0.000000 1.000000 0.000000
0.000000 0.000000 0.000000 1.000000
0.000000 0.030303 0.969697 0.000000
0.030303 0.000000 0.666667 0.303030
0.333333 0.606061 0.030303 0.030303
0.030303 0.969697 0.000000 0.000000
URL http://jaspar.genereg.net/matrix/MA0097.1
MOTIF MA0123.1 abi4
letter-probability matrix: alength= 4 w= 10 nsites= 49 E= 0
0.000000 1.000000 0.000000 0.000000
0.244898 0.000000 0.755102 0.000000
0.000000 0.408163 0.591837 0.000000
0.000000 0.469388 0.020408 0.510204
0.020408 0.061224 0.918367 0.000000
0.000000 0.918367 0.081633 0.000000
0.102041 0.571429 0.122449 0.204082
0.061224 0.510204 0.224490 0.204082
0.061224 0.632653 0.102041 0.204082
0.081633 0.530612 0.142857 0.244898
URL http://jaspar.genereg.net/matrix/MA0123.1
MOTIF MA0128.1 EmBP-1
letter-probability matrix: alength= 4 w= 8 nsites= 13 E= 0
0.692308 0.000000 0.000000 0.307692
0.076923 0.538462 0.307692 0.076923
1.000000 0.000000 0.000000 0.000000
0.000000 0.923077 0.000000 0.076923
0.000000 0.000000 1.000000 0.000000
0.000000 0.000000 0.000000 1.000000
0.000000 0.076923 0.923077 0.000000
0.000000 0.076923 0.923077 0.000000
URL http://jaspar.genereg.net/matrix/MA0128.1
MOTIF MA0129.1 TGA1A
letter-probability matrix: alength= 4 w= 7 nsites= 15 E= 0
0.266667 0.266667 0.000000 0.466667
0.866667 0.000000 0.066667 0.066667
0.000000 0.933333 0.000000 0.066667
0.133333 0.000000 0.866667 0.000000
0.066667 0.000000 0.000000 0.933333
0.000000 1.000000 0.000000 0.000000
0.866667 0.000000 0.066667 0.066667
URL http://jaspar.genereg.net/matrix/MA0129.1
MOTIF MA0559.1 PI
letter-probability matrix: alength= 4 w= 14 nsites= 558 E= 0
0.279570 0.600358 0.086022 0.034050
0.102151 0.706093 0.078853 0.112903
0.639785 0.141577 0.120072 0.098566
0.802867 0.021505 0.148746 0.026882
0.987455 0.001792 0.007168 0.003584
0.892473 0.000000 0.021505 0.086022
0.539427 0.014337 0.437276 0.008961
0.559140 0.025090 0.123656 0.292115
0.413978 0.000000 0.586022 0.000000
0.012545 0.010753 0.976703 0.000000
0.799283 0.096774 0.012545 0.091398
0.887097 0.012545 0.043011 0.057348
0.817204 0.046595 0.107527 0.028674
0.458781 0.103943 0.356631 0.080645
URL http://jaspar.genereg.net/matrix/MA0559.1
MOTIF MA0567.1 ERF1B
letter-probability matrix: alength= 4 w= 8 nsites= 100 E= 0
0.420000 0.540000 0.030000 0.010000
0.009901 0.009901 0.970297 0.009901
0.000000 0.980000 0.010000 0.010000
0.040000 0.960000 0.000000 0.000000
0.020000 0.000000 0.970000 0.010000
0.020000 0.920000 0.020000 0.040000
0.009901 0.970297 0.009901 0.009901
0.585859 0.050505 0.242424 0.121212
URL http://jaspar.genereg.net/matrix/MA0567.1
MOTIF MA0574.1 MYB15
letter-probability matrix: alength= 4 w= 13 nsites= 100 E= 0
0.040000 0.730000 0.090000 0.140000
0.270000 0.180000 0.510000 0.040000
0.640000 0.180000 0.180000 0.000000
0.040000 0.640000 0.180000 0.140000
0.000000 0.000000 1.000000 0.000000
0.000000 0.000000 1.000000 0.000000
0.000000 0.000000 0.000000 1.000000
0.870000 0.040000 0.000000 0.090000
0.000000 0.000000 1.000000 0.000000
0.000000 0.000000 1.000000 0.000000
0.000000 0.000000 0.000000 1.000000
0.180000 0.000000 0.780000 0.040000
0.040000 0.000000 0.870000 0.090000
URL http://jaspar.genereg.net/matrix/MA0574.1
MOTIF MA0590.1 LFY
letter-probability matrix: alength= 4 w= 19 nsites= 384 E= 0
0.083333 0.270833 0.127604 0.518229
0.707447 0.034574 0.045213 0.212766
0.119658 0.160256 0.025641 0.694444
0.035398 0.012389 0.315044 0.637168
0.335106 0.000000 0.654255 0.010638
0.705882 0.133127 0.006192 0.154799
0.026178 0.952880 0.000000 0.020942
0.000000 0.949602 0.000000 0.050398
0.248021 0.005277 0.720317 0.026385
0.083732 0.416268 0.416268 0.083732
0.026385 0.720317 0.005277 0.248021
0.050398 0.000000 0.949602 0.000000
0.020942 0.000000 0.952880 0.026178
0.154799 0.006192 0.133127 0.705882
0.010638 0.654255 0.000000 0.335106
0.637168 0.315044 0.012389 0.035398
0.694444 0.025641 0.160256 0.119658
0.212766 0.045213 0.034574 0.707447
0.518229 0.127604 0.270833 0.083333
URL http://jaspar.genereg.net/matrix/MA0590.1
MOTIF MA0935.1 NAC025
letter-probability matrix: alength= 4 w= 8 nsites= 1001 E= 0
0.000999 0.420579 0.000999 0.577423
0.965000 0.000000 0.035000 0.000000
0.000000 1.000000 0.000000 0.000000
0.000000 0.000000 1.000000 0.000000
0.000000 0.276000 0.069000 0.655000
0.827000 0.173000 0.000000 0.000000
0.930931 0.000000 0.000000 0.069069
0.050050 0.599600 0.050050 0.300300
URL http://jaspar.genereg.net/matrix/MA0935.1
MOTIF MA0936.1 NAC046
letter-probability matrix: alength= 4 w= 8 nsites= 1000 E= 0
0.544000 0.217000 0.080000 0.159000
0.065934 0.629371 0.037962 0.266733
0.813000 0.120000 0.043000 0.024000
0.102000 0.858000 0.024000 0.016000
0.094000 0.049000 0.812000 0.045000
0.143000 0.565000 0.112000 0.180000
0.459000 0.402000 0.048000 0.091000
0.805000 0.040000 0.096000 0.059000
URL http://jaspar.genereg.net/matrix/MA0936.1
MOTIF MA0937.1 NAC055
letter-probability matrix: alength= 4 w= 8 nsites= 1000 E= 0
0.796000 0.026000 0.044000 0.134000
0.019019 0.774775 0.018018 0.188188
0.969031 0.017982 0.003996 0.008991
0.022000 0.960000 0.006000 0.012000
0.016000 0.016000 0.948000 0.020000
0.014000 0.116000 0.134000 0.736000
0.878879 0.080080 0.004004 0.037037
0.866000 0.009000 0.004000 0.121000
URL http://jaspar.genereg.net/matrix/MA0937.1
MOTIF MA0939.1 NAC079
letter-probability matrix: alength= 4 w= 8 nsites= 1000 E= 0
0.665000 0.001000 0.222000 0.112000
0.000999 0.690310 0.000999 0.307692
0.997003 0.000999 0.000999 0.000999
0.000999 0.997003 0.000999 0.000999
0.000999 0.000999 0.997003 0.000999
0.001000 0.855000 0.001000 0.143000
0.784000 0.072000 0.001000 0.143000
0.997003 0.000999 0.000999 0.000999
URL http://jaspar.genereg.net/matrix/MA0939.1
MOTIF MA0940.1 AP1
letter-probability matrix: alength= 4 w= 13 nsites= 1622 E= 0
0.452528 0.492602 0.019729 0.035142
0.051788 0.580148 0.024044 0.344020
0.815660 0.028360 0.021578 0.134402
0.699137 0.011714 0.093711 0.195438
0.956227 0.006165 0.009248 0.028360
0.787300 0.009248 0.014797 0.188656
0.734279 0.014180 0.155364 0.096178
0.420469 0.012947 0.158446 0.408138
0.402589 0.007398 0.573366 0.016646
0.081998 0.036991 0.834772 0.046239
0.706535 0.094328 0.104809 0.094328
0.788533 0.075216 0.103576 0.032676
0.774969 0.013564 0.099877 0.111591
URL http://jaspar.genereg.net/matrix/MA0940.1
MOTIF MA0946.1 ARR11
letter-probability matrix: alength= 4 w= 8 nsites= 1000 E= 0
0.625000 0.051000 0.055000 0.269000
0.927928 0.011011 0.029029 0.032032
0.005000 0.002000 0.982000 0.011000
0.989990 0.002002 0.004004 0.004004
0.007007 0.003003 0.002002 0.987988
0.732000 0.022000 0.004000 0.242000
0.003000 0.833000 0.002000 0.162000
0.014000 0.005000 0.968000 0.013000
URL http://jaspar.genereg.net/matrix/MA0946.1
MOTIF MA0947.1 ARR14
letter-probability matrix: alength= 4 w= 8 nsites= 1000 E= 0
0.945000 0.005000 0.026000 0.024000
0.002000 0.001000 0.984000 0.013000
0.991000 0.001000 0.003000 0.005000
0.002000 0.003000 0.002000 0.993000
0.506000 0.154000 0.001000 0.339000
0.001000 0.960000 0.001000 0.038000
0.009990 0.004995 0.959041 0.025974
0.083000 0.484000 0.401000 0.032000
URL http://jaspar.genereg.net/matrix/MA0947.1
MOTIF MA0950.1 ATHB-12
letter-probability matrix: alength= 4 w= 8 nsites= 1001 E= 0
0.578422 0.190809 0.106893 0.123876
0.668000 0.046000 0.053000 0.233000
0.018000 0.035000 0.006000 0.941000
0.048000 0.201000 0.633000 0.118000
0.965000 0.007000 0.015000 0.013000
0.009000 0.008000 0.017000 0.966000
0.030030 0.010010 0.019019 0.940941
0.128000 0.018000 0.766000 0.088000
URL http://jaspar.genereg.net/matrix/MA0950.1
MOTIF MA0951.1 ATHB-16
letter-probability matrix: alength= 4 w= 8 nsites= 1000 E= 0
0.072000 0.214000 0.001000 0.713000
1.000000 0.000000 0.000000 0.000000
1.000000 0.000000 0.000000 0.000000
0.000000 0.000000 0.000000 1.000000
0.545000 0.318000 0.137000 0.000000
1.000000 0.000000 0.000000 0.000000
0.000000 0.000000 0.000000 1.000000
0.067000 0.001000 0.067000 0.865000
URL http://jaspar.genereg.net/matrix/MA0951.1
MOTIF MA0952.1 ATHB-51
letter-probability matrix: alength= 4 w= 8 nsites= 999 E= 0
0.691692 0.253253 0.004004 0.051051
0.984016 0.004995 0.003996 0.006993
0.002002 0.008008 0.001001 0.988989
0.411000 0.006000 0.003000 0.580000
0.990000 0.002000 0.005000 0.003000
0.010000 0.002000 0.004000 0.984000
0.005000 0.018000 0.012000 0.965000
0.105000 0.018000 0.777000 0.100000
URL http://jaspar.genereg.net/matrix/MA0952.1
MOTIF MA0967.1 BZIP60
letter-probability matrix: alength= 4 w= 8 nsites= 999 E= 0
0.018018 0.064064 0.024024 0.893894
0.026026 0.059059 0.840841 0.074074
0.891109 0.016983 0.042957 0.048951
0.013000 0.799000 0.013000 0.175000
0.175000 0.013000 0.799000 0.013000
0.048951 0.042957 0.016983 0.891109
0.074074 0.840841 0.059059 0.026026
0.893894 0.024024 0.064064 0.018018
URL http://jaspar.genereg.net/matrix/MA0967.1
MOTIF MA0972.1 CCA1
letter-probability matrix: alength= 4 w= 8 nsites= 999 E= 0
0.934935 0.001001 0.010010 0.054054
0.960000 0.001000 0.037000 0.002000
0.985000 0.004000 0.010000 0.001000
0.035000 0.000000 0.005000 0.960000
0.992000 0.005000 0.001000 0.002000
0.001000 0.012000 0.001000 0.986000
0.005000 0.991000 0.000000 0.004000
0.021000 0.091000 0.014000 0.874000
URL http://jaspar.genereg.net/matrix/MA0972.1
MOTIF MA0975.1 CRF2
letter-probability matrix: alength= 4 w= 8 nsites= 1001 E= 0
0.043956 0.477522 0.347652 0.130869
0.108108 0.783784 0.081081 0.027027
0.000000 0.000000 1.000000 0.000000
0.000000 0.977000 0.023000 0.000000
0.000000 1.000000 0.000000 0.000000
0.000000 0.000000 1.000000 0.000000
0.023000 0.931000 0.000000 0.046000
0.118000 0.735000 0.059000 0.088000
URL http://jaspar.genereg.net/matrix/MA0975.1
MOTIF MA0977.1 DOF2.5
letter-probability matrix: alength= 4 w= 8 nsites= 1000 E= 0
0.756000 0.026000 0.182000 0.036000
0.598000 0.001000 0.012000 0.389000
0.990000 0.001000 0.004000 0.005000
0.985015 0.000999 0.007992 0.005994
0.744000 0.001000 0.254000 0.001000
0.004000 0.001000 0.977000 0.018000
0.008000 0.198000 0.065000 0.729000
0.238238 0.044044 0.557558 0.160160
URL http://jaspar.genereg.net/matrix/MA0977.1
MOTIF MA0978.1 DREB1E
letter-probability matrix: alength= 4 w= 8 nsites= 999 E= 0
0.978979 0.002002 0.015015 0.004004
0.009000 0.015000 0.003000 0.973000
0.005994 0.000999 0.990010 0.002997
0.003000 0.003000 0.002000 0.992000
0.003000 0.992000 0.001000 0.004000
0.002000 0.002000 0.992000 0.004000
0.169169 0.000000 0.828829 0.002002
0.001000 0.790000 0.001000 0.208000
URL http://jaspar.genereg.net/matrix/MA0978.1
MOTIF MA0986.1 DREB2C
letter-probability matrix: alength= 4 w= 8 nsites= 1001 E= 0
0.109890 0.756244 0.120879 0.012987
0.809000 0.003000 0.185000 0.003000
0.004000 0.985000 0.003000 0.008000
0.007000 0.986000 0.003000 0.004000
0.008008 0.003003 0.984985 0.004004
0.776000 0.158000 0.047000 0.019000
0.005000 0.977000 0.005000 0.013000
0.806000 0.050000 0.027000 0.117000
URL http://jaspar.genereg.net/matrix/MA0986.1
MOTIF MA1012.1 AGL27
letter-probability matrix: alength= 4 w= 14 nsites= 142 E= 0
0.176056 0.549296 0.176056 0.098592
0.007042 0.028169 0.000000 0.964789
0.000000 0.000000 0.000000 1.000000
0.098592 0.000000 0.007042 0.894366
0.000000 1.000000 0.000000 0.000000
0.000000 0.387324 0.000000 0.612676
0.760563 0.000000 0.007042 0.232394
0.225352 0.014085 0.000000 0.760563
0.063380 0.000000 0.000000 0.936620
0.014085 0.000000 0.000000 0.985915
0.105634 0.147887 0.014085 0.732394
0.119718 0.105634 0.295775 0.478873
0.232394 0.000000 0.767606 0.000000
0.077465 0.014085 0.647887 0.260563
URL http://jaspar.genereg.net/matrix/MA1012.1
MOTIF MA1013.1 GATA10
letter-probability matrix: alength= 4 w= 8 nsites= 999 E= 0
0.100100 0.067067 0.133133 0.699700
0.841000 0.027000 0.132000 0.000000
0.000000 0.000000 1.000000 0.000000
1.000000 0.000000 0.000000 0.000000
0.000000 0.000000 0.000000 1.000000
0.000000 1.000000 0.000000 0.000000
0.000000 0.111000 0.084000 0.805000
0.111111 0.111111 0.740741 0.037037
URL http://jaspar.genereg.net/matrix/MA1013.1
MOTIF MA1014.1 GATA11
letter-probability matrix: alength= 4 w= 8 nsites= 1000 E= 0
0.167000 0.042000 0.167000 0.624000
0.902903 0.000000 0.097097 0.000000
0.000000 0.000000 1.000000 0.000000
1.000000 0.000000 0.000000 0.000000
0.000000 0.000000 0.000000 1.000000
0.000000 1.000000 0.000000 0.000000
0.000000 0.000000 0.000000 1.000000
0.043956 0.130869 0.694306 0.130869
URL http://jaspar.genereg.net/matrix/MA1014.1
MOTIF MA1020.1 GT-1
letter-probability matrix: alength= 4 w= 8 nsites= 999 E= 0
0.000000 0.150150 0.649650 0.200200
0.000000 0.067067 0.000000 0.932933
0.030000 0.000000 0.000000 0.970000
1.000000 0.000000 0.000000 0.000000
0.971000 0.029000 0.000000 0.000000
0.030000 0.970000 0.000000 0.000000
0.000000 0.939000 0.000000 0.061000
0.624000 0.167000 0.125000 0.084000
URL http://jaspar.genereg.net/matrix/MA1020.1
MOTIF MA1028.1 KAN4
letter-probability matrix: alength= 4 w= 8 nsites= 1000 E= 0
0.011000 0.010000 0.965000 0.014000
0.941000 0.012000 0.026000 0.021000
0.904096 0.001998 0.001998 0.091908
0.002000 0.102000 0.003000 0.893000
0.893000 0.003000 0.102000 0.002000
0.091908 0.001998 0.001998 0.904096
0.021000 0.026000 0.012000 0.941000
0.014000 0.965000 0.010000 0.011000
URL http://jaspar.genereg.net/matrix/MA1028.1
MOTIF MA1033.1 OJ1058_F05.8
letter-probability matrix: alength= 4 w= 8 nsites= 999 E= 0
0.661662 0.332332 0.003003 0.003003
0.003003 0.990991 0.003003 0.003003
0.990991 0.003003 0.003003 0.003003
0.003003 0.990991 0.003003 0.003003
0.003003 0.003003 0.990991 0.003003
0.003003 0.003003 0.003003 0.990991
0.003003 0.003003 0.990991 0.003003
0.005000 0.005000 0.495000 0.495000
URL http://jaspar.genereg.net/matrix/MA1033.1
MOTIF MA1034.1 Os05g0497200
letter-probability matrix: alength= 4 w= 8 nsites= 999 E= 0
0.003003 0.990991 0.003003 0.003003
0.003003 0.003003 0.990991 0.003003
0.003003 0.661662 0.332332 0.003003
0.003003 0.990991 0.003003 0.003003
0.003003 0.003003 0.990991 0.003003
0.003003 0.990991 0.003003 0.003003
0.003003 0.990991 0.003003 0.003003
0.495000 0.005000 0.495000 0.005000
URL http://jaspar.genereg.net/matrix/MA1034.1
MOTIF MA1036.1 MYB111
letter-probability matrix: alength= 4 w= 8 nsites= 1000 E= 0
0.229000 0.004000 0.757000 0.010000
0.005000 0.002000 0.636000 0.357000
0.003000 0.012000 0.004000 0.981000
0.874000 0.007000 0.010000 0.109000
0.018000 0.004000 0.976000 0.002000
0.006000 0.008000 0.858000 0.128000
0.006000 0.004000 0.005000 0.985000
0.525000 0.030000 0.390000 0.055000
URL http://jaspar.genereg.net/matrix/MA1036.1
MOTIF MA1039.1 MYB4
letter-probability matrix: alength= 4 w= 8 nsites= 999 E= 0
0.253253 0.036036 0.674675 0.036036
0.009000 0.000000 0.766000 0.225000
0.000000 0.009000 0.000000 0.991000
0.565000 0.009000 0.035000 0.391000
0.026000 0.000000 0.974000 0.000000
0.017982 0.017982 0.776224 0.187812
0.010000 0.000000 0.000000 0.990000
0.318681 0.072927 0.535465 0.072927
URL http://jaspar.genereg.net/matrix/MA1039.1
MOTIF MA1040.1 MYB46
letter-probability matrix: alength= 4 w= 8 nsites= 1000 E= 0
0.081000 0.003000 0.911000 0.005000
0.003000 0.002000 0.387000 0.608000
0.006006 0.007007 0.001001 0.985986
0.836000 0.030000 0.006000 0.128000
0.003996 0.003996 0.990010 0.001998
0.004995 0.002997 0.897103 0.094905
0.002000 0.033000 0.001000 0.964000
0.580000 0.024000 0.358000 0.038000
URL http://jaspar.genereg.net/matrix/MA1040.1
MOTIF MA1041.1 MYB55
letter-probability matrix: alength= 4 w= 8 nsites= 1000 E= 0
0.980000 0.001000 0.016000 0.003000
0.048000 0.946000 0.002000 0.004000
0.002002 0.989990 0.002002 0.006006
0.227000 0.049000 0.023000 0.701000
0.979000 0.001000 0.016000 0.004000
0.267000 0.730000 0.001000 0.002000
0.002000 0.958000 0.001000 0.039000
0.118000 0.054000 0.756000 0.072000
URL http://jaspar.genereg.net/matrix/MA1041.1
MOTIF MA1042.1 MYB59
letter-probability matrix: alength= 4 w= 8 nsites= 999 E= 0
0.357357 0.014014 0.548549 0.080080
0.017000 0.007000 0.114000 0.862000
0.031000 0.014000 0.006000 0.949000
0.873127 0.038961 0.016983 0.070929
0.017000 0.008000 0.956000 0.019000
0.023976 0.010989 0.947053 0.017982
0.039000 0.040000 0.005000 0.916000
0.552000 0.267000 0.023000 0.158000
URL http://jaspar.genereg.net/matrix/MA1042.1
MOTIF MA1046.1 NTL9
letter-probability matrix: alength= 4 w= 9 nsites= 1001 E= 0
0.009990 0.009990 0.009990 0.970030
0.005000 0.005000 0.005000 0.985000
0.985000 0.005000 0.005000 0.005000
0.985000 0.005000 0.005000 0.005000
0.005000 0.005000 0.985000 0.005000
0.005000 0.005000 0.005000 0.985000
0.985000 0.005000 0.005000 0.005000
0.985000 0.005000 0.005000 0.005000
0.009990 0.009990 0.009990 0.970030
URL http://jaspar.genereg.net/matrix/MA1046.1
MOTIF MA1048.1 ERF018
letter-probability matrix: alength= 4 w= 8 nsites= 1000 E= 0
0.581000 0.001000 0.412000 0.006000
0.001000 0.993000 0.002000 0.004000
0.006006 0.990991 0.002002 0.001001
0.002002 0.002002 0.993994 0.002002
0.718719 0.008008 0.065065 0.208208
0.003000 0.991000 0.001000 0.005000
0.044000 0.943000 0.001000 0.012000
0.735736 0.010010 0.070070 0.184184
URL http://jaspar.genereg.net/matrix/MA1048.1
MOTIF MA1051.1 RAP2-3
letter-probability matrix: alength= 4 w= 8 nsites= 1001 E= 0
0.118881 0.231768 0.542458 0.106893
0.147147 0.761762 0.033033 0.058058
0.007000 0.006000 0.982000 0.005000
0.006000 0.746000 0.244000 0.004000
0.016000 0.977000 0.004000 0.003000
0.006000 0.003000 0.976000 0.015000
0.109000 0.780000 0.026000 0.085000
0.257000 0.664000 0.006000 0.073000
URL http://jaspar.genereg.net/matrix/MA1051.1
MOTIF MA1053.1 ERF109
letter-probability matrix: alength= 4 w= 8 nsites= 999 E= 0
0.038038 0.287287 0.661662 0.013013
0.050000 0.936000 0.008000 0.006000
0.003000 0.005000 0.989000 0.003000
0.003000 0.827000 0.168000 0.002000
0.013000 0.982000 0.002000 0.003000
0.004000 0.013000 0.978000 0.005000
0.038038 0.862863 0.013013 0.086086
0.207000 0.773000 0.002000 0.018000
URL http://jaspar.genereg.net/matrix/MA1053.1
MOTIF MA1075.1 WRKY12
letter-probability matrix: alength= 4 w= 8 nsites= 1001 E= 0
0.171828 0.706294 0.075924 0.045954
0.070000 0.033000 0.819000 0.078000
0.020000 0.062000 0.005000 0.913000
0.010000 0.015000 0.029000 0.946000
0.007992 0.005994 0.953047 0.032967
0.970030 0.005994 0.009990 0.013986
0.029029 0.949950 0.005005 0.016016
0.025025 0.722723 0.101101 0.151151
URL http://jaspar.genereg.net/matrix/MA1075.1
MOTIF MA1080.1 WRKY23
letter-probability matrix: alength= 4 w= 8 nsites= 1000 E= 0
0.698000 0.001000 0.300000 0.001000
0.000999 0.000999 0.997003 0.000999
0.000999 0.000999 0.000999 0.997003
0.000999 0.997003 0.000999 0.000999
0.997003 0.000999 0.000999 0.000999
0.997003 0.000999 0.000999 0.000999
0.167000 0.831000 0.001000 0.001000
0.143143 0.143143 0.712713 0.001001
URL http://jaspar.genereg.net/matrix/MA1080.1
MOTIF MA1084.1 WRKY38
letter-probability matrix: alength= 4 w= 8 nsites= 1001 E= 0
0.151848 0.671329 0.072927 0.103896
0.068931 0.027972 0.848152 0.054945
0.026000 0.030000 0.021000 0.923000
0.008000 0.023000 0.039000 0.930000
0.009000 0.016000 0.961000 0.014000
0.955000 0.017000 0.010000 0.018000
0.016000 0.951000 0.013000 0.020000
0.015000 0.679000 0.017000 0.289000
URL http://jaspar.genereg.net/matrix/MA1084.1
MOTIF MA1091.1 WRKY62
letter-probability matrix: alength= 4 w= 8 nsites= 1001 E= 0
0.125874 0.125874 0.000999 0.747253
0.307692 0.000999 0.690310 0.000999
0.000999 0.000999 0.997003 0.000999
0.000999 0.000999 0.000999 0.997003
0.000999 0.997003 0.000999 0.000999
0.997003 0.000999 0.000999 0.000999
0.997003 0.000999 0.000999 0.000999
0.272727 0.725275 0.000999 0.000999
URL http://jaspar.genereg.net/matrix/MA1091.1
MOTIF MA1161.1 TSO1
letter-probability matrix: alength= 4 w= 15 nsites= 264 E= 0
0.515152 0.056818 0.106061 0.321970
0.367424 0.034091 0.106061 0.492424
0.268939 0.041667 0.030303 0.659091
0.204545 0.022727 0.034091 0.738636
0.325758 0.143939 0.056818 0.473485
0.606061 0.098485 0.155303 0.140152
0.863636 0.000000 0.132576 0.003788
0.878788 0.003788 0.060606 0.056818
0.924242 0.000000 0.000000 0.075758
0.000000 0.030303 0.011364 0.958333
0.000000 0.000000 0.000000 1.000000
0.000000 0.261364 0.000000 0.738636
0.810606 0.000000 0.170455 0.018939
1.000000 0.000000 0.000000 0.000000
1.000000 0.000000 0.000000 0.000000
URL http://jaspar.genereg.net/matrix/MA1161.1
MOTIF MA1162.1 TCX2
letter-probability matrix: alength= 4 w= 15 nsites= 599 E= 0
0.429048 0.081803 0.101836 0.387312
0.225376 0.038397 0.046745 0.689482
0.100167 0.068447 0.001669 0.829716
0.090150 0.288815 0.068447 0.552588
0.487479 0.220367 0.178631 0.113523
0.933222 0.010017 0.043406 0.013356
0.924875 0.023372 0.001669 0.050083
0.858097 0.000000 0.023372 0.118531
0.016694 0.001669 0.011686 0.969950
0.000000 0.000000 0.000000 1.000000
0.000000 0.530885 0.000000 0.469115
0.726210 0.001669 0.272120 0.000000
1.000000 0.000000 0.000000 0.000000
1.000000 0.000000 0.000000 0.000000
0.297162 0.155259 0.016694 0.530885
URL http://jaspar.genereg.net/matrix/MA1162.1
MOTIF MA1169.1 MYB105
letter-probability matrix: alength= 4 w= 13 nsites= 95 E= 0
0.378947 0.000000 0.136842 0.484211
0.189474 0.221053 0.063158 0.526316
0.368421 0.305263 0.031579 0.294737
0.368421 0.073684 0.231579 0.326316
0.463158 0.052632 0.000000 0.484211
0.442105 0.031579 0.084211 0.442105
0.831579 0.000000 0.010526 0.157895
0.000000 1.000000 0.000000 0.000000
0.031579 0.894737 0.073684 0.000000
0.000000 0.000000 1.000000 0.000000
0.000000 0.000000 0.000000 1.000000
0.000000 0.000000 0.010526 0.989474
0.842105 0.021053 0.063158 0.073684
URL http://jaspar.genereg.net/matrix/MA1169.1
MOTIF MA1188.1 At3g11280
letter-probability matrix: alength= 4 w= 14 nsites= 582 E= 0
0.620275 0.079038 0.103093 0.197595
0.446735 0.027491 0.048110 0.477663
0.049828 0.560137 0.058419 0.331615
0.201031 0.618557 0.109966 0.070447
0.000000 0.029210 0.000000 0.970790
0.006873 0.159794 0.000000 0.833333
1.000000 0.000000 0.000000 0.000000
0.000000 0.005155 0.010309 0.984536
0.000000 1.000000 0.000000 0.000000
0.206186 0.247423 0.037801 0.508591
0.209622 0.108247 0.089347 0.592784
0.324742 0.335052 0.087629 0.252577
0.498282 0.025773 0.048110 0.427835
0.192440 0.266323 0.051546 0.489691
URL http://jaspar.genereg.net/matrix/MA1188.1
MOTIF MA1199.1 AGL16
letter-probability matrix: alength= 4 w= 15 nsites= 418 E= 0
0.083732 0.045455 0.009569 0.861244
0.026316 0.000000 0.007177 0.966507
0.239234 0.026316 0.066986 0.667464
0.000000 1.000000 0.000000 0.000000
0.000000 0.854067 0.000000 0.145933
0.294258 0.198565 0.055024 0.452153
0.157895 0.184211 0.095694 0.562201
0.313397 0.000000 0.000000 0.686603
0.000000 0.009569 0.009569 0.980861
0.105263 0.141148 0.055024 0.698565
0.260766 0.083732 0.322967 0.332536
0.148325 0.000000 0.851675 0.000000
0.000000 0.000000 0.940191 0.059809
0.502392 0.105263 0.028708 0.363636
0.856459 0.035885 0.019139 0.088517
URL http://jaspar.genereg.net/matrix/MA1199.1
MOTIF MA1203.1 AGL63
letter-probability matrix: alength= 4 w= 15 nsites= 597 E= 0
0.152429 0.010050 0.065327 0.772194
0.157454 0.055276 0.324958 0.462312
0.013400 0.969849 0.000000 0.016750
0.016750 0.911223 0.000000 0.072027
0.743719 0.058626 0.135678 0.061977
0.765494 0.015075 0.055276 0.164154
0.907873 0.000000 0.000000 0.092127
0.763819 0.001675 0.001675 0.232831
0.690117 0.046901 0.045226 0.217755
0.170854 0.167504 0.040201 0.621441
0.107203 0.000000 0.874372 0.018425
0.006700 0.000000 0.989950 0.003350
0.472362 0.393635 0.033501 0.100503
0.914573 0.021776 0.003350 0.060302
0.792295 0.016750 0.046901 0.144054
URL http://jaspar.genereg.net/matrix/MA1203.1
MOTIF MA1204.1 AGL13
letter-probability matrix: alength= 4 w= 18 nsites= 219 E= 0
0.269406 0.013699 0.000000 0.716895
0.041096 0.000000 0.009132 0.949772
0.561644 0.009132 0.114155 0.315068
0.009132 0.990868 0.000000 0.000000
0.000000 0.735160 0.000000 0.264840
0.643836 0.164384 0.031963 0.159817
0.771689 0.009132 0.031963 0.187215
1.000000 0.000000 0.000000 0.000000
0.794521 0.000000 0.000000 0.205479
0.794521 0.036530 0.027397 0.141553
0.369863 0.054795 0.068493 0.506849
0.337900 0.000000 0.662100 0.000000
0.000000 0.000000 0.990868 0.009132
0.547945 0.068493 0.022831 0.360731
0.954338 0.013699 0.000000 0.031963
0.872146 0.000000 0.018265 0.109589
0.575342 0.063927 0.187215 0.173516
0.410959 0.086758 0.091324 0.410959
URL http://jaspar.genereg.net/matrix/MA1204.1
MOTIF MA1205.1 AGL6
letter-probability matrix: alength= 4 w= 19 nsites= 482 E= 0
0.172199 0.016598 0.010373 0.800830
0.149378 0.002075 0.016598 0.831950
0.414938 0.016598 0.139004 0.429461
0.022822 0.964730 0.010373 0.002075
0.002075 0.817427 0.000000 0.180498
0.524896 0.190871 0.080913 0.203320
0.719917 0.016598 0.087137 0.176349
0.968880 0.000000 0.004149 0.026971
0.875519 0.000000 0.000000 0.124481
0.798755 0.037344 0.047718 0.116183
0.427386 0.101660 0.070539 0.400415
0.265560 0.000000 0.732365 0.002075
0.000000 0.000000 1.000000 0.000000
0.612033 0.147303 0.026971 0.213693
0.914938 0.008299 0.006224 0.070539
0.896266 0.008299 0.018672 0.076763
0.512448 0.126556 0.234440 0.126556
0.531120 0.056017 0.095436 0.317427
0.491701 0.085062 0.053942 0.369295
URL http://jaspar.genereg.net/matrix/MA1205.1
MOTIF MA1221.1 RAP2-6
letter-probability matrix: alength= 4 w= 15 nsites= 597 E= 0
0.172529 0.232831 0.030151 0.564489
0.107203 0.036851 0.546064 0.309883
0.313233 0.018425 0.638191 0.030151
0.001675 0.961474 0.000000 0.036851
0.000000 0.000000 1.000000 0.000000
0.001675 0.025126 0.973199 0.000000
0.013400 0.949749 0.000000 0.036851
0.000000 0.005025 0.969849 0.025126
0.025126 0.100503 0.855946 0.018425
0.329983 0.519263 0.023451 0.127303
0.112228 0.015075 0.760469 0.112228
0.244556 0.078727 0.591290 0.085427
0.335008 0.289782 0.082077 0.293132
0.190955 0.053601 0.564489 0.190955
0.179229 0.103853 0.579564 0.137353
URL http://jaspar.genereg.net/matrix/MA1221.1
MOTIF MA1222.1 ERF014
letter-probability matrix: alength= 4 w= 15 nsites= 595 E= 0
0.102521 0.574790 0.087395 0.235294
0.134454 0.663866 0.067227 0.134454
0.394958 0.095798 0.233613 0.275630
0.127731 0.606723 0.082353 0.183193
0.131092 0.680672 0.055462 0.132773
0.240336 0.042017 0.346218 0.371429
0.038655 0.749580 0.065546 0.146218
0.001681 0.994958 0.000000 0.003361
0.858824 0.000000 0.122689 0.018487
0.000000 1.000000 0.000000 0.000000
0.000000 1.000000 0.000000 0.000000
0.045378 0.000000 0.954622 0.000000
0.275630 0.515966 0.015126 0.193277
0.000000 0.993277 0.000000 0.006723
0.589916 0.003361 0.230252 0.176471
URL http://jaspar.genereg.net/matrix/MA1222.1
MOTIF MA1225.1 ERF5
letter-probability matrix: alength= 4 w= 15 nsites= 580 E= 0
0.101724 0.636207 0.065517 0.196552
0.151724 0.663793 0.024138 0.160345
0.368966 0.072414 0.310345 0.248276
0.055172 0.620690 0.124138 0.200000
0.100000 0.851724 0.008621 0.039655
0.139655 0.000000 0.637931 0.222414
0.005172 0.912069 0.055172 0.027586
0.027586 0.972414 0.000000 0.000000
0.117241 0.000000 0.867241 0.015517
0.006897 0.925862 0.034483 0.032759
0.006897 0.993103 0.000000 0.000000
0.125862 0.000000 0.801724 0.072414
0.005172 0.720690 0.029310 0.244828
0.094828 0.731034 0.050000 0.124138
0.410345 0.029310 0.377586 0.182759
URL http://jaspar.genereg.net/matrix/MA1225.1
MOTIF MA1235.1 AIL7
letter-probability matrix: alength= 4 w= 11 nsites= 539 E= 0
0.020408 0.955473 0.001855 0.022263
0.211503 0.031540 0.705009 0.051948
0.337662 0.191095 0.293135 0.178108
0.421150 0.085343 0.055659 0.437848
0.159555 0.074212 0.020408 0.745826
0.172542 0.461967 0.003711 0.361781
0.061224 0.571429 0.000000 0.367347
0.000000 1.000000 0.000000 0.000000
0.246753 0.033395 0.654917 0.064935
0.959184 0.000000 0.000000 0.040816
0.059369 0.011132 0.747681 0.181818
URL http://jaspar.genereg.net/matrix/MA1235.1
MOTIF MA1274.1 DOF3.6
letter-probability matrix: alength= 4 w= 21 nsites= 600 E= 0
0.095000 0.171667 0.151667 0.581667
0.100000 0.171667 0.003333 0.725000
0.218333 0.153333 0.070000 0.558333
0.488333 0.111667 0.120000 0.280000
0.001667 0.925000 0.003333 0.070000
0.001667 0.038333 0.000000 0.960000
0.000000 0.020000 0.000000 0.980000
0.001667 0.001667 0.000000 0.996667
0.143333 0.035000 0.003333 0.818333
0.120000 0.168333 0.058333 0.653333
0.228333 0.258333 0.141667 0.371667
0.245000 0.250000 0.053333 0.451667
0.105000 0.270000 0.088333 0.536667
0.103333 0.163333 0.058333 0.675000
0.103333 0.143333 0.006667 0.746667
0.105000 0.208333 0.001667 0.685000
0.163333 0.098333 0.086667 0.651667
0.131667 0.206667 0.101667 0.560000
0.106667 0.183333 0.110000 0.600000
0.191667 0.173333 0.073333 0.561667
0.203333 0.140000 0.100000 0.556667
URL http://jaspar.genereg.net/matrix/MA1274.1
MOTIF MA1309.1 WRKY3
letter-probability matrix: alength= 4 w= 11 nsites= 598 E= 0
0.543478 0.220736 0.105351 0.130435
0.675585 0.125418 0.056856 0.142140
0.645485 0.103679 0.043478 0.207358
0.780936 0.000000 0.219064 0.000000
0.000000 0.000000 1.000000 0.000000
0.000000 0.000000 0.000000 1.000000
0.000000 0.998328 0.000000 0.001672
1.000000 0.000000 0.000000 0.000000
1.000000 0.000000 0.000000 0.000000
0.301003 0.665552 0.001672 0.031773
0.177258 0.115385 0.580268 0.127090
URL http://jaspar.genereg.net/matrix/MA1309.1
MOTIF MA1324.1 GATA20
letter-probability matrix: alength= 4 w= 8 nsites= 76 E= 0
0.921053 0.000000 0.013158 0.065789
0.000000 0.105263 0.000000 0.894737
0.026316 0.921053 0.000000 0.052632
0.171053 0.328947 0.500000 0.000000
0.000000 0.000000 1.000000 0.000000
1.000000 0.000000 0.000000 0.000000
0.000000 0.000000 0.000000 1.000000
0.026316 0.960526 0.000000 0.013158
URL http://jaspar.genereg.net/matrix/MA1324.1
MOTIF MA1328.1 ZHD9
letter-probability matrix: alength= 4 w= 15 nsites= 600 E= 0
0.401667 0.018333 0.018333 0.561667
0.253333 0.075000 0.028333 0.643333
0.376667 0.086667 0.006667 0.530000
0.553333 0.153333 0.110000 0.183333
0.368333 0.126667 0.170000 0.335000
0.230000 0.228333 0.091667 0.450000
0.290000 0.303333 0.155000 0.251667
0.403333 0.291667 0.211667 0.093333
0.025000 0.375000 0.031667 0.568333
0.006667 0.001667 0.000000 0.991667
1.000000 0.000000 0.000000 0.000000
0.998333 0.000000 0.001667 0.000000
0.006667 0.015000 0.000000 0.978333
0.000000 0.370000 0.010000 0.620000
0.898333 0.021667 0.053333 0.026667
URL http://jaspar.genereg.net/matrix/MA1328.1
MOTIF MA1335.1 TGA4
letter-probability matrix: alength= 4 w= 11 nsites= 600 E= 0
0.073333 0.205000 0.000000 0.721667
0.036667 0.195000 0.663333 0.105000
0.943333 0.005000 0.008333 0.043333
0.000000 0.968333 0.000000 0.031667
0.118333 0.003333 0.878333 0.000000
0.000000 0.003333 0.000000 0.996667
0.070000 0.930000 0.000000 0.000000
0.998333 0.001667 0.000000 0.000000
0.000000 0.148333 0.325000 0.526667
0.030000 0.833333 0.061667 0.075000
0.570000 0.103333 0.185000 0.141667
URL http://jaspar.genereg.net/matrix/MA1335.1
MOTIF MA1339.1 BZIP43
letter-probability matrix: alength= 4 w= 12 nsites= 28 E= 0
0.000000 0.000000 0.678571 0.321429
0.107143 0.892857 0.000000 0.000000
0.000000 1.000000 0.000000 0.000000
1.000000 0.000000 0.000000 0.000000
0.000000 0.964286 0.000000 0.035714
0.000000 0.000000 1.000000 0.000000
0.000000 0.000000 0.000000 1.000000
0.000000 0.964286 0.035714 0.000000
0.964286 0.000000 0.000000 0.035714
0.000000 0.000000 0.857143 0.142857
0.107143 0.892857 0.000000 0.000000
0.642857 0.107143 0.035714 0.214286
URL http://jaspar.genereg.net/matrix/MA1339.1
MOTIF MA1348.1 TGA9
letter-probability matrix: alength= 4 w= 11 nsites= 592 E= 0
0.086149 0.086149 0.812500 0.015203
0.537162 0.334459 0.128378 0.000000
0.013514 0.000000 0.001689 0.984797
0.000000 0.000000 0.888514 0.111486
0.998311 0.000000 0.001689 0.000000
0.000000 0.925676 0.000000 0.074324
0.018581 0.000000 0.981419 0.000000
0.001689 0.000000 0.000000 0.998311
0.027027 0.932432 0.040541 0.000000
0.957770 0.000000 0.042230 0.000000
0.021959 0.403716 0.128378 0.445946
URL http://jaspar.genereg.net/matrix/MA1348.1
MOTIF MA1350.1 BZIP42
letter-probability matrix: alength= 4 w= 12 nsites= 67 E= 0
0.194030 0.044776 0.000000 0.761194
0.014925 0.000000 0.955224 0.029851
0.134328 0.820896 0.044776 0.000000
0.000000 0.000000 0.000000 1.000000
0.000000 0.000000 0.970149 0.029851
1.000000 0.000000 0.000000 0.000000
0.000000 1.000000 0.000000 0.000000
0.014925 0.000000 0.985075 0.000000
0.014925 0.000000 0.000000 0.985075
0.000000 0.000000 1.000000 0.000000
0.000000 0.000000 0.865672 0.134328
0.268657 0.731343 0.000000 0.000000
URL http://jaspar.genereg.net/matrix/MA1350.1
MOTIF MA1352.1 TRP1
letter-probability matrix: alength= 4 w= 21 nsites= 307 E= 0
0.824104 0.013029 0.026059 0.136808
0.061889 0.814332 0.035831 0.087948
0.055375 0.856678 0.045603 0.042345
0.097720 0.710098 0.035831 0.156352
0.094463 0.000000 0.009772 0.895765
0.983713 0.000000 0.006515 0.009772
0.990228 0.000000 0.003257 0.006515
1.000000 0.000000 0.000000 0.000000
0.013029 0.983713 0.000000 0.003257
0.042345 0.944625 0.000000 0.013029
0.003257 0.964169 0.019544 0.013029
0.009772 0.006515 0.006515 0.977199
0.964169 0.006515 0.006515 0.022801
0.960912 0.029316 0.006515 0.003257
0.996743 0.000000 0.000000 0.003257
0.009772 0.938111 0.003257 0.048860
0.019544 0.951140 0.013029 0.016287
0.078176 0.885993 0.000000 0.035831
0.042345 0.026059 0.003257 0.928339
0.944625 0.013029 0.019544 0.022801
0.856678 0.026059 0.091205 0.026059
URL http://jaspar.genereg.net/matrix/MA1352.1
MOTIF MA1354.1 AT4G12670
letter-probability matrix: alength= 4 w= 29 nsites= 42 E= 0
0.000000 0.833333 0.000000 0.166667
0.071429 0.071429 0.000000 0.857143
0.976190 0.000000 0.000000 0.023810
0.976190 0.000000 0.000000 0.023810
0.928571 0.023810 0.023810 0.023810
0.000000 1.000000 0.000000 0.000000
0.095238 0.833333 0.023810 0.047619
0.000000 0.976190 0.000000 0.023810
0.023810 0.000000 0.023810 0.952381
0.904762 0.000000 0.023810 0.071429
0.952381 0.000000 0.047619 0.000000
0.928571 0.000000 0.071429 0.000000
0.023810 0.857143 0.000000 0.119048
0.000000 0.928571 0.047619 0.023810
0.142857 0.761905 0.023810 0.071429
0.023810 0.023810 0.000000 0.952381
1.000000 0.000000 0.000000 0.000000
0.809524 0.047619 0.023810 0.119048
0.857143 0.023810 0.047619 0.071429
0.047619 0.833333 0.047619 0.071429
0.166667 0.666667 0.000000 0.166667
0.000000 0.928571 0.000000 0.071429
0.190476 0.000000 0.000000 0.809524
0.904762 0.071429 0.000000 0.023810
0.952381 0.000000 0.000000 0.047619
0.952381 0.000000 0.023810 0.023810
0.119048 0.833333 0.000000 0.047619
0.000000 0.928571 0.023810 0.047619
0.000000 0.761905 0.095238 0.142857
URL http://jaspar.genereg.net/matrix/MA1354.1
MOTIF MA1356.1 TRP2
letter-probability matrix: alength= 4 w= 21 nsites= 425 E= 0
0.788235 0.080000 0.049412 0.082353
0.745882 0.056471 0.042353 0.155294
0.103529 0.712941 0.051765 0.131765
0.054118 0.809412 0.065882 0.070588
0.110588 0.640000 0.035294 0.214118
0.169412 0.000000 0.009412 0.821176
0.995294 0.000000 0.002353 0.002353
0.985882 0.002353 0.004706 0.007059
0.992941 0.004706 0.000000 0.002353
0.016471 0.978824 0.000000 0.004706
0.014118 0.974118 0.004706 0.007059
0.000000 0.978824 0.000000 0.021176
0.009412 0.007059 0.000000 0.983529
0.957647 0.004706 0.030588 0.007059
0.992941 0.002353 0.004706 0.000000
0.962353 0.009412 0.004706 0.023529
0.063529 0.823529 0.002353 0.110588
0.042353 0.901176 0.000000 0.056471
0.127059 0.712941 0.016471 0.143529
0.087059 0.101176 0.016471 0.795294
0.792941 0.065882 0.035294 0.105882
URL http://jaspar.genereg.net/matrix/MA1356.1
MOTIF MA1379.1 SOL1
letter-probability matrix: alength= 4 w= 15 nsites= 600 E= 0
0.320000 0.028333 0.045000 0.606667
0.158333 0.026667 0.010000 0.805000
0.278333 0.061667 0.011667 0.648333
0.365000 0.115000 0.076667 0.443333
0.735000 0.090000 0.116667 0.058333
0.905000 0.000000 0.071667 0.023333
0.776667 0.005000 0.110000 0.108333
0.806667 0.000000 0.038333 0.155000
0.000000 0.000000 0.000000 1.000000
0.000000 0.000000 0.000000 1.000000
0.000000 0.281667 0.000000 0.718333
0.803333 0.000000 0.196667 0.000000
0.925000 0.075000 0.000000 0.000000
0.998333 0.000000 0.001667 0.000000
0.446667 0.026667 0.000000 0.526667
URL http://jaspar.genereg.net/matrix/MA1379.1
MOTIF MA1380.1 TCX6
letter-probability matrix: alength= 4 w= 15 nsites= 597 E= 0
0.395310 0.000000 0.055276 0.549414
0.000000 0.000000 0.000000 1.000000
0.000000 0.000000 0.142379 0.857621
0.000000 0.137353 0.000000 0.862647
0.675042 0.000000 0.324958 0.000000
1.000000 0.000000 0.000000 0.000000
1.000000 0.000000 0.000000 0.000000
0.152429 0.026801 0.000000 0.820771
0.254606 0.160804 0.021776 0.562814
0.013400 0.050251 0.000000 0.936348
0.085427 0.030151 0.108878 0.775544
0.232831 0.075377 0.082077 0.609715
0.388610 0.026801 0.187605 0.396985
0.711893 0.013400 0.033501 0.241206
0.685092 0.031826 0.020101 0.262982
URL http://jaspar.genereg.net/matrix/MA1380.1
MOTIF MA1384.1 PHL7
letter-probability matrix: alength= 4 w= 13 nsites= 598 E= 0
0.575251 0.096990 0.150502 0.177258
0.583612 0.040134 0.157191 0.219064
0.503344 0.145485 0.183946 0.167224
0.436455 0.204013 0.359532 0.000000
0.000000 0.000000 1.000000 0.000000
0.754181 0.143813 0.001672 0.100334
1.000000 0.000000 0.000000 0.000000
0.000000 0.000000 0.000000 1.000000
0.887960 0.112040 0.000000 0.000000
0.005017 0.000000 0.000000 0.994983
0.147157 0.073579 0.021739 0.757525
0.023411 0.906355 0.008361 0.061873
0.043478 0.456522 0.190635 0.309365
URL http://jaspar.genereg.net/matrix/MA1384.1
MOTIF MA1402.1 BPC6
letter-probability matrix: alength= 4 w= 21 nsites= 188 E= 0
0.127660 0.712766 0.010638 0.148936
0.095745 0.101064 0.000000 0.803191
0.069149 0.856383 0.053191 0.021277
0.079787 0.037234 0.026596 0.856383
0.063830 0.755319 0.037234 0.143617
0.031915 0.010638 0.026596 0.930851
0.000000 0.851064 0.015957 0.132979
0.010638 0.031915 0.005319 0.952128
0.005319 0.941489 0.010638 0.042553
0.000000 0.005319 0.000000 0.994681
0.005319 0.893617 0.000000 0.101064
0.010638 0.000000 0.000000 0.989362
0.010638 0.989362 0.000000 0.000000
0.000000 0.005319 0.000000 0.994681
0.063830 0.898936 0.000000 0.037234
0.021277 0.015957 0.000000 0.962766
0.063830 0.893617 0.026596 0.015957
0.042553 0.031915 0.000000 0.925532
0.031915 0.904255 0.000000 0.063830
0.015957 0.010638 0.010638 0.962766
0.265957 0.654255 0.005319 0.074468
URL http://jaspar.genereg.net/matrix/MA1402.1
MOTIF MA1403.1 BPC5
letter-probability matrix: alength= 4 w= 30 nsites= 102 E= 0
0.931373 0.000000 0.068627 0.000000
0.029412 0.000000 0.970588 0.000000
1.000000 0.000000 0.000000 0.000000
0.019608 0.000000 0.960784 0.019608
0.980392 0.000000 0.000000 0.019608
0.009804 0.000000 0.970588 0.019608
0.970588 0.000000 0.000000 0.029412
0.000000 0.009804 0.980392 0.009804
0.970588 0.000000 0.019608 0.009804
0.009804 0.009804 0.980392 0.000000
1.000000 0.000000 0.000000 0.000000
0.000000 0.000000 1.000000 0.000000
1.000000 0.000000 0.000000 0.000000
0.039216 0.000000 0.950980 0.009804
0.990196 0.000000 0.009804 0.000000
0.019608 0.000000 0.980392 0.000000
0.990196 0.000000 0.009804 0.000000
0.009804 0.009804 0.980392 0.000000
0.960784 0.000000 0.009804 0.029412
0.009804 0.009804 0.970588 0.009804
0.990196 0.000000 0.009804 0.000000
0.000000 0.009804 0.990196 0.000000
0.980392 0.000000 0.000000 0.019608
0.009804 0.009804 0.970588 0.009804
0.960784 0.000000 0.029412 0.009804
0.009804 0.009804 0.970588 0.009804
0.960784 0.000000 0.000000 0.039216
0.000000 0.039216 0.960784 0.000000
0.980392 0.019608 0.000000 0.000000
0.049020 0.029412 0.892157 0.029412
URL http://jaspar.genereg.net/matrix/MA1403.1
MOTIF MA1404.1 BPC1
letter-probability matrix: alength= 4 w= 24 nsites= 539 E= 0
0.152134 0.033395 0.781076 0.033395
0.896104 0.007421 0.053803 0.042672
0.014842 0.027829 0.896104 0.061224
0.929499 0.000000 0.033395 0.037106
0.124304 0.016698 0.831169 0.027829
0.927644 0.000000 0.072356 0.000000
0.079777 0.031540 0.855288 0.033395
0.886827 0.005566 0.081633 0.025974
0.072356 0.000000 0.894249 0.033395
0.964750 0.011132 0.003711 0.020408
0.050093 0.003711 0.942486 0.003711
0.961039 0.020408 0.005566 0.012987
0.115028 0.016698 0.834879 0.033395
0.853432 0.000000 0.103896 0.042672
0.100186 0.000000 0.857143 0.042672
0.899814 0.000000 0.100186 0.000000
0.076067 0.018553 0.866419 0.038961
0.942486 0.000000 0.016698 0.040816
0.131725 0.003711 0.851577 0.012987
0.886827 0.022263 0.064935 0.025974
0.135436 0.035250 0.816327 0.012987
0.834879 0.027829 0.072356 0.064935
0.087199 0.037106 0.792208 0.083488
0.808905 0.040816 0.079777 0.070501
URL http://jaspar.genereg.net/matrix/MA1404.1
MOTIF MA1732.1 E2FD
letter-probability matrix: alength= 4 w= 15 nsites= 1000 E= 0
0.207650 0.009107 0.245902 0.537341
0.103825 0.001821 0.012750 0.881604
0.047359 0.003643 0.001821 0.947177
0.036430 0.000000 0.007286 0.956284
0.014572 0.001821 0.005464 0.978143
0.005464 0.003643 0.989072 0.001821
0.000000 0.000000 1.000000 0.000000
0.001821 0.998179 0.000000 0.000000
0.001821 0.000000 0.996358 0.001821
0.001821 0.014572 0.983607 0.000000
0.000000 0.010929 0.987250 0.001821
0.992714 0.000000 0.007286 0.000000
1.000000 0.000000 0.000000 0.000000
0.958106 0.012750 0.010929 0.018215
0.774135 0.051002 0.021858 0.153005
URL http://jaspar.genereg.net/matrix/MA1732.1
MOTIF MA1686.1 ARF13
letter-probability matrix: alength= 4 w= 14 nsites= 8406 E= 0
0.688556 0.094456 0.077564 0.139424
0.409945 0.064597 0.476921 0.048537
0.067690 0.800024 0.055080 0.077207
0.068522 0.017250 0.882703 0.031525
0.039020 0.003450 0.951820 0.005710
0.006543 0.006543 0.983940 0.002974
0.031882 0.007970 0.954318 0.005829
0.014038 0.010231 0.972520 0.003212
0.873662 0.013205 0.112182 0.000952
0.004283 0.985487 0.006543 0.003688
0.946110 0.003926 0.046752 0.003212
0.089103 0.509517 0.025458 0.375922
0.063288 0.061623 0.798239 0.076850
0.088627 0.061385 0.104092 0.745896
URL http://jaspar.genereg.net/matrix/MA1686.1
MOTIF MA1687.1 ARF14
letter-probability matrix: alength= 4 w= 16 nsites= 11085 E= 0
0.077763 0.742896 0.061434 0.117907
0.216779 0.051511 0.682273 0.049436
0.044926 0.235995 0.679477 0.039603
0.037618 0.239152 0.691385 0.031845
0.063329 0.200361 0.706089 0.030221
0.031574 0.016870 0.944159 0.007397
0.912314 0.014253 0.067388 0.006044
0.005683 0.979522 0.008480 0.006315
0.971493 0.005413 0.017591 0.005503
0.022102 0.336581 0.008751 0.632567
0.021019 0.008570 0.963735 0.006676
0.021110 0.026252 0.013532 0.939107
0.021019 0.905909 0.015968 0.057104
0.053496 0.253315 0.585476 0.107713
0.089761 0.232657 0.623365 0.054217
0.064862 0.233829 0.627605 0.073703
URL http://jaspar.genereg.net/matrix/MA1687.1
MOTIF MA1734.1 AT1G19040
letter-probability matrix: alength= 4 w= 16 nsites= 1000 E= 0
0.000000 1.000000 0.000000 0.000000
0.000000 0.000000 0.139415 0.860585
0.000000 0.000000 0.000000 1.000000
0.020654 0.032702 0.919105 0.027539
0.187608 0.344234 0.208262 0.259897
0.239243 0.127367 0.316695 0.316695
0.132530 0.512908 0.177281 0.177281
0.148021 0.418244 0.092943 0.340792
0.166954 0.351119 0.285714 0.196213
0.000000 0.948365 0.013769 0.037866
1.000000 0.000000 0.000000 0.000000
0.776248 0.223752 0.000000 0.000000
0.001721 0.000000 0.993115 0.005164
0.058520 0.271945 0.079174 0.590361
0.290878 0.146299 0.005164 0.557659
0.647160 0.012048 0.000000 0.340792
URL http://jaspar.genereg.net/matrix/MA1734.1
MOTIF MA1738.1 ATMYB31
letter-probability matrix: alength= 4 w= 15 nsites= 1000 E= 0
0.173986 0.505068 0.043919 0.277027
0.768581 0.113176 0.020270 0.097973
0.559121 0.285473 0.023649 0.131757
0.000000 0.753379 0.010135 0.236486
0.165541 0.244932 0.030405 0.559122
0.486486 0.302365 0.076014 0.135135
0.106419 0.807432 0.000000 0.086149
0.027027 0.765203 0.000000 0.207770
1.000000 0.000000 0.000000 0.000000
0.736487 0.258446 0.003378 0.001689
0.000000 1.000000 0.000000 0.000000
0.199324 0.373311 0.028716 0.398649
0.760135 0.045608 0.160473 0.033784
0.288851 0.527027 0.018581 0.165541
0.263514 0.439189 0.000000 0.297297
URL http://jaspar.genereg.net/matrix/MA1738.1
MOTIF MA1741.1 BRN2
letter-probability matrix: alength= 4 w= 16 nsites= 999 E= 0
0.036789 0.959867 0.000000 0.003344
0.000000 0.000000 0.269231 0.730769
0.000000 0.000000 0.005017 0.994983
0.198997 0.209030 0.536789 0.055184
0.389632 0.193980 0.107023 0.309365
0.456522 0.071906 0.212375 0.259197
0.321070 0.175585 0.165552 0.337793
0.168896 0.260870 0.140468 0.429766
0.331104 0.153846 0.182274 0.332776
0.006689 0.531773 0.048495 0.413043
0.998328 0.001672 0.000000 0.000000
0.301003 0.698997 0.000000 0.000000
0.001672 0.000000 0.924749 0.073579
0.050167 0.464883 0.031773 0.453177
0.441472 0.135452 0.006689 0.416388
0.792642 0.008361 0.000000 0.198997
URL http://jaspar.genereg.net/matrix/MA1741.1
MOTIF MA1746.1 BZIP69
letter-probability matrix: alength= 4 w= 11 nsites= 999 E= 0
0.084158 0.113861 0.034653 0.767328
0.019802 0.014851 0.900991 0.064356
0.480198 0.519802 0.000000 0.000000
0.000000 1.000000 0.000000 0.000000
1.000000 0.000000 0.000000 0.000000
0.000000 0.000000 1.000000 0.000000
0.000000 0.965347 0.004950 0.029703
0.000000 0.004950 0.000000 0.995050
0.000000 0.004950 0.990100 0.004950
0.004950 0.029703 0.321782 0.643565
0.420792 0.376238 0.059406 0.143564
URL http://jaspar.genereg.net/matrix/MA1746.1
MOTIF MA1749.1 E2FC
letter-probability matrix: alength= 4 w= 15 nsites= 1000 E= 0
0.913043 0.086957 0.000000 0.000000
0.347826 0.000000 0.130435 0.521739
0.391304 0.000000 0.217391 0.391304
0.347826 0.000000 0.217391 0.434783
0.260870 0.000000 0.217391 0.521739
0.173913 0.043478 0.782609 0.000000
0.000000 0.043478 0.782609 0.173913
0.217391 0.782609 0.000000 0.000000
0.000000 0.000000 1.000000 0.000000
0.000000 1.000000 0.000000 0.000000
0.000000 1.000000 0.000000 0.000000
0.913043 0.086957 0.000000 0.000000
0.826086 0.086957 0.000000 0.086957
0.913043 0.000000 0.086957 0.000000
0.695652 0.000000 0.260870 0.043478
URL http://jaspar.genereg.net/matrix/MA1749.1
MOTIF MA1750.1 E2FE
letter-probability matrix: alength= 4 w= 15 nsites= 1000 E= 0
0.207650 0.009107 0.245902 0.537341
0.103825 0.001821 0.012750 0.881604
0.047359 0.003643 0.001821 0.947177
0.036430 0.000000 0.007286 0.956284
0.014572 0.001821 0.005464 0.978143
0.005464 0.003643 0.989072 0.001821
0.000000 0.000000 1.000000 0.000000
0.001821 0.998179 0.000000 0.000000
0.001821 0.000000 0.996358 0.001821
0.001821 0.014572 0.983607 0.000000
0.000000 0.010929 0.987250 0.001821
0.992714 0.000000 0.007286 0.000000
1.000000 0.000000 0.000000 0.000000
0.958106 0.012750 0.010929 0.018215
0.774135 0.051002 0.021858 0.153005
URL http://jaspar.genereg.net/matrix/MA1750.1
MOTIF MA1783.1 NAC005
letter-probability matrix: alength= 4 w= 19 nsites= 1000 E= 0
0.222034 0.059322 0.027119 0.691525
0.361017 0.077966 0.091525 0.469492
0.415254 0.183051 0.271186 0.130508
0.000000 0.998305 0.000000 0.001695
0.000000 0.000000 0.003390 0.996610
0.000000 0.000000 0.000000 1.000000
0.235593 0.376271 0.286441 0.101695
0.125424 0.149153 0.093220 0.632203
0.189831 0.149153 0.171186 0.489831
0.179661 0.345763 0.062712 0.411864
0.320339 0.210169 0.115254 0.354237
0.494915 0.152542 0.177966 0.174576
0.020339 0.493220 0.062712 0.423729
0.998305 0.000000 0.001695 0.000000
0.994915 0.005085 0.000000 0.000000
0.000000 0.000000 1.000000 0.000000
0.062712 0.157627 0.116949 0.662712
0.281356 0.066102 0.020339 0.632203
0.462712 0.018644 0.020339 0.498305
URL http://jaspar.genereg.net/matrix/MA1783.1
MOTIF MA1784.1 NAC011
letter-probability matrix: alength= 4 w= 21 nsites= 1000 E= 0
0.236842 0.074561 0.548246 0.140351
0.004386 0.000000 0.000000 0.995614
0.026316 0.000000 0.008772 0.964912
0.188596 0.026316 0.543860 0.241228
0.000000 1.000000 0.000000 0.000000
0.000000 0.000000 0.048246 0.951754
0.000000 0.008772 0.000000 0.991228
0.105263 0.429825 0.372807 0.092105
0.271930 0.184211 0.135965 0.407895
0.280702 0.175439 0.298246 0.245614
0.276316 0.372807 0.100877 0.250000
0.214912 0.307018 0.131579 0.346491
0.372807 0.070175 0.311404 0.245614
0.000000 0.793860 0.105263 0.100877
0.995614 0.000000 0.004386 0.000000
0.793860 0.201754 0.000000 0.004386
0.000000 0.000000 1.000000 0.000000
0.162281 0.258772 0.118421 0.460526
0.618421 0.109649 0.017544 0.254386
0.899123 0.004386 0.004386 0.092105
0.118421 0.535088 0.092105 0.254386
URL http://jaspar.genereg.net/matrix/MA1784.1
MOTIF MA1788.1 NAC054
letter-probability matrix: alength= 4 w= 19 nsites= 1000 E= 0
0.008811 0.991189 0.000000 0.000000
0.000000 0.000000 0.299559 0.700441
0.000000 0.000000 0.000000 1.000000
0.180617 0.176211 0.621146 0.022026
0.233480 0.162996 0.114537 0.488987
0.229075 0.215859 0.220264 0.334802
0.193833 0.312775 0.189427 0.303965
0.334802 0.277533 0.101322 0.286344
0.656388 0.008811 0.189427 0.145374
0.000000 0.814978 0.000000 0.185022
1.000000 0.000000 0.000000 0.000000
0.123348 0.876652 0.000000 0.000000
0.000000 0.000000 0.995595 0.004405
0.044053 0.378855 0.105727 0.471366
0.378855 0.215859 0.013216 0.392070
0.885462 0.008811 0.008811 0.096916
0.171806 0.418502 0.136564 0.273128
0.123348 0.651982 0.101322 0.123348
0.193833 0.092511 0.123348 0.590308
URL http://jaspar.genereg.net/matrix/MA1788.1
MOTIF MA1789.1 NAC071
letter-probability matrix: alength= 4 w= 15 nsites= 1000 E= 0
0.005051 0.994949 0.000000 0.000000
0.000000 0.003367 0.134680 0.861953
0.000000 0.003367 0.000000 0.996633
0.045455 0.508417 0.338384 0.107744
0.414141 0.132997 0.102694 0.350168
0.228956 0.227273 0.126263 0.417508
0.183502 0.380471 0.134680 0.301347
0.116162 0.309764 0.124579 0.449495
0.149832 0.190236 0.122896 0.537036
0.028620 0.740740 0.146465 0.084175
1.000000 0.000000 0.000000 0.000000
0.632997 0.367003 0.000000 0.000000
0.001684 0.000000 0.968013 0.030303
0.089226 0.340067 0.065657 0.505050
0.707071 0.084175 0.000000 0.208754
URL http://jaspar.genereg.net/matrix/MA1789.1
MOTIF MA1790.1 NAC073
letter-probability matrix: alength= 4 w= 15 nsites= 1000 E= 0
0.003350 0.984925 0.000000 0.011725
0.005025 0.000000 0.199330 0.795645
0.000000 0.006700 0.001675 0.991625
0.134003 0.452261 0.388610 0.025126
0.319933 0.102178 0.040201 0.537688
0.179229 0.239531 0.189280 0.391960
0.185930 0.396985 0.217755 0.199330
0.244556 0.259631 0.125628 0.370184
0.422111 0.026801 0.046901 0.504187
0.020101 0.586264 0.118928 0.274707
0.984925 0.008375 0.000000 0.006700
0.442211 0.557789 0.000000 0.000000
0.067002 0.000000 0.837521 0.095477
0.080402 0.574540 0.053601 0.291457
0.251256 0.221106 0.003350 0.524288
URL http://jaspar.genereg.net/matrix/MA1790.1
MOTIF MA1791.1 NAC087
letter-probability matrix: alength= 4 w= 19 nsites= 1000 E= 0
0.034783 0.000000 0.000000 0.965217
0.250435 0.015652 0.126957 0.606956
0.373913 0.142609 0.245217 0.238261
0.003478 0.996522 0.000000 0.000000
0.000000 0.000000 0.330435 0.669565
0.008696 0.001739 0.000000 0.989565
0.130435 0.158261 0.693913 0.017391
0.172174 0.135652 0.038261 0.653913
0.231304 0.194783 0.250435 0.323478
0.240000 0.314783 0.163478 0.281739
0.206957 0.307826 0.165217 0.320000
0.566956 0.040000 0.194783 0.198261
0.000000 0.777391 0.010435 0.212174
1.000000 0.000000 0.000000 0.000000
0.278261 0.721739 0.000000 0.000000
0.000000 0.000000 0.980870 0.019130
0.076522 0.283478 0.102609 0.537391
0.398261 0.175652 0.008696 0.417391
0.846957 0.001739 0.003478 0.147826
URL http://jaspar.genereg.net/matrix/MA1791.1
MOTIF MA1792.1 NAC098
letter-probability matrix: alength= 4 w= 16 nsites= 1000 E= 0
0.017212 0.982788 0.000000 0.000000
0.000000 0.000000 0.406196 0.593804
0.000000 0.000000 0.000000 1.000000
0.091222 0.117040 0.781411 0.010327
0.144578 0.142857 0.046472 0.666093
0.216867 0.197935 0.253012 0.332186
0.235800 0.290878 0.180723 0.292599
0.246127 0.278830 0.148021 0.327022
0.535284 0.043029 0.179002 0.242685
0.005164 0.731497 0.024096 0.239243
1.000000 0.000000 0.000000 0.000000
0.318417 0.678141 0.000000 0.003442
0.001721 0.000000 0.981067 0.017212
0.063683 0.247849 0.118761 0.569707
0.351119 0.223752 0.000000 0.425129
0.829604 0.001721 0.005164 0.163511
URL http://jaspar.genereg.net/matrix/MA1792.1
MOTIF MA1796.1 RAP2-7
letter-probability matrix: alength= 4 w= 8 nsites= 1000 E= 0
0.000831 0.000831 0.250000 0.748339
0.614264 0.154141 0.230828 0.000767
0.000712 0.784188 0.214387 0.000712
0.000712 0.000712 0.855413 0.143162
0.690951 0.000767 0.307515 0.000767
0.000767 0.000767 0.921012 0.077454
0.000767 0.000767 0.997699 0.000767
0.272645 0.000906 0.182065 0.544384
URL http://jaspar.genereg.net/matrix/MA1796.1
MOTIF MA1800.1 TEM1
letter-probability matrix: alength= 4 w= 8 nsites= 1000 E= 0
0.219542 0.097710 0.682505 0.000244
0.087833 0.911816 0.000175 0.000175
0.874610 0.015771 0.109463 0.000156
0.999532 0.000156 0.000156 0.000156
0.000156 0.999532 0.000156 0.000156
0.999532 0.000156 0.000156 0.000156
0.000172 0.000172 0.241385 0.758270
0.599650 0.125125 0.000250 0.274975
URL http://jaspar.genereg.net/matrix/MA1800.1
MOTIF MA1818.1 Zm00001d052229
letter-probability matrix: alength= 4 w= 10 nsites= 8956 E= 0
0.108866 0.536065 0.226552 0.128517
0.133207 0.177200 0.581398 0.108196
0.000000 1.000000 0.000000 0.000000
0.000000 1.000000 0.000000 0.000000
0.000000 0.000000 1.000000 0.000000
0.000000 1.000000 0.000000 0.000000
0.000000 1.000000 0.000000 0.000000
0.000000 0.000000 1.000000 0.000000
0.109089 0.563756 0.192050 0.135105
0.102724 0.574140 0.213042 0.110094
URL http://jaspar.genereg.net/matrix/MA1818.1
MOTIF MA1007.1 PHYPADRAFT_173530
letter-probability matrix: alength= 4 w= 8 nsites= 1001 E= 0
0.071928 0.000999 0.285714 0.641359
0.000000 0.000000 1.000000 0.000000
0.050050 0.000000 0.000000 0.949950
0.000000 1.000000 0.000000 0.000000
0.000000 0.000000 1.000000 0.000000
0.000000 0.000000 1.000000 0.000000
0.000000 0.150150 0.000000 0.849850
0.084000 0.001000 0.665000 0.250000
URL http://jaspar.genereg.net/matrix/MA1007.1
MOTIF MA1023.1 PHYPADRAFT_28324
letter-probability matrix: alength= 4 w= 8 nsites= 1001 E= 0
0.071928 0.071928 0.285714 0.570430
0.000000 0.000000 1.000000 0.000000
0.000000 0.000000 0.000000 1.000000
0.000000 1.000000 0.000000 0.000000
0.000000 0.000000 1.000000 0.000000
0.000000 0.000000 1.000000 0.000000
0.000000 0.217217 0.000000 0.782783
0.117882 0.000999 0.704296 0.176823
URL http://jaspar.genereg.net/matrix/MA1023.1
MOTIF MA2381.1 e_gw1.170.52.1
letter-probability matrix: alength= 4 w= 4 nsites= 997 E= 0
0.066199 0.840522 0.021063 0.072217
0.051102 0.028056 0.204409 0.716433
0.061061 0.000000 0.046046 0.892893
0.059178 0.009027 0.042126 0.889669
URL http://jaspar.genereg.net/matrix/MA2381.1
MOTIF MA2382.1 e_gw1.209.40.1
letter-probability matrix: alength= 4 w= 6 nsites= 998 E= 0
0.105210 0.845691 0.012024 0.037074
0.916584 0.007944 0.009930 0.065541
0.020958 0.937126 0.003992 0.037924
0.037924 0.003992 0.937126 0.020958
0.065541 0.009930 0.007944 0.916584
0.037074 0.012024 0.845691 0.105210
URL http://jaspar.genereg.net/matrix/MA2382.1
MOTIF MA2383.1 e_gw1.392.16.1
letter-probability matrix: alength= 4 w= 5 nsites= 997 E= 0
0.004012 0.899699 0.026078 0.070211
0.129259 0.051102 0.146293 0.673347
0.038076 0.000000 0.035070 0.926854
0.064128 0.012024 0.062124 0.861723
0.329659 0.117234 0.070140 0.482966
URL http://jaspar.genereg.net/matrix/MA2383.1
MOTIF MA2384.1 estExt_Genewise1.C_2060077
letter-probability matrix: alength= 4 w= 7 nsites= 998 E= 0
0.046092 0.360721 0.470942 0.122244
1.000000 0.000000 0.000000 0.000000
0.000000 1.000000 0.000000 0.000000
0.000000 0.000000 1.000000 0.000000
0.000000 0.000000 0.000000 1.000000
0.024024 0.024024 0.927928 0.024024
0.041123 0.041123 0.530592 0.387161
URL http://jaspar.genereg.net/matrix/MA2384.1
MOTIF MA2385.1 estExt_gwp_gw1.C_220046
letter-probability matrix: alength= 4 w= 4 nsites= 998 E= 0
0.053106 0.125251 0.760521 0.061122
0.006006 0.948949 0.000000 0.045045
0.045090 0.000000 0.925852 0.029058
0.016032 0.815631 0.092184 0.076152
URL http://jaspar.genereg.net/matrix/MA2385.1
MOTIF MA2386.1 estExt_gwp_gw1.C_550163
letter-probability matrix: alength= 4 w= 7 nsites= 999 E= 0
0.070070 0.789790 0.070070 0.070070
0.923924 0.000000 0.076076 0.000000
0.000000 1.000000 0.000000 0.000000
0.000000 1.000000 0.000000 0.000000
0.000000 0.000000 1.000000 0.000000
1.000000 0.000000 0.000000 0.000000
0.000000 1.000000 0.000000 0.000000
URL http://jaspar.genereg.net/matrix/MA2386.1
MOTIF MA2393.1 PHYPA_008731
letter-probability matrix: alength= 4 w= 7 nsites= 998 E= 0
0.000000 1.000000 0.000000 0.000000
1.000000 0.000000 0.000000 0.000000
0.000000 1.000000 0.000000 0.000000
0.053106 0.000000 0.946894 0.000000
0.000000 0.000000 0.000000 1.000000
0.000000 0.000000 1.000000 0.000000
0.143287 0.642285 0.071142 0.143287
URL http://jaspar.genereg.net/matrix/MA2393.1
MOTIF MA2394.1 PpDof6
letter-probability matrix: alength= 4 w= 4 nsites= 998 E= 0
0.052104 0.860721 0.027054 0.060120
0.086172 0.053106 0.216433 0.644289
0.081162 0.000000 0.062124 0.856713
0.080241 0.023069 0.067202 0.829488
URL http://jaspar.genereg.net/matrix/MA2394.1
MOTIF MA2395.1 PHYPA_011264
letter-probability matrix: alength= 4 w= 8 nsites= 1000 E= 0
0.176643 0.704812 0.000587 0.117958
0.781684 0.000434 0.217448 0.000434
0.000434 0.998698 0.000434 0.000434
0.000434 0.998698 0.000434 0.000434
0.000434 0.000434 0.998698 0.000434
0.998698 0.000434 0.000434 0.000434
0.000434 0.998698 0.000434 0.000434
0.570513 0.285613 0.071937 0.071937
URL http://jaspar.genereg.net/matrix/MA2395.1
MOTIF MA1008.2 PHYPADRAFT_182268
letter-probability matrix: alength= 4 w= 7 nsites= 1000 E= 0
0.000000 0.000000 1.000000 0.000000
0.000000 0.000000 0.000000 1.000000
0.000000 1.000000 0.000000 0.000000
0.000000 0.000000 1.000000 0.000000
0.000000 0.000000 1.000000 0.000000
0.000000 0.076000 0.000000 0.924000
0.070070 0.070070 0.789790 0.070070
URL http://jaspar.genereg.net/matrix/MA1008.2
MOTIF MA1010.2 PHYPADRAFT_64121
letter-probability matrix: alength= 4 w= 8 nsites= 1000 E= 0
0.041000 0.041000 0.041000 0.877000
0.020000 0.020000 0.853000 0.107000
0.107000 0.020000 0.125000 0.748000
0.019980 0.940060 0.019980 0.019980
0.000000 0.087087 0.912913 0.000000
0.087087 0.000000 0.912913 0.000000
0.000000 0.000000 0.000000 1.000000
0.608000 0.070000 0.158000 0.164000
URL http://jaspar.genereg.net/matrix/MA1010.2
MOTIF MA0988.2 PHYPADRAFT_143875
letter-probability matrix: alength= 4 w= 6 nsites= 1000 E= 0
0.106000 0.844000 0.012000 0.038000
0.923924 0.000000 0.010010 0.066066
0.021978 0.939061 0.000000 0.038961
0.038961 0.000000 0.939061 0.021978
0.066066 0.010010 0.000000 0.923924
0.038000 0.012000 0.844000 0.106000
URL http://jaspar.genereg.net/matrix/MA0988.2
MOTIF MA1011.2 PHYPADRAFT_72483
letter-probability matrix: alength= 4 w= 6 nsites= 999 E= 0
0.069069 0.849850 0.017017 0.064064
0.806807 0.000000 0.106106 0.087087
0.054945 0.799201 0.000000 0.145854
0.145854 0.000000 0.799201 0.054945
0.087087 0.106106 0.000000 0.806807
0.064064 0.017017 0.849850 0.069069
URL http://jaspar.genereg.net/matrix/MA1011.2
MOTIF MA1021.2 PHYPADRAFT_48267
letter-probability matrix: alength= 4 w= 7 nsites= 1001 E= 0
0.000999 0.997003 0.000999 0.000999
0.997003 0.000999 0.000999 0.000999
0.000999 0.997003 0.000999 0.000999
0.052947 0.000999 0.945055 0.000999
0.000999 0.000999 0.000999 0.997003
0.000999 0.000999 0.997003 0.000999
0.143000 0.642000 0.072000 0.143000
URL http://jaspar.genereg.net/matrix/MA1021.2
MOTIF MA0987.2 PHYPADRAFT_140773
letter-probability matrix: alength= 4 w= 4 nsites= 1001 E= 0
0.887113 0.042957 0.009990 0.059940
0.892000 0.046000 0.001000 0.061000
0.715000 0.205000 0.028000 0.052000
0.072000 0.022000 0.839000 0.067000
URL http://jaspar.genereg.net/matrix/MA0987.2
MOTIF MA0989.2 PHYPADRAFT_153324
letter-probability matrix: alength= 4 w= 5 nsites= 1001 E= 0
0.481518 0.070929 0.117882 0.329670
0.860140 0.061938 0.012987 0.064935
0.926000 0.036000 0.000000 0.038000
0.672000 0.147000 0.052000 0.129000
0.070929 0.026973 0.897103 0.004995
URL http://jaspar.genereg.net/matrix/MA0989.2
MOTIF MA1022.2 PHYPADRAFT_38837
letter-probability matrix: alength= 4 w= 4 nsites= 1001 E= 0
0.827173 0.067932 0.023976 0.080919
0.855000 0.062000 0.001000 0.082000
0.644000 0.216000 0.054000 0.086000
0.061000 0.027000 0.860000 0.052000
URL http://jaspar.genereg.net/matrix/MA1022.2
MOTIF MA2055.1 PK00315.1
letter-probability matrix: alength= 4 w= 8 nsites= 999 E= 0
0.086086 0.163163 0.664665 0.086086
0.840681 0.159319 0.000000 0.000000
0.000000 0.922923 0.000000 0.077077
0.917918 0.000000 0.082082 0.000000
0.077077 0.000000 0.922923 0.000000
0.077077 0.840841 0.082082 0.000000
0.023046 0.023046 0.106212 0.847695
0.317317 0.064064 0.477477 0.141141
URL http://jaspar.genereg.net/matrix/MA2055.1
MOTIF MA2056.1 PK01144.1
letter-probability matrix: alength= 4 w= 4 nsites= 999 E= 0
0.023023 0.872873 0.004004 0.100100
0.031031 0.000000 0.082082 0.886887
0.043043 0.002002 0.025025 0.929930
0.043043 0.025025 0.022022 0.909910
URL http://jaspar.genereg.net/matrix/MA2056.1
MOTIF MA2057.1 PK01630.1
letter-probability matrix: alength= 4 w= 7 nsites= 998 E= 0
0.166333 0.111222 0.678357 0.044088
0.134269 0.865731 0.000000 0.000000
0.906720 0.014042 0.043129 0.036108
0.000000 0.926927 0.000000 0.073073
0.094188 0.000000 0.905812 0.000000
0.052052 0.067067 0.082082 0.798799
0.008008 0.000000 0.927928 0.064064
URL http://jaspar.genereg.net/matrix/MA2057.1
MOTIF MA2058.1 PK03929.1
letter-probability matrix: alength= 4 w= 5 nsites= 998 E= 0
0.039078 0.909820 0.016032 0.035070
0.034034 0.046046 0.080080 0.839840
0.031062 0.004008 0.022044 0.942886
0.024048 0.010020 0.024048 0.941884
0.349699 0.118236 0.073146 0.458918
URL http://jaspar.genereg.net/matrix/MA2058.1
MOTIF MA2059.1 PK05432.1
letter-probability matrix: alength= 4 w= 6 nsites= 998 E= 0
0.384770 0.103206 0.451904 0.060120
0.004004 0.001001 0.894895 0.100100
0.008016 0.002004 0.002004 0.987976
0.034068 0.964930 0.000000 0.001002
0.726453 0.132265 0.035070 0.106212
0.622623 0.047047 0.201201 0.129129
URL http://jaspar.genereg.net/matrix/MA2059.1
MOTIF MA2060.1 PK05451.1
letter-probability matrix: alength= 4 w= 8 nsites= 998 E= 0
0.083166 0.583166 0.083166 0.250501
0.000000 1.000000 0.000000 0.000000
1.000000 0.000000 0.000000 0.000000
0.000000 1.000000 0.000000 0.000000
0.000000 0.000000 1.000000 0.000000
0.000000 0.000000 0.000000 1.000000
0.000000 0.000000 1.000000 0.000000
0.285858 0.571715 0.071214 0.071214
URL http://jaspar.genereg.net/matrix/MA2060.1
MOTIF MA2061.1 PK06517.1
letter-probability matrix: alength= 4 w= 7 nsites= 997 E= 0
0.000000 1.000000 0.000000 0.000000
1.000000 0.000000 0.000000 0.000000
0.000000 1.000000 0.000000 0.000000
0.000000 0.000000 1.000000 0.000000
0.000000 0.000000 0.000000 1.000000
0.000000 0.000000 1.000000 0.000000
0.125251 0.748497 0.125251 0.001002
URL http://jaspar.genereg.net/matrix/MA2061.1
MOTIF MA2062.1 PK07031.1
letter-probability matrix: alength= 4 w= 4 nsites= 998 E= 0
0.058116 0.817635 0.017034 0.107214
0.050100 0.017034 0.243487 0.689379
0.074148 0.000000 0.065130 0.860721
0.073146 0.021042 0.044088 0.861723
URL http://jaspar.genereg.net/matrix/MA2062.1
MOTIF MA2063.1 PK07402.1
letter-probability matrix: alength= 4 w= 6 nsites= 999 E= 0
0.608609 0.002002 0.384384 0.005005
0.000000 0.993994 0.005005 0.001001
0.000000 0.995992 0.000000 0.004008
0.010020 0.001002 0.978958 0.010020
0.441884 0.411824 0.042084 0.104208
0.075150 0.791583 0.031062 0.102204
URL http://jaspar.genereg.net/matrix/MA2063.1
MOTIF MA2064.1 PK07858.1
letter-probability matrix: alength= 4 w= 7 nsites= 998 E= 0
0.000000 1.000000 0.000000 0.000000
1.000000 0.000000 0.000000 0.000000
0.000000 1.000000 0.000000 0.000000
0.000000 0.000000 1.000000 0.000000
0.000000 0.000000 0.000000 1.000000
0.000000 0.000000 1.000000 0.000000
0.067067 0.532533 0.200200 0.200200
URL http://jaspar.genereg.net/matrix/MA2064.1
MOTIF MA2065.1 PK08602.1
letter-probability matrix: alength= 4 w= 8 nsites= 999 E= 0
0.096096 0.621622 0.096096 0.186186
0.000000 1.000000 0.000000 0.000000
1.000000 0.000000 0.000000 0.000000
0.000000 1.000000 0.000000 0.000000
0.000000 1.000000 0.000000 0.000000
0.000000 0.000000 1.000000 0.000000
0.000000 1.000000 0.000000 0.000000
0.134269 0.575150 0.049098 0.241483
URL http://jaspar.genereg.net/matrix/MA2065.1
MOTIF MA2066.1 PK09021.1
letter-probability matrix: alength= 4 w= 8 nsites= 999 E= 0
0.000000 0.000000 0.000000 1.000000
0.000000 0.000000 1.000000 0.000000
1.000000 0.000000 0.000000 0.000000
0.000000 1.000000 0.000000 0.000000
0.000000 0.000000 1.000000 0.000000
0.000000 0.000000 0.000000 1.000000
0.265531 0.670341 0.032064 0.032064
0.712425 0.071142 0.109218 0.107214
URL http://jaspar.genereg.net/matrix/MA2066.1
MOTIF MA2067.1 PK09702.1
letter-probability matrix: alength= 4 w= 8 nsites= 998 E= 0
0.001002 0.125251 0.872745 0.001002
0.000000 1.000000 0.000000 0.000000
1.000000 0.000000 0.000000 0.000000
0.000000 1.000000 0.000000 0.000000
0.000000 0.000000 1.000000 0.000000
0.000000 0.000000 0.000000 1.000000
0.000000 0.000000 1.000000 0.000000
0.332665 0.167335 0.498998 0.001002
URL http://jaspar.genereg.net/matrix/MA2067.1
MOTIF MA2068.1 PK10344.1
letter-probability matrix: alength= 4 w= 8 nsites= 998 E= 0
0.091182 0.000000 0.726453 0.182365
0.000000 0.000000 1.000000 0.000000
0.000000 0.000000 1.000000 0.000000
0.856713 0.143287 0.000000 0.000000
0.000000 1.000000 0.000000 0.000000
0.000000 1.000000 0.000000 0.000000
1.000000 0.000000 0.000000 0.000000
0.001002 0.872745 0.001002 0.125251
URL http://jaspar.genereg.net/matrix/MA2068.1
MOTIF MA2069.1 PK10955.1
letter-probability matrix: alength= 4 w= 5 nsites= 999 E= 0
0.009009 0.970971 0.003003 0.017017
0.008024 0.089268 0.043129 0.859579
0.007014 0.000000 0.003006 0.989980
0.007014 0.004008 0.008016 0.980962
0.308617 0.059118 0.016032 0.616232
URL http://jaspar.genereg.net/matrix/MA2069.1
MOTIF MA2070.1 PK15337.1
letter-probability matrix: alength= 4 w= 4 nsites= 998 E= 0
0.069138 0.770541 0.033066 0.127255
0.051051 0.001001 0.159159 0.788789
0.067134 0.006012 0.039078 0.887776
0.073220 0.039117 0.043129 0.844534
URL http://jaspar.genereg.net/matrix/MA2070.1
MOTIF MA2071.1 PK15505.1
letter-probability matrix: alength= 4 w= 8 nsites= 997 E= 0
0.190572 0.120361 0.629890 0.059178
0.000000 1.000000 0.000000 0.000000
1.000000 0.000000 0.000000 0.000000
0.000000 1.000000 0.000000 0.000000
0.000000 0.000000 1.000000 0.000000
0.000000 0.000000 0.000000 1.000000
0.000000 0.000000 1.000000 0.000000
0.076152 0.255511 0.137275 0.531062
URL http://jaspar.genereg.net/matrix/MA2071.1
MOTIF MA2072.1 PK16335.1
letter-probability matrix: alength= 4 w= 8 nsites= 997 E= 0
0.099298 0.099298 0.615848 0.185557
0.772773 0.227227 0.000000 0.000000
0.064064 0.935936 0.000000 0.000000
1.000000 0.000000 0.000000 0.000000
0.016016 0.016016 0.951952 0.016016
0.016016 0.951952 0.016016 0.016016
0.016016 0.016016 0.016016 0.951952
0.167335 0.091182 0.650301 0.091182
URL http://jaspar.genereg.net/matrix/MA2072.1
MOTIF MA2073.1 PK16340.1
letter-probability matrix: alength= 4 w= 4 nsites= 998 E= 0
0.067134 0.813627 0.073146 0.046092
0.050100 0.000000 0.329659 0.620240
0.068136 0.000000 0.040080 0.891784
0.077232 0.010030 0.057172 0.855567
URL http://jaspar.genereg.net/matrix/MA2073.1
MOTIF MA2074.1 PK17878.1
letter-probability matrix: alength= 4 w= 8 nsites= 998 E= 0
0.080160 0.879760 0.000000 0.040080
0.000000 0.000000 1.000000 0.000000
0.000000 0.966934 0.033066 0.000000
0.000000 1.000000 0.000000 0.000000
0.000000 0.000000 1.000000 0.000000
0.066132 0.633267 0.100200 0.200401
0.138277 0.827655 0.000000 0.034068
0.649650 0.050050 0.250250 0.050050
URL http://jaspar.genereg.net/matrix/MA2074.1
MOTIF MA2075.1 PK18009.1
letter-probability matrix: alength= 4 w= 7 nsites= 998 E= 0
0.750501 0.137275 0.000000 0.112224
0.056056 0.831832 0.056056 0.056056
1.000000 0.000000 0.000000 0.000000
0.112112 0.887888 0.000000 0.000000
0.056056 0.000000 0.887888 0.056056
0.000000 0.000000 0.000000 1.000000
0.185185 0.017017 0.780781 0.017017
URL http://jaspar.genereg.net/matrix/MA2075.1
MOTIF MA2076.1 PK18401.1
letter-probability matrix: alength= 4 w= 8 nsites= 997 E= 0
0.224674 0.194584 0.531595 0.049147
0.000000 0.932933 0.000000 0.067067
1.000000 0.000000 0.000000 0.000000
0.067067 0.932933 0.000000 0.000000
0.000000 0.000000 0.932933 0.067067
0.016048 0.016048 0.016048 0.951856
0.016048 0.016048 0.951856 0.016048
0.069138 0.147295 0.594188 0.189379
URL http://jaspar.genereg.net/matrix/MA2076.1
MOTIF MA2077.1 PK18474.1
letter-probability matrix: alength= 4 w= 7 nsites= 999 E= 0
0.000000 1.000000 0.000000 0.000000
1.000000 0.000000 0.000000 0.000000
0.000000 1.000000 0.000000 0.000000
0.000000 0.000000 1.000000 0.000000
0.000000 0.000000 0.000000 1.000000
0.000000 0.000000 1.000000 0.000000
0.039078 0.744489 0.096192 0.120240
URL http://jaspar.genereg.net/matrix/MA2077.1
MOTIF MA2078.1 PK19363.1
letter-probability matrix: alength= 4 w= 8 nsites= 999 E= 0
0.150150 0.716717 0.075075 0.058058
0.025075 0.012036 0.950853 0.012036
0.018036 0.875752 0.106212 0.000000
0.018036 0.975952 0.006012 0.000000
0.000000 0.006006 0.993994 0.000000
0.058116 0.628257 0.137275 0.176353
0.157315 0.775551 0.007014 0.060120
0.489468 0.066199 0.299900 0.144433
URL http://jaspar.genereg.net/matrix/MA2078.1
MOTIF MA2079.1 PK19717.1
letter-probability matrix: alength= 4 w= 9 nsites= 999 E= 0
0.100100 0.115115 0.712713 0.072072
0.006012 0.008016 0.956914 0.029058
0.049098 0.034068 0.894790 0.022044
0.116116 0.401401 0.401401 0.081081
0.023046 0.930862 0.002004 0.044088
0.008016 0.983968 0.004008 0.004008
0.021021 0.930931 0.002002 0.046046
0.554108 0.313627 0.072144 0.060120
0.000000 0.883768 0.036072 0.080160
URL http://jaspar.genereg.net/matrix/MA2079.1
MOTIF MA2080.1 PK20225.1
letter-probability matrix: alength= 4 w= 6 nsites= 998 E= 0
0.135271 0.789579 0.033066 0.042084
0.758517 0.098196 0.070140 0.073146
0.004008 0.820641 0.047094 0.128257
0.080160 0.000000 0.898798 0.021042
0.046092 0.029058 0.000000 0.924850
0.014028 0.000000 0.985972 0.000000
URL http://jaspar.genereg.net/matrix/MA2080.1
MOTIF MA2081.1 PK20317.1
letter-probability matrix: alength= 4 w= 5 nsites= 998 E= 0
0.062124 0.869739 0.037074 0.031062
0.022044 0.000000 0.330661 0.647295
0.045090 0.000000 0.055110 0.899800
0.053159 0.000000 0.060181 0.886660
0.340681 0.100200 0.081162 0.477956
URL http://jaspar.genereg.net/matrix/MA2081.1
MOTIF MA2082.1 PK20392.1
letter-probability matrix: alength= 4 w= 6 nsites= 999 E= 0
0.776777 0.073073 0.080080 0.070070
0.946894 0.027054 0.004008 0.022044
0.013039 0.014042 0.002006 0.970913
0.478958 0.330661 0.066132 0.124248
0.974950 0.005010 0.009018 0.011022
0.063126 0.030060 0.047094 0.859719
URL http://jaspar.genereg.net/matrix/MA2082.1
MOTIF MA2083.1 PK21166.1
letter-probability matrix: alength= 4 w= 8 nsites= 999 E= 0
0.150150 0.483483 0.050050 0.316316
1.000000 0.000000 0.000000 0.000000
0.123246 0.846693 0.010020 0.020040
0.000000 0.979980 0.000000 0.020020
0.282565 0.070140 0.000000 0.647295
1.000000 0.000000 0.000000 0.000000
0.260260 0.739740 0.000000 0.000000
0.054108 0.617234 0.013026 0.315631
URL http://jaspar.genereg.net/matrix/MA2083.1
MOTIF MA2084.1 PK23009.1
letter-probability matrix: alength= 4 w= 5 nsites= 998 E= 0
0.024048 0.891784 0.005010 0.079158
0.029058 0.104208 0.054108 0.812625
0.052104 0.000000 0.019038 0.928858
0.039039 0.012012 0.018018 0.930931
0.338338 0.073073 0.025025 0.563564
URL http://jaspar.genereg.net/matrix/MA2084.1
MOTIF MA2085.1 PK23763.1
letter-probability matrix: alength= 4 w= 5 nsites= 998 E= 0
0.026052 0.934870 0.013026 0.026052
0.035105 0.052156 0.071214 0.841525
0.030060 0.006012 0.021042 0.942886
0.022044 0.008016 0.024048 0.945892
0.366366 0.091091 0.053053 0.489489
URL http://jaspar.genereg.net/matrix/MA2085.1
MOTIF MA2086.1 PK23964.1
letter-probability matrix: alength= 4 w= 7 nsites= 998 E= 0
0.045090 0.047094 0.541082 0.366733
0.268537 0.717435 0.014028 0.000000
0.016032 0.943888 0.001002 0.039078
0.961924 0.000000 0.037074 0.001002
0.052104 0.788577 0.100200 0.059118
0.088176 0.064128 0.832665 0.015030
0.050050 0.049049 0.027027 0.873874
URL http://jaspar.genereg.net/matrix/MA2086.1
MOTIF MA2087.1 PK24205.1
letter-probability matrix: alength= 4 w= 8 nsites= 997 E= 0
0.086259 0.673019 0.154463 0.086259
1.000000 0.000000 0.000000 0.000000
[truncated: 8,121 more rows]

## Sheet: Pt_network
Module	Motif	MotifPvalue	MotifEffectSize	locus_name	full_name	symbol_all	Node	Type	Importance	Gene	Correlation	ExpressionPvalue	Score
Module11	BRN2	1.39137e-09	1.70214	AT4G10350	NAC domain containing protein 70	ANAC070-BRN2-NAC070	BRN2	TFModule	4	Potra2n2c4785	0.931689	4.20987e-10	0.400961
Module11	NAC010	8.1914e-08	1.56013	AT1G28470	NAC domain containing protein 10	ANAC010-NAC010-SND3	SND3	TFModule	4	Potra2n7c15489	0.958575	3.49045e-12	0.392056
Module11	MYB83	5.36735e-08	1.38074	AT3G08500	myb domain protein 83	AtMYB83-MYB83	MYB83	TFModule	4	Potra2n1c2305	0.88637	7.46511e-08	0.250199
Module4	MYB61	2.56885e-06	1.38352	AT1G09540	ARABIDOPSIS THALIANA MYB DOMAIN PROTEIN 61	ATMYB61-MYB61	MYB61	TFModule	3	Potra2n10c22314	0.926807	6.05848e-10	0.248819
Module4	NAC105	0.000136284	1.22063	AT5G66300	Arabidopsis NAC domain containing protein 105	ANAC105-NAC105-VND3	VND3	TFModule	4	Potra2n7c16511	0.964379	6.33045e-13	0.227695
Module4	MYB4	9.01969e-07	1.3858	AT4G38620	myb domain protein 4	ATMYB4-MYB4	MYB4	TFModule	3	Potra2n19c34420	0.89212	3.02137e-08	0.219493
Module4	MYB43	3.66221e-05	1.30453	AT5G16600	myb domain protein 43	AtMYB43-MYB43	MYB43	TFModule	3	Potra2n17c30794	0.941845	7.94833e-11	0.216351
Module4	NAC007	0.000464993	1.21505	AT1G12260	NAC 007	ANAC007-EMB2749-NAC007-VND4	VND4	TFModule	4	Potra2n7c16511	0.964379	6.33045e-13	0.196299
Module4	NAC037	0.000464993	1.21505	AT2G18060	Arabidopsis NAC domain containing protein 37	ANAC037-VND1	VND1	TFModule	4	Potra2n7c16511	0.964379	6.33045e-13	0.196299
Module4	NAC076	0.000464993	1.21505	AT4G36160	NAC domain containing protein 76	ANAC076-NAC076-VND2	VND2	TFModule	4	Potra2n7c16511	0.964379	6.33045e-13	0.196299
Module4	NAC101	0.000464993	1.21505	AT5G62380	NAC-domain protein 101	ANAC101-NAC101-VND6	VND6	TFModule	4	Potra2n7c16511	0.964379	6.33045e-13	0.196299
Module11	NAC105	2.56444e-05	1.29296	AT5G66300	Arabidopsis NAC domain containing protein 105	ANAC105-NAC105-VND3	VND3	TFModule	4	Potra2n7c16511	0.921951	1.40449e-09	0.196248
Module7	GATA10	8.53839e-07	1.47719	AT1G08000	GATA transcription factor 10	GATA10	GATA10	TFModule	1	Potra2n4c10270	0.869729	3.30202e-07	0.189924
Module4	MYB83	1.81732e-07	1.29987	AT3G08500	myb domain protein 83	AtMYB83-MYB83	MYB83	TFModule	4	Potra2n1c2250	0.831201	1.65939e-06	0.188131
Module4	MYB99	0.000134368	1.3512	AT5G62320	myb domain protein 99	ATMYB99-ATMYBCU15-MYB99	MYB99	TFModule	2	Potra2n12c24760	0.936383	1.70627e-10	0.182616
Module11	MYB61	2.45279e-07	1.50623	AT1G09540	ARABIDOPSIS THALIANA MYB DOMAIN PROTEIN 61	ATMYB61-MYB61	MYB61	TFModule	3	Potra2n10c22314	0.834097	1.91004e-06	0.182546
Module11	ZHD10	8.0989e-06	1.49201	AT5G39760	homeobox protein 23	AtHB23-HB23-ZHD10	ZHD10	TFModule	1	Potra2n368s35432	0.880623	1.18389e-07	0.170298
Module7	SBP8	0.0071453	1.26952	AT2G42200	NA	AtSPL9-SPL9	SBP8	TFModule	1	Potra2n7c15463	0.97998	1.2671e-15	0.15437
Module7	BZIP18	0.000916499	1.2736	AT2G40620	NA	NA	BZIP18	TFModule	1	Potra2n13c24971	0.947382	4.52349e-11	0.151744
Module7	VIP1	0.000954692	1.26996	AT1G43700	sulphate utilization efficiency 3	SUE3-VIP1	VIP1	TFModule	1	Potra2n13c24971	0.947382	4.52349e-11	0.150858
Module3	OsTRBF3	9.2839e-08	1.50146	AT1G72740	NA	NA	OsTRBF3	TFModule	1	Potra2n18c32697	0.749234	4.37012e-05	0.148035
Module3	P0510F09.23	9.2839e-08	1.50146	AT1G72740	NA	NA	P0510F09.23	TFModule	1	Potra2n18c32697	0.749234	4.37012e-05	0.148035
Module11	NAC073	0.00224842	1.26725	AT4G28500	NAC domain containing protein 73	ANAC073-NAC073-SND2	SND2	TFModule	4	Potra2n7c15489	0.958575	3.49045e-12	0.146503
Module11	BPC5	5.37665e-08	1.25831	AT4G38910	NA	ATBPC5-BBR/BPC5-BPC5	BPC5	TFModule	1	Potra2n10c21556	0.759734	6.86774e-05	0.146138
Module11	SVP	0.000100052	1.24416	AT2G22540	AGAMOUS-like 22	AGL22-FAQ1-SVP	SVP	TFModule	1	Potra2n7c16552	0.895454	3.25914e-08	0.1446
Module11	SGR5	2.70644e-05	1.22988	AT2G01940	ARABIDOPSIS THALIANA INDETERMINATE(ID)-DOMAIN 15	ATIDD15-SGR5	SGR5	TFModule	3	Potra2n15c28920	0.865991	3.29777e-07	0.14296
Module4	MYB3	0.000167899	1.41755	AT1G22640	ARABIDOPSIS THALIANA MYB DOMAIN PROTEIN 3	ATMYB3-MYB3	MYB3	TFModule	2	Potra2n19c34420	0.89212	3.02137e-08	0.137072
Module11	MYB46	0.000127842	1.44021	AT5G12870	MYB DOMAIN PROTEIN 46	ATMYB46-MYB46	MYB46	TFModule	4	Potra2n1c2305	0.88637	7.46511e-08	0.133985
Module11	ERF104	0.00266754	1.28229	AT5G61600	ethylene response factor 104	ERF104	ERF104	TFModule	1	Potra2n1c644	0.947944	2.91579e-11	0.130938
Module11	NAC075	0.000124435	1.36218	AT4G29230	NAC domain containing protein 75	anac075-NAC075	NAC075	TFModule	2	Potra2n6c13965	0.880857	1.18389e-07	0.130613
Module4	AT1G19000	0.00191865	1.23829	AT1G19000	NA	NA	AT1G19000	TFModule	1	Potra2n10c22092	0.936017	1.70627e-10	0.128152
Module11	SMB	0.00165297	1.23039	AT1G79580	Arabidopsis NAC domain containing protein 33	ANAC033-SMB-URP7	SMB	TFModule	1	Potra2n2c4785	0.931689	4.20987e-10	0.125937
Module11	HRS1	0.0139623	1.20575	AT1G13300	HYPERSENSITIVITY TO LOW PI-ELICITED PRIMARY ROOT SHORTENING 1	HRS1	HRS1	TFModule	1	Potra2n8c17705	0.976298	1.4459e-14	0.12397
Module11	PHL1	0.00608294	1.29802	AT5G29000	PHR1-like 1	PHL1	PHL1	TFModule	1	Potra2n2c4080	0.95965	3.49045e-12	0.12259
Module4	RVE5	0.000133428	1.26606	AT4G01280	NA	NA	RVE5	TFModule	1	Potra2n4c9074	0.855045	4.21707e-07	0.119277
Module4	RAP2-12	0.00586512	1.28178	AT1G53910	related to AP2 12	RAP2.12	RAP2-12	TFModule	1	Potra2n3c7897	0.952898	8.67201e-12	0.119207
Module11	NAC007	0.00165297	1.23039	AT1G12260	NAC 007	ANAC007-EMB2749-NAC007-VND4	VND4	TFModule	4	Potra2n7c16511	0.921951	1.40449e-09	0.118909
Module11	NAC037	0.00165297	1.23039	AT2G18060	Arabidopsis NAC domain containing protein 37	ANAC037-VND1	VND1	TFModule	4	Potra2n7c16511	0.921951	1.40449e-09	0.118909
Module11	NAC076	0.00165297	1.23039	AT4G36160	NAC domain containing protein 76	ANAC076-NAC076-VND2	VND2	TFModule	4	Potra2n7c16511	0.921951	1.40449e-09	0.118909
Module11	NAC101	0.00165297	1.23039	AT5G62380	NAC-domain protein 101	ANAC101-NAC101-VND6	VND6	TFModule	4	Potra2n7c16511	0.921951	1.40449e-09	0.118909
Module4	NAC073	0.00369468	1.21032	AT4G28500	NAC domain containing protein 73	ANAC073-NAC073-SND2	SND2	TFModule	4	Potra2n17c31797	0.941062	8.07858e-11	0.118543
Module4	MYB55	0.0023865	1.33498	AT4G01680	myb domain protein 55	AtMYB55-MYB55	MYB55	TFModule	2	Potra2n10c22314	0.926807	6.05848e-10	0.116714
Module7	GATA11	0.000214608	1.37904	AT1G08010	GATA transcription factor 11	GATA11	GATA11	TFModule	1	Potra2n4c10270	0.869729	3.30202e-07	0.114805
Module6	EIL4	0.0136138	1.18222	AT3G20770	NA	AtEIN3-EIN3	EIL4	TFModule	1	Potra2n9c18729	0.962152	4.40116e-13	0.111338
Module11	HHO2	0.0225915	1.19942	AT1G68670	NA	NA	HHO2	TFModule	1	Potra2n8c17705	0.976298	1.4459e-14	0.110004
Module11	ERF5	0.00724628	1.228	AT5G47230	ETHYLENE RESPONSIVE ELEMENT BINDING FACTOR- 5	ATERF-5-ATERF5-AtMACD1-ERF102-ERF5	ERF5	TFModule	1	Potra2n1c644	0.947944	2.91579e-11	0.10886
Module11	ERF105	0.00750606	1.27919	AT5G51190	NA	NA	ERF105	TFModule	1	Potra2n1c644	0.947944	2.91579e-11	0.108082
Module6	PHL4	0.0187481	1.33622	AT2G20400	NA	NA	PHL4	TFModule	1	Potra2n13c25861	0.960272	6.92273e-13	0.101405
Module4	MYB46	0.000318219	1.34446	AT5G12870	MYB DOMAIN PROTEIN 46	ATMYB46-MYB46	MYB46	TFModule	4	Potra2n1c2250	0.831201	1.65939e-06	0.0976098
Module4	AT1G74840	0.00861535	1.21655	AT1G74840	NA	NA	AT1G74840	TFModule	1	Potra2n10c22092	0.936017	1.70627e-10	0.0973864
Module11	ARF18	0.000589836	1.37686	AT5G37020	auxin response factor 8	ARF8-ATARF8	ARF18	TFModule	1	Potra2n1c3166	0.857311	5.9645e-07	0.097059
Module4	RVE6	0.000716551	1.23855	AT5G52660	NA	NA	RVE6	TFModule	1	Potra2n4c9074	0.855045	4.21707e-07	0.0968051
Module7	SPL9	0.0454359	1.41744	AT2G42200	NA	AtSPL9-SPL9	SPL9	TFModule	1	Potra2n7c15463	0.97998	1.2671e-15	0.0965792
Module11	ARF16	0.00062114	1.22471	AT1G30330	auxin response factor 6	ARF6	ARF16	TFModule	1	Potra2n1c3166	0.857311	5.9645e-07	0.096384
Module11	ERF6	0.0129609	1.46334	AT4G17490	ethylene responsive element binding factor 6	ATERF6-ERF-6-6-ERF6	ERF6	TFModule	1	Potra2n1c644	0.947944	2.91579e-11	0.0960136
Module23	NAC050	0.000840797	1.54597	AT3G10480	NAC domain containing protein 50	ANAC050-NAC050	NAC050	TFModule	3	Potra2n8c16892	0.861518	3.47489e-07	0.0959158
Module23	NAC053	0.000840797	1.38106	AT3G10500	NAC domain containing protein 53	ANAC053-NAC053-NTL4	NAC053	TFModule	2	Potra2n8c16892	0.861518	3.47489e-07	0.0959158
Module23	NAC078	0.000840797	1.38106	AT5G04410	Arabidopsis NAC domain containing protein 78	anac078-NAC2	NAC078	TFModule	2	Potra2n8c16892	0.861518	3.47489e-07	0.0959158
Module11	HHO3	0.0380152	1.17078	AT1G25550	NA	NA	HHO3	TFModule	1	Potra2n8c17705	0.976298	1.4459e-14	0.0948998
Module11	SBP6	4.17284e-05	1.43919	AT2G42200	NA	AtSPL9-SPL9	SBP6	TFModule	1	Potra2n7c15463	0.777598	3.37088e-05	0.094578
Module4	SOC1	0.00267652	1.14818	AT2G45660	AGAMOUS-like 20	AGL20-ATSOC1-SOC1	SOC1	TFModule	1	Potra2n12c24811	0.892687	3.02137e-08	0.0934075
Module6	PHL7	0.0256952	1.23373	AT2G01060	NA	NA	PHL7	TFModule	1	Potra2n6c15386	0.959416	8.42609e-13	0.0927117
Module6	HSFA4A	0.0262655	1.18867	AT4G18880	ARABIDOPSIS THALIANA HEAT SHOCK TRANSCRIPTION FACTOR A4A	AT-HSFA4A-HSF A4A	HSFA4A	TFModule	1	Potra2n4c8980	0.958675	9.07676e-13	0.0919093
Module4	RVE4	0.00105804	1.22779	AT5G02840	LHY/CCA1-like 1	LCL1	RVE4	TFModule	1	Potra2n4c9074	0.855045	4.21707e-07	0.0915949
Module4	GAF1	0.000401723	1.14912	AT3G50700	indeterminate(ID)-domain 2	AtIDD2-IDD2	GAF1	TFModule	1	Potra2n5c11684	0.821271	2.80427e-06	0.0910485
Module9	DOF3.4	0.00574432	1.11734	AT3G50410	OBF binding protein 1	OBP1	DOF3.4	TFModule	4	Potra2n7c16311	0.909713	4.6613e-09	0.0901469
Module4	ERF9	0.00206139	1.2213	AT5G44210	ERF DOMAIN PROTEIN- 9	ATERF-9-ATERF9-ERF9	ERF9	TFModule	1	Potra2n17c31814	0.87396	1.13138e-07	0.090089
Module6	MYB80	0.0280066	1.18443	AT5G56110	myb domain protein 103	AtMYB103-ATMYB80-MS188-MYB103-MYB80	MYB80	TFModule	2	Potra2n1c3996	0.958077	9.98796e-13	0.0899769
Module9	DOF5.4	0.00581867	1.23298	AT5G60850	OBF binding protein 4	OBP4	DOF5.4	TFModule	1	Potra2n7c16311	0.909713	4.6613e-09	0.0899222
Module12	NAC007	0.0121825	1.19448	AT1G12260	NAC 007	ANAC007-EMB2749-NAC007-VND4	VND4	TFModule	4	Potra2n3c7486	0.940115	2.57583e-10	0.0886362
Module12	NAC037	0.0121825	1.19448	AT2G18060	Arabidopsis NAC domain containing protein 37	ANAC037-VND1	VND1	TFModule	4	Potra2n3c7486	0.940115	2.57583e-10	0.0886362
Module12	NAC076	0.0121825	1.19448	AT4G36160	NAC domain containing protein 76	ANAC076-NAC076-VND2	VND2	TFModule	4	Potra2n3c7486	0.940115	2.57583e-10	0.0886362
Module12	NAC101	0.0121825	1.19448	AT5G62380	NAC-domain protein 101	ANAC101-NAC101-VND6	VND6	TFModule	4	Potra2n3c7486	0.940115	2.57583e-10	0.0886362
Module5	PC-MYB1	0.000148841	1.60417	AT4G32730	NA	ATMYB3R-1-ATMYB3R1-MYB3R-1-MYB3R1-PC-MYB1	PC-MYB1	TFModule	3	Potra2n18c32912	0.774684	1.71057e-05	0.0880956
Module11	BPC1	4.17284e-05	1.1653	AT2G01930	BASIC PENTACYSTEINE1	ATBPC1-BBR-BPC1	BPC1	TFModule	1	Potra2n10c21556	0.759734	6.86774e-05	0.0880419
Module7	SGR5	8.55663e-05	1.1943	AT2G01940	ARABIDOPSIS THALIANA INDETERMINATE(ID)-DOMAIN 15	ATIDD15-SGR5	SGR5	TFModule	3	Potra2n12c24052	0.785589	3.48846e-05	0.0875506
Module10	BZR2	0.00173878	1.47479	AT1G19350	BRI1-EMS-SUPPRESSOR 1	BES1-BZR2	BZR2	TFModule	1	Potra2n2c5198	0.85255	2.70763e-07	0.0875179
Module5	MYB3R5	0.000193033	1.51107	AT5G02320	ARABIDOPSIS THALIANA MYB DOMAIN PROTEIN 3R5	ATMYB3R5-MYB3R-5	MYB3R5	TFModule	4	Potra2n3c7379	0.778347	1.47227e-05	0.0866653
Module4	OsbZIP42	0.0011983	1.28334	AT3G56850	ABA-responsive element binding protein 3	AREB3-DPBF3	OsbZIP42	TFModule	1	Potra2n10c20174	0.844945	8.15907e-07	0.0858872
Module23	RVE4	0.0148216	1.38526	AT5G02840	LHY/CCA1-like 1	LCL1	RVE4	TFModule	1	Potra2n14c27038	0.937646	2.42948e-10	0.0849175
Module11	NAC066	0.0134332	1.29543	AT3G61910	NA	NA	NST2	TFModule	4	Potra2n2c4785	0.931689	4.20987e-10	0.0847425
Module23	NAC066	0.00739711	1.67972	AT3G61910	NA	NA	NST2	TFModule	4	Potra2n14c27178	0.912136	5.81233e-09	0.0847424
Module23	HAT22	0.00992928	1.41773	AT4G37790	NA	HAT22	HAT22	TFModule	1	Potra2n7c16575	0.924075	1.82176e-09	0.0845314
Module11	MYB43	9.49424e-06	1.39175	AT5G16600	myb domain protein 43	AtMYB43-MYB43	MYB43	TFModule	3	Potra2n17c30794	0.715521	0.000333437	0.0843254
Module23	RVE8	0.0156877	1.39572	AT3G09600	LHY-CCA1-LIKE5	LCL5-RVE8	RVE8	TFModule	1	Potra2n14c27038	0.937646	2.42948e-10	0.0837724
Module6	HSFB3	0.0373105	1.16287	AT2G41690	heat shock transcription factor B3	AT-HSFB3-HSFB3-HSFB3	HSFB3	TFModule	1	Potra2n6c14973	0.959071	8.88639e-13	0.0831084
Module4	RVE8	0.00199969	1.22365	AT3G09600	LHY-CCA1-LIKE5	LCL5-RVE8	RVE8	TFModule	1	Potra2n4c9074	0.855045	4.21707e-07	0.0830846
Module4	BZIP69	0.00552211	1.22027	AT1G06070	NA	NA	BZIP69	TFModule	1	Potra2n17c31613	0.893874	2.76144e-08	0.0824124
Module4	ERF073	0.0296275	1.19827	AT1G72360	NA	AtERF73-ERF73-HRE1	ERF073	TFModule	1	Potra2n3c7897	0.952898	8.67201e-12	0.081634
Module6	RVE6	0.0227429	1.17943	AT5G52660	NA	NA	RVE6	TFModule	1	Potra2n14c27038	0.93505	7.2334e-11	0.0804593
Module11	BPC6	0.000100052	1.17758	AT5G42520	ARABIDOPSIS THALIANA BASIC PENTACYSTEINE 6	ATBPC6-BBR/BPC6-BPC6	BPC6	TFModule	1	Potra2n10c21556	0.759734	6.86774e-05	0.0804069
Module23	BRN2	0.00992928	1.54861	AT4G10350	NAC domain containing protein 70	ANAC070-BRN2-NAC070	BRN2	TFModule	4	Potra2n14c27178	0.912136	5.81233e-09	0.0796579
Module11	PHL4	0.03789	1.28196	AT2G20400	NA	NA	PHL4	TFModule	1	Potra2n2c4080	0.95965	3.49045e-12	0.0786406
Module6	TGA9	0.0445914	1.2357	AT1G08320	NA	bZIP21-TGA9	TGA9	TFModule	1	Potra2n9c18685	0.958564	9.07676e-13	0.0785431
Module11	ERF076	0.00232232	1.32811	AT1G28370	ERF DOMAIN PROTEIN 11	ATERF11-ERF11	ERF076	TFModule	1	Potra2n17c31814	0.851934	7.29949e-07	0.0780542
Module6	RVE4	0.0256952	1.17351	AT5G02840	LHY/CCA1-like 1	LCL1	RVE4	TFModule	1	Potra2n14c27038	0.93505	7.2334e-11	0.0778638
Module12	NAC105	0.0224647	1.16467	AT5G66300	Arabidopsis NAC domain containing protein 105	ANAC105-NAC105-VND3	VND3	TFModule	4	Potra2n3c7486	0.940115	2.57583e-10	0.0763305
Module23	RVE5	0.0227314	1.34284	AT4G01280	NA	NA	RVE5	TFModule	1	Potra2n14c27038	0.937646	2.42948e-10	0.0762948
Module23	EIL3	0.00341846	1.63527	AT1G73730	NA	AtEIL3-ATSLIM-EIL3-SLIM1	EIL3	TFModule	1	Potra2n9c18729	0.856618	4.47126e-07	0.0756135
Module4	NAC010	0.0281326	1.16667	AT1G28470	NAC domain containing protein 10	ANAC010-NAC010-SND3	SND3	TFModule	4	Potra2n17c31797	0.941062	8.07858e-11	0.0755773
Module7	BZIP52	0.0317	1.16958	AT1G06850	basic leucine-zipper 52	AtbZIP52-bZIP52	BZIP52	TFModule	1	Potra2n13c24971	0.947382	4.52349e-11	0.0748734
Module4	ERF076	0.00596904	1.2416	AT1G28370	ERF DOMAIN PROTEIN 11	ATERF11-ERF11	ERF076	TFModule	1	Potra2n17c31814	0.87396	1.13138e-07	0.074601
Module4	HHO2	0.00904713	1.19426	AT1G68670	NA	NA	HHO2	TFModule	1	Potra2n8c17705	0.887869	3.93689e-08	0.0730669
Module11	MYB4	0.000194284	1.34267	AT4G38620	myb domain protein 4	ATMYB4-MYB4	MYB4	TFModule	3	Potra2n19c34420	0.753039	8.63799e-05	0.072828
Module6	squamosa	0.0445914	1.1306	AT1G69120	AGAMOUS-like 7	AGL7-AP1-AtAP1	squamosa	TFModule	1	Potra2n12c24243	0.949771	6.92282e-12	0.0727881
Module4	EREB138	0.00247952	1.26483	AT1G50640	NA	ATERF3-ERF3	EREB138	TFModule	1	Potra2n1c3138	0.830857	1.65939e-06	0.0727239
Module4	HSFB2A	0.000362228	1.28253	AT5G62020	ARABIDOPSIS THALIANA HEAT SHOCK TRANSCRIPTION FACTOR B2A	AT-HSFB2A-HSFB2A	HSFB2A	TFModule	1	Potra2n15c28011	0.76245	4.2038e-05	0.0727163
Module22	DOF5.8	0.0370169	1.18755	AT5G66940	NA	NA	DOF5.8	TFModule	2	Potra2n2c5230	0.949828	3.02692e-11	0.0727157
Module4	BZIP28	0.00892923	1.22302	AT3G10800	NA	BZIP28	BZIP28	TFModule	1	Potra2n6c15115	0.885976	4.61445e-08	0.0725882
Module4	LBD13	0.00848383	1.22232	AT2G30340	LOB domain-containing protein 13	LBD13	LBD13	TFModule	1	Potra2n13c24976	0.883371	5.76768e-08	0.0724063
Module7	BPC1	8.55663e-05	1.14303	AT2G01930	BASIC PENTACYSTEINE1	ATBPC1-BBR-BPC1	BPC1	TFModule	1	Potra2n2c6203	0.733134	0.000232069	0.0713857
Module6	WRKY31	0.0283092	1.21423	AT4G22070	NA	ATWRKY31-WRKY31	WRKY31	TFModule	1	Potra2n14c27242	0.92439	3.31304e-10	0.0708633
Module23	AT3G10030	0.0020647	1.71774	AT3G10030	NA	NA	AT3G10030	TFModule	1	Potra2n8c16849	0.822194	3.60907e-06	0.0705678
Module5	MYB3R4	0.000875197	1.48963	AT5G11510	myb domain protein 3R4	AtMYB3R4-MYB3R-4	MYB3R4	TFModule	4	Potra2n18c32912	0.774684	1.71057e-05	0.0703861
Module4	HAT22	0.00288299	1.20113	AT4G37790	NA	HAT22	HAT22	TFModule	1	Potra2n2c5385	0.828551	1.89275e-06	0.0701956
Module6	NAC050	0.0136138	1.1719	AT3G10480	NAC domain containing protein 50	ANAC050-NAC050	NAC050	TFModule	3	Potra2n8c16892	0.887933	1.65371e-08	0.0701156
Module23	TEIL	0.00519762	1.58842	AT3G20770	NA	AtEIN3-EIN3	TEIL	TFModule	1	Potra2n9c18729	0.856618	4.47126e-07	0.0700341
Module11	MYB55	0.00296742	1.38942	AT4G01680	myb domain protein 55	AtMYB55-MYB55	MYB55	TFModule	2	Potra2n10c22314	0.834097	1.91004e-06	0.0698009
Module4	MYB80	9.06519e-05	1.30774	AT5G56110	myb domain protein 103	AtMYB103-ATMYB80-MS188-MYB103-MYB80	MYB80	TFModule	2	Potra2n1c3996	0.704386	0.000273724	0.0695462
Module23	OsEIL3	0.00539169	1.70657	AT1G73730	NA	AtEIL3-ATSLIM-EIL3-SLIM1	OsEIL3	TFModule	1	Potra2n9c18729	0.856618	4.47126e-07	0.069546
Module9	DOF1.6	0.0197854	1.22242	AT1G47655	NA	NA	DOF1.6	TFModule	2	Potra2n7c16311	0.909713	4.6613e-09	0.0685389
Module22	TCX3	0.00607105	1.39158	AT3G22760	NA	SOL1	TCX3	TFModule	1	Potra2n10c21715	0.848614	4.20889e-07	0.0682469
Module9	MYB44	0.0364258	1.30295	AT5G67300	ARABIDOPSIS THALIANA MYB DOMAIN PROTEIN 44	ATMYB44-ATMYBR1-MYB44-MYBR1	MYB44	TFModule	2	Potra2n611s36153	0.93678	1.66757e-10	0.0679228
Module9	MYB70	0.0364258	1.42213	AT2G23290	myb domain protein 70	AtMYB70-MYB70	MYB70	TFModule	2	Potra2n611s36153	0.93678	1.66757e-10	0.0679228
Module9	MYB70	0.0364258	1.42213	AT2G23290	myb domain protein 70	AtMYB70-MYB70	MYB70	TFModule	2	Potra2n611s36153	0.93678	1.66757e-10	0.0679228
Module11	EREB138	0.00711429	1.27652	AT1G50640	NA	ATERF3-ERF3	EREB138	TFModule	1	Potra2n1c3138	0.868038	2.87648e-07	0.0678412
Module4	ASR1	0.00629975	1.19795	AT5G52660	NA	NA	ASR1	TFModule	1	Potra2n4c9074	0.855045	4.21707e-07	0.0677436
Module4	HHO3	0.0132542	1.17687	AT1G25550	NA	NA	HHO3	TFModule	1	Potra2n8c17705	0.887869	3.93689e-08	0.067137
Module3	AT1G72740	0.00065568	1.27087	AT1G72740	NA	NA	AT1G72740	TFModule	1	Potra2n18c32697	0.749234	4.37012e-05	0.0670113
Module4	HSFB2B	0.000716551	1.26075	AT4G11660	NA	AT-HSFB2B-HSF7-HSFB2B	HSFB2B	TFModule	1	Potra2n15c28011	0.76245	4.2038e-05	0.0664556
Module4	SMB	0.000464993	1.21505	AT1G79580	Arabidopsis NAC domain containing protein 33	ANAC033-SMB-URP7	SMB	TFModule	1	Potra2n14c27178	0.743542	7.65509e-05	0.0662354
Module22	DOF3.2	0.0168608	1.27372	AT3G45610	DOF transcription factor 6	DOF6	DOF3.2	TFModule	2	Potra2n15c29140	0.89081	2.46318e-08	0.0651433
Module7	ARF18	0.00141156	1.30774	AT5G37020	auxin response factor 8	ARF8-ATARF8	ARF18	TFModule	1	Potra2n1c3166	0.798484	1.87019e-05	0.0650745
Module12	SBP6	0.00657893	1.31123	AT2G42200	NA	AtSPL9-SPL9	SBP6	TFModule	1	Potra2n7c15463	0.863131	6.70741e-07	0.0650405
Module4	BZIP11	0.00587813	1.24149	AT4G34590	NA	ATB2-AtbZIP11-BZIP11-GBF6	BZIP11	TFModule	1	Potra2n2c4633	0.840676	9.86032e-07	0.0646961
Module6	TCX6	0.0224601	1.14748	AT2G20110	NA	NA	TCX6	TFModule	1	Potra2n18c32560	0.89513	8.33867e-09	0.0643127
Module23	NAC073	0.0136201	1.41701	AT4G28500	NAC domain containing protein 73	ANAC073-NAC073-SND2	SND2	TFModule	4	Potra2n4c8837	0.882419	8.37155e-08	0.0637622
Module15	BZIP53	0.0339636	1.3249	AT3G62420	basic region/leucine zipper motif 53	ATBZIP53-BZIP53	BZIP53	TFModule	1	Potra2n7c16463	0.93128	1.19989e-09	0.0632786
Module9	DOF5.8	0.027635	1.088	AT5G66940	NA	NA	DOF5.8	TFModule	2	Potra2n7c16311	0.909713	4.6613e-09	0.0627008
Module23	ERF011	0.015015	1.59607	AT3G50260	NA	ATERF#011-CEJ1-DEAR1	ERF011	TFModule	1	Potra2n2c5283	0.880676	8.37155e-08	0.062315
Module12	SVP	0.00717917	1.18204	AT2G22540	AGAMOUS-like 22	AGL22-FAQ1-SVP	SVP	TFModule	1	Potra2n7c16552	0.856909	9.88995e-07	0.0621643
Module11	AT1G19000	0.000865835	1.31049	AT1G19000	NA	NA	AT1G19000	TFModule	1	Potra2n10c22092	0.757909	7.23092e-05	0.0612354
Module12	WRKY2	0.0121825	1.39858	AT5G56270	ARABIDOPSIS THALIANA WRKY DNA-BINDING PROTEIN 2	ATWRKY2-WRKY2	WRKY2	TFModule	1	Potra2n818s36797	0.881816	2.39033e-07	0.0612059
Module6	WRKY25	0.0283092	1.21423	AT2G30250	NA	ATWRKY25-WRKY25	WRKY25	TFModule	1	Potra2n13c25005	0.89582	8.08737e-09	0.0604909
Module11	TRP1	0.00852515	1.18689	AT5G59430	TELOMERE REPEAT BINDING PROTEIN 1	ATTRP1-TRP1	TRP1	TFModule	1	Potra2n1c2093	0.847178	9.60482e-07	0.0601274
Module7	MYB61	0.0197605	1.19082	AT1G09540	ARABIDOPSIS THALIANA MYB DOMAIN PROTEIN 61	ATMYB61-MYB61	MYB61	TFModule	3	Potra2n15c28466	0.892469	6.00345e-08	0.0594274
Module4	O2	0.00198604	1.21594	AT4G02640	Arabidopsis thaliana basic leucine zipper 10	ATBZIP10-BZO2H1	O2	TFModule	1	Potra2n2c6035	0.772491	2.85261e-05	0.0592967
Module4	VIT_17s0000g10420	0.00312291	1.45596	AT1G13450	GT-1	GT-1	VIT_17s0000g10420	TFModule	1	Potra2n8c18288	0.79181	1.25821e-05	0.0592836
Module22	BPC1	0.00119732	1.27078	AT2G01930	BASIC PENTACYSTEINE1	ATBPC1-BBR-BPC1	BPC1	TFModule	1	Potra2n4c9892	0.745819	6.2904e-05	0.0592744
Module12	BPC1	0.000317738	1.17001	AT2G01930	BASIC PENTACYSTEINE1	ATBPC1-BBR-BPC1	BPC1	TFModule	1	Potra2n8c17915	0.715682	0.000310167	0.0592588
Module5	MYB3R1	0.00271249	1.55559	AT4G32730	NA	ATMYB3R-1-ATMYB3R1-MYB3R-1-MYB3R1-PC-MYB1	MYB3R1	TFModule	2	Potra2n18c32912	0.774684	1.71057e-05	0.0590783
Module4	ERF082	0.00767062	1.23423	AT1G50640	NA	ATERF3-ERF3	ERF082	TFModule	1	Potra2n1c3138	0.830857	1.65939e-06	0.0590349
Module9	IDD6	0.0178377	1.13763	AT1G14580	NA	NA	IDD6	TFModule	1	Potra2n16c30071	0.870905	1.31262e-07	0.0581091
Module6	MYB43	0.00288473	1.24169	AT5G16600	myb domain protein 43	AtMYB43-MYB43	MYB43	TFModule	3	Potra2n17c30794	0.772266	1.82909e-05	0.0581061
Module11	RAP2-11	0.000235438	1.46976	AT5G19790	related to AP2 11	RAP2.11	RAP2-11	TFModule	1	Potra2n1c42	0.701352	0.000493907	0.0579247
Module11	ARF34	0.0119375	1.22953	AT5G37020	auxin response factor 8	ARF8-ATARF8	ARF34	TFModule	1	Potra2n1c3166	0.857311	5.9645e-07	0.0578003
Module4	AP3	0.00297574	1.15524	AT3G54340	APETALA 3	AP3-ATAP3	AP3	TFModule	1	Potra2n5c11759	0.78021	2.07703e-05	0.0571239
Module11	VIP1	0.000336017	1.33167	AT1G43700	sulphate utilization efficiency 3	SUE3-VIP1	VIP1	TFModule	1	Potra2n13c24971	0.708374	0.000407686	0.0568558
Module11	WRKY71	0.00285741	1.25442	AT1G29860	WRKY DNA-BINDING PROTEIN 71	ATWRKY71-WRKY71	WRKY71	TFModule	1	Potra2n2c5891	0.787481	2.37404e-05	0.0568094
Module4	HSFA1B	0.00520148	1.2106	AT5G16820	ARABIDOPSIS HEAT SHOCK FACTOR 3	ATHSF3-ATHSFA1B-HSF3-HSFA1B	HSFA1B	TFModule	1	Potra2n13c25592	0.803124	7.2518e-06	0.05668
Module4	GLYMA-06G314400	0.0118511	1.21993	AT3G56850	ABA-responsive element binding protein 3	AREB3-DPBF3	GLYMA-06G314400	TFModule	1	Potra2n10c20174	0.844945	8.15907e-07	0.0566295
Module9	DOF1.7	0.0393833	1.10083	AT1G51700	DOF zinc finger protein 1	ADOF1-DOF1	DOF1.7	TFModule	2	Potra2n7c16311	0.909713	4.6613e-09	0.0565112
Module4	Zm00001d024324	0.0210465	1.27174	AT1G28370	ERF DOMAIN PROTEIN 11	ATERF11-ERF11	Zm00001d024324	TFModule	1	Potra2n17c31814	0.87396	1.13138e-07	0.0562442
Module4	BZIP53	0.0115007	1.223	AT3G62420	basic region/leucine zipper motif 53	ATBZIP53-BZIP53	BZIP53	TFModule	1	Potra2n2c4633	0.840676	9.86032e-07	0.0562426
Module4	DPBF3	0.012219	1.21243	AT3G56850	ABA-responsive element binding protein 3	AREB3-DPBF3	DPBF3	TFModule	1	Potra2n10c20174	0.844945	8.15907e-07	0.0562393
Module4	Zm00001d049364	0.00982662	1.24926	AT3G20310	NA	ATERF-7-ATERF7-ERF7	Zm00001d049364	TFModule	1	Potra2n1c3138	0.830857	1.65939e-06	0.0560325
Module12	MYB4	0.00113861	1.32676	AT4G38620	myb domain protein 4	ATMYB4-MYB4	MYB4	TFModule	3	Potra2n4c9673	0.743043	0.000130764	0.0552
Module12	ARF16	0.00409765	1.20524	AT1G30330	auxin response factor 6	ARF6	ARF16	TFModule	1	Potra2n1c3166	0.799749	1.65599e-05	0.0551167
Module12	MYB61	0.0135193	1.24431	AT1G09540	ARABIDOPSIS THALIANA MYB DOMAIN PROTEIN 61	ATMYB61-MYB61	MYB61	TFModule	3	Potra2n10c22314	0.853677	1.07123e-06	0.0538809
Module7	BPC6	0.000916499	1.13669	AT5G42520	ARABIDOPSIS THALIANA BASIC PENTACYSTEINE 6	ATBPC6-BBR/BPC6-BPC6	BPC6	TFModule	1	Potra2n2c6203	0.733134	0.000232069	0.0533128
Module15	OsbZIP77	0.0284434	1.31653	AT2G17770	basic region/leucine zipper motif 27	ATBZIP27-BZIP27-FDP	OsbZIP77	TFModule	1	Potra2n5c10648	0.895354	7.57505e-08	0.0531575
Module23	NAC075	0.00666457	1.50779	AT4G29230	NAC domain containing protein 75	anac075-NAC075	NAC075	TFModule	2	Potra2n18c32675	0.8036	8.76732e-06	0.0531424
Module11	TRP2	0.0150133	1.16414	AT3G46590	NA	ATTRP2-TRFL1-TRP2	TRP2	TFModule	1	Potra2n1c2093	0.847178	9.60482e-07	0.0529859
Module9	TCP22	0.00928905	1.26161	AT1G72010	NA	NA	TCP22	TFModule	4	Potra2n4c10360	0.811692	4.06686e-06	0.0528945
Module11	SBP8	0.00388892	1.32115	AT2G42200	NA	AtSPL9-SPL9	SBP8	TFModule	1	Potra2n7c15463	0.777598	3.37088e-05	0.0520483
Module12	SMB	0.0121825	1.19448	AT1G79580	Arabidopsis NAC domain containing protein 33	ANAC033-SMB-URP7	SMB	TFModule	1	Potra2n2c4785	0.837881	2.40703e-06	0.0519345
Module6	TGA6	0.0256952	1.2082	AT3G12250	NA	BZIP45-TGA6	TGA6	TFModule	1	Potra2n16c29535	0.858472	1.74225e-07	0.0518973
Module15	Zm00001d018571	0.031275	1.7849	AT4G35900	NA	atbzip14-FD-FD-1	Zm00001d018571	TFModule	1	Potra2n5c10648	0.895354	7.57505e-08	0.0517404
Module11	Zm00001d049364	0.0240017	1.25631	AT3G20310	NA	ATERF-7-ATERF7-ERF7	Zm00001d049364	TFModule	1	Potra2n1c3138	0.868038	2.87648e-07	0.0511606
Module9	HHO6	0.0240033	1.21245	AT1G49560	NA	NA	HHO6	TFModule	1	Potra2n5c11630	0.858642	2.8914e-07	0.0511421
Module23	BHLH104	0.00495267	1.8838	AT4G14410	basic Helix-Loop-Helix 104	bHLH104	BHLH104	TFModule	1	Potra2n10c21811	0.776223	2.54924e-05	0.0511312
Module11	WRKY8	0.00514484	1.23443	AT5G46350	ARABIDOPSIS THALIANA WRKY DNA-BINDING PROTEIN 8	ATWRKY8-WRKY8	WRKY8	TFModule	1	Potra2n2c5891	0.787481	2.37404e-05	0.0511062
Module23	WRKY23	0.0373478	1.4077	AT2G47260	WRKY DNA-BINDING PROTEIN 23	ATWRKY23-WRKY23	WRKY23	TFModule	1	Potra2n10c21019	0.889153	6.18782e-08	0.0496961
Module15	OsbZIP69	0.0361972	1.28996	AT4G35900	NA	atbzip14-FD-FD-1	OsbZIP69	TFModule	1	Potra2n5c10648	0.895354	7.57505e-08	0.0495577
Module23	NAC010	0.0357298	1.38369	AT1G28470	NAC domain containing protein 10	ANAC010-NAC010-SND3	SND3	TFModule	4	Potra2n4c8837	0.882419	8.37155e-08	0.0494484
Module4	SVP	0.0161405	1.11628	AT2G22540	AGAMOUS-like 22	AGL22-FAQ1-SVP	SVP	TFModule	1	Potra2n7c16552	0.827229	2.02887e-06	0.049262
Module6	SMB	0.00288473	1.2054	AT1G79580	Arabidopsis NAC domain containing protein 33	ANAC033-SMB-URP7	SMB	TFModule	1	Potra2n14c27178	0.723868	0.000103658	0.0488664
Module7	NAC043	0.0360351	1.44404	AT2G46770	Arabidopsis NAC domain containing protein 43	ANAC043-NST1	NST1	TFModule	4	Potra2n1c3797	0.883895	1.07324e-07	0.0485703
Module12	BPC6	0.00141239	1.1582	AT5G42520	ARABIDOPSIS THALIANA BASIC PENTACYSTEINE 6	ATBPC6-BBR/BPC6-BPC6	BPC6	TFModule	1	Potra2n8c17915	0.715682	0.000310167	0.0482829
Module23	HSFB3	0.0260979	1.35106	AT2G41690	heat shock transcription factor B3	AT-HSFB3-HSFB3-HSFB3	HSFB3	TFModule	1	Potra2n6c14973	0.855125	4.90407e-07	0.0482406
Module4	WRKY1	0.0435234	1.16661	AT2G04880	NA	ATWRKY1-WRKY1-ZAP1	WRKY1	TFModule	1	Potra2n1c3191	0.8822	6.14551e-08	0.0474025
Module7	BPC5	0.0019906	1.12646	AT4G38910	NA	ATBPC5-BBR/BPC5-BPC5	BPC5	TFModule	1	Potra2n2c6203	0.733134	0.000232069	0.0474013
Module11	TRP5	0.0240911	1.27413	AT1G07540	TRF-like 2	TRFL2	TRP5	TFModule	1	Potra2n1c2093	0.847178	9.60482e-07	0.0470182
Module11	ERF082	0.0337515	1.21167	AT1G50640	NA	ATERF3-ERF3	ERF082	TFModule	1	Potra2n1c3138	0.868038	2.87648e-07	0.0464844
Module7	NAC105	0.0499367	1.11029	AT5G66300	Arabidopsis NAC domain containing protein 105	ANAC105-NAC105-VND3	VND3	TFModule	4	Potra2n1c1031	0.897451	4.04374e-08	0.0464661
Module23	MYB43	0.0388474	1.3202	AT5G16600	myb domain protein 43	AtMYB43-MYB43	MYB43	TFModule	3	Potra2n17c30794	0.872726	1.60345e-07	0.0462843
Module23	LBD13	0.00992928	1.53914	AT2G30340	LOB domain-containing protein 13	LBD13	LBD13	TFModule	1	Potra2n13c24976	0.786261	1.72517e-05	0.0460709
Module11	HAT22	0.02389	1.1736	AT4G37790	NA	HAT22	HAT22	TFModule	1	Potra2n2c5385	0.839886	1.35508e-06	0.0459534
Module23	O2	0.0460446	1.29737	AT4G02640	Arabidopsis thaliana basic leucine zipper 10	ATBZIP10-BZO2H1	O2	TFModule	1	Potra2n5c10904	0.885231	8.00376e-08	0.0458102
Module12	SGR5	0.00371667	1.17147	AT2G01940	ARABIDOPSIS THALIANA INDETERMINATE(ID)-DOMAIN 15	ATIDD15-SGR5	SGR5	TFModule	3	Potra2n15c28920	0.746095	0.000126987	0.0457148
Module23	OsCCA1	0.0118608	1.47072	AT1G01060	LATE ELONGATED HYPOCOTYL	LHY-LHY1	OsCCA1	TFModule	1	Potra2n14c27196	0.794929	1.32348e-05	0.0453659
Module11	ERF4	0.0304105	1.26841	AT3G15210	ETHYLENE RESPONSIVE ELEMENT BINDING FACTOR 4	ATERF-4-ATERF4-ERF4-RAP2.5	ERF4	TFModule	1	Potra2n17c31814	0.851934	7.29949e-07	0.0449517
Module23	LHY	0.0128588	1.41595	AT1G01060	LATE ELONGATED HYPOCOTYL	LHY-LHY1	LHY	TFModule	1	Potra2n14c27196	0.794929	1.32348e-05	0.0445395
Module6	MYB4	0.0124187	1.21644	AT4G38620	myb domain protein 4	ATMYB4-MYB4	MYB4	TFModule	3	Potra2n4c9980	0.776994	1.53827e-05	0.0442946
Module12	SOC1	0.00343191	1.19558	AT2G45660	AGAMOUS-like 20	AGL20-ATSOC1-SOC1	SOC1	TFModule	1	Potra2n2c5049	0.732822	0.000191331	0.0442475
Module11	MYB3R5	0.0307252	1.27157	AT5G02320	ARABIDOPSIS THALIANA MYB DOMAIN PROTEIN 3R5	ATMYB3R5-MYB3R-5	MYB3R5	TFModule	4	Potra2n6c14593	0.846424	9.72009e-07	0.0439108
Module4	bZIP911	0.0315679	1.18251	AT3G62420	basic region/leucine zipper motif 53	ATBZIP53-BZIP53	bZIP911	TFModule	1	Potra2n2c4633	0.840676	9.86032e-07	0.0435246
Module11	MYB3	0.00620655	1.34501	AT1G22640	ARABIDOPSIS THALIANA MYB DOMAIN PROTEIN 3	ATMYB3-MYB3	MYB3	TFModule	2	Potra2n19c34420	0.753039	8.63799e-05	0.0433085
Module6	NAC016	0.0373105	1.20127	AT1G34180	NAC domain containing protein 16	anac016-NAC016	NAC016	TFModule	2	Potra2n5c11066	0.84001	5.53384e-07	0.0431495
Module4	WRKY8	0.0118511	1.17152	AT5G46350	ARABIDOPSIS THALIANA WRKY DNA-BINDING PROTEIN 8	ATWRKY8-WRKY8	WRKY8	TFModule	1	Potra2n2c5891	0.767713	3.40287e-05	0.0415596
Module9	HAT1	0.00510836	1.27036	AT4G17460	NA	HAT1-JAB	HAT1	TFModule	3	Potra2n6c13644	0.719494	0.000177606	0.0415038
Module11	AT1G74840	0.00853526	1.26228	AT1G74840	NA	NA	AT1G74840	TFModule	1	Potra2n10c22092	0.757909	7.23092e-05	0.0413649
Module11	ERF8	0.0402556	1.21466	AT1G53170	NA	ATERF-8-ATERF8-ERF8	ERF8	TFModule	1	Potra2n17c31814	0.851934	7.29949e-07	0.0413424
Module23	bHLH34	0.0139454	1.6509	AT3G23210	basic Helix-Loop-Helix 34	bHLH34	bHLH34	TFModule	1	Potra2n10c21811	0.776223	2.54924e-05	0.0411587
Module9	DOF3.2	0.00510836	1.15073	AT3G45610	DOF transcription factor 6	DOF6	DOF3.2	TFModule	2	Potra2n15c29140	0.716276	0.000194847	0.0410585
Module11	AHL12	0.00644949	1.27912	AT1G63480	AT-hook motif nuclear localized protein 12	AHL12	AHL12	TFModule	1	Potra2n14c26972	0.741315	0.000136514	0.040879
Module4	WRKY12	0.0309219	1.20732	AT2G44745	NA	AtWRKY12-WRKY12	WRKY12	TFModule	1	Potra2n2c5151	0.821798	2.78209e-06	0.040501
Module6	ARF13	0.0277623	1.23475	AT5G62000	ARF1-BINDING PROTEIN	ARF1-BP-ARF2-HSS-ORE14	ARF13	TFModule	1	Potra2n15c28227	0.805459	4.13359e-06	0.0404644
Module9	DOF3.5	0.00581867	1.23298	AT3G52440	NA	NA	DOF3.5	TFModule	2	Potra2n15c29140	0.716276	0.000194847	0.0400455
Module7	MYB83	0.0119021	1.14968	AT3G08500	myb domain protein 83	AtMYB83-MYB83	MYB83	TFModule	4	Potra2n9c19651	0.777162	4.98399e-05	0.0399793
Module6	NAC075	0.0472657	1.16922	AT4G29230	NAC domain containing protein 75	anac075-NAC075	NAC075	TFModule	2	Potra2n18c32675	0.839443	5.70456e-07	0.0399617
Module5	MYB1	0.0152165	1.63947	AT3G09230	myb domain protein 1	AtMYB1-MYB1	MYB1	TFModule	2	Potra2n8c17182	0.762672	2.80934e-05	0.039948
Module23	RAP2-12	0.024657	1.53055	AT1G53910	related to AP2 12	RAP2.12	RAP2-12	TFModule	1	Potra2n1c1438	0.803923	8.73402e-06	0.0392808
Module12	TRP2	0.00879003	1.20138	AT3G46590	NA	ATTRP2-TRFL1-TRP2	TRP2	TFModule	1	Potra2n1c2093	0.749134	0.000113962	0.0391481
Module9	TCP8	0.0316657	1.21524	AT1G58100	TCP domain protein 8	TCP8	TCP8	TFModule	4	Potra2n4c10360	0.811692	4.06686e-06	0.0390302
Module12	SBP8	0.0495079	1.23273	AT2G42200	NA	AtSPL9-SPL9	SBP8	TFModule	1	Potra2n7c15463	0.863131	6.70741e-07	0.0389116
Module4	EIL4	0.0117537	1.15581	AT3G20770	NA	AtEIN3-EIN3	EIL4	TFModule	1	Potra2n9c18729	0.748875	6.79647e-05	0.0388372
Module4	HSFA1E	0.0281326	1.13156	AT3G02990	heat shock transcription factor A1E	ATHSFA1E-HSFA1E	HSFA1E	TFModule	1	Potra2n13c25592	0.803124	7.2518e-06	0.0384867
Module11	BZIP69	0.00537975	1.26297	AT1G06070	NA	NA	BZIP69	TFModule	1	Potra2n17c31613	0.716672	0.000323989	0.0382359
Module11	BZIP18	0.00529445	1.24751	AT2G40620	NA	NA	BZIP18	TFModule	1	Potra2n13c24971	0.708374	0.000407686	0.037256
Module12	WRKY28	0.0121825	1.39858	AT4G18170	NA	ATWRKY28-WRKY28	WRKY28	TFModule	1	Potra2n2c5891	0.755072	9.74619e-05	0.037077
Module4	ERF104	0.00982662	1.19545	AT5G61600	ethylene response factor 104	ERF104	ERF104	TFModule	1	Potra2n1c644	0.72198	0.000159165	0.0368197
Module6	CCA1	0.0120737	1.25249	AT2G46830	NA	AtCCA1-CCA1	CCA1	TFModule	1	Potra2n2c4766	0.720931	0.000113564	0.0365374
Module6	WRKY45	0.0297141	1.16079	AT3G01970	WRKY DNA-BINDING PROTEIN 45	ATWRKY45-WRKY45	WRKY45	TFModule	1	Potra2n1c486	0.781348	1.27086e-05	0.0361006
Module23	BIM1	0.0164719	1.76537	AT5G08130	NA	BIM1	BIM1	TFModule	1	Potra2n4c9466	0.747819	8.01117e-05	0.0352726
Module9	MYB3R5	0.0360495	1.2923	AT5G02320	ARABIDOPSIS THALIANA MYB DOMAIN PROTEIN 3R5	ATMYB3R5-MYB3R-5	MYB3R5	TFModule	4	Potra2n3c7379	0.794252	9.62481e-06	0.0349574
Module15	WRKY11	0.0284434	1.28442	AT4G31550	NA	ATWRKY11-WRKY11	WRKY11	TFModule	1	Potra2n18c32086	0.814441	2.13134e-05	0.034873
Module31	TCP23	0.0233588	2.3206	AT1G35560	NA	AtTCP23-TCP23	TCP23	TFModule	1	Potra2n11c23312	0.769191	3.89539e-05	0.0347389
Module15	WRKY17	0.029016	1.24915	AT2G24570	NA	ATWRKY17-WRKY17	WRKY17	TFModule	1	Potra2n18c32086	0.814441	2.13134e-05	0.0346777
Module4	TRB1	0.0191434	1.15652	AT1G49950	TELOMERE REPEAT BINDING FACTOR 1	ATTRB1-TRB1	TRB1	TFModule	1	Potra2n9c19354	0.749478	6.79647e-05	0.0345739
Module9	PHL2	0.0240033	1.21245	AT3G24120	NA	NA	PHL2	TFModule	1	Potra2n1c2734	0.76234	3.81513e-05	0.034558
Module4	WRKY2	0.0475424	1.21698	AT5G56270	ARABIDOPSIS THALIANA WRKY DNA-BINDING PROTEIN 2	ATWRKY2-WRKY2	WRKY2	TFModule	1	Potra2n818s36797	0.814187	4.13022e-06	0.0343932
Module23	At3g11280	0.0106385	1.34643	AT3G11280	NA	NA	At3g11280	TFModule	1	Potra2n16c30276	0.710714	0.000255642	0.0342268
Module6	MYB10	0.0133127	1.19463	AT3G12820	myb domain protein 10	AtMYB10-MYB10	MYB10	TFModule	2	Potra2n7c16051	0.707619	0.000175395	0.0340194
Module23	CCA1	0.0382159	1.3915	AT2G46830	NA	AtCCA1-CCA1	CCA1	TFModule	1	Potra2n14c27196	0.794929	1.32348e-05	0.0333965
Module23	BZIP68	0.0324627	1.39441	AT1G32150	NA	AtbZIP68-bZIP68	BZIP68	TFModule	1	Potra2n3c7639	0.778998	2.29543e-05	0.0333466
Module23	ARALYDRAFT_495258	0.0139454	1.4618	AT5G51910	NA	NA	ARALYDRAFT_495258	TFModule	1	Potra2n14c26942	0.719366	0.00019793	0.0331833
Module23	AT5G56840	0.0106385	1.43379	AT5G56840	NA	NA	AT5G56840	TFModule	1	Potra2n6c13987	0.701448	0.000331716	0.0331489
Module4	WRKY47	0.0174661	1.19528	AT4G01720	NA	AtWRKY47-WRKY47	WRKY47	TFModule	1	Potra2n14c27242	0.729587	0.000125807	0.0331055
Module15	REV	0.0417709	1.21434	AT5G60690	INTERFASCICULAR FIBERLESS	IFL-IFL1-REV	REV	TFModule	1	Potra2n9c19989	0.828111	1.34524e-05	0.0324394
Module22	BPC6	0.0254008	1.2399	AT5G42520	ARABIDOPSIS THALIANA BASIC PENTACYSTEINE 6	ATBPC6-BBR/BPC6-BPC6	BPC6	TFModule	1	Potra2n4c9892	0.745819	6.2904e-05	0.0323609
Module23	BZIP16	0.0361279	1.37047	AT2G35530	NA	AtbZIP16-bZIP16	BZIP16	TFModule	1	Potra2n3c7639	0.778998	2.29543e-05	0.0323059
Module23	VIT_15s0048g01150	0.0156877	1.4446	AT2G45680	TCP domain protein 9	TCP9	VIT_15s0048g01150	TFModule	1	Potra2n14c26942	0.719366	0.00019793	0.032269
Module23	ERF2	0.0283987	1.38715	AT5G47220	ETHYLENE RESPONSE FACTOR- 2	ATERF-2-ATERF2-ERF2	ERF2	TFModule	1	Potra2n3c7136	0.757328	5.52239e-05	0.0318003
Module11	ARF3	0.0116765	1.35791	AT2G33860	AUXIN RESPONSE TRANSCRIPTION FACTOR 3	ARF3-ETT	ARF3	TFModule	1	Potra2n4c8843	0.700179	0.000507987	0.0307424
Module4	WRKY21	0.0458656	1.13145	AT2G30590	WRKY DNA-binding protein 21	WRKY21	WRKY21	TFModule	1	Potra2n1c1042	0.775277	2.56121e-05	0.0296766
Module6	OsCCA1	0.0277623	1.19391	AT1G01060	LATE ELONGATED HYPOCOTYL	LHY-LHY1	OsCCA1	TFModule	1	Potra2n2c4766	0.720931	0.000113564	0.0296493
Module22	BPC5	0.0370169	1.23591	AT4G38910	NA	ATBPC5-BBR/BPC5-BPC5	BPC5	TFModule	1	Potra2n4c9892	0.745819	6.2904e-05	0.0290429
Module4	ERF105	0.0262926	1.18297	AT5G51190	NA	NA	ERF105	TFModule	1	Potra2n1c644	0.72198	0.000159165	0.0289806
Module4	ERF6	0.0262926	1.32911	AT4G17490	ethylene responsive element binding factor 6	ATERF6-ERF-6-6-ERF6	ERF6	TFModule	1	Potra2n1c644	0.72198	0.000159165	0.0289806
Module22	AHL13	0.0423243	1.53568	AT4G17950	AT-hook motif nuclear localized protein 13	AHL13	AHL13	TFModule	1	Potra2n1c1230	0.755764	4.4641e-05	0.0288502
Module4	WRKY28	0.0475424	1.21698	AT4G18170	NA	ATWRKY28-WRKY28	WRKY28	TFModule	1	Potra2n2c5891	0.767713	3.40287e-05	0.0285426
Module11	NAC030	0.0216388	1.31247	AT1G71930	NA	NA	VND7	TFModule	4	Potra2n13c25337	0.714209	0.000345058	0.0278308
Module12	BPC5	0.0250261	1.11127	AT4G38910	NA	ATBPC5-BBR/BPC5-BPC5	BPC5	TFModule	1	Potra2n8c17915	0.715682	0.000310167	0.027133
Module4	ERF5	0.0336915	1.13988	AT5G47230	ETHYLENE RESPONSIVE ELEMENT BINDING FACTOR- 5	ATERF-5-ATERF5-AtMACD1-ERF102-ERF5	ERF5	TFModule	1	Potra2n1c644	0.72198	0.000159165	0.0270056
Module23	BZIP28	0.0328724	1.41882	AT3G10800	NA	BZIP28	BZIP28	TFModule	1	Potra2n6c15115	0.722972	0.000185582	0.026724
Module4	NAC043	0.0482612	1.35756	AT2G46770	Arabidopsis NAC domain containing protein 43	ANAC043-NST1	NST1	TFModule	4	Potra2n14c27178	0.743542	7.65509e-05	0.0261638
Module23	BZIP53	0.039293	1.4164	AT3G62420	basic region/leucine zipper motif 53	ATBZIP53-BZIP53	BZIP53	TFModule	1	Potra2n2c4633	0.729765	0.000148476	0.0259855
Module23	AT5G05790	0.0324627	1.26867	AT5G05790	NA	NA	AT5G05790	TFModule	1	Potra2n16c30276	0.710714	0.000255642	0.0258223
Module23	SRM1	0.0362384	1.35814	AT5G08520	NA	NA	SRM1	TFModule	1	Potra2n16c30276	0.710714	0.000255642	0.0249934
Module23	TCP19	0.0409406	1.35971	AT5G51910	NA	NA	TCP19	TFModule	1	Potra2n14c26942	0.719366	0.00019793	0.024819
Module23	BZIP11	0.0460446	1.38443	AT4G34590	NA	ATB2-AtbZIP11-BZIP11-GBF6	BZIP11	TFModule	1	Potra2n2c4633	0.729765	0.000148476	0.0247125
Module6	MYB58	0.044568	1.12158	AT1G16490	MYB DOMAIN PROTEIN 58	ATMYB58-MYB58	MYB58	TFModule	3	Potra2n7c16051	0.707619	0.000175395	0.0245021
Module4	GLYMA19G26560	0.0458126	1.14158	AT3G27010	ARABIDOPSIS THALIANA TEOSINTE BRANCHED 1, CYCLOIDEA, PCF (TCP)-DOMAIN FAMILY PROTEIN 20	AT-TCP20-ATTCP20-PCF1-TCP20	GLYMA19G26560	TFModule	1	Potra2n3c6976	0.717471	0.000179409	0.0242216
Module4	Glyma19g26560.1	0.0458126	1.14158	AT3G27010	ARABIDOPSIS THALIANA TEOSINTE BRANCHED 1, CYCLOIDEA, PCF (TCP)-DOMAIN FAMILY PROTEIN 20	AT-TCP20-ATTCP20-PCF1-TCP20	Glyma19g26560.1	TFModule	1	Potra2n3c6976	0.717471	0.000179409	0.0242216
Module11	BZIP52	0.0411722	1.16998	AT1G06850	basic leucine-zipper 52	AtbZIP52-bZIP52	BZIP52	TFModule	1	Potra2n13c24971	0.708374	0.000407686	0.0226759
Module11	RAP2-12	0.04896	1.22176	AT1G53910	related to AP2 12	RAP2.12	RAP2-12	TFModule	1	Potra2n3c7897	0.706735	0.000417168	0.0213812
Module15	bHLH130	0.031275	1.24441	AT2G42280	ABA-responsive kinase substrate 3	AKS3-FBH4	bHLH130	TFModule	1	Potra2n1c2330	0.702368	0.00127944	0.0210212
MYB4	MYB46	1	1	NA	NA	NA	MYB46	TFTF	4	NA	0	1	0
MYB4	MYB83	1	1	NA	NA	NA	MYB83	TFTF	4	NA	0	1	0
MYB43	MYB83	1	1	NA	NA	NA	MYB83	TFTF	4	NA	0	1	0
MYB46	BRN2	1	1	NA	NA	NA	BRN2	TFTF	4	NA	0	1	0
MYB46	NAC007	1	1	NA	NA	NA	VND4	TFTF	4	NA	0	1	0
MYB46	NAC037	1	1	NA	NA	NA	VND1	TFTF	4	NA	0	1	0
MYB46	NAC076	1	1	NA	NA	NA	VND2	TFTF	4	NA	0	1	0
MYB46	NAC101	1	1	NA	NA	NA	VND6	TFTF	4	NA	0	1	0
MYB46	NAC105	1	1	NA	NA	NA	VND3	TFTF	4	NA	0	1	0
MYB58	MYB46	1	1	NA	NA	NA	MYB46	TFTF	4	NA	0	1	0
MYB58	MYB83	1	1	NA	NA	NA	MYB83	TFTF	4	NA	0	1	0
MYB63	MYB46	1	1	NA	NA	NA	MYB46	TFTF	4	NA	0	1	0
MYB63	MYB83	1	1	NA	NA	NA	MYB83	TFTF	4	NA	0	1	0
MYB83	BRN2	1	1	NA	NA	NA	BRN2	TFTF	4	NA	0	1	0
MYB83	NAC007	1	1	NA	NA	NA	VND4	TFTF	4	NA	0	1	0
MYB83	NAC037	1	1	NA	NA	NA	VND1	TFTF	4	NA	0	1	0
MYB83	NAC076	1	1	NA	NA	NA	VND2	TFTF	4	NA	0	1	0
MYB83	NAC101	1	1	NA	NA	NA	VND6	TFTF	4	NA	0	1	0
MYB83	NAC105	1	1	NA	NA	NA	VND3	TFTF	4	NA	0	1	0
SND3	MYB46	1	1	NA	NA	NA	MYB46	TFTF	4	NA	0	1	0
SND3	MYB83	1	1	NA	NA	NA	MYB83	TFTF	4	NA	0	1	0
SND2	MYB46	1	1	NA	NA	NA	MYB46	TFTF	4	NA	0	1	0
SND2	MYB83	1	1	NA	NA	NA	MYB83	TFTF	4	NA	0	1	0

## Sheet: Pt SCW cesA
Module	Motif	MotifPvalue	MotifEffectSize	locus_name	full_name	symbol_all	Node	Type	Importance	Gene	Correlation	ExpressionPvalue	Score
cesA	NAC010	0.1	1	AT1G28470	NAC domain containing protein 10	ANAC010-NAC010-SND3	SND3	TFModule	4	Potra2n7c15489	0.988542	2.15707e-20	1
cesA	NAC073	0.2	0.8	AT4G28500	NAC domain containing protein 73	ANAC073-NAC073-SND2	SND2	TFModule	4	Potra2n7c15489	0.988542	2.15707e-20	0.69897
cesA	HHO2	0.2	0.8	AT1G68670	NA	NA	HHO2	TFModule	1	Potra2n8c17705	0.98408	9.26964e-19	0.640923
cesA	NAC105	0.1	1	AT5G66300	Arabidopsis NAC domain containing protein 105	ANAC105-NAC105-VND3	VND3	TFModule	4	Potra2n7c16511	0.947906	6.46809e-13	0.619808
cesA	BRN2	0.1	1	AT4G10350	NAC domain containing protein 70	ANAC070-BRN2-NAC070	BRN2	TFModule	4	Potra2n2c4785	0.85939	3.76834e-08	0.377494
cesA	NAC066	0.1	1	AT3G61910	NA	NA	NST2	TFModule	4	Potra2n2c4785	0.85939	3.76834e-08	0.377494
cesA	ERF9	0.2	0.8	AT5G44210	ERF DOMAIN PROTEIN- 9	ATERF-9-ATERF9-ERF9	ERF9	TFModule	1	Potra2n17c31814	0.88385	4.74224e-09	0.295851
cesA	SVP	0.2	0.8	AT2G22540	AGAMOUS-like 22	AGL22-FAQ1-SVP	SVP	TFModule	1	Potra2n7c16552	0.873062	1.24649e-08	0.280934
cesA	SGR5	0.1	1	AT2G01940	ARABIDOPSIS THALIANA INDETERMINATE(ID)-DOMAIN 15	ATIDD15-SGR5	SGR5	TFModule	3	Potra2n15c28920	0.783496	3.62624e-06	0.276645
cesA	AT1G19000	0.2	0.8	AT1G19000	NA	NA	AT1G19000	TFModule	1	Potra2n10c22092	0.845551	1.03278e-07	0.248295
cesA	NAC007	0.4	0.6	AT1G12260	NAC 007	ANAC007-EMB2749-NAC007-VND4	VND4	TFModule	4	Potra2n7c16511	0.947906	6.46809e-13	0.246646
cesA	NAC037	0.4	0.6	AT2G18060	Arabidopsis NAC domain containing protein 37	ANAC037-VND1	VND1	TFModule	4	Potra2n7c16511	0.947906	6.46809e-13	0.246646
cesA	NAC076	0.4	0.6	AT4G36160	NAC domain containing protein 76	ANAC076-NAC076-VND2	VND2	TFModule	4	Potra2n7c16511	0.947906	6.46809e-13	0.246646
cesA	NAC101	0.4	0.6	AT5G62380	NAC-domain protein 101	ANAC101-NAC101-VND6	VND6	TFModule	4	Potra2n7c16511	0.947906	6.46809e-13	0.246646
cesA	NAC075	0.4	0.6	AT4G29230	NAC domain containing protein 75	anac075-NAC075	NAC075	TFModule	2	Potra2n6c13965	0.934469	8.47014e-12	0.224042
cesA	MYB43	0.2	0.8	AT5G16600	myb domain protein 43	AtMYB43-MYB43	MYB43	TFModule	3	Potra2n17c30794	0.808101	1.03152e-06	0.212772
cesA	ERF104	0.4	0.6	AT5G61600	ethylene response factor 104	ERF104	ERF104	TFModule	1	Potra2n1c644	0.893682	1.80252e-09	0.176935
cesA	ERF105	0.4	0.6	AT5G51190	NA	NA	ERF105	TFModule	1	Potra2n1c644	0.893682	1.80252e-09	0.176935
cesA	ERF5	0.4	0.6	AT5G47230	ETHYLENE RESPONSIVE ELEMENT BINDING FACTOR- 5	ATERF-5-ATERF5-AtMACD1-ERF102-ERF5	ERF5	TFModule	1	Potra2n1c644	0.893682	1.80252e-09	0.176935
cesA	ARF16	0.2	0.8	AT1G30330	auxin response factor 6	ARF6	ARF16	TFModule	1	Potra2n1c3166	0.741601	2.2139e-05	0.165442
cesA	SMB	0.4	0.6	AT1G79580	Arabidopsis NAC domain containing protein 33	ANAC033-SMB-URP7	SMB	TFModule	1	Potra2n2c4785	0.85939	3.76834e-08	0.15022
cesA	MYB4	0.4	0.6	AT4G38620	myb domain protein 4	ATMYB4-MYB4	MYB4	TFModule	3	Potra2n19c34420	0.857899	4.22199e-08	0.149221
cesA	MYB61	0.4	0.6	AT1G09540	ARABIDOPSIS THALIANA MYB DOMAIN PROTEIN 61	ATMYB61-MYB61	MYB61	TFModule	3	Potra2n10c22314	0.852787	6.17412e-08	0.145881
cesA	ZHD10	0.4	0.6	AT5G39760	homeobox protein 23	AtHB23-HB23-ZHD10	ZHD10	TFModule	1	Potra2n17c31200	0.848538	8.37886e-08	0.143198
cesA	EREB138	0.4	0.6	AT1G50640	NA	ATERF3-ERF3	EREB138	TFModule	1	Potra2n1c3138	0.833043	2.36996e-07	0.134061
cesA	ERF082	0.4	0.6	AT1G50640	NA	ATERF3-ERF3	ERF082	TFModule	1	Potra2n1c3138	0.833043	2.36996e-07	0.134061
cesA	ARALYDRAFT_484486	0.4	0.6	AT3G27010	ARABIDOPSIS THALIANA TEOSINTE BRANCHED 1, CYCLOIDEA, PCF (TCP)-DOMAIN FAMILY PROTEIN 20	AT-TCP20-ATTCP20-PCF1-TCP20	ARALYDRAFT_484486	TFModule	1	Potra2n3c6976	0.822175	4.62493e-07	0.128185
cesA	GLYMA19G26560	0.4	0.6	AT3G27010	ARABIDOPSIS THALIANA TEOSINTE BRANCHED 1, CYCLOIDEA, PCF (TCP)-DOMAIN FAMILY PROTEIN 20	AT-TCP20-ATTCP20-PCF1-TCP20	GLYMA19G26560	TFModule	1	Potra2n3c6976	0.822175	4.62493e-07	0.128185
cesA	Glyma19g26560.1	0.4	0.6	AT3G27010	ARABIDOPSIS THALIANA TEOSINTE BRANCHED 1, CYCLOIDEA, PCF (TCP)-DOMAIN FAMILY PROTEIN 20	AT-TCP20-ATTCP20-PCF1-TCP20	Glyma19g26560.1	TFModule	1	Potra2n3c6976	0.822175	4.62493e-07	0.128185
cesA	MYB83	0.4	0.6	AT3G08500	myb domain protein 83	AtMYB83-MYB83	MYB83	TFModule	4	Potra2n1c2305	0.804844	1.23047e-06	0.119586
cesA	TRP1	0.4	0.6	AT5G59430	TELOMERE REPEAT BINDING PROTEIN 1	ATTRP1-TRP1	TRP1	TFModule	1	Potra2n1c2093	0.796185	1.93663e-06	0.1156
cesA	WRKY71	0.4	0.6	AT1G29860	WRKY DNA-BINDING PROTEIN 71	ATWRKY71-WRKY71	WRKY71	TFModule	1	Potra2n2c5891	0.794491	2.11099e-06	0.114843
cesA	WRKY8	0.4	0.6	AT5G46350	ARABIDOPSIS THALIANA WRKY DNA-BINDING PROTEIN 8	ATWRKY8-WRKY8	WRKY8	TFModule	1	Potra2n2c5891	0.794491	2.11099e-06	0.114843
cesA	O2	0.4	0.6	AT4G02640	Arabidopsis thaliana basic leucine zipper 10	ATBZIP10-BZO2H1	O2	TFModule	1	Potra2n2c6035	0.764544	8.60127e-06	0.102498
cesA	NAC030	0.4	0.6	AT1G71930	NA	NA	VND7	TFModule	4	Potra2n13c25337	0.746561	1.81986e-05	0.0959121
cesA	ARF18	0.4	0.6	AT5G37020	auxin response factor 8	ARF8-ATARF8	ARF18	TFModule	1	Potra2n1c3166	0.741601	2.2139e-05	0.0941897
cesA	ARF34	0.4	0.6	AT5G37020	auxin response factor 8	ARF8-ATARF8	ARF34	TFModule	1	Potra2n1c3166	0.741601	2.2139e-05	0.0941897
cesA	SOC1	0.4	0.6	AT2G45660	AGAMOUS-like 20	AGL20-ATSOC1-SOC1	SOC1	TFModule	1	Potra2n12c24811	0.737658	2.57925e-05	0.0928474
cesA	ASR1	0.4	0.6	AT5G52660	NA	NA	ASR1	TFModule	1	Potra2n4c9074	0.72487	4.15841e-05	0.0886501
cesA	RVE4	0.4	0.6	AT5G02840	LHY/CCA1-like 1	LCL1	RVE4	TFModule	1	Potra2n4c9074	0.72487	4.15841e-05	0.0886501
cesA	RVE5	0.4	0.6	AT4G01280	NA	NA	RVE5	TFModule	1	Potra2n4c9074	0.72487	4.15841e-05	0.0886501
cesA	RVE6	0.4	0.6	AT5G52660	NA	NA	RVE6	TFModule	1	Potra2n4c9074	0.72487	4.15841e-05	0.0886501
cesA	RVE8	0.4	0.6	AT3G09600	LHY-CCA1-LIKE5	LCL5-RVE8	RVE8	TFModule	1	Potra2n4c9074	0.72487	4.15841e-05	0.0886501
cesA	ZHD9	0.4	0.6	AT1G26960	homeobox protein 23	AtHB23-HB23	ZHD9	TFModule	1	Potra2n10c21634	0.704236	8.52809e-05	0.0823383

## Sheet: Pa_network
Module	Motif	MotifPvalue	MotifEffectSize	locus_name	full_name	symbol_all	Node	Type	Importance	Gene	Correlation	ExpressionPvalue	Score
Module3	MYB61	7.33369e-31	2.05779	AT1G09540	ARABIDOPSIS THALIANA MYB DOMAIN PROTEIN 61	ATMYB61-MYB61	MYB61	TFModule	3	PA_chr08_G001160	0.801921	1.30203e-05	0.32503
Module3	MYB46	5.23814e-32	2.18331	AT5G12870	MYB DOMAIN PROTEIN 46	ATMYB46-MYB46	MYB46	TFModule	4	PA_chr09_G004772	0.779782	3.11468e-05	0.311232
Module3	MYB83	6.6715e-27	1.77837	AT3G08500	myb domain protein 83	AtMYB83-MYB83	MYB83	TFModule	4	PA_chr09_G004772	0.779782	3.11468e-05	0.260439
Module7	REV	1.33256e-12	1.54749	AT5G60690	INTERFASCICULAR FIBERLESS	IFL-IFL1-REV	REV	TFModule	1	PA_chr05_G002778	0.929031	1.0894e-09	0.234989
Module3	MYB55	5.31095e-19	2.02866	AT4G01680	myb domain protein 55	AtMYB55-MYB55	MYB55	TFModule	2	PA_chr08_G001160	0.801921	1.30203e-05	0.197111
Module3	TGA3	3.21633e-15	1.98206	AT1G22070	TGA1A-related gene 3	TGA3	TGA3	TFModule	1	PA_chr03_G007551	0.843765	1.32226e-06	0.188099
Module5	MYB17	3.92934e-18	1.7076	AT3G61250	myb domain protein 17	AtMYB17-LMI2-MYB17	MYB17	TFModule	1	PA_chr09_G000033	0.843338	1.90596e-05	0.181377
Module4	LRL2	7.19049e-08	1.51889	AT4G30980	LJRHL1-like 2	LRL2	LRL2	TFModule	1	PA_chr07_G003773	0.961975	5.88328e-12	0.177112
Module7	HAT1	3.15149e-09	1.52629	AT4G17460	NA	HAT1-JAB	HAT1	TFModule	3	PA_chr07_G003331	0.91889	3.20774e-09	0.159425
Module7	DOF3.4	2.53834e-15	1.44095	AT3G50410	OBF binding protein 1	OBP1	DOF3.4	TFModule	4	PA_chr06_sUL004_G000003	0.804238	1.54974e-05	0.154988
Module1	MYB3R1	1.5146e-12	2.14222	AT4G32730	NA	ATMYB3R-1-ATMYB3R1-MYB3R-1-MYB3R1-PC-MYB1	MYB3R1	TFModule	2	PA_chr07_G001634	0.836359	2.16747e-06	0.147806
Module1	PC-MYB1	2.29395e-12	2.02355	AT4G32730	NA	ATMYB3R-1-ATMYB3R1-MYB3R-1-MYB3R1-PC-MYB1	PC-MYB1	TFModule	3	PA_chr07_G001634	0.836359	2.16747e-06	0.145552
Module7	DOF5.8	2.93809e-14	1.39278	AT5G66940	NA	NA	DOF5.8	TFModule	2	PA_chr06_sUL004_G000003	0.804238	1.54974e-05	0.143695
Module4	TGA1	1.20239e-08	1.77804	AT5G65210	TGACG sequence-specific binding protein 1	TGA1	TGA1	TFModule	1	PA_chr06_G001995	0.909382	7.03384e-09	0.142557
Module1	MYB3R4	4.2422e-12	1.92653	AT5G11510	myb domain protein 3R4	AtMYB3R4-MYB3R-4	MYB3R4	TFModule	4	PA_chr07_G001634	0.836359	2.16747e-06	0.142213
Module3	Zm00001d052229	6.27369e-11	1.73364	AT1G78080	NA	AtWIND1-RAP2.4-WIND1	Zm00001d052229	TFModule	1	PA_chr03_G007243	0.862263	5.97575e-07	0.140187
Module3	TGA4	5.03704e-11	1.65181	AT5G10030	OCS ELEMENT BINDING FACTOR 4	OBF4-TGA4	TGA4	TFModule	1	PA_chr03_G007551	0.843765	1.32226e-06	0.133655
Module3	LOB	4.92103e-07	1.4712	AT5G63090	LATERAL ORGAN BOUNDARIES	LOB	LOB	TFModule	1	PA_chr03_G000095	0.944752	3.96871e-10	0.130929
Module4	CAMTA5	3.42019e-07	1.6995	AT4G16150	NA	NA	CAMTA5	TFModule	1	PA_chr12_G003311	0.928922	8.31215e-10	0.129626
Module4	BZIP63	5.15098e-07	1.53449	AT5G28770	Arabidopsis thaliana basic leucine zipper 63	AtbZIP63-BZO2H3	BZIP63	TFModule	1	PA_chr12_G004037	0.932421	5.40953e-10	0.12865
Module7	DOF1.7	7.87819e-13	1.4451	AT1G51700	DOF zinc finger protein 1	ADOF1-DOF1	DOF1.7	TFModule	2	PA_chr06_sUL004_G000003	0.804238	1.54974e-05	0.128527
Module3	NAC105	6.24131e-10	1.48766	AT5G66300	Arabidopsis NAC domain containing protein 105	ANAC105-NAC105-VND3	VND3	TFModule	4	PA_chr07_G004032	0.858109	6.27249e-07	0.126049
Module4	Zm00001d020267	1.99335e-11	1.71977	AT4G39780	NA	NA	Zm00001d020267	TFModule	1	PA_chr03_G007243	0.815042	5.41487e-06	0.124415
Module4	ERF057	3.5141e-11	1.57557	AT5G65130	NA	NA	ERF057	TFModule	1	PA_chr03_G007243	0.815042	5.41487e-06	0.121552
Module7	HAT2	3.63135e-07	1.43761	AT5G47370	NA	HAT2	HAT2	TFModule	1	PA_chr07_G003331	0.91889	3.20774e-09	0.120765
Module4	Zm00001d027846	9.89794e-06	1.23424	AT5G39660	cycling DOF factor 2	CDF2	Zm00001d027846	TFModule	1	PA_chr03_G001950	0.952123	1.58591e-11	0.119324
Module5	MYB4	1.79599e-12	1.63592	AT4G38620	myb domain protein 4	ATMYB4-MYB4	MYB4	TFModule	3	PA_chr01_G002758	0.827489	2.65854e-05	0.118649
Module3	TGA1	1.16433e-09	1.782	AT5G65210	TGACG sequence-specific binding protein 1	TGA1	TGA1	TFModule	1	PA_chr03_G007551	0.843765	1.32226e-06	0.115953
Module3	NAC007	7.58049e-09	1.48602	AT1G12260	NAC 007	ANAC007-EMB2749-NAC007-VND4	VND4	TFModule	4	PA_chr07_G004032	0.858109	6.27249e-07	0.111199
Module3	NAC037	7.58049e-09	1.48602	AT2G18060	Arabidopsis NAC domain containing protein 37	ANAC037-VND1	VND1	TFModule	4	PA_chr07_G004032	0.858109	6.27249e-07	0.111199
Module3	NAC076	7.58049e-09	1.48602	AT4G36160	NAC domain containing protein 76	ANAC076-NAC076-VND2	VND2	TFModule	4	PA_chr07_G004032	0.858109	6.27249e-07	0.111199
Module3	NAC101	7.58049e-09	1.48602	AT5G62380	NAC-domain protein 101	ANAC101-NAC101-VND6	VND6	TFModule	4	PA_chr07_G004032	0.858109	6.27249e-07	0.111199
Module5	GLYMA19G26560	2.87611e-12	1.6483	AT3G27010	ARABIDOPSIS THALIANA TEOSINTE BRANCHED 1, CYCLOIDEA, PCF (TCP)-DOMAIN FAMILY PROTEIN 20	AT-TCP20-ATTCP20-PCF1-TCP20	GLYMA19G26560	TFModule	1	PA_chr09_G001366	0.80266	4.38254e-05	0.111051
Module5	Glyma19g26560.1	2.87611e-12	1.6483	AT3G27010	ARABIDOPSIS THALIANA TEOSINTE BRANCHED 1, CYCLOIDEA, PCF (TCP)-DOMAIN FAMILY PROTEIN 20	AT-TCP20-ATTCP20-PCF1-TCP20	Glyma19g26560.1	TFModule	1	PA_chr09_G001366	0.80266	4.38254e-05	0.111051
Module3	TGA7	2.90264e-09	1.78509	AT1G77920	TGACG sequence-specific binding protein 7	TGA7	TGA7	TFModule	1	PA_chr03_G007551	0.843765	1.32226e-06	0.110804
Module4	ERF055	3.5328e-10	1.63213	AT1G36060	NA	NA	ERF055	TFModule	1	PA_chr03_G007243	0.815042	5.41487e-06	0.109898
Module4	TGA4	1.19684e-06	1.49689	AT5G10030	OCS ELEMENT BINDING FACTOR 4	OBF4-TGA4	TGA4	TFModule	1	PA_chr06_G001995	0.909382	7.03384e-09	0.106594
Module3	Zm00001d020267	2.22655e-08	1.53002	AT4G39780	NA	NA	Zm00001d020267	TFModule	1	PA_chr03_G007243	0.862263	5.97575e-07	0.105147
Module3	ERF055	2.45216e-08	1.50416	AT1G36060	NA	NA	ERF055	TFModule	1	PA_chr03_G007243	0.862263	5.97575e-07	0.104571
Module7	ATHB-9	5.25186e-06	1.45789	AT1G30490	NA	ATHB9-PHV	ATHB-9	TFModule	1	PA_chr05_G002778	0.929031	1.0894e-09	0.104475
Module3	RAP2-4	3.81933e-08	1.53915	AT1G78080	NA	AtWIND1-RAP2.4-WIND1	RAP2-4	TFModule	1	PA_chr03_G007243	0.862263	5.97575e-07	0.101927
Module5	TCP16	8.16975e-11	1.63197	AT3G45150	TCP domain protein 16	TCP16	TCP16	TFModule	1	PA_chr09_G001366	0.80266	4.38254e-05	0.0970665
Module3	AS2	5.01472e-06	1.39508	AT1G65620	ASYMMETRIC LEAVES 2	AS2	AS2	TFModule	1	PA_chr07_G002552	0.920889	5.95816e-09	0.0962375
Module7	ATHB-4	8.61377e-06	1.39892	AT2G44910	ARABIDOPSIS THALIANA HOMEOBOX-LEUCINE ZIPPER PROTEIN 4	ATHB-4-ATHB4-HB4	ATHB-4	TFModule	1	PA_chr07_G003331	0.91889	3.20774e-09	0.0949781
Module3	IG1	6.23659e-06	1.39438	AT1G65620	ASYMMETRIC LEAVES 2	AS2	IG1	TFModule	1	PA_chr07_G002552	0.920889	5.95816e-09	0.0945178
Module4	BZIP2	9.5591e-08	1.45296	AT2G18160	basic leucine-zipper 2	ATBZIP2-bZIP2-FTM3-GBF5	BZIP2	TFModule	1	PA_chr08_G001193	0.84325	1.23702e-06	0.0915551
Module3	EREB71	2.74755e-07	1.50871	AT1G78080	NA	AtWIND1-RAP2.4-WIND1	EREB71	TFModule	1	PA_chr03_G007243	0.862263	5.97575e-07	0.0901518
Module4	BZIP44	2.27882e-07	1.47153	AT1G75390	basic leucine-zipper 44	AtbZIP44-bZIP44	BZIP44	TFModule	1	PA_chr08_G001193	0.84325	1.23702e-06	0.0866342
Module4	CDF3	0.000265663	1.30602	AT3G47500	cycling DOF factor 3	CDF3	CDF3	TFModule	1	PA_chr03_G001950	0.952123	1.58591e-11	0.0852567
Module4	TGA7	2.36006e-05	1.57658	AT1G77920	TGACG sequence-specific binding protein 7	TGA7	TGA7	TFModule	1	PA_chr06_G001995	0.909382	7.03384e-09	0.0832861
Module4	GBF2	1.52731e-06	1.3971	AT4G01120	BASIC REGION/LEUCINE ZIPPER MOTIF 5	ATBZIP54-GBF2	GBF2	TFModule	1	PA_chr11_G000067	0.864829	3.54735e-07	0.0828237
Module3	ANL2	6.81035e-10	1.45191	AT4G00730	ARABIDOPSIS THALIANA HOMEODOMAIN PROTEIN	AHDP-ANL2	ANL2	TFModule	1	PA_chr03_G002704	0.74719	9.86953e-05	0.0810693
Module5	MYB61	2.05921e-11	1.62573	AT1G09540	ARABIDOPSIS THALIANA MYB DOMAIN PROTEIN 61	ATMYB61-MYB61	MYB61	TFModule	3	PA_chr08_G001160	0.746906	0.000406423	0.0800049
Module3	SOC1	1.16363e-08	1.34194	AT2G45660	AGAMOUS-like 20	AGL20-ATSOC1-SOC1	SOC1	TFModule	1	PA_chr01_G000472	0.778268	3.22655e-05	0.0786736
Module3	NAC075	8.84851e-09	1.53591	AT4G29230	NAC domain containing protein 75	anac075-NAC075	NAC075	TFModule	2	PA_chr06_G001015	0.772807	3.77971e-05	0.0786313
Module4	TGA5	2.66103e-05	1.55344	AT5G06960	OCS-element binding factor 5	OBF5-TGA5	TGA5	TFModule	1	PA_chr04_G000999	0.900353	1.65003e-08	0.0786076
Module4	RAP2-4	1.74848e-07	1.55017	AT1G78080	NA	AtWIND1-RAP2.4-WIND1	RAP2-4	TFModule	1	PA_chr03_G007243	0.815042	5.41487e-06	0.0785686
Module3	HSFB2B	3.06382e-06	1.39986	AT4G11660	NA	AT-HSFB2B-HSF7-HSFB2B	HSFB2B	TFModule	1	PA_chr11_sUL001_G000007	0.869204	5.46681e-07	0.0762318
Module3	HDG7	2.70783e-09	1.42182	AT5G52170	homeodomain GLABROUS 7	HDG7	HDG7	TFModule	1	PA_chr03_G002704	0.74719	9.86953e-05	0.0757679
Module3	ERF057	3.13969e-06	1.35171	AT5G65130	NA	NA	ERF057	TFModule	1	PA_chr03_G007243	0.862263	5.97575e-07	0.0756152
Module4	GBF3	5.05513e-06	1.42081	AT2G46270	G-box binding factor 3	GBF3	GBF3	TFModule	1	PA_chr11_G000067	0.864829	3.54735e-07	0.0754214
Module5	TCP20	1.46915e-08	1.6534	AT3G27010	ARABIDOPSIS THALIANA TEOSINTE BRANCHED 1, CYCLOIDEA, PCF (TCP)-DOMAIN FAMILY PROTEIN 20	AT-TCP20-ATTCP20-PCF1-TCP20	TCP20	TFModule	1	PA_chr09_G001366	0.80266	4.38254e-05	0.0753699
Module1	E2FD	0.000152505	1.3828	AT5G14960	DP-E2F-like 2	DEL2-E2FD-E2L1	E2FD	TFModule	1	PA_chr07_G002423	0.931323	1.51093e-09	0.0743283
Module1	E2FE	0.000152505	1.3828	AT3G48160	DP-E2F-like 1	DEL1-E2FE-E2L3	E2FE	TFModule	1	PA_chr07_G002423	0.931323	1.51093e-09	0.0743283
Module7	GTL1	3.49641e-07	1.53684	AT1G33240	GT2-LIKE 1	AT-GTL1-ATGTL1-GTL1	GTL1	TFModule	1	PA_chr11_G002247	0.827048	7.4709e-06	0.0730768
Module4	BZIP68	1.14809e-07	1.46749	AT1G32150	NA	AtbZIP68-bZIP68	BZIP68	TFModule	1	PA_chr07_G003179	0.785329	1.91386e-05	0.0722913
Module3	HDG1	6.90877e-09	1.43403	AT3G61150	HOMEODOMAIN-GLABRA2 1	HD-GL2-1-HDG1	HDG1	TFModule	1	PA_chr03_G002704	0.74719	9.86953e-05	0.0721705
Module4	CDF2	0.000946726	1.24058	AT5G39660	cycling DOF factor 2	CDF2	CDF2	TFModule	1	PA_chr03_G001950	0.952123	1.58591e-11	0.0720976
Module3	HSFB2A	6.59667e-06	1.38949	AT5G62020	ARABIDOPSIS THALIANA HEAT SHOCK TRANSCRIPTION FACTOR B2A	AT-HSFB2A-HSFB2A	HSFB2A	TFModule	1	PA_chr11_sUL001_G000007	0.869204	5.46681e-07	0.071627
Module4	MYB4	1.55231e-05	1.37697	AT4G38620	myb domain protein 4	ATMYB4-MYB4	MYB4	TFModule	3	PA_chr12_G002840	0.871435	2.26845e-07	0.0705444
Module1	MYB44	2.179e-07	1.73233	AT5G67300	ARABIDOPSIS THALIANA MYB DOMAIN PROTEIN 44	ATMYB44-ATMYBR1-MYB44-MYBR1	MYB44	TFModule	2	PA_chr06_G003201	0.784659	1.7822e-05	0.0698478
Module3	LBD13	6.41061e-08	1.53637	AT2G30340	LOB domain-containing protein 13	LBD13	LBD13	TFModule	1	PA_chr06_G003955	0.768262	4.54166e-05	0.0689673
Module5	SVP	2.08767e-06	1.31508	AT2G22540	AGAMOUS-like 22	AGL22-FAQ1-SVP	SVP	TFModule	1	PA_chr07_G003649	0.87267	4.08579e-06	0.0675801
Module7	bHLH77	1.08361e-06	1.52634	AT3G23690	NA	NA	bHLH77	TFModule	1	PA_chr12_G002259	0.826633	7.4709e-06	0.0675165
Module7	DOF1.6	4.43318e-07	1.43442	AT1G47655	NA	NA	DOF1.6	TFModule	2	PA_chr06_sUL004_G000003	0.804238	1.54974e-05	0.067465
Module4	bZIP910	6.83735e-06	1.88422	AT3G62420	basic region/leucine zipper motif 53	ATBZIP53-BZIP53	bZIP910	TFModule	1	PA_chr08_G001193	0.84325	1.23702e-06	0.0673676
Module7	DOF5.4	7.07318e-07	1.40903	AT5G60850	OBF binding protein 4	OBP4	DOF5.4	TFModule	1	PA_chr06_sUL004_G000003	0.804238	1.54974e-05	0.0653104
Module4	TGA2	0.000187559	1.51675	AT5G06950	NA	AHBP-1B-TGA2	TGA2	TFModule	1	PA_chr04_G000999	0.900353	1.65003e-08	0.0640356
Module7	BIM1	0.000137084	1.61275	AT5G08130	NA	BIM1	BIM1	TFModule	1	PA_chr02_cUL0065_G000011	0.897473	3.83654e-08	0.0632496
Module4	O2	0.000897218	1.24992	AT4G02640	Arabidopsis thaliana basic leucine zipper 10	ATBZIP10-BZO2H1	O2	TFModule	1	PA_chr12_G004037	0.932421	5.40953e-10	0.0623415
Module3	Zm00001d024644	2.45216e-08	1.49574	AT5G47390	MYB hypocotyl elongation-related	MYBH	Zm00001d024644	TFModule	1	PA_chr12_G002131	0.715913	0.000208519	0.0618469
Module4	Zm00001d024644	3.71088e-06	1.43923	AT5G47390	MYB hypocotyl elongation-related	MYBH	Zm00001d024644	TFModule	1	PA_chr12_G002131	0.807733	7.57613e-06	0.0613928
Module4	Zm00001d052229	5.535e-06	1.52363	AT1G78080	NA	AtWIND1-RAP2.4-WIND1	Zm00001d052229	TFModule	1	PA_chr03_G007243	0.815042	5.41487e-06	0.0611226
Module7	MYB3R4	1.42402e-07	1.73917	AT5G11510	myb domain protein 3R4	AtMYB3R4-MYB3R-4	MYB3R4	TFModule	4	PA_chr07_G001634	0.751849	0.000108329	0.0599373
Module3	WRKY42	2.5023e-06	1.47778	AT4G04450	NA	AtWRKY42-WRKY42	WRKY42	TFModule	1	PA_chr05_G003418	0.79525	1.58981e-05	0.0593465
Module3	WRKY6	2.5023e-06	1.47778	AT1G62300	NA	ATWRKY6-WRKY6	WRKY6	TFModule	1	PA_chr05_G003418	0.79525	1.58981e-05	0.0593465
Module4	BZIP11	2.81881e-05	1.38674	AT4G34590	NA	ATB2-AtbZIP11-BZIP11-GBF6	BZIP11	TFModule	1	PA_chr08_G001193	0.84325	1.23702e-06	0.059344
Module4	BZIP53	2.95047e-05	1.39433	AT3G62420	basic region/leucine zipper motif 53	ATBZIP53-BZIP53	BZIP53	TFModule	1	PA_chr08_G001193	0.84325	1.23702e-06	0.0590854
Module5	ARALYDRAFT_484486	7.36374e-07	1.45019	AT3G27010	ARABIDOPSIS THALIANA TEOSINTE BRANCHED 1, CYCLOIDEA, PCF (TCP)-DOMAIN FAMILY PROTEIN 20	AT-TCP20-ATTCP20-PCF1-TCP20	ARALYDRAFT_484486	TFModule	1	PA_chr09_G001366	0.80266	4.38254e-05	0.0590118
Module3	TGA1A	3.24086e-05	1.74478	AT5G65210	TGACG sequence-specific binding protein 1	TGA1	TGA1A	TFModule	1	PA_chr03_G007551	0.843765	1.32226e-06	0.0582668
Module5	MYB3	1.9308e-06	1.51419	AT1G22640	ARABIDOPSIS THALIANA MYB DOMAIN PROTEIN 3	ATMYB3-MYB3	MYB3	TFModule	2	PA_chr01_G002758	0.827489	2.65854e-05	0.0577223
Module3	WRKY31	3.63532e-06	1.45411	AT4G22070	NA	ATWRKY31-WRKY31	WRKY31	TFModule	1	PA_chr05_G003418	0.79525	1.58981e-05	0.057628
Module3	ASIL2	4.24342e-07	1.60438	AT3G14180	Arabidopsis 6B-interacting protein 1-like 2	ASIL2	ASIL2	TFModule	1	PA_chr08_G005530	0.752369	8.44428e-05	0.0573079
Module4	At3g11280	9.89272e-06	1.30807	AT3G11280	NA	NA	At3g11280	TFModule	1	PA_chr09_cUL0038_G000001	0.806146	7.57613e-06	0.0565786
Module11	BZIP2	1.10329e-05	1.49616	AT2G18160	basic leucine-zipper 2	ATBZIP2-bZIP2-FTM3-GBF5	BZIP2	TFModule	1	PA_chr04_G001758	0.831603	7.48285e-06	0.0561019
Module1	MYB73	5.7909e-06	1.64668	AT4G37260	NA	ATMYB73-MYB73	MYB73	TFModule	1	PA_chr06_G003201	0.784659	1.7822e-05	0.0549121
Module1	MYB73	5.7909e-06	1.64668	AT4G37260	NA	ATMYB73-MYB73	MYB73	TFModule	1	PA_chr06_G003201	0.784659	1.7822e-05	0.0549121
Module3	WRKY12	0.00073161	1.35801	AT2G44745	NA	AtWRKY12-WRKY12	WRKY12	TFModule	1	PA_chr07_G006247	0.911378	1.53978e-08	0.0540864
Module7	SPL8	1.95315e-07	1.55972	AT1G02065	squamosa promoter binding protein-like 8	SPL8	SPL8	TFModule	1	PA_chr07_G001533	0.727246	0.000228609	0.0539316
Module4	PHL2	0.000142668	1.35512	AT3G24120	NA	NA	PHL2	TFModule	1	PA_chr12_G001438	0.860673	4.70506e-07	0.0537228
Module7	ZHD1	7.03668e-07	1.51026	AT5G65410	ARABIDOPSIS THALIANA HOMEOBOX PROTEIN 25	ATHB25-HB25-ZFHD2-ZHD1	ZHD1	TFModule	1	PA_chr09_G003036	0.75022	0.000113138	0.0536068
Module7	SOC1	2.2504e-07	1.36134	AT2G45660	AGAMOUS-like 20	AGL20-ATSOC1-SOC1	SOC1	TFModule	1	PA_chr01_G000869	0.727179	0.000228609	0.053437
Module11	SMB	0.000595488	1.38539	AT1G79580	Arabidopsis NAC domain containing protein 33	ANAC033-SMB-URP7	SMB	TFModule	1	PA_chr11_G001721	0.904183	3.64443e-08	0.0529643
Module4	IG1	4.55223e-07	1.48806	AT1G65620	ASYMMETRIC LEAVES 2	AS2	IG1	TFModule	1	PA_chr07_G002552	0.729214	0.000167773	0.052859
Module4	AT5G05790	2.62036e-05	1.29185	AT5G05790	NA	NA	AT5G05790	TFModule	1	PA_chr09_cUL0038_G000001	0.806146	7.57613e-06	0.051796
Module7	HSFA6A	1.30938e-06	1.47761	AT5G43840	heat shock transcription factor A6A	AT-HSFA6A-HSFA6A	HSFA6A	TFModule	1	PA_chr06_G001555	0.747971	0.00011852	0.0509948
Module5	NAC075	7.74827e-06	1.4281	AT4G29230	NAC domain containing protein 75	anac075-NAC075	NAC075	TFModule	2	PA_chr05_G001529	0.804239	4.38254e-05	0.049177
Module4	KUA1	4.73792e-05	1.43257	AT5G47390	MYB hypocotyl elongation-related	MYBH	KUA1	TFModule	1	PA_chr12_G002131	0.807733	7.57613e-06	0.048888
Module4	BEH4	4.48846e-06	1.52768	AT1G78700	BES1/BZR1 homolog 4	BEH4	BEH4	TFModule	1	PA_chr06_G003574	0.748962	8.18491e-05	0.0482553
Module4	BZIP16	2.61944e-05	1.35719	AT2G35530	NA	AtbZIP16-bZIP16	BZIP16	TFModule	1	PA_chr07_G003179	0.785329	1.91386e-05	0.0477266
Module11	BRN2	0.00124634	1.40389	AT4G10350	NAC domain containing protein 70	ANAC070-BRN2-NAC070	BRN2	TFModule	4	PA_chr11_G001721	0.904183	3.64443e-08	0.0476966
Module11	ENAP2	1.16115e-05	1.74326	AT5G05550	NA	NA	ENAP2	TFModule	1	PA_chr08_G005530	0.775544	6.17849e-05	0.0458613
Module4	bZIP911	0.000309379	1.33178	AT3G62420	basic region/leucine zipper motif 53	ATBZIP53-BZIP53	bZIP911	TFModule	1	PA_chr08_G001193	0.84325	1.23702e-06	0.0457739
Module11	ASIL2	1.25988e-05	1.762	AT3G14180	Arabidopsis 6B-interacting protein 1-like 2	ASIL2	ASIL2	TFModule	1	PA_chr08_G005530	0.775544	6.17849e-05	0.045532
Module13	MYR2	0.00512175	1.44941	AT3G04030	NA	MYR2	MYR2	TFModule	1	PA_chr03_G006965	0.939748	1.04929e-09	0.0454085
Module1	GLYMA19G26560	0.000447187	1.35671	AT3G27010	ARABIDOPSIS THALIANA TEOSINTE BRANCHED 1, CYCLOIDEA, PCF (TCP)-DOMAIN FAMILY PROTEIN 20	AT-TCP20-ATTCP20-PCF1-TCP20	GLYMA19G26560	TFModule	1	PA_chr06_G001924	0.858523	7.5078e-07	0.0452908
Module1	Glyma19g26560.1	0.000447187	1.35671	AT3G27010	ARABIDOPSIS THALIANA TEOSINTE BRANCHED 1, CYCLOIDEA, PCF (TCP)-DOMAIN FAMILY PROTEIN 20	AT-TCP20-ATTCP20-PCF1-TCP20	Glyma19g26560.1	TFModule	1	PA_chr06_G001924	0.858523	7.5078e-07	0.0452908
Module3	ARR14	5.88764e-05	1.51968	AT2G01760	response regulator 14	ARR14-RR14	ARR14	TFModule	1	PA_chr11_sUL001_G000008	0.799759	1.41795e-05	0.0452791
Module7	HSFA6B	6.12417e-06	1.45009	AT3G22830	ARABIDOPSIS THALIANA HEAT SHOCK TRANSCRIPTION FACTOR A6B	AT-HSFA6B-HSFA6B	HSFA6B	TFModule	1	PA_chr06_G001555	0.747971	0.00011852	0.0451872
Module4	CAMTA1	1.46855e-05	1.6438	AT5G09410	calmodulin-binding transcription activator 1	CAMTA1-EICBP.B	CAMTA1	TFModule	1	PA_chr03_G000240	0.756237	6.26598e-05	0.0448483
Module3	WRKY47	6.08034e-05	1.3521	AT4G01720	NA	AtWRKY47-WRKY47	WRKY47	TFModule	1	PA_chr05_G003418	0.79525	1.58981e-05	0.0446669
Module7	BHLH122	1.66951e-05	1.46656	AT1G51140	ABA-responsive kinase substrate 1	AKS1-FBH3	BHLH122	TFModule	1	PA_chr09_G002982	0.768449	6.38113e-05	0.044248
Module4	EREB71	0.000192178	1.38763	AT1G78080	NA	AtWIND1-RAP2.4-WIND1	EREB71	TFModule	1	PA_chr03_G007243	0.815042	5.41487e-06	0.04321
Module3	ENAP2	1.63889e-05	1.48475	AT5G05550	NA	NA	ENAP2	TFModule	1	PA_chr08_G005530	0.752369	8.44428e-05	0.043037
Module11	BZIP11	0.000162089	1.46013	AT4G34590	NA	ATB2-AtbZIP11-BZIP11-GBF6	BZIP11	TFModule	1	PA_chr04_G001758	0.831603	7.48285e-06	0.0428942
Module11	BZIP53	0.000162415	1.47032	AT3G62420	basic region/leucine zipper motif 53	ATBZIP53-BZIP53	BZIP53	TFModule	1	PA_chr04_G001758	0.831603	7.48285e-06	0.0428844
Module3	Gam1	1.46438e-05	1.43742	AT5G06100	NA	ATMYB33-MYB33	Gam1	TFModule	1	PA_chr03_G008015	0.73905	0.000106156	0.0424161
Module7	bHLH80	2.78112e-05	1.35515	AT1G35460	FLOWERING BHLH 1	FBH1	bHLH80	TFModule	1	PA_chr09_G002982	0.768449	6.38113e-05	0.0421953
Module4	AS2	9.97665e-06	1.41834	AT1G65620	ASYMMETRIC LEAVES 2	AS2	AS2	TFModule	1	PA_chr07_G002552	0.729214	0.000167773	0.0416837
Module7	GT-2	5.1983e-06	1.40895	AT1G76890	NA	AT-GT2-GT2	GT-2	TFModule	1	PA_chr02_G003277	0.720583	0.000279674	0.0414544
Module4	AT5G04760	0.0002246	1.43846	AT5G04760	NA	NA	AT5G04760	TFModule	1	PA_chr09_cUL0038_G000001	0.806146	7.57613e-06	0.0412478
Module4	TGA1A	0.00522098	1.51486	AT5G65210	TGACG sequence-specific binding protein 1	TGA1	TGA1A	TFModule	1	PA_chr06_G001995	0.909382	7.03384e-09	0.0410798
Module11	BZIP44	0.000240694	1.42754	AT1G75390	basic leucine-zipper 44	AtbZIP44-bZIP44	BZIP44	TFModule	1	PA_chr04_G001758	0.831603	7.48285e-06	0.040951
Module4	TGA3	0.00541701	1.32202	AT1G22070	TGA1A-related gene 3	TGA3	TGA3	TFModule	1	PA_chr06_G001995	0.909382	7.03384e-09	0.0407917
Module4	SRM1	0.000287621	1.32747	AT5G08520	NA	NA	SRM1	TFModule	1	PA_chr09_cUL0038_G000001	0.806146	7.57613e-06	0.0400335
Module7	E2FD	5.4013e-05	1.38111	AT5G14960	DP-E2F-like 2	DEL2-E2FD-E2L1	E2FD	TFModule	1	PA_chr07_G002423	0.771976	6.13183e-05	0.0396883
Module7	E2FE	5.4013e-05	1.38111	AT3G48160	DP-E2F-like 1	DEL1-E2FE-E2L3	E2FE	TFModule	1	PA_chr07_G002423	0.771976	6.13183e-05	0.0396883
Module11	SPL15	6.53475e-05	1.87153	AT3G57920	squamosa promoter binding protein-like 15	SPL15	SPL15	TFModule	1	PA_chr05_G002476	0.785031	5.08499e-05	0.0396701
Module7	ERF017	3.78565e-05	1.46703	AT1G19210	NA	NA	ERF017	TFModule	1	PA_chr12_G003802	0.756643	9.54869e-05	0.039246
Module13	NAC058	0.00354994	1.57937	AT3G18400	NAC domain containing protein 58	anac058-NAC058	NAC058	TFModule	1	PA_chr09_G001778	0.889081	6.99005e-08	0.0387014
Module13	NAC087	0.00354994	1.58913	AT5G18270	Arabidopsis NAC domain containing protein 87	ANAC087	NAC087	TFModule	1	PA_chr09_G001778	0.889081	6.99005e-08	0.0387014
Module11	MYB83	0.000387621	1.33476	AT3G08500	myb domain protein 83	AtMYB83-MYB83	MYB83	TFModule	4	PA_chr09_G004772	0.822738	1.09057e-05	0.0373769
Module4	Gam1	0.000272351	1.39559	AT5G06100	NA	ATMYB33-MYB33	Gam1	TFModule	1	PA_chr03_G008015	0.78613	1.91065e-05	0.0371395
Module1	ARALYDRAFT_484486	0.00200403	1.32	AT3G27010	ARABIDOPSIS THALIANA TEOSINTE BRANCHED 1, CYCLOIDEA, PCF (TCP)-DOMAIN FAMILY PROTEIN 20	AT-TCP20-ATTCP20-PCF1-TCP20	ARALYDRAFT_484486	TFModule	1	PA_chr06_G001924	0.858523	7.5078e-07	0.0364826
Module4	BEH3	0.000118712	1.41698	AT4G18890	BES1/BZR1 homolog 3	BEH3	BEH3	TFModule	1	PA_chr06_G003574	0.748962	8.18491e-05	0.0354207
Module7	HAT22	0.000102903	1.30669	AT4G37790	NA	HAT22	HAT22	TFModule	1	PA_chr04_G003641	0.757968	9.54869e-05	0.0353915
Module3	KUA1	4.61975e-05	1.39322	AT5G47390	MYB hypocotyl elongation-related	MYBH	KUA1	TFModule	1	PA_chr12_G002131	0.715913	0.000208519	0.0352318
Module7	BHLH49	0.000224286	1.41368	AT1G68920	NA	NA	BHLH49	TFModule	1	PA_chr06_G004154	0.782551	4.29463e-05	0.0351841
Module4	AT2G38090	0.000773921	1.25474	AT2G38090	NA	NA	AT2G38090	TFModule	1	PA_chr09_cUL0038_G000001	0.806146	7.57613e-06	0.0351737
Module7	ERF018	0.000125558	1.46117	AT1G74930	NA	ORA47	ERF018	TFModule	1	PA_chr12_G003802	0.756643	9.54869e-05	0.0346245
Module7	PC-MYB1	0.000139206	1.53223	AT4G32730	NA	ATMYB3R-1-ATMYB3R1-MYB3R-1-MYB3R1-PC-MYB1	PC-MYB1	TFModule	3	PA_chr07_G001634	0.751849	0.000108329	0.0337602
Module7	MYB3R1	0.000139261	1.57977	AT4G32730	NA	ATMYB3R-1-ATMYB3R1-MYB3R-1-MYB3R1-PC-MYB1	MYB3R1	TFModule	2	PA_chr07_G001634	0.751849	0.000108329	0.0337587
Module13	NAC054	0.00778978	1.55372	AT3G15170	Arabidopsis NAC domain containing protein 54	ANAC054-ATNAC1-CUC1	NAC054	TFModule	1	PA_chr09_G001778	0.889081	6.99005e-08	0.0333095
Module7	bHLH130	0.000257359	1.32099	AT2G42280	ABA-responsive kinase substrate 3	AKS3-FBH4	bHLH130	TFModule	1	PA_chr09_G002982	0.768449	6.38113e-05	0.0332453
Module4	TGA6	0.0125614	1.22131	AT3G12250	NA	BZIP45-TGA6	TGA6	TFModule	1	PA_chr04_G000999	0.900353	1.65003e-08	0.0326627
Module5	MYB55	4.70448e-05	1.45061	AT4G01680	myb domain protein 55	AtMYB55-MYB55	MYB55	TFModule	2	PA_chr08_G001160	0.746906	0.000406423	0.0323985
Module13	NAC031	0.00898819	1.49971	AT1G76420	Arabidopsis NAC domain containing protein 31	ANAC031-CUC3-NAC368	NAC031	TFModule	1	PA_chr09_G001778	0.889081	6.99005e-08	0.0323277
Module7	DF1	9.19381e-05	1.37103	AT1G76880	NA	NA	DF1	TFModule	1	PA_chr02_G003277	0.720583	0.000279674	0.0316666
Module11	SPL5	0.000562427	1.69975	AT3G15270	squamosa promoter binding protein-like 5	SPL5	SPL5	TFModule	1	PA_chr05_G002476	0.785031	5.08499e-05	0.0308082
Module7	Os05g0497200	0.000528225	1.4148	AT1G28360	ERF DOMAIN PROTEIN 12	ATERF12-ERF12	Os05g0497200	TFModule	1	PA_chr10_G002651	0.772573	6.13183e-05	0.0304782
Module4	MYB3	0.00879198	1.2646	AT1G22640	ARABIDOPSIS THALIANA MYB DOMAIN PROTEIN 3	ATMYB3-MYB3	MYB3	TFModule	2	PA_chr12_G002840	0.871435	2.26845e-07	0.0301586
Module11	NAC066	0.0152979	1.31928	AT3G61910	NA	NA	NST2	TFModule	4	PA_chr11_G001721	0.904183	3.64443e-08	0.0298127
Module4	MYC4	0.000255681	1.40544	AT4G17880	NA	MYC4	MYC4	TFModule	1	PA_chr11_G002009	0.725418	0.000187275	0.0295632
Module1	TCX6	0.000249977	1.22449	AT2G20110	NA	NA	TCX6	TFModule	1	PA_chr07_G000146	0.715719	0.000195563	0.0294943
Module11	EIL4	0.000783063	1.30387	AT3G20770	NA	AtEIN3-EIN3	EIL4	TFModule	1	PA_chr01_G007317	0.778327	5.86741e-05	0.0290194
Module3	WRKY2	0.00170927	1.40097	AT5G56270	ARABIDOPSIS THALIANA WRKY DNA-BINDING PROTEIN 2	ATWRKY2-WRKY2	WRKY2	TFModule	1	PA_chr12_G000828	0.789628	2.03196e-05	0.0286658
Module4	WRKY24	0.00255702	1.25179	AT5G41570	ARABIDOPSIS THALIANA WRKY DNA-BINDING PROTEIN 24	ATWRKY24-WRKY24	WRKY24	TFModule	1	PA_chr02_G001107	0.798353	1.09824e-05	0.028383
Module1	MYB70	0.00200403	1.60698	AT2G23290	myb domain protein 70	AtMYB70-MYB70	MYB70	TFModule	2	PA_chr06_G003201	0.784659	1.7822e-05	0.0282893
Module1	MYB70	0.00200403	1.60698	AT2G23290	myb domain protein 70	AtMYB70-MYB70	MYB70	TFModule	2	PA_chr06_G003201	0.784659	1.7822e-05	0.0282893
Module7	PHYPA_011264	0.000719137	1.38588	AT5G21960	NA	NA	PHYPA_011264	TFModule	1	PA_chr12_G003802	0.756643	9.54869e-05	0.0278972
Module4	ENAP2	0.00153285	1.37602	AT5G05550	NA	NA	ENAP2	TFModule	1	PA_chr08_G005530	0.770317	3.52311e-05	0.0276707
Module4	WRKY12	0.00517896	1.3163	AT2G44745	NA	AtWRKY12-WRKY12	WRKY12	TFModule	1	PA_chr07_G006247	0.826746	3.47805e-06	0.0275471
Module4	NAC047	0.000278634	1.4112	AT3G04070	NAC domain containing protein 47	anac047-NAC047	NAC047	TFModule	1	PA_chr02_G004707	0.703657	0.00033206	0.0273037
Module13	ATHB-13	0.00087345	1.50269	AT1G69780	NA	ATHB13	ATHB-13	TFModule	1	PA_chr10_G000686	0.741251	9.36153e-05	0.027206
Module4	HSFB2B	0.000367418	1.3222	AT4G11660	NA	AT-HSFB2B-HSF7-HSFB2B	HSFB2B	TFModule	1	PA_chr08_G007115	0.712858	0.000276355	0.0269858
Module11	SBP6	0.00170067	1.36297	AT2G42200	NA	AtSPL9-SPL9	SBP6	TFModule	1	PA_chr05_G002476	0.785031	5.08499e-05	0.0262527
Module11	SPL9	0.00182469	1.84128	AT2G42200	NA	AtSPL9-SPL9	SPL9	TFModule	1	PA_chr05_G002476	0.785031	5.08499e-05	0.0259629
Module1	TCP16	0.0120421	1.26902	AT3G45150	TCP domain protein 16	TCP16	TCP16	TFModule	1	PA_chr06_G001924	0.858523	7.5078e-07	0.025952
Module4	LBD13	0.00330054	1.29276	AT2G30340	LOB domain-containing protein 13	LBD13	LBD13	TFModule	1	PA_chr06_G003955	0.783219	2.05803e-05	0.025675
Module11	bZIP911	0.00566117	1.31267	AT3G62420	basic region/leucine zipper motif 53	ATBZIP53-BZIP53	bZIP911	TFModule	1	PA_chr04_G001758	0.831603	7.48285e-06	0.0254304
Module13	ATHB-20	0.00138712	1.42659	AT3G01220	homeobox protein 20	ATHB20-HB20	ATHB-20	TFModule	1	PA_chr10_G000686	0.741251	9.36153e-05	0.0254193
Module4	NAC094	0.00517896	1.38841	AT5G39820	NAC domain containing protein 94	anac094-NAC094	NAC094	TFModule	1	PA_chr06_G001529	0.799817	1.03859e-05	0.0251494
Module3	MYB33	0.00152295	1.41114	AT5G06100	NA	ATMYB33-MYB33	MYB33	TFModule	1	PA_chr03_G008015	0.73905	0.000106156	0.0247188
Module1	ERF039	0.00521182	1.35628	AT4G16750	NA	NA	ERF039	TFModule	1	PA_chr07_G000899	0.792526	1.36824e-05	0.0245158
Module20	GBF2	0.00217791	1.73637	AT4G01120	BASIC REGION/LEUCINE ZIPPER MOTIF 5	ATBZIP54-GBF2	GBF2	TFModule	1	PA_chr11_G000067	0.765743	6.99388e-05	0.0244208
Module20	BZIP2	0.00447184	1.68026	AT2G18160	basic leucine-zipper 2	ATBZIP2-bZIP2-FTM3-GBF5	BZIP2	TFModule	1	PA_chr08_G001193	0.802215	2.13659e-05	0.0242259
Module13	HAT5	0.00087345	1.61479	AT3G01470	homeobox 1	ATHB-1-ATHB1-HAT5-HB-1-HD-ZIP-1	HAT5	TFModule	1	PA_chr10_G002875	0.700782	0.000288687	0.0239032
Module4	ASIL2	0.00401504	1.34633	AT3G14180	Arabidopsis 6B-interacting protein 1-like 2	ASIL2	ASIL2	TFModule	1	PA_chr08_G005530	0.770317	3.52311e-05	0.0235593
Module13	HHO6	0.00517016	1.5038	AT1G49560	NA	NA	HHO6	TFModule	1	PA_chr06_G001506	0.791123	2.26427e-05	0.0234488
Module13	NAC020	0.00354994	1.53503	AT1G54330	NAC domain containing protein 20	ANAC020-NAC020	NAC020	TFModule	1	PA_chr04_G000734	0.765723	4.70907e-05	0.0234034
Module4	EIL4	0.000946726	1.2293	AT3G20770	NA	AtEIN3-EIN3	EIL4	TFModule	1	PA_chr01_G004914	0.704876	0.000330779	0.0232351
Module11	MYB46	0.00812495	1.30946	AT5G12870	MYB DOMAIN PROTEIN 46	ATMYB46-MYB46	MYB46	TFModule	4	PA_chr09_G004772	0.822738	1.09057e-05	0.0228997
Module13	SPL8	0.0387245	1.3864	AT1G02065	squamosa promoter binding protein-like 8	SPL8	SPL8	TFModule	1	PA_chr07_G001533	0.903714	6.40952e-08	0.0224243
Module13	NAC038	0.039288	1.42397	AT2G24430	NAC domain containing protein 38	ANAC038-ANAC039-NAC038	NAC038	TFModule	1	PA_chr09_G001778	0.889081	6.99005e-08	0.0222078
Module11	bZIP910	0.0110037	1.57548	AT3G62420	basic region/leucine zipper motif 53	ATBZIP53-BZIP53	bZIP910	TFModule	1	PA_chr04_G001758	0.831603	7.48285e-06	0.0221639
Module5	bHLH77	0.00280471	1.27195	AT3G23690	NA	NA	bHLH77	TFModule	1	PA_chr01_G006297	0.779017	0.000118369	0.0221255
Module4	AT1G76870	0.00604748	1.24886	AT1G76870	NA	NA	AT1G76870	TFModule	1	PA_chr09_G003455	0.773978	3.08965e-05	0.0220896
Module4	MYC2	0.00217345	1.39196	AT1G32640	NA	ATMYC2-JAI1-JIN1-MYC2-RD22BP1-ZBF1	MYC2	TFModule	1	PA_chr11_G002009	0.725418	0.000187275	0.0219142
Module13	HAT22	0.00354994	1.44863	AT4G37790	NA	HAT22	HAT22	TFModule	1	PA_chr04_G003641	0.736345	0.000107474	0.0214651
Module4	HSFB2A	0.00199209	1.27984	AT5G62020	ARABIDOPSIS THALIANA HEAT SHOCK TRANSCRIPTION FACTOR B2A	AT-HSFB2A-HSFB2A	HSFB2A	TFModule	1	PA_chr08_G007115	0.712858	0.000276355	0.021218
Module1	ERF091	0.0115535	1.27398	AT2G44940	NA	NA	ERF091	TFModule	1	PA_chr07_G000899	0.792526	1.36824e-05	0.0208033
Module20	KUA1	0.0267212	1.59861	AT5G47390	MYB hypocotyl elongation-related	MYBH	KUA1	TFModule	1	PA_chr12_G002131	0.855281	2.03607e-06	0.0197666
Module20	BZIP44	0.012416	1.60919	AT1G75390	basic leucine-zipper 44	AtbZIP44-bZIP44	BZIP44	TFModule	1	PA_chr08_G001193	0.802215	2.13659e-05	0.019653
Module13	GAF1	0.00512175	1.32117	AT3G50700	indeterminate(ID)-domain 2	AtIDD2-IDD2	GAF1	TFModule	1	PA_chr03_G001652	0.724453	0.000142372	0.0194527
Module20	BZIP11	0.013361	1.61552	AT4G34590	NA	ATB2-AtbZIP11-BZIP11-GBF6	BZIP11	TFModule	1	PA_chr08_G001193	0.802215	2.13659e-05	0.0193245
Module20	SOC1	0.013361	1.41883	AT2G45660	AGAMOUS-like 20	AGL20-ATSOC1-SOC1	SOC1	TFModule	1	PA_chr01_G000496	0.803423	2.13659e-05	0.0193245
Module13	ERF039	0.010816	1.54811	AT4G16750	NA	NA	ERF039	TFModule	1	PA_chr07_G000898	0.775551	3.70591e-05	0.0192327
Module4	NLP7	0.00644984	1.19804	AT4G24020	NIN like protein 7	NLP7	NLP7	TFModule	1	PA_chr04_G001556	0.742184	0.000105534	0.0192311
Module4	MYB65	0.0142752	1.37707	AT3G11440	MYB DOMAIN PROTEIN 65	ATMYB65-MYB65	MYB65	TFModule	1	PA_chr03_G008015	0.78613	1.91065e-05	0.0192259
Module4	OsEIL3	0.0034945	1.32332	AT1G73730	NA	AtEIL3-ATSLIM-EIL3-SLIM1	OsEIL3	TFModule	1	PA_chr01_G004914	0.704876	0.000330779	0.018877
Module1	PHYPADRAFT_182268	0.0174798	1.32507	AT5G11590	TINY2	TINY2	PHYPADRAFT_182268	TFModule	1	PA_chr07_G000899	0.792526	1.36824e-05	0.0188723
Module20	BZIP53	0.0154279	1.59434	AT3G62420	basic region/leucine zipper motif 53	ATBZIP53-BZIP53	BZIP53	TFModule	1	PA_chr08_G001193	0.802215	2.13659e-05	0.0186804
Module20	SRM1	0.0156277	1.56678	AT5G08520	NA	NA	SRM1	TFModule	1	PA_chr11_G003064	0.796952	2.27017e-05	0.0185177
Module4	PHL4	0.00467045	1.3287	AT2G20400	NA	NA	PHL4	TFModule	1	PA_chr09_G002921	0.716154	0.000253365	0.0185048
Module13	NAC011	0.0120833	1.43458	AT1G32510	NAC domain containing protein 11	ANAC011-NAC011	NAC011	TFModule	1	PA_chr04_G000734	0.765723	4.70907e-05	0.0183214
Module4	NAC018	0.00443078	1.32072	AT1G52880	Arabidopsis NAC domain containing protein 18	ANAC018-ATNAM-NAM-NARS2	NAC018	TFModule	1	PA_chr02_G004707	0.703657	0.00033206	0.0180761
Module11	SBP8	0.0144134	1.28566	AT2G42200	NA	AtSPL9-SPL9	SBP8	TFModule	1	PA_chr05_G002476	0.785031	5.08499e-05	0.0174542
Module11	EIL3	0.0144754	1.29033	AT1G73730	NA	AtEIL3-ATSLIM-EIL3-SLIM1	EIL3	TFModule	1	PA_chr01_G007317	0.778327	5.86741e-05	0.0171841
Module20	BZIP63	0.00678236	1.79004	AT5G28770	Arabidopsis thaliana basic leucine zipper 63	AtbZIP63-BZO2H3	BZIP63	TFModule	1	PA_chr12_G004037	0.720625	0.000295358	0.0168995
Module1	BZIP30	0.00954001	1.30991	AT2G21230	NA	NA	BZIP30	TFModule	1	PA_chr01_G001155	0.714843	0.000198225	0.0165174
Module7	OsFBH1	0.017058	1.23799	AT2G42280	ABA-responsive kinase substrate 3	AKS3-FBH4	OsFBH1	TFModule	1	PA_chr09_G002982	0.768449	6.38113e-05	0.0163758
Module11	TEIL	0.0177572	1.27053	AT3G20770	NA	AtEIN3-EIN3	TEIL	TFModule	1	PA_chr01_G007317	0.778327	5.86741e-05	0.016355
Module1	PLT1	0.037231	1.23916	AT3G20840	PLETHORA 1	PLT1	PLT1	TFModule	1	PA_chr07_G000171	0.813219	7.03301e-06	0.016258
Module4	PHL1	0.00915183	1.22987	AT5G29000	PHR1-like 1	PHL1	PHL1	TFModule	1	PA_chr09_G002921	0.716154	0.000253365	0.0161852
Module11	WRKY12	0.0222708	1.31184	AT2G44745	NA	AtWRKY12-WRKY12	WRKY12	TFModule	1	PA_chr07_G006247	0.789088	5.08499e-05	0.0156629
Module20	O2	0.00985491	1.54218	AT4G02640	Arabidopsis thaliana basic leucine zipper 10	ATBZIP10-BZO2H1	O2	TFModule	1	PA_chr12_G004037	0.720625	0.000295358	0.015635
Module20	bZIP911	0.0308313	1.50213	AT3G62420	basic region/leucine zipper motif 53	ATBZIP53-BZIP53	bZIP911	TFModule	1	PA_chr08_G001193	0.802215	2.13659e-05	0.01558
Module1	AIL6	0.0485768	1.22507	AT5G10510	AINTEGUMENTA-like 6	AIL6-PLT3	AIL6	TFModule	1	PA_chr07_G000171	0.813219	7.03301e-06	0.0149438
Module20	BEH4	0.0308509	1.60575	AT1G78700	BES1/BZR1 homolog 4	BEH4	BEH4	TFModule	1	PA_chr06_G003574	0.78574	3.32496e-05	0.0149366
Module20	Zm00001d027846	0.0119902	1.35674	AT5G39660	cycling DOF factor 2	CDF2	Zm00001d027846	TFModule	1	PA_chr03_G001950	0.714741	0.000343614	0.0146924
Module1	ERF037	0.0453741	1.25401	AT1G77200	NA	NA	ERF037	TFModule	1	PA_chr07_G000899	0.792526	1.36824e-05	0.0144237
Module20	NAC075	0.0137913	1.62902	AT4G29230	NAC domain containing protein 75	anac075-NAC075	NAC075	TFModule	2	PA_chr06_G001015	0.704007	0.000469672	0.0136702
Module20	AT5G05790	0.0480001	1.32981	AT5G05790	NA	NA	AT5G05790	TFModule	1	PA_chr11_G003064	0.796952	2.27017e-05	0.0135211
Module11	OsEIL3	0.0388826	1.26455	AT1G73730	NA	AtEIL3-ATSLIM-EIL3-SLIM1	OsEIL3	TFModule	1	PA_chr01_G007317	0.778327	5.86741e-05	0.0131751
Module13	IDD1	0.0297644	1.30967	AT5G66730	ENHYDROUS	ENY-IDD1	IDD1	TFModule	1	PA_chr03_G001652	0.724453	0.000142372	0.0129621
Module13	bHLH80	0.0413966	1.31324	AT1G35460	FLOWERING BHLH 1	FBH1	bHLH80	TFModule	1	PA_chr09_G002982	0.752787	6.76678e-05	0.0127318
Module13	BIM1	0.0387245	1.62508	AT5G08130	NA	BIM1	BIM1	TFModule	1	PA_chr02_cUL0065_G000011	0.746066	8.28759e-05	0.012724
Module1	BZIP68	0.0410631	1.19864	AT1G32150	NA	AtbZIP68-bZIP68	BZIP68	TFModule	1	PA_chr04_G001927	0.734272	0.000103361	0.0122009
Module13	Zm00001d005692	0.0297644	1.34883	AT3G01470	homeobox 1	ATHB-1-ATHB1-HAT5-HB-1-HD-ZIP-1	Zm00001d005692	TFModule	1	PA_chr10_G002875	0.700782	0.000288687	0.0119275
Module20	CDF2	0.0361135	1.38523	AT5G39660	cycling DOF factor 2	CDF2	CDF2	TFModule	1	PA_chr03_G001950	0.714741	0.000343614	0.0110304
Module7	LOB	0.033757	1.19325	AT5G63090	LATERAL ORGAN BOUNDARIES	LOB	LOB	TFModule	1	PA_chr08_G003047	0.708371	0.000412701	0.010996
Module4	EIL3	0.0414879	1.1777	AT1G73730	NA	AtEIL3-ATSLIM-EIL3-SLIM1	EIL3	TFModule	1	PA_chr01_G004914	0.704876	0.000330779	0.0106201
Module20	CDF3	0.0427349	1.41655	AT3G47500	cycling DOF factor 3	CDF3	CDF3	TFModule	1	PA_chr03_G001950	0.714741	0.000343614	0.0104713
MYB4	MYB46	1	1	NA	NA	NA	MYB46	TFTF	4	NA	0	1	0
MYB4	MYB83	1	1	NA	NA	NA	MYB83	TFTF	4	NA	0	1	0
MYB46	BRN2	1	1	NA	NA	NA	BRN2	TFTF	4	NA	0	1	0
MYB83	BRN2	1	1	NA	NA	NA	BRN2	TFTF	4	NA	0	1	0

## Sheet: Pa SCW cesA
Module	Motif	MotifPvalue	MotifEffectSize	locus_name	full_name	symbol_all	Node	Type	Importance	Gene	Correlation	ExpressionPvalue	Score
cesA	MYB83	0.1	1	AT3G08500	myb domain protein 83	AtMYB83-MYB83	MYB83	TFModule	4	PA_chr09_G004772	0.882429	5.41464e-09	0.867222
cesA	MYB46	0.333333	0.666667	AT5G12870	MYB DOMAIN PROTEIN 46	ATMYB46-MYB46	MYB46	TFModule	4	PA_chr09_G004772	0.882429	5.41464e-09	0.41377
cesA	NAC007	0.333333	0.666667	AT1G12260	NAC 007	ANAC007-EMB2749-NAC007-VND4	VND4	TFModule	4	PA_chr07_G004032	0.855904	4.90528e-08	0.365863
cesA	NAC037	0.333333	0.666667	AT2G18060	Arabidopsis NAC domain containing protein 37	ANAC037-VND1	VND1	TFModule	4	PA_chr07_G004032	0.855904	4.90528e-08	0.365863
cesA	NAC076	0.333333	0.666667	AT4G36160	NAC domain containing protein 76	ANAC076-NAC076-VND2	VND2	TFModule	4	PA_chr07_G004032	0.855904	4.90528e-08	0.365863
cesA	NAC101	0.333333	0.666667	AT5G62380	NAC-domain protein 101	ANAC101-NAC101-VND6	VND6	TFModule	4	PA_chr07_G004032	0.855904	4.90528e-08	0.365863
cesA	NAC105	0.333333	0.666667	AT5G66300	Arabidopsis NAC domain containing protein 105	ANAC105-NAC105-VND3	VND3	TFModule	4	PA_chr07_G004032	0.855904	4.90528e-08	0.365863
cesA	EREB71	0.333333	0.666667	AT1G78080	NA	AtWIND1-RAP2.4-WIND1	EREB71	TFModule	1	PA_chr03_G007243	0.73804	2.5417e-05	0.229993

## Sheet: PPI
Species	Protein1	Protein2	pTM	ipTM	disordered	ranking_score	Symbol1	Symbol2
aspen	Potra2n8c16892	Potra2n7c15489	0.4	0.54	0.61	0.82	NAC050	SND2-SND3
aspen	Potra2n8c16892	Potra2n17c31797	0.4	0.54	0.61	0.82	NAC050	SND2-SND3
arabidopsis	MYB58	SND3	0.54	0.6	0.44	0.81	NA	NA
aspen	Potra2n10c20356	Potra2n17c31797	0.41	0.53	0.59	0.81	NAC050	SND2-SND3
spruce	PA_chr11_cUL0023_G000014	PA_chr07_G004032	0.37	0.47	0.69	0.8	NAC050	VND1-VND2-VND3-VND4-VND5-VND6
arabidopsis	VND4	VND3	0.46	0.53	0.55	0.79	NA	NA
arabidopsis	VND5	SND3	0.46	0.52	0.56	0.79	NA	NA
arabidopsis	VND5	VND3	0.45	0.53	0.56	0.79	NA	NA
aspen	Potra2n10c20356	Potra2n7c15489	0.4	0.52	0.6	0.79	NAC050	SND2-SND3
aspen	Potra2n5c12338	Potra2n8c16892	0.41	0.47	0.66	0.79	NAC050	NAC050
aspen	Potra2n5c12338	Potra2n10c20356	0.42	0.47	0.66	0.79	NAC050	NAC050
aspen	Potra2n5c12338	Potra2n114s34556	0.44	0.47	0.66	0.79	NAC050	VND1-VND2-VND3-VND4-VND5-VND6
aspen	Potra2n8c16892	Potra2n14c27178	0.4	0.47	0.66	0.79	NAC050	NST1-NST2-NST3
arabidopsis	NST3	VND3	0.49	0.52	0.52	0.78	NA	NA
arabidopsis	VND2	SND3	0.48	0.51	0.54	0.78	NA	NA
arabidopsis	VND2	VND3	0.47	0.52	0.54	0.78	NA	NA
arabidopsis	VND7	VND3	0.51	0.54	0.5	0.78	NA	NA
aspen	Potra2n10c20356	Potra2n5c11773	0.41	0.48	0.63	0.78	NAC050	VND1-VND2-VND3-VND4-VND5-VND6
aspen	Potra2n8c16892	Potra2n1c1031	0.38	0.46	0.67	0.78	NAC050	VND1-VND2-VND3-VND4-VND5-VND6
aspen	Potra2n8c16892	Potra2n5c11773	0.4	0.47	0.64	0.78	NAC050	VND1-VND2-VND3-VND4-VND5-VND6
aspen	Potra2n10c20356	Potra2n7c16511	0.41	0.47	0.65	0.78	NAC050	VND1-VND2-VND3-VND4-VND5-VND6
aspen	Potra2n5c11773	Potra2n114s34556	0.43	0.46	0.66	0.78	VND1-VND2-VND3-VND4-VND5-VND6	VND1-VND2-VND3-VND4-VND5-VND6
aspen	Potra2n5c12338	Potra2n17c31797	0.47	0.53	0.51	0.78	NAC050	SND2-SND3
aspen	Potra2n8c16892	Potra2n11c23287	0.39	0.48	0.64	0.78	NAC050	SND2-SND3
aspen	Potra2n8c16892	Potra2n1c3797	0.4	0.46	0.66	0.78	NAC050	NST1-NST2-NST3
aspen	Potra2n8c16892	Potra2n7c16511	0.4	0.46	0.66	0.78	NAC050	VND1-VND2-VND3-VND4-VND5-VND6
aspen	Potra2n10c20356	Potra2n114s34556	0.42	0.47	0.64	0.78	NAC050	VND1-VND2-VND3-VND4-VND5-VND6
aspen	Potra2n8c16892	Potra2n114s34556	0.41	0.46	0.66	0.78	NAC050	VND1-VND2-VND3-VND4-VND5-VND6
aspen	Potra2n8c16892	Potra2n2c4785	0.39	0.47	0.66	0.78	NAC050	NST1-NST2-NST3
aspen	Potra2n10c20356	Potra2n3c7486	0.41	0.47	0.65	0.78	NAC050	VND1-VND2-VND3-VND4-VND5-VND6
arabidopsis	NST1	VND3	0.48	0.53	0.51	0.77	NA	NA
arabidopsis	VND1	SND3	0.47	0.52	0.53	0.77	NA	NA
arabidopsis	VND1	VND3	0.47	0.51	0.54	0.77	NA	NA
arabidopsis	VND6	VND3	0.47	0.52	0.52	0.77	NA	NA
aspen	Potra2n10c20356	Potra2n13c25337	0.41	0.44	0.67	0.77	NAC050	VND7
aspen	Potra2n10c20356	Potra2n1c1031	0.4	0.47	0.63	0.77	NAC050	VND1-VND2-VND3-VND4-VND5-VND6
aspen	Potra2n8c16892	Potra2n13c25337	0.42	0.44	0.67	0.77	NAC050	VND7
aspen	Potra2n10c20356	Potra2n11c23287	0.4	0.47	0.63	0.77	NAC050	SND2-SND3
aspen	Potra2n10c20356	Potra2n1c3797	0.42	0.46	0.64	0.77	NAC050	NST1-NST2-NST3
aspen	Potra2n13c25337	Potra2n7c15489	0.5	0.55	0.47	0.77	VND7	SND2-SND3
aspen	Potra2n3c7486	Potra2n7c15489	0.49	0.53	0.5	0.77	VND1-VND2-VND3-VND4-VND5-VND6	SND2-SND3
aspen	Potra2n10c20356	Potra2n11c22498	0.4	0.45	0.65	0.77	NAC050	NST1-NST2-NST3
aspen	Potra2n10c20356	Potra2n2c4785	0.4	0.48	0.62	0.77	NAC050	NST1-NST2-NST3
aspen	Potra2n114s34556	Potra2n7c15489	0.47	0.53	0.5	0.77	VND1-VND2-VND3-VND4-VND5-VND6	SND2-SND3
aspen	Potra2n7c16511	Potra2n114s34556	0.43	0.46	0.63	0.77	VND1-VND2-VND3-VND4-VND5-VND6	VND1-VND2-VND3-VND4-VND5-VND6
aspen	Potra2n8c16892	Potra2n11c22498	0.4	0.46	0.64	0.77	NAC050	NST1-NST2-NST3
aspen	Potra2n10c20356	Potra2n12c24750	0.39	0.46	0.64	0.77	NAC050	VND1-VND2-VND3-VND4-VND5-VND6
aspen	Potra2n5c12338	Potra2n7c15489	0.46	0.53	0.52	0.77	NAC050	SND2-SND3
aspen	Potra2n8c16892	Potra2n3c7486	0.4	0.45	0.66	0.77	NAC050	VND1-VND2-VND3-VND4-VND5-VND6
aspen	Potra2n8c16892	Potra2n4c8837	0.39	0.47	0.64	0.77	NAC050	SND2-SND3
arabidopsis	NST1	NST2	0.48	0.5	0.53	0.76	NA	NA
arabidopsis	NST2	VND2	0.45	0.49	0.54	0.76	NA	NA
arabidopsis	NST3	VND6	0.47	0.49	0.54	0.76	NA	NA
arabidopsis	VND3	SND3	0.53	0.54	0.45	0.76	NA	NA
arabidopsis	VND4	NST2	0.45	0.5	0.55	0.76	NA	NA
arabidopsis	VND4	VND7	0.45	0.49	0.57	0.76	NA	NA
arabidopsis	VND5	NST2	0.45	0.49	0.56	0.76	NA	NA
arabidopsis	VND5	VND7	0.45	0.48	0.57	0.76	NA	NA
aspen	Potra2n114s34556	Potra2n17c31797	0.47	0.53	0.49	0.76	VND1-VND2-VND3-VND4-VND5-VND6	SND2-SND3
aspen	Potra2n11c22498	Potra2n7c15489	0.45	0.52	0.52	0.76	NST1-NST2-NST3	SND2-SND3
aspen	Potra2n14c27178	Potra2n114s34556	0.44	0.47	0.58	0.76	NST1-NST2-NST3	VND1-VND2-VND3-VND4-VND5-VND6
aspen	Potra2n1c3797	Potra2n17c31797	0.45	0.51	0.53	0.76	NST1-NST2-NST3	SND2-SND3
aspen	Potra2n7c15489	Potra2n11c23287	0.46	0.52	0.51	0.76	SND2-SND3	SND2-SND3
aspen	Potra2n7c16511	Potra2n7c15489	0.46	0.52	0.52	0.76	VND1-VND2-VND3-VND4-VND5-VND6	SND2-SND3
aspen	Potra2n10c20356	Potra2n14c27178	0.4	0.46	0.63	0.76	NAC050	NST1-NST2-NST3
aspen	Potra2n4c8837	Potra2n7c15489	0.46	0.53	0.49	0.76	SND2-SND3	SND2-SND3
aspen	Potra2n5c11773	Potra2n17c31797	0.48	0.51	0.51	0.76	VND1-VND2-VND3-VND4-VND5-VND6	SND2-SND3
aspen	Potra2n5c12338	Potra2n2c4785	0.44	0.46	0.6	0.76	NAC050	NST1-NST2-NST3
aspen	Potra2n11c22498	Potra2n17c31797	0.45	0.51	0.52	0.76	NST1-NST2-NST3	SND2-SND3
aspen	Potra2n11c23287	Potra2n17c31797	0.47	0.52	0.5	0.76	SND2-SND3	SND2-SND3
aspen	Potra2n1c3797	Potra2n7c15489	0.45	0.51	0.52	0.76	NST1-NST2-NST3	SND2-SND3
aspen	Potra2n7c16511	Potra2n17c31797	0.48	0.53	0.5	0.76	VND1-VND2-VND3-VND4-VND5-VND6	SND2-SND3
aspen	Potra2n10c20356	Potra2n10c20357	0.39	0.44	0.65	0.76	NAC050	NAC050
aspen	Potra2n10c20357	Potra2n13c25337	0.45	0.49	0.56	0.76	NAC050	VND7
aspen	Potra2n13c25337	Potra2n17c31797	0.5	0.54	0.47	0.76	VND7	SND2-SND3
aspen	Potra2n1c1031	Potra2n17c31797	0.48	0.51	0.51	0.76	VND1-VND2-VND3-VND4-VND5-VND6	SND2-SND3
aspen	Potra2n3c7486	Potra2n17c31797	0.47	0.51	0.52	0.76	VND1-VND2-VND3-VND4-VND5-VND6	SND2-SND3
aspen	Potra2n5c11773	Potra2n7c15489	0.48	0.52	0.49	0.76	VND1-VND2-VND3-VND4-VND5-VND6	SND2-SND3
aspen	Potra2n5c12338	Potra2n13c25337	0.45	0.46	0.59	0.76	NAC050	VND7
aspen	Potra2n8c16892	Potra2n12c24750	0.39	0.45	0.66	0.76	NAC050	VND1-VND2-VND3-VND4-VND5-VND6
arabidopsis	NAC050	SND2	0.41	0.5	0.54	0.75	NA	NA
arabidopsis	NST2	VND3	0.5	0.52	0.47	0.75	NA	NA
arabidopsis	NST2	VND6	0.46	0.49	0.53	0.75	NA	NA
arabidopsis	NST3	NST1	0.46	0.46	0.56	0.75	NA	NA
arabidopsis	NST3	NST2	0.47	0.49	0.54	0.75	NA	NA
arabidopsis	NST3	SND3	0.48	0.49	0.52	0.75	NA	NA
arabidopsis	NST3	VND2	0.44	0.46	0.57	0.75	NA	NA
arabidopsis	NST3	VND5	0.44	0.47	0.57	0.75	NA	NA
arabidopsis	NST3	VND7	0.46	0.48	0.55	0.75	NA	NA
arabidopsis	VND1	NST2	0.46	0.49	0.54	0.75	NA	NA
arabidopsis	VND2	SND2	0.48	0.5	0.51	0.75	NA	NA
arabidopsis	VND4	NST1	0.44	0.47	0.58	0.75	NA	NA
arabidopsis	VND4	SND2	0.46	0.5	0.51	0.75	NA	NA
arabidopsis	VND4	SND3	0.45	0.5	0.52	0.75	NA	NA
arabidopsis	VND5	NST1	0.44	0.47	0.57	0.75	NA	NA
arabidopsis	VND5	SND2	0.45	0.5	0.52	0.75	NA	NA
arabidopsis	VND7	NST2	0.48	0.49	0.52	0.75	NA	NA
arabidopsis	VND7	VND1	0.46	0.48	0.55	0.75	NA	NA
arabidopsis	VND7	VND2	0.45	0.48	0.56	0.75	NA	NA
aspen	Potra2n14c27178	Potra2n17c31797	0.48	0.51	0.49	0.75	NST1-NST2-NST3	SND2-SND3
aspen	Potra2n2c4785	Potra2n114s34556	0.44	0.47	0.58	0.75	NST1-NST2-NST3	VND1-VND2-VND3-VND4-VND5-VND6
aspen	Potra2n2c4785	Potra2n17c31797	0.47	0.51	0.49	0.75	NST1-NST2-NST3	SND2-SND3
aspen	Potra2n5c12338	Potra2n14c27178	0.44	0.47	0.57	0.75	NAC050	NST1-NST2-NST3
aspen	Potra2n5c12338	Potra2n1c3797	0.42	0.44	0.61	0.75	NAC050	NST1-NST2-NST3
aspen	Potra2n5c12338	Potra2n7c16511	0.42	0.44	0.61	0.75	NAC050	VND1-VND2-VND3-VND4-VND5-VND6
aspen	Potra2n5c12338	Potra2n11c22498	0.42	0.45	0.61	0.75	NAC050	NST1-NST2-NST3
aspen	Potra2n14c27178	Potra2n7c15489	0.48	0.51	0.5	0.75	NST1-NST2-NST3	SND2-SND3
aspen	Potra2n2c4785	Potra2n7c15489	0.46	0.5	0.52	0.75	NST1-NST2-NST3	SND2-SND3
aspen	Potra2n10c20356	Potra2n4c8837	0.39	0.45	0.64	0.75	NAC050	SND2-SND3
aspen	Potra2n10c20357	Potra2n7c15489	0.47	0.51	0.5	0.75	NAC050	SND2-SND3
aspen	Potra2n12c24750	Potra2n7c15489	0.46	0.5	0.51	0.75	VND1-VND2-VND3-VND4-VND5-VND6	SND2-SND3
aspen	Potra2n5c12338	Potra2n1c1031	0.44	0.46	0.59	0.75	NAC050	VND1-VND2-VND3-VND4-VND5-VND6
aspen	Potra2n8c16892	Potra2n10c20357	0.39	0.43	0.65	0.75	NAC050	NAC050
spruce	PA_chr04_G002634	PA_chr02_G002179	0.31	0.48	0.6	0.75	MYB4	SGR5
arabidopsis	NAC050	VND3	0.43	0.52	0.48	0.74	NA	NA
arabidopsis	NST1	SND3	0.48	0.48	0.51	0.74	NA	NA
arabidopsis	NST1	VND2	0.45	0.47	0.56	0.74	NA	NA
arabidopsis	NST1	VND6	0.45	0.46	0.55	0.74	NA	NA
arabidopsis	NST2	SND3	0.49	0.5	0.49	0.74	NA	NA
arabidopsis	NST3	SND2	0.49	0.49	0.49	0.74	NA	NA
arabidopsis	NST3	VND1	0.45	0.46	0.58	0.74	NA	NA
arabidopsis	VND1	NST1	0.45	0.47	0.55	0.74	NA	NA
arabidopsis	VND2	VND6	0.44	0.45	0.57	0.74	NA	NA
arabidopsis	VND4	NST3	0.43	0.45	0.59	0.74	NA	NA
arabidopsis	VND4	VND6	0.44	0.45	0.57	0.74	NA	NA
arabidopsis	VND5	VND1	0.42	0.44	0.6	0.74	NA	NA
arabidopsis	VND5	VND6	0.44	0.46	0.58	0.74	NA	NA
arabidopsis	VND6	SND3	0.46	0.48	0.52	0.74	NA	NA
arabidopsis	VND7	NST1	0.46	0.48	0.54	0.74	NA	NA
arabidopsis	VND7	SND3	0.5	0.5	0.47	0.74	NA	NA
arabidopsis	VND7	VND6	0.46	0.48	0.54	0.74	NA	NA
aspen	Potra2n12c24052	Potra2n114s34556	0.32	0.43	0.67	0.74	SGR5	VND1-VND2-VND3-VND4-VND5-VND6
aspen	Potra2n13c25337	Potra2n4c8837	0.48	0.48	0.52	0.74	VND7	SND2-SND3
aspen	Potra2n1c3797	Potra2n114s34556	0.44	0.45	0.59	0.74	NST1-NST2-NST3	VND1-VND2-VND3-VND4-VND5-VND6
aspen	Potra2n1c3797	Potra2n2c4785	0.43	0.45	0.6	0.74	NST1-NST2-NST3	NST1-NST2-NST3
aspen	Potra2n2c4785	Potra2n11c22498	0.42	0.44	0.6	0.74	NST1-NST2-NST3	NST1-NST2-NST3
aspen	Potra2n5c11773	Potra2n14c27178	0.43	0.45	0.58	0.74	VND1-VND2-VND3-VND4-VND5-VND6	NST1-NST2-NST3
aspen	Potra2n5c11773	Potra2n7c16511	0.43	0.43	0.62	0.74	VND1-VND2-VND3-VND4-VND5-VND6	VND1-VND2-VND3-VND4-VND5-VND6
aspen	Potra2n7c16511	Potra2n13c25337	0.43	0.44	0.62	0.74	VND1-VND2-VND3-VND4-VND5-VND6	VND7
aspen	Potra2n114s34556	Potra2n4c8837	0.44	0.45	0.57	0.74	VND1-VND2-VND3-VND4-VND5-VND6	SND2-SND3
aspen	Potra2n11c22498	Potra2n11c23287	0.44	0.47	0.56	0.74	NST1-NST2-NST3	SND2-SND3
aspen	Potra2n11c22498	Potra2n14c27178	0.43	0.45	0.6	0.74	NST1-NST2-NST3	NST1-NST2-NST3
aspen	Potra2n12c24750	Potra2n17c31797	0.47	0.51	0.49	0.74	VND1-VND2-VND3-VND4-VND5-VND6	SND2-SND3
aspen	Potra2n1c1031	Potra2n5c11773	0.43	0.45	0.59	0.74	VND1-VND2-VND3-VND4-VND5-VND6	VND1-VND2-VND3-VND4-VND5-VND6
aspen	Potra2n1c1031	Potra2n7c15489	0.48	0.51	0.47	0.74	VND1-VND2-VND3-VND4-VND5-VND6	SND2-SND3
aspen	Potra2n1c3797	Potra2n3c7486	0.43	0.44	0.6	0.74	NST1-NST2-NST3	VND1-VND2-VND3-VND4-VND5-VND6
aspen	Potra2n1c3797	Potra2n4c8837	0.43	0.46	0.58	0.74	NST1-NST2-NST3	SND2-SND3
aspen	Potra2n2c4785	Potra2n3c7486	0.44	0.45	0.57	0.74	NST1-NST2-NST3	VND1-VND2-VND3-VND4-VND5-VND6
aspen	Potra2n3c7486	Potra2n13c25337	0.43	0.44	0.6	0.74	VND1-VND2-VND3-VND4-VND5-VND6	VND7
aspen	Potra2n3c7486	Potra2n5c11773	0.43	0.43	0.61	0.74	VND1-VND2-VND3-VND4-VND5-VND6	VND1-VND2-VND3-VND4-VND5-VND6
aspen	Potra2n7c16511	Potra2n14c27178	0.43	0.45	0.58	0.74	VND1-VND2-VND3-VND4-VND5-VND6	NST1-NST2-NST3
aspen	Potra2n13c25337	Potra2n11c23287	0.48	0.48	0.52	0.74	VND7	SND2-SND3
aspen	Potra2n1c1031	Potra2n1c3797	0.43	0.46	0.59	0.74	VND1-VND2-VND3-VND4-VND5-VND6	NST1-NST2-NST3
aspen	Potra2n1c1031	Potra2n7c16511	0.44	0.45	0.58	0.74	VND1-VND2-VND3-VND4-VND5-VND6	VND1-VND2-VND3-VND4-VND5-VND6
aspen	Potra2n1c3797	Potra2n5c11773	0.42	0.43	0.61	0.74	NST1-NST2-NST3	VND1-VND2-VND3-VND4-VND5-VND6
aspen	Potra2n2c4785	Potra2n13c25337	0.43	0.45	0.58	0.74	NST1-NST2-NST3	VND7
aspen	Potra2n2c4785	Potra2n5c11773	0.43	0.44	0.59	0.74	NST1-NST2-NST3	VND1-VND2-VND3-VND4-VND5-VND6
aspen	Potra2n3c7486	Potra2n14c27178	0.44	0.46	0.56	0.74	VND1-VND2-VND3-VND4-VND5-VND6	NST1-NST2-NST3
aspen	Potra2n3c7486	Potra2n7c16511	0.44	0.44	0.6	0.74	VND1-VND2-VND3-VND4-VND5-VND6	VND1-VND2-VND3-VND4-VND5-VND6
aspen	Potra2n5c12338	Potra2n12c24750	0.44	0.45	0.58	0.74	NAC050	VND1-VND2-VND3-VND4-VND5-VND6
aspen	Potra2n5c12338	Potra2n3c7486	0.43	0.44	0.6	0.74	NAC050	VND1-VND2-VND3-VND4-VND5-VND6
aspen	Potra2n8c16892	Potra2n10c20356	0.37	0.38	0.72	0.74	NAC050	NAC050
aspen	Potra2n11c22498	Potra2n12c24750	0.42	0.44	0.6	0.74	NST1-NST2-NST3	VND1-VND2-VND3-VND4-VND5-VND6
aspen	Potra2n1c1031	Potra2n114s34556	0.42	0.45	0.59	0.74	VND1-VND2-VND3-VND4-VND5-VND6	VND1-VND2-VND3-VND4-VND5-VND6
aspen	Potra2n1c1031	Potra2n11c22498	0.42	0.46	0.59	0.74	VND1-VND2-VND3-VND4-VND5-VND6	NST1-NST2-NST3
aspen	Potra2n1c3797	Potra2n11c23287	0.45	0.47	0.56	0.74	NST1-NST2-NST3	SND2-SND3
aspen	Potra2n1c3797	Potra2n14c27178	0.43	0.44	0.6	0.74	NST1-NST2-NST3	NST1-NST2-NST3
aspen	Potra2n2c4785	Potra2n7c16511	0.44	0.45	0.58	0.74	NST1-NST2-NST3	VND1-VND2-VND3-VND4-VND5-VND6
aspen	Potra2n3c7486	Potra2n11c22498	0.43	0.45	0.59	0.74	VND1-VND2-VND3-VND4-VND5-VND6	NST1-NST2-NST3
aspen	Potra2n4c8837	Potra2n17c31797	0.45	0.51	0.49	0.74	SND2-SND3	SND2-SND3
aspen	Potra2n5c11773	Potra2n13c25337	0.43	0.45	0.59	0.74	VND1-VND2-VND3-VND4-VND5-VND6	VND7
aspen	Potra2n5c12338	Potra2n5c11773	0.43	0.44	0.61	0.74	NAC050	VND1-VND2-VND3-VND4-VND5-VND6
aspen	Potra2n7c16511	Potra2n12c24750	0.44	0.44	0.59	0.74	VND1-VND2-VND3-VND4-VND5-VND6	VND1-VND2-VND3-VND4-VND5-VND6
arabidopsis	NAC050	NST2	0.41	0.48	0.52	0.73	NA	NA
arabidopsis	NST1	SND2	0.49	0.49	0.47	0.73	NA	NA
arabidopsis	SND3	SND2	0.49	0.5	0.47	0.73	NA	NA
arabidopsis	VND1	SND2	0.47	0.48	0.49	0.73	NA	NA
arabidopsis	VND1	VND2	0.43	0.44	0.59	0.73	NA	NA
arabidopsis	VND1	VND6	0.44	0.45	0.57	0.73	NA	NA
arabidopsis	VND4	VND1	0.42	0.44	0.59	0.73	NA	NA
arabidopsis	VND4	VND2	0.42	0.43	0.6	0.73	NA	NA
arabidopsis	VND5	VND2	0.42	0.44	0.6	0.73	NA	NA
aspen	Potra2n10c20357	Potra2n14c27178	0.44	0.45	0.56	0.73	NAC050	NST1-NST2-NST3
aspen	Potra2n12c24750	Potra2n14c27178	0.44	0.45	0.56	0.73	VND1-VND2-VND3-VND4-VND5-VND6	NST1-NST2-NST3
aspen	Potra2n1c1031	Potra2n12c24750	0.44	0.44	0.58	0.73	VND1-VND2-VND3-VND4-VND5-VND6	VND1-VND2-VND3-VND4-VND5-VND6
aspen	Potra2n1c1031	Potra2n3c7486	0.43	0.44	0.58	0.73	VND1-VND2-VND3-VND4-VND5-VND6	VND1-VND2-VND3-VND4-VND5-VND6
aspen	Potra2n1c1031	Potra2n4c8837	0.47	0.46	0.54	0.73	VND1-VND2-VND3-VND4-VND5-VND6	SND2-SND3
aspen	Potra2n3c7486	Potra2n12c24750	0.43	0.44	0.59	0.73	VND1-VND2-VND3-VND4-VND5-VND6	VND1-VND2-VND3-VND4-VND5-VND6
aspen	Potra2n5c11773	Potra2n11c23287	0.46	0.46	0.55	0.73	VND1-VND2-VND3-VND4-VND5-VND6	SND2-SND3
aspen	Potra2n5c12338	Potra2n11c23287	0.44	0.44	0.58	0.73	NAC050	SND2-SND3
aspen	Potra2n10c20357	Potra2n17c31797	0.46	0.5	0.47	0.73	NAC050	SND2-SND3
aspen	Potra2n12c24750	Potra2n114s34556	0.43	0.44	0.58	0.73	VND1-VND2-VND3-VND4-VND5-VND6	VND1-VND2-VND3-VND4-VND5-VND6
aspen	Potra2n1c3797	Potra2n12c24750	0.42	0.44	0.6	0.73	NST1-NST2-NST3	VND1-VND2-VND3-VND4-VND5-VND6
aspen	Potra2n2c4785	Potra2n12c24750	0.44	0.45	0.57	0.73	NST1-NST2-NST3	VND1-VND2-VND3-VND4-VND5-VND6
aspen	Potra2n2c4785	Potra2n4c8837	0.46	0.45	0.54	0.73	NST1-NST2-NST3	SND2-SND3
aspen	Potra2n5c11773	Potra2n11c22498	0.41	0.43	0.6	0.73	VND1-VND2-VND3-VND4-VND5-VND6	NST1-NST2-NST3
aspen	Potra2n7c16511	Potra2n11c23287	0.45	0.45	0.56	0.73	VND1-VND2-VND3-VND4-VND5-VND6	SND2-SND3
aspen	Potra2n11c22498	Potra2n114s34556	0.42	0.43	0.61	0.73	NST1-NST2-NST3	VND1-VND2-VND3-VND4-VND5-VND6
aspen	Potra2n13c25337	Potra2n14c27178	0.43	0.46	0.56	0.73	VND7	NST1-NST2-NST3
aspen	Potra2n1c1031	Potra2n14c27178	0.45	0.45	0.55	0.73	VND1-VND2-VND3-VND4-VND5-VND6	NST1-NST2-NST3
aspen	Potra2n3c7486	Potra2n11c23287	0.46	0.45	0.56	0.73	VND1-VND2-VND3-VND4-VND5-VND6	SND2-SND3
aspen	Potra2n5c11773	Potra2n12c24750	0.43	0.44	0.59	0.73	VND1-VND2-VND3-VND4-VND5-VND6	VND1-VND2-VND3-VND4-VND5-VND6
aspen	Potra2n5c12338	Potra2n10c20357	0.44	0.45	0.56	0.73	NAC050	NAC050
aspen	Potra2n7c16511	Potra2n11c22498	0.42	0.44	0.6	0.73	VND1-VND2-VND3-VND4-VND5-VND6	NST1-NST2-NST3
aspen	Potra2n10c20357	Potra2n1c1031	0.44	0.46	0.55	0.73	NAC050	VND1-VND2-VND3-VND4-VND5-VND6
aspen	Potra2n114s34556	Potra2n11c23287	0.45	0.45	0.55	0.73	VND1-VND2-VND3-VND4-VND5-VND6	SND2-SND3
aspen	Potra2n11c22498	Potra2n4c8837	0.43	0.45	0.57	0.73	NST1-NST2-NST3	SND2-SND3
aspen	Potra2n14c27178	Potra2n11c23287	0.47	0.47	0.52	0.73	NST1-NST2-NST3	SND2-SND3
aspen	Potra2n1c1031	Potra2n2c4785	0.44	0.45	0.57	0.73	VND1-VND2-VND3-VND4-VND5-VND6	NST1-NST2-NST3
aspen	Potra2n1c3797	Potra2n7c16511	0.42	0.43	0.61	0.73	NST1-NST2-NST3	VND1-VND2-VND3-VND4-VND5-VND6
aspen	Potra2n2c4785	Potra2n11c23287	0.45	0.45	0.55	0.73	NST1-NST2-NST3	SND2-SND3
aspen	Potra2n7c16511	Potra2n4c8837	0.45	0.45	0.55	0.73	VND1-VND2-VND3-VND4-VND5-VND6	SND2-SND3
arabidopsis	NAC050	SND3	0.42	0.5	0.46	0.72	NA	NA
arabidopsis	NAC050	VND7	0.41	0.46	0.53	0.72	NA	NA
arabidopsis	VND3	SND2	0.52	0.53	0.4	0.72	NA	NA
arabidopsis	VND7	SND2	0.51	0.49	0.46	0.72	NA	NA
aspen	Potra2n10c20357	Potra2n1c3797	0.42	0.42	0.6	0.72	NAC050	NST1-NST2-NST3
aspen	Potra2n10c20357	Potra2n7c16511	0.41	0.42	0.59	0.72	NAC050	VND1-VND2-VND3-VND4-VND5-VND6
aspen	Potra2n12c24750	Potra2n11c23287	0.45	0.46	0.54	0.72	VND1-VND2-VND3-VND4-VND5-VND6	SND2-SND3
aspen	Potra2n1c3797	Potra2n11c22498	0.4	0.41	0.63	0.72	NST1-NST2-NST3	NST1-NST2-NST3
aspen	Potra2n2c4723	Potra2n13c25337	0.28	0.38	0.72	0.72	MYB61	VND7
aspen	Potra2n3c7486	Potra2n4c8837	0.45	0.46	0.52	0.72	VND1-VND2-VND3-VND4-VND5-VND6	SND2-SND3
aspen	Potra2n10c20357	Potra2n2c4785	0.43	0.44	0.55	0.72	NAC050	NST1-NST2-NST3
aspen	Potra2n1c1031	Potra2n13c25337	0.42	0.43	0.58	0.72	VND1-VND2-VND3-VND4-VND5-VND6	VND7
aspen	Potra2n7c15489	Potra2n17c31797	0.5	0.5	0.44	0.72	SND2-SND3	SND2-SND3
aspen	Potra2n10c20357	Potra2n12c24750	0.42	0.43	0.57	0.72	NAC050	VND1-VND2-VND3-VND4-VND5-VND6
aspen	Potra2n12c24750	Potra2n4c8837	0.45	0.45	0.54	0.72	VND1-VND2-VND3-VND4-VND5-VND6	SND2-SND3
aspen	Potra2n1c1031	Potra2n11c23287	0.45	0.44	0.54	0.72	VND1-VND2-VND3-VND4-VND5-VND6	SND2-SND3
aspen	Potra2n5c11773	Potra2n4c8837	0.45	0.44	0.56	0.72	VND1-VND2-VND3-VND4-VND5-VND6	SND2-SND3
aspen	Potra2n5c12338	Potra2n4c8837	0.44	0.45	0.55	0.72	NAC050	SND2-SND3
aspen	Potra2n10c20357	Potra2n5c11773	0.41	0.42	0.6	0.72	NAC050	VND1-VND2-VND3-VND4-VND5-VND6
aspen	Potra2n13c25337	Potra2n114s34556	0.41	0.42	0.59	0.72	VND7	VND1-VND2-VND3-VND4-VND5-VND6
aspen	Potra2n2c4785	Potra2n14c27178	0.44	0.44	0.56	0.72	NST1-NST2-NST3	NST1-NST2-NST3
aspen	Potra2n3c7486	Potra2n114s34556	0.42	0.43	0.59	0.72	VND1-VND2-VND3-VND4-VND5-VND6	VND1-VND2-VND3-VND4-VND5-VND6
aspen	Potra2n8c17916	Potra2n12c24052	0.24	0.4	0.7	0.72	SGR5	SGR5
arabidopsis	NAC050	NST1	0.4	0.44	0.54	0.71	NA	NA
arabidopsis	NAC050	VND1	0.4	0.43	0.56	0.71	NA	NA
arabidopsis	NST2	SND2	0.51	0.5	0.42	0.71	NA	NA
arabidopsis	VND4	VND5	0.41	0.41	0.6	0.71	NA	NA
arabidopsis	VND6	SND2	0.46	0.46	0.5	0.71	NA	NA
aspen	Potra2n10c20357	Potra2n11c23287	0.43	0.44	0.55	0.71	NAC050	SND2-SND3
aspen	Potra2n11c22498	Potra2n13c25337	0.41	0.41	0.6	0.71	NST1-NST2-NST3	VND7
aspen	Potra2n10c20357	Potra2n11c22498	0.42	0.42	0.57	0.71	NAC050	NST1-NST2-NST3
aspen	Potra2n14c27178	Potra2n4c8837	0.46	0.45	0.52	0.71	NST1-NST2-NST3	SND2-SND3
aspen	Potra2n10c20357	Potra2n4c8837	0.43	0.43	0.56	0.71	NAC050	SND2-SND3
aspen	Potra2n1c3797	Potra2n13c25337	0.42	0.43	0.57	0.71	NST1-NST2-NST3	VND7
aspen	Potra2n12c24750	Potra2n13c25337	0.41	0.43	0.58	0.71	VND1-VND2-VND3-VND4-VND5-VND6	VND7
spruce	PA_chr11_cUL0023_G000014	PA_chr11_G001721	0.33	0.32	0.79	0.71	NAC050	NST1-NST2-NST3
arabidopsis	NAC050	NST3	0.41	0.46	0.51	0.7	NA	NA
arabidopsis	NAC050	VND4	0.4	0.43	0.55	0.7	NA	NA
arabidopsis	NAC050	VND5	0.4	0.43	0.55	0.7	NA	NA
aspen	Potra2n19c34420	Potra2n13c25337	0.36	0.51	0.44	0.7	MYB4	VND7
aspen	Potra2n15c28920	Potra2n7c15489	0.34	0.43	0.57	0.7	SGR5	SND2-SND3
aspen	Potra2n10c20357	Potra2n3c7486	0.42	0.42	0.57	0.7	NAC050	VND1-VND2-VND3-VND4-VND5-VND6
aspen	Potra2n4c8837	Potra2n11c23287	0.43	0.44	0.54	0.7	SND2-SND3	SND2-SND3
aspen	Potra2n15c28920	Potra2n17c31797	0.35	0.43	0.58	0.7	SGR5	SND2-SND3
aspen	Potra2n5c11957	Potra2n114s34556	0.32	0.39	0.65	0.7	MYB58	VND1-VND2-VND3-VND4-VND5-VND6
spruce	PA_chr07_G004032	PA_chr11_G001721	0.35	0.34	0.73	0.7	VND1-VND2-VND3-VND4-VND5-VND6	NST1-NST2-NST3
arabidopsis	NAC050	VND2	0.4	0.43	0.55	0.69	NA	NA
arabidopsis	NAC050	VND6	0.4	0.44	0.52	0.69	NA	NA
aspen	Potra2n10c21559	Potra2n17c31797	0.34	0.42	0.56	0.69	SGR5	SND2-SND3
aspen	Potra2n10c20357	Potra2n114s34556	0.4	0.4	0.58	0.69	NAC050	VND1-VND2-VND3-VND4-VND5-VND6
aspen	Potra2n7c16051	Potra2n114s34556	0.34	0.38	0.64	0.69	MYB58	VND1-VND2-VND3-VND4-VND5-VND6
aspen	Potra2n7c16051	Potra2n2c4785	0.32	0.38	0.64	0.69	MYB58	NST1-NST2-NST3
spruce	PA_chr01_G003821	PA_chr07_G004032	0.35	0.42	0.56	0.69	MYB4	VND1-VND2-VND3-VND4-VND5-VND6
spruce	PA_chr04_G002634	PA_chr02_G002184	0.24	0.35	0.72	0.69	MYB4	SGR5
aspen	Potra2n5c11819	Potra2n114s34556	0.33	0.39	0.61	0.68	MYB4	VND1-VND2-VND3-VND4-VND5-VND6
aspen	Potra2n7c16051	Potra2n1c3797	0.31	0.36	0.66	0.68	MYB58	NST1-NST2-NST3
aspen	Potra2n10c21559	Potra2n5c12338	0.34	0.35	0.66	0.68	SGR5	NAC050
aspen	Potra2n10c21559	Potra2n7c15489	0.33	0.39	0.6	0.68	SGR5	SND2-SND3
aspen	Potra2n5c11957	Potra2n1c3797	0.31	0.35	0.68	0.68	MYB58	NST1-NST2-NST3
aspen	Potra2n5c11957	Potra2n7c16511	0.31	0.36	0.66	0.68	MYB58	VND1-VND2-VND3-VND4-VND5-VND6
aspen	Potra2n7c16051	Potra2n11c22498	0.31	0.35	0.67	0.68	MYB58	NST1-NST2-NST3
aspen	Potra2n1c2250	Potra2n13c25337	0.28	0.36	0.69	0.68	MYB46-MYB83	VND7
aspen	Potra2n5c11957	Potra2n11c22498	0.31	0.35	0.67	0.68	MYB58	NST1-NST2-NST3
spruce	PA_chr02_G002184	PA_chr11_G001721	0.22	0.28	0.82	0.68	SGR5	NST1-NST2-NST3
arabidopsis	MYB46	VND3	0.43	0.42	0.51	0.67	NA	NA
aspen	Potra2n15c28920	Potra2n5c12338	0.34	0.35	0.65	0.67	SGR5	NAC050
aspen	Potra2n4c9980	Potra2n12c24750	0.33	0.4	0.56	0.67	MYB4	VND1-VND2-VND3-VND4-VND5-VND6
aspen	Potra2n4c9980	Potra2n3c7486	0.32	0.4	0.57	0.67	MYB4	VND1-VND2-VND3-VND4-VND5-VND6
aspen	Potra2n7c16051	Potra2n7c16511	0.31	0.35	0.66	0.67	MYB58	VND1-VND2-VND3-VND4-VND5-VND6
aspen	Potra2n5c11819	Potra2n13c25337	0.29	0.36	0.65	0.67	MYB4	VND7
aspen	Potra2n10c21559	Potra2n11c23287	0.33	0.37	0.62	0.67	SGR5	SND2-SND3
spruce	PA_chr04_G002634	PA_chr07_G004032	0.31	0.42	0.54	0.67	MYB4	VND1-VND2-VND3-VND4-VND5-VND6
spruce	PA_chr04_G002634	PA_chr11_cUL0023_G000014	0.27	0.35	0.67	0.67	MYB4	NAC050
aspen	Potra2n15c28920	Potra2n4c8837	0.32	0.36	0.62	0.66	SGR5	SND2-SND3
aspen	Potra2n1c2250	Potra2n11c22498	0.31	0.36	0.62	0.66	MYB46-MYB83	NST1-NST2-NST3
aspen	Potra2n5c11819	Potra2n12c24750	0.32	0.35	0.62	0.66	MYB4	VND1-VND2-VND3-VND4-VND5-VND6
aspen	Potra2n12c24052	Potra2n13c25337	0.27	0.35	0.67	0.66	SGR5	VND7
aspen	Potra2n5c11819	Potra2n1c1031	0.31	0.37	0.61	0.66	MYB4	VND1-VND2-VND3-VND4-VND5-VND6
aspen	Potra2n15c28466	Potra2n13c25337	0.27	0.36	0.64	0.66	MYB61	VND7
aspen	Potra2n5c11957	Potra2n2c4785	0.31	0.35	0.64	0.66	MYB58	NST1-NST2-NST3
aspen	Potra2n8c17916	Potra2n114s34556	0.32	0.42	0.53	0.66	SGR5	VND1-VND2-VND3-VND4-VND5-VND6
spruce	PA_chr01_G002784	PA_chr11_cUL0023_G000014	0.27	0.33	0.69	0.66	MYB4	NAC050
aspen	Potra2n9c18946	Potra2n1c1031	0.32	0.37	0.58	0.65	MYB4	VND1-VND2-VND3-VND4-VND5-VND6
aspen	Potra2n5c11819	Potra2n3c7486	0.31	0.35	0.62	0.65	MYB4	VND1-VND2-VND3-VND4-VND5-VND6
aspen	Potra2n5c11957	Potra2n13c25337	0.26	0.35	0.64	0.65	MYB58	VND7
aspen	Potra2n2c4723	Potra2n10c20356	0.3	0.29	0.72	0.65	MYB61	NAC050
aspen	Potra2n4c9980	Potra2n1c1031	0.33	0.38	0.56	0.65	MYB4	VND1-VND2-VND3-VND4-VND5-VND6
aspen	Potra2n7c16051	Potra2n10c20356	0.31	0.29	0.71	0.65	MYB58	NAC050
aspen	Potra2n9c18946	Potra2n114s34556	0.31	0.37	0.59	0.65	MYB4	VND1-VND2-VND3-VND4-VND5-VND6
aspen	Potra2n443s35699	Potra2n13c25337	0.29	0.34	0.63	0.65	MYB61	VND7
aspen	Potra2n5c11957	Potra2n10c20356	0.3	0.3	0.71	0.65	MYB58	NAC050
aspen	Potra2n4c9980	Potra2n114s34556	0.33	0.36	0.57	0.64	MYB4	VND1-VND2-VND3-VND4-VND5-VND6
aspen	Potra2n15c28920	Potra2n11c23287	0.32	0.35	0.59	0.64	SGR5	SND2-SND3
aspen	Potra2n4c9199	Potra2n13c25337	0.3	0.32	0.64	0.64	MYB43	VND7
aspen	Potra2n9c18946	Potra2n12c24750	0.32	0.36	0.59	0.64	MYB4	VND1-VND2-VND3-VND4-VND5-VND6
spruce	PA_chr02_G002179	PA_chr11_cUL0023_G000014	0.26	0.29	0.72	0.64	SGR5	NAC050
spruce	PA_chr12_G002840	PA_chr11_G001721	0.3	0.25	0.75	0.64	MYB4	NST1-NST2-NST3
arabidopsis	MYB4	VND5	0.29	0.35	0.6	0.63	NA	NA
aspen	Potra2n1c2250	Potra2n14c27178	0.31	0.31	0.62	0.63	MYB46-MYB83	NST1-NST2-NST3
aspen	Potra2n1c2250	Potra2n1c3797	0.29	0.31	0.64	0.63	MYB46-MYB83	NST1-NST2-NST3
aspen	Potra2n1c2250	Potra2n7c16511	0.3	0.3	0.66	0.63	MYB46-MYB83	VND1-VND2-VND3-VND4-VND5-VND6
aspen	Potra2n1c2250	Potra2n2c4785	0.31	0.31	0.65	0.63	MYB46-MYB83	NST1-NST2-NST3
aspen	Potra2n7c16051	Potra2n14c27178	0.33	0.31	0.62	0.63	MYB58	NST1-NST2-NST3
aspen	Potra2n4c9980	Potra2n13c25337	0.43	0.35	0.53	0.63	MYB4	VND7
aspen	Potra2n5c11957	Potra2n14c27178	0.31	0.31	0.65	0.63	MYB58	NST1-NST2-NST3
aspen	Potra2n9c18946	Potra2n3c7486	0.32	0.35	0.58	0.63	MYB4	VND1-VND2-VND3-VND4-VND5-VND6
spruce	PA_chr01_G002766	PA_chr11_cUL0023_G000014	0.27	0.29	0.68	0.63	MYB4	NAC050
spruce	PA_chr01_G002769	PA_chr11_cUL0023_G000014	0.28	0.29	0.68	0.63	MYB4	NAC050
spruce	PA_chr01_G002786	PA_chr08_G001160	0.25	0.28	0.7	0.63	MYB4	MYB61
spruce	PA_chr04_G002634	PA_chr11_G001721	0.33	0.25	0.72	0.63	MYB4	NST1-NST2-NST3
aspen	Potra2n9c18946	Potra2n13c25337	0.32	0.35	0.56	0.62	MYB4	VND7
aspen	Potra2n10c21559	Potra2n4c8837	0.32	0.32	0.6	0.62	SGR5	SND2-SND3
aspen	Potra2n4c9673	Potra2n13c25337	0.29	0.33	0.6	0.62	MYB4	VND7
aspen	Potra2n5c11957	Potra2n8c16892	0.31	0.25	0.72	0.62	MYB58	NAC050
aspen	Potra2n8c17916	Potra2n10c21559	0.23	0.3	0.68	0.62	SGR5	SGR5
aspen	Potra2n9c18946	Potra2n10c20356	0.34	0.28	0.67	0.62	MYB4	NAC050
aspen	Potra2n10c22314	Potra2n8c16892	0.33	0.27	0.66	0.62	MYB61	NAC050
spruce	PA_chr01_G002766	PA_chr11_G001721	0.3	0.23	0.75	0.62	MYB4	NST1-NST2-NST3
spruce	PA_chr01_G002778	PA_chr07_G004032	0.3	0.33	0.59	0.62	MYB4	VND1-VND2-VND3-VND4-VND5-VND6
spruce	PA_chr01_G002786	PA_chr08_cUL0031_G000431	0.25	0.28	0.69	0.62	MYB4	MYB61
spruce	PA_chr04_G002634	PA_chr08_cUL0031_G000431	0.24	0.29	0.68	0.62	MYB4	MYB61
spruce	PA_chr12_G002836	PA_chr11_G001721	0.33	0.24	0.72	0.62	MYB4	NST1-NST2-NST3
arabidopsis	MYB4	VND4	0.29	0.32	0.6	0.61	NA	NA
arabidopsis	MYB61	SGR5	0.24	0.26	0.7	0.61	NA	NA
aspen	Potra2n17c30794	Potra2n13c25337	0.35	0.29	0.61	0.61	MYB43	VND7
aspen	Potra2n4c9199	Potra2n17c30794	0.26	0.26	0.71	0.61	MYB43	MYB43
aspen	Potra2n19c34420	Potra2n8c16892	0.33	0.28	0.63	0.61	MYB4	NAC050
aspen	Potra2n15c28920	Potra2n8c16892	0.27	0.26	0.7	0.61	SGR5	NAC050
aspen	Potra2n5c11957	Potra2n10c21559	0.25	0.26	0.69	0.61	MYB58	SGR5
aspen	Potra2n1c2250	Potra2n1c1031	0.3	0.29	0.63	0.61	MYB46-MYB83	VND1-VND2-VND3-VND4-VND5-VND6
aspen	Potra2n4c9673	Potra2n12c24052	0.29	0.3	0.63	0.61	MYB4	SGR5
aspen	Potra2n4c9980	Potra2n8c16892	0.33	0.27	0.66	0.61	MYB4	NAC050
spruce	PA_chr01_G002769	PA_chr08_cUL0031_G000431	0.25	0.26	0.7	0.61	MYB4	MYB61
spruce	PA_chr01_G002769	PA_chr11_G001721	0.32	0.23	0.72	0.61	MYB4	NST1-NST2-NST3
spruce	PA_chr01_G002782	PA_chr11_G001721	0.31	0.22	0.74	0.61	MYB4	NST1-NST2-NST3
spruce	PA_chr01_G002784	PA_chr11_G001721	0.32	0.22	0.73	0.61	MYB4	NST1-NST2-NST3
spruce	PA_chr01_G002786	PA_chr07_G004032	0.32	0.33	0.56	0.61	MYB4	VND1-VND2-VND3-VND4-VND5-VND6
spruce	PA_chr04_G002634	PA_chr08_G001160	0.26	0.29	0.65	0.61	MYB4	MYB61
spruce	PA_chr08_cUL0031_G000431	PA_chr11_G001721	0.28	0.2	0.79	0.61	MYB61	NST1-NST2-NST3
arabidopsis	MYB46	VND5	0.3	0.29	0.61	0.6	NA	NA
aspen	Potra2n10c22314	Potra2n10c20356	0.32	0.24	0.69	0.6	MYB61	NAC050
aspen	Potra2n4c9980	Potra2n10c20356	0.33	0.27	0.64	0.6	MYB4	NAC050
aspen	Potra2n7c16051	Potra2n13c25337	0.27	0.27	0.65	0.6	MYB58	VND7
aspen	Potra2n14c27236	Potra2n15c28466	0.23	0.24	0.73	0.6	MYB61	MYB61
aspen	Potra2n15c28466	Potra2n114s34556	0.28	0.26	0.67	0.6	MYB61	VND1-VND2-VND3-VND4-VND5-VND6
aspen	Potra2n7c16051	Potra2n8c16892	0.3	0.22	0.72	0.6	MYB58	NAC050
aspen	Potra2n12c24052	Potra2n7c15489	0.34	0.3	0.59	0.6	SGR5	SND2-SND3
aspen	Potra2n4c9673	Potra2n10c20356	0.32	0.25	0.68	0.6	MYB4	NAC050
spruce	PA_chr01_G002766	PA_chr08_cUL0031_G000431	0.24	0.26	0.7	0.6	MYB4	MYB61
spruce	PA_chr01_G002778	PA_chr11_G001721	0.3	0.2	0.77	0.6	MYB4	NST1-NST2-NST3
spruce	PA_chr01_G002786	PA_chr11_cUL0023_G000014	0.28	0.25	0.68	0.6	MYB4	NAC050
spruce	PA_chr02_G002184	PA_chr11_cUL0023_G000014	0.24	0.21	0.77	0.6	SGR5	NAC050
spruce	PA_chr08_G001160	PA_chr11_G001721	0.28	0.21	0.75	0.6	MYB61	NST1-NST2-NST3
spruce	PA_chr09_G004772	PA_chr11_G001721	0.26	0.19	0.79	0.6	MYB46-MYB83	NST1-NST2-NST3
arabidopsis	MYB46	VND1	0.31	0.28	0.6	0.59	NA	NA
aspen	Potra2n9c18946	Potra2n5c11773	0.33	0.28	0.6	0.59	MYB4	VND1-VND2-VND3-VND4-VND5-VND6
aspen	Potra2n10c21559	Potra2n10c20357	0.29	0.28	0.61	0.59	SGR5	NAC050
aspen	Potra2n15c28920	Potra2n13c25337	0.23	0.27	0.66	0.59	SGR5	VND7
aspen	Potra2n5c11819	Potra2n7c16511	0.31	0.26	0.64	0.59	MYB4	VND1-VND2-VND3-VND4-VND5-VND6
spruce	PA_chr01_G002758	PA_chr11_G001721	0.3	0.2	0.74	0.59	MYB4	NST1-NST2-NST3
spruce	PA_chr01_G002759	PA_chr11_G001721	0.28	0.2	0.74	0.59	MYB4	NST1-NST2-NST3
spruce	PA_chr01_G002762	PA_chr11_G001721	0.29	0.21	0.72	0.59	MYB4	NST1-NST2-NST3
spruce	PA_chr01_G002784	PA_chr07_G004032	0.32	0.31	0.56	0.59	MYB4	VND1-VND2-VND3-VND4-VND5-VND6
spruce	PA_chr01_G002784	PA_chr08_G001160	0.24	0.24	0.7	0.59	MYB4	MYB61
spruce	PA_chr01_G002786	PA_chr11_G001721	0.31	0.2	0.73	0.59	MYB4	NST1-NST2-NST3
spruce	PA_chr08_G001160	PA_chr12_G002840	0.24	0.23	0.71	0.59	MYB61	MYB4
spruce	PA_chr12_G002840	PA_chr08_cUL0031_G000431	0.24	0.23	0.72	0.59	MYB4	MYB61
spruce	PA_chr12_G002840	PA_chr11_cUL0023_G000014	0.27	0.23	0.7	0.59	MYB4	NAC050
arabidopsis	SGR5	SND3	0.31	0.27	0.61	0.58	NA	NA
aspen	Potra2n10c21559	Potra2n12c24052	0.24	0.24	0.68	0.58	SGR5	SGR5
aspen	Potra2n1c2305	Potra2n13c25337	0.27	0.26	0.64	0.58	MYB46-MYB83	VND7
aspen	Potra2n5c11819	Potra2n10c20356	0.29	0.23	0.67	0.58	MYB4	NAC050
aspen	Potra2n1c2250	Potra2n114s34556	0.28	0.23	0.68	0.58	MYB46-MYB83	VND1-VND2-VND3-VND4-VND5-VND6
aspen	Potra2n9c18946	Potra2n8c16892	0.31	0.24	0.66	0.58	MYB4	NAC050
aspen	Potra2n17c30794	Potra2n15c28920	0.25	0.24	0.69	0.58	MYB43	SGR5
aspen	Potra2n5c12813	Potra2n13c25337	0.28	0.24	0.67	0.58	MYB61	VND7
spruce	PA_chr01_G002759	PA_chr02_G002184	0.23	0.22	0.72	0.58	MYB4	SGR5
spruce	PA_chr01_G002766	PA_chr08_G001160	0.24	0.23	0.7	0.58	MYB4	MYB61
spruce	PA_chr01_G002769	PA_chr08_G001160	0.24	0.23	0.7	0.58	MYB4	MYB61
spruce	PA_chr01_G003821	PA_chr11_G001721	0.3	0.2	0.71	0.58	MYB4	NST1-NST2-NST3
spruce	PA_chr12_G002836	PA_chr07_G004032	0.32	0.31	0.53	0.58	MYB4	VND1-VND2-VND3-VND4-VND5-VND6
spruce	PA_chr12_G002836	PA_chr11_cUL0023_G000014	0.28	0.23	0.67	0.58	MYB4	NAC050
spruce	PA_chr12_G002839	PA_chr02_G002184	0.22	0.21	0.74	0.58	MYB4	SGR5
arabidopsis	MYB43	SGR5	0.26	0.23	0.66	0.57	NA	NA
arabidopsis	MYB46	VND2	0.31	0.26	0.6	0.57	NA	NA
aspen	Potra2n5c11819	Potra2n11c22498	0.29	0.25	0.63	0.57	MYB4	NST1-NST2-NST3
aspen	Potra2n15c28920	Potra2n5c11773	0.28	0.23	0.65	0.57	SGR5	VND1-VND2-VND3-VND4-VND5-VND6
aspen	Potra2n4c9199	Potra2n114s34556	0.28	0.22	0.67	0.57	MYB43	VND1-VND2-VND3-VND4-VND5-VND6
aspen	Potra2n19c34420	Potra2n10c20356	0.33	0.26	0.6	0.57	MYB4	NAC050
spruce	PA_chr01_G002778	PA_chr08_cUL0031_G000431	0.24	0.21	0.72	0.57	MYB4	MYB61
spruce	PA_chr01_G002782	PA_chr08_cUL0031_G000431	0.24	0.21	0.71	0.57	MYB4	MYB61
spruce	PA_chr01_G002782	PA_chr08_G001160	0.23	0.21	0.71	0.57	MYB4	MYB61
spruce	PA_chr01_G003821	PA_chr08_G001160	0.26	0.22	0.69	0.57	MYB4	MYB61
spruce	PA_chr12_G002839	PA_chr11_G001721	0.3	0.18	0.73	0.57	MYB4	NST1-NST2-NST3
arabidopsis	MYB4	VND7	0.31	0.27	0.57	0.56	NA	NA
arabidopsis	MYB46	SGR5	0.25	0.22	0.68	0.56	NA	NA
arabidopsis	MYB46	VND4	0.29	0.26	0.59	0.56	NA	NA
arabidopsis	MYB83	SGR5	0.24	0.2	0.7	0.56	NA	NA
aspen	Potra2n4c9673	Potra2n12c24750	0.3	0.25	0.59	0.56	MYB4	VND1-VND2-VND3-VND4-VND5-VND6
aspen	Potra2n7c16051	Potra2n5c12338	0.32	0.22	0.65	0.56	MYB58	NAC050
aspen	Potra2n9c18946	Potra2n5c12338	0.33	0.24	0.59	0.56	MYB4	NAC050
aspen	Potra2n9c18946	Potra2n8c17916	0.38	0.33	0.45	0.56	MYB4	SGR5
aspen	Potra2n14c27236	Potra2n13c25337	0.26	0.21	0.69	0.56	MYB61	VND7
aspen	Potra2n4c9980	Potra2n5c11957	0.28	0.25	0.61	0.56	MYB4	MYB58
aspen	Potra2n5c11819	Potra2n14c27236	0.25	0.2	0.7	0.56	MYB4	MYB61
aspen	Potra2n9c18946	Potra2n7c16511	0.31	0.24	0.61	0.56	MYB4	VND1-VND2-VND3-VND4-VND5-VND6
aspen	Potra2n15c28920	Potra2n1c3797	0.27	0.23	0.65	0.56	SGR5	NST1-NST2-NST3
aspen	Potra2n5c11819	Potra2n5c12338	0.32	0.23	0.62	0.56	MYB4	NAC050
aspen	Potra2n12c24052	Potra2n14c27178	0.31	0.26	0.57	0.56	SGR5	NST1-NST2-NST3
aspen	Potra2n5c11819	Potra2n8c16892	0.28	0.21	0.68	0.56	MYB4	NAC050
aspen	Potra2n9c19455	Potra2n13c25337	0.28	0.23	0.64	0.56	MYB46-MYB83	VND7
aspen	Potra2n9c19455	Potra2n1c1031	0.29	0.23	0.63	0.56	MYB46-MYB83	VND1-VND2-VND3-VND4-VND5-VND6
spruce	PA_chr01_G002758	PA_chr02_G002184	0.23	0.18	0.73	0.56	MYB4	SGR5
spruce	PA_chr01_G002769	PA_chr02_G002184	0.23	0.19	0.72	0.56	MYB4	SGR5
spruce	PA_chr01_G002778	PA_chr08_G001160	0.23	0.2	0.72	0.56	MYB4	MYB61
spruce	PA_chr01_G002784	PA_chr02_G002184	0.22	0.18	0.74	0.56	MYB4	SGR5
spruce	PA_chr01_G002784	PA_chr08_cUL0031_G000431	0.24	0.2	0.7	0.56	MYB4	MYB61
spruce	PA_chr01_G002786	PA_chr02_G002184	0.23	0.19	0.73	0.56	MYB4	SGR5
spruce	PA_chr01_G003821	PA_chr08_cUL0031_G000431	0.26	0.2	0.7	0.56	MYB4	MYB61
spruce	PA_chr12_G002836	PA_chr08_cUL0031_G000431	0.24	0.2	0.69	0.56	MYB4	MYB61
spruce	PA_chr12_G002839	PA_chr11_cUL0023_G000014	0.28	0.23	0.66	0.56	MYB4	NAC050
arabidopsis	MYB46	VND6	0.31	0.24	0.59	0.55	NA	NA
arabidopsis	MYB83	MYB46	0.3	0.2	0.66	0.55	NA	NA
aspen	Potra2n1c2250	Potra2n1c2305	0.27	0.17	0.71	0.55	MYB46-MYB83	MYB46-MYB83
aspen	Potra2n15c28920	Potra2n1c1031	0.28	0.21	0.65	0.55	SGR5	VND1-VND2-VND3-VND4-VND5-VND6
aspen	Potra2n1c2250	Potra2n13c26303	0.26	0.16	0.73	0.55	MYB46-MYB83	MYB61
aspen	Potra2n1c2250	Potra2n2c4723	0.25	0.16	0.75	0.55	MYB46-MYB83	MYB61
aspen	Potra2n4c9199	Potra2n10c20356	0.3	0.19	0.68	0.55	MYB43	NAC050
aspen	Potra2n4c9673	Potra2n1c1031	0.3	0.23	0.6	0.55	MYB4	VND1-VND2-VND3-VND4-VND5-VND6
aspen	Potra2n4c9980	Potra2n10c20357	0.32	0.3	0.5	0.55	MYB4	NAC050
aspen	Potra2n4c9980	Potra2n14c27236	0.23	0.2	0.68	0.55	MYB4	MYB61
aspen	Potra2n5c12813	Potra2n19c34420	0.25	0.24	0.61	0.55	MYB61	MYB4
aspen	Potra2n10c22314	Potra2n13c25337	0.27	0.23	0.63	0.55	MYB61	VND7
aspen	Potra2n1c2305	Potra2n10c20356	0.29	0.18	0.7	0.55	MYB46-MYB83	NAC050
aspen	Potra2n5c11819	Potra2n5c11773	0.31	0.22	0.62	0.55	MYB4	VND1-VND2-VND3-VND4-VND5-VND6
aspen	Potra2n5c11819	Potra2n5c12813	0.24	0.19	0.7	0.55	MYB4	MYB61
aspen	Potra2n5c12813	Potra2n443s35699	0.23	0.19	0.72	0.55	MYB61	MYB61
aspen	Potra2n9c18946	Potra2n11c22498	0.31	0.24	0.59	0.55	MYB4	NST1-NST2-NST3
aspen	Potra2n15c28920	Potra2n2c4785	0.28	0.21	0.65	0.55	SGR5	NST1-NST2-NST3
aspen	Potra2n1c2250	Potra2n5c11773	0.3	0.19	0.67	0.55	MYB46-MYB83	VND1-VND2-VND3-VND4-VND5-VND6
aspen	Potra2n1c2250	Potra2n5c12813	0.26	0.16	0.73	0.55	MYB46-MYB83	MYB61
aspen	Potra2n4c9673	Potra2n114s34556	0.31	0.23	0.61	0.55	MYB4	VND1-VND2-VND3-VND4-VND5-VND6
aspen	Potra2n9c18946	Potra2n14c27236	0.23	0.19	0.69	0.55	MYB4	MYB61
spruce	PA_chr01_G002758	PA_chr08_G001160	0.24	0.19	0.7	0.55	MYB4	MYB61
spruce	PA_chr01_G002762	PA_chr02_G002184	0.22	0.18	0.72	0.55	MYB4	SGR5
spruce	PA_chr01_G002766	PA_chr01_G002778	0.33	0.24	0.58	0.55	MYB4	MYB4
spruce	PA_chr01_G002769	PA_chr01_G002778	0.33	0.24	0.59	0.55	MYB4	MYB4
spruce	PA_chr01_G002782	PA_chr02_G002184	0.22	0.17	0.73	0.55	MYB4	SGR5
spruce	PA_chr01_G002782	PA_chr11_cUL0023_G000014	0.28	0.18	0.69	0.55	MYB4	NAC050
spruce	PA_chr01_G003821	PA_chr02_G002184	0.22	0.18	0.72	0.55	MYB4	SGR5
spruce	PA_chr02_G002179	PA_chr11_G001721	0.25	0.15	0.77	0.55	SGR5	NST1-NST2-NST3
spruce	PA_chr08_cUL0031_G000431	PA_chr02_G002184	0.22	0.15	0.78	0.55	MYB61	SGR5
spruce	PA_chr08_G001160	PA_chr02_G002184	0.21	0.14	0.79	0.55	MYB61	SGR5
spruce	PA_chr08_G001160	PA_chr12_G002839	0.24	0.19	0.69	0.55	MYB61	MYB4
spruce	PA_chr09_G004772	PA_chr02_G002184	0.22	0.19	0.69	0.55	MYB46-MYB83	SGR5
spruce	PA_chr12_G002839	PA_chr08_cUL0031_G000431	0.24	0.2	0.69	0.55	MYB4	MYB61
spruce	PA_chr12_G002840	PA_chr02_G002184	0.23	0.17	0.74	0.55	MYB4	SGR5
spruce	PA_chr12_G002840	PA_chr07_G004032	0.31	0.24	0.59	0.55	MYB4	VND1-VND2-VND3-VND4-VND5-VND6
arabidopsis	MYB4	VND1	0.33	0.22	0.59	0.54	NA	NA
arabidopsis	MYB4	VND2	0.32	0.23	0.59	0.54	NA	NA
arabidopsis	MYB43	NST2	0.35	0.24	0.56	0.54	NA	NA
arabidopsis	MYB46	NST1	0.32	0.23	0.58	0.54	NA	NA
aspen	Potra2n15c28920	Potra2n10c20357	0.27	0.22	0.62	0.54	SGR5	NAC050
aspen	Potra2n15c28920	Potra2n12c24750	0.27	0.22	0.63	0.54	SGR5	VND1-VND2-VND3-VND4-VND5-VND6
aspen	Potra2n1c2305	Potra2n9c19651	0.28	0.17	0.69	0.54	MYB46-MYB83	MYB46-MYB83
aspen	Potra2n2c4723	Potra2n5c11773	0.28	0.18	0.68	0.54	MYB61	VND1-VND2-VND3-VND4-VND5-VND6
aspen	Potra2n5c11957	Potra2n15c28920	0.23	0.21	0.65	0.54	MYB58	SGR5
aspen	Potra2n10c21559	Potra2n15c28920	0.22	0.2	0.68	0.54	SGR5	SGR5
aspen	Potra2n10c21559	Potra2n3c7486	0.29	0.2	0.63	0.54	SGR5	VND1-VND2-VND3-VND4-VND5-VND6
aspen	Potra2n12c24052	Potra2n10c20357	0.29	0.25	0.56	0.54	SGR5	NAC050
aspen	Potra2n14c27236	Potra2n5c11773	0.28	0.17	0.69	0.54	MYB61	VND1-VND2-VND3-VND4-VND5-VND6
aspen	Potra2n9c18946	Potra2n11c23287	0.34	0.25	0.53	0.54	MYB4	SND2-SND3
aspen	Potra2n10c21559	Potra2n5c11773	0.28	0.21	0.65	0.54	SGR5	VND1-VND2-VND3-VND4-VND5-VND6
aspen	Potra2n13c26303	Potra2n13c25337	0.28	0.19	0.66	0.54	MYB61	VND7
aspen	Potra2n15c28920	Potra2n7c16511	0.27	0.2	0.66	0.54	SGR5	VND1-VND2-VND3-VND4-VND5-VND6
aspen	Potra2n17c30794	Potra2n10c20356	0.29	0.18	0.68	0.54	MYB43	NAC050
aspen	Potra2n1c2250	Potra2n14c27236	0.24	0.15	0.74	0.54	MYB46-MYB83	MYB61
aspen	Potra2n1c2250	Potra2n15c28920	0.24	0.16	0.72	0.54	MYB46-MYB83	SGR5
aspen	Potra2n1c2250	Potra2n9c19455	0.26	0.16	0.71	0.54	MYB46-MYB83	MYB46-MYB83
aspen	Potra2n4c9673	Potra2n7c16511	0.3	0.21	0.63	0.54	MYB4	VND1-VND2-VND3-VND4-VND5-VND6
aspen	Potra2n4c9980	Potra2n5c12338	0.34	0.23	0.58	0.54	MYB4	NAC050
aspen	Potra2n5c11957	Potra2n7c16051	0.25	0.18	0.68	0.54	MYB58	MYB58
aspen	Potra2n5c12813	Potra2n14c27236	0.22	0.16	0.74	0.54	MYB61	MYB61
aspen	Potra2n9c18946	Potra2n2c4785	0.33	0.23	0.58	0.54	MYB4	NST1-NST2-NST3
aspen	Potra2n9c19455	Potra2n12c24750	0.29	0.21	0.63	0.54	MYB46-MYB83	VND1-VND2-VND3-VND4-VND5-VND6
aspen	Potra2n10c21559	Potra2n14c27178	0.28	0.21	0.64	0.54	SGR5	NST1-NST2-NST3
aspen	Potra2n10c21559	Potra2n1c3797	0.27	0.19	0.66	0.54	SGR5	NST1-NST2-NST3
aspen	Potra2n15c28920	Potra2n114s34556	0.25	0.19	0.66	0.54	SGR5	VND1-VND2-VND3-VND4-VND5-VND6
aspen	Potra2n15c28920	Potra2n11c22498	0.27	0.2	0.66	0.54	SGR5	NST1-NST2-NST3
aspen	Potra2n19c34420	Potra2n3c7486	0.34	0.28	0.5	0.54	MYB4	VND1-VND2-VND3-VND4-VND5-VND6
aspen	Potra2n1c2250	Potra2n9c19651	0.26	0.17	0.71	0.54	MYB46-MYB83	MYB46-MYB83
aspen	Potra2n4c9199	Potra2n5c11773	0.32	0.2	0.63	0.54	MYB43	VND1-VND2-VND3-VND4-VND5-VND6
aspen	Potra2n4c9980	Potra2n7c16511	0.32	0.22	0.6	0.54	MYB4	VND1-VND2-VND3-VND4-VND5-VND6
aspen	Potra2n5c11819	Potra2n1c3797	0.3	0.23	0.61	0.54	MYB4	NST1-NST2-NST3
aspen	Potra2n5c12813	Potra2n15c28466	0.23	0.17	0.72	0.54	MYB61	MYB61
aspen	Potra2n5c12813	Potra2n5c11773	0.29	0.18	0.67	0.54	MYB61	VND1-VND2-VND3-VND4-VND5-VND6
spruce	PA_chr01_G002758	PA_chr08_cUL0031_G000431	0.26	0.17	0.7	0.54	MYB4	MYB61
spruce	PA_chr01_G002758	PA_chr11_cUL0023_G000014	0.27	0.19	0.68	0.54	MYB4	NAC050
spruce	PA_chr01_G002759	PA_chr02_G002179	0.27	0.23	0.62	0.54	MYB4	SGR5
spruce	PA_chr01_G002766	PA_chr02_G002184	0.22	0.18	0.71	0.54	MYB4	SGR5
spruce	PA_chr01_G002778	PA_chr11_cUL0023_G000014	0.27	0.17	0.7	0.54	MYB4	NAC050
spruce	PA_chr01_G003821	PA_chr11_cUL0023_G000014	0.27	0.18	0.68	0.54	MYB4	NAC050
spruce	PA_chr02_G002184	PA_chr07_G004032	0.24	0.15	0.73	0.54	SGR5	VND1-VND2-VND3-VND4-VND5-VND6
spruce	PA_chr08_G001160	PA_chr08_cUL0031_G000431	0.21	0.14	0.78	0.54	MYB61	MYB61
spruce	PA_chr08_G001160	PA_chr12_G002836	0.23	0.18	0.7	0.54	MYB61	MYB4
spruce	PA_chr12_G002836	PA_chr02_G002184	0.22	0.17	0.72	0.54	MYB4	SGR5
arabidopsis	MYB43	NST1	0.33	0.22	0.58	0.53	NA	NA
arabidopsis	MYB46	VND7	0.32	0.23	0.58	0.53	NA	NA
arabidopsis	MYB61	MYB46	0.26	0.19	0.65	0.53	NA	NA
arabidopsis	MYB83	VND1	0.3	0.19	0.64	0.53	NA	NA
arabidopsis	MYB83	VND5	0.29	0.19	0.64	0.53	NA	NA
arabidopsis	SGR5	NST2	0.29	0.2	0.61	0.53	NA	NA
arabidopsis	SGR5	SND2	0.32	0.23	0.56	0.53	NA	NA
aspen	Potra2n10c21559	Potra2n11c22498	0.27	0.19	0.66	0.53	SGR5	NST1-NST2-NST3
aspen	Potra2n15c28466	Potra2n8c16892	0.26	0.15	0.72	0.53	MYB61	NAC050
aspen	Potra2n15c28920	Potra2n3c7486	0.28	0.2	0.63	0.53	SGR5	VND1-VND2-VND3-VND4-VND5-VND6
aspen	Potra2n17c30794	Potra2n5c11773	0.32	0.2	0.62	0.53	MYB43	VND1-VND2-VND3-VND4-VND5-VND6
aspen	Potra2n19c34420	Potra2n1c1031	0.33	0.27	0.5	0.53	MYB4	VND1-VND2-VND3-VND4-VND5-VND6
aspen	Potra2n1c2305	Potra2n1c1031	0.29	0.2	0.63	0.53	MYB46-MYB83	VND1-VND2-VND3-VND4-VND5-VND6
aspen	Potra2n4c9199	Potra2n8c16892	0.28	0.16	0.69	0.53	MYB43	NAC050
aspen	Potra2n4c9980	Potra2n2c4785	0.33	0.24	0.55	0.53	MYB4	NST1-NST2-NST3
aspen	Potra2n5c11819	Potra2n2c4785	0.32	0.22	0.58	0.53	MYB4	NST1-NST2-NST3
aspen	Potra2n5c12813	Potra2n8c16892	0.27	0.15	0.71	0.53	MYB61	NAC050
aspen	Potra2n10c22314	Potra2n10c20357	0.29	0.22	0.58	0.53	MYB61	NAC050
aspen	Potra2n12c24052	Potra2n3c7486	0.31	0.22	0.59	0.53	SGR5	VND1-VND2-VND3-VND4-VND5-VND6
aspen	Potra2n13c26303	Potra2n443s35699	0.23	0.16	0.72	0.53	MYB61	MYB61
aspen	Potra2n2c4723	Potra2n8c16892	0.27	0.14	0.73	0.53	MYB61	NAC050
aspen	Potra2n443s35699	Potra2n10c20356	0.29	0.16	0.7	0.53	MYB61	NAC050
aspen	Potra2n4c9199	Potra2n2c4785	0.33	0.2	0.6	0.53	MYB43	NST1-NST2-NST3
aspen	Potra2n5c12813	Potra2n9c18946	0.24	0.2	0.66	0.53	MYB61	MYB4
aspen	Potra2n9c18946	Potra2n1c3797	0.31	0.21	0.6	0.53	MYB4	NST1-NST2-NST3
aspen	Potra2n9c19455	Potra2n114s34556	0.28	0.19	0.64	0.53	MYB46-MYB83	VND1-VND2-VND3-VND4-VND5-VND6
aspen	Potra2n9c19651	Potra2n13c25337	0.27	0.21	0.63	0.53	MYB46-MYB83	VND7
aspen	Potra2n10c21559	Potra2n1c1031	0.28	0.2	0.63	0.53	SGR5	VND1-VND2-VND3-VND4-VND5-VND6
aspen	Potra2n13c26303	Potra2n5c11773	0.29	0.17	0.67	0.53	MYB61	VND1-VND2-VND3-VND4-VND5-VND6
aspen	Potra2n15c28920	Potra2n14c27178	0.28	0.19	0.64	0.53	SGR5	NST1-NST2-NST3
aspen	Potra2n19c34420	Potra2n114s34556	0.33	0.25	0.52	0.53	MYB4	VND1-VND2-VND3-VND4-VND5-VND6
aspen	Potra2n19c34420	Potra2n11c22498	0.32	0.25	0.53	0.53	MYB4	NST1-NST2-NST3
aspen	Potra2n4c9199	Potra2n3c7486	0.33	0.2	0.6	0.53	MYB43	VND1-VND2-VND3-VND4-VND5-VND6
aspen	Potra2n4c9673	Potra2n8c16892	0.29	0.18	0.66	0.53	MYB4	NAC050
aspen	Potra2n4c9980	Potra2n5c12813	0.23	0.19	0.67	0.53	MYB4	MYB61
aspen	Potra2n10c21559	Potra2n7c16511	0.28	0.19	0.65	0.53	SGR5	VND1-VND2-VND3-VND4-VND5-VND6
aspen	Potra2n13c26303	Potra2n8c16892	0.26	0.15	0.72	0.53	MYB61	NAC050
aspen	Potra2n17c30794	Potra2n3c7486	0.32	0.19	0.62	0.53	MYB43	VND1-VND2-VND3-VND4-VND5-VND6
aspen	Potra2n2c4723	Potra2n14c27236	0.22	0.14	0.76	0.53	MYB61	MYB61
aspen	Potra2n5c11819	Potra2n14c27178	0.32	0.21	0.59	0.53	MYB4	NST1-NST2-NST3
aspen	Potra2n5c12813	Potra2n5c12338	0.27	0.17	0.68	0.53	MYB61	NAC050
aspen	Potra2n8c17916	Potra2n10c20356	0.32	0.19	0.62	0.53	SGR5	NAC050
spruce	PA_chr01_G002759	PA_chr08_cUL0031_G000431	0.23	0.16	0.7	0.53	MYB4	MYB61
spruce	PA_chr01_G002759	PA_chr11_cUL0023_G000014	0.27	0.16	0.69	0.53	MYB4	NAC050
spruce	PA_chr01_G002762	PA_chr08_cUL0031_G000431	0.23	0.17	0.7	0.53	MYB4	MYB61
spruce	PA_chr01_G002766	PA_chr02_G002179	0.28	0.2	0.62	0.53	MYB4	SGR5
spruce	PA_chr01_G002769	PA_chr07_G004032	0.31	0.24	0.56	0.53	MYB4	VND1-VND2-VND3-VND4-VND5-VND6
spruce	PA_chr01_G002778	PA_chr02_G002184	0.22	0.14	0.74	0.53	MYB4	SGR5
spruce	PA_chr02_G002179	PA_chr02_G002184	0.21	0.14	0.76	0.53	SGR5	SGR5
spruce	PA_chr08_cUL0031_G000431	PA_chr02_G002179	0.25	0.15	0.73	0.53	MYB61	SGR5
spruce	PA_chr08_cUL0031_G000431	PA_chr11_cUL0023_G000014	0.25	0.13	0.76	0.53	MYB61	NAC050
spruce	PA_chr08_G001160	PA_chr02_G002179	0.24	0.15	0.73	0.53	MYB61	SGR5
spruce	PA_chr08_G001160	PA_chr11_cUL0023_G000014	0.25	0.13	0.76	0.53	MYB61	NAC050
arabidopsis	MYB4	NST3	0.32	0.22	0.57	0.52	NA	NA
arabidopsis	MYB4	VND3	0.34	0.23	0.53	0.52	NA	NA
arabidopsis	MYB61	NST1	0.31	0.19	0.62	0.52	NA	NA
aspen	Potra2n10c21559	Potra2n10c20356	0.27	0.14	0.7	0.52	SGR5	NAC050
aspen	Potra2n10c21559	Potra2n114s34556	0.26	0.19	0.63	0.52	SGR5	VND1-VND2-VND3-VND4-VND5-VND6
aspen	Potra2n10c21559	Potra2n2c4785	0.28	0.17	0.65	0.52	SGR5	NST1-NST2-NST3
aspen	Potra2n13c26303	Potra2n10c20356	0.27	0.15	0.7	0.52	MYB61	NAC050
aspen	Potra2n14c27236	Potra2n443s35699	0.22	0.14	0.73	0.52	MYB61	MYB61
aspen	Potra2n1c2250	Potra2n10c21559	0.22	0.15	0.71	0.52	MYB46-MYB83	SGR5
aspen	Potra2n2c4723	Potra2n15c28466	0.22	0.13	0.73	0.52	MYB61	MYB61
aspen	Potra2n2c4723	Potra2n9c19651	0.24	0.13	0.73	0.52	MYB61	MYB46-MYB83
aspen	Potra2n4c9673	Potra2n14c27236	0.23	0.15	0.71	0.52	MYB4	MYB61
aspen	Potra2n4c9673	Potra2n3c7486	0.31	0.21	0.58	0.52	MYB4	VND1-VND2-VND3-VND4-VND5-VND6
aspen	Potra2n4c9980	Potra2n11c22498	0.32	0.21	0.57	0.52	MYB4	NST1-NST2-NST3
aspen	Potra2n5c12813	Potra2n10c22314	0.23	0.14	0.71	0.52	MYB61	MYB61
aspen	Potra2n9c19651	Potra2n14c27236	0.24	0.13	0.73	0.52	MYB46-MYB83	MYB61
aspen	Potra2n9c19651	Potra2n15c28920	0.23	0.16	0.7	0.52	MYB46-MYB83	SGR5
aspen	Potra2n10c21559	Potra2n12c24750	0.27	0.18	0.64	0.52	SGR5	VND1-VND2-VND3-VND4-VND5-VND6
aspen	Potra2n10c22314	Potra2n4c8837	0.3	0.21	0.59	0.52	MYB61	SND2-SND3
aspen	Potra2n12c24052	Potra2n15c28920	0.2	0.15	0.71	0.52	SGR5	SGR5
aspen	Potra2n13c26303	Potra2n15c28920	0.23	0.16	0.69	0.52	MYB61	SGR5
aspen	Potra2n1c2250	Potra2n10c20356	0.28	0.13	0.71	0.52	MYB46-MYB83	NAC050
aspen	Potra2n2c4723	Potra2n11c23287	0.29	0.17	0.65	0.52	MYB61	SND2-SND3
aspen	Potra2n5c11957	Potra2n5c12338	0.29	0.17	0.66	0.52	MYB58	NAC050
aspen	Potra2n5c12813	Potra2n10c20356	0.27	0.14	0.71	0.52	MYB61	NAC050
aspen	Potra2n8c17916	Potra2n5c11773	0.36	0.24	0.52	0.52	SGR5	VND1-VND2-VND3-VND4-VND5-VND6
aspen	Potra2n9c18946	Potra2n14c27178	0.33	0.21	0.56	0.52	MYB4	NST1-NST2-NST3
aspen	Potra2n14c27236	Potra2n8c16892	0.26	0.14	0.72	0.52	MYB61	NAC050
aspen	Potra2n1c2250	Potra2n3c7486	0.29	0.16	0.66	0.52	MYB46-MYB83	VND1-VND2-VND3-VND4-VND5-VND6
aspen	Potra2n1c2250	Potra2n443s35699	0.25	0.14	0.72	0.52	MYB46-MYB83	MYB61
aspen	Potra2n1c2305	Potra2n114s34556	0.28	0.18	0.64	0.52	MYB46-MYB83	VND1-VND2-VND3-VND4-VND5-VND6
aspen	Potra2n1c2305	Potra2n2c4723	0.24	0.13	0.73	0.52	MYB46-MYB83	MYB61
aspen	Potra2n2c4723	Potra2n12c24052	0.24	0.15	0.7	0.52	MYB61	SGR5
aspen	Potra2n4c9980	Potra2n5c11773	0.33	0.21	0.58	0.52	MYB4	VND1-VND2-VND3-VND4-VND5-VND6
aspen	Potra2n9c19455	Potra2n14c27236	0.23	0.14	0.73	0.52	MYB46-MYB83	MYB61
aspen	Potra2n9c19651	Potra2n10c21559	0.23	0.16	0.68	0.52	MYB46-MYB83	SGR5
aspen	Potra2n10c21559	Potra2n8c16892	0.27	0.14	0.7	0.52	SGR5	NAC050
aspen	Potra2n12c24052	Potra2n8c16892	0.27	0.15	0.7	0.52	SGR5	NAC050
aspen	Potra2n14c27236	Potra2n10c20356	0.27	0.13	0.73	0.52	MYB61	NAC050
aspen	Potra2n14c27236	Potra2n11c22498	0.26	0.15	0.68	0.52	MYB61	NST1-NST2-NST3
aspen	Potra2n14c27236	Potra2n19c34420	0.26	0.19	0.63	0.52	MYB61	MYB4
aspen	Potra2n15c28920	Potra2n10c20356	0.26	0.14	0.71	0.52	SGR5	NAC050
aspen	Potra2n1c2250	Potra2n15c28466	0.25	0.14	0.72	0.52	MYB46-MYB83	MYB61
aspen	Potra2n1c2305	Potra2n12c24750	0.29	0.19	0.62	0.52	MYB46-MYB83	VND1-VND2-VND3-VND4-VND5-VND6
aspen	Potra2n2c4723	Potra2n443s35699	0.22	0.13	0.73	0.52	MYB61	MYB61
aspen	Potra2n2c4723	Potra2n4c8837	0.28	0.17	0.65	0.52	MYB61	SND2-SND3
aspen	Potra2n2c4723	Potra2n9c19455	0.24	0.13	0.72	0.52	MYB61	MYB46-MYB83
aspen	Potra2n4c9980	Potra2n11c23287	0.35	0.25	0.51	0.52	MYB4	SND2-SND3
aspen	Potra2n5c11819	Potra2n7c16051	0.26	0.15	0.69	0.52	MYB4	MYB58
aspen	Potra2n5c12813	Potra2n9c19651	0.26	0.15	0.71	0.52	MYB61	MYB46-MYB83
aspen	Potra2n9c19651	Potra2n10c20356	0.29	0.15	0.7	0.52	MYB46-MYB83	NAC050
aspen	Potra2n9c19651	Potra2n13c26303	0.25	0.15	0.71	0.52	MYB46-MYB83	MYB61
spruce	PA_chr01_G002759	PA_chr08_G001160	0.23	0.15	0.7	0.52	MYB4	MYB61
spruce	PA_chr01_G002762	PA_chr08_G001160	0.23	0.16	0.7	0.52	MYB4	MYB61
spruce	PA_chr01_G002762	PA_chr11_cUL0023_G000014	0.27	0.15	0.68	0.52	MYB4	NAC050
spruce	PA_chr01_G002766	PA_chr07_G004032	0.31	0.23	0.55	0.52	MYB4	VND1-VND2-VND3-VND4-VND5-VND6
spruce	PA_chr01_G002782	PA_chr02_G002179	0.27	0.19	0.63	0.52	MYB4	SGR5
spruce	PA_chr08_G001160	PA_chr07_G004032	0.26	0.15	0.69	0.52	MYB61	VND1-VND2-VND3-VND4-VND5-VND6
spruce	PA_chr09_G004772	PA_chr11_cUL0023_G000014	0.26	0.17	0.67	0.52	MYB46-MYB83	NAC050
arabidopsis	MYB4	NST1	0.31	0.2	0.57	0.51	NA	NA
arabidopsis	MYB4	SGR5	0.23	0.16	0.67	0.51	NA	NA
arabidopsis	MYB83	VND2	0.29	0.16	0.65	0.51	NA	NA
arabidopsis	MYB83	VND4	0.28	0.17	0.64	0.51	NA	NA
arabidopsis	MYB83	VND6	0.29	0.17	0.63	0.51	NA	NA
arabidopsis	SGR5	NAC050	0.26	0.19	0.6	0.51	NA	NA
arabidopsis	SGR5	NST1	0.28	0.19	0.6	0.51	NA	NA
aspen	Potra2n12c24052	Potra2n10c20356	0.27	0.14	0.68	0.51	SGR5	NAC050
aspen	Potra2n13c26303	Potra2n11c22498	0.27	0.15	0.67	0.51	MYB61	NST1-NST2-NST3
aspen	Potra2n13c26303	Potra2n12c24052	0.24	0.14	0.71	0.51	MYB61	SGR5
aspen	Potra2n13c26303	Potra2n19c34420	0.26	0.18	0.62	0.51	MYB61	MYB4
aspen	Potra2n14c27236	Potra2n12c24750	0.27	0.14	0.68	0.51	MYB61	VND1-VND2-VND3-VND4-VND5-VND6
aspen	Potra2n14c27236	Potra2n15c28920	0.22	0.12	0.74	0.51	MYB61	SGR5
aspen	Potra2n15c28466	Potra2n10c21559	0.23	0.13	0.71	0.51	MYB61	SGR5
aspen	Potra2n1c2250	Potra2n17c30794	0.25	0.14	0.7	0.51	MYB46-MYB83	MYB43
aspen	Potra2n1c2250	Potra2n8c16892	0.27	0.12	0.72	0.51	MYB46-MYB83	NAC050
aspen	Potra2n1c2305	Potra2n5c12813	0.24	0.13	0.72	0.51	MYB46-MYB83	MYB61
aspen	Potra2n2c4723	Potra2n4c9673	0.24	0.14	0.7	0.51	MYB61	MYB4
aspen	Potra2n2c4723	Potra2n5c12813	0.22	0.12	0.74	0.51	MYB61	MYB61
aspen	Potra2n443s35699	Potra2n8c16892	0.27	0.13	0.71	0.51	MYB61	NAC050
aspen	Potra2n4c9199	Potra2n7c16051	0.25	0.15	0.69	0.51	MYB43	MYB58
aspen	Potra2n5c11819	Potra2n13c26303	0.25	0.15	0.7	0.51	MYB4	MYB61
aspen	Potra2n5c11957	Potra2n14c27236	0.22	0.12	0.74	0.51	MYB58	MYB61
aspen	Potra2n7c16051	Potra2n5c11773	0.3	0.15	0.66	0.51	MYB58	VND1-VND2-VND3-VND4-VND5-VND6
aspen	Potra2n9c19455	Potra2n8c16892	0.28	0.13	0.7	0.51	MYB46-MYB83	NAC050
aspen	Potra2n10c22314	Potra2n14c27236	0.23	0.13	0.71	0.51	MYB61	MYB61
aspen	Potra2n13c26303	Potra2n4c8837	0.28	0.18	0.63	0.51	MYB61	SND2-SND3
aspen	Potra2n14c27236	Potra2n5c12338	0.28	0.14	0.68	0.51	MYB61	NAC050
aspen	Potra2n15c28466	Potra2n10c20356	0.28	0.14	0.69	0.51	MYB61	NAC050
aspen	Potra2n17c30794	Potra2n8c16892	0.28	0.14	0.68	0.51	MYB43	NAC050
aspen	Potra2n1c2305	Potra2n8c16892	0.28	0.13	0.71	0.51	MYB46-MYB83	NAC050
aspen	Potra2n2c4723	Potra2n7c16051	0.23	0.14	0.71	0.51	MYB61	MYB58
aspen	Potra2n2c4723	Potra2n7c16511	0.27	0.14	0.68	0.51	MYB61	VND1-VND2-VND3-VND4-VND5-VND6
aspen	Potra2n4c9199	Potra2n11c22498	0.3	0.18	0.62	0.51	MYB43	NST1-NST2-NST3
aspen	Potra2n4c9673	Potra2n5c12813	0.24	0.14	0.69	0.51	MYB4	MYB61
aspen	Potra2n5c11819	Potra2n15c28920	0.24	0.16	0.66	0.51	MYB4	SGR5
aspen	Potra2n5c11819	Potra2n4c8837	0.32	0.2	0.57	0.51	MYB4	SND2-SND3
aspen	Potra2n5c11819	Potra2n5c11957	0.25	0.14	0.68	0.51	MYB4	MYB58
aspen	Potra2n5c12813	Potra2n12c24052	0.24	0.14	0.69	0.51	MYB61	SGR5
aspen	Potra2n9c19455	Potra2n13c26303	0.25	0.13	0.71	0.51	MYB46-MYB83	MYB61
aspen	Potra2n12c24052	Potra2n5c11773	0.31	0.18	0.62	0.51	SGR5	VND1-VND2-VND3-VND4-VND5-VND6
aspen	Potra2n14c27236	Potra2n10c21559	0.22	0.12	0.72	0.51	MYB61	SGR5
aspen	Potra2n14c27236	Potra2n11c23287	0.28	0.16	0.65	0.51	MYB61	SND2-SND3
aspen	Potra2n17c30794	Potra2n114s34556	0.3	0.17	0.62	0.51	MYB43	VND1-VND2-VND3-VND4-VND5-VND6
aspen	Potra2n1c2250	Potra2n12c24750	0.28	0.17	0.65	0.51	MYB46-MYB83	VND1-VND2-VND3-VND4-VND5-VND6
aspen	Potra2n1c2250	Potra2n5c11957	0.24	0.12	0.72	0.51	MYB46-MYB83	MYB58
aspen	Potra2n2c4723	Potra2n114s34556	0.26	0.14	0.69	0.51	MYB61	VND1-VND2-VND3-VND4-VND5-VND6
aspen	Potra2n2c4723	Potra2n5c11819	0.23	0.14	0.71	0.51	MYB61	MYB4
aspen	Potra2n2c4723	Potra2n9c18946	0.23	0.15	0.69	0.51	MYB61	MYB4
aspen	Potra2n443s35699	Potra2n15c28920	0.22	0.13	0.71	0.51	MYB61	SGR5
aspen	Potra2n4c9199	Potra2n14c27236	0.24	0.13	0.71	0.51	MYB43	MYB61
aspen	Potra2n4c9199	Potra2n15c28920	0.24	0.16	0.68	0.51	MYB43	SGR5
aspen	Potra2n4c9673	Potra2n11c23287	0.33	0.19	0.57	0.51	MYB4	SND2-SND3
aspen	Potra2n5c11819	Potra2n7c15489	0.33	0.22	0.52	0.51	MYB4	SND2-SND3
aspen	Potra2n5c12813	Potra2n15c28920	0.22	0.13	0.72	0.51	MYB61	SGR5
aspen	Potra2n5c12813	Potra2n9c19455	0.24	0.13	0.72	0.51	MYB61	MYB46-MYB83
aspen	Potra2n9c18946	Potra2n13c26303	0.24	0.16	0.67	0.51	MYB4	MYB61
aspen	Potra2n9c19651	Potra2n8c16892	0.28	0.14	0.7	0.51	MYB46-MYB83	NAC050
aspen	Potra2n13c26303	Potra2n10c21559	0.23	0.13	0.72	0.51	MYB61	SGR5
aspen	Potra2n13c26303	Potra2n11c23287	0.3	0.19	0.6	0.51	MYB61	SND2-SND3
aspen	Potra2n13c26303	Potra2n17c30794	0.24	0.13	0.7	0.51	MYB61	MYB43
aspen	Potra2n13c26303	Potra2n7c16511	0.27	0.14	0.69	0.51	MYB61	VND1-VND2-VND3-VND4-VND5-VND6
aspen	Potra2n14c27236	Potra2n114s34556	0.26	0.15	0.67	0.51	MYB61	VND1-VND2-VND3-VND4-VND5-VND6
aspen	Potra2n1c2305	Potra2n14c27236	0.24	0.12	0.73	0.51	MYB46-MYB83	MYB61
aspen	Potra2n1c2305	Potra2n9c19455	0.26	0.15	0.69	0.51	MYB46-MYB83	MYB46-MYB83
aspen	Potra2n2c4723	Potra2n15c28920	0.23	0.13	0.73	0.51	MYB61	SGR5
aspen	Potra2n2c4723	Potra2n4c9199	0.24	0.13	0.72	0.51	MYB61	MYB43
aspen	Potra2n443s35699	Potra2n5c11773	0.3	0.16	0.64	0.51	MYB61	VND1-VND2-VND3-VND4-VND5-VND6
aspen	Potra2n4c9673	Potra2n11c22498	0.29	0.18	0.61	0.51	MYB4	NST1-NST2-NST3
aspen	Potra2n5c11819	Potra2n11c23287	0.32	0.2	0.57	0.51	MYB4	SND2-SND3
aspen	Potra2n5c11957	Potra2n12c24052	0.24	0.15	0.69	0.51	MYB58	SGR5
aspen	Potra2n5c11957	Potra2n13c26303	0.23	0.13	0.72	0.51	MYB58	MYB61
aspen	Potra2n7c16051	Potra2n12c24750	0.3	0.16	0.64	0.51	MYB58	VND1-VND2-VND3-VND4-VND5-VND6
aspen	Potra2n7c16051	Potra2n14c27236	0.23	0.12	0.74	0.51	MYB58	MYB61
aspen	Potra2n9c19651	Potra2n11c22498	0.28	0.16	0.65	0.51	MYB46-MYB83	NST1-NST2-NST3
spruce	PA_chr01_G002782	PA_chr07_G004032	0.3	0.21	0.56	0.51	MYB4	VND1-VND2-VND3-VND4-VND5-VND6
spruce	PA_chr01_G002784	PA_chr02_G002179	0.27	0.17	0.63	0.51	MYB4	SGR5
spruce	PA_chr08_cUL0031_G000431	PA_chr07_G004032	0.26	0.15	0.69	0.51	MYB61	VND1-VND2-VND3-VND4-VND5-VND6
spruce	PA_chr08_G001160	PA_chr09_G004772	0.23	0.17	0.66	0.51	MYB61	MYB46-MYB83
spruce	PA_chr09_G004772	PA_chr08_cUL0031_G000431	0.24	0.2	0.61	0.51	MYB46-MYB83	MYB61
spruce	PA_chr12_G002839	PA_chr07_G004032	0.33	0.23	0.53	0.51	MYB4	VND1-VND2-VND3-VND4-VND5-VND6
arabidopsis	MYB4	SND2	0.35	0.23	0.49	0.5	NA	NA
arabidopsis	MYB43	NST3	0.3	0.17	0.59	0.5	NA	NA
arabidopsis	MYB43	VND2	0.31	0.16	0.61	0.5	NA	NA
arabidopsis	MYB58	MYB83	0.25	0.16	0.66	0.5	NA	NA
arabidopsis	MYB58	NST2	0.35	0.2	0.54	0.5	NA	NA
arabidopsis	MYB61	MYB43	0.26	0.15	0.67	0.5	NA	NA
arabidopsis	MYB61	MYB83	0.25	0.13	0.7	0.5	NA	NA
arabidopsis	MYB61	VND1	0.3	0.15	0.63	0.5	NA	NA
arabidopsis	SGR5	VND1	0.27	0.14	0.66	0.5	NA	NA
arabidopsis	SGR5	VND6	0.27	0.16	0.64	0.5	NA	NA
arabidopsis	SGR5	VND7	0.27	0.15	0.64	0.5	NA	NA
aspen	Potra2n10c22314	Potra2n114s34556	0.27	0.15	0.64	0.5	MYB61	VND1-VND2-VND3-VND4-VND5-VND6
aspen	Potra2n12c24052	Potra2n11c22498	0.29	0.17	0.61	0.5	SGR5	NST1-NST2-NST3
aspen	Potra2n14c27236	Potra2n4c8837	0.27	0.15	0.65	0.5	MYB61	SND2-SND3
aspen	Potra2n1c2250	Potra2n10c22314	0.25	0.13	0.7	0.5	MYB46-MYB83	MYB61
aspen	Potra2n1c2250	Potra2n11c23287	0.3	0.15	0.63	0.5	MYB46-MYB83	SND2-SND3
aspen	Potra2n1c2250	Potra2n7c16051	0.23	0.12	0.72	0.5	MYB46-MYB83	MYB58
aspen	Potra2n2c4723	Potra2n5c12338	0.27	0.13	0.69	0.5	MYB61	NAC050
aspen	Potra2n4c9199	Potra2n10c21559	0.24	0.14	0.68	0.5	MYB43	SGR5
aspen	Potra2n4c9199	Potra2n1c3797	0.3	0.16	0.63	0.5	MYB43	NST1-NST2-NST3
aspen	Potra2n4c9673	Potra2n4c8837	0.33	0.2	0.56	0.5	MYB4	SND2-SND3
aspen	Potra2n4c9673	Potra2n5c11957	0.24	0.14	0.67	0.5	MYB4	MYB58
aspen	Potra2n4c9980	Potra2n13c26303	0.25	0.16	0.64	0.5	MYB4	MYB61
aspen	Potra2n5c11819	Potra2n17c31797	0.33	0.21	0.53	0.5	MYB4	SND2-SND3
aspen	Potra2n5c12813	Potra2n10c21559	0.22	0.12	0.72	0.5	MYB61	SGR5
aspen	Potra2n5c12813	Potra2n7c16051	0.23	0.12	0.72	0.5	MYB61	MYB58
aspen	Potra2n5c12813	Potra2n7c16511	0.27	0.13	0.68	0.5	MYB61	VND1-VND2-VND3-VND4-VND5-VND6
aspen	Potra2n9c19651	Potra2n12c24750	0.29	0.17	0.62	0.5	MYB46-MYB83	VND1-VND2-VND3-VND4-VND5-VND6
aspen	Potra2n9c19651	Potra2n443s35699	0.25	0.13	0.7	0.5	MYB46-MYB83	MYB61
aspen	Potra2n10c22314	Potra2n15c28920	0.22	0.12	0.71	0.5	MYB61	SGR5
aspen	Potra2n12c24052	Potra2n4c8837	0.29	0.17	0.6	0.5	SGR5	SND2-SND3
aspen	Potra2n13c26303	Potra2n12c24750	0.27	0.14	0.66	0.5	MYB61	VND1-VND2-VND3-VND4-VND5-VND6
aspen	Potra2n13c26303	Potra2n14c27236	0.21	0.11	0.75	0.5	MYB61	MYB61
aspen	Potra2n14c27236	Potra2n1c1031	0.27	0.13	0.68	0.5	MYB61	VND1-VND2-VND3-VND4-VND5-VND6
aspen	Potra2n15c28466	Potra2n11c22498	0.27	0.14	0.65	0.5	MYB61	NST1-NST2-NST3
aspen	Potra2n17c30794	Potra2n10c21559	0.24	0.14	0.68	0.5	MYB43	SGR5
aspen	Potra2n17c30794	Potra2n1c3797	0.29	0.15	0.64	0.5	MYB43	NST1-NST2-NST3
aspen	Potra2n19c34420	Potra2n11c23287	0.35	0.25	0.46	0.5	MYB4	SND2-SND3
aspen	Potra2n1c2250	Potra2n12c24052	0.22	0.16	0.66	0.5	MYB46-MYB83	SGR5
aspen	Potra2n1c2250	Potra2n17c31797	0.31	0.19	0.58	0.5	MYB46-MYB83	SND2-SND3
aspen	Potra2n1c2250	Potra2n5c11819	0.28	0.13	0.69	0.5	MYB46-MYB83	MYB4
aspen	Potra2n1c2250	Potra2n9c18946	0.25	0.15	0.66	0.5	MYB46-MYB83	MYB4
aspen	Potra2n1c2305	Potra2n10c22314	0.25	0.13	0.69	0.5	MYB46-MYB83	MYB61
aspen	Potra2n1c2305	Potra2n7c16511	0.29	0.15	0.66	0.5	MYB46-MYB83	VND1-VND2-VND3-VND4-VND5-VND6
aspen	Potra2n2c4723	Potra2n10c21559	0.23	0.12	0.72	0.5	MYB61	SGR5
aspen	Potra2n2c4723	Potra2n10c22314	0.23	0.11	0.73	0.5	MYB61	MYB61
aspen	Potra2n2c4723	Potra2n17c30794	0.24	0.12	0.72	0.5	MYB61	MYB43
aspen	Potra2n2c4723	Potra2n1c3797	0.26	0.12	0.69	0.5	MYB61	NST1-NST2-NST3
aspen	Potra2n443s35699	Potra2n114s34556	0.27	0.15	0.65	0.5	MYB61	VND1-VND2-VND3-VND4-VND5-VND6
aspen	Potra2n4c9199	Potra2n13c26303	0.24	0.13	0.7	0.5	MYB43	MYB61
aspen	Potra2n5c11819	Potra2n443s35699	0.26	0.15	0.66	0.5	MYB4	MYB61
aspen	Potra2n5c11957	Potra2n5c11773	0.3	0.14	0.65	0.5	MYB58	VND1-VND2-VND3-VND4-VND5-VND6
aspen	Potra2n5c11957	Potra2n5c12813	0.23	0.11	0.73	0.5	MYB58	MYB61
aspen	Potra2n5c12813	Potra2n114s34556	0.26	0.14	0.67	0.5	MYB61	VND1-VND2-VND3-VND4-VND5-VND6
aspen	Potra2n5c12813	Potra2n13c26303	0.22	0.11	0.73	0.5	MYB61	MYB61
aspen	Potra2n7c16051	Potra2n10c21559	0.22	0.13	0.7	0.5	MYB58	SGR5
aspen	Potra2n9c19455	Potra2n10c20356	0.28	0.13	0.69	0.5	MYB46-MYB83	NAC050
aspen	Potra2n9c19455	Potra2n11c22498	0.29	0.15	0.65	0.5	MYB46-MYB83	NST1-NST2-NST3
aspen	Potra2n9c19651	Potra2n15c28466	0.25	0.12	0.69	0.5	MYB46-MYB83	MYB61
aspen	Potra2n13c26303	Potra2n15c28466	0.23	0.11	0.72	0.5	MYB61	MYB61
aspen	Potra2n13c26303	Potra2n5c12338	0.27	0.13	0.67	0.5	MYB61	NAC050
aspen	Potra2n14c27236	Potra2n17c30794	0.23	0.12	0.72	0.5	MYB61	MYB43
aspen	Potra2n14c27236	Potra2n7c16511	0.27	0.13	0.69	0.5	MYB61	VND1-VND2-VND3-VND4-VND5-VND6
aspen	Potra2n15c28466	Potra2n15c28920	0.22	0.13	0.71	0.5	MYB61	SGR5
aspen	Potra2n17c30794	Potra2n2c4785	0.31	0.17	0.61	0.5	MYB43	NST1-NST2-NST3
aspen	Potra2n1c2250	Potra2n10c20357	0.3	0.16	0.63	0.5	MYB46-MYB83	NAC050
aspen	Potra2n1c2250	Potra2n4c9199	0.25	0.13	0.69	0.5	MYB46-MYB83	MYB43
aspen	Potra2n1c2305	Potra2n13c26303	0.24	0.12	0.71	0.5	MYB46-MYB83	MYB61
aspen	Potra2n1c2305	Potra2n5c11819	0.27	0.14	0.67	0.5	MYB46-MYB83	MYB4
aspen	Potra2n2c4723	Potra2n13c26303	0.21	0.11	0.74	0.5	MYB61	MYB61
aspen	Potra2n2c4723	Potra2n19c34420	0.24	0.17	0.65	0.5	MYB61	MYB4
aspen	Potra2n443s35699	Potra2n12c24750	0.29	0.16	0.63	0.5	MYB61	VND1-VND2-VND3-VND4-VND5-VND6
aspen	Potra2n4c9199	Potra2n12c24750	0.31	0.17	0.6	0.5	MYB43	VND1-VND2-VND3-VND4-VND5-VND6
aspen	Potra2n4c9673	Potra2n1c3797	0.3	0.17	0.62	0.5	MYB4	NST1-NST2-NST3
aspen	Potra2n4c9673	Potra2n7c16051	0.25	0.14	0.67	0.5	MYB4	MYB58
aspen	Potra2n5c11957	Potra2n17c30794	0.25	0.14	0.69	0.5	MYB58	MYB43
aspen	Potra2n5c12813	Potra2n10c20357	0.28	0.15	0.65	0.5	MYB61	NAC050
aspen	Potra2n5c12813	Potra2n12c24750	0.27	0.14	0.66	0.5	MYB61	VND1-VND2-VND3-VND4-VND5-VND6
aspen	Potra2n5c12813	Potra2n4c8837	0.28	0.16	0.63	0.5	MYB61	SND2-SND3
aspen	Potra2n7c16051	Potra2n13c26303	0.23	0.13	0.7	0.5	MYB58	MYB61
aspen	Potra2n9c19455	Potra2n15c28920	0.23	0.13	0.7	0.5	MYB46-MYB83	SGR5
aspen	Potra2n9c19455	Potra2n443s35699	0.25	0.13	0.7	0.5	MYB46-MYB83	MYB61
aspen	Potra2n9c19651	Potra2n1c3797	0.28	0.15	0.65	0.5	MYB46-MYB83	NST1-NST2-NST3
aspen	Potra2n10c22314	Potra2n10c21559	0.23	0.12	0.7	0.5	MYB61	SGR5
aspen	Potra2n10c22314	Potra2n11c23287	0.31	0.18	0.59	0.5	MYB61	SND2-SND3
aspen	Potra2n14c27236	Potra2n12c24052	0.23	0.13	0.7	0.5	MYB61	SGR5
aspen	Potra2n1c2250	Potra2n5c12338	0.3	0.14	0.66	0.5	MYB46-MYB83	NAC050
aspen	Potra2n1c2305	Potra2n3c7486	0.3	0.17	0.62	0.5	MYB46-MYB83	VND1-VND2-VND3-VND4-VND5-VND6
aspen	Potra2n1c2305	Potra2n443s35699	0.25	0.13	0.7	0.5	MYB46-MYB83	MYB61
aspen	Potra2n1c2305	Potra2n4c9199	0.26	0.14	0.67	0.5	MYB46-MYB83	MYB43
aspen	Potra2n2c4723	Potra2n12c24750	0.27	0.14	0.68	0.5	MYB61	VND1-VND2-VND3-VND4-VND5-VND6
aspen	Potra2n2c4723	Potra2n5c11957	0.23	0.11	0.73	0.5	MYB61	MYB58
aspen	Potra2n443s35699	Potra2n1c1031	0.28	0.15	0.64	0.5	MYB61	VND1-VND2-VND3-VND4-VND5-VND6
aspen	Potra2n443s35699	Potra2n5c12338	0.29	0.15	0.64	0.5	MYB61	NAC050
aspen	Potra2n4c9199	Potra2n5c12338	0.3	0.16	0.63	0.5	MYB43	NAC050
aspen	Potra2n4c9199	Potra2n5c12813	0.24	0.12	0.7	0.5	MYB43	MYB61
aspen	Potra2n4c9980	Potra2n14c27178	0.33	0.2	0.54	0.5	MYB4	NST1-NST2-NST3
aspen	Potra2n4c9980	Potra2n1c3797	0.3	0.19	0.59	0.5	MYB4	NST1-NST2-NST3
aspen	Potra2n4c9980	Potra2n7c16051	0.24	0.17	0.64	0.5	MYB4	MYB58
aspen	Potra2n5c11957	Potra2n9c18946	0.24	0.15	0.66	0.5	MYB58	MYB4
aspen	Potra2n9c18946	Potra2n15c28920	0.23	0.15	0.65	0.5	MYB4	SGR5
aspen	Potra2n9c19651	Potra2n114s34556	0.28	0.16	0.64	0.5	MYB46-MYB83	VND1-VND2-VND3-VND4-VND5-VND6
spruce	PA_chr01_G002762	PA_chr02_G002179	0.26	0.18	0.61	0.5	MYB4	SGR5
spruce	PA_chr01_G002769	PA_chr02_G002179	0.28	0.21	0.55	0.5	MYB4	SGR5
spruce	PA_chr01_G002786	PA_chr02_G002179	0.27	0.17	0.62	0.5	MYB4	SGR5
spruce	PA_chr02_G002179	PA_chr07_G004032	0.29	0.16	0.62	0.5	SGR5	VND1-VND2-VND3-VND4-VND5-VND6
arabidopsis	MYB4	NST2	0.34	0.2	0.53	0.49	NA	NA
arabidopsis	MYB4	VND6	0.31	0.17	0.58	0.49	NA	NA
arabidopsis	MYB43	VND1	0.31	0.16	0.6	0.49	NA	NA
arabidopsis	MYB43	VND5	0.31	0.15	0.62	0.49	NA	NA
arabidopsis	MYB43	VND6	0.29	0.16	0.6	0.49	NA	NA
arabidopsis	MYB46	NST2	0.34	0.18	0.54	0.49	NA	NA
arabidopsis	MYB58	MYB46	0.27	0.16	0.61	0.49	NA	NA
arabidopsis	MYB58	VND1	0.33	0.16	0.59	0.49	NA	NA
arabidopsis	MYB58	VND6	0.31	0.17	0.59	0.49	NA	NA
arabidopsis	MYB61	VND2	0.28	0.13	0.65	0.49	NA	NA
arabidopsis	MYB61	VND5	0.29	0.14	0.65	0.49	NA	NA
arabidopsis	MYB83	MYB43	0.26	0.13	0.66	0.49	NA	NA
arabidopsis	SGR5	NST3	0.28	0.16	0.62	0.49	NA	NA
aspen	Potra2n10c22314	Potra2n13c26303	0.24	0.11	0.71	0.49	MYB61	MYB61
aspen	Potra2n13c26303	Potra2n114s34556	0.26	0.13	0.67	0.49	MYB61	VND1-VND2-VND3-VND4-VND5-VND6
aspen	Potra2n13c26303	Potra2n2c4785	0.27	0.12	0.66	0.49	MYB61	NST1-NST2-NST3
aspen	Potra2n14c27236	Potra2n10c20357	0.27	0.13	0.66	0.49	MYB61	NAC050
aspen	Potra2n14c27236	Potra2n3c7486	0.27	0.13	0.67	0.49	MYB61	VND1-VND2-VND3-VND4-VND5-VND6
aspen	Potra2n15c28466	Potra2n11c23287	0.3	0.15	0.62	0.49	MYB61	SND2-SND3
aspen	Potra2n15c28466	Potra2n17c30794	0.25	0.12	0.68	0.49	MYB61	MYB43
aspen	Potra2n15c28466	Potra2n7c16511	0.28	0.12	0.67	0.49	MYB61	VND1-VND2-VND3-VND4-VND5-VND6
aspen	Potra2n17c30794	Potra2n5c12338	0.3	0.15	0.62	0.49	MYB43	NAC050
aspen	Potra2n17c30794	Potra2n8c17916	0.31	0.21	0.52	0.49	MYB43	SGR5
aspen	Potra2n1c2250	Potra2n4c9980	0.25	0.15	0.65	0.49	MYB46-MYB83	MYB4
aspen	Potra2n1c2305	Potra2n5c12338	0.3	0.14	0.64	0.49	MYB46-MYB83	NAC050
aspen	Potra2n2c4723	Potra2n1c1031	0.26	0.12	0.68	0.49	MYB61	VND1-VND2-VND3-VND4-VND5-VND6
aspen	Potra2n443s35699	Potra2n10c21559	0.23	0.12	0.7	0.49	MYB61	SGR5
aspen	Potra2n443s35699	Potra2n11c23287	0.3	0.16	0.6	0.49	MYB61	SND2-SND3
aspen	Potra2n443s35699	Potra2n7c16511	0.28	0.13	0.66	0.49	MYB61	VND1-VND2-VND3-VND4-VND5-VND6
aspen	Potra2n4c9199	Potra2n7c16511	0.3	0.13	0.65	0.49	MYB43	VND1-VND2-VND3-VND4-VND5-VND6
aspen	Potra2n4c9673	Potra2n10c20357	0.29	0.19	0.55	0.49	MYB4	NAC050
aspen	Potra2n4c9673	Potra2n15c28920	0.23	0.14	0.68	0.49	MYB4	SGR5
aspen	Potra2n5c11819	Potra2n12c24052	0.27	0.16	0.63	0.49	MYB4	SGR5
aspen	Potra2n5c11957	Potra2n12c24750	0.29	0.14	0.64	0.49	MYB58	VND1-VND2-VND3-VND4-VND5-VND6
aspen	Potra2n5c11957	Potra2n443s35699	0.22	0.11	0.71	0.49	MYB58	MYB61
aspen	Potra2n5c12813	Potra2n17c30794	0.24	0.12	0.7	0.49	MYB61	MYB43
aspen	Potra2n5c12813	Potra2n1c3797	0.27	0.13	0.67	0.49	MYB61	NST1-NST2-NST3
aspen	Potra2n7c16051	Potra2n15c28466	0.23	0.11	0.71	0.49	MYB58	MYB61
aspen	Potra2n7c16051	Potra2n9c19651	0.24	0.12	0.69	0.49	MYB58	MYB46-MYB83
aspen	Potra2n9c19455	Potra2n10c22314	0.26	0.13	0.67	0.49	MYB46-MYB83	MYB61
aspen	Potra2n9c19455	Potra2n17c30794	0.26	0.13	0.67	0.49	MYB46-MYB83	MYB43
aspen	Potra2n13c26303	Potra2n10c20357	0.28	0.15	0.63	0.49	MYB61	NAC050
aspen	Potra2n13c26303	Potra2n3c7486	0.28	0.15	0.65	0.49	MYB61	VND1-VND2-VND3-VND4-VND5-VND6
aspen	Potra2n15c28466	Potra2n12c24052	0.24	0.13	0.69	0.49	MYB61	SGR5
aspen	Potra2n17c30794	Potra2n7c16511	0.3	0.13	0.65	0.49	MYB43	VND1-VND2-VND3-VND4-VND5-VND6
aspen	Potra2n19c34420	Potra2n10c21559	0.26	0.17	0.6	0.49	MYB4	SGR5
aspen	Potra2n19c34420	Potra2n1c3797	0.32	0.19	0.54	0.49	MYB4	NST1-NST2-NST3
aspen	Potra2n19c34420	Potra2n7c16511	0.33	0.19	0.55	0.49	MYB4	VND1-VND2-VND3-VND4-VND5-VND6
aspen	Potra2n1c2305	Potra2n10c21559	0.23	0.13	0.69	0.49	MYB46-MYB83	SGR5
aspen	Potra2n1c2305	Potra2n17c30794	0.26	0.12	0.67	0.49	MYB46-MYB83	MYB43
aspen	Potra2n1c2305	Potra2n7c16051	0.23	0.11	0.71	0.49	MYB46-MYB83	MYB58
aspen	Potra2n2c4723	Potra2n4c9980	0.24	0.13	0.68	0.49	MYB61	MYB4
aspen	Potra2n443s35699	Potra2n2c4785	0.29	0.15	0.62	0.49	MYB61	NST1-NST2-NST3
aspen	Potra2n4c9673	Potra2n15c28466	0.24	0.14	0.67	0.49	MYB4	MYB61
aspen	Potra2n4c9673	Potra2n5c12338	0.31	0.15	0.61	0.49	MYB4	NAC050
aspen	Potra2n4c9673	Potra2n7c15489	0.35	0.21	0.5	0.49	MYB4	SND2-SND3
aspen	Potra2n4c9673	Potra2n9c19651	0.26	0.13	0.66	0.49	MYB4	MYB46-MYB83
aspen	Potra2n4c9980	Potra2n15c28920	0.23	0.15	0.64	0.49	MYB4	SGR5
aspen	Potra2n5c11957	Potra2n15c28466	0.23	0.11	0.71	0.49	MYB58	MYB61
aspen	Potra2n5c11957	Potra2n1c1031	0.29	0.14	0.64	0.49	MYB58	VND1-VND2-VND3-VND4-VND5-VND6
aspen	Potra2n5c11957	Potra2n9c19651	0.23	0.12	0.7	0.49	MYB58	MYB46-MYB83
aspen	Potra2n5c12813	Potra2n11c22498	0.26	0.12	0.69	0.49	MYB61	NST1-NST2-NST3
aspen	Potra2n5c12813	Potra2n2c4785	0.28	0.13	0.65	0.49	MYB61	NST1-NST2-NST3
aspen	Potra2n7c16051	Potra2n10c22314	0.23	0.11	0.71	0.49	MYB58	MYB61
aspen	Potra2n9c18946	Potra2n10c21559	0.24	0.16	0.64	0.49	MYB4	SGR5
aspen	Potra2n9c19651	Potra2n1c1031	0.29	0.14	0.63	0.49	MYB46-MYB83	VND1-VND2-VND3-VND4-VND5-VND6
aspen	Potra2n9c19651	Potra2n5c12338	0.29	0.14	0.64	0.49	MYB46-MYB83	NAC050
aspen	Potra2n13c26303	Potra2n1c1031	0.27	0.13	0.67	0.49	MYB61	VND1-VND2-VND3-VND4-VND5-VND6
aspen	Potra2n14c27236	Potra2n14c27178	0.27	0.13	0.67	0.49	MYB61	NST1-NST2-NST3
aspen	Potra2n14c27236	Potra2n1c3797	0.26	0.12	0.69	0.49	MYB61	NST1-NST2-NST3
aspen	Potra2n15c28466	Potra2n3c7486	0.3	0.15	0.61	0.49	MYB61	VND1-VND2-VND3-VND4-VND5-VND6
aspen	Potra2n15c28466	Potra2n443s35699	0.23	0.12	0.71	0.49	MYB61	MYB61
aspen	Potra2n17c30794	Potra2n11c22498	0.29	0.14	0.63	0.49	MYB43	NST1-NST2-NST3
aspen	Potra2n1c2305	Potra2n11c22498	0.28	0.14	0.64	0.49	MYB46-MYB83	NST1-NST2-NST3
aspen	Potra2n2c4723	Potra2n11c22498	0.26	0.12	0.69	0.49	MYB61	NST1-NST2-NST3
aspen	Potra2n2c4723	Potra2n2c4785	0.27	0.12	0.67	0.49	MYB61	NST1-NST2-NST3
aspen	Potra2n4c9199	Potra2n443s35699	0.25	0.13	0.67	0.49	MYB43	MYB61
aspen	Potra2n4c9199	Potra2n5c11957	0.25	0.12	0.69	0.49	MYB43	MYB58
aspen	Potra2n4c9673	Potra2n10c21559	0.24	0.14	0.66	0.49	MYB4	SGR5
aspen	Potra2n4c9673	Potra2n10c22314	0.25	0.14	0.66	0.49	MYB4	MYB61
aspen	Potra2n5c11819	Potra2n15c28466	0.26	0.12	0.68	0.49	MYB4	MYB61
aspen	Potra2n5c11957	Potra2n10c22314	0.24	0.11	0.7	0.49	MYB58	MYB61
aspen	Potra2n5c12813	Potra2n3c7486	0.27	0.13	0.66	0.49	MYB61	VND1-VND2-VND3-VND4-VND5-VND6
aspen	Potra2n7c16051	Potra2n12c24052	0.23	0.14	0.67	0.49	MYB58	SGR5
aspen	Potra2n7c16051	Potra2n9c18946	0.24	0.15	0.65	0.49	MYB58	MYB4
aspen	Potra2n9c19455	Potra2n10c20357	0.3	0.15	0.63	0.49	MYB46-MYB83	NAC050
aspen	Potra2n9c19455	Potra2n3c7486	0.3	0.15	0.61	0.49	MYB46-MYB83	VND1-VND2-VND3-VND4-VND5-VND6
aspen	Potra2n9c19651	Potra2n10c22314	0.25	0.12	0.68	0.49	MYB46-MYB83	MYB61
aspen	Potra2n10c22314	Potra2n17c30794	0.26	0.13	0.66	0.49	MYB61	MYB43
aspen	Potra2n12c24052	Potra2n11c23287	0.3	0.17	0.59	0.49	SGR5	SND2-SND3
aspen	Potra2n12c24052	Potra2n1c3797	0.29	0.17	0.6	0.49	SGR5	NST1-NST2-NST3
aspen	Potra2n14c27236	Potra2n2c4785	0.27	0.12	0.68	0.49	MYB61	NST1-NST2-NST3
aspen	Potra2n15c28466	Potra2n1c1031	0.28	0.14	0.64	0.49	MYB61	VND1-VND2-VND3-VND4-VND5-VND6
aspen	Potra2n15c28466	Potra2n5c11773	0.29	0.14	0.65	0.49	MYB61	VND1-VND2-VND3-VND4-VND5-VND6
aspen	Potra2n17c30794	Potra2n10c20357	0.3	0.17	0.58	0.49	MYB43	NAC050
aspen	Potra2n19c34420	Potra2n12c24750	0.34	0.22	0.5	0.49	MYB4	VND1-VND2-VND3-VND4-VND5-VND6
aspen	Potra2n1c2250	Potra2n4c9673	0.25	0.12	0.69	0.49	MYB46-MYB83	MYB4
aspen	Potra2n1c2305	Potra2n10c20357	0.3	0.15	0.61	0.49	MYB46-MYB83	NAC050
aspen	Potra2n1c2305	Potra2n15c28920	0.22	0.13	0.69	0.49	MYB46-MYB83	SGR5
aspen	Potra2n1c2305	Potra2n5c11957	0.24	0.12	0.69	0.49	MYB46-MYB83	MYB58
aspen	Potra2n2c4723	Potra2n3c7486	0.27	0.13	0.68	0.49	MYB61	VND1-VND2-VND3-VND4-VND5-VND6
aspen	Potra2n4c9199	Potra2n15c28466	0.25	0.13	0.68	0.49	MYB43	MYB61
aspen	Potra2n4c9199	Potra2n9c19651	0.26	0.13	0.67	0.49	MYB43	MYB46-MYB83
aspen	Potra2n4c9673	Potra2n13c26303	0.24	0.13	0.69	0.49	MYB4	MYB61
aspen	Potra2n5c11819	Potra2n10c21559	0.24	0.15	0.65	0.49	MYB4	SGR5
aspen	Potra2n5c11819	Potra2n17c30794	0.27	0.13	0.66	0.49	MYB4	MYB43
aspen	Potra2n5c11957	Potra2n19c34420	0.26	0.17	0.59	0.49	MYB58	MYB4
aspen	Potra2n7c16051	Potra2n15c28920	0.22	0.11	0.71	0.49	MYB58	SGR5
aspen	Potra2n7c16051	Potra2n3c7486	0.29	0.14	0.63	0.49	MYB58	VND1-VND2-VND3-VND4-VND5-VND6
aspen	Potra2n7c16051	Potra2n9c19455	0.24	0.12	0.7	0.49	MYB58	MYB46-MYB83
aspen	Potra2n9c18946	Potra2n4c8837	0.33	0.19	0.55	0.49	MYB4	SND2-SND3
aspen	Potra2n9c19455	Potra2n5c11773	0.3	0.13	0.65	0.49	MYB46-MYB83	VND1-VND2-VND3-VND4-VND5-VND6
aspen	Potra2n9c19455	Potra2n9c19651	0.25	0.12	0.69	0.49	MYB46-MYB83	MYB46-MYB83
aspen	Potra2n9c19651	Potra2n2c4785	0.3	0.14	0.62	0.49	MYB46-MYB83	NST1-NST2-NST3
spruce	PA_chr01_G002758	PA_chr02_G002179	0.27	0.17	0.61	0.49	MYB4	SGR5
spruce	PA_chr01_G002769	PA_chr01_G003821	0.32	0.19	0.55	0.49	MYB4	MYB4
spruce	PA_chr01_G002778	PA_chr02_G002179	0.25	0.15	0.64	0.49	MYB4	SGR5
arabidopsis	MYB4	SND3	0.34	0.17	0.54	0.48	NA	NA
arabidopsis	MYB43	VND3	0.33	0.17	0.56	0.48	NA	NA
arabidopsis	MYB43	VND4	0.28	0.14	0.62	0.48	NA	NA
arabidopsis	MYB58	NST1	0.33	0.18	0.55	0.48	NA	NA
arabidopsis	MYB58	SGR5	0.24	0.12	0.66	0.48	NA	NA
arabidopsis	MYB58	VND2	0.31	0.14	0.6	0.48	NA	NA
arabidopsis	MYB58	VND5	0.31	0.15	0.6	0.48	NA	NA
arabidopsis	MYB61	NST3	0.29	0.13	0.63	0.48	NA	NA
arabidopsis	MYB61	VND4	0.27	0.14	0.64	0.48	NA	NA
arabidopsis	MYB61	VND7	0.29	0.14	0.61	0.48	NA	NA
arabidopsis	MYB83	VND7	0.3	0.15	0.61	0.48	NA	NA
arabidopsis	SGR5	VND2	0.27	0.13	0.65	0.48	NA	NA
arabidopsis	SGR5	VND4	0.26	0.12	0.66	0.48	NA	NA
arabidopsis	SGR5	VND5	0.26	0.12	0.66	0.48	NA	NA
aspen	Potra2n10c22314	Potra2n12c24052	0.23	0.14	0.65	0.48	MYB61	SGR5
aspen	Potra2n12c24052	Potra2n17c31797	0.31	0.18	0.55	0.48	SGR5	SND2-SND3
aspen	Potra2n12c24052	Potra2n2c4785	0.3	0.17	0.57	0.48	SGR5	NST1-NST2-NST3
aspen	Potra2n15c28466	Potra2n14c27178	0.29	0.14	0.62	0.48	MYB61	NST1-NST2-NST3
aspen	Potra2n15c28466	Potra2n1c3797	0.27	0.13	0.64	0.48	MYB61	NST1-NST2-NST3
aspen	Potra2n17c30794	Potra2n1c1031	0.29	0.15	0.62	0.48	MYB43	VND1-VND2-VND3-VND4-VND5-VND6
aspen	Potra2n1c2305	Potra2n15c28466	0.24	0.11	0.7	0.48	MYB46-MYB83	MYB61
aspen	Potra2n1c2305	Potra2n5c11773	0.3	0.12	0.64	0.48	MYB46-MYB83	VND1-VND2-VND3-VND4-VND5-VND6
aspen	Potra2n443s35699	Potra2n1c3797	0.27	0.13	0.64	0.48	MYB61	NST1-NST2-NST3
aspen	Potra2n4c9199	Potra2n10c22314	0.26	0.14	0.65	0.48	MYB43	MYB61
aspen	Potra2n4c9980	Potra2n12c24052	0.26	0.16	0.6	0.48	MYB4	SGR5
aspen	Potra2n5c11957	Potra2n3c7486	0.3	0.14	0.62	0.48	MYB58	VND1-VND2-VND3-VND4-VND5-VND6
aspen	Potra2n5c11957	Potra2n9c19455	0.23	0.1	0.7	0.48	MYB58	MYB46-MYB83
aspen	Potra2n7c16051	Potra2n1c1031	0.29	0.14	0.62	0.48	MYB58	VND1-VND2-VND3-VND4-VND5-VND6
aspen	Potra2n7c16051	Potra2n7c15489	0.31	0.16	0.58	0.48	MYB58	SND2-SND3
aspen	Potra2n9c18946	Potra2n15c28466	0.23	0.13	0.65	0.48	MYB4	MYB61
aspen	Potra2n9c18946	Potra2n7c15489	0.36	0.21	0.49	0.48	MYB4	SND2-SND3
aspen	Potra2n9c19455	Potra2n10c21559	0.23	0.11	0.68	0.48	MYB46-MYB83	SGR5
aspen	Potra2n9c19455	Potra2n14c27178	0.3	0.15	0.61	0.48	MYB46-MYB83	NST1-NST2-NST3
aspen	Potra2n9c19455	Potra2n7c16511	0.29	0.13	0.64	0.48	MYB46-MYB83	VND1-VND2-VND3-VND4-VND5-VND6
aspen	Potra2n9c19651	Potra2n3c7486	0.3	0.14	0.63	0.48	MYB46-MYB83	VND1-VND2-VND3-VND4-VND5-VND6
aspen	Potra2n9c19651	Potra2n4c8837	0.3	0.15	0.6	0.48	MYB46-MYB83	SND2-SND3
aspen	Potra2n10c22314	Potra2n12c24750	0.29	0.13	0.63	0.48	MYB61	VND1-VND2-VND3-VND4-VND5-VND6
aspen	Potra2n10c22314	Potra2n443s35699	0.24	0.1	0.7	0.48	MYB61	MYB61
aspen	Potra2n19c34420	Potra2n14c27178	0.35	0.22	0.47	0.48	MYB4	NST1-NST2-NST3
aspen	Potra2n1c2305	Potra2n1c3797	0.29	0.13	0.64	0.48	MYB46-MYB83	NST1-NST2-NST3
aspen	Potra2n2c4723	Potra2n14c27178	0.28	0.12	0.67	0.48	MYB61	NST1-NST2-NST3
aspen	Potra2n443s35699	Potra2n12c24052	0.23	0.12	0.68	0.48	MYB61	SGR5
aspen	Potra2n4c9673	Potra2n5c11773	0.31	0.13	0.62	0.48	MYB4	VND1-VND2-VND3-VND4-VND5-VND6
aspen	Potra2n5c11819	Potra2n9c19455	0.26	0.12	0.67	0.48	MYB4	MYB46-MYB83
aspen	Potra2n7c16051	Potra2n17c30794	0.24	0.11	0.69	0.48	MYB58	MYB43
aspen	Potra2n8c17916	Potra2n5c12338	0.37	0.18	0.53	0.48	SGR5	NAC050
aspen	Potra2n9c19455	Potra2n2c4785	0.3	0.13	0.62	0.48	MYB46-MYB83	NST1-NST2-NST3
aspen	Potra2n9c19651	Potra2n5c11773	0.29	0.13	0.63	0.48	MYB46-MYB83	VND1-VND2-VND3-VND4-VND5-VND6
aspen	Potra2n10c22314	Potra2n15c28466	0.24	0.11	0.7	0.48	MYB61	MYB61
aspen	Potra2n10c22314	Potra2n1c1031	0.29	0.14	0.63	0.48	MYB61	VND1-VND2-VND3-VND4-VND5-VND6
aspen	Potra2n10c22314	Potra2n5c11773	0.3	0.14	0.63	0.48	MYB61	VND1-VND2-VND3-VND4-VND5-VND6
aspen	Potra2n10c22314	Potra2n5c12338	0.3	0.13	0.63	0.48	MYB61	NAC050
aspen	Potra2n15c28466	Potra2n12c24750	0.28	0.13	0.63	0.48	MYB61	VND1-VND2-VND3-VND4-VND5-VND6
aspen	Potra2n17c30794	Potra2n12c24052	0.25	0.15	0.63	0.48	MYB43	SGR5
aspen	Potra2n19c34420	Potra2n2c4785	0.34	0.21	0.48	0.48	MYB4	NST1-NST2-NST3
aspen	Potra2n1c2250	Potra2n4c8837	0.3	0.14	0.63	0.48	MYB46-MYB83	SND2-SND3
aspen	Potra2n1c2305	Potra2n12c24052	0.23	0.11	0.68	0.48	MYB46-MYB83	SGR5
aspen	Potra2n4c9199	Potra2n10c20357	0.3	0.15	0.59	0.48	MYB43	NAC050
aspen	Potra2n4c9199	Potra2n9c19455	0.26	0.12	0.67	0.48	MYB43	MYB46-MYB83
aspen	Potra2n4c9673	Potra2n14c27178	0.32	0.16	0.59	0.48	MYB4	NST1-NST2-NST3
aspen	Potra2n4c9980	Potra2n15c28466	0.25	0.14	0.63	0.48	MYB4	MYB61
aspen	Potra2n5c11819	Potra2n9c19651	0.28	0.13	0.64	0.48	MYB4	MYB46-MYB83
aspen	Potra2n9c19651	Potra2n17c30794	0.26	0.12	0.67	0.48	MYB46-MYB83	MYB43
aspen	Potra2n9c19651	Potra2n7c16511	0.28	0.11	0.66	0.48	MYB46-MYB83	VND1-VND2-VND3-VND4-VND5-VND6
aspen	Potra2n10c22314	Potra2n14c27178	0.31	0.14	0.61	0.48	MYB61	NST1-NST2-NST3
aspen	Potra2n10c22314	Potra2n1c3797	0.29	0.13	0.63	0.48	MYB61	NST1-NST2-NST3
aspen	Potra2n13c26303	Potra2n14c27178	0.28	0.12	0.66	0.48	MYB61	NST1-NST2-NST3
aspen	Potra2n13c26303	Potra2n1c3797	0.26	0.12	0.67	0.48	MYB61	NST1-NST2-NST3
aspen	Potra2n15c28466	Potra2n5c12338	0.29	0.12	0.65	0.48	MYB61	NAC050
aspen	Potra2n17c30794	Potra2n443s35699	0.24	0.11	0.68	0.48	MYB43	MYB61
aspen	Potra2n19c34420	Potra2n15c28920	0.24	0.16	0.61	0.48	MYB4	SGR5
aspen	Potra2n1c2250	Potra2n7c15489	0.31	0.15	0.6	0.48	MYB46-MYB83	SND2-SND3
aspen	Potra2n2c4723	Potra2n10c20357	0.28	0.13	0.64	0.48	MYB61	NAC050
aspen	Potra2n4c9673	Potra2n2c4785	0.32	0.16	0.58	0.48	MYB4	NST1-NST2-NST3
aspen	Potra2n4c9673	Potra2n5c11819	0.26	0.14	0.63	0.48	MYB4	MYB4
aspen	Potra2n4c9980	Potra2n10c21559	0.24	0.15	0.64	0.48	MYB4	SGR5
aspen	Potra2n5c11819	Potra2n10c22314	0.26	0.13	0.64	0.48	MYB4	MYB61
aspen	Potra2n5c12813	Potra2n1c1031	0.27	0.12	0.67	0.48	MYB61	VND1-VND2-VND3-VND4-VND5-VND6
aspen	Potra2n7c16051	Potra2n10c20357	0.3	0.15	0.62	0.48	MYB58	NAC050
aspen	Potra2n7c16051	Potra2n443s35699	0.23	0.1	0.7	0.48	MYB58	MYB61
aspen	Potra2n9c19455	Potra2n15c28466	0.24	0.11	0.7	0.48	MYB46-MYB83	MYB61
aspen	Potra2n9c19455	Potra2n5c12338	0.3	0.12	0.64	0.48	MYB46-MYB83	NAC050
spruce	PA_chr01_G002758	PA_chr09_G004772	0.29	0.28	0.39	0.48	MYB4	MYB46-MYB83
spruce	PA_chr01_G002786	PA_chr09_G004772	0.25	0.13	0.66	0.48	MYB4	MYB46-MYB83
spruce	PA_chr01_G003821	PA_chr02_G002179	0.25	0.14	0.63	0.48	MYB4	SGR5
spruce	PA_chr09_G004772	PA_chr02_G002179	0.22	0.13	0.66	0.48	MYB46-MYB83	SGR5
arabidopsis	MYB46	MYB43	0.28	0.13	0.63	0.47	NA	NA
arabidopsis	MYB46	NAC050	0.31	0.19	0.51	0.47	NA	NA
arabidopsis	MYB58	MYB4	0.27	0.16	0.58	0.47	NA	NA
arabidopsis	MYB58	MYB43	0.27	0.13	0.62	0.47	NA	NA
arabidopsis	MYB58	NAC050	0.28	0.17	0.56	0.47	NA	NA
arabidopsis	MYB58	NST3	0.32	0.15	0.56	0.47	NA	NA
arabidopsis	MYB58	VND4	0.3	0.13	0.61	0.47	NA	NA
arabidopsis	MYB61	MYB58	0.25	0.11	0.66	0.47	NA	NA
arabidopsis	MYB61	NAC050	0.28	0.12	0.63	0.47	NA	NA
arabidopsis	MYB61	NST2	0.31	0.15	0.59	0.47	NA	NA
arabidopsis	MYB61	VND6	0.28	0.12	0.64	0.47	NA	NA
arabidopsis	MYB83	MYB4	0.25	0.11	0.65	0.47	NA	NA
arabidopsis	MYB83	NST1	0.3	0.13	0.62	0.47	NA	NA
arabidopsis	MYB83	NST2	0.3	0.13	0.61	0.47	NA	NA
arabidopsis	MYB83	NST3	0.29	0.12	0.63	0.47	NA	NA
arabidopsis	MYB83	SND3	0.32	0.13	0.59	0.47	NA	NA
arabidopsis	SGR5	VND3	0.28	0.14	0.61	0.47	NA	NA
aspen	Potra2n10c22314	Potra2n11c22498	0.28	0.11	0.65	0.47	MYB61	NST1-NST2-NST3
aspen	Potra2n19c34420	Potra2n5c11773	0.34	0.18	0.53	0.47	MYB4	VND1-VND2-VND3-VND4-VND5-VND6
aspen	Potra2n1c2305	Potra2n4c9673	0.26	0.11	0.65	0.47	MYB46-MYB83	MYB4
aspen	Potra2n2c4723	Potra2n8c17916	0.25	0.11	0.65	0.47	MYB61	SGR5
aspen	Potra2n4c9673	Potra2n443s35699	0.24	0.11	0.67	0.47	MYB4	MYB61
aspen	Potra2n4c9673	Potra2n9c19455	0.25	0.11	0.66	0.47	MYB4	MYB46-MYB83
aspen	Potra2n5c11819	Potra2n9c18946	0.25	0.15	0.6	0.47	MYB4	MYB4
aspen	Potra2n5c11957	Potra2n10c20357	0.3	0.14	0.61	0.47	MYB58	NAC050
aspen	Potra2n5c11957	Potra2n4c8837	0.3	0.12	0.61	0.47	MYB58	SND2-SND3
aspen	Potra2n5c12813	Potra2n11c23287	0.28	0.13	0.63	0.47	MYB61	SND2-SND3
aspen	Potra2n5c12813	Potra2n14c27178	0.28	0.12	0.65	0.47	MYB61	NST1-NST2-NST3
aspen	Potra2n9c19455	Potra2n1c3797	0.28	0.11	0.66	0.47	MYB46-MYB83	NST1-NST2-NST3
aspen	Potra2n9c19651	Potra2n10c20357	0.3	0.13	0.61	0.47	MYB46-MYB83	NAC050
aspen	Potra2n10c22314	Potra2n3c7486	0.29	0.12	0.63	0.47	MYB61	VND1-VND2-VND3-VND4-VND5-VND6
aspen	Potra2n12c24052	Potra2n12c24750	0.28	0.14	0.6	0.47	SGR5	VND1-VND2-VND3-VND4-VND5-VND6
aspen	Potra2n15c28466	Potra2n2c4785	0.29	0.11	0.65	0.47	MYB61	NST1-NST2-NST3
aspen	Potra2n1c2250	Potra2n19c34420	0.27	0.14	0.61	0.47	MYB46-MYB83	MYB4
aspen	Potra2n443s35699	Potra2n11c22498	0.27	0.12	0.65	0.47	MYB61	NST1-NST2-NST3
aspen	Potra2n4c9199	Potra2n5c11819	0.26	0.13	0.64	0.47	MYB43	MYB4
aspen	Potra2n4c9980	Potra2n443s35699	0.25	0.13	0.63	0.47	MYB4	MYB61
aspen	Potra2n4c9980	Potra2n4c8837	0.34	0.17	0.53	0.47	MYB4	SND2-SND3
aspen	Potra2n4c9980	Potra2n9c19455	0.25	0.14	0.62	0.47	MYB4	MYB46-MYB83
aspen	Potra2n5c11819	Potra2n10c20357	0.3	0.16	0.58	0.47	MYB4	NAC050
aspen	Potra2n7c16051	Potra2n11c23287	0.31	0.14	0.61	0.47	MYB58	SND2-SND3
aspen	Potra2n9c19455	Potra2n12c24052	0.23	0.12	0.66	0.47	MYB46-MYB83	SGR5
aspen	Potra2n10c22314	Potra2n8c17916	0.27	0.16	0.57	0.47	MYB61	SGR5
aspen	Potra2n12c24052	Potra2n1c1031	0.29	0.14	0.59	0.47	SGR5	VND1-VND2-VND3-VND4-VND5-VND6
aspen	Potra2n12c24052	Potra2n5c12338	0.29	0.14	0.61	0.47	SGR5	NAC050
aspen	Potra2n15c28466	Potra2n10c20357	0.29	0.13	0.62	0.47	MYB61	NAC050
aspen	Potra2n15c28466	Potra2n4c8837	0.29	0.13	0.61	0.47	MYB61	SND2-SND3
aspen	Potra2n1c2305	Potra2n2c4785	0.3	0.13	0.62	0.47	MYB46-MYB83	NST1-NST2-NST3
aspen	Potra2n2c4723	Potra2n17c31797	0.29	0.11	0.64	0.47	MYB61	SND2-SND3
aspen	Potra2n443s35699	Potra2n10c20357	0.28	0.12	0.64	0.47	MYB61	NAC050
aspen	Potra2n443s35699	Potra2n3c7486	0.29	0.12	0.63	0.47	MYB61	VND1-VND2-VND3-VND4-VND5-VND6
aspen	Potra2n443s35699	Potra2n4c8837	0.29	0.13	0.61	0.47	MYB61	SND2-SND3
aspen	Potra2n4c9673	Potra2n17c30794	0.25	0.12	0.64	0.47	MYB4	MYB43
aspen	Potra2n7c16051	Potra2n17c31797	0.31	0.15	0.58	0.47	MYB58	SND2-SND3
aspen	Potra2n7c16051	Potra2n19c34420	0.26	0.16	0.59	0.47	MYB58	MYB4
aspen	Potra2n8c17916	Potra2n8c16892	0.3	0.13	0.61	0.47	SGR5	NAC050
aspen	Potra2n9c18946	Potra2n12c24052	0.25	0.14	0.62	0.47	MYB4	SGR5
aspen	Potra2n9c19651	Potra2n14c27178	0.31	0.12	0.62	0.47	MYB46-MYB83	NST1-NST2-NST3
aspen	Potra2n10c22314	Potra2n7c16511	0.29	0.11	0.65	0.47	MYB61	VND1-VND2-VND3-VND4-VND5-VND6
aspen	Potra2n12c24052	Potra2n7c16511	0.27	0.13	0.63	0.47	SGR5	VND1-VND2-VND3-VND4-VND5-VND6
aspen	Potra2n17c30794	Potra2n12c24750	0.3	0.14	0.6	0.47	MYB43	VND1-VND2-VND3-VND4-VND5-VND6
aspen	Potra2n1c2250	Potra2n8c17916	0.26	0.14	0.62	0.47	MYB46-MYB83	SGR5
aspen	Potra2n4c9199	Potra2n1c1031	0.3	0.12	0.61	0.47	MYB43	VND1-VND2-VND3-VND4-VND5-VND6
aspen	Potra2n4c9199	Potra2n4c9673	0.25	0.12	0.64	0.47	MYB43	MYB4
aspen	Potra2n4c9199	Potra2n8c17916	0.31	0.19	0.52	0.47	MYB43	SGR5
aspen	Potra2n7c16051	Potra2n4c8837	0.3	0.13	0.62	0.47	MYB58	SND2-SND3
aspen	Potra2n9c18946	Potra2n443s35699	0.24	0.12	0.65	0.47	MYB4	MYB61
aspen	Potra2n9c19651	Potra2n12c24052	0.23	0.12	0.66	0.47	MYB46-MYB83	SGR5
spruce	PA_chr01_G002782	PA_chr01_G003821	0.3	0.17	0.55	0.47	MYB4	MYB4
spruce	PA_chr09_G004772	PA_chr07_G004032	0.28	0.14	0.6	0.47	MYB46-MYB83	VND1-VND2-VND3-VND4-VND5-VND6
spruce	PA_chr12_G002836	PA_chr02_G002179	0.28	0.16	0.57	0.47	MYB4	SGR5
spruce	PA_chr12_G002839	PA_chr02_G002179	0.26	0.15	0.6	0.47	MYB4	SGR5
spruce	PA_chr12_G002840	PA_chr02_G002179	0.26	0.14	0.62	0.47	MYB4	SGR5
arabidopsis	MYB4	MYB43	0.26	0.13	0.61	0.46	NA	NA
arabidopsis	MYB43	VND7	0.31	0.13	0.58	0.46	NA	NA
arabidopsis	MYB46	SND3	0.35	0.15	0.55	0.46	NA	NA
arabidopsis	MYB58	VND3	0.33	0.16	0.54	0.46	NA	NA
arabidopsis	MYB58	VND7	0.33	0.14	0.57	0.46	NA	NA
arabidopsis	MYB61	MYB4	0.25	0.12	0.63	0.46	NA	NA
arabidopsis	MYB61	VND3	0.3	0.13	0.59	0.46	NA	NA
arabidopsis	MYB83	NAC050	0.27	0.12	0.62	0.46	NA	NA
arabidopsis	MYB83	SND2	0.32	0.13	0.59	0.46	NA	NA
arabidopsis	MYB83	VND3	0.3	0.13	0.6	0.46	NA	NA
aspen	Potra2n10c22314	Potra2n2c4785	0.3	0.12	0.62	0.46	MYB61	NST1-NST2-NST3
aspen	Potra2n2c4723	Potra2n7c15489	0.29	0.11	0.61	0.46	MYB61	SND2-SND3
aspen	Potra2n443s35699	Potra2n14c27178	0.29	0.11	0.63	0.46	MYB61	NST1-NST2-NST3
aspen	Potra2n4c9199	Potra2n11c23287	0.32	0.13	0.58	0.46	MYB43	SND2-SND3
aspen	Potra2n4c9199	Potra2n14c27178	0.3	0.12	0.6	0.46	MYB43	NST1-NST2-NST3
aspen	Potra2n4c9980	Potra2n5c11819	0.25	0.15	0.59	0.46	MYB4	MYB4
aspen	Potra2n5c11819	Potra2n19c34420	0.28	0.16	0.54	0.46	MYB4	MYB4
aspen	Potra2n9c18946	Potra2n9c19651	0.26	0.11	0.64	0.46	MYB4	MYB46-MYB83
aspen	Potra2n9c19455	Potra2n11c23287	0.31	0.12	0.59	0.46	MYB46-MYB83	SND2-SND3
aspen	Potra2n14c27236	Potra2n8c17916	0.25	0.1	0.66	0.46	MYB61	SGR5
aspen	Potra2n1c2305	Potra2n11c23287	0.32	0.12	0.59	0.46	MYB46-MYB83	SND2-SND3
aspen	Potra2n1c2305	Potra2n14c27178	0.3	0.11	0.62	0.46	MYB46-MYB83	NST1-NST2-NST3
aspen	Potra2n4c9199	Potra2n12c24052	0.24	0.11	0.65	0.46	MYB43	SGR5
aspen	Potra2n5c12813	Potra2n17c31797	0.29	0.11	0.62	0.46	MYB61	SND2-SND3
aspen	Potra2n9c18946	Potra2n10c22314	0.24	0.11	0.64	0.46	MYB4	MYB61
aspen	Potra2n10c21559	Potra2n13c25337	0.24	0.1	0.66	0.46	SGR5	VND7
aspen	Potra2n13c26303	Potra2n7c15489	0.29	0.12	0.6	0.46	MYB61	SND2-SND3
aspen	Potra2n4c9199	Potra2n4c8837	0.31	0.14	0.58	0.46	MYB43	SND2-SND3
aspen	Potra2n5c11957	Potra2n11c23287	0.31	0.12	0.61	0.46	MYB58	SND2-SND3
aspen	Potra2n9c19455	Potra2n4c8837	0.31	0.13	0.59	0.46	MYB46-MYB83	SND2-SND3
aspen	Potra2n9c19651	Potra2n11c23287	0.31	0.13	0.59	0.46	MYB46-MYB83	SND2-SND3
aspen	Potra2n4c9199	Potra2n7c15489	0.33	0.15	0.55	0.46	MYB43	SND2-SND3
aspen	Potra2n4c9673	Potra2n17c31797	0.34	0.17	0.51	0.46	MYB4	SND2-SND3
aspen	Potra2n4c9673	Potra2n9c18946	0.24	0.14	0.6	0.46	MYB4	MYB4
aspen	Potra2n9c18946	Potra2n9c19455	0.26	0.11	0.63	0.46	MYB4	MYB46-MYB83
spruce	PA_chr01_G002758	PA_chr07_G004032	0.32	0.15	0.55	0.46	MYB4	VND1-VND2-VND3-VND4-VND5-VND6
spruce	PA_chr01_G002762	PA_chr07_G004032	0.31	0.15	0.55	0.46	MYB4	VND1-VND2-VND3-VND4-VND5-VND6
spruce	PA_chr01_G002766	PA_chr12_G002836	0.3	0.18	0.51	0.46	MYB4	MYB4
arabidopsis	MYB4	MYB46	0.27	0.11	0.61	0.45	NA	NA
arabidopsis	MYB4	NAC050	0.3	0.12	0.59	0.45	NA	NA
arabidopsis	MYB43	NAC050	0.29	0.15	0.55	0.45	NA	NA
arabidopsis	MYB43	SND3	0.32	0.13	0.56	0.45	NA	NA
arabidopsis	MYB46	NST3	0.31	0.12	0.59	0.45	NA	NA
arabidopsis	MYB58	SND2	0.34	0.16	0.51	0.45	NA	NA
arabidopsis	MYB61	SND3	0.31	0.11	0.6	0.45	NA	NA
aspen	Potra2n13c26303	Potra2n17c31797	0.29	0.12	0.59	0.45	MYB61	SND2-SND3
aspen	Potra2n4c9980	Potra2n17c31797	0.36	0.17	0.48	0.45	MYB4	SND2-SND3
aspen	Potra2n14c27236	Potra2n7c15489	0.29	0.11	0.61	0.45	MYB61	SND2-SND3
aspen	Potra2n17c30794	Potra2n11c23287	0.33	0.12	0.59	0.45	MYB43	SND2-SND3
aspen	Potra2n17c30794	Potra2n14c27178	0.31	0.12	0.59	0.45	MYB43	NST1-NST2-NST3
aspen	Potra2n1c2305	Potra2n4c9980	0.25	0.11	0.62	0.45	MYB46-MYB83	MYB4
aspen	Potra2n5c11957	Potra2n7c15489	0.31	0.12	0.57	0.45	MYB58	SND2-SND3
aspen	Potra2n9c18946	Potra2n17c30794	0.26	0.11	0.62	0.45	MYB4	MYB43
aspen	Potra2n9c19455	Potra2n17c31797	0.33	0.14	0.54	0.45	MYB46-MYB83	SND2-SND3
aspen	Potra2n9c19651	Potra2n7c15489	0.32	0.14	0.56	0.45	MYB46-MYB83	SND2-SND3
aspen	Potra2n13c26303	Potra2n8c17916	0.26	0.11	0.63	0.45	MYB61	SGR5
aspen	Potra2n19c34420	Potra2n12c24052	0.27	0.17	0.53	0.45	MYB4	SGR5
aspen	Potra2n1c2305	Potra2n17c31797	0.33	0.14	0.55	0.45	MYB46-MYB83	SND2-SND3
aspen	Potra2n1c2305	Potra2n9c18946	0.25	0.11	0.64	0.45	MYB46-MYB83	MYB4
aspen	Potra2n4c9673	Potra2n4c9980	0.24	0.14	0.58	0.45	MYB4	MYB4
aspen	Potra2n4c9980	Potra2n7c15489	0.36	0.19	0.46	0.45	MYB4	SND2-SND3
aspen	Potra2n4c9980	Potra2n9c19651	0.26	0.11	0.62	0.45	MYB4	MYB46-MYB83
aspen	Potra2n8c17916	Potra2n11c23287	0.37	0.17	0.48	0.45	SGR5	SND2-SND3
aspen	Potra2n9c18946	Potra2n17c31797	0.35	0.16	0.51	0.45	MYB4	SND2-SND3
aspen	Potra2n14c27236	Potra2n17c31797	0.29	0.11	0.61	0.45	MYB61	SND2-SND3
aspen	Potra2n1c2305	Potra2n4c8837	0.3	0.12	0.6	0.45	MYB46-MYB83	SND2-SND3
aspen	Potra2n4c9673	Potra2n19c34420	0.26	0.17	0.52	0.45	MYB4	MYB4
aspen	Potra2n4c9980	Potra2n10c22314	0.25	0.11	0.62	0.45	MYB4	MYB61
aspen	Potra2n5c11957	Potra2n17c31797	0.31	0.13	0.57	0.45	MYB58	SND2-SND3
aspen	Potra2n5c12813	Potra2n7c15489	0.29	0.12	0.6	0.45	MYB61	SND2-SND3
aspen	Potra2n5c12813	Potra2n8c17916	0.26	0.1	0.64	0.45	MYB61	SGR5
aspen	Potra2n8c17916	Potra2n11c22498	0.33	0.14	0.54	0.45	SGR5	NST1-NST2-NST3
aspen	Potra2n9c18946	Potra2n10c20357	0.31	0.14	0.55	0.45	MYB4	NAC050
aspen	Potra2n9c19651	Potra2n17c31797	0.32	0.12	0.58	0.45	MYB46-MYB83	SND2-SND3
aspen	Potra2n9c19651	Potra2n19c34420	0.28	0.13	0.57	0.45	MYB46-MYB83	MYB4
spruce	PA_chr01_G002759	PA_chr07_G004032	0.31	0.15	0.55	0.45	MYB4	VND1-VND2-VND3-VND4-VND5-VND6
spruce	PA_chr01_G002769	PA_chr01_G002782	0.29	0.15	0.55	0.45	MYB4	MYB4
spruce	PA_chr01_G002778	PA_chr01_G002782	0.26	0.12	0.6	0.45	MYB4	MYB4
spruce	PA_chr01_G002778	PA_chr04_G002634	0.28	0.14	0.57	0.45	MYB4	MYB4
spruce	PA_chr01_G002778	PA_chr12_G002840	0.27	0.11	0.61	0.45	MYB4	MYB4
spruce	PA_chr01_G002784	PA_chr09_G004772	0.23	0.17	0.53	0.45	MYB4	MYB46-MYB83
arabidopsis	MYB46	SND2	0.34	0.13	0.54	0.44	NA	NA
arabidopsis	MYB61	SND2	0.31	0.11	0.59	0.44	NA	NA
aspen	Potra2n17c30794	Potra2n7c15489	0.33	0.14	0.53	0.44	MYB43	SND2-SND3
aspen	Potra2n19c34420	Potra2n5c12338	0.34	0.14	0.52	0.44	MYB4	NAC050
aspen	Potra2n1c2305	Potra2n7c15489	0.32	0.13	0.55	0.44	MYB46-MYB83	SND2-SND3
aspen	Potra2n4c9199	Potra2n4c9980	0.26	0.11	0.6	0.44	MYB43	MYB4
aspen	Potra2n7c16051	Potra2n8c17916	0.26	0.12	0.58	0.44	MYB58	SGR5
aspen	Potra2n15c28466	Potra2n19c34420	0.26	0.12	0.59	0.44	MYB61	MYB4
aspen	Potra2n443s35699	Potra2n17c31797	0.31	0.1	0.59	0.44	MYB61	SND2-SND3
aspen	Potra2n4c9199	Potra2n17c31797	0.33	0.14	0.54	0.44	MYB43	SND2-SND3
aspen	Potra2n4c9199	Potra2n9c18946	0.25	0.11	0.62	0.44	MYB43	MYB4
aspen	Potra2n17c30794	Potra2n17c31797	0.32	0.12	0.56	0.44	MYB43	SND2-SND3
aspen	Potra2n1c2305	Potra2n19c34420	0.28	0.12	0.57	0.44	MYB46-MYB83	MYB4
aspen	Potra2n17c30794	Potra2n4c8837	0.31	0.11	0.58	0.44	MYB43	SND2-SND3
aspen	Potra2n4c9980	Potra2n17c30794	0.26	0.11	0.6	0.44	MYB4	MYB43
aspen	Potra2n9c19455	Potra2n7c15489	0.33	0.13	0.54	0.44	MYB46-MYB83	SND2-SND3
spruce	PA_chr01_G002759	PA_chr09_G004772	0.24	0.21	0.46	0.44	MYB4	MYB46-MYB83
spruce	PA_chr01_G002766	PA_chr01_G002769	0.3	0.14	0.54	0.44	MYB4	MYB4
spruce	PA_chr01_G002766	PA_chr04_G002634	0.29	0.15	0.52	0.44	MYB4	MYB4
spruce	PA_chr01_G002778	PA_chr01_G002786	0.28	0.12	0.58	0.44	MYB4	MYB4
spruce	PA_chr01_G002778	PA_chr01_G003821	0.27	0.11	0.6	0.44	MYB4	MYB4
spruce	PA_chr01_G002778	PA_chr12_G002836	0.28	0.12	0.56	0.44	MYB4	MYB4
spruce	PA_chr01_G002782	PA_chr12_G002840	0.28	0.12	0.58	0.44	MYB4	MYB4
spruce	PA_chr01_G002786	PA_chr04_G002634	0.3	0.15	0.52	0.44	MYB4	MYB4
arabidopsis	MYB43	SND2	0.33	0.13	0.52	0.43	NA	NA
aspen	Potra2n10c22314	Potra2n19c34420	0.28	0.12	0.56	0.43	MYB61	MYB4
aspen	Potra2n4c9980	Potra2n9c18946	0.23	0.14	0.55	0.43	MYB4	MYB4
aspen	Potra2n15c28466	Potra2n17c31797	0.3	0.09	0.59	0.43	MYB61	SND2-SND3
aspen	Potra2n4c9199	Potra2n19c34420	0.29	0.12	0.55	0.43	MYB43	MYB4
aspen	Potra2n5c11957	Potra2n8c17916	0.26	0.1	0.6	0.43	MYB58	SGR5
aspen	Potra2n9c19455	Potra2n19c34420	0.28	0.12	0.57	0.43	MYB46-MYB83	MYB4
aspen	Potra2n17c30794	Potra2n19c34420	0.29	0.13	0.54	0.43	MYB43	MYB4
aspen	Potra2n8c17916	Potra2n7c16511	0.32	0.12	0.55	0.43	SGR5	VND1-VND2-VND3-VND4-VND5-VND6
aspen	Potra2n15c28466	Potra2n7c15489	0.31	0.11	0.56	0.43	MYB61	SND2-SND3
aspen	Potra2n15c28466	Potra2n8c17916	0.27	0.1	0.6	0.43	MYB61	SGR5
aspen	Potra2n19c34420	Potra2n443s35699	0.26	0.1	0.58	0.43	MYB4	MYB61
aspen	Potra2n443s35699	Potra2n8c17916	0.27	0.1	0.59	0.43	MYB61	SGR5
spruce	PA_chr01_G002766	PA_chr01_G003821	0.26	0.13	0.56	0.43	MYB4	MYB4
spruce	PA_chr01_G002769	PA_chr12_G002840	0.29	0.11	0.57	0.43	MYB4	MYB4
spruce	PA_chr01_G002778	PA_chr12_G002839	0.29	0.11	0.56	0.43	MYB4	MYB4
spruce	PA_chr01_G002782	PA_chr09_G004772	0.24	0.12	0.58	0.43	MYB4	MYB46-MYB83
spruce	PA_chr01_G002784	PA_chr12_G002840	0.28	0.1	0.58	0.43	MYB4	MYB4
spruce	PA_chr01_G002786	PA_chr12_G002840	0.29	0.11	0.57	0.43	MYB4	MYB4
spruce	PA_chr01_G003821	PA_chr12_G002840	0.27	0.11	0.59	0.43	MYB4	MYB4
spruce	PA_chr04_G002634	PA_chr09_G004772	0.24	0.13	0.55	0.43	MYB4	MYB46-MYB83
spruce	PA_chr04_G002634	PA_chr12_G002840	0.27	0.13	0.55	0.43	MYB4	MYB4
spruce	PA_chr09_G004772	PA_chr12_G002840	0.24	0.13	0.56	0.43	MYB46-MYB83	MYB4
spruce	PA_chr12_G002836	PA_chr12_G002840	0.27	0.13	0.55	0.43	MYB4	MYB4
aspen	Potra2n10c22314	Potra2n17c31797	0.31	0.1	0.56	0.42	MYB61	SND2-SND3
aspen	Potra2n1c2305	Potra2n8c17916	0.29	0.11	0.56	0.42	MYB46-MYB83	SGR5
aspen	Potra2n8c17916	Potra2n10c20357	0.33	0.13	0.5	0.42	SGR5	NAC050
aspen	Potra2n8c17916	Potra2n15c28920	0.22	0.08	0.61	0.42	SGR5	SGR5
aspen	Potra2n8c17916	Potra2n3c7486	0.34	0.1	0.54	0.42	SGR5	VND1-VND2-VND3-VND4-VND5-VND6
aspen	Potra2n9c19651	Potra2n8c17916	0.28	0.09	0.59	0.42	MYB46-MYB83	SGR5
aspen	Potra2n10c22314	Potra2n7c15489	0.31	0.1	0.56	0.42	MYB61	SND2-SND3
aspen	Potra2n5c11819	Potra2n8c17916	0.31	0.11	0.53	0.42	MYB4	SGR5
aspen	Potra2n8c17916	Potra2n1c3797	0.32	0.12	0.53	0.42	SGR5	NST1-NST2-NST3
aspen	Potra2n19c34420	Potra2n10c20357	0.33	0.13	0.5	0.42	MYB4	NAC050
aspen	Potra2n19c34420	Potra2n4c8837	0.35	0.15	0.46	0.42	MYB4	SND2-SND3
aspen	Potra2n443s35699	Potra2n7c15489	0.31	0.1	0.56	0.42	MYB61	SND2-SND3
spruce	PA_chr01_G002758	PA_chr12_G002840	0.27	0.11	0.56	0.42	MYB4	MYB4
spruce	PA_chr01_G002762	PA_chr01_G002778	0.26	0.09	0.58	0.42	MYB4	MYB4
spruce	PA_chr01_G002762	PA_chr04_G002634	0.27	0.13	0.51	0.42	MYB4	MYB4
spruce	PA_chr01_G002762	PA_chr12_G002840	0.27	0.1	0.57	0.42	MYB4	MYB4
spruce	PA_chr01_G002766	PA_chr01_G002786	0.29	0.12	0.53	0.42	MYB4	MYB4
spruce	PA_chr01_G002766	PA_chr12_G002840	0.28	0.11	0.57	0.42	MYB4	MYB4
spruce	PA_chr01_G002769	PA_chr01_G002786	0.3	0.12	0.53	0.42	MYB4	MYB4
spruce	PA_chr01_G002769	PA_chr04_G002634	0.3	0.13	0.53	0.42	MYB4	MYB4
spruce	PA_chr01_G002769	PA_chr12_G002839	0.31	0.12	0.52	0.42	MYB4	MYB4
spruce	PA_chr01_G002778	PA_chr01_G002784	0.27	0.1	0.59	0.42	MYB4	MYB4
spruce	PA_chr01_G002778	PA_chr09_G004772	0.23	0.13	0.54	0.42	MYB4	MYB46-MYB83
spruce	PA_chr01_G002782	PA_chr04_G002634	0.27	0.13	0.53	0.42	MYB4	MYB4
spruce	PA_chr01_G003821	PA_chr12_G002836	0.28	0.13	0.51	0.42	MYB4	MYB4
spruce	PA_chr09_G004772	PA_chr12_G002836	0.23	0.12	0.55	0.42	MYB46-MYB83	MYB4
spruce	PA_chr12_G002839	PA_chr12_G002840	0.29	0.12	0.54	0.42	MYB4	MYB4
aspen	Potra2n8c17916	Potra2n12c24750	0.33	0.12	0.49	0.41	SGR5	VND1-VND2-VND3-VND4-VND5-VND6
aspen	Potra2n8c17916	Potra2n13c25337	0.3	0.12	0.51	0.41	SGR5	VND7
aspen	Potra2n8c17916	Potra2n1c1031	0.34	0.11	0.5	0.41	SGR5	VND1-VND2-VND3-VND4-VND5-VND6
aspen	Potra2n9c19455	Potra2n8c17916	0.27	0.09	0.58	0.41	MYB46-MYB83	SGR5
spruce	PA_chr01_G002758	PA_chr01_G002778	0.25	0.09	0.58	0.41	MYB4	MYB4
spruce	PA_chr01_G002758	PA_chr01_G003821	0.26	0.11	0.54	0.41	MYB4	MYB4
spruce	PA_chr01_G002758	PA_chr12_G002839	0.27	0.12	0.51	0.41	MYB4	MYB4
spruce	PA_chr01_G002759	PA_chr01_G002778	0.26	0.09	0.58	0.41	MYB4	MYB4
spruce	PA_chr01_G002759	PA_chr12_G002840	0.27	0.1	0.57	0.41	MYB4	MYB4
spruce	PA_chr01_G002762	PA_chr09_G004772	0.23	0.12	0.52	0.41	MYB4	MYB46-MYB83
spruce	PA_chr01_G002766	PA_chr12_G002839	0.3	0.13	0.51	0.41	MYB4	MYB4
spruce	PA_chr01_G002769	PA_chr01_G002784	0.27	0.11	0.55	0.41	MYB4	MYB4
spruce	PA_chr01_G002769	PA_chr09_G004772	0.24	0.12	0.53	0.41	MYB4	MYB46-MYB83
spruce	PA_chr01_G002769	PA_chr12_G002836	0.3	0.12	0.51	0.41	MYB4	MYB4
spruce	PA_chr01_G002782	PA_chr01_G002784	0.26	0.1	0.55	0.41	MYB4	MYB4
spruce	PA_chr01_G002782	PA_chr01_G002786	0.28	0.11	0.54	0.41	MYB4	MYB4
spruce	PA_chr01_G002786	PA_chr01_G003821	0.28	0.1	0.55	0.41	MYB4	MYB4
spruce	PA_chr01_G003821	PA_chr04_G002634	0.26	0.11	0.54	0.41	MYB4	MYB4
spruce	PA_chr01_G003821	PA_chr09_G004772	0.23	0.13	0.51	0.41	MYB4	MYB46-MYB83
aspen	Potra2n4c9673	Potra2n8c17916	0.29	0.11	0.52	0.4	MYB4	SGR5
aspen	Potra2n9c18946	Potra2n19c34420	0.26	0.13	0.49	0.4	MYB4	MYB4
aspen	Potra2n8c17916	Potra2n2c4785	0.34	0.1	0.5	0.4	SGR5	NST1-NST2-NST3
spruce	PA_chr01_G002759	PA_chr01_G002769	0.28	0.1	0.53	0.4	MYB4	MYB4
spruce	PA_chr01_G002762	PA_chr01_G002769	0.27	0.1	0.54	0.4	MYB4	MYB4
spruce	PA_chr01_G002762	PA_chr01_G003821	0.24	0.1	0.55	0.4	MYB4	MYB4
spruce	PA_chr01_G002766	PA_chr01_G002782	0.26	0.1	0.54	0.4	MYB4	MYB4
spruce	PA_chr01_G002782	PA_chr12_G002836	0.3	0.1	0.52	0.4	MYB4	MYB4
spruce	PA_chr01_G002782	PA_chr12_G002839	0.3	0.1	0.51	0.4	MYB4	MYB4
spruce	PA_chr01_G002784	PA_chr01_G003821	0.26	0.09	0.56	0.4	MYB4	MYB4
spruce	PA_chr01_G002786	PA_chr12_G002836	0.29	0.11	0.51	0.4	MYB4	MYB4
spruce	PA_chr01_G003821	PA_chr12_G002839	0.25	0.1	0.53	0.4	MYB4	MYB4
spruce	PA_chr04_G002634	PA_chr12_G002839	0.28	0.11	0.5	0.4	MYB4	MYB4
aspen	Potra2n8c17916	Potra2n4c8837	0.35	0.11	0.46	0.39	SGR5	SND2-SND3
aspen	Potra2n8c17916	Potra2n14c27178	0.34	0.1	0.48	0.39	SGR5	NST1-NST2-NST3
spruce	PA_chr01_G002758	PA_chr01_G002769	0.28	0.08	0.53	0.39	MYB4	MYB4
spruce	PA_chr01_G002758	PA_chr01_G002784	0.26	0.08	0.54	0.39	MYB4	MYB4
spruce	PA_chr01_G002758	PA_chr01_G002786	0.28	0.09	0.52	0.39	MYB4	MYB4
spruce	PA_chr01_G002758	PA_chr12_G002836	0.25	0.11	0.5	0.39	MYB4	MYB4
spruce	PA_chr01_G002759	PA_chr01_G002782	0.25	0.08	0.54	0.39	MYB4	MYB4
spruce	PA_chr01_G002759	PA_chr01_G002786	0.28	0.09	0.53	0.39	MYB4	MYB4
spruce	PA_chr01_G002759	PA_chr01_G003821	0.24	0.08	0.55	0.39	MYB4	MYB4
spruce	PA_chr01_G002759	PA_chr04_G002634	0.26	0.1	0.51	0.39	MYB4	MYB4
spruce	PA_chr01_G002762	PA_chr01_G002782	0.21	0.1	0.53	0.39	MYB4	MYB4
spruce	PA_chr01_G002762	PA_chr01_G002784	0.21	0.1	0.53	0.39	MYB4	MYB4
spruce	PA_chr01_G002762	PA_chr01_G002786	0.27	0.08	0.53	0.39	MYB4	MYB4
spruce	PA_chr01_G002766	PA_chr01_G002784	0.25	0.08	0.54	0.39	MYB4	MYB4
spruce	PA_chr01_G002784	PA_chr01_G002786	0.28	0.09	0.54	0.39	MYB4	MYB4
spruce	PA_chr01_G002784	PA_chr12_G002839	0.29	0.09	0.52	0.39	MYB4	MYB4
spruce	PA_chr01_G002786	PA_chr12_G002839	0.29	0.1	0.51	0.39	MYB4	MYB4
spruce	PA_chr04_G002634	PA_chr12_G002836	0.28	0.11	0.5	0.39	MYB4	MYB4
spruce	PA_chr12_G002836	PA_chr12_G002839	0.29	0.12	0.48	0.39	MYB4	MYB4
spruce	PA_chr01_G002758	PA_chr01_G002762	0.21	0.08	0.54	0.38	MYB4	MYB4
spruce	PA_chr01_G002758	PA_chr01_G002766	0.26	0.09	0.51	0.38	MYB4	MYB4
spruce	PA_chr01_G002758	PA_chr01_G002782	0.26	0.08	0.53	0.38	MYB4	MYB4
spruce	PA_chr01_G002758	PA_chr04_G002634	0.26	0.1	0.51	0.38	MYB4	MYB4
spruce	PA_chr01_G002759	PA_chr01_G002762	0.22	0.08	0.55	0.38	MYB4	MYB4
spruce	PA_chr01_G002759	PA_chr01_G002766	0.25	0.08	0.53	0.38	MYB4	MYB4
spruce	PA_chr01_G002759	PA_chr01_G002784	0.23	0.08	0.54	0.38	MYB4	MYB4
spruce	PA_chr01_G002762	PA_chr01_G002766	0.24	0.08	0.54	0.38	MYB4	MYB4
spruce	PA_chr01_G002762	PA_chr12_G002836	0.25	0.09	0.51	0.38	MYB4	MYB4
spruce	PA_chr01_G002784	PA_chr04_G002634	0.27	0.08	0.53	0.38	MYB4	MYB4
spruce	PA_chr01_G002784	PA_chr12_G002836	0.26	0.08	0.52	0.38	MYB4	MYB4
aspen	Potra2n8c17916	Potra2n7c15489	0.38	0.12	0.4	0.37	SGR5	SND2-SND3
spruce	PA_chr01_G002758	PA_chr01_G002759	0.23	0.08	0.52	0.37	MYB4	MYB4
spruce	PA_chr01_G002759	PA_chr12_G002836	0.25	0.08	0.5	0.37	MYB4	MYB4
spruce	PA_chr01_G002759	PA_chr12_G002839	0.24	0.08	0.51	0.37	MYB4	MYB4
spruce	PA_chr01_G002762	PA_chr12_G002839	0.21	0.09	0.51	0.37	MYB4	MYB4
spruce	PA_chr09_G004772	PA_chr12_G002839	0.23	0.18	0.36	0.37	MYB46-MYB83	MYB4
aspen	Potra2n4c9980	Potra2n19c34420	0.27	0.11	0.45	0.36	MYB4	MYB4
aspen	Potra2n4c9980	Potra2n8c17916	0.3	0.09	0.45	0.36	MYB4	SGR5
spruce	PA_chr01_G002766	PA_chr09_G004772	0.23	0.12	0.45	0.36	MYB4	MYB46-MYB83
aspen	Potra2n19c34420	Potra2n17c31797	0.37	0.08	0.41	0.35	MYB4	SND2-SND3
aspen	Potra2n8c17916	Potra2n17c31797	0.38	0.1	0.36	0.34	SGR5	SND2-SND3
aspen	Potra2n19c34420	Potra2n7c15489	0.37	0.08	0.39	0.33	MYB4	SND2-SND3
aspen	Potra2n19c34420	Potra2n8c17916	0.33	0.11	0.36	0.33	MYB4	SGR5

## Sheet: TF-DNA
TF	Motif	pTM	ipTM	disordered	ranking_score	TF_symbol
Potra2n2c4785	DNA004	0.48	0.9	0.59	1.11	NST aspen
PA_chr09_G004772	DNA003	0.37	0.79	0.7	1.06	MYB83 spruce
PA_chr09_G004772	DNA002	0.37	0.77	0.72	1.05	MYB83 spruce
Potra2n2c4785	DNA006	0.47	0.78	0.58	1.01	NST aspen
PA_chr09_G004772	DNA004	0.35	0.69	0.71	0.98	MYB83 spruce
Potra2n2c4785	DNA002	0.47	0.72	0.58	0.96	NST aspen
Potra2n2c4785	DNA003	0.47	0.71	0.58	0.95	NST aspen
Potra2n2c4785	DNA001	0.47	0.7	0.59	0.94	NST aspen
PA_chr09_G004772	DNA001	0.34	0.64	0.71	0.94	MYB83 spruce
Potra2n2c4785	DNA005	0.47	0.68	0.59	0.93	NST aspen
Potra2n2c4785	DNA007	0.47	0.67	0.57	0.92	NST aspen
PA_chr11_G001721	DNA001	0.22	0.17	0.91	0.64	NST spruce
PA_chr11_G001721	DNA005	0.23	0.14	0.9	0.61	NST spruce
PA_chr11_G001721	DNA002	0.23	0.08	0.95	0.58	NST spruce
PA_chr11_G001721	DNA003	0.22	0.08	0.96	0.58	NST spruce
PA_chr11_G001721	DNA004	0.22	0.08	0.96	0.58	NST spruce
PA_chr11_G001721	DNA006	0.24	0.08	0.94	0.58	NST spruce
PA_chr11_G001721	DNA007	0.24	0.08	0.94	0.58	NST spruce
