# Supplementary material for: An evo-devo resource for wood: Comparative regulomics across dicot and conifer trees
Source: Research Square preprint supplement (doi:10.21203/rs.3.rs-7656402/v1), 2025-10-30
Supplement: Supplementary file 3 [file 92c16cb3cd740c73d86f9332.xlsx]

## Sheet: Notes
Table S1. Cryosections and pooled samples for each species. For each species and each replicate tree, a diagram is showing the original cryosection (Section), the sections pooled into samples for RNA-seq (Sample) and the annotated wood tissue (Tissue: Phloem, Cambium, Xylem). Samples excluded from downstream analysis are marked in the Outlier-column.

## Sheet: Birch 
Birch 1 (B3)					Birch 3				Birch 5 (B2)				Birch 4 (B1)
Section	Sample	Tissue	Outlier		Section	Sample	Tissue		Section	Sample	Tissue		Section	Sample	Tissue
1	1	Old phloem	x		1	1	Old phloem		1	1	Old phloem		1	1	Old phloem
2					2				2				2
3					3				3				3
4					4				4				4
5					5				5				5
6					6	2	Phloem		6	2	Phloem		6
7					7				7				7
8					8				8				8
9					9				9				9
10	2	Phloem			10				10				10
11					11				11				11
12					12				12				12
13					13				13				13
14					14	3	Cambium		14				14	2	Phloem
15					15	4			15				15
16					16	5			16	3	Cambium		16
17					17	6			17	4			17
18					18	7			18	5			18
19	3	Cambium			19	8			19	6			19
20	4				20	9			20	7			20	3	Cambium
21	5				21	10			21	8			21	4
22	6				22	11			22	9			22	5
23	7				23	12	Xylem		23	10	Xylem		23	6
24	8				24				24				24	7
25	9				25	13			25	11			25	8
26	10		x		26				26				26	9
27	11	Xylem	x		27	14			27	12			27	10
28					28				28				28	11
29	12		x		29	15			29	13			29	12	Xylem
30					30				30				30
31	13		x		31	16			31				31	13
32					32				32	14			32
33	14		x		33	17			33				33	14
34					34				34				34
35	15		x		35				35	15			35	15
36					36	18			36				36
37	16		x		37				37				37	16
38					38				38	16			38
39					39	19			39				39
40	17		x		40				40				40	17
41					41				41				41
42					42	20			42	17			42
43	18		x		43				43				43	18
44					44				44				44
45					45	21			45				45
46	19		x		46				46	18			46	19
47					47				47				47
48					48	22			48				48
49	20		x		49				49				49	20
50					50				50	19			50
51					51				51				51
52	21		x		52	23			52				52
53					53				53				53	21
54					54				54				54
55					55				55	20			55
56	22		x		56	24			56				56
57					57				57				57	22
58					58				58				58
59					59				59				59
60	23		x		60	25			60	21			60
61					61				61				61	23
62					62				62				62
63					63				63				63
64	24		x		64	26			64				64
65					65				65	22			65	24
66					66				66				66
67					67				67				67
68	25		x		68	27			68				68
69					69				69				69
70					70				70				70	25
71					71				71	23			71
72	26		x		72				72				72
73					73				73				73
74					74				74				74
75					75				75				75	26
76					76				76				76
77	27				77				77	24			77
78					78				78				78
79					79				79				79
80					80				80				80	27
81					81				81				81
82	28				82				82				82
83					83	28			83	25			83
84					84				84				84
85					85				85				85
86					86				86				86
					87				87				87
									88				88
									89				89
									90	26			90	28
									91				91
									92				92
									93				93
									94				94
									95				95
									96				96
									97	27			97
									98				98
									99				99
									100				100
									101				101
									102				102
									103				103
									104				104
									105				105
									106				106
									107
									108
									109
									110
									111	28
									112
									113
									114
									115
									116
									117

## Sheet: Cherry
	Cherry 3 (C3)				Cherry 1 (C1)				Cherry 2 (C2)
	Section	Sample	Tissue		Section	Sample	Tissue		Section	sample	Tissue
	1	1	Phloem		1	1	Phloem		1	1	Phloem
	2				2				2	2
	3				3				3	3	Cambium
	4				4				4	4
	5				5	2	Cambium		5	5
	6				9	3			6	6	Exp xylem
	7				7	4			7	7
	8				8	5			8
	9				9	6			9	8
	10				10	7	Exp xylem		10
	11				11	8			11	9
	12				12				12
	13	2	Cambium		13	9			13	10
	14	3			14				14
	15	4			15	10			15	11
	16	5			16				16
	17	6			17	11			17	12	Mature xtylem
	18	7			18				18
	19	8	Exp xylem		19	12			19
	20				20				20	13
	21	9			21				21
	22				22	13	Mature xylem		22
	23	10			23				23	14
	24				24				24
	25	11			25	14			25
	26				26				26	15
	27	12			27				27
	28				28	15			28
	29				29				29	16
	30	13			30				30
	31				31	16			31
	32				32				32	17
	33	14			33				33
	34				34				34
	35				35	17			35
	36	15	Mature xylem		36				36	18
	37				37				37
	38				38				38
	39	16			39	18			39
	40				40				40	19
	41				41				41
	42				42				42
	43	17			43	19			43
	44				44				44	20
	45				45				45
	46				46				46
	47	18			47	20			47
	48				48				48	21
	49				49				49
	50				50				50
	51	19			51				51
	52				52	21			52	22
	53				53				53
	54				54				54
	55	20			55				55
	56				56				56
	57				57	22			57	23
	58				58				58
	59				59				59
	60	21			60				60
	61				61				61
	62				62	23			62	24
	63				63				63
	64				64				64
	65	22			65				65
	66				66				66
	67				67	24			67	25
	68				68				68
	69				69				69
	70	23			70				70
	71				71				71
	72				72				72	26
	73				73	25			73
	74				74				74
	75	24			75				75
	76				76				76
	77				77				77	27
	78				78				78
	79				79	26			79
	80				80				80
	81	25			81				81
	82				82				82	28	Previous year wood
	83				83				83
	84				84				84
	85				85	27			85
	86				86				86
	87	26			87				87
	88				88				88
	89				89				89
	90				90				90
	91				91				91
	92				92				92
	93	27			93				93
	94				94	28	Previous year wood
	95				95
	96				96
	97				97
	98				98
	99	28	Previous year wood		99
	100				100
	101				101
	102				102
	103				103
	104				104
	105				105
	106				106
	107				107
	108				108
	109				109
	110				110
	111				111
	112				112
	113				113
	114				114
	115				115
	116				116
	117				117
	118				118
	119				119
	120				120
	121				121
	122				122
	123				123
	124				124
	125				125
	126				126
	127				127
	128				128
	129				129
	130				130
	131				131
	132				132
	133				133
	134				134
	135				135
	136				136
	137				137
	138				138
	139				139
	140				140
	141				141
	142				142
	143				143
	144				144
	145				145
	146				146
	147				147
	148				148
	149				149
	150				150
	151				151
	152				152
	153				153
	154				154
	155				155
	156				156
	157				157
	158				158
	159				159
	160				160

## Sheet: Norway spruce
Spruce 1 (N3)					Spruce 2 (N2)					Spruce 3 (N1)
Section	Sample	Tissue	Outlier		Section	Sample	Tissue	Outlier		Section	Sample	Tissue
1		Phloem	x		1		Old Phloem			1		Old Phloem
2					2					2
3					3					3
4					4					4	1
5					5					5		Phloem
6					6	1				6
7					7		Phloem			7
8					8					8
9					9					9
10					10					10
11	1				11	2.1				11
12	2	Cambium			12					12
13	3				13					13
14	4				14					14
15	5				15					15
16	6				16	2.2				16
17	7				17					17
18	8				18					18
19	9				19					19
20	10				20					20
21		Expanding xylem			21	2.3				21
22	11				22	3	Cambium			22	2
23					23	4		x		23	3	Cambium
24					24	5		x		24	4
25	12				25	6		x		25	5
26					26	7		x		26	6
27					27	8		x		27	7
28					28	9		x		28	8
29	13				29		Expanding xylem	x		29		Expanding xylem
30		Mature xylem			30	10				30	9
31					31					31
32					32					32	10
33					33	11				33
34	14				34					34
35					35					35	11
36					36					36
37					37	12				37
38					38					38	12
39					39					39
40	15				40					40
41					41	13				41
42					42		Mature xylem			42	13
43					43					43		Mature xylem
44					44					44
45					45					45
46	16				46	14				46	14
47					47					47
48					48					48
49					49					49
50					50					50
51					51	15				51	15
52					52			x		52
53	17				53					53
54					54					54
55					55					55
56					56	16				56	16
57					57			x		57
58					58					58
59					59					59
60	18				60					60
61					61					61
62					62	17				62	17
63					63			x		63
64					64					64
65					65					65
66					66					66
67					67					67
68	19				68	18				68	18
69					69					69
70					70					70
71					71					71
72					72					72
73					73					73
74					74					74	19
75					75	19				75
76	20				76					76
77					77					77
78					78					78
79					79					79
80					80					80
81					81					81	20
82					82	20				82
83					83					83
84					84					84
85	21				85					85
86					86					86
87					87					87
88					88					88	21
89					89					89
90					90	21				90
91					91					91
92					92					92
93					93					93
94	22				94					94
95					95					95
96					96					96	22
97					97					97
98					98	22				98
99					99					99
100					100					100
101					101					101
102					102					102
103					103					103
104	23				104					104	23
105					105					105
106					106					106
107					107	23				107
108					108					108
109					109					109
110					110					110
111					111					111
112					112					112
113					113					113	24
114	24				114					114
115					115					115
116					116	24				116
117					117			x		117
118					118					118
119					119					119
120					120					120
121					121					121
122					122					122	25
123					123					123
124					124					124
125	25				125					125
126					126	25				126
127					127			x		127
128					128					128
129					129					129
130					130					130
131					131					131
132					132					132	26
133					133					133
134					134					134
135					135					135
136	26				136	26				136
137					137			x		137
138					138					138
139					139					139
140					140					140
141					141					141
142					142					142	27
143					143					143		Previous year wood
144					144					144
145					145					145
146					146	27				146
147					147		Previous year wood	x		147
148	27				148					148
149					149					149
150					150	28				150	28
151
152
153
154
155
156
157
158
159
160	28	Previous year wood

## Sheet: Scots pine
Scots pine 2 (S1)				Scots pine 4 (S2)				Scots pine 5 (S3)				Scots pine 3
Section	Sample	Tissue		Section	Sample	Tissue		Section	Sample	Tissue		Section	Sample	Tissue
1	1	Old phloem		1	1	Phloem		1	1	Phloem		1	1	Phloem
2				2				2				2
3				3				3				3
4				4				4				4
5				5				5				5
6				6				6				6
7				7				7				7
8				8				8				8
9				9				9				9	2	Cambium
10				10	2	Cambium		10				10	3
11				11	3			11				11	4
12				12	4			12				12	5
13				13	5			13				13	6
14				14	6			14				14	7
15				15	7			15	2	Cambium		15	8
16	2	Phloem		16	8			16	3			16	9
17				17	9			17	4			17	10
18				18	10	Xylem		18	5			18	11	Xylem
19				19				19	6			19
20				20	11			20	7			20	12
21				21				21	8			21
22	3	Cambium		22	12			22	9			22	13
23	4			23				23	10			23
24	5			24	13			24	11	Xylem		24	14
25	6			25				25				25
26	7			26				26	12			26
27	8			27	14			27				27	15
28	9			28				28	13			28
29	10			29				29				29
30	11	Xylem		30	15			30				30	16
31				31				31	14			31
32	12			32				32				32
33				33	16			33				33	17
34	13			34				34	15			34
35				35				35				35
36	14			36				36				36
37				37	17			37				37	18
38				38				38	16			38
39	15			39				39				39
40				40				40				40
41				41	18			41				41	19
42	16			42				42	17			42
43				43				43				43
44				44				44				44
45	17			45	19			45				45	20
46				46				46				46
47				47				47	18			47
48				48				48				48
49	18			49				49				49
50				50	20			50				50	21
51				51				51				51
52				52				52	19			52
53	19			53				53				53
54				54				54				54
55				55	21			55				55	22
56				56				56				56
57	20			57				57				57
58				58				58	20			58
59				59				59				59
60				60	22			60				60	23
61				61				61				61
62	21			62				62				62
63				63				63				63
64				64				64	21			64
65				65				65				65
66				66	23			66				66	24
67	22			67				67				67
68				68				68				68
69				69				69				69
70				70				70				70
71				71				71	22			71
72	23			72	24			72				72	25
73				73				73				73
74				74				74				74
75				75				75				75
76				76				76				76
77				77				77				77
78	24			78	25			78	23			78	26
79				79				79				79
80				80				80				80
81				81				81				81
82				82				82				82
83				83				83				83
84	25			84				84				84
85				85	26			85				85	27
86				86				86	24			86
87				87				87				87
88				88				88				88
89				89				89				89
90	26			90				90				90
91				91				91				91
92				92	27			92				92
93				93				93				93
94				94				94	25			94
95				95				95				95
96				96				96				96
97	27			97				97				97
98				98				98				98
99				99	28			99				99
100				100				100				100	28
101				101				101				101
102				102				102	26			102
103				103				103				103
104	28			104				104				104
105				105				105				105
106				106				106				106
107								107				107
108								108				108
109								109				109
110								110				110
								111	27
								112
								113
								114
								115
								116
								117
								118
								119
								120
								121
								122
								123
								124	28
								125
								126
								127
								128

## Sheet: Lodgepole pine
		Lodgepole pine 2 (L1)						Lodgepole pine 3 (L2)						Lodgepole pine 5 (L3)
		Section	Sample	Tissue				Section	Sample	Tissue				Section	Sample	Tissue
		1	1	Phloem				1	1	Phloem				1	1	Phloem
		2						2						2
		3						3						3
		4						4						4
		5						5						5
		6						6						6	2	Cambium
		7						7						7	3
		8						8						8	4
		9						9						9	5
		10	2	Cambium				10	2	Cambium				10	6
		11						11	3					11	7
		12	3					12	4					12	8
		13						13	5					13	9	Exp xylem
		14	4					14	6					14
		15						15	7					15	10
		16	5					16	8					16
		17						17	9	Exp xylem				17	11
		18	6					18						18
		19						19	10					19	12
		20	7	Exp xylem				20						20
		21						21	11					21	13	Mature xylem
		22	8					22						22
		23						23	12					23
		24	9					24						24	14
		25						25	13	Mature xylem				25
		26	10					26						26
		27						27	14					27	15
		28	11	Mature xylem				28						28
		29						29						29
		30	12					30	15					30	16
		31						31						31
		32						32						32
		33	13					33	16					33	17
		34						34						34
		35						35						35
		36	14					36	17					36
		37						37						37	18
		38						38						38
		39	15					39	18					39
		40						40						40
		41						41						41	19
		42	16					42	19					42
		43						43						43
		44						44						44
		45						45						45	20
		46	17					46	20					46
		47						47						47
		48						48						48
		49						49						49	21
		50	18					50	21					50
		51						51						51
		52						52						52
		53						53						53
		54	19					54	22					54	22
		55						55						55
		56						56						56
		57						57						57
		58	20					58	23					58
		59						59						59	23
		60						60						60
		61						61						61
		62						62	24					62
		63	21					63						63
		64						64						64	24
		65						65						65
		66						66						66
		67						67	25					67
		68	22					68						68
		69						69						69	25
		70						70						70
		71						71						71
		72						72	26					72
		73	23					73						73
		74						74						74
		75						75						75	26
		76						76						76
		77						77	27	Previous year wood				77
		78	24					78						78
		79						79						79
		80						80						80
		81						81						81	27	Previous year wood
		82						82						82
		83						83						83
		84	25					84						84
		85						85						85
		86						86						86
		87						87	28					87
		88						88						88
		89						89						89
		90	26					90						90
		91						91						91
		92						92						92
		93						93						93
		94						94						94	28
		95						95						95
		96	27					96						96
		97												97
		98												98
		99												99
		100												100
		101
		102
		103
		104
		105
		106
		107
		108
		109
		110
		111
		112
		113
		114
		115	28	Previous year wood
		116
		117
		118
		119
		120
		121
		122
		123
		124
		125
		126
		127
		128
