# Supplementary material for: An evo-devo resource for wood: Comparative regulomics across dicot and conifer trees
Source: Research Square preprint supplement (doi:10.21203/rs.3.rs-7656402/v1), 2025-10-30
Supplement: Supplementary file 4 [file b1a77e2749f5dd414ac9eb7c.xlsx]

## Sheet: GO conserved genes
GO id	P-value	x	n	GO term
GO:0071840	3.61e-26	656	2892	cellular component organization or biogenesis
GO:0016192	6.54e-20	174	558	vesicle-mediated transport
GO:0044085	1.65e-17	396	1689	cellular component biogenesis
GO:0006996	3.39e-17	318	1291	organelle organization
GO:0016043	1.04e-15	477	2167	cellular component organization
GO:0007049	7.30e-14	162	579	cell cycle
GO:0007010	3.94e-12	106	345	cytoskeleton organization
GO:0042254	8.64e-12	207	833	ribosome biogenesis
GO:0007017	1.54e-11	97	312	microtubule-based process
GO:0070925	4.26e-11	75	222	organelle assembly
GO:0022613	2.31e-10	221	934	ribonucleoprotein complex biogenesis
GO:0022402	3.35e-10	118	425	cell cycle process
GO:0005976	8.94e-10	159	631	polysaccharide metabolic process
GO:0140694	1.46e-09	61	178	non-membrane-bounded organelle assembly
GO:0071669	2.60e-09	59	172	plant-type cell wall organization or biogenesis
GO:0033260	3.15e-09	17	24	nuclear DNA replication
GO:0006270	4.53e-09	25	47	DNA replication initiation
GO:0072583	6.50e-09	19	30	clathrin-dependent endocytosis
GO:0071554	1.50e-08	118	451	cell wall organization or biogenesis
GO:0030244	1.52e-08	34	80	cellulose biosynthetic process
GO:0042273	1.63e-08	46	126	ribosomal large subunit biogenesis
GO:0006898	3.18e-08	20	35	receptor-mediated endocytosis
GO:0000226	4.18e-08	65	210	microtubule cytoskeleton organization
GO:0000278	5.23e-08	75	256	mitotic cell cycle
GO:1903047	6.52e-08	62	199	mitotic cell cycle process
GO:0007018	6.64e-08	41	111	microtubule-based movement
GO:0051649	6.90e-08	169	721	establishment of localization in cell
GO:0000271	7.72e-08	71	240	polysaccharide biosynthetic process
GO:0016050	8.78e-08	40	108	vesicle organization
GO:0044042	9.47e-08	132	535	glucan metabolic process
GO:0140056	1.09e-07	32	78	organelle localization by membrane tethering
GO:0022406	1.09e-07	32	78	membrane docking
GO:0009832	1.29e-07	48	142	plant-type cell wall biogenesis
GO:0051640	1.32e-07	52	159	organelle localization
GO:0006897	1.66e-07	27	61	endocytosis
GO:0048193	1.75e-07	70	240	Golgi vesicle transport
GO:0015031	2.01e-07	169	732	protein transport
GO:0046907	3.04e-07	158	679	intracellular transport
GO:0006267	4.27e-07	8	8	pre-replicative complex assembly involved in nuclear cell cycle DNA replication
GO:0036388	4.27e-07	8	8	pre-replicative complex assembly
GO:1902299	4.27e-07	8	8	pre-replicative complex assembly involved in cell cycle DNA replication
GO:0051225	4.43e-07	22	46	spindle assembly
GO:0009225	4.82e-07	38	106	nucleotide-sugar metabolic process
GO:0006886	4.95e-07	119	484	intracellular protein transport
GO:0051641	6.21e-07	239	1120	cellular localization
GO:0048268	6.22e-07	14	22	clathrin coat assembly
GO:0061640	6.73e-07	19	37	cytoskeleton-dependent cytokinesis
GO:0071555	1.05e-06	80	298	cell wall organization
GO:0005982	1.27e-06	111	452	starch metabolic process
GO:0008104	1.28e-06	200	918	protein localization
GO:0030243	1.29e-06	40	118	cellulose metabolic process
GO:0070727	1.62e-06	200	921	cellular macromolecule localization
GO:0051726	1.65e-06	72	263	regulation of cell cycle
GO:0005985	2.26e-06	109	447	sucrose metabolic process
GO:0000281	2.70e-06	16	30	mitotic cytokinesis
GO:0051274	3.40e-06	34	97	beta-glucan biosynthetic process
GO:0006900	3.87e-06	22	51	vesicle budding from membrane
GO:0007051	4.67e-06	30	82	spindle organization
GO:0005984	4.80e-06	110	459	disaccharide metabolic process
GO:0045229	4.93e-06	82	319	external encapsulating structure organization
GO:0048278	5.39e-06	25	63	vesicle docking
GO:0009250	5.48e-06	45	146	glucan biosynthetic process
GO:0007059	5.66e-06	42	133	chromosome segregation
GO:0009311	5.86e-06	111	466	oligosaccharide metabolic process
GO:0009834	6.15e-06	31	87	plant-type secondary cell wall biogenesis
GO:0006891	7.25e-06	21	49	intra-Golgi vesicle-mediated transport
GO:0000027	8.28e-06	22	53	ribosomal large subunit assembly
GO:0045184	8.47e-06	181	840	establishment of protein localization
GO:0051273	1.52e-05	40	129	beta-glucan metabolic process
GO:0051179	2.02e-05	515	2762	localization
GO:0006261	2.69e-05	46	159	DNA-templated DNA replication
GO:0051301	2.79e-05	60	225	cell division
GO:0009833	3.00e-05	14	28	plant-type primary cell wall biogenesis
GO:0042546	3.29e-05	56	207	cell wall biogenesis
GO:1902531	3.37e-05	16	35	regulation of intracellular signal transduction
GO:0009664	4.54e-05	25	70	plant-type cell wall organization
GO:0033036	5.34e-05	218	1071	macromolecule localization
GO:0000727	6.30e-05	9	14	double-strand break repair via break-induced replication
GO:0016560	6.30e-05	9	14	protein import into peroxisome matrix, docking
GO:0098657	6.44e-05	29	88	import into cell
GO:0031023	6.56e-05	12	23	microtubule organizing center organization
GO:0022607	6.75e-05	174	831	cellular component assembly
GO:0006011	7.81e-05	20	52	UDP-glucose metabolic process
GO:0000910	8.09e-05	23	64	cytokinesis
GO:0070592	8.79e-05	31	98	cell wall polysaccharide biosynthetic process
GO:0006904	9.83e-05	15	34	vesicle docking involved in exocytosis
GO:0006810	1.05e-04	471	2544	transport
GO:0006412	1.24e-04	204	1007	translation
GO:0009226	1.27e-04	17	42	nucleotide-sugar biosynthetic process
GO:0140029	1.47e-04	15	35	exocytic process
GO:0010256	1.84e-04	39	138	endomembrane system organization
GO:0006753	1.94e-04	150	715	nucleoside phosphate metabolic process
GO:0005975	2.04e-04	256	1310	carbohydrate metabolic process
GO:0006260	2.26e-04	59	236	DNA replication
GO:0000075	2.41e-04	22	64	cell cycle checkpoint signaling
GO:0051234	2.60e-04	488	2669	establishment of localization
GO:0044770	2.61e-04	34	117	cell cycle phase transition
GO:1902969	2.65e-04	9	16	mitotic DNA replication
GO:1901988	3.10e-04	22	65	negative regulation of cell cycle phase transition
GO:0097435	3.25e-04	41	151	supramolecular fiber organization
GO:0044036	3.47e-04	43	161	cell wall macromolecule metabolic process
GO:0051650	3.57e-04	11	23	establishment of vesicle localization
GO:0051648	3.57e-04	11	23	vesicle localization
GO:0006903	3.57e-04	11	23	vesicle targeting
GO:0016558	3.57e-04	11	23	protein import into peroxisome matrix
GO:0045333	4.08e-04	57	231	cellular respiration
GO:0071705	4.44e-04	195	979	nitrogen compound transport
GO:0000122	4.50e-04	12	27	negative regulation of transcription by RNA polymerase II
GO:0044786	4.70e-04	23	71	cell cycle DNA replication
GO:0071692	4.83e-04	9	17	protein localization to extracellular region
GO:0009306	4.83e-04	9	17	protein secretion
GO:0035592	4.83e-04	9	17	establishment of protein localization to extracellular region
GO:0032482	5.32e-04	21	63	Rab protein signal transduction
GO:0042255	5.43e-04	32	112	ribosome assembly
GO:1903338	5.45e-04	5	6	regulation of cell wall organization or biogenesis
GO:1990116	5.45e-04	5	6	ribosome-associated ubiquitin-dependent protein catabolic process
GO:0015980	5.47e-04	63	264	energy derivation by oxidation of organic compounds
GO:0051261	6.04e-04	18	51	protein depolymerization
GO:0010383	6.36e-04	39	146	cell wall polysaccharide metabolic process
GO:0030029	6.39e-04	35	127	actin filament-based process
GO:1902975	6.55e-04	4	4	mitotic DNA replication initiation
GO:0048209	6.55e-04	4	4	regulation of vesicle targeting, to, from or within Golgi
GO:0030174	6.55e-04	4	4	regulation of DNA-templated DNA replication initiation
GO:0080165	6.55e-04	4	4	callose deposition in phloem sieve plate
GO:1902315	6.55e-04	4	4	nuclear cell cycle DNA replication initiation
GO:1902292	6.55e-04	4	4	cell cycle DNA replication initiation
GO:0006065	6.55e-04	4	4	UDP-glucuronate biosynthetic process
GO:0032940	6.70e-04	30	104	secretion by cell
GO:0007264	7.99e-04	33	119	small GTPase-mediated signal transduction
GO:1901987	8.26e-04	24	78	regulation of cell cycle phase transition
GO:0007155	8.30e-04	9	18	cell adhesion
GO:0010948	8.35e-04	26	87	negative regulation of cell cycle process
GO:0009566	9.05e-04	6	9	fertilization
GO:0009060	9.16e-04	54	223	aerobic respiration
GO:0042732	9.48e-04	8	15	D-xylose metabolic process
GO:0010564	1.04e-03	36	135	regulation of cell cycle process
GO:0030036	1.13e-03	34	126	actin cytoskeleton organization
GO:0000470	1.37e-03	17	50	maturation of LSU-rRNA
GO:0045491	1.48e-03	22	72	xylan metabolic process
GO:0007030	1.65e-03	18	55	Golgi organization
GO:0007035	1.65e-03	5	7	vacuolar acidification
GO:0051452	1.65e-03	5	7	intracellular pH reduction
GO:0016482	1.85e-03	16	47	cytosolic transport
GO:0000076	1.87e-03	7	13	DNA replication checkpoint signaling
GO:0033037	1.87e-03	7	13	polysaccharide localization
GO:0030242	1.96e-03	6	10	autophagy of peroxisome
GO:0046903	2.09e-03	30	111	secretion
GO:0052546	2.11e-03	9	20	cell wall pectin metabolic process
GO:0048609	2.15e-03	42	170	multicellular organismal reproductive process
GO:0055086	2.33e-03	171	875	nucleobase-containing small molecule metabolic process
GO:0006906	2.37e-03	16	48	vesicle fusion
GO:0007033	2.37e-03	23	79	vacuole organization
GO:0048015	2.65e-03	8	17	phosphatidylinositol-mediated signaling
GO:0031570	2.67e-03	13	36	DNA integrity checkpoint signaling
GO:1901293	2.71e-03	61	270	nucleoside phosphate biosynthetic process
GO:0007015	2.81e-03	30	113	actin filament organization
GO:1990481	2.86e-03	4	5	mRNA pseudouridine synthesis
GO:0080173	2.86e-03	4	5	male-female gamete recognition during double fertilization forming a zygote and endosperm
GO:0009567	2.86e-03	4	5	double fertilization forming a zygote and endosperm
GO:0042350	2.86e-03	4	5	GDP-L-fucose biosynthetic process
GO:0046398	2.86e-03	4	5	UDP-glucuronate metabolic process
GO:0046368	2.86e-03	4	5	GDP-L-fucose metabolic process
GO:0061936	2.86e-03	4	5	fusion of sperm to egg plasma membrane involved in double fertilization forming a zygote and endosperm
GO:0045026	2.86e-03	4	5	plasma membrane fusion
GO:0000070	2.91e-03	19	62	mitotic sister chromatid segregation
GO:0045786	2.96e-03	27	99	negative regulation of cell cycle
GO:0006119	3.04e-03	42	173	oxidative phosphorylation
GO:0045492	3.19e-03	18	58	xylan biosynthetic process
GO:0009298	3.23e-03	7	14	GDP-mannose biosynthetic process
GO:0019673	3.23e-03	7	14	GDP-mannose metabolic process
GO:0048229	3.31e-03	31	119	gametophyte development
GO:0043574	3.61e-03	11	29	peroxisomal transport
GO:0015919	3.61e-03	11	29	peroxisomal membrane transport
GO:0072662	3.61e-03	11	29	protein localization to peroxisome
GO:0072663	3.61e-03	11	29	establishment of protein localization to peroxisome
GO:0051304	3.61e-03	12	33	chromosome separation
GO:0006269	3.83e-03	5	8	DNA replication, synthesis of primer
GO:0140352	3.90e-03	34	135	export from cell
GO:0034440	4.06e-03	15	46	lipid oxidation
GO:0042147	4.06e-03	15	46	retrograde transport, endosome to Golgi
GO:0010400	4.10e-03	3	3	rhamnogalacturonan I side chain metabolic process
GO:0015742	4.10e-03	3	3	alpha-ketoglutarate transport
GO:0009963	4.10e-03	3	3	positive regulation of flavonoid biosynthetic process
GO:0071163	4.10e-03	3	3	DNA replication preinitiation complex assembly
GO:0048199	4.11e-03	8	18	vesicle targeting, to, from or within Golgi
GO:0072329	4.77e-03	18	60	monocarboxylic acid catabolic process
GO:0019321	4.78e-03	12	34	pentose metabolic process
GO:0016051	4.80e-03	100	489	carbohydrate biosynthetic process
GO:0009987	4.83e-03	1979	12087	cellular process
GO:0000422	4.89e-03	11	30	autophagy of mitochondrion
GO:0045787	4.89e-03	11	30	positive regulation of cell cycle
GO:0006888	4.99e-03	35	142	endoplasmic reticulum to Golgi vesicle-mediated transport
GO:0051643	5.22e-03	7	15	endoplasmic reticulum localization
GO:0061817	5.22e-03	7	15	endoplasmic reticulum-plasma membrane tethering
GO:0065002	5.89e-03	13	39	intracellular protein transmembrane transport
GO:0033043	6.20e-03	37	154	regulation of organelle organization
GO:0000819	6.23e-03	19	66	sister chromatid segregation
GO:0006023	6.23e-03	19	66	aminoglycan biosynthetic process
GO:0006024	6.23e-03	19	66	glycosaminoglycan biosynthetic process
GO:0000463	6.24e-03	12	35	maturation of LSU-rRNA from tricistronic rRNA transcript (SSU-rRNA, 5.8S rRNA, LSU-rRNA)
GO:0046274	6.24e-03	12	35	lignin catabolic process
GO:0051445	6.44e-03	6	12	regulation of meiotic cell cycle
GO:0061024	6.71e-03	56	254	membrane organization
GO:0032535	6.91e-03	14	44	regulation of cellular component size
GO:0009555	6.94e-03	26	100	pollen development
GO:0045488	7.19e-03	30	120	pectin metabolic process
GO:0010393	7.19e-03	30	120	galacturonan metabolic process
GO:0007009	7.48e-03	5	9	plasma membrane organization
GO:0035459	7.48e-03	5	9	vesicle cargo loading
GO:0070601	7.48e-03	4	6	centromeric sister chromatid cohesion
GO:0010395	7.48e-03	4	6	rhamnogalacturonan I metabolic process
GO:0060359	7.48e-03	4	6	response to ammonium ion
GO:0009988	7.48e-03	4	6	cell-cell recognition
GO:0008361	8.02e-03	7	16	regulation of cell size
GO:0046271	8.02e-03	12	36	phenylpropanoid catabolic process
GO:0019637	9.09e-03	189	1009	organophosphate metabolic process
GO:0045892	9.18e-03	28	112	negative regulation of DNA-templated transcription
GO:1902679	9.18e-03	28	112	negative regulation of RNA biosynthetic process
GO:0006275	9.29e-03	17	59	regulation of DNA replication
GO:0006635	9.38e-03	13	41	fatty acid beta-oxidation
GO:0061025	1.00e-02	23	88	membrane fusion
GO:0044772	1.00e-02	23	88	mitotic cell cycle phase transition
GO:0009059	1.00e-02	755	4416	macromolecule biosynthetic process
GO:0030042	1.02e-02	12	37	actin filament depolymerization
GO:1901991	1.02e-02	12	37	negative regulation of mitotic cell cycle phase transition
GO:1903510	1.02e-02	12	37	mucopolysaccharide metabolic process
GO:0006029	1.02e-02	12	37	proteoglycan metabolic process
GO:0006665	1.02e-02	31	128	sphingolipid metabolic process
GO:0048284	1.04e-02	19	69	organelle fusion
GO:0000280	1.05e-02	37	159	nuclear division
GO:0090066	1.06e-02	14	46	regulation of anatomical structure size
GO:0048285	1.13e-02	46	207	organelle fission
GO:2001251	1.16e-02	10	29	negative regulation of chromosome organization
GO:0007093	1.16e-02	13	42	mitotic cell cycle checkpoint signaling
GO:0007098	1.18e-02	7	17	centrosome cycle
GO:0006085	1.21e-02	9	25	acetyl-CoA biosynthetic process
GO:0048523	1.22e-02	106	539	negative regulation of cellular process
GO:0006546	1.22e-02	8	21	glycine catabolic process
GO:0140014	1.25e-02	20	75	mitotic nuclear division
GO:0007023	1.30e-02	5	10	post-chaperonin tubulin folding pathway
GO:0015689	1.30e-02	5	10	molybdate ion transport
GO:0046177	1.30e-02	5	10	D-gluconate catabolic process
GO:0006000	1.32e-02	28	115	fructose metabolic process
GO:0022414	1.37e-02	138	724	reproductive process
GO:0044242	1.37e-02	42	188	cellular lipid catabolic process
GO:0022618	1.38e-02	48	220	protein-RNA complex assembly
GO:0050650	1.39e-02	11	34	chondroitin sulfate proteoglycan biosynthetic process
GO:0050654	1.39e-02	11	34	chondroitin sulfate proteoglycan metabolic process
GO:0030204	1.39e-02	11	34	chondroitin sulfate metabolic process
GO:0030206	1.39e-02	11	34	chondroitin sulfate biosynthetic process
GO:0032786	1.39e-02	15	52	positive regulation of DNA-templated transcription, elongation
GO:0009062	1.43e-02	13	43	fatty acid catabolic process
GO:0006272	1.44e-02	3	4	leading strand elongation
GO:0010032	1.44e-02	3	4	meiotic chromosome condensation
GO:0097190	1.44e-02	3	4	apoptotic signaling pathway
GO:0097193	1.44e-02	3	4	intrinsic apoptotic signaling pathway
GO:0036257	1.44e-02	3	4	multivesicular body organization
GO:0010344	1.44e-02	3	4	seed oilbody biogenesis
GO:0010262	1.44e-02	3	4	somatic embryogenesis
GO:0072344	1.44e-02	3	4	rescue of stalled ribosome
GO:0099022	1.44e-02	3	4	vesicle tethering
GO:0042776	1.44e-02	3	4	proton motive force-driven mitochondrial ATP synthesis
GO:0090522	1.44e-02	3	4	vesicle tethering involved in exocytosis
GO:0051306	1.50e-02	10	30	mitotic sister chromatid separation
GO:0051247	1.52e-02	38	168	positive regulation of protein metabolic process
GO:0032465	1.53e-02	4	7	regulation of cytokinesis
GO:0009962	1.53e-02	4	7	regulation of flavonoid biosynthetic process
GO:0006080	1.53e-02	4	7	substituted mannan metabolic process
GO:0006890	1.54e-02	17	62	retrograde vesicle-mediated transport, Golgi to endoplasmic reticulum
GO:0031399	1.55e-02	52	243	regulation of protein modification process
GO:0051985	1.59e-02	9	26	negative regulation of chromosome segregation
GO:0045841	1.59e-02	9	26	negative regulation of mitotic metaphase/anaphase transition
GO:1905819	1.59e-02	9	26	negative regulation of chromosome separation
GO:0007094	1.59e-02	9	26	mitotic spindle assembly checkpoint signaling
GO:0031577	1.59e-02	9	26	spindle checkpoint signaling
GO:0033046	1.59e-02	9	26	negative regulation of sister chromatid segregation
GO:0033047	1.59e-02	9	26	regulation of mitotic sister chromatid segregation
GO:0033048	1.59e-02	9	26	negative regulation of mitotic sister chromatid segregation
GO:1902100	1.59e-02	9	26	negative regulation of metaphase/anaphase transition of cell cycle
GO:2000816	1.59e-02	9	26	negative regulation of mitotic sister chromatid separation
GO:0071173	1.59e-02	9	26	spindle assembly checkpoint signaling
GO:0071174	1.59e-02	9	26	mitotic spindle checkpoint signaling
GO:0006637	1.60e-02	18	67	acyl-CoA metabolic process
GO:0035383	1.60e-02	18	67	thioester metabolic process
GO:0051253	1.66e-02	28	117	negative regulation of RNA metabolic process
GO:0006099	1.66e-02	15	53	tricarboxylic acid cycle
GO:0043087	1.66e-02	34	148	regulation of GTPase activity
GO:0001172	1.67e-02	7	18	RNA-templated transcription
GO:0046339	1.67e-02	7	18	diacylglycerol metabolic process
GO:0051656	1.69e-02	21	82	establishment of organelle localization
GO:0009395	1.70e-02	25	102	phospholipid catabolic process
GO:0006887	1.71e-02	23	92	exocytosis
GO:0051128	1.72e-02	51	239	regulation of cellular component organization
GO:0019395	1.74e-02	13	44	fatty acid oxidation
GO:0030166	1.74e-02	11	35	proteoglycan biosynthetic process
GO:0009965	1.74e-02	11	35	leaf morphogenesis
GO:0015986	1.74e-02	16	58	proton motive force-driven ATP synthesis
GO:0071826	1.75e-02	48	223	protein-RNA complex organization
GO:0034976	1.87e-02	14	49	response to endoplasmic reticulum stress
GO:0006022	1.88e-02	27	113	aminoglycan metabolic process
GO:0006487	1.89e-02	19	73	protein N-linked glycosylation
GO:0019953	1.92e-02	36	160	sexual reproduction
GO:0000079	1.93e-02	21	83	regulation of cyclin-dependent protein serine/threonine kinase activity
GO:1904029	1.93e-02	21	83	regulation of cyclin-dependent protein kinase activity
GO:0002181	1.99e-02	30	129	cytoplasmic translation
GO:0090174	2.05e-02	16	59	organelle membrane fusion
GO:0035556	2.07e-02	108	561	intracellular signal transduction
GO:0045737	2.07e-02	5	11	positive regulation of cyclin-dependent protein serine/threonine kinase activity
GO:0010193	2.07e-02	5	11	response to ozone
GO:0052545	2.07e-02	5	11	callose localization
GO:0046176	2.07e-02	5	11	aldonic acid catabolic process
GO:1904031	2.07e-02	5	11	positive regulation of cyclin-dependent protein kinase activity
GO:0008154	2.10e-02	13	45	actin polymerization or depolymerization
GO:0010639	2.11e-02	17	64	negative regulation of organelle organization
GO:0051336	2.11e-02	39	177	regulation of hydrolase activity
GO:0030203	2.15e-02	25	104	glycosaminoglycan metabolic process
GO:0045934	2.16e-02	35	156	negative regulation of nucleobase-containing compound metabolic process
GO:0016556	2.19e-02	8	23	mRNA modification
GO:0052324	2.27e-02	6	15	plant-type cell wall cellulose biosynthetic process
GO:0034410	2.27e-02	6	15	cell wall beta-glucan biosynthetic process
GO:0034406	2.27e-02	6	15	cell wall beta-glucan metabolic process
GO:0052541	2.27e-02	6	15	plant-type cell wall cellulose metabolic process
GO:0035434	2.28e-02	7	19	copper ion transmembrane transport
GO:0006086	2.28e-02	7	19	acetyl-CoA biosynthetic process from pyruvate
GO:0000902	2.35e-02	46	216	cell morphogenesis
GO:0009698	2.40e-02	25	105	phenylpropanoid metabolic process
GO:0051129	2.44e-02	17	65	negative regulation of cellular component organization
GO:0071900	2.49e-02	21	85	regulation of protein serine/threonine kinase activity
GO:0031396	2.50e-02	20	80	regulation of protein ubiquitination
GO:0018279	2.51e-02	13	46	protein N-linked glycosylation via asparagine
GO:0034964	2.56e-02	2	2	box H/ACA sno(s)RNA processing
GO:2000694	2.56e-02	2	2	regulation of phragmoplast microtubule organization
GO:0046831	2.56e-02	2	2	regulation of RNA export from nucleus
GO:0046833	2.56e-02	2	2	positive regulation of RNA export from nucleus
GO:0046521	2.56e-02	2	2	sphingoid catabolic process
GO:0051598	2.56e-02	2	2	meiotic recombination checkpoint signaling
GO:0006225	2.56e-02	2	2	UDP biosynthetic process
GO:0032467	2.56e-02	2	2	positive regulation of cytokinesis
GO:1904424	2.56e-02	2	2	regulation of GTP binding
GO:1904426	2.56e-02	2	2	positive regulation of GTP binding
GO:0000495	2.56e-02	2	2	box H/ACA sno(s)RNA 3'-end processing
GO:0000454	2.56e-02	2	2	snoRNA guided rRNA pseudouridine synthesis
GO:0044111	2.56e-02	2	2	formation of structure involved in a symbiotic process
GO:1901672	2.56e-02	2	2	positive regulation of systemic acquired resistance
GO:0032241	2.56e-02	2	2	positive regulation of nucleobase-containing compound transport
GO:0032239	2.56e-02	2	2	regulation of nucleobase-containing compound transport
GO:0033979	2.56e-02	2	2	box H/ACA sno(s)RNA metabolic process
GO:0001881	2.56e-02	2	2	receptor recycling
GO:0080065	2.56e-02	2	2	4-alpha-methyl-delta7-sterol oxidation
GO:0036258	2.56e-02	2	2	multivesicular body assembly
GO:0048200	2.56e-02	2	2	Golgi transport vesicle coating
GO:0048205	2.56e-02	2	2	COPI coating of Golgi vesicle
GO:0080001	2.56e-02	2	2	mucilage extrusion from seed coat
GO:0052093	2.56e-02	2	2	formation of specialized structure for nutrient acquisition
GO:0052096	2.56e-02	2	2	formation of syncytium involving giant cell for nutrient acquisition
GO:0009193	2.56e-02	2	2	pyrimidine ribonucleoside diphosphate metabolic process
GO:0009194	2.56e-02	2	2	pyrimidine ribonucleoside diphosphate biosynthetic process
GO:0043480	2.56e-02	2	2	pigment accumulation in tissues
GO:0043481	2.56e-02	2	2	anthocyanin accumulation in tissues in response to UV light
GO:0009188	2.56e-02	2	2	ribonucleoside diphosphate biosynthetic process
GO:0043473	2.56e-02	2	2	pigmentation
GO:0043476	2.56e-02	2	2	pigment accumulation
GO:0010405	2.56e-02	2	2	arabinogalactan protein metabolic process
GO:0043478	2.56e-02	2	2	pigment accumulation in response to UV light
GO:0043479	2.56e-02	2	2	pigment accumulation in tissues in response to UV light
GO:0043410	2.56e-02	2	2	positive regulation of MAPK cascade
GO:0043408	2.56e-02	2	2	regulation of MAPK cascade
GO:0043171	2.56e-02	2	2	peptide catabolic process
GO:0043112	2.56e-02	2	2	receptor metabolic process
GO:1903297	2.56e-02	2	2	regulation of hypoxia-induced intrinsic apoptotic signaling pathway
GO:1903298	2.56e-02	2	2	negative regulation of hypoxia-induced intrinsic apoptotic signaling pathway
GO:1902066	2.56e-02	2	2	regulation of cell wall pectin metabolic process
GO:0061723	2.56e-02	2	2	glycophagy
GO:0090058	2.56e-02	2	2	metaxylem development
GO:0061709	2.56e-02	2	2	reticulophagy
GO:0032922	2.56e-02	2	2	circadian regulation of gene expression
GO:0080119	2.56e-02	2	2	ER body organization
GO:0015774	2.56e-02	2	2	polysaccharide transport
GO:1990144	2.56e-02	2	2	intrinsic apoptotic signaling pathway in response to hypoxia
GO:0046048	2.56e-02	2	2	UDP metabolic process
GO:0009684	2.56e-02	2	2	indoleacetic acid biosynthetic process
GO:0042351	2.56e-02	2	2	'de novo' GDP-L-fucose biosynthetic process
GO:0051098	2.56e-02	2	2	regulation of binding
GO:0051099	2.56e-02	2	2	positive regulation of binding
GO:0018258	2.56e-02	2	2	protein O-linked glycosylation via hydroxyproline
GO:2000470	2.56e-02	2	2	positive regulation of peroxidase activity
GO:1902117	2.56e-02	2	2	positive regulation of organelle assembly
GO:2001108	2.56e-02	2	2	positive regulation of Rho guanyl-nucleotide exchange factor activity
GO:0055090	2.56e-02	2	2	acylglycerol homeostasis
GO:0055091	2.56e-02	2	2	phospholipid homeostasis
GO:0055089	2.56e-02	2	2	fatty acid homeostasis
GO:2001242	2.56e-02	2	2	regulation of intrinsic apoptotic signaling pathway
GO:2001243	2.56e-02	2	2	negative regulation of intrinsic apoptotic signaling pathway
GO:2001233	2.56e-02	2	2	regulation of apoptotic signaling pathway
GO:2001234	2.56e-02	2	2	negative regulation of apoptotic signaling pathway
GO:0035674	2.56e-02	2	2	tricarboxylic acid transmembrane transport
GO:0033320	2.56e-02	2	2	UDP-D-xylose biosynthetic process
GO:0033319	2.56e-02	2	2	UDP-D-xylose metabolic process
GO:0089722	2.56e-02	2	2	phosphoenolpyruvate transmembrane transport
GO:1900037	2.56e-02	2	2	regulation of cellular response to hypoxia
GO:1900038	2.56e-02	2	2	negative regulation of cellular response to hypoxia
GO:1905097	2.56e-02	2	2	regulation of guanyl-nucleotide exchange factor activity
GO:1905099	2.56e-02	2	2	positive regulation of guanyl-nucleotide exchange factor activity
GO:1902551	2.56e-02	2	2	regulation of catalase activity
GO:1902553	2.56e-02	2	2	positive regulation of catalase activity
GO:0035964	2.56e-02	2	2	COPI-coated vesicle budding
GO:0070328	2.56e-02	2	2	triglyceride homeostasis
GO:0044002	2.56e-02	2	2	acquisition of nutrients from host
GO:0009653	2.61e-02	73	367	anatomical structure morphogenesis
GO:1905818	2.61e-02	9	28	regulation of chromosome separation
GO:0010965	2.61e-02	9	28	regulation of mitotic sister chromatid separation
GO:0016237	2.67e-02	4	8	microautophagy
GO:0044804	2.67e-02	4	8	nucleophagy
GO:0031118	2.67e-02	4	8	rRNA pseudouridine synthesis
GO:0034727	2.67e-02	4	8	piecemeal microautophagy of the nucleus
GO:0090110	2.67e-02	4	8	COPII-coated vesicle cargo loading
GO:0040020	2.67e-02	4	8	regulation of meiotic nuclear division
GO:0019985	2.67e-02	4	8	translesion synthesis
GO:0010154	2.71e-02	67	334	fruit development
GO:0000045	2.83e-02	12	42	autophagosome assembly
GO:1905037	2.83e-02	12	42	autophagosome organization
GO:0046513	3.04e-02	7	20	ceramide biosynthetic process
GO:0007029	3.08e-02	14	52	endoplasmic reticulum organization
GO:0019464	3.10e-02	5	12	glycine decarboxylation via glycine cleavage system
GO:0051353	3.10e-02	5	12	positive regulation of oxidoreductase activity
GO:0006271	3.15e-02	6	16	DNA strand elongation involved in DNA replication
GO:0019521	3.15e-02	6	16	D-gluconate metabolic process
GO:0022616	3.15e-02	6	16	DNA strand elongation
GO:0048363	3.18e-02	3	5	mucilage pectin metabolic process
GO:0048358	3.18e-02	3	5	mucilage pectin biosynthetic process
GO:0031099	3.18e-02	3	5	regeneration
GO:0097178	3.18e-02	3	5	ruffle assembly
GO:0010375	3.18e-02	3	5	stomatal complex patterning
GO:1903352	3.18e-02	3	5	L-ornithine transmembrane transport
GO:1901976	3.18e-02	3	5	regulation of cell cycle checkpoint
GO:0031344	3.18e-02	3	5	regulation of cell projection organization
GO:0060491	3.18e-02	3	5	regulation of cell projection assembly
GO:0120032	3.18e-02	3	5	regulation of plasma membrane bounded cell projection assembly
GO:0120035	3.18e-02	3	5	regulation of plasma membrane bounded cell projection organization
GO:0009299	3.18e-02	3	5	mRNA transcription
GO:1990426	3.18e-02	3	5	mitotic recombination-dependent replication fork processing
GO:0015822	3.18e-02	3	5	ornithine transport
GO:0031529	3.18e-02	3	5	ruffle organization
GO:1902298	3.18e-02	3	5	cell cycle DNA replication maintenance of fidelity
GO:1990505	3.18e-02	3	5	mitotic DNA replication maintenance of fidelity
GO:0031998	3.18e-02	3	5	regulation of fatty acid beta-oxidation
GO:0033313	3.18e-02	3	5	meiotic cell cycle checkpoint signaling
GO:1900027	3.18e-02	3	5	regulation of ruffle assembly
GO:0051446	3.18e-02	3	5	positive regulation of meiotic cell cycle
GO:0051754	3.18e-02	3	5	meiotic sister chromatid cohesion, centromeric
GO:1901873	3.20e-02	20	82	regulation of post-translational protein modification
GO:1903320	3.20e-02	20	82	regulation of protein modification by small protein conjugation or removal
GO:0009808	3.20e-02	20	82	lignin metabolic process
GO:0044743	3.22e-02	19	77	protein transmembrane import into intracellular organelle
GO:0009741	3.22e-02	19	77	response to brassinosteroid
GO:0010410	3.24e-02	26	113	hemicellulose metabolic process
GO:0070507	3.27e-02	9	29	regulation of microtubule cytoskeleton organization
GO:1903052	3.27e-02	9	29	positive regulation of proteolysis involved in protein catabolic process
GO:0051784	3.37e-02	12	43	negative regulation of nuclear division
GO:1901137	3.90e-02	96	506	carbohydrate derivative biosynthetic process
GO:0010191	3.94e-02	7	21	mucilage metabolic process
GO:0043622	3.94e-02	7	21	cortical microtubule organization
GO:0071616	4.02e-02	9	30	acyl-CoA biosynthetic process
GO:0035384	4.02e-02	9	30	thioester biosynthetic process
GO:0098813	4.04e-02	20	84	nuclear chromosome segregation
GO:0006754	4.19e-02	16	64	ATP biosynthetic process
GO:0032784	4.19e-02	16	64	regulation of DNA-templated transcription elongation
GO:0051781	4.20e-02	4	9	positive regulation of cell division
GO:0032790	4.20e-02	4	9	ribosome disassembly
GO:0000731	4.20e-02	4	9	DNA synthesis involved in DNA repair
GO:0048825	4.20e-02	4	9	cotyledon development
GO:0045903	4.20e-02	4	9	positive regulation of translational fidelity
GO:0035494	4.20e-02	4	9	SNARE complex disassembly
GO:0031537	4.20e-02	4	9	regulation of anthocyanin metabolic process
GO:1902115	4.20e-02	4	9	regulation of organelle assembly
GO:1902626	4.20e-02	4	9	assembly of large subunit precursor of preribosome
GO:0033962	4.23e-02	6	17	P-body assembly
GO:0010192	4.23e-02	6	17	mucilage biosynthetic process
GO:0010638	4.23e-02	6	17	positive regulation of organelle organization
GO:0050000	4.23e-02	6	17	chromosome localization
GO:0019520	4.23e-02	6	17	aldonic acid metabolic process
GO:0031109	4.32e-02	10	35	microtubule polymerization or depolymerization
GO:0032447	4.38e-02	5	13	protein urmylation
GO:0009051	4.38e-02	5	13	pentose-phosphate shunt, oxidative branch
GO:0071902	4.38e-02	5	13	positive regulation of protein serine/threonine kinase activity
GO:0009958	4.38e-02	5	13	positive gravitropism
GO:0051341	4.38e-02	5	13	regulation of oxidoreductase activity
GO:0006364	4.44e-02	53	264	rRNA processing
GO:0003002	4.53e-02	11	40	regionalization
GO:1903825	4.53e-02	11	40	organic acid transmembrane transport
GO:1905039	4.53e-02	11	40	carboxylic acid transmembrane transport
GO:0016042	4.57e-02	47	231	lipid catabolic process
GO:0009627	4.66e-02	12	45	systemic acquired resistance
GO:0033044	4.66e-02	12	45	regulation of chromosome organization
GO:0051052	4.76e-02	26	117	regulation of DNA metabolic process
GO:0007031	4.78e-02	14	55	peroxisome organization
GO:0044784	4.89e-02	9	31	metaphase/anaphase transition of cell cycle
GO:0030071	4.89e-02	9	31	regulation of mitotic metaphase/anaphase transition
GO:0007091	4.89e-02	9	31	metaphase/anaphase transition of mitotic cell cycle
GO:1902099	4.89e-02	9	31	regulation of metaphase/anaphase transition of cell cycle
GO:0090114	4.89e-02	9	31	COPII-coated vesicle budding
GO:1901135	4.94e-02	175	975	carbohydrate derivative metabolic process
GO:0043933	4.95e-02	128	698	protein-containing complex organization

## Sheet: GO differentiated genes
GO id	P-value	x	n	GO term
GO:0010167	4.24e-05	7	48	response to nitrate
GO:0005992	9.60e-05	6	38	trehalose biosynthetic process
GO:0009311	1.69e-04	22	466	oligosaccharide metabolic process
GO:0005991	1.95e-04	6	43	trehalose metabolic process
GO:1901698	2.30e-04	9	104	response to nitrogen compound
GO:0005982	2.94e-04	21	452	starch metabolic process
GO:0005984	3.61e-04	21	459	disaccharide metabolic process
GO:0032889	3.96e-04	2	2	regulation of vacuole fusion, non-autophagic
GO:0045992	3.96e-04	2	2	negative regulation of embryonic development
GO:0051469	3.96e-04	2	2	vesicle fusion with vacuole
GO:1901699	4.05e-04	6	49	cellular response to nitrogen compound
GO:0046351	5.60e-04	6	52	disaccharide biosynthetic process
GO:0005985	6.57e-04	20	447	sucrose metabolic process
GO:0071249	7.84e-04	5	37	cellular response to nitrate
GO:1902170	7.84e-04	5	37	cellular response to reactive nitrogen species
GO:0005976	8.62e-04	25	631	polysaccharide metabolic process
GO:0009312	9.19e-04	6	57	oligosaccharide biosynthetic process
GO:0044042	1.09e-03	22	535	glucan metabolic process
GO:0002940	1.17e-03	2	3	tRNA N2-guanine methylation
GO:0010394	1.17e-03	2	3	homogalacturonan metabolic process
GO:0010289	1.17e-03	2	3	homogalacturonan biosynthetic process
GO:0015780	1.21e-03	6	60	nucleotide-sugar transmembrane transport
GO:0046777	1.27e-03	10	158	protein autophosphorylation
GO:0030245	1.93e-03	5	45	cellulose catabolic process
GO:0051275	1.93e-03	5	45	beta-glucan catabolic process
GO:0097576	2.31e-03	2	4	vacuole fusion
GO:1903601	2.31e-03	2	4	thermospermine metabolic process
GO:1903602	2.31e-03	2	4	thermospermine catabolic process
GO:0042144	2.31e-03	2	4	vacuole fusion, non-autophagic
GO:0046208	2.31e-03	2	4	spermine catabolic process
GO:0045036	2.98e-03	3	15	protein targeting to chloroplast
GO:0002764	3.80e-03	2	5	immune response-regulating signaling pathway
GO:0002757	3.80e-03	2	5	immune response-activating signaling pathway
GO:0002758	3.80e-03	2	5	innate immune response-activating signaling pathway
GO:0002221	3.80e-03	2	5	pattern recognition receptor signaling pathway
GO:0006633	4.25e-03	9	157	fatty acid biosynthetic process
GO:0016052	5.03e-03	15	354	carbohydrate catabolic process
GO:0015931	5.21e-03	9	162	nucleobase-containing compound transport
GO:0070407	5.63e-03	2	6	oxidation-dependent protein catabolic process
GO:0035542	5.63e-03	2	6	regulation of SNARE complex assembly
GO:0002253	5.63e-03	2	6	activation of immune response
GO:0002218	5.63e-03	2	6	activation of innate immune response
GO:0009069	5.80e-03	32	1005	serine family amino acid metabolic process
GO:0009251	6.32e-03	5	59	glucan catabolic process
GO:0006796	6.42e-03	77	2967	phosphate-containing compound metabolic process
GO:0016311	6.48e-03	17	435	dephosphorylation
GO:0006793	6.53e-03	77	2969	phosphorus metabolic process
GO:0052546	6.94e-03	3	20	cell wall pectin metabolic process
GO:0044088	7.78e-03	2	7	regulation of vacuole organization
GO:0032875	8.03e-03	4	40	regulation of DNA endoreduplication
GO:0009057	8.41e-03	29	910	macromolecule catabolic process
GO:0000272	8.58e-03	8	145	polysaccharide catabolic process
GO:0035493	1.02e-02	2	8	SNARE complex assembly
GO:1901701	1.18e-02	13	319	cellular response to oxygen-containing compound
GO:0005975	1.20e-02	38	1310	carbohydrate metabolic process
GO:0050778	1.30e-02	2	9	positive regulation of immune response
GO:0002684	1.30e-02	2	9	positive regulation of immune system process
GO:0042761	1.30e-02	2	9	very long-chain fatty acid biosynthetic process
GO:0045089	1.30e-02	2	9	positive regulation of innate immune response
GO:0016125	1.42e-02	6	99	sterol metabolic process
GO:0051273	1.48e-02	7	129	beta-glucan metabolic process
GO:0090329	1.51e-02	4	48	regulation of DNA-templated DNA replication
GO:0007178	1.54e-02	10	226	cell surface receptor protein serine/threonine kinase signaling pathway
GO:1900424	1.60e-02	2	10	regulation of defense response to bacterium
GO:0016051	1.89e-02	17	489	carbohydrate biosynthetic process
GO:0000038	1.93e-02	2	11	very long-chain fatty acid metabolic process
GO:0002833	1.93e-02	2	11	positive regulation of response to biotic stimulus
GO:0032366	1.93e-02	2	11	intracellular sterol transport
GO:0006517	1.93e-02	2	11	protein deglycosylation
GO:0032103	1.93e-02	2	11	positive regulation of response to external stimulus
GO:0031349	1.93e-02	2	11	positive regulation of defense response
GO:0045995	1.93e-02	2	11	regulation of embryonic development
GO:0015918	1.93e-02	2	11	sterol transport
GO:0042023	1.98e-02	4	52	DNA endoreduplication
GO:0008202	2.13e-02	9	204	steroid metabolic process
GO:0007167	2.23e-02	10	240	enzyme-linked receptor protein signaling pathway
GO:0032881	2.29e-02	2	12	regulation of polysaccharide metabolic process
GO:0032885	2.29e-02	2	12	regulation of polysaccharide biosynthetic process
GO:0052325	2.29e-02	2	12	cell wall pectin biosynthetic process
GO:0010962	2.29e-02	2	12	regulation of glucan biosynthetic process
GO:1901264	2.46e-02	6	112	carbohydrate derivative transport
GO:0007165	2.57e-02	36	1295	signal transduction
GO:0023052	2.70e-02	36	1300	signaling
GO:0051123	2.75e-02	3	33	RNA polymerase II preinitiation complex assembly
GO:0065004	2.79e-02	7	147	protein-DNA complex assembly
GO:1901700	2.86e-02	22	714	response to oxygen-containing compound
GO:0006275	2.99e-02	4	59	regulation of DNA replication
GO:0016126	2.99e-02	4	59	sterol biosynthetic process
GO:0030243	3.07e-02	6	118	cellulose metabolic process
GO:0034599	3.15e-02	4	60	cellular response to oxidative stress
GO:0007154	3.20e-02	36	1317	cell communication
GO:0008610	3.20e-02	20	641	lipid biosynthetic process
GO:0032365	3.50e-02	2	15	intracellular lipid transport
GO:0044211	3.50e-02	2	15	CTP salvage
GO:1902025	3.50e-02	2	15	nitrate import
GO:0015706	3.50e-02	2	15	nitrate transmembrane transport
GO:0051131	3.50e-02	2	15	chaperone-mediated protein complex assembly
GO:0006491	3.50e-02	2	15	N-glycan processing
GO:0071824	3.57e-02	7	155	protein-DNA complex organization
GO:0050776	3.95e-02	2	16	regulation of immune response
GO:0006734	3.95e-02	2	16	NADH metabolic process
GO:0002682	3.95e-02	2	16	regulation of immune system process
GO:0006598	3.95e-02	2	16	polyamine catabolic process
GO:0044206	3.95e-02	2	16	UMP salvage
GO:0006627	3.95e-02	2	16	protein processing involved in protein targeting to mitochondrion
GO:0009310	3.95e-02	2	16	amine catabolic process
GO:0015850	3.95e-02	2	16	organic hydroxy compound transport
GO:0042402	3.95e-02	2	16	cellular biogenic amine catabolic process
GO:0045088	3.95e-02	2	16	regulation of innate immune response
GO:0045839	4.22e-02	3	39	negative regulation of mitotic nuclear division
GO:0007008	4.42e-02	2	17	outer mitochondrial membrane organization
GO:0045040	4.42e-02	2	17	protein insertion into mitochondrial outer membrane
GO:0007166	4.63e-02	10	272	cell surface receptor signaling pathway
GO:0006605	4.93e-02	9	238	protein targeting
GO:0009725	4.95e-02	20	674	response to hormone
GO:0009719	4.95e-02	20	674	response to endogenous stimulus

## Sheet: GO dicots
GO id	P-value	x	n	GO term
GO:0050794	3.29e-07	384	3735	regulation of cellular process
GO:0050789	5.04e-07	425	4214	regulation of biological process
GO:2001141	3.20e-06	184	1620	regulation of RNA biosynthetic process
GO:0006355	3.20e-06	184	1620	regulation of DNA-templated transcription
GO:1990937	3.89e-06	5	5	xylan acetylation
GO:0065007	5.73e-06	454	4638	biological regulation
GO:0080090	9.07e-06	270	2576	regulation of primary metabolic process
GO:0051252	2.30e-05	203	1876	regulation of RNA metabolic process
GO:0016119	3.31e-05	9	22	carotene metabolic process
GO:0006888	3.61e-05	27	142	endoplasmic reticulum to Golgi vesicle-mediated transport
GO:1901175	4.70e-05	4	4	lycopene metabolic process
GO:1901177	4.70e-05	4	4	lycopene biosynthetic process
GO:0042989	4.70e-05	4	4	sequestering of actin monomers
GO:0052889	4.70e-05	4	4	9,9'-di-cis-zeta-carotene desaturation to 7,9,7',9'-tetra-cis-lycopene
GO:0019219	5.35e-05	209	1967	regulation of nucleobase-containing compound metabolic process
GO:0046686	5.85e-05	31	178	response to cadmium ion
GO:0019222	6.76e-05	284	2802	regulation of metabolic process
GO:0060255	6.87e-05	274	2691	regulation of macromolecule metabolic process
GO:0009734	7.56e-05	29	164	auxin-activated signaling pathway
GO:0042546	8.89e-05	34	207	cell wall biogenesis
GO:0006556	9.38e-05	7	15	S-adenosylmethionine biosynthetic process
GO:0071365	1.31e-04	29	169	cellular response to auxin stimulus
GO:0009888	1.51e-04	40	265	tissue development
GO:0016120	1.91e-04	6	12	carotene biosynthetic process
GO:0006351	2.39e-04	188	1788	DNA-templated transcription
GO:0009832	2.47e-04	25	142	plant-type cell wall biogenesis
GO:0090376	2.89e-04	17	81	seed trichome differentiation
GO:0048280	3.30e-04	6	13	vesicle fusion with Golgi apparatus
GO:0031323	3.39e-04	244	2418	regulation of cellular metabolic process
GO:0051273	3.56e-04	23	129	beta-glucan metabolic process
GO:0007165	3.64e-04	141	1295	signal transduction
GO:0006896	3.72e-04	7	18	Golgi to vacuole transport
GO:0009749	3.91e-04	9	29	response to glucose
GO:0023052	4.30e-04	141	1300	signaling
GO:0006891	5.13e-04	12	49	intra-Golgi vesicle-mediated transport
GO:0009746	5.18e-04	9	30	response to hexose
GO:0034284	5.18e-04	9	30	response to monosaccharide
GO:0007154	5.28e-04	142	1317	cell communication
GO:0010185	5.68e-04	3	3	regulation of cellular defense response
GO:0010248	5.68e-04	3	3	establishment or maintenance of transmembrane electrochemical gradient
GO:0051245	5.68e-04	3	3	negative regulation of cellular defense response
GO:0070861	6.15e-04	4	6	regulation of protein exit from endoplasmic reticulum
GO:0070863	6.15e-04	4	6	positive regulation of protein exit from endoplasmic reticulum
GO:2000280	6.15e-04	4	6	regulation of root development
GO:0010038	6.73e-04	34	230	response to metal ion
GO:0045491	7.01e-04	15	72	xylan metabolic process
GO:0000271	7.26e-04	35	240	polysaccharide biosynthetic process
GO:0045492	7.59e-04	13	58	xylan biosynthetic process
GO:0120251	8.73e-04	9	32	hydrocarbon biosynthetic process
GO:0010383	9.07e-04	24	146	cell wall polysaccharide metabolic process
GO:0022412	9.09e-04	17	89	cellular process involved in reproduction in multicellular organism
GO:0010410	9.25e-04	20	113	hemicellulose metabolic process
GO:0051274	9.28e-04	18	97	beta-glucan biosynthetic process
GO:0071669	9.31e-04	27	172	plant-type cell wall organization or biogenesis
GO:0010026	1.18e-03	17	91	trichome differentiation
GO:0010051	1.24e-03	6	16	xylem and phloem pattern formation
GO:0099402	1.36e-03	42	314	plant organ development
GO:0048367	1.44e-03	40	296	shoot system development
GO:0044085	1.48e-03	173	1689	cellular component biogenesis
GO:0044036	1.65e-03	25	161	cell wall macromolecule metabolic process
GO:0032482	1.71e-03	13	63	Rab protein signal transduction
GO:0031399	1.77e-03	34	243	regulation of protein modification process
GO:0009733	1.81e-03	36	262	response to auxin
GO:0048511	1.83e-03	14	71	rhythmic process
GO:0007623	1.83e-03	14	71	circadian rhythm
GO:0009409	1.84e-03	19	111	response to cold
GO:0009755	1.85e-03	48	377	hormone-mediated signaling pathway
GO:0010497	1.87e-03	5	12	plasmodesmata-mediated intercellular transport
GO:0009834	1.92e-03	16	87	plant-type secondary cell wall biogenesis
GO:0042221	2.03e-03	146	1405	response to chemical
GO:0048366	2.05e-03	23	146	leaf development
GO:0170033	2.07e-03	159	1548	L-amino acid metabolic process
GO:0170039	2.07e-03	159	1548	proteinogenic amino acid metabolic process
GO:0010014	2.13e-03	3	4	meristem initiation
GO:0006968	2.13e-03	3	4	cellular defense response
GO:0009663	2.13e-03	3	4	plasmodesma organization
GO:0009651	2.26e-03	32	228	response to salt stress
GO:0048827	2.36e-03	27	183	phyllome development
GO:0046246	2.49e-03	6	18	terpene biosynthetic process
GO:1904481	2.51e-03	4	8	response to tetrahydrofolate
GO:1904482	2.51e-03	4	8	cellular response to tetrahydrofolate
GO:0070592	2.70e-03	17	98	cell wall polysaccharide biosynthetic process
GO:0010496	2.84e-03	5	13	intercellular transport
GO:0046500	3.36e-03	7	25	S-adenosylmethionine metabolic process
GO:1902904	3.39e-03	6	19	negative regulation of supramolecular fiber organization
GO:0051494	3.39e-03	6	19	negative regulation of cytoskeleton organization
GO:0051651	3.61e-03	11	53	maintenance of location in cell
GO:1901605	3.71e-03	164	1626	alpha-amino acid metabolic process
GO:0030243	3.76e-03	19	118	cellulose metabolic process
GO:0034765	3.78e-03	8	32	regulation of monoatomic ion transmembrane transport
GO:0042147	3.81e-03	10	46	retrograde transport, endosome to Golgi
GO:0009069	3.84e-03	107	1005	serine family amino acid metabolic process
GO:0032870	4.04e-03	48	392	cellular response to hormone stimulus
GO:0071495	4.04e-03	48	392	cellular response to endogenous stimulus
GO:0009903	4.12e-03	5	14	chloroplast avoidance movement
GO:0010556	4.15e-03	215	2201	regulation of macromolecule biosynthetic process
GO:0006565	4.22e-03	4	9	L-serine catabolic process
GO:0010305	4.22e-03	4	9	leaf vascular tissue pattern formation
GO:0090316	4.22e-03	4	9	positive regulation of intracellular protein transport
GO:0022613	4.35e-03	100	934	ribonucleoprotein complex biogenesis
GO:0009250	4.41e-03	22	146	glucan biosynthetic process
GO:0016482	4.49e-03	10	47	cytosolic transport
GO:0010468	4.57e-03	213	2183	regulation of gene expression
GO:1901600	5.00e-03	3	5	strigolactone metabolic process
GO:1901601	5.00e-03	3	5	strigolactone biosynthetic process
GO:0048193	5.01e-03	32	240	Golgi vesicle transport
GO:0090481	5.26e-03	10	48	pyrimidine nucleotide-sugar transmembrane transport
GO:0009825	5.36e-03	7	27	multidimensional cell growth
GO:0009889	5.37e-03	217	2236	regulation of biosynthetic process
GO:0048364	5.46e-03	19	122	root development
GO:0022622	5.46e-03	19	122	root system development
GO:0006623	5.55e-03	9	41	protein targeting to vacuole
GO:0043269	5.63e-03	8	34	regulation of monoatomic ion transport
GO:0030244	5.70e-03	14	80	cellulose biosynthetic process
GO:0009904	5.76e-03	5	15	chloroplast accumulation movement
GO:0006468	5.80e-03	140	1379	protein phosphorylation
GO:0010413	5.87e-03	6	21	glucuronoxylan metabolic process
GO:0010417	5.87e-03	6	21	glucuronoxylan biosynthetic process
GO:0031326	5.89e-03	215	2218	regulation of cellular biosynthetic process
GO:0071840	6.07e-03	274	2892	cellular component organization or biogenesis
GO:0006970	6.07e-03	35	272	response to osmotic stress
GO:0090558	6.11e-03	22	150	plant epidermis development
GO:1905392	6.38e-03	18	115	plant organ morphogenesis
GO:0032352	6.87e-03	2	2	positive regulation of hormone metabolic process
GO:0071588	6.87e-03	2	2	hydrogen peroxide mediated signaling pathway
GO:0045764	6.87e-03	2	2	positive regulation of amino acid metabolic process
GO:0006679	6.87e-03	2	2	glucosylceramide biosynthetic process
GO:0048262	6.87e-03	2	2	determination of dorsal/ventral asymmetry
GO:0048263	6.87e-03	2	2	determination of dorsal identity
GO:0080060	6.87e-03	2	2	integument development
GO:0098927	6.87e-03	2	2	vesicle-mediated transport between endosomal compartments
GO:0009662	6.87e-03	2	2	etioplast organization
GO:0005990	6.87e-03	2	2	lactose catabolic process
GO:0005988	6.87e-03	2	2	lactose metabolic process
GO:0034260	6.87e-03	2	2	negative regulation of GTPase activity
GO:0019236	6.87e-03	2	2	response to pheromone
GO:0090355	6.87e-03	2	2	positive regulation of auxin metabolic process
GO:0090357	6.87e-03	2	2	regulation of tryptophan metabolic process
GO:0090358	6.87e-03	2	2	positive regulation of tryptophan metabolic process
GO:0009953	6.87e-03	2	2	dorsal/ventral pattern formation
GO:0046476	6.87e-03	2	2	glycosylceramide biosynthetic process
GO:0033473	6.87e-03	2	2	indoleacetic acid conjugate metabolic process
GO:0045022	6.87e-03	2	2	early endosome to late endosome transport
GO:0033240	6.87e-03	2	2	positive regulation of amine metabolic process
GO:0051049	7.12e-03	14	82	regulation of transport
GO:0009725	7.41e-03	74	674	response to hormone
GO:0009719	7.41e-03	74	674	response to endogenous stimulus
GO:0097305	7.60e-03	35	276	response to alcohol
GO:0042214	8.20e-03	10	51	terpene metabolic process
GO:0045216	9.39e-03	3	6	cell-cell junction organization
GO:0015790	9.39e-03	3	6	UDP-xylose transmembrane transport
GO:0032388	9.65e-03	4	11	positive regulation of intracellular transport
GO:0072334	9.65e-03	4	11	UDP-galactose transmembrane transport
GO:1902182	9.65e-03	4	11	shoot apical meristem development
GO:0040007	1.01e-02	37	301	growth
GO:0042254	1.02e-02	88	833	ribosome biogenesis
GO:0016106	1.03e-02	5	17	sesquiterpenoid biosynthetic process
GO:0051050	1.03e-02	5	17	positive regulation of transport
GO:0005976	1.04e-02	69	631	polysaccharide metabolic process
GO:0032879	1.05e-02	16	103	regulation of localization
GO:0030154	1.06e-02	40	332	cell differentiation
GO:0046777	1.11e-02	22	158	protein autophosphorylation
GO:0009414	1.15e-02	20	140	response to water deprivation
GO:0001932	1.16e-02	23	168	regulation of protein phosphorylation
GO:0051235	1.22e-02	11	62	maintenance of location
GO:0048609	1.33e-02	23	170	multicellular organismal reproductive process
GO:0048207	1.35e-02	4	12	vesicle targeting, rough ER to cis-Golgi
GO:0048208	1.35e-02	4	12	COPII vesicle coating
GO:1904951	1.35e-02	4	12	positive regulation of establishment of protein localization
GO:0090379	1.35e-02	4	12	secondary cell wall biogenesis involved in seed trichome differentiation
GO:0033157	1.35e-02	4	12	regulation of intracellular protein transport
GO:0051222	1.35e-02	4	12	positive regulation of protein transport
GO:0006730	1.37e-02	11	63	one-carbon metabolic process
GO:0019748	1.38e-02	24	180	secondary metabolic process
GO:0007030	1.39e-02	10	55	Golgi organization
GO:0006520	1.39e-02	164	1685	amino acid metabolic process
GO:0042594	1.39e-02	13	80	response to starvation
GO:0048869	1.40e-02	40	338	cellular developmental process
GO:0071554	1.41e-02	51	451	cell wall organization or biogenesis
GO:0034314	1.44e-02	6	25	Arp2/3 complex-mediated actin nucleation
GO:0003002	1.54e-02	8	40	regionalization
GO:0006654	1.54e-02	3	7	phosphatidic acid biosynthetic process
GO:0072665	1.58e-02	9	48	protein localization to vacuole
GO:0072666	1.58e-02	9	48	establishment of protein localization to vacuole
GO:0007275	1.66e-02	101	992	multicellular organism development
GO:0009789	1.69e-02	5	19	positive regulation of abscisic acid-activated signaling pathway
GO:0048731	1.70e-02	76	721	system development
GO:0048856	1.72e-02	119	1192	anatomical structure development
GO:0009415	1.77e-02	20	146	response to water
GO:0006892	1.77e-02	8	41	post-Golgi vesicle-mediated transport
GO:0009737	1.81e-02	33	273	response to abscisic acid
GO:0016051	1.82e-02	54	489	carbohydrate biosynthetic process
GO:0010075	1.83e-02	4	13	regulation of meristem growth
GO:0007142	1.83e-02	4	13	male meiosis II
GO:0007135	1.83e-02	4	13	meiosis II
GO:0061983	1.83e-02	4	13	meiosis II cell cycle process
GO:0062013	1.83e-02	4	13	positive regulation of small molecule metabolic process
GO:0007264	1.88e-02	17	119	small GTPase-mediated signal transduction
GO:0045472	1.95e-02	2	3	response to ether
GO:1902932	1.95e-02	2	3	positive regulation of alcohol biosynthetic process
GO:0050687	1.95e-02	2	3	negative regulation of defense response to virus
GO:0050688	1.95e-02	2	3	regulation of defense response to virus
GO:0000461	1.95e-02	2	3	endonucleolytic cleavage to generate mature 3'-end of SSU-rRNA from (SSU-rRNA, 5.8S rRNA, LSU-rRNA)
GO:0009068	1.95e-02	2	3	aspartate family amino acid catabolic process
GO:0006567	1.95e-02	2	3	threonine catabolic process
GO:1901654	1.95e-02	2	3	response to ketone
GO:0016241	1.95e-02	2	3	regulation of macroautophagy
GO:0016242	1.95e-02	2	3	negative regulation of macroautophagy
GO:0010116	1.95e-02	2	3	positive regulation of abscisic acid biosynthetic process
GO:0010244	1.95e-02	2	3	response to low fluence blue light stimulus by blue low-fluence system
GO:0009745	1.95e-02	2	3	sucrose mediated signaling
GO:2000234	1.95e-02	2	3	positive regulation of rRNA processing
GO:0040019	1.95e-02	2	3	positive regulation of embryonic development
GO:1901355	1.95e-02	2	3	response to rapamycin
GO:1902661	1.95e-02	2	3	positive regulation of glucose mediated signaling pathway
GO:0042325	1.95e-02	23	176	regulation of phosphorylation
GO:0009926	1.96e-02	7	34	auxin polar transport
GO:0010016	1.98e-02	10	58	shoot system morphogenesis
GO:0045185	2.04e-02	8	42	maintenance of protein location
GO:0032507	2.04e-02	8	42	maintenance of protein location in cell
GO:0044042	2.07e-02	58	535	glucan metabolic process
GO:0051667	2.09e-02	6	27	establishment of plastid localization
GO:1902903	2.09e-02	6	27	regulation of supramolecular fiber organization
GO:0051644	2.09e-02	6	27	plastid localization
GO:0019750	2.09e-02	6	27	chloroplast localization
GO:0009902	2.09e-02	6	27	chloroplast relocation
GO:0045010	2.09e-02	6	27	actin nucleation
GO:0006714	2.10e-02	5	20	sesquiterpenoid metabolic process
GO:0044087	2.19e-02	12	76	regulation of cellular component biogenesis
GO:0070129	2.32e-02	3	8	regulation of mitochondrial translation
GO:0070131	2.32e-02	3	8	positive regulation of mitochondrial translation
GO:0062125	2.32e-02	3	8	regulation of mitochondrial gene expression
GO:0034330	2.32e-02	3	8	cell junction organization
GO:0046473	2.32e-02	3	8	phosphatidic acid metabolic process
GO:0048589	2.32e-02	29	238	developmental growth
GO:0006901	2.40e-02	4	14	vesicle coating
GO:0032501	2.44e-02	108	1085	multicellular organismal process
GO:0015780	2.47e-02	10	60	nucleotide-sugar transmembrane transport
GO:0032502	2.49e-02	133	1365	developmental process
GO:0009914	2.58e-02	9	52	hormone transport
GO:0060918	2.58e-02	9	52	auxin transport
GO:0009698	2.62e-02	15	105	phenylpropanoid metabolic process
GO:0048507	2.84e-02	11	70	meristem development
GO:0034762	2.99e-02	8	45	regulation of transmembrane transport
GO:0023056	3.02e-02	7	37	positive regulation of signaling
GO:0009967	3.02e-02	7	37	positive regulation of signal transduction
GO:0007034	3.05e-02	15	107	vacuolar transport
GO:0052324	3.06e-02	4	15	plant-type cell wall cellulose biosynthetic process
GO:0034410	3.06e-02	4	15	cell wall beta-glucan biosynthetic process
GO:1903829	3.06e-02	4	15	positive regulation of protein localization
GO:0034406	3.06e-02	4	15	cell wall beta-glucan metabolic process
GO:0052541	3.06e-02	4	15	plant-type cell wall cellulose metabolic process
GO:0051223	3.06e-02	4	15	regulation of protein transport
GO:1905958	3.11e-02	5	22	negative regulation of cellular response to alcohol
GO:0009788	3.11e-02	5	22	negative regulation of abscisic acid-activated signaling pathway
GO:1901420	3.11e-02	5	22	negative regulation of response to alcohol
GO:0071805	3.14e-02	13	89	potassium ion transmembrane transport
GO:0016197	3.14e-02	13	89	endosomal transport
GO:0010015	3.14e-02	12	80	root morphogenesis
GO:0019220	3.27e-02	23	185	regulation of phosphate metabolic process
GO:0051174	3.27e-02	23	185	regulation of phosphorus metabolic process
GO:0010346	3.27e-02	3	9	shoot axis formation
GO:0010223	3.27e-02	3	9	secondary shoot formation
GO:0045948	3.27e-02	3	9	positive regulation of translational initiation
GO:0033356	3.27e-02	3	9	UDP-L-arabinose metabolic process
GO:0016049	3.27e-02	28	235	cell growth
GO:0035556	3.37e-02	59	561	intracellular signal transduction
GO:0010647	3.44e-02	7	38	positive regulation of cell communication
GO:1901700	3.48e-02	73	714	response to oxygen-containing compound
GO:0007389	3.57e-02	9	55	pattern specification process
GO:0006290	3.68e-02	2	4	pyrimidine dimer repair
GO:0032350	3.68e-02	2	4	regulation of hormone metabolic process
GO:0006521	3.68e-02	2	4	regulation of cellular amino acid metabolic process
GO:0006688	3.68e-02	2	4	glycosphingolipid biosynthetic process
GO:0009413	3.68e-02	2	4	response to flooding
GO:0031330	3.68e-02	2	4	negative regulation of cellular catabolic process
GO:0009831	3.68e-02	2	4	plant-type cell wall modification involved in multidimensional cell growth
GO:0009683	3.68e-02	2	4	indoleacetic acid metabolic process
GO:0010507	3.68e-02	2	4	negative regulation of autophagy
GO:0090354	3.68e-02	2	4	regulation of auxin metabolic process
GO:0051365	3.68e-02	2	4	cellular response to potassium ion starvation
GO:0010929	3.68e-02	2	4	positive regulation of auxin mediated signaling pathway
GO:0038202	3.68e-02	2	4	TORC1 signaling
GO:2000232	3.68e-02	2	4	regulation of rRNA processing
GO:1902659	3.68e-02	2	4	regulation of glucose mediated signaling pathway
GO:0033238	3.68e-02	2	4	regulation of amine metabolic process
GO:0098739	3.71e-02	5	23	import across plasma membrane
GO:0008064	3.71e-02	5	23	regulation of actin polymerization or depolymerization
GO:0030832	3.71e-02	5	23	regulation of actin filament length
GO:0090333	3.71e-02	5	23	regulation of stomatal closure
GO:0110053	3.71e-02	5	23	regulation of actin filament organization
GO:1901419	3.77e-02	8	47	regulation of response to alcohol
GO:1905957	3.77e-02	8	47	regulation of cellular response to alcohol
GO:0009787	3.77e-02	8	47	regulation of abscisic acid-activated signaling pathway
GO:0002181	3.77e-02	17	129	cytoplasmic translation
GO:0006813	3.78e-02	15	110	potassium ion transport
GO:0070201	3.82e-02	4	16	regulation of establishment of protein localization
GO:0032386	3.82e-02	4	16	regulation of intracellular transport
GO:0032272	3.82e-02	4	16	negative regulation of protein polymerization
GO:0031333	3.82e-02	4	16	negative regulation of protein-containing complex assembly
GO:0141067	3.82e-02	4	16	intracellular nitrogen homeostasis
GO:0009850	3.82e-02	4	16	auxin metabolic process
GO:0010506	3.82e-02	4	16	regulation of autophagy
GO:0030837	3.82e-02	4	16	negative regulation of actin filament polymerization
GO:0019740	3.82e-02	4	16	nitrogen utilization
GO:0006906	4.21e-02	8	48	vesicle fusion
GO:0006812	4.23e-02	64	623	monoatomic cation transport
GO:0120252	4.33e-02	15	112	hydrocarbon metabolic process
GO:0043455	4.38e-02	5	24	regulation of secondary metabolic process
GO:0009113	4.38e-02	5	24	purine nucleobase biosynthetic process
GO:0016121	4.38e-02	3	10	carotene catabolic process
GO:0001763	4.38e-02	3	10	morphogenesis of a branching structure
GO:0030030	4.38e-02	3	10	cell projection organization
GO:0030031	4.38e-02	3	10	cell projection assembly
GO:1905393	4.50e-02	6	32	plant organ formation
GO:0010087	4.50e-02	6	32	phloem or xylem histogenesis
GO:0010073	4.50e-02	6	32	meristem maintenance
GO:0035266	4.68e-02	4	17	meristem growth
GO:0010411	4.68e-02	8	49	xyloglucan metabolic process
GO:0033993	4.68e-02	43	400	response to lipid
GO:0036211	4.94e-02	243	2667	protein modification process
GO:0001101	4.94e-02	20	163	response to acid chemical

## Sheet: GO conifers
GO id	P-value	x	n	GO term
GO:0007165	1.37e-14	127	382	signal transduction
GO:0007154	1.37e-14	127	382	cell communication
GO:0023052	1.37e-14	127	382	signaling
GO:0050789	4.46e-12	219	832	regulation of biological process
GO:0050794	4.86e-12	217	823	regulation of cellular process
GO:0065007	8.89e-12	220	842	biological regulation
GO:0051716	4.69e-11	134	453	cellular response to stimulus
GO:0050896	3.69e-10	164	603	response to stimulus
GO:0006556	1.84e-04	6	7	S-adenosylmethionine biosynthetic process
GO:0046500	1.84e-04	6	7	S-adenosylmethionine metabolic process
GO:0005985	5.84e-04	9	16	sucrose metabolic process
GO:0009095	2.84e-03	9	19	aromatic amino acid family biosynthetic process, prephenate pathway
GO:1902223	2.84e-03	9	19	erythrose 4-phosphate/phosphoenolpyruvate family amino acid biosynthetic process
GO:0009094	3.21e-03	8	16	L-phenylalanine biosynthetic process
GO:1902600	4.36e-03	9	20	proton transmembrane transport
GO:0006979	4.42e-03	22	71	response to oxidative stress
GO:0006558	5.13e-03	8	17	L-phenylalanine metabolic process
GO:0055085	5.30e-03	97	432	transmembrane transport
GO:1902221	6.44e-03	9	21	erythrose 4-phosphate/phosphoenolpyruvate family amino acid metabolic process
GO:0006810	1.09e-02	136	645	transport
GO:0006886	1.62e-02	18	61	intracellular protein transport
GO:0046907	1.92e-02	24	89	intracellular transport
GO:0051234	1.93e-02	136	656	establishment of localization
GO:0006576	2.01e-02	5	10	biogenic amine metabolic process
GO:0006265	2.01e-02	5	10	DNA topological change
GO:0042401	2.20e-02	4	7	biogenic amine biosynthetic process
GO:0009309	2.20e-02	4	7	amine biosynthetic process
GO:0005984	2.30e-02	9	25	disaccharide metabolic process
GO:0051649	2.50e-02	24	91	establishment of localization in cell
GO:0051179	2.69e-02	136	663	localization
GO:0006298	3.15e-02	5	11	mismatch repair
GO:0006536	3.15e-02	2	2	glutamate metabolic process
GO:0006537	3.15e-02	2	2	glutamate biosynthetic process
GO:0009311	3.78e-02	9	27	oligosaccharide metabolic process
GO:0031326	3.95e-02	88	418	regulation of cellular biosynthetic process
GO:0010556	3.95e-02	88	418	regulation of macromolecule biosynthetic process
GO:0009889	3.95e-02	88	418	regulation of biosynthetic process
GO:0010468	3.95e-02	88	418	regulation of gene expression
GO:0006595	4.21e-02	3	5	polyamine metabolic process
GO:0006596	4.21e-02	3	5	polyamine biosynthetic process
GO:0031047	4.63e-02	5	12	regulatory ncRNA-mediated gene silencing
GO:0009308	4.95e-02	6	16	amine metabolic process
