# Supplementary material for: An evo-devo resource for wood: Comparative regulomics across dicot and conifer trees
Source: Research Square preprint supplement (doi:10.21203/rs.3.rs-7656402/v1), 2025-10-30
Supplement: Supplementary file 5 [file e4e3420c5bcd72c0fd20c866.xlsx]

## Sheet: Legend
Tab4
Conserved genes: genes from six-membered cliques where all edges have FDR < 0.1., i.e. genes conserved across all species.
Conserved genes unique: contains only unique cliques, meaning that each gene can only occur in one clique. Within each orthogroup, the clique with lowest mean clique sum (FDR) was selected.
Differentiated genes: genes from six-membered cliques where all clade-specific edges are significant (FDR < 0.1) and no more than three significant cross-clade edges are included.
VNDs: the most similar arabidopsis gene of aspen clique genes from orthogroup OG0000261 identified (PlantGenie and Arabdopsis.org)
Angio-specific genes: cliques from orthogroups containing only genes expressed in angiosperms.
Angio-specific genes unique: see Conserved genes unique.
Gymno-specific genes: cliques from orthogroups containing only genes expressed in gymnosperms.
Gymno-specific genes unique: Conserved genes unique
Each row is a clique, GO terms and IDs, A. thaliana orthologs and symbols, and P. trichocarpa orthologs are collapsed (sep = ; ).
Note that orthogroups OG0000000, OG0000001, OG0000007, and OG0000018, were removed prior to clique identification (in contrast to the co-expressologs).

## Sheet: Conserved genes
OrthoGroup	cliqueID	MeanCliqueSum	Asp	Birch	Cher	Nor	Scots	Lodge	GO_ID	GO_Term	Arab	Symbol	Name	Description	Poptri
OG0000039	OG0000039_43	0.00823683	Potra2n11c23311	Bpev01.c0030.g0036.m0001	FUN_025419-T1	PA_chr02_G001018	PS_chr02_G006060	PS_chr09_G038070	GO:0003677; GO:0005634; GO:0006355	DNA binding; nucleus; regulation of transcription, DNA	AT1G28310	NA	NA	Dof-type zinc finger DNA-binding family protein Dof-type zinc finger DNA-binding family protein	Potri.011G055600; Potri.011G054300; Potri.004G046600; Potri.004G046100
OG0000039	OG0000039_44	0.00558333	Potra2n11c23311	Bpev01.c0896.g0007.m0001	FUN_025419-T1	PA_chr02_G001018	PS_chr02_G006060	PS_chr09_G038070	GO:0003677; GO:0005634; GO:0006355	DNA binding; nucleus; regulation of transcription, DNA	AT1G28310	NA	NA	Dof-type zinc finger DNA-binding family protein Dof-type zinc finger DNA-binding family protein	Potri.011G055600; Potri.011G054300; Potri.004G046600; Potri.004G046100
OG0000039	OG0000039_45	0.00135055	Potra2n11c23311	Bpev01.c0188.g0017.m0001	FUN_025419-T1	PA_chr02_G001018	PS_chr02_G006060	PS_chr09_G038070	GO:0003677; GO:0005634; GO:0006355	DNA binding; nucleus; regulation of transcription, DNA	AT1G28310	NA	NA	Dof-type zinc finger DNA-binding family protein Dof-type zinc finger DNA-binding family protein	Potri.011G055600; Potri.011G054300; Potri.004G046600; Potri.004G046100
OG0000039	OG0000039_46	0.01595	Potra2n11c23311	Bpev01.c0155.g0052.m0001	FUN_025419-T1	PA_chr02_G001018	PS_chr02_G006060	PS_chr09_G038070	GO:0003677; GO:0005634; GO:0006355	DNA binding; nucleus; regulation of transcription, DNA	AT1G28310	NA	NA	Dof-type zinc finger DNA-binding family protein Dof-type zinc finger DNA-binding family protein	Potri.011G055600; Potri.011G054300; Potri.004G046600; Potri.004G046100
OG0000039	OG0000039_47	0.0109983	Potra2n11c23311	Bpev01.c0030.g0036.m0001	FUN_025419-T1	PA_chr02_G001018	PS_chr09_G038070	PS_chr09_G038070	GO:0003677; GO:0005634; GO:0006355	DNA binding; nucleus; regulation of transcription, DNA	AT1G28310	NA	NA	Dof-type zinc finger DNA-binding family protein Dof-type zinc finger DNA-binding family protein	Potri.011G055600; Potri.011G054300; Potri.004G046600; Potri.004G046100
OG0000039	OG0000039_48	0.00519575	Potra2n11c23311	Bpev01.c0896.g0007.m0001	FUN_025419-T1	PA_chr02_G001018	PS_chr09_G038070	PS_chr09_G038070	GO:0003677; GO:0005634; GO:0006355	DNA binding; nucleus; regulation of transcription, DNA	AT1G28310	NA	NA	Dof-type zinc finger DNA-binding family protein Dof-type zinc finger DNA-binding family protein	Potri.011G055600; Potri.011G054300; Potri.004G046600; Potri.004G046100
OG0000039	OG0000039_49	0.0111985	Potra2n11c23311	Bpev01.c0188.g0017.m0001	FUN_025419-T1	PA_chr02_G001018	PS_chr09_G038070	PS_chr09_G038070	GO:0003677; GO:0005634; GO:0006355	DNA binding; nucleus; regulation of transcription, DNA	AT1G28310	NA	NA	Dof-type zinc finger DNA-binding family protein Dof-type zinc finger DNA-binding family protein	Potri.011G055600; Potri.011G054300; Potri.004G046600; Potri.004G046100
OG0000039	OG0000039_50	0.00702948	Potra2n11c23311	Bpev01.c0155.g0052.m0001	FUN_025419-T1	PA_chr02_G001018	PS_chr09_G038070	PS_chr09_G038070	GO:0003677; GO:0005634; GO:0006355	DNA binding; nucleus; regulation of transcription, DNA	AT1G28310	NA	NA	Dof-type zinc finger DNA-binding family protein Dof-type zinc finger DNA-binding family protein	Potri.011G055600; Potri.011G054300; Potri.004G046600; Potri.004G046100
OG0000039	OG0000039_52	0.00453684	Potra2n11c23311	Bpev01.c0030.g0036.m0001	FUN_026351-T1	PA_chr02_G001018	PS_chr02_G006060	PS_chr09_G038070	GO:0003677; GO:0005634; GO:0006355	DNA binding; nucleus; regulation of transcription, DNA	AT1G28310	NA	NA	Dof-type zinc finger DNA-binding family protein Dof-type zinc finger DNA-binding family protein	Potri.011G055600; Potri.011G054300; Potri.004G046600; Potri.004G046100
OG0000039	OG0000039_53	0.00816667	Potra2n11c23311	Bpev01.c0896.g0007.m0001	FUN_026351-T1	PA_chr02_G001018	PS_chr02_G006060	PS_chr09_G038070	GO:0003677; GO:0005634; GO:0006355	DNA binding; nucleus; regulation of transcription, DNA	AT1G28310	NA	NA	Dof-type zinc finger DNA-binding family protein Dof-type zinc finger DNA-binding family protein	Potri.011G055600; Potri.011G054300; Potri.004G046600; Potri.004G046100
OG0000039	OG0000039_54	0.00135913	Potra2n11c23311	Bpev01.c0188.g0017.m0001	FUN_026351-T1	PA_chr02_G001018	PS_chr02_G006060	PS_chr09_G038070	GO:0003677; GO:0005634; GO:0006355	DNA binding; nucleus; regulation of transcription, DNA	AT1G28310	NA	NA	Dof-type zinc finger DNA-binding family protein Dof-type zinc finger DNA-binding family protein	Potri.011G055600; Potri.011G054300; Potri.004G046600; Potri.004G046100
OG0000039	OG0000039_55	0.0181667	Potra2n11c23311	Bpev01.c0155.g0052.m0001	FUN_026351-T1	PA_chr02_G001018	PS_chr02_G006060	PS_chr09_G038070	GO:0003677; GO:0005634; GO:0006355	DNA binding; nucleus; regulation of transcription, DNA	AT1G28310	NA	NA	Dof-type zinc finger DNA-binding family protein Dof-type zinc finger DNA-binding family protein	Potri.011G055600; Potri.011G054300; Potri.004G046600; Potri.004G046100
OG0000039	OG0000039_56	0.00729836	Potra2n11c23311	Bpev01.c0030.g0036.m0001	FUN_026351-T1	PA_chr02_G001018	PS_chr09_G038070	PS_chr09_G038070	GO:0003677; GO:0005634; GO:0006355	DNA binding; nucleus; regulation of transcription, DNA	AT1G28310	NA	NA	Dof-type zinc finger DNA-binding family protein Dof-type zinc finger DNA-binding family protein	Potri.011G055600; Potri.011G054300; Potri.004G046600; Potri.004G046100
OG0000039	OG0000039_57	0.0077791	Potra2n11c23311	Bpev01.c0896.g0007.m0001	FUN_026351-T1	PA_chr02_G001018	PS_chr09_G038070	PS_chr09_G038070	GO:0003677; GO:0005634; GO:0006355	DNA binding; nucleus; regulation of transcription, DNA	AT1G28310	NA	NA	Dof-type zinc finger DNA-binding family protein Dof-type zinc finger DNA-binding family protein	Potri.011G055600; Potri.011G054300; Potri.004G046600; Potri.004G046100
OG0000039	OG0000039_58	0.0112071	Potra2n11c23311	Bpev01.c0188.g0017.m0001	FUN_026351-T1	PA_chr02_G001018	PS_chr09_G038070	PS_chr09_G038070	GO:0003677; GO:0005634; GO:0006355	DNA binding; nucleus; regulation of transcription, DNA	AT1G28310	NA	NA	Dof-type zinc finger DNA-binding family protein Dof-type zinc finger DNA-binding family protein	Potri.011G055600; Potri.011G054300; Potri.004G046600; Potri.004G046100
OG0000039	OG0000039_59	0.00924615	Potra2n11c23311	Bpev01.c0155.g0052.m0001	FUN_026351-T1	PA_chr02_G001018	PS_chr09_G038070	PS_chr09_G038070	GO:0003677; GO:0005634; GO:0006355	DNA binding; nucleus; regulation of transcription, DNA	AT1G28310	NA	NA	Dof-type zinc finger DNA-binding family protein Dof-type zinc finger DNA-binding family protein	Potri.011G055600; Potri.011G054300; Potri.004G046600; Potri.004G046100
OG0000039	OG0000039_61	0.0106663	Potra2n11c23311	Bpev01.c0030.g0036.m0001	FUN_031978-T1	PA_chr02_G001018	PS_chr02_G006060	PS_chr09_G038070	GO:0003677; GO:0005634; GO:0006355	DNA binding; nucleus; regulation of transcription, DNA	AT1G28310	NA	NA	Dof-type zinc finger DNA-binding family protein Dof-type zinc finger DNA-binding family protein	Potri.011G055600; Potri.011G054300; Potri.004G046600; Potri.004G046100
OG0000039	OG0000039_62	0.00467368	Potra2n11c23311	Bpev01.c0896.g0007.m0001	FUN_031978-T1	PA_chr02_G001018	PS_chr02_G006060	PS_chr09_G038070	GO:0003677; GO:0005634; GO:0006355	DNA binding; nucleus; regulation of transcription, DNA	AT1G28310	NA	NA	Dof-type zinc finger DNA-binding family protein Dof-type zinc finger DNA-binding family protein	Potri.011G055600; Potri.011G054300; Potri.004G046600; Potri.004G046100
OG0000039	OG0000039_63	0.00136338	Potra2n11c23311	Bpev01.c0188.g0017.m0001	FUN_031978-T1	PA_chr02_G001018	PS_chr02_G006060	PS_chr09_G038070	GO:0003677; GO:0005634; GO:0006355	DNA binding; nucleus; regulation of transcription, DNA	AT1G28310	NA	NA	Dof-type zinc finger DNA-binding family protein Dof-type zinc finger DNA-binding family protein	Potri.011G055600; Potri.011G054300; Potri.004G046600; Potri.004G046100
OG0000039	OG0000039_64	0.0139813	Potra2n11c23311	Bpev01.c0155.g0052.m0001	FUN_031978-T1	PA_chr02_G001018	PS_chr02_G006060	PS_chr09_G038070	GO:0003677; GO:0005634; GO:0006355	DNA binding; nucleus; regulation of transcription, DNA	AT1G28310	NA	NA	Dof-type zinc finger DNA-binding family protein Dof-type zinc finger DNA-binding family protein	Potri.011G055600; Potri.011G054300; Potri.004G046600; Potri.004G046100
OG0000039	OG0000039_67	0.0112113	Potra2n11c23311	Bpev01.c0188.g0017.m0001	FUN_031978-T1	PA_chr02_G001018	PS_chr09_G038070	PS_chr09_G038070	GO:0003677; GO:0005634; GO:0006355	DNA binding; nucleus; regulation of transcription, DNA	AT1G28310	NA	NA	Dof-type zinc finger DNA-binding family protein Dof-type zinc finger DNA-binding family protein	Potri.011G055600; Potri.011G054300; Potri.004G046600; Potri.004G046100
OG0000039	OG0000039_68	0.00506073	Potra2n11c23311	Bpev01.c0155.g0052.m0001	FUN_031978-T1	PA_chr02_G001018	PS_chr09_G038070	PS_chr09_G038070	GO:0003677; GO:0005634; GO:0006355	DNA binding; nucleus; regulation of transcription, DNA	AT1G28310	NA	NA	Dof-type zinc finger DNA-binding family protein Dof-type zinc finger DNA-binding family protein	Potri.011G055600; Potri.011G054300; Potri.004G046600; Potri.004G046100
OG0000039	OG0000039_70	0.00799063	Potra2n11c23311	Bpev01.c0030.g0036.m0001	FUN_025419-T1	PA_chr02_G001018	PS_chr02_G006060	PS_chr02_G006060	GO:0003677; GO:0005634; GO:0006355	DNA binding; nucleus; regulation of transcription, DNA	AT1G28310	NA	NA	Dof-type zinc finger DNA-binding family protein Dof-type zinc finger DNA-binding family protein	Potri.011G055600; Potri.011G054300; Potri.004G046600; Potri.004G046100
OG0000039	OG0000039_71	0.00533713	Potra2n11c23311	Bpev01.c0896.g0007.m0001	FUN_025419-T1	PA_chr02_G001018	PS_chr02_G006060	PS_chr02_G006060	GO:0003677; GO:0005634; GO:0006355	DNA binding; nucleus; regulation of transcription, DNA	AT1G28310	NA	NA	Dof-type zinc finger DNA-binding family protein Dof-type zinc finger DNA-binding family protein	Potri.011G055600; Potri.011G054300; Potri.004G046600; Potri.004G046100
OG0000039	OG0000039_72	0.00110435	Potra2n11c23311	Bpev01.c0188.g0017.m0001	FUN_025419-T1	PA_chr02_G001018	PS_chr02_G006060	PS_chr02_G006060	GO:0003677; GO:0005634; GO:0006355	DNA binding; nucleus; regulation of transcription, DNA	AT1G28310	NA	NA	Dof-type zinc finger DNA-binding family protein Dof-type zinc finger DNA-binding family protein	Potri.011G055600; Potri.011G054300; Potri.004G046600; Potri.004G046100
OG0000039	OG0000039_73	0.0157038	Potra2n11c23311	Bpev01.c0155.g0052.m0001	FUN_025419-T1	PA_chr02_G001018	PS_chr02_G006060	PS_chr02_G006060	GO:0003677; GO:0005634; GO:0006355	DNA binding; nucleus; regulation of transcription, DNA	AT1G28310	NA	NA	Dof-type zinc finger DNA-binding family protein Dof-type zinc finger DNA-binding family protein	Potri.011G055600; Potri.011G054300; Potri.004G046600; Potri.004G046100
OG0000039	OG0000039_76	0.0109523	Potra2n11c23311	Bpev01.c0188.g0017.m0001	FUN_025419-T1	PA_chr02_G001018	PS_chr09_G038070	PS_chr02_G006060	GO:0003677; GO:0005634; GO:0006355	DNA binding; nucleus; regulation of transcription, DNA	AT1G28310	NA	NA	Dof-type zinc finger DNA-binding family protein Dof-type zinc finger DNA-binding family protein	Potri.011G055600; Potri.011G054300; Potri.004G046600; Potri.004G046100
OG0000039	OG0000039_77	0.00678328	Potra2n11c23311	Bpev01.c0155.g0052.m0001	FUN_025419-T1	PA_chr02_G001018	PS_chr09_G038070	PS_chr02_G006060	GO:0003677; GO:0005634; GO:0006355	DNA binding; nucleus; regulation of transcription, DNA	AT1G28310	NA	NA	Dof-type zinc finger DNA-binding family protein Dof-type zinc finger DNA-binding family protein	Potri.011G055600; Potri.011G054300; Potri.004G046600; Potri.004G046100
OG0000039	OG0000039_79	0.00429076	Potra2n11c23311	Bpev01.c0030.g0036.m0001	FUN_026351-T1	PA_chr02_G001018	PS_chr02_G006060	PS_chr02_G006060	GO:0003677; GO:0005634; GO:0006355	DNA binding; nucleus; regulation of transcription, DNA	AT1G28310	NA	NA	Dof-type zinc finger DNA-binding family protein Dof-type zinc finger DNA-binding family protein	Potri.011G055600; Potri.011G054300; Potri.004G046600; Potri.004G046100
OG0000039	OG0000039_80	0.0079206	Potra2n11c23311	Bpev01.c0896.g0007.m0001	FUN_026351-T1	PA_chr02_G001018	PS_chr02_G006060	PS_chr02_G006060	GO:0003677; GO:0005634; GO:0006355	DNA binding; nucleus; regulation of transcription, DNA	AT1G28310	NA	NA	Dof-type zinc finger DNA-binding family protein Dof-type zinc finger DNA-binding family protein	Potri.011G055600; Potri.011G054300; Potri.004G046600; Potri.004G046100
OG0000039	OG0000039_81	0.00111305	Potra2n11c23311	Bpev01.c0188.g0017.m0001	FUN_026351-T1	PA_chr02_G001018	PS_chr02_G006060	PS_chr02_G006060	GO:0003677; GO:0005634; GO:0006355	DNA binding; nucleus; regulation of transcription, DNA	AT1G28310	NA	NA	Dof-type zinc finger DNA-binding family protein Dof-type zinc finger DNA-binding family protein	Potri.011G055600; Potri.011G054300; Potri.004G046600; Potri.004G046100
OG0000039	OG0000039_82	0.0179206	Potra2n11c23311	Bpev01.c0155.g0052.m0001	FUN_026351-T1	PA_chr02_G001018	PS_chr02_G006060	PS_chr02_G006060	GO:0003677; GO:0005634; GO:0006355	DNA binding; nucleus; regulation of transcription, DNA	AT1G28310	NA	NA	Dof-type zinc finger DNA-binding family protein Dof-type zinc finger DNA-binding family protein	Potri.011G055600; Potri.011G054300; Potri.004G046600; Potri.004G046100
OG0000039	OG0000039_83	0.00705228	Potra2n11c23311	Bpev01.c0030.g0036.m0001	FUN_026351-T1	PA_chr02_G001018	PS_chr09_G038070	PS_chr02_G006060	GO:0003677; GO:0005634; GO:0006355	DNA binding; nucleus; regulation of transcription, DNA	AT1G28310	NA	NA	Dof-type zinc finger DNA-binding family protein Dof-type zinc finger DNA-binding family protein	Potri.011G055600; Potri.011G054300; Potri.004G046600; Potri.004G046100
OG0000039	OG0000039_84	0.00753302	Potra2n11c23311	Bpev01.c0896.g0007.m0001	FUN_026351-T1	PA_chr02_G001018	PS_chr09_G038070	PS_chr02_G006060	GO:0003677; GO:0005634; GO:0006355	DNA binding; nucleus; regulation of transcription, DNA	AT1G28310	NA	NA	Dof-type zinc finger DNA-binding family protein Dof-type zinc finger DNA-binding family protein	Potri.011G055600; Potri.011G054300; Potri.004G046600; Potri.004G046100
OG0000039	OG0000039_85	0.010961	Potra2n11c23311	Bpev01.c0188.g0017.m0001	FUN_026351-T1	PA_chr02_G001018	PS_chr09_G038070	PS_chr02_G006060	GO:0003677; GO:0005634; GO:0006355	DNA binding; nucleus; regulation of transcription, DNA	AT1G28310	NA	NA	Dof-type zinc finger DNA-binding family protein Dof-type zinc finger DNA-binding family protein	Potri.011G055600; Potri.011G054300; Potri.004G046600; Potri.004G046100
OG0000039	OG0000039_86	0.00900008	Potra2n11c23311	Bpev01.c0155.g0052.m0001	FUN_026351-T1	PA_chr02_G001018	PS_chr09_G038070	PS_chr02_G006060	GO:0003677; GO:0005634; GO:0006355	DNA binding; nucleus; regulation of transcription, DNA	AT1G28310	NA	NA	Dof-type zinc finger DNA-binding family protein Dof-type zinc finger DNA-binding family protein	Potri.011G055600; Potri.011G054300; Potri.004G046600; Potri.004G046100
OG0000039	OG0000039_88	0.0104583	Potra2n11c23311	Bpev01.c0030.g0036.m0001	FUN_031978-T1	PA_chr02_G001018	PS_chr02_G006060	PS_chr02_G006060	GO:0003677; GO:0005634; GO:0006355	DNA binding; nucleus; regulation of transcription, DNA	AT1G28310	NA	NA	Dof-type zinc finger DNA-binding family protein Dof-type zinc finger DNA-binding family protein	Potri.011G055600; Potri.011G054300; Potri.004G046600; Potri.004G046100
OG0000039	OG0000039_89	0.00446563	Potra2n11c23311	Bpev01.c0896.g0007.m0001	FUN_031978-T1	PA_chr02_G001018	PS_chr02_G006060	PS_chr02_G006060	GO:0003677; GO:0005634; GO:0006355	DNA binding; nucleus; regulation of transcription, DNA	AT1G28310	NA	NA	Dof-type zinc finger DNA-binding family protein Dof-type zinc finger DNA-binding family protein	Potri.011G055600; Potri.011G054300; Potri.004G046600; Potri.004G046100
OG0000039	OG0000039_90	0.00115533	Potra2n11c23311	Bpev01.c0188.g0017.m0001	FUN_031978-T1	PA_chr02_G001018	PS_chr02_G006060	PS_chr02_G006060	GO:0003677; GO:0005634; GO:0006355	DNA binding; nucleus; regulation of transcription, DNA	AT1G28310	NA	NA	Dof-type zinc finger DNA-binding family protein Dof-type zinc finger DNA-binding family protein	Potri.011G055600; Potri.011G054300; Potri.004G046600; Potri.004G046100
OG0000039	OG0000039_91	0.0137732	Potra2n11c23311	Bpev01.c0155.g0052.m0001	FUN_031978-T1	PA_chr02_G001018	PS_chr02_G006060	PS_chr02_G006060	GO:0003677; GO:0005634; GO:0006355	DNA binding; nucleus; regulation of transcription, DNA	AT1G28310	NA	NA	Dof-type zinc finger DNA-binding family protein Dof-type zinc finger DNA-binding family protein	Potri.011G055600; Potri.011G054300; Potri.004G046600; Potri.004G046100
OG0000039	OG0000039_95	0.00485268	Potra2n11c23311	Bpev01.c0155.g0052.m0001	FUN_031978-T1	PA_chr02_G001018	PS_chr09_G038070	PS_chr02_G006060	GO:0003677; GO:0005634; GO:0006355	DNA binding; nucleus; regulation of transcription, DNA	AT1G28310	NA	NA	Dof-type zinc finger DNA-binding family protein Dof-type zinc finger DNA-binding family protein	Potri.011G055600; Potri.011G054300; Potri.004G046600; Potri.004G046100
OG0000039	OG0000039_97	0.0076673	Potra2n11c23311	Bpev01.c0030.g0036.m0001	FUN_025419-T1	PA_chr09_G001556	PS_chr02_G006060	PS_chr02_G006060	GO:0003677; GO:0005634; GO:0006355	DNA binding; nucleus; regulation of transcription, DNA	AT1G28310	NA	NA	Dof-type zinc finger DNA-binding family protein Dof-type zinc finger DNA-binding family protein	Potri.011G055600; Potri.011G054300; Potri.004G046600; Potri.004G046100
OG0000039	OG0000039_98	0.00396743	Potra2n11c23311	Bpev01.c0030.g0036.m0001	FUN_026351-T1	PA_chr09_G001556	PS_chr02_G006060	PS_chr02_G006060	GO:0003677; GO:0005634; GO:0006355	DNA binding; nucleus; regulation of transcription, DNA	AT1G28310	NA	NA	Dof-type zinc finger DNA-binding family protein Dof-type zinc finger DNA-binding family protein	Potri.011G055600; Potri.011G054300; Potri.004G046600; Potri.004G046100
OG0000039	OG0000039_99	0.010135	Potra2n11c23311	Bpev01.c0030.g0036.m0001	FUN_031978-T1	PA_chr09_G001556	PS_chr02_G006060	PS_chr02_G006060	GO:0003677; GO:0005634; GO:0006355	DNA binding; nucleus; regulation of transcription, DNA	AT1G28310	NA	NA	Dof-type zinc finger DNA-binding family protein Dof-type zinc finger DNA-binding family protein	Potri.011G055600; Potri.011G054300; Potri.004G046600; Potri.004G046100
OG0000039	OG0000039_100	0.0148673	Potra2n11c23311	Bpev01.c0030.g0036.m0001	FUN_021863-T1	PA_chr09_G001556	PS_chr02_G006060	PS_chr02_G006060	GO:0003677; GO:0005634; GO:0006355	DNA binding; nucleus; regulation of transcription, DNA	AT1G28310	NA	NA	Dof-type zinc finger DNA-binding family protein Dof-type zinc finger DNA-binding family protein	Potri.011G055600; Potri.011G054300; Potri.004G046600; Potri.004G046100
OG0000039	OG0000039_101	0.0008967	Potra2n11c23311	Bpev01.c0030.g0036.m0001	FUN_019322-T1	PA_chr09_G001556	PS_chr02_G006060	PS_chr02_G006060	GO:0003677; GO:0005634; GO:0006355	DNA binding; nucleus; regulation of transcription, DNA	AT1G28310	NA	NA	Dof-type zinc finger DNA-binding family protein Dof-type zinc finger DNA-binding family protein	Potri.011G055600; Potri.011G054300; Potri.004G046600; Potri.004G046100
OG0000039	OG0000039_102	0.0029173	Potra2n11c23311	Bpev01.c0030.g0036.m0001	FUN_032079-T1	PA_chr09_G001556	PS_chr02_G006060	PS_chr02_G006060	GO:0003677; GO:0005634; GO:0006355	DNA binding; nucleus; regulation of transcription, DNA	AT1G28310	NA	NA	Dof-type zinc finger DNA-binding family protein Dof-type zinc finger DNA-binding family protein	Potri.011G055600; Potri.011G054300; Potri.004G046600; Potri.004G046100
OG0000039	OG0000039_103	0.0050138	Potra2n11c23311	Bpev01.c0896.g0007.m0001	FUN_025419-T1	PA_chr09_G001556	PS_chr02_G006060	PS_chr02_G006060	GO:0003677; GO:0005634; GO:0006355	DNA binding; nucleus; regulation of transcription, DNA	AT1G28310	NA	NA	Dof-type zinc finger DNA-binding family protein Dof-type zinc finger DNA-binding family protein	Potri.011G055600; Potri.011G054300; Potri.004G046600; Potri.004G046100
OG0000039	OG0000039_104	0.00759726	Potra2n11c23311	Bpev01.c0896.g0007.m0001	FUN_026351-T1	PA_chr09_G001556	PS_chr02_G006060	PS_chr02_G006060	GO:0003677; GO:0005634; GO:0006355	DNA binding; nucleus; regulation of transcription, DNA	AT1G28310	NA	NA	Dof-type zinc finger DNA-binding family protein Dof-type zinc finger DNA-binding family protein	Potri.011G055600; Potri.011G054300; Potri.004G046600; Potri.004G046100
OG0000039	OG0000039_105	0.0041423	Potra2n11c23311	Bpev01.c0896.g0007.m0001	FUN_031978-T1	PA_chr09_G001556	PS_chr02_G006060	PS_chr02_G006060	GO:0003677; GO:0005634; GO:0006355	DNA binding; nucleus; regulation of transcription, DNA	AT1G28310	NA	NA	Dof-type zinc finger DNA-binding family protein Dof-type zinc finger DNA-binding family protein	Potri.011G055600; Potri.011G054300; Potri.004G046600; Potri.004G046100
OG0000039	OG0000039_106	0.0180305	Potra2n11c23311	Bpev01.c0896.g0007.m0001	FUN_021863-T1	PA_chr09_G001556	PS_chr02_G006060	PS_chr02_G006060	GO:0003677; GO:0005634; GO:0006355	DNA binding; nucleus; regulation of transcription, DNA	AT1G28310	NA	NA	Dof-type zinc finger DNA-binding family protein Dof-type zinc finger DNA-binding family protein	Potri.011G055600; Potri.011G054300; Potri.004G046600; Potri.004G046100
OG0000039	OG0000039_107	0.00405987	Potra2n11c23311	Bpev01.c0896.g0007.m0001	FUN_019322-T1	PA_chr09_G001556	PS_chr02_G006060	PS_chr02_G006060	GO:0003677; GO:0005634; GO:0006355	DNA binding; nucleus; regulation of transcription, DNA	AT1G28310	NA	NA	Dof-type zinc finger DNA-binding family protein Dof-type zinc finger DNA-binding family protein	Potri.011G055600; Potri.011G054300; Potri.004G046600; Potri.004G046100
OG0000039	OG0000039_108	0.00608047	Potra2n11c23311	Bpev01.c0896.g0007.m0001	FUN_032079-T1	PA_chr09_G001556	PS_chr02_G006060	PS_chr02_G006060	GO:0003677; GO:0005634; GO:0006355	DNA binding; nucleus; regulation of transcription, DNA	AT1G28310	NA	NA	Dof-type zinc finger DNA-binding family protein Dof-type zinc finger DNA-binding family protein	Potri.011G055600; Potri.011G054300; Potri.004G046600; Potri.004G046100
OG0000039	OG0000039_109	0.000781017	Potra2n11c23311	Bpev01.c0188.g0017.m0001	FUN_025419-T1	PA_chr09_G001556	PS_chr02_G006060	PS_chr02_G006060	GO:0003677; GO:0005634; GO:0006355	DNA binding; nucleus; regulation of transcription, DNA	AT1G28310	NA	NA	Dof-type zinc finger DNA-binding family protein Dof-type zinc finger DNA-binding family protein	Potri.011G055600; Potri.011G054300; Potri.004G046600; Potri.004G046100
OG0000039	OG0000039_110	0.00078972	Potra2n11c23311	Bpev01.c0188.g0017.m0001	FUN_026351-T1	PA_chr09_G001556	PS_chr02_G006060	PS_chr02_G006060	GO:0003677; GO:0005634; GO:0006355	DNA binding; nucleus; regulation of transcription, DNA	AT1G28310	NA	NA	Dof-type zinc finger DNA-binding family protein Dof-type zinc finger DNA-binding family protein	Potri.011G055600; Potri.011G054300; Potri.004G046600; Potri.004G046100
OG0000039	OG0000039_111	0.000832001	Potra2n11c23311	Bpev01.c0188.g0017.m0001	FUN_031978-T1	PA_chr09_G001556	PS_chr02_G006060	PS_chr02_G006060	GO:0003677; GO:0005634; GO:0006355	DNA binding; nucleus; regulation of transcription, DNA	AT1G28310	NA	NA	Dof-type zinc finger DNA-binding family protein Dof-type zinc finger DNA-binding family protein	Potri.011G055600; Potri.011G054300; Potri.004G046600; Potri.004G046100
OG0000039	OG0000039_112	0.00102199	Potra2n11c23311	Bpev01.c0188.g0017.m0001	FUN_019322-T1	PA_chr09_G001556	PS_chr02_G006060	PS_chr02_G006060	GO:0003677; GO:0005634; GO:0006355	DNA binding; nucleus; regulation of transcription, DNA	AT1G28310	NA	NA	Dof-type zinc finger DNA-binding family protein Dof-type zinc finger DNA-binding family protein	Potri.011G055600; Potri.011G054300; Potri.004G046600; Potri.004G046100
OG0000039	OG0000039_113	0.0147643	Potra2n11c23311	Bpev01.c0188.g0017.m0001	FUN_021863-T1	PA_chr09_G001556	PS_chr02_G006060	PS_chr02_G006060	GO:0003677; GO:0005634; GO:0006355	DNA binding; nucleus; regulation of transcription, DNA	AT1G28310	NA	NA	Dof-type zinc finger DNA-binding family protein Dof-type zinc finger DNA-binding family protein	Potri.011G055600; Potri.011G054300; Potri.004G046600; Potri.004G046100
OG0000039	OG0000039_114	0.00292592	Potra2n11c23311	Bpev01.c0188.g0017.m0001	FUN_032079-T1	PA_chr09_G001556	PS_chr02_G006060	PS_chr02_G006060	GO:0003677; GO:0005634; GO:0006355	DNA binding; nucleus; regulation of transcription, DNA	AT1G28310	NA	NA	Dof-type zinc finger DNA-binding family protein Dof-type zinc finger DNA-binding family protein	Potri.011G055600; Potri.011G054300; Potri.004G046600; Potri.004G046100
OG0000039	OG0000039_115	0.0153805	Potra2n11c23311	Bpev01.c0155.g0052.m0001	FUN_025419-T1	PA_chr09_G001556	PS_chr02_G006060	PS_chr02_G006060	GO:0003677; GO:0005634; GO:0006355	DNA binding; nucleus; regulation of transcription, DNA	AT1G28310	NA	NA	Dof-type zinc finger DNA-binding family protein Dof-type zinc finger DNA-binding family protein	Potri.011G055600; Potri.011G054300; Potri.004G046600; Potri.004G046100
OG0000039	OG0000039_116	0.0175973	Potra2n11c23311	Bpev01.c0155.g0052.m0001	FUN_026351-T1	PA_chr09_G001556	PS_chr02_G006060	PS_chr02_G006060	GO:0003677; GO:0005634; GO:0006355	DNA binding; nucleus; regulation of transcription, DNA	AT1G28310	NA	NA	Dof-type zinc finger DNA-binding family protein Dof-type zinc finger DNA-binding family protein	Potri.011G055600; Potri.011G054300; Potri.004G046600; Potri.004G046100
OG0000039	OG0000039_117	0.0134499	Potra2n11c23311	Bpev01.c0155.g0052.m0001	FUN_031978-T1	PA_chr09_G001556	PS_chr02_G006060	PS_chr02_G006060	GO:0003677; GO:0005634; GO:0006355	DNA binding; nucleus; regulation of transcription, DNA	AT1G28310	NA	NA	Dof-type zinc finger DNA-binding family protein Dof-type zinc finger DNA-binding family protein	Potri.011G055600; Potri.011G054300; Potri.004G046600; Potri.004G046100
OG0000039	OG0000039_118	0.0278071	Potra2n11c23311	Bpev01.c0155.g0052.m0001	FUN_021863-T1	PA_chr09_G001556	PS_chr02_G006060	PS_chr02_G006060	GO:0003677; GO:0005634; GO:0006355	DNA binding; nucleus; regulation of transcription, DNA	AT1G28310	NA	NA	Dof-type zinc finger DNA-binding family protein Dof-type zinc finger DNA-binding family protein	Potri.011G055600; Potri.011G054300; Potri.004G046600; Potri.004G046100
OG0000039	OG0000039_119	0.0135982	Potra2n11c23311	Bpev01.c0155.g0052.m0001	FUN_019322-T1	PA_chr09_G001556	PS_chr02_G006060	PS_chr02_G006060	GO:0003677; GO:0005634; GO:0006355	DNA binding; nucleus; regulation of transcription, DNA	AT1G28310	NA	NA	Dof-type zinc finger DNA-binding family protein Dof-type zinc finger DNA-binding family protein	Potri.011G055600; Potri.011G054300; Potri.004G046600; Potri.004G046100
OG0000039	OG0000039_120	0.0156771	Potra2n11c23311	Bpev01.c0155.g0052.m0001	FUN_032079-T1	PA_chr09_G001556	PS_chr02_G006060	PS_chr02_G006060	GO:0003677; GO:0005634; GO:0006355	DNA binding; nucleus; regulation of transcription, DNA	AT1G28310	NA	NA	Dof-type zinc finger DNA-binding family protein Dof-type zinc finger DNA-binding family protein	Potri.011G055600; Potri.011G054300; Potri.004G046600; Potri.004G046100
OG0000039	OG0000039_121	0.000821383	Potra2n11c23311	Bpev01.c0618.g0004.m0001	FUN_019322-T1	PA_chr09_G001556	PS_chr02_G006060	PS_chr02_G006060	GO:0003677; GO:0005634; GO:0006355	DNA binding; nucleus; regulation of transcription, DNA	AT1G28310	NA	NA	Dof-type zinc finger DNA-binding family protein Dof-type zinc finger DNA-binding family protein	Potri.011G055600; Potri.011G054300; Potri.004G046600; Potri.004G046100
OG0000039	OG0000039_123	0.000983483	Potra2n11c23311	Bpev01.c0618.g0004.m0001	FUN_025419-T1	PA_chr09_G001556	PS_chr02_G006060	PS_chr02_G006060	GO:0003677; GO:0005634; GO:0006355	DNA binding; nucleus; regulation of transcription, DNA	AT1G28310	NA	NA	Dof-type zinc finger DNA-binding family protein Dof-type zinc finger DNA-binding family protein	Potri.011G055600; Potri.011G054300; Potri.004G046600; Potri.004G046100
OG0000039	OG0000039_124	0.000809613	Potra2n11c23311	Bpev01.c0618.g0004.m0001	FUN_026351-T1	PA_chr09_G001556	PS_chr02_G006060	PS_chr02_G006060	GO:0003677; GO:0005634; GO:0006355	DNA binding; nucleus; regulation of transcription, DNA	AT1G28310	NA	NA	Dof-type zinc finger DNA-binding family protein Dof-type zinc finger DNA-binding family protein	Potri.011G055600; Potri.011G054300; Potri.004G046600; Potri.004G046100
OG0000039	OG0000039_125	0.00647115	Potra2n11c23311	Bpev01.c0618.g0004.m0001	FUN_031978-T1	PA_chr09_G001556	PS_chr02_G006060	PS_chr02_G006060	GO:0003677; GO:0005634; GO:0006355	DNA binding; nucleus; regulation of transcription, DNA	AT1G28310	NA	NA	Dof-type zinc finger DNA-binding family protein Dof-type zinc finger DNA-binding family protein	Potri.011G055600; Potri.011G054300; Potri.004G046600; Potri.004G046100
OG0000039	OG0000039_126	0.0149295	Potra2n11c23311	Bpev01.c0962.g0013.m0001	FUN_021863-T1	PA_chr09_G001556	PS_chr02_G006060	PS_chr02_G006060	GO:0003677; GO:0005634; GO:0006355	DNA binding; nucleus; regulation of transcription, DNA	AT1G28310	NA	NA	Dof-type zinc finger DNA-binding family protein Dof-type zinc finger DNA-binding family protein	Potri.011G055600; Potri.011G054300; Potri.004G046600; Potri.004G046100
OG0000039	OG0000039_127	0.00467654	Potra2n11c23311	Bpev01.c0962.g0013.m0001	FUN_019322-T1	PA_chr09_G001556	PS_chr02_G006060	PS_chr02_G006060	GO:0003677; GO:0005634; GO:0006355	DNA binding; nucleus; regulation of transcription, DNA	AT1G28310	NA	NA	Dof-type zinc finger DNA-binding family protein Dof-type zinc finger DNA-binding family protein	Potri.011G055600; Potri.011G054300; Potri.004G046600; Potri.004G046100
OG0000039	OG0000039_128	0.00297948	Potra2n11c23311	Bpev01.c0962.g0013.m0001	FUN_032079-T1	PA_chr09_G001556	PS_chr02_G006060	PS_chr02_G006060	GO:0003677; GO:0005634; GO:0006355	DNA binding; nucleus; regulation of transcription, DNA	AT1G28310	NA	NA	Dof-type zinc finger DNA-binding family protein Dof-type zinc finger DNA-binding family protein	Potri.011G055600; Potri.011G054300; Potri.004G046600; Potri.004G046100
OG0000039	OG0000039_129	0.000780476	Potra2n11c23311	Bpev01.c0962.g0013.m0001	FUN_025419-T1	PA_chr09_G001556	PS_chr02_G006060	PS_chr02_G006060	GO:0003677; GO:0005634; GO:0006355	DNA binding; nucleus; regulation of transcription, DNA	AT1G28310	NA	NA	Dof-type zinc finger DNA-binding family protein Dof-type zinc finger DNA-binding family protein	Potri.011G055600; Potri.011G054300; Potri.004G046600; Potri.004G046100
OG0000039	OG0000039_130	0.000780606	Potra2n11c23311	Bpev01.c0962.g0013.m0001	FUN_026351-T1	PA_chr09_G001556	PS_chr02_G006060	PS_chr02_G006060	GO:0003677; GO:0005634; GO:0006355	DNA binding; nucleus; regulation of transcription, DNA	AT1G28310	NA	NA	Dof-type zinc finger DNA-binding family protein Dof-type zinc finger DNA-binding family protein	Potri.011G055600; Potri.011G054300; Potri.004G046600; Potri.004G046100
OG0000039	OG0000039_131	0.000840843	Potra2n11c23311	Bpev01.c0962.g0013.m0001	FUN_031978-T1	PA_chr09_G001556	PS_chr02_G006060	PS_chr02_G006060	GO:0003677; GO:0005634; GO:0006355	DNA binding; nucleus; regulation of transcription, DNA	AT1G28310	NA	NA	Dof-type zinc finger DNA-binding family protein Dof-type zinc finger DNA-binding family protein	Potri.011G055600; Potri.011G054300; Potri.004G046600; Potri.004G046100
OG0000039	OG0000039_132	0.0079135	Potra2n11c23311	Bpev01.c0030.g0036.m0001	FUN_025419-T1	PA_chr09_G001556	PS_chr02_G006060	PS_chr09_G038070	GO:0003677; GO:0005634; GO:0006355	DNA binding; nucleus; regulation of transcription, DNA	AT1G28310	NA	NA	Dof-type zinc finger DNA-binding family protein Dof-type zinc finger DNA-binding family protein	Potri.011G055600; Potri.011G054300; Potri.004G046600; Potri.004G046100
OG0000039	OG0000039_133	0.0042135	Potra2n11c23311	Bpev01.c0030.g0036.m0001	FUN_026351-T1	PA_chr09_G001556	PS_chr02_G006060	PS_chr09_G038070	GO:0003677; GO:0005634; GO:0006355	DNA binding; nucleus; regulation of transcription, DNA	AT1G28310	NA	NA	Dof-type zinc finger DNA-binding family protein Dof-type zinc finger DNA-binding family protein	Potri.011G055600; Potri.011G054300; Potri.004G046600; Potri.004G046100
OG0000039	OG0000039_134	0.010343	Potra2n11c23311	Bpev01.c0030.g0036.m0001	FUN_031978-T1	PA_chr09_G001556	PS_chr02_G006060	PS_chr09_G038070	GO:0003677; GO:0005634; GO:0006355	DNA binding; nucleus; regulation of transcription, DNA	AT1G28310	NA	NA	Dof-type zinc finger DNA-binding family protein Dof-type zinc finger DNA-binding family protein	Potri.011G055600; Potri.011G054300; Potri.004G046600; Potri.004G046100
OG0000039	OG0000039_135	0.00113019	Potra2n11c23311	Bpev01.c0030.g0036.m0001	FUN_021863-T1	PA_chr09_G001556	PS_chr02_G006060	PS_chr09_G038070	GO:0003677; GO:0005634; GO:0006355	DNA binding; nucleus; regulation of transcription, DNA	AT1G28310	NA	NA	Dof-type zinc finger DNA-binding family protein Dof-type zinc finger DNA-binding family protein	Potri.011G055600; Potri.011G054300; Potri.004G046600; Potri.004G046100
OG0000039	OG0000039_136	0.00113043	Potra2n11c23311	Bpev01.c0030.g0036.m0001	FUN_019322-T1	PA_chr09_G001556	PS_chr02_G006060	PS_chr09_G038070	GO:0003677; GO:0005634; GO:0006355	DNA binding; nucleus; regulation of transcription, DNA	AT1G28310	NA	NA	Dof-type zinc finger DNA-binding family protein Dof-type zinc finger DNA-binding family protein	Potri.011G055600; Potri.011G054300; Potri.004G046600; Potri.004G046100
OG0000039	OG0000039_137	0.0011428	Potra2n11c23311	Bpev01.c0030.g0036.m0001	FUN_032079-T1	PA_chr09_G001556	PS_chr02_G006060	PS_chr09_G038070	GO:0003677; GO:0005634; GO:0006355	DNA binding; nucleus; regulation of transcription, DNA	AT1G28310	NA	NA	Dof-type zinc finger DNA-binding family protein Dof-type zinc finger DNA-binding family protein	Potri.011G055600; Potri.011G054300; Potri.004G046600; Potri.004G046100
OG0000039	OG0000039_138	0.00526	Potra2n11c23311	Bpev01.c0896.g0007.m0001	FUN_025419-T1	PA_chr09_G001556	PS_chr02_G006060	PS_chr09_G038070	GO:0003677; GO:0005634; GO:0006355	DNA binding; nucleus; regulation of transcription, DNA	AT1G28310	NA	NA	Dof-type zinc finger DNA-binding family protein Dof-type zinc finger DNA-binding family protein	Potri.011G055600; Potri.011G054300; Potri.004G046600; Potri.004G046100
OG0000039	OG0000039_139	0.00784334	Potra2n11c23311	Bpev01.c0896.g0007.m0001	FUN_026351-T1	PA_chr09_G001556	PS_chr02_G006060	PS_chr09_G038070	GO:0003677; GO:0005634; GO:0006355	DNA binding; nucleus; regulation of transcription, DNA	AT1G28310	NA	NA	Dof-type zinc finger DNA-binding family protein Dof-type zinc finger DNA-binding family protein	Potri.011G055600; Potri.011G054300; Potri.004G046600; Potri.004G046100
OG0000039	OG0000039_140	0.00435035	Potra2n11c23311	Bpev01.c0896.g0007.m0001	FUN_031978-T1	PA_chr09_G001556	PS_chr02_G006060	PS_chr09_G038070	GO:0003677; GO:0005634; GO:0006355	DNA binding; nucleus; regulation of transcription, DNA	AT1G28310	NA	NA	Dof-type zinc finger DNA-binding family protein Dof-type zinc finger DNA-binding family protein	Potri.011G055600; Potri.011G054300; Potri.004G046600; Potri.004G046100
OG0000039	OG0000039_141	0.00429336	Potra2n11c23311	Bpev01.c0896.g0007.m0001	FUN_021863-T1	PA_chr09_G001556	PS_chr02_G006060	PS_chr09_G038070	GO:0003677; GO:0005634; GO:0006355	DNA binding; nucleus; regulation of transcription, DNA	AT1G28310	NA	NA	Dof-type zinc finger DNA-binding family protein Dof-type zinc finger DNA-binding family protein	Potri.011G055600; Potri.011G054300; Potri.004G046600; Potri.004G046100
OG0000039	OG0000039_142	0.00429359	Potra2n11c23311	Bpev01.c0896.g0007.m0001	FUN_019322-T1	PA_chr09_G001556	PS_chr02_G006060	PS_chr09_G038070	GO:0003677; GO:0005634; GO:0006355	DNA binding; nucleus; regulation of transcription, DNA	AT1G28310	NA	NA	Dof-type zinc finger DNA-binding family protein Dof-type zinc finger DNA-binding family protein	Potri.011G055600; Potri.011G054300; Potri.004G046600; Potri.004G046100
OG0000039	OG0000039_143	0.00430597	Potra2n11c23311	Bpev01.c0896.g0007.m0001	FUN_032079-T1	PA_chr09_G001556	PS_chr02_G006060	PS_chr09_G038070	GO:0003677; GO:0005634; GO:0006355	DNA binding; nucleus; regulation of transcription, DNA	AT1G28310	NA	NA	Dof-type zinc finger DNA-binding family protein Dof-type zinc finger DNA-binding family protein	Potri.011G055600; Potri.011G054300; Potri.004G046600; Potri.004G046100
OG0000039	OG0000039_144	0.00102722	Potra2n11c23311	Bpev01.c0188.g0017.m0001	FUN_025419-T1	PA_chr09_G001556	PS_chr02_G006060	PS_chr09_G038070	GO:0003677; GO:0005634; GO:0006355	DNA binding; nucleus; regulation of transcription, DNA	AT1G28310	NA	NA	Dof-type zinc finger DNA-binding family protein Dof-type zinc finger DNA-binding family protein	Potri.011G055600; Potri.011G054300; Potri.004G046600; Potri.004G046100
OG0000039	OG0000039_145	0.00103579	Potra2n11c23311	Bpev01.c0188.g0017.m0001	FUN_026351-T1	PA_chr09_G001556	PS_chr02_G006060	PS_chr09_G038070	GO:0003677; GO:0005634; GO:0006355	DNA binding; nucleus; regulation of transcription, DNA	AT1G28310	NA	NA	Dof-type zinc finger DNA-binding family protein Dof-type zinc finger DNA-binding family protein	Potri.011G055600; Potri.011G054300; Potri.004G046600; Potri.004G046100
OG0000039	OG0000039_146	0.00104005	Potra2n11c23311	Bpev01.c0188.g0017.m0001	FUN_031978-T1	PA_chr09_G001556	PS_chr02_G006060	PS_chr09_G038070	GO:0003677; GO:0005634; GO:0006355	DNA binding; nucleus; regulation of transcription, DNA	AT1G28310	NA	NA	Dof-type zinc finger DNA-binding family protein Dof-type zinc finger DNA-binding family protein	Potri.011G055600; Potri.011G054300; Potri.004G046600; Potri.004G046100
OG0000039	OG0000039_147	0.00125572	Potra2n11c23311	Bpev01.c0188.g0017.m0001	FUN_019322-T1	PA_chr09_G001556	PS_chr02_G006060	PS_chr09_G038070	GO:0003677; GO:0005634; GO:0006355	DNA binding; nucleus; regulation of transcription, DNA	AT1G28310	NA	NA	Dof-type zinc finger DNA-binding family protein Dof-type zinc finger DNA-binding family protein	Potri.011G055600; Potri.011G054300; Potri.004G046600; Potri.004G046100
OG0000039	OG0000039_148	0.00102721	Potra2n11c23311	Bpev01.c0188.g0017.m0001	FUN_021863-T1	PA_chr09_G001556	PS_chr02_G006060	PS_chr09_G038070	GO:0003677; GO:0005634; GO:0006355	DNA binding; nucleus; regulation of transcription, DNA	AT1G28310	NA	NA	Dof-type zinc finger DNA-binding family protein Dof-type zinc finger DNA-binding family protein	Potri.011G055600; Potri.011G054300; Potri.004G046600; Potri.004G046100
OG0000039	OG0000039_149	0.00115142	Potra2n11c23311	Bpev01.c0188.g0017.m0001	FUN_032079-T1	PA_chr09_G001556	PS_chr02_G006060	PS_chr09_G038070	GO:0003677; GO:0005634; GO:0006355	DNA binding; nucleus; regulation of transcription, DNA	AT1G28310	NA	NA	Dof-type zinc finger DNA-binding family protein Dof-type zinc finger DNA-binding family protein	Potri.011G055600; Potri.011G054300; Potri.004G046600; Potri.004G046100
OG0000039	OG0000039_150	0.0156267	Potra2n11c23311	Bpev01.c0155.g0052.m0001	FUN_025419-T1	PA_chr09_G001556	PS_chr02_G006060	PS_chr09_G038070	GO:0003677; GO:0005634; GO:0006355	DNA binding; nucleus; regulation of transcription, DNA	AT1G28310	NA	NA	Dof-type zinc finger DNA-binding family protein Dof-type zinc finger DNA-binding family protein	Potri.011G055600; Potri.011G054300; Potri.004G046600; Potri.004G046100
OG0000039	OG0000039_151	0.0178433	Potra2n11c23311	Bpev01.c0155.g0052.m0001	FUN_026351-T1	PA_chr09_G001556	PS_chr02_G006060	PS_chr09_G038070	GO:0003677; GO:0005634; GO:0006355	DNA binding; nucleus; regulation of transcription, DNA	AT1G28310	NA	NA	Dof-type zinc finger DNA-binding family protein Dof-type zinc finger DNA-binding family protein	Potri.011G055600; Potri.011G054300; Potri.004G046600; Potri.004G046100
OG0000039	OG0000039_152	0.0136579	Potra2n11c23311	Bpev01.c0155.g0052.m0001	FUN_031978-T1	PA_chr09_G001556	PS_chr02_G006060	PS_chr09_G038070	GO:0003677; GO:0005634; GO:0006355	DNA binding; nucleus; regulation of transcription, DNA	AT1G28310	NA	NA	Dof-type zinc finger DNA-binding family protein Dof-type zinc finger DNA-binding family protein	Potri.011G055600; Potri.011G054300; Potri.004G046600; Potri.004G046100
OG0000039	OG0000039_153	0.01407	Potra2n11c23311	Bpev01.c0155.g0052.m0001	FUN_021863-T1	PA_chr09_G001556	PS_chr02_G006060	PS_chr09_G038070	GO:0003677; GO:0005634; GO:0006355	DNA binding; nucleus; regulation of transcription, DNA	AT1G28310	NA	NA	Dof-type zinc finger DNA-binding family protein Dof-type zinc finger DNA-binding family protein	Potri.011G055600; Potri.011G054300; Potri.004G046600; Potri.004G046100
OG0000039	OG0000039_154	0.0138319	Potra2n11c23311	Bpev01.c0155.g0052.m0001	FUN_019322-T1	PA_chr09_G001556	PS_chr02_G006060	PS_chr09_G038070	GO:0003677; GO:0005634; GO:0006355	DNA binding; nucleus; regulation of transcription, DNA	AT1G28310	NA	NA	Dof-type zinc finger DNA-binding family protein Dof-type zinc finger DNA-binding family protein	Potri.011G055600; Potri.011G054300; Potri.004G046600; Potri.004G046100
OG0000039	OG0000039_155	0.0139026	Potra2n11c23311	Bpev01.c0155.g0052.m0001	FUN_032079-T1	PA_chr09_G001556	PS_chr02_G006060	PS_chr09_G038070	GO:0003677; GO:0005634; GO:0006355	DNA binding; nucleus; regulation of transcription, DNA	AT1G28310	NA	NA	Dof-type zinc finger DNA-binding family protein Dof-type zinc finger DNA-binding family protein	Potri.011G055600; Potri.011G054300; Potri.004G046600; Potri.004G046100
OG0000039	OG0000039_156	0.00738328	Potra2n11c23311	Bpev01.c0618.g0004.m0001	FUN_019322-T1	PA_chr09_G001556	PS_chr02_G006060	PS_chr09_G038070	GO:0003677; GO:0005634; GO:0006355	DNA binding; nucleus; regulation of transcription, DNA	AT1G28310	NA	NA	Dof-type zinc finger DNA-binding family protein Dof-type zinc finger DNA-binding family protein	Potri.011G055600; Potri.011G054300; Potri.004G046600; Potri.004G046100
OG0000039	OG0000039_157	0.00739565	Potra2n11c23311	Bpev01.c0618.g0004.m0001	FUN_032079-T1	PA_chr09_G001556	PS_chr02_G006060	PS_chr09_G038070	GO:0003677; GO:0005634; GO:0006355	DNA binding; nucleus; regulation of transcription, DNA	AT1G28310	NA	NA	Dof-type zinc finger DNA-binding family protein Dof-type zinc finger DNA-binding family protein	Potri.011G055600; Potri.011G054300; Potri.004G046600; Potri.004G046100
OG0000039	OG0000039_158	0.00122968	Potra2n11c23311	Bpev01.c0618.g0004.m0001	FUN_025419-T1	PA_chr09_G001556	PS_chr02_G006060	PS_chr09_G038070	GO:0003677; GO:0005634; GO:0006355	DNA binding; nucleus; regulation of transcription, DNA	AT1G28310	NA	NA	Dof-type zinc finger DNA-binding family protein Dof-type zinc finger DNA-binding family protein	Potri.011G055600; Potri.011G054300; Potri.004G046600; Potri.004G046100
OG0000039	OG0000039_159	0.00105569	Potra2n11c23311	Bpev01.c0618.g0004.m0001	FUN_026351-T1	PA_chr09_G001556	PS_chr02_G006060	PS_chr09_G038070	GO:0003677; GO:0005634; GO:0006355	DNA binding; nucleus; regulation of transcription, DNA	AT1G28310	NA	NA	Dof-type zinc finger DNA-binding family protein Dof-type zinc finger DNA-binding family protein	Potri.011G055600; Potri.011G054300; Potri.004G046600; Potri.004G046100
OG0000039	OG0000039_160	0.0066792	Potra2n11c23311	Bpev01.c0618.g0004.m0001	FUN_031978-T1	PA_chr09_G001556	PS_chr02_G006060	PS_chr09_G038070	GO:0003677; GO:0005634; GO:0006355	DNA binding; nucleus; regulation of transcription, DNA	AT1G28310	NA	NA	Dof-type zinc finger DNA-binding family protein Dof-type zinc finger DNA-binding family protein	Potri.011G055600; Potri.011G054300; Potri.004G046600; Potri.004G046100
OG0000039	OG0000039_161	0.00919337	Potra2n11c23311	Bpev01.c0962.g0013.m0001	FUN_021863-T1	PA_chr09_G001556	PS_chr02_G006060	PS_chr09_G038070	GO:0003677; GO:0005634; GO:0006355	DNA binding; nucleus; regulation of transcription, DNA	AT1G28310	NA	NA	Dof-type zinc finger DNA-binding family protein Dof-type zinc finger DNA-binding family protein	Potri.011G055600; Potri.011G054300; Potri.004G046600; Potri.004G046100
OG0000039	OG0000039_162	0.00491027	Potra2n11c23311	Bpev01.c0962.g0013.m0001	FUN_019322-T1	PA_chr09_G001556	PS_chr02_G006060	PS_chr09_G038070	GO:0003677; GO:0005634; GO:0006355	DNA binding; nucleus; regulation of transcription, DNA	AT1G28310	NA	NA	Dof-type zinc finger DNA-binding family protein Dof-type zinc finger DNA-binding family protein	Potri.011G055600; Potri.011G054300; Potri.004G046600; Potri.004G046100
OG0000039	OG0000039_163	0.00920598	Potra2n11c23311	Bpev01.c0962.g0013.m0001	FUN_032079-T1	PA_chr09_G001556	PS_chr02_G006060	PS_chr09_G038070	GO:0003677; GO:0005634; GO:0006355	DNA binding; nucleus; regulation of transcription, DNA	AT1G28310	NA	NA	Dof-type zinc finger DNA-binding family protein Dof-type zinc finger DNA-binding family protein	Potri.011G055600; Potri.011G054300; Potri.004G046600; Potri.004G046100
OG0000039	OG0000039_164	0.00102668	Potra2n11c23311	Bpev01.c0962.g0013.m0001	FUN_025419-T1	PA_chr09_G001556	PS_chr02_G006060	PS_chr09_G038070	GO:0003677; GO:0005634; GO:0006355	DNA binding; nucleus; regulation of transcription, DNA	AT1G28310	NA	NA	Dof-type zinc finger DNA-binding family protein Dof-type zinc finger DNA-binding family protein	Potri.011G055600; Potri.011G054300; Potri.004G046600; Potri.004G046100
OG0000039	OG0000039_165	0.00102668	Potra2n11c23311	Bpev01.c0962.g0013.m0001	FUN_026351-T1	PA_chr09_G001556	PS_chr02_G006060	PS_chr09_G038070	GO:0003677; GO:0005634; GO:0006355	DNA binding; nucleus; regulation of transcription, DNA	AT1G28310	NA	NA	Dof-type zinc finger DNA-binding family protein Dof-type zinc finger DNA-binding family protein	Potri.011G055600; Potri.011G054300; Potri.004G046600; Potri.004G046100
OG0000039	OG0000039_166	0.00104889	Potra2n11c23311	Bpev01.c0962.g0013.m0001	FUN_031978-T1	PA_chr09_G001556	PS_chr02_G006060	PS_chr09_G038070	GO:0003677; GO:0005634; GO:0006355	DNA binding; nucleus; regulation of transcription, DNA	AT1G28310	NA	NA	Dof-type zinc finger DNA-binding family protein Dof-type zinc finger DNA-binding family protein	Potri.011G055600; Potri.011G054300; Potri.004G046600; Potri.004G046100
OG0000039	OG0000039_167	0.00143046	Potra2n11c23311	Bpev01.c0188.g0017.m0001	FUN_019322-T1	PA_chr09_G001556	PS_chr02_G006060	PS_chr08_G035003	GO:0003677; GO:0005634; GO:0006355	DNA binding; nucleus; regulation of transcription, DNA	AT1G28310	NA	NA	Dof-type zinc finger DNA-binding family protein Dof-type zinc finger DNA-binding family protein	Potri.011G055600; Potri.011G054300; Potri.004G046600; Potri.004G046100
OG0000039	OG0000039_168	0.00130517	Potra2n11c23311	Bpev01.c0030.g0036.m0001	FUN_019322-T1	PA_chr09_G001556	PS_chr02_G006060	PS_chr08_G035003	GO:0003677; GO:0005634; GO:0006355	DNA binding; nucleus; regulation of transcription, DNA	AT1G28310	NA	NA	Dof-type zinc finger DNA-binding family protein Dof-type zinc finger DNA-binding family protein	Potri.011G055600; Potri.011G054300; Potri.004G046600; Potri.004G046100
OG0000039	OG0000039_169	0.00446833	Potra2n11c23311	Bpev01.c0896.g0007.m0001	FUN_019322-T1	PA_chr09_G001556	PS_chr02_G006060	PS_chr08_G035003	GO:0003677; GO:0005634; GO:0006355	DNA binding; nucleus; regulation of transcription, DNA	AT1G28310	NA	NA	Dof-type zinc finger DNA-binding family protein Dof-type zinc finger DNA-binding family protein	Potri.011G055600; Potri.011G054300; Potri.004G046600; Potri.004G046100
OG0000039	OG0000039_170	0.00508501	Potra2n11c23311	Bpev01.c0962.g0013.m0001	FUN_019322-T1	PA_chr09_G001556	PS_chr02_G006060	PS_chr08_G035003	GO:0003677; GO:0005634; GO:0006355	DNA binding; nucleus; regulation of transcription, DNA	AT1G28310	NA	NA	Dof-type zinc finger DNA-binding family protein Dof-type zinc finger DNA-binding family protein	Potri.011G055600; Potri.011G054300; Potri.004G046600; Potri.004G046100
OG0000039	OG0000039_171	0.0140067	Potra2n11c23311	Bpev01.c0155.g0052.m0001	FUN_019322-T1	PA_chr09_G001556	PS_chr02_G006060	PS_chr08_G035003	GO:0003677; GO:0005634; GO:0006355	DNA binding; nucleus; regulation of transcription, DNA	AT1G28310	NA	NA	Dof-type zinc finger DNA-binding family protein Dof-type zinc finger DNA-binding family protein	Potri.011G055600; Potri.011G054300; Potri.004G046600; Potri.004G046100
OG0000039	OG0000039_172	0.00122985	Potra2n11c23311	Bpev01.c0618.g0004.m0001	FUN_019322-T1	PA_chr09_G001556	PS_chr02_G006060	PS_chr08_G035003	GO:0003677; GO:0005634; GO:0006355	DNA binding; nucleus; regulation of transcription, DNA	AT1G28310	NA	NA	Dof-type zinc finger DNA-binding family protein Dof-type zinc finger DNA-binding family protein	Potri.011G055600; Potri.011G054300; Potri.004G046600; Potri.004G046100
OG0000039	OG0000039_173	0.00130663	Potra2n11c23311	Bpev01.c0030.g0036.m0001	FUN_032079-T1	PA_chr09_G001556	PS_chr02_G006060	PS_chr08_G035003	GO:0003677; GO:0005634; GO:0006355	DNA binding; nucleus; regulation of transcription, DNA	AT1G28310	NA	NA	Dof-type zinc finger DNA-binding family protein Dof-type zinc finger DNA-binding family protein	Potri.011G055600; Potri.011G054300; Potri.004G046600; Potri.004G046100
OG0000039	OG0000039_174	0.0044698	Potra2n11c23311	Bpev01.c0896.g0007.m0001	FUN_032079-T1	PA_chr09_G001556	PS_chr02_G006060	PS_chr08_G035003	GO:0003677; GO:0005634; GO:0006355	DNA binding; nucleus; regulation of transcription, DNA	AT1G28310	NA	NA	Dof-type zinc finger DNA-binding family protein Dof-type zinc finger DNA-binding family protein	Potri.011G055600; Potri.011G054300; Potri.004G046600; Potri.004G046100
OG0000039	OG0000039_175	0.00281647	Potra2n11c23311	Bpev01.c0962.g0013.m0001	FUN_032079-T1	PA_chr09_G001556	PS_chr02_G006060	PS_chr08_G035003	GO:0003677; GO:0005634; GO:0006355	DNA binding; nucleus; regulation of transcription, DNA	AT1G28310	NA	NA	Dof-type zinc finger DNA-binding family protein Dof-type zinc finger DNA-binding family protein	Potri.011G055600; Potri.011G054300; Potri.004G046600; Potri.004G046100
OG0000039	OG0000039_176	0.00131525	Potra2n11c23311	Bpev01.c0188.g0017.m0001	FUN_032079-T1	PA_chr09_G001556	PS_chr02_G006060	PS_chr08_G035003	GO:0003677; GO:0005634; GO:0006355	DNA binding; nucleus; regulation of transcription, DNA	AT1G28310	NA	NA	Dof-type zinc finger DNA-binding family protein Dof-type zinc finger DNA-binding family protein	Potri.011G055600; Potri.011G054300; Potri.004G046600; Potri.004G046100
OG0000039	OG0000039_177	0.0140665	Potra2n11c23311	Bpev01.c0155.g0052.m0001	FUN_032079-T1	PA_chr09_G001556	PS_chr02_G006060	PS_chr08_G035003	GO:0003677; GO:0005634; GO:0006355	DNA binding; nucleus; regulation of transcription, DNA	AT1G28310	NA	NA	Dof-type zinc finger DNA-binding family protein Dof-type zinc finger DNA-binding family protein	Potri.011G055600; Potri.011G054300; Potri.004G046600; Potri.004G046100
OG0000039	OG0000039_179	0.00130517	Potra2n11c23311	Bpev01.c0030.g0036.m0001	FUN_021863-T1	PA_chr09_G001556	PS_chr02_G006060	PS_chr08_G035003	GO:0003677; GO:0005634; GO:0006355	DNA binding; nucleus; regulation of transcription, DNA	AT1G28310	NA	NA	Dof-type zinc finger DNA-binding family protein Dof-type zinc finger DNA-binding family protein	Potri.011G055600; Potri.011G054300; Potri.004G046600; Potri.004G046100
OG0000039	OG0000039_180	0.00446834	Potra2n11c23311	Bpev01.c0896.g0007.m0001	FUN_021863-T1	PA_chr09_G001556	PS_chr02_G006060	PS_chr08_G035003	GO:0003677; GO:0005634; GO:0006355	DNA binding; nucleus; regulation of transcription, DNA	AT1G28310	NA	NA	Dof-type zinc finger DNA-binding family protein Dof-type zinc finger DNA-binding family protein	Potri.011G055600; Potri.011G054300; Potri.004G046600; Potri.004G046100
OG0000039	OG0000039_181	0.00281501	Potra2n11c23311	Bpev01.c0962.g0013.m0001	FUN_021863-T1	PA_chr09_G001556	PS_chr02_G006060	PS_chr08_G035003	GO:0003677; GO:0005634; GO:0006355	DNA binding; nucleus; regulation of transcription, DNA	AT1G28310	NA	NA	Dof-type zinc finger DNA-binding family protein Dof-type zinc finger DNA-binding family protein	Potri.011G055600; Potri.011G054300; Potri.004G046600; Potri.004G046100
OG0000039	OG0000039_182	0.0173521	Potra2n11c23311	Bpev01.c0188.g0017.m0001	FUN_021863-T1	PA_chr09_G001556	PS_chr02_G006060	PS_chr08_G035003	GO:0003677; GO:0005634; GO:0006355	DNA binding; nucleus; regulation of transcription, DNA	AT1G28310	NA	NA	Dof-type zinc finger DNA-binding family protein Dof-type zinc finger DNA-binding family protein	Potri.011G055600; Potri.011G054300; Potri.004G046600; Potri.004G046100
OG0000039	OG0000039_183	0.014245	Potra2n11c23311	Bpev01.c0155.g0052.m0001	FUN_021863-T1	PA_chr09_G001556	PS_chr02_G006060	PS_chr08_G035003	GO:0003677; GO:0005634; GO:0006355	DNA binding; nucleus; regulation of transcription, DNA	AT1G28310	NA	NA	Dof-type zinc finger DNA-binding family protein Dof-type zinc finger DNA-binding family protein	Potri.011G055600; Potri.011G054300; Potri.004G046600; Potri.004G046100
OG0000039	OG0000039_184	0.00808864	Potra2n11c23311	Bpev01.c0030.g0036.m0001	FUN_025419-T1	PA_chr09_G001556	PS_chr02_G006060	PS_chr08_G035003	GO:0003677; GO:0005634; GO:0006355	DNA binding; nucleus; regulation of transcription, DNA	AT1G28310	NA	NA	Dof-type zinc finger DNA-binding family protein Dof-type zinc finger DNA-binding family protein	Potri.011G055600; Potri.011G054300; Potri.004G046600; Potri.004G046100
OG0000039	OG0000039_185	0.00543514	Potra2n11c23311	Bpev01.c0896.g0007.m0001	FUN_025419-T1	PA_chr09_G001556	PS_chr02_G006060	PS_chr08_G035003	GO:0003677; GO:0005634; GO:0006355	DNA binding; nucleus; regulation of transcription, DNA	AT1G28310	NA	NA	Dof-type zinc finger DNA-binding family protein Dof-type zinc finger DNA-binding family protein	Potri.011G055600; Potri.011G054300; Potri.004G046600; Potri.004G046100
OG0000039	OG0000039_186	0.00120235	Potra2n11c23311	Bpev01.c0188.g0017.m0001	FUN_025419-T1	PA_chr09_G001556	PS_chr02_G006060	PS_chr08_G035003	GO:0003677; GO:0005634; GO:0006355	DNA binding; nucleus; regulation of transcription, DNA	AT1G28310	NA	NA	Dof-type zinc finger DNA-binding family protein Dof-type zinc finger DNA-binding family protein	Potri.011G055600; Potri.011G054300; Potri.004G046600; Potri.004G046100
OG0000039	OG0000039_187	0.0158018	Potra2n11c23311	Bpev01.c0155.g0052.m0001	FUN_025419-T1	PA_chr09_G001556	PS_chr02_G006060	PS_chr08_G035003	GO:0003677; GO:0005634; GO:0006355	DNA binding; nucleus; regulation of transcription, DNA	AT1G28310	NA	NA	Dof-type zinc finger DNA-binding family protein Dof-type zinc finger DNA-binding family protein	Potri.011G055600; Potri.011G054300; Potri.004G046600; Potri.004G046100
OG0000039	OG0000039_188	0.00120181	Potra2n11c23311	Bpev01.c0962.g0013.m0001	FUN_025419-T1	PA_chr09_G001556	PS_chr02_G006060	PS_chr08_G035003	GO:0003677; GO:0005634; GO:0006355	DNA binding; nucleus; regulation of transcription, DNA	AT1G28310	NA	NA	Dof-type zinc finger DNA-binding family protein Dof-type zinc finger DNA-binding family protein	Potri.011G055600; Potri.011G054300; Potri.004G046600; Potri.004G046100
OG0000039	OG0000039_189	0.00140482	Potra2n11c23311	Bpev01.c0618.g0004.m0001	FUN_025419-T1	PA_chr09_G001556	PS_chr02_G006060	PS_chr08_G035003	GO:0003677; GO:0005634; GO:0006355	DNA binding; nucleus; regulation of transcription, DNA	AT1G28310	NA	NA	Dof-type zinc finger DNA-binding family protein Dof-type zinc finger DNA-binding family protein	Potri.011G055600; Potri.011G054300; Potri.004G046600; Potri.004G046100
OG0000039	OG0000039_190	0.0071385	Potra2n11c23311	Bpev01.c0030.g0036.m0001	FUN_026351-T1	PA_chr09_G001556	PS_chr02_G006060	PS_chr08_G035003	GO:0003677; GO:0005634; GO:0006355	DNA binding; nucleus; regulation of transcription, DNA	AT1G28310	NA	NA	Dof-type zinc finger DNA-binding family protein Dof-type zinc finger DNA-binding family protein	Potri.011G055600; Potri.011G054300; Potri.004G046600; Potri.004G046100
OG0000039	OG0000039_191	0.0107683	Potra2n11c23311	Bpev01.c0896.g0007.m0001	FUN_026351-T1	PA_chr09_G001556	PS_chr02_G006060	PS_chr08_G035003	GO:0003677; GO:0005634; GO:0006355	DNA binding; nucleus; regulation of transcription, DNA	AT1G28310	NA	NA	Dof-type zinc finger DNA-binding family protein Dof-type zinc finger DNA-binding family protein	Potri.011G055600; Potri.011G054300; Potri.004G046600; Potri.004G046100
OG0000039	OG0000039_192	0.00396079	Potra2n11c23311	Bpev01.c0188.g0017.m0001	FUN_026351-T1	PA_chr09_G001556	PS_chr02_G006060	PS_chr08_G035003	GO:0003677; GO:0005634; GO:0006355	DNA binding; nucleus; regulation of transcription, DNA	AT1G28310	NA	NA	Dof-type zinc finger DNA-binding family protein Dof-type zinc finger DNA-binding family protein	Potri.011G055600; Potri.011G054300; Potri.004G046600; Potri.004G046100
OG0000039	OG0000039_193	0.0207683	Potra2n11c23311	Bpev01.c0155.g0052.m0001	FUN_026351-T1	PA_chr09_G001556	PS_chr02_G006060	PS_chr08_G035003	GO:0003677; GO:0005634; GO:0006355	DNA binding; nucleus; regulation of transcription, DNA	AT1G28310	NA	NA	Dof-type zinc finger DNA-binding family protein Dof-type zinc finger DNA-binding family protein	Potri.011G055600; Potri.011G054300; Potri.004G046600; Potri.004G046100
OG0000039	OG0000039_194	0.00395168	Potra2n11c23311	Bpev01.c0962.g0013.m0001	FUN_026351-T1	PA_chr09_G001556	PS_chr02_G006060	PS_chr08_G035003	GO:0003677; GO:0005634; GO:0006355	DNA binding; nucleus; regulation of transcription, DNA	AT1G28310	NA	NA	Dof-type zinc finger DNA-binding family protein Dof-type zinc finger DNA-binding family protein	Potri.011G055600; Potri.011G054300; Potri.004G046600; Potri.004G046100
OG0000039	OG0000039_195	0.00398068	Potra2n11c23311	Bpev01.c0618.g0004.m0001	FUN_026351-T1	PA_chr09_G001556	PS_chr02_G006060	PS_chr08_G035003	GO:0003677; GO:0005634; GO:0006355	DNA binding; nucleus; regulation of transcription, DNA	AT1G28310	NA	NA	Dof-type zinc finger DNA-binding family protein Dof-type zinc finger DNA-binding family protein	Potri.011G055600; Potri.011G054300; Potri.004G046600; Potri.004G046100
OG0000039	OG0000039_196	0.0129218	Potra2n11c23311	Bpev01.c0030.g0036.m0001	FUN_031978-T1	PA_chr09_G001556	PS_chr02_G006060	PS_chr08_G035003	GO:0003677; GO:0005634; GO:0006355	DNA binding; nucleus; regulation of transcription, DNA	AT1G28310	NA	NA	Dof-type zinc finger DNA-binding family protein Dof-type zinc finger DNA-binding family protein	Potri.011G055600; Potri.011G054300; Potri.004G046600; Potri.004G046100
OG0000039	OG0000039_197	0.00692917	Potra2n11c23311	Bpev01.c0896.g0007.m0001	FUN_031978-T1	PA_chr09_G001556	PS_chr02_G006060	PS_chr08_G035003	GO:0003677; GO:0005634; GO:0006355	DNA binding; nucleus; regulation of transcription, DNA	AT1G28310	NA	NA	Dof-type zinc finger DNA-binding family protein Dof-type zinc finger DNA-binding family protein	Potri.011G055600; Potri.011G054300; Potri.004G046600; Potri.004G046100
OG0000039	OG0000039_198	0.00361887	Potra2n11c23311	Bpev01.c0188.g0017.m0001	FUN_031978-T1	PA_chr09_G001556	PS_chr02_G006060	PS_chr08_G035003	GO:0003677; GO:0005634; GO:0006355	DNA binding; nucleus; regulation of transcription, DNA	AT1G28310	NA	NA	Dof-type zinc finger DNA-binding family protein Dof-type zinc finger DNA-binding family protein	Potri.011G055600; Potri.011G054300; Potri.004G046600; Potri.004G046100
OG0000039	OG0000039_199	0.0162367	Potra2n11c23311	Bpev01.c0155.g0052.m0001	FUN_031978-T1	PA_chr09_G001556	PS_chr02_G006060	PS_chr08_G035003	GO:0003677; GO:0005634; GO:0006355	DNA binding; nucleus; regulation of transcription, DNA	AT1G28310	NA	NA	Dof-type zinc finger DNA-binding family protein Dof-type zinc finger DNA-binding family protein	Potri.011G055600; Potri.011G054300; Potri.004G046600; Potri.004G046100
OG0000039	OG0000039_200	0.00362771	Potra2n11c23311	Bpev01.c0962.g0013.m0001	FUN_031978-T1	PA_chr09_G001556	PS_chr02_G006060	PS_chr08_G035003	GO:0003677; GO:0005634; GO:0006355	DNA binding; nucleus; regulation of transcription, DNA	AT1G28310	NA	NA	Dof-type zinc finger DNA-binding family protein Dof-type zinc finger DNA-binding family protein	Potri.011G055600; Potri.011G054300; Potri.004G046600; Potri.004G046100
OG0000039	OG0000039_201	0.00925802	Potra2n11c23311	Bpev01.c0618.g0004.m0001	FUN_031978-T1	PA_chr09_G001556	PS_chr02_G006060	PS_chr08_G035003	GO:0003677; GO:0005634; GO:0006355	DNA binding; nucleus; regulation of transcription, DNA	AT1G28310	NA	NA	Dof-type zinc finger DNA-binding family protein Dof-type zinc finger DNA-binding family protein	Potri.011G055600; Potri.011G054300; Potri.004G046600; Potri.004G046100
OG0000039	OG0000039_202	0.00678548	Potra2n11c23311	Bpev01.c0030.g0036.m0001	FUN_025419-T1	PA_chr09_G001556	PS_chr09_G038070	PS_chr02_G006060	GO:0003677; GO:0005634; GO:0006355	DNA binding; nucleus; regulation of transcription, DNA	AT1G28310	NA	NA	Dof-type zinc finger DNA-binding family protein Dof-type zinc finger DNA-binding family protein	Potri.011G055600; Potri.011G054300; Potri.004G046600; Potri.004G046100
OG0000039	OG0000039_203	0.00308562	Potra2n11c23311	Bpev01.c0030.g0036.m0001	FUN_026351-T1	PA_chr09_G001556	PS_chr09_G038070	PS_chr02_G006060	GO:0003677; GO:0005634; GO:0006355	DNA binding; nucleus; regulation of transcription, DNA	AT1G28310	NA	NA	Dof-type zinc finger DNA-binding family protein Dof-type zinc finger DNA-binding family protein	Potri.011G055600; Potri.011G054300; Potri.004G046600; Potri.004G046100
OG0000039	OG0000039_204	0.0130365	Potra2n11c23311	Bpev01.c0030.g0036.m0001	FUN_031978-T1	PA_chr09_G001556	PS_chr09_G038070	PS_chr02_G006060	GO:0003677; GO:0005634; GO:0006355	DNA binding; nucleus; regulation of transcription, DNA	AT1G28310	NA	NA	Dof-type zinc finger DNA-binding family protein Dof-type zinc finger DNA-binding family protein	Potri.011G055600; Potri.011G054300; Potri.004G046600; Potri.004G046100
OG0000039	OG0000039_205	0.0139876	Potra2n11c23311	Bpev01.c0030.g0036.m0001	FUN_021863-T1	PA_chr09_G001556	PS_chr09_G038070	PS_chr02_G006060	GO:0003677; GO:0005634; GO:0006355	DNA binding; nucleus; regulation of transcription, DNA	AT1G28310	NA	NA	Dof-type zinc finger DNA-binding family protein Dof-type zinc finger DNA-binding family protein	Potri.011G055600; Potri.011G054300; Potri.004G046600; Potri.004G046100
OG0000039	OG0000039_206	1.64249e-05	Potra2n11c23311	Bpev01.c0030.g0036.m0001	FUN_019322-T1	PA_chr09_G001556	PS_chr09_G038070	PS_chr02_G006060	GO:0003677; GO:0005634; GO:0006355	DNA binding; nucleus; regulation of transcription, DNA	AT1G28310	NA	NA	Dof-type zinc finger DNA-binding family protein Dof-type zinc finger DNA-binding family protein	Potri.011G055600; Potri.011G054300; Potri.004G046600; Potri.004G046100
OG0000039	OG0000039_207	0.00995215	Potra2n11c23311	Bpev01.c0030.g0036.m0001	FUN_032079-T1	PA_chr09_G001556	PS_chr09_G038070	PS_chr02_G006060	GO:0003677; GO:0005634; GO:0006355	DNA binding; nucleus; regulation of transcription, DNA	AT1G28310	NA	NA	Dof-type zinc finger DNA-binding family protein Dof-type zinc finger DNA-binding family protein	Potri.011G055600; Potri.011G054300; Potri.004G046600; Potri.004G046100
OG0000039	OG0000039_209	0.000982883	Potra2n11c23311	Bpev01.c0896.g0007.m0001	FUN_025419-T1	PA_chr09_G001556	PS_chr09_G038070	PS_chr02_G006060	GO:0003677; GO:0005634; GO:0006355	DNA binding; nucleus; regulation of transcription, DNA	AT1G28310	NA	NA	Dof-type zinc finger DNA-binding family protein Dof-type zinc finger DNA-binding family protein	Potri.011G055600; Potri.011G054300; Potri.004G046600; Potri.004G046100
OG0000039	OG0000039_210	0.00356635	Potra2n11c23311	Bpev01.c0896.g0007.m0001	FUN_026351-T1	PA_chr09_G001556	PS_chr09_G038070	PS_chr02_G006060	GO:0003677; GO:0005634; GO:0006355	DNA binding; nucleus; regulation of transcription, DNA	AT1G28310	NA	NA	Dof-type zinc finger DNA-binding family protein Dof-type zinc finger DNA-binding family protein	Potri.011G055600; Potri.011G054300; Potri.004G046600; Potri.004G046100
OG0000039	OG0000039_211	0.00389472	Potra2n11c23311	Bpev01.c0896.g0007.m0001	FUN_031978-T1	PA_chr09_G001556	PS_chr09_G038070	PS_chr02_G006060	GO:0003677; GO:0005634; GO:0006355	DNA binding; nucleus; regulation of transcription, DNA	AT1G28310	NA	NA	Dof-type zinc finger DNA-binding family protein Dof-type zinc finger DNA-binding family protein	Potri.011G055600; Potri.011G054300; Potri.004G046600; Potri.004G046100
OG0000039	OG0000039_212	0.0140017	Potra2n11c23311	Bpev01.c0896.g0007.m0001	FUN_021863-T1	PA_chr09_G001556	PS_chr09_G038070	PS_chr02_G006060	GO:0003677; GO:0005634; GO:0006355	DNA binding; nucleus; regulation of transcription, DNA	AT1G28310	NA	NA	Dof-type zinc finger DNA-binding family protein Dof-type zinc finger DNA-binding family protein	Potri.011G055600; Potri.011G054300; Potri.004G046600; Potri.004G046100
OG0000039	OG0000039_213	3.04954e-05	Potra2n11c23311	Bpev01.c0896.g0007.m0001	FUN_019322-T1	PA_chr09_G001556	PS_chr09_G038070	PS_chr02_G006060	GO:0003677; GO:0005634; GO:0006355	DNA binding; nucleus; regulation of transcription, DNA	AT1G28310	NA	NA	Dof-type zinc finger DNA-binding family protein Dof-type zinc finger DNA-binding family protein	Potri.011G055600; Potri.011G054300; Potri.004G046600; Potri.004G046100
OG0000039	OG0000039_214	0.00996622	Potra2n11c23311	Bpev01.c0896.g0007.m0001	FUN_032079-T1	PA_chr09_G001556	PS_chr09_G038070	PS_chr02_G006060	GO:0003677; GO:0005634; GO:0006355	DNA binding; nucleus; regulation of transcription, DNA	AT1G28310	NA	NA	Dof-type zinc finger DNA-binding family protein Dof-type zinc finger DNA-binding family protein	Potri.011G055600; Potri.011G054300; Potri.004G046600; Potri.004G046100
OG0000039	OG0000039_216	0.00698563	Potra2n11c23311	Bpev01.c0188.g0017.m0001	FUN_025419-T1	PA_chr09_G001556	PS_chr09_G038070	PS_chr02_G006060	GO:0003677; GO:0005634; GO:0006355	DNA binding; nucleus; regulation of transcription, DNA	AT1G28310	NA	NA	Dof-type zinc finger DNA-binding family protein Dof-type zinc finger DNA-binding family protein	Potri.011G055600; Potri.011G054300; Potri.004G046600; Potri.004G046100
OG0000039	OG0000039_217	0.00699434	Potra2n11c23311	Bpev01.c0188.g0017.m0001	FUN_026351-T1	PA_chr09_G001556	PS_chr09_G038070	PS_chr02_G006060	GO:0003677; GO:0005634; GO:0006355	DNA binding; nucleus; regulation of transcription, DNA	AT1G28310	NA	NA	Dof-type zinc finger DNA-binding family protein Dof-type zinc finger DNA-binding family protein	Potri.011G055600; Potri.011G054300; Potri.004G046600; Potri.004G046100
OG0000039	OG0000039_218	0.00703662	Potra2n11c23311	Bpev01.c0188.g0017.m0001	FUN_031978-T1	PA_chr09_G001556	PS_chr09_G038070	PS_chr02_G006060	GO:0003677; GO:0005634; GO:0006355	DNA binding; nucleus; regulation of transcription, DNA	AT1G28310	NA	NA	Dof-type zinc finger DNA-binding family protein Dof-type zinc finger DNA-binding family protein	Potri.011G055600; Potri.011G054300; Potri.004G046600; Potri.004G046100
OG0000039	OG0000039_219	0.00722661	Potra2n11c23311	Bpev01.c0188.g0017.m0001	FUN_019322-T1	PA_chr09_G001556	PS_chr09_G038070	PS_chr02_G006060	GO:0003677; GO:0005634; GO:0006355	DNA binding; nucleus; regulation of transcription, DNA	AT1G28310	NA	NA	Dof-type zinc finger DNA-binding family protein Dof-type zinc finger DNA-binding family protein	Potri.011G055600; Potri.011G054300; Potri.004G046600; Potri.004G046100
OG0000039	OG0000039_220	0.0209689	Potra2n11c23311	Bpev01.c0188.g0017.m0001	FUN_021863-T1	PA_chr09_G001556	PS_chr09_G038070	PS_chr02_G006060	GO:0003677; GO:0005634; GO:0006355	DNA binding; nucleus; regulation of transcription, DNA	AT1G28310	NA	NA	Dof-type zinc finger DNA-binding family protein Dof-type zinc finger DNA-binding family protein	Potri.011G055600; Potri.011G054300; Potri.004G046600; Potri.004G046100
OG0000039	OG0000039_221	0.00913054	Potra2n11c23311	Bpev01.c0188.g0017.m0001	FUN_032079-T1	PA_chr09_G001556	PS_chr09_G038070	PS_chr02_G006060	GO:0003677; GO:0005634; GO:0006355	DNA binding; nucleus; regulation of transcription, DNA	AT1G28310	NA	NA	Dof-type zinc finger DNA-binding family protein Dof-type zinc finger DNA-binding family protein	Potri.011G055600; Potri.011G054300; Potri.004G046600; Potri.004G046100
OG0000039	OG0000039_222	0.00698594	Potra2n11c23311	Bpev01.c0188.g0017.m0001	FUN_013010-T1	PA_chr09_G001556	PS_chr09_G038070	PS_chr02_G006060	GO:0003677; GO:0005634; GO:0006355	DNA binding; nucleus; regulation of transcription, DNA	AT1G28310	NA	NA	Dof-type zinc finger DNA-binding family protein Dof-type zinc finger DNA-binding family protein	Potri.011G055600; Potri.011G054300; Potri.004G046600; Potri.004G046100
OG0000039	OG0000039_223	0.00281662	Potra2n11c23311	Bpev01.c0155.g0052.m0001	FUN_025419-T1	PA_chr09_G001556	PS_chr09_G038070	PS_chr02_G006060	GO:0003677; GO:0005634; GO:0006355	DNA binding; nucleus; regulation of transcription, DNA	AT1G28310	NA	NA	Dof-type zinc finger DNA-binding family protein Dof-type zinc finger DNA-binding family protein	Potri.011G055600; Potri.011G054300; Potri.004G046600; Potri.004G046100
OG0000039	OG0000039_224	0.00503341	Potra2n11c23311	Bpev01.c0155.g0052.m0001	FUN_026351-T1	PA_chr09_G001556	PS_chr09_G038070	PS_chr02_G006060	GO:0003677; GO:0005634; GO:0006355	DNA binding; nucleus; regulation of transcription, DNA	AT1G28310	NA	NA	Dof-type zinc finger DNA-binding family protein Dof-type zinc finger DNA-binding family protein	Potri.011G055600; Potri.011G054300; Potri.004G046600; Potri.004G046100
OG0000039	OG0000039_225	0.000886017	Potra2n11c23311	Bpev01.c0155.g0052.m0001	FUN_031978-T1	PA_chr09_G001556	PS_chr09_G038070	PS_chr02_G006060	GO:0003677; GO:0005634; GO:0006355	DNA binding; nucleus; regulation of transcription, DNA	AT1G28310	NA	NA	Dof-type zinc finger DNA-binding family protein Dof-type zinc finger DNA-binding family protein	Potri.011G055600; Potri.011G054300; Potri.004G046600; Potri.004G046100
OG0000039	OG0000039_226	0.0152433	Potra2n11c23311	Bpev01.c0155.g0052.m0001	FUN_021863-T1	PA_chr09_G001556	PS_chr09_G038070	PS_chr02_G006060	GO:0003677; GO:0005634; GO:0006355	DNA binding; nucleus; regulation of transcription, DNA	AT1G28310	NA	NA	Dof-type zinc finger DNA-binding family protein Dof-type zinc finger DNA-binding family protein	Potri.011G055600; Potri.011G054300; Potri.004G046600; Potri.004G046100
OG0000039	OG0000039_227	0.00103435	Potra2n11c23311	Bpev01.c0155.g0052.m0001	FUN_019322-T1	PA_chr09_G001556	PS_chr09_G038070	PS_chr02_G006060	GO:0003677; GO:0005634; GO:0006355	DNA binding; nucleus; regulation of transcription, DNA	AT1G28310	NA	NA	Dof-type zinc finger DNA-binding family protein Dof-type zinc finger DNA-binding family protein	Potri.011G055600; Potri.011G054300; Potri.004G046600; Potri.004G046100
OG0000039	OG0000039_228	0.00311328	Potra2n11c23311	Bpev01.c0155.g0052.m0001	FUN_032079-T1	PA_chr09_G001556	PS_chr09_G038070	PS_chr02_G006060	GO:0003677; GO:0005634; GO:0006355	DNA binding; nucleus; regulation of transcription, DNA	AT1G28310	NA	NA	Dof-type zinc finger DNA-binding family protein Dof-type zinc finger DNA-binding family protein	Potri.011G055600; Potri.011G054300; Potri.004G046600; Potri.004G046100
OG0000039	OG0000039_229	0.000833549	Potra2n11c23311	Bpev01.c0155.g0052.m0001	FUN_013010-T1	PA_chr09_G001556	PS_chr09_G038070	PS_chr02_G006060	GO:0003677; GO:0005634; GO:0006355	DNA binding; nucleus; regulation of transcription, DNA	AT1G28310	NA	NA	Dof-type zinc finger DNA-binding family protein Dof-type zinc finger DNA-binding family protein	Potri.011G055600; Potri.011G054300; Potri.004G046600; Potri.004G046100
OG0000039	OG0000039_230	0.00258824	Potra2n11c23311	Bpev01.c0618.g0004.m0001	FUN_019322-T1	PA_chr09_G001556	PS_chr09_G038070	PS_chr02_G006060	GO:0003677; GO:0005634; GO:0006355	DNA binding; nucleus; regulation of transcription, DNA	AT1G28310	NA	NA	Dof-type zinc finger DNA-binding family protein Dof-type zinc finger DNA-binding family protein	Potri.011G055600; Potri.011G054300; Potri.004G046600; Potri.004G046100
OG0000039	OG0000039_232	0.0027488	Potra2n11c23311	Bpev01.c0618.g0004.m0001	FUN_025419-T1	PA_chr09_G001556	PS_chr09_G038070	PS_chr02_G006060	GO:0003677; GO:0005634; GO:0006355	DNA binding; nucleus; regulation of transcription, DNA	AT1G28310	NA	NA	Dof-type zinc finger DNA-binding family protein Dof-type zinc finger DNA-binding family protein	Potri.011G055600; Potri.011G054300; Potri.004G046600; Potri.004G046100
OG0000039	OG0000039_233	0.00257494	Potra2n11c23311	Bpev01.c0618.g0004.m0001	FUN_026351-T1	PA_chr09_G001556	PS_chr09_G038070	PS_chr02_G006060	GO:0003677; GO:0005634; GO:0006355	DNA binding; nucleus; regulation of transcription, DNA	AT1G28310	NA	NA	Dof-type zinc finger DNA-binding family protein Dof-type zinc finger DNA-binding family protein	Potri.011G055600; Potri.011G054300; Potri.004G046600; Potri.004G046100
OG0000039	OG0000039_234	0.0120198	Potra2n11c23311	Bpev01.c0618.g0004.m0001	FUN_031978-T1	PA_chr09_G001556	PS_chr09_G038070	PS_chr02_G006060	GO:0003677; GO:0005634; GO:0006355	DNA binding; nucleus; regulation of transcription, DNA	AT1G28310	NA	NA	Dof-type zinc finger DNA-binding family protein Dof-type zinc finger DNA-binding family protein	Potri.011G055600; Potri.011G054300; Potri.004G046600; Potri.004G046100
OG0000039	OG0000039_236	0.00746487	Potra2n11c23311	Bpev01.c0962.g0013.m0001	FUN_019322-T1	PA_chr09_G001556	PS_chr09_G038070	PS_chr02_G006060	GO:0003677; GO:0005634; GO:0006355	DNA binding; nucleus; regulation of transcription, DNA	AT1G28310	NA	NA	Dof-type zinc finger DNA-binding family protein Dof-type zinc finger DNA-binding family protein	Potri.011G055600; Potri.011G054300; Potri.004G046600; Potri.004G046100
OG0000039	OG0000039_237	0.00231197	Potra2n11c23311	Bpev01.c0962.g0013.m0001	FUN_032079-T1	PA_chr09_G001556	PS_chr09_G038070	PS_chr02_G006060	GO:0003677; GO:0005634; GO:0006355	DNA binding; nucleus; regulation of transcription, DNA	AT1G28310	NA	NA	Dof-type zinc finger DNA-binding family protein Dof-type zinc finger DNA-binding family protein	Potri.011G055600; Potri.011G054300; Potri.004G046600; Potri.004G046100
OG0000039	OG0000039_238	0.00425213	Potra2n11c23311	Bpev01.c0962.g0013.m0001	FUN_025419-T1	PA_chr09_G001556	PS_chr09_G038070	PS_chr02_G006060	GO:0003677; GO:0005634; GO:0006355	DNA binding; nucleus; regulation of transcription, DNA	AT1G28310	NA	NA	Dof-type zinc finger DNA-binding family protein Dof-type zinc finger DNA-binding family protein	Potri.011G055600; Potri.011G054300; Potri.004G046600; Potri.004G046100
OG0000039	OG0000039_239	2.65987e-06	Potra2n11c23311	Bpev01.c0962.g0013.m0001	FUN_026351-T1	PA_chr09_G001556	PS_chr09_G038070	PS_chr02_G006060	GO:0003677; GO:0005634; GO:0006355	DNA binding; nucleus; regulation of transcription, DNA	AT1G28310	NA	NA	Dof-type zinc finger DNA-binding family protein Dof-type zinc finger DNA-binding family protein	Potri.011G055600; Potri.011G054300; Potri.004G046600; Potri.004G046100
OG0000039	OG0000039_240	6.25e-05	Potra2n11c23311	Bpev01.c0962.g0013.m0001	FUN_031978-T1	PA_chr09_G001556	PS_chr09_G038070	PS_chr02_G006060	GO:0003677; GO:0005634; GO:0006355	DNA binding; nucleus; regulation of transcription, DNA	AT1G28310	NA	NA	Dof-type zinc finger DNA-binding family protein Dof-type zinc finger DNA-binding family protein	Potri.011G055600; Potri.011G054300; Potri.004G046600; Potri.004G046100
OG0000039	OG0000039_241	2.36333e-06	Potra2n11c23311	Bpev01.c0962.g0013.m0001	FUN_013010-T1	PA_chr09_G001556	PS_chr09_G038070	PS_chr02_G006060	GO:0003677; GO:0005634; GO:0006355	DNA binding; nucleus; regulation of transcription, DNA	AT1G28310	NA	NA	Dof-type zinc finger DNA-binding family protein Dof-type zinc finger DNA-binding family protein	Potri.011G055600; Potri.011G054300; Potri.004G046600; Potri.004G046100
OG0000039	OG0000039_242	0.00703168	Potra2n11c23311	Bpev01.c0030.g0036.m0001	FUN_025419-T1	PA_chr09_G001556	PS_chr09_G038070	PS_chr09_G038070	GO:0003677; GO:0005634; GO:0006355	DNA binding; nucleus; regulation of transcription, DNA	AT1G28310	NA	NA	Dof-type zinc finger DNA-binding family protein Dof-type zinc finger DNA-binding family protein	Potri.011G055600; Potri.011G054300; Potri.004G046600; Potri.004G046100
OG0000039	OG0000039_243	0.00333169	Potra2n11c23311	Bpev01.c0030.g0036.m0001	FUN_026351-T1	PA_chr09_G001556	PS_chr09_G038070	PS_chr09_G038070	GO:0003677; GO:0005634; GO:0006355	DNA binding; nucleus; regulation of transcription, DNA	AT1G28310	NA	NA	Dof-type zinc finger DNA-binding family protein Dof-type zinc finger DNA-binding family protein	Potri.011G055600; Potri.011G054300; Potri.004G046600; Potri.004G046100
OG0000039	OG0000039_244	0.0132445	Potra2n11c23311	Bpev01.c0030.g0036.m0001	FUN_031978-T1	PA_chr09_G001556	PS_chr09_G038070	PS_chr09_G038070	GO:0003677; GO:0005634; GO:0006355	DNA binding; nucleus; regulation of transcription, DNA	AT1G28310	NA	NA	Dof-type zinc finger DNA-binding family protein Dof-type zinc finger DNA-binding family protein	Potri.011G055600; Potri.011G054300; Potri.004G046600; Potri.004G046100
OG0000039	OG0000039_245	0.000496705	Potra2n11c23311	Bpev01.c0030.g0036.m0001	FUN_021863-T1	PA_chr09_G001556	PS_chr09_G038070	PS_chr09_G038070	GO:0003677; GO:0005634; GO:0006355	DNA binding; nucleus; regulation of transcription, DNA	AT1G28310	NA	NA	Dof-type zinc finger DNA-binding family protein Dof-type zinc finger DNA-binding family protein	Potri.011G055600; Potri.011G054300; Potri.004G046600; Potri.004G046100
OG0000039	OG0000039_246	0.000250152	Potra2n11c23311	Bpev01.c0030.g0036.m0001	FUN_019322-T1	PA_chr09_G001556	PS_chr09_G038070	PS_chr09_G038070	GO:0003677; GO:0005634; GO:0006355	DNA binding; nucleus; regulation of transcription, DNA	AT1G28310	NA	NA	Dof-type zinc finger DNA-binding family protein Dof-type zinc finger DNA-binding family protein	Potri.011G055600; Potri.011G054300; Potri.004G046600; Potri.004G046100
OG0000039	OG0000039_247	0.00817765	Potra2n11c23311	Bpev01.c0030.g0036.m0001	FUN_032079-T1	PA_chr09_G001556	PS_chr09_G038070	PS_chr09_G038070	GO:0003677; GO:0005634; GO:0006355	DNA binding; nucleus; regulation of transcription, DNA	AT1G28310	NA	NA	Dof-type zinc finger DNA-binding family protein Dof-type zinc finger DNA-binding family protein	Potri.011G055600; Potri.011G054300; Potri.004G046600; Potri.004G046100
OG0000039	OG0000039_249	0.00122908	Potra2n11c23311	Bpev01.c0896.g0007.m0001	FUN_025419-T1	PA_chr09_G001556	PS_chr09_G038070	PS_chr09_G038070	GO:0003677; GO:0005634; GO:0006355	DNA binding; nucleus; regulation of transcription, DNA	AT1G28310	NA	NA	Dof-type zinc finger DNA-binding family protein Dof-type zinc finger DNA-binding family protein	Potri.011G055600; Potri.011G054300; Potri.004G046600; Potri.004G046100
OG0000039	OG0000039_250	0.00381243	Potra2n11c23311	Bpev01.c0896.g0007.m0001	FUN_026351-T1	PA_chr09_G001556	PS_chr09_G038070	PS_chr09_G038070	GO:0003677; GO:0005634; GO:0006355	DNA binding; nucleus; regulation of transcription, DNA	AT1G28310	NA	NA	Dof-type zinc finger DNA-binding family protein Dof-type zinc finger DNA-binding family protein	Potri.011G055600; Potri.011G054300; Potri.004G046600; Potri.004G046100
OG0000039	OG0000039_251	0.00410277	Potra2n11c23311	Bpev01.c0896.g0007.m0001	FUN_031978-T1	PA_chr09_G001556	PS_chr09_G038070	PS_chr09_G038070	GO:0003677; GO:0005634; GO:0006355	DNA binding; nucleus; regulation of transcription, DNA	AT1G28310	NA	NA	Dof-type zinc finger DNA-binding family protein Dof-type zinc finger DNA-binding family protein	Potri.011G055600; Potri.011G054300; Potri.004G046600; Potri.004G046100
OG0000039	OG0000039_252	0.000510776	Potra2n11c23311	Bpev01.c0896.g0007.m0001	FUN_021863-T1	PA_chr09_G001556	PS_chr09_G038070	PS_chr09_G038070	GO:0003677; GO:0005634; GO:0006355	DNA binding; nucleus; regulation of transcription, DNA	AT1G28310	NA	NA	Dof-type zinc finger DNA-binding family protein Dof-type zinc finger DNA-binding family protein	Potri.011G055600; Potri.011G054300; Potri.004G046600; Potri.004G046100
OG0000039	OG0000039_253	0.000264222	Potra2n11c23311	Bpev01.c0896.g0007.m0001	FUN_019322-T1	PA_chr09_G001556	PS_chr09_G038070	PS_chr09_G038070	GO:0003677; GO:0005634; GO:0006355	DNA binding; nucleus; regulation of transcription, DNA	AT1G28310	NA	NA	Dof-type zinc finger DNA-binding family protein Dof-type zinc finger DNA-binding family protein	Potri.011G055600; Potri.011G054300; Potri.004G046600; Potri.004G046100
OG0000039	OG0000039_254	0.00819172	Potra2n11c23311	Bpev01.c0896.g0007.m0001	FUN_032079-T1	PA_chr09_G001556	PS_chr09_G038070	PS_chr09_G038070	GO:0003677; GO:0005634; GO:0006355	DNA binding; nucleus; regulation of transcription, DNA	AT1G28310	NA	NA	Dof-type zinc finger DNA-binding family protein Dof-type zinc finger DNA-binding family protein	Potri.011G055600; Potri.011G054300; Potri.004G046600; Potri.004G046100
OG0000039	OG0000039_256	0.00723183	Potra2n11c23311	Bpev01.c0188.g0017.m0001	FUN_025419-T1	PA_chr09_G001556	PS_chr09_G038070	PS_chr09_G038070	GO:0003677; GO:0005634; GO:0006355	DNA binding; nucleus; regulation of transcription, DNA	AT1G28310	NA	NA	Dof-type zinc finger DNA-binding family protein Dof-type zinc finger DNA-binding family protein	Potri.011G055600; Potri.011G054300; Potri.004G046600; Potri.004G046100
OG0000039	OG0000039_257	0.00724041	Potra2n11c23311	Bpev01.c0188.g0017.m0001	FUN_026351-T1	PA_chr09_G001556	PS_chr09_G038070	PS_chr09_G038070	GO:0003677; GO:0005634; GO:0006355	DNA binding; nucleus; regulation of transcription, DNA	AT1G28310	NA	NA	Dof-type zinc finger DNA-binding family protein Dof-type zinc finger DNA-binding family protein	Potri.011G055600; Potri.011G054300; Potri.004G046600; Potri.004G046100
OG0000039	OG0000039_258	0.00724467	Potra2n11c23311	Bpev01.c0188.g0017.m0001	FUN_031978-T1	PA_chr09_G001556	PS_chr09_G038070	PS_chr09_G038070	GO:0003677; GO:0005634; GO:0006355	DNA binding; nucleus; regulation of transcription, DNA	AT1G28310	NA	NA	Dof-type zinc finger DNA-binding family protein Dof-type zinc finger DNA-binding family protein	Potri.011G055600; Potri.011G054300; Potri.004G046600; Potri.004G046100
OG0000039	OG0000039_259	0.00746033	Potra2n11c23311	Bpev01.c0188.g0017.m0001	FUN_019322-T1	PA_chr09_G001556	PS_chr09_G038070	PS_chr09_G038070	GO:0003677; GO:0005634; GO:0006355	DNA binding; nucleus; regulation of transcription, DNA	AT1G28310	NA	NA	Dof-type zinc finger DNA-binding family protein Dof-type zinc finger DNA-binding family protein	Potri.011G055600; Potri.011G054300; Potri.004G046600; Potri.004G046100
OG0000039	OG0000039_260	0.00723183	Potra2n11c23311	Bpev01.c0188.g0017.m0001	FUN_021863-T1	PA_chr09_G001556	PS_chr09_G038070	PS_chr09_G038070	GO:0003677; GO:0005634; GO:0006355	DNA binding; nucleus; regulation of transcription, DNA	AT1G28310	NA	NA	Dof-type zinc finger DNA-binding family protein Dof-type zinc finger DNA-binding family protein	Potri.011G055600; Potri.011G054300; Potri.004G046600; Potri.004G046100
OG0000039	OG0000039_261	0.00735604	Potra2n11c23311	Bpev01.c0188.g0017.m0001	FUN_032079-T1	PA_chr09_G001556	PS_chr09_G038070	PS_chr09_G038070	GO:0003677; GO:0005634; GO:0006355	DNA binding; nucleus; regulation of transcription, DNA	AT1G28310	NA	NA	Dof-type zinc finger DNA-binding family protein Dof-type zinc finger DNA-binding family protein	Potri.011G055600; Potri.011G054300; Potri.004G046600; Potri.004G046100
OG0000039	OG0000039_262	0.00730691	Potra2n11c23311	Bpev01.c0188.g0017.m0001	FUN_013010-T1	PA_chr09_G001556	PS_chr09_G038070	PS_chr09_G038070	GO:0003677; GO:0005634; GO:0006355	DNA binding; nucleus; regulation of transcription, DNA	AT1G28310	NA	NA	Dof-type zinc finger DNA-binding family protein Dof-type zinc finger DNA-binding family protein	Potri.011G055600; Potri.011G054300; Potri.004G046600; Potri.004G046100
OG0000039	OG0000039_263	0.00306282	Potra2n11c23311	Bpev01.c0155.g0052.m0001	FUN_025419-T1	PA_chr09_G001556	PS_chr09_G038070	PS_chr09_G038070	GO:0003677; GO:0005634; GO:0006355	DNA binding; nucleus; regulation of transcription, DNA	AT1G28310	NA	NA	Dof-type zinc finger DNA-binding family protein Dof-type zinc finger DNA-binding family protein	Potri.011G055600; Potri.011G054300; Potri.004G046600; Potri.004G046100
OG0000039	OG0000039_264	0.00527949	Potra2n11c23311	Bpev01.c0155.g0052.m0001	FUN_026351-T1	PA_chr09_G001556	PS_chr09_G038070	PS_chr09_G038070	GO:0003677; GO:0005634; GO:0006355	DNA binding; nucleus; regulation of transcription, DNA	AT1G28310	NA	NA	Dof-type zinc finger DNA-binding family protein Dof-type zinc finger DNA-binding family protein	Potri.011G055600; Potri.011G054300; Potri.004G046600; Potri.004G046100
OG0000039	OG0000039_265	0.00109407	Potra2n11c23311	Bpev01.c0155.g0052.m0001	FUN_031978-T1	PA_chr09_G001556	PS_chr09_G038070	PS_chr09_G038070	GO:0003677; GO:0005634; GO:0006355	DNA binding; nucleus; regulation of transcription, DNA	AT1G28310	NA	NA	Dof-type zinc finger DNA-binding family protein Dof-type zinc finger DNA-binding family protein	Potri.011G055600; Potri.011G054300; Potri.004G046600; Potri.004G046100
OG0000039	OG0000039_266	0.00150618	Potra2n11c23311	Bpev01.c0155.g0052.m0001	FUN_021863-T1	PA_chr09_G001556	PS_chr09_G038070	PS_chr09_G038070	GO:0003677; GO:0005634; GO:0006355	DNA binding; nucleus; regulation of transcription, DNA	AT1G28310	NA	NA	Dof-type zinc finger DNA-binding family protein Dof-type zinc finger DNA-binding family protein	Potri.011G055600; Potri.011G054300; Potri.004G046600; Potri.004G046100
OG0000039	OG0000039_267	0.00126808	Potra2n11c23311	Bpev01.c0155.g0052.m0001	FUN_019322-T1	PA_chr09_G001556	PS_chr09_G038070	PS_chr09_G038070	GO:0003677; GO:0005634; GO:0006355	DNA binding; nucleus; regulation of transcription, DNA	AT1G28310	NA	NA	Dof-type zinc finger DNA-binding family protein Dof-type zinc finger DNA-binding family protein	Potri.011G055600; Potri.011G054300; Potri.004G046600; Potri.004G046100
OG0000039	OG0000039_268	0.00133878	Potra2n11c23311	Bpev01.c0155.g0052.m0001	FUN_032079-T1	PA_chr09_G001556	PS_chr09_G038070	PS_chr09_G038070	GO:0003677; GO:0005634; GO:0006355	DNA binding; nucleus; regulation of transcription, DNA	AT1G28310	NA	NA	Dof-type zinc finger DNA-binding family protein Dof-type zinc finger DNA-binding family protein	Potri.011G055600; Potri.011G054300; Potri.004G046600; Potri.004G046100
OG0000039	OG0000039_269	0.00115448	Potra2n11c23311	Bpev01.c0155.g0052.m0001	FUN_013010-T1	PA_chr09_G001556	PS_chr09_G038070	PS_chr09_G038070	GO:0003677; GO:0005634; GO:0006355	DNA binding; nucleus; regulation of transcription, DNA	AT1G28310	NA	NA	Dof-type zinc finger DNA-binding family protein Dof-type zinc finger DNA-binding family protein	Potri.011G055600; Potri.011G054300; Potri.004G046600; Potri.004G046100
OG0000039	OG0000039_270	0.00915014	Potra2n11c23311	Bpev01.c0618.g0004.m0001	FUN_019322-T1	PA_chr09_G001556	PS_chr09_G038070	PS_chr09_G038070	GO:0003677; GO:0005634; GO:0006355	DNA binding; nucleus; regulation of transcription, DNA	AT1G28310	NA	NA	Dof-type zinc finger DNA-binding family protein Dof-type zinc finger DNA-binding family protein	Potri.011G055600; Potri.011G054300; Potri.004G046600; Potri.004G046100
OG0000039	OG0000039_271	0.0170776	Potra2n11c23311	Bpev01.c0618.g0004.m0001	FUN_032079-T1	PA_chr09_G001556	PS_chr09_G038070	PS_chr09_G038070	GO:0003677; GO:0005634; GO:0006355	DNA binding; nucleus; regulation of transcription, DNA	AT1G28310	NA	NA	Dof-type zinc finger DNA-binding family protein Dof-type zinc finger DNA-binding family protein	Potri.011G055600; Potri.011G054300; Potri.004G046600; Potri.004G046100
OG0000039	OG0000039_272	0.002995	Potra2n11c23311	Bpev01.c0618.g0004.m0001	FUN_025419-T1	PA_chr09_G001556	PS_chr09_G038070	PS_chr09_G038070	GO:0003677; GO:0005634; GO:0006355	DNA binding; nucleus; regulation of transcription, DNA	AT1G28310	NA	NA	Dof-type zinc finger DNA-binding family protein Dof-type zinc finger DNA-binding family protein	Potri.011G055600; Potri.011G054300; Potri.004G046600; Potri.004G046100
OG0000039	OG0000039_273	0.00282101	Potra2n11c23311	Bpev01.c0618.g0004.m0001	FUN_026351-T1	PA_chr09_G001556	PS_chr09_G038070	PS_chr09_G038070	GO:0003677; GO:0005634; GO:0006355	DNA binding; nucleus; regulation of transcription, DNA	AT1G28310	NA	NA	Dof-type zinc finger DNA-binding family protein Dof-type zinc finger DNA-binding family protein	Potri.011G055600; Potri.011G054300; Potri.004G046600; Potri.004G046100
OG0000039	OG0000039_274	0.0122279	Potra2n11c23311	Bpev01.c0618.g0004.m0001	FUN_031978-T1	PA_chr09_G001556	PS_chr09_G038070	PS_chr09_G038070	GO:0003677; GO:0005634; GO:0006355	DNA binding; nucleus; regulation of transcription, DNA	AT1G28310	NA	NA	Dof-type zinc finger DNA-binding family protein Dof-type zinc finger DNA-binding family protein	Potri.011G055600; Potri.011G054300; Potri.004G046600; Potri.004G046100
OG0000039	OG0000039_276	0.00769859	Potra2n11c23311	Bpev01.c0962.g0013.m0001	FUN_019322-T1	PA_chr09_G001556	PS_chr09_G038070	PS_chr09_G038070	GO:0003677; GO:0005634; GO:0006355	DNA binding; nucleus; regulation of transcription, DNA	AT1G28310	NA	NA	Dof-type zinc finger DNA-binding family protein Dof-type zinc finger DNA-binding family protein	Potri.011G055600; Potri.011G054300; Potri.004G046600; Potri.004G046100
OG0000039	OG0000039_277	0.00853847	Potra2n11c23311	Bpev01.c0962.g0013.m0001	FUN_032079-T1	PA_chr09_G001556	PS_chr09_G038070	PS_chr09_G038070	GO:0003677; GO:0005634; GO:0006355	DNA binding; nucleus; regulation of transcription, DNA	AT1G28310	NA	NA	Dof-type zinc finger DNA-binding family protein Dof-type zinc finger DNA-binding family protein	Potri.011G055600; Potri.011G054300; Potri.004G046600; Potri.004G046100
OG0000039	OG0000039_278	0.00449833	Potra2n11c23311	Bpev01.c0962.g0013.m0001	FUN_025419-T1	PA_chr09_G001556	PS_chr09_G038070	PS_chr09_G038070	GO:0003677; GO:0005634; GO:0006355	DNA binding; nucleus; regulation of transcription, DNA	AT1G28310	NA	NA	Dof-type zinc finger DNA-binding family protein Dof-type zinc finger DNA-binding family protein	Potri.011G055600; Potri.011G054300; Potri.004G046600; Potri.004G046100
OG0000039	OG0000039_279	0.000248735	Potra2n11c23311	Bpev01.c0962.g0013.m0001	FUN_026351-T1	PA_chr09_G001556	PS_chr09_G038070	PS_chr09_G038070	GO:0003677; GO:0005634; GO:0006355	DNA binding; nucleus; regulation of transcription, DNA	AT1G28310	NA	NA	Dof-type zinc finger DNA-binding family protein Dof-type zinc finger DNA-binding family protein	Potri.011G055600; Potri.011G054300; Potri.004G046600; Potri.004G046100
OG0000039	OG0000039_280	0.00027055	Potra2n11c23311	Bpev01.c0962.g0013.m0001	FUN_031978-T1	PA_chr09_G001556	PS_chr09_G038070	PS_chr09_G038070	GO:0003677; GO:0005634; GO:0006355	DNA binding; nucleus; regulation of transcription, DNA	AT1G28310	NA	NA	Dof-type zinc finger DNA-binding family protein Dof-type zinc finger DNA-binding family protein	Potri.011G055600; Potri.011G054300; Potri.004G046600; Potri.004G046100
OG0000039	OG0000039_281	0.000323333	Potra2n11c23311	Bpev01.c0962.g0013.m0001	FUN_013010-T1	PA_chr09_G001556	PS_chr09_G038070	PS_chr09_G038070	GO:0003677; GO:0005634; GO:0006355	DNA binding; nucleus; regulation of transcription, DNA	AT1G28310	NA	NA	Dof-type zinc finger DNA-binding family protein Dof-type zinc finger DNA-binding family protein	Potri.011G055600; Potri.011G054300; Potri.004G046600; Potri.004G046100
OG0000039	OG0000039_282	0.00740697	Potra2n11c23311	Bpev01.c0188.g0017.m0001	FUN_025419-T1	PA_chr09_G001556	PS_chr09_G038070	PS_chr08_G035003	GO:0003677; GO:0005634; GO:0006355	DNA binding; nucleus; regulation of transcription, DNA	AT1G28310	NA	NA	Dof-type zinc finger DNA-binding family protein Dof-type zinc finger DNA-binding family protein	Potri.011G055600; Potri.011G054300; Potri.004G046600; Potri.004G046100
OG0000039	OG0000039_283	0.0101654	Potra2n11c23311	Bpev01.c0188.g0017.m0001	FUN_026351-T1	PA_chr09_G001556	PS_chr09_G038070	PS_chr08_G035003	GO:0003677; GO:0005634; GO:0006355	DNA binding; nucleus; regulation of transcription, DNA	AT1G28310	NA	NA	Dof-type zinc finger DNA-binding family protein Dof-type zinc finger DNA-binding family protein	Potri.011G055600; Potri.011G054300; Potri.004G046600; Potri.004G046100
OG0000039	OG0000039_284	0.00982348	Potra2n11c23311	Bpev01.c0188.g0017.m0001	FUN_031978-T1	PA_chr09_G001556	PS_chr09_G038070	PS_chr08_G035003	GO:0003677; GO:0005634; GO:0006355	DNA binding; nucleus; regulation of transcription, DNA	AT1G28310	NA	NA	Dof-type zinc finger DNA-binding family protein Dof-type zinc finger DNA-binding family protein	Potri.011G055600; Potri.011G054300; Potri.004G046600; Potri.004G046100
OG0000039	OG0000039_285	0.00763507	Potra2n11c23311	Bpev01.c0188.g0017.m0001	FUN_019322-T1	PA_chr09_G001556	PS_chr09_G038070	PS_chr08_G035003	GO:0003677; GO:0005634; GO:0006355	DNA binding; nucleus; regulation of transcription, DNA	AT1G28310	NA	NA	Dof-type zinc finger DNA-binding family protein Dof-type zinc finger DNA-binding family protein	Potri.011G055600; Potri.011G054300; Potri.004G046600; Potri.004G046100
OG0000039	OG0000039_286	0.0235567	Potra2n11c23311	Bpev01.c0188.g0017.m0001	FUN_021863-T1	PA_chr09_G001556	PS_chr09_G038070	PS_chr08_G035003	GO:0003677; GO:0005634; GO:0006355	DNA binding; nucleus; regulation of transcription, DNA	AT1G28310	NA	NA	Dof-type zinc finger DNA-binding family protein Dof-type zinc finger DNA-binding family protein	Potri.011G055600; Potri.011G054300; Potri.004G046600; Potri.004G046100
OG0000039	OG0000039_287	0.00751987	Potra2n11c23311	Bpev01.c0188.g0017.m0001	FUN_032079-T1	PA_chr09_G001556	PS_chr09_G038070	PS_chr08_G035003	GO:0003677; GO:0005634; GO:0006355	DNA binding; nucleus; regulation of transcription, DNA	AT1G28310	NA	NA	Dof-type zinc finger DNA-binding family protein Dof-type zinc finger DNA-binding family protein	Potri.011G055600; Potri.011G054300; Potri.004G046600; Potri.004G046100
OG0000039	OG0000039_288	0.00740691	Potra2n11c23311	Bpev01.c0188.g0017.m0001	FUN_013010-T1	PA_chr09_G001556	PS_chr09_G038070	PS_chr08_G035003	GO:0003677; GO:0005634; GO:0006355	DNA binding; nucleus; regulation of transcription, DNA	AT1G28310	NA	NA	Dof-type zinc finger DNA-binding family protein Dof-type zinc finger DNA-binding family protein	Potri.011G055600; Potri.011G054300; Potri.004G046600; Potri.004G046100
OG0000039	OG0000039_289	0.00720682	Potra2n11c23311	Bpev01.c0030.g0036.m0001	FUN_025419-T1	PA_chr09_G001556	PS_chr09_G038070	PS_chr08_G035003	GO:0003677; GO:0005634; GO:0006355	DNA binding; nucleus; regulation of transcription, DNA	AT1G28310	NA	NA	Dof-type zinc finger DNA-binding family protein Dof-type zinc finger DNA-binding family protein	Potri.011G055600; Potri.011G054300; Potri.004G046600; Potri.004G046100
OG0000039	OG0000039_290	0.00625669	Potra2n11c23311	Bpev01.c0030.g0036.m0001	FUN_026351-T1	PA_chr09_G001556	PS_chr09_G038070	PS_chr08_G035003	GO:0003677; GO:0005634; GO:0006355	DNA binding; nucleus; regulation of transcription, DNA	AT1G28310	NA	NA	Dof-type zinc finger DNA-binding family protein Dof-type zinc finger DNA-binding family protein	Potri.011G055600; Potri.011G054300; Potri.004G046600; Potri.004G046100
OG0000039	OG0000039_291	0.0158233	Potra2n11c23311	Bpev01.c0030.g0036.m0001	FUN_031978-T1	PA_chr09_G001556	PS_chr09_G038070	PS_chr08_G035003	GO:0003677; GO:0005634; GO:0006355	DNA binding; nucleus; regulation of transcription, DNA	AT1G28310	NA	NA	Dof-type zinc finger DNA-binding family protein Dof-type zinc finger DNA-binding family protein	Potri.011G055600; Potri.011G054300; Potri.004G046600; Potri.004G046100
OG0000039	OG0000039_292	0.000846683	Potra2n11c23311	Bpev01.c0030.g0036.m0001	FUN_021863-T1	PA_chr09_G001556	PS_chr09_G038070	PS_chr08_G035003	GO:0003677; GO:0005634; GO:0006355	DNA binding; nucleus; regulation of transcription, DNA	AT1G28310	NA	NA	Dof-type zinc finger DNA-binding family protein Dof-type zinc finger DNA-binding family protein	Potri.011G055600; Potri.011G054300; Potri.004G046600; Potri.004G046100
OG0000039	OG0000039_293	0.000424892	Potra2n11c23311	Bpev01.c0030.g0036.m0001	FUN_019322-T1	PA_chr09_G001556	PS_chr09_G038070	PS_chr08_G035003	GO:0003677; GO:0005634; GO:0006355	DNA binding; nucleus; regulation of transcription, DNA	AT1G28310	NA	NA	Dof-type zinc finger DNA-binding family protein Dof-type zinc finger DNA-binding family protein	Potri.011G055600; Potri.011G054300; Potri.004G046600; Potri.004G046100
OG0000039	OG0000039_294	0.00834148	Potra2n11c23311	Bpev01.c0030.g0036.m0001	FUN_032079-T1	PA_chr09_G001556	PS_chr09_G038070	PS_chr08_G035003	GO:0003677; GO:0005634; GO:0006355	DNA binding; nucleus; regulation of transcription, DNA	AT1G28310	NA	NA	Dof-type zinc finger DNA-binding family protein Dof-type zinc finger DNA-binding family protein	Potri.011G055600; Potri.011G054300; Potri.004G046600; Potri.004G046100
OG0000039	OG0000039_296	0.00140422	Potra2n11c23311	Bpev01.c0896.g0007.m0001	FUN_025419-T1	PA_chr09_G001556	PS_chr09_G038070	PS_chr08_G035003	GO:0003677; GO:0005634; GO:0006355	DNA binding; nucleus; regulation of transcription, DNA	AT1G28310	NA	NA	Dof-type zinc finger DNA-binding family protein Dof-type zinc finger DNA-binding family protein	Potri.011G055600; Potri.011G054300; Potri.004G046600; Potri.004G046100
OG0000039	OG0000039_297	0.00673742	Potra2n11c23311	Bpev01.c0896.g0007.m0001	FUN_026351-T1	PA_chr09_G001556	PS_chr09_G038070	PS_chr08_G035003	GO:0003677; GO:0005634; GO:0006355	DNA binding; nucleus; regulation of transcription, DNA	AT1G28310	NA	NA	Dof-type zinc finger DNA-binding family protein Dof-type zinc finger DNA-binding family protein	Potri.011G055600; Potri.011G054300; Potri.004G046600; Potri.004G046100
OG0000039	OG0000039_298	0.00668158	Potra2n11c23311	Bpev01.c0896.g0007.m0001	FUN_031978-T1	PA_chr09_G001556	PS_chr09_G038070	PS_chr08_G035003	GO:0003677; GO:0005634; GO:0006355	DNA binding; nucleus; regulation of transcription, DNA	AT1G28310	NA	NA	Dof-type zinc finger DNA-binding family protein Dof-type zinc finger DNA-binding family protein	Potri.011G055600; Potri.011G054300; Potri.004G046600; Potri.004G046100
OG0000039	OG0000039_299	0.000860754	Potra2n11c23311	Bpev01.c0896.g0007.m0001	FUN_021863-T1	PA_chr09_G001556	PS_chr09_G038070	PS_chr08_G035003	GO:0003677; GO:0005634; GO:0006355	DNA binding; nucleus; regulation of transcription, DNA	AT1G28310	NA	NA	Dof-type zinc finger DNA-binding family protein Dof-type zinc finger DNA-binding family protein	Potri.011G055600; Potri.011G054300; Potri.004G046600; Potri.004G046100
OG0000039	OG0000039_300	0.000438962	Potra2n11c23311	Bpev01.c0896.g0007.m0001	FUN_019322-T1	PA_chr09_G001556	PS_chr09_G038070	PS_chr08_G035003	GO:0003677; GO:0005634; GO:0006355	DNA binding; nucleus; regulation of transcription, DNA	AT1G28310	NA	NA	Dof-type zinc finger DNA-binding family protein Dof-type zinc finger DNA-binding family protein	Potri.011G055600; Potri.011G054300; Potri.004G046600; Potri.004G046100
OG0000039	OG0000039_301	0.00835555	Potra2n11c23311	Bpev01.c0896.g0007.m0001	FUN_032079-T1	PA_chr09_G001556	PS_chr09_G038070	PS_chr08_G035003	GO:0003677; GO:0005634; GO:0006355	DNA binding; nucleus; regulation of transcription, DNA	AT1G28310	NA	NA	Dof-type zinc finger DNA-binding family protein Dof-type zinc finger DNA-binding family protein	Potri.011G055600; Potri.011G054300; Potri.004G046600; Potri.004G046100
OG0000039	OG0000039_304	0.00787333	Potra2n11c23311	Bpev01.c0962.g0013.m0001	FUN_019322-T1	PA_chr09_G001556	PS_chr09_G038070	PS_chr08_G035003	GO:0003677; GO:0005634; GO:0006355	DNA binding; nucleus; regulation of transcription, DNA	AT1G28310	NA	NA	Dof-type zinc finger DNA-binding family protein Dof-type zinc finger DNA-binding family protein	Potri.011G055600; Potri.011G054300; Potri.004G046600; Potri.004G046100
OG0000039	OG0000039_305	0.00214896	Potra2n11c23311	Bpev01.c0962.g0013.m0001	FUN_032079-T1	PA_chr09_G001556	PS_chr09_G038070	PS_chr08_G035003	GO:0003677; GO:0005634; GO:0006355	DNA binding; nucleus; regulation of transcription, DNA	AT1G28310	NA	NA	Dof-type zinc finger DNA-binding family protein Dof-type zinc finger DNA-binding family protein	Potri.011G055600; Potri.011G054300; Potri.004G046600; Potri.004G046100
OG0000039	OG0000039_306	0.00467347	Potra2n11c23311	Bpev01.c0962.g0013.m0001	FUN_025419-T1	PA_chr09_G001556	PS_chr09_G038070	PS_chr08_G035003	GO:0003677; GO:0005634; GO:0006355	DNA binding; nucleus; regulation of transcription, DNA	AT1G28310	NA	NA	Dof-type zinc finger DNA-binding family protein Dof-type zinc finger DNA-binding family protein	Potri.011G055600; Potri.011G054300; Potri.004G046600; Potri.004G046100
OG0000039	OG0000039_307	0.00317373	Potra2n11c23311	Bpev01.c0962.g0013.m0001	FUN_026351-T1	PA_chr09_G001556	PS_chr09_G038070	PS_chr08_G035003	GO:0003677; GO:0005634; GO:0006355	DNA binding; nucleus; regulation of transcription, DNA	AT1G28310	NA	NA	Dof-type zinc finger DNA-binding family protein Dof-type zinc finger DNA-binding family protein	Potri.011G055600; Potri.011G054300; Potri.004G046600; Potri.004G046100
OG0000039	OG0000039_308	0.00284937	Potra2n11c23311	Bpev01.c0962.g0013.m0001	FUN_031978-T1	PA_chr09_G001556	PS_chr09_G038070	PS_chr08_G035003	GO:0003677; GO:0005634; GO:0006355	DNA binding; nucleus; regulation of transcription, DNA	AT1G28310	NA	NA	Dof-type zinc finger DNA-binding family protein Dof-type zinc finger DNA-binding family protein	Potri.011G055600; Potri.011G054300; Potri.004G046600; Potri.004G046100
OG0000039	OG0000039_309	0.000423334	Potra2n11c23311	Bpev01.c0962.g0013.m0001	FUN_013010-T1	PA_chr09_G001556	PS_chr09_G038070	PS_chr08_G035003	GO:0003677; GO:0005634; GO:0006355	DNA binding; nucleus; regulation of transcription, DNA	AT1G28310	NA	NA	Dof-type zinc finger DNA-binding family protein Dof-type zinc finger DNA-binding family protein	Potri.011G055600; Potri.011G054300; Potri.004G046600; Potri.004G046100
OG0000039	OG0000039_310	0.00323795	Potra2n11c23311	Bpev01.c0155.g0052.m0001	FUN_025419-T1	PA_chr09_G001556	PS_chr09_G038070	PS_chr08_G035003	GO:0003677; GO:0005634; GO:0006355	DNA binding; nucleus; regulation of transcription, DNA	AT1G28310	NA	NA	Dof-type zinc finger DNA-binding family protein Dof-type zinc finger DNA-binding family protein	Potri.011G055600; Potri.011G054300; Potri.004G046600; Potri.004G046100
OG0000039	OG0000039_311	0.00820448	Potra2n11c23311	Bpev01.c0155.g0052.m0001	FUN_026351-T1	PA_chr09_G001556	PS_chr09_G038070	PS_chr08_G035003	GO:0003677; GO:0005634; GO:0006355	DNA binding; nucleus; regulation of transcription, DNA	AT1G28310	NA	NA	Dof-type zinc finger DNA-binding family protein Dof-type zinc finger DNA-binding family protein	Potri.011G055600; Potri.011G054300; Potri.004G046600; Potri.004G046100
OG0000039	OG0000039_312	0.00367288	Potra2n11c23311	Bpev01.c0155.g0052.m0001	FUN_031978-T1	PA_chr09_G001556	PS_chr09_G038070	PS_chr08_G035003	GO:0003677; GO:0005634; GO:0006355	DNA binding; nucleus; regulation of transcription, DNA	AT1G28310	NA	NA	Dof-type zinc finger DNA-binding family protein Dof-type zinc finger DNA-binding family protein	Potri.011G055600; Potri.011G054300; Potri.004G046600; Potri.004G046100
OG0000039	OG0000039_313	0.00168115	Potra2n11c23311	Bpev01.c0155.g0052.m0001	FUN_021863-T1	PA_chr09_G001556	PS_chr09_G038070	PS_chr08_G035003	GO:0003677; GO:0005634; GO:0006355	DNA binding; nucleus; regulation of transcription, DNA	AT1G28310	NA	NA	Dof-type zinc finger DNA-binding family protein Dof-type zinc finger DNA-binding family protein	Potri.011G055600; Potri.011G054300; Potri.004G046600; Potri.004G046100
OG0000039	OG0000039_314	0.00144282	Potra2n11c23311	Bpev01.c0155.g0052.m0001	FUN_019322-T1	PA_chr09_G001556	PS_chr09_G038070	PS_chr08_G035003	GO:0003677; GO:0005634; GO:0006355	DNA binding; nucleus; regulation of transcription, DNA	AT1G28310	NA	NA	Dof-type zinc finger DNA-binding family protein Dof-type zinc finger DNA-binding family protein	Potri.011G055600; Potri.011G054300; Potri.004G046600; Potri.004G046100
OG0000039	OG0000039_315	0.00150261	Potra2n11c23311	Bpev01.c0155.g0052.m0001	FUN_032079-T1	PA_chr09_G001556	PS_chr09_G038070	PS_chr08_G035003	GO:0003677; GO:0005634; GO:0006355	DNA binding; nucleus; regulation of transcription, DNA	AT1G28310	NA	NA	Dof-type zinc finger DNA-binding family protein Dof-type zinc finger DNA-binding family protein	Potri.011G055600; Potri.011G054300; Potri.004G046600; Potri.004G046100
OG0000039	OG0000039_316	0.0103878	Potra2n11c23311	Bpev01.c0155.g0052.m0001	FUN_013010-T1	PA_chr09_G001556	PS_chr09_G038070	PS_chr08_G035003	GO:0003677; GO:0005634; GO:0006355	DNA binding; nucleus; regulation of transcription, DNA	AT1G28310	NA	NA	Dof-type zinc finger DNA-binding family protein Dof-type zinc finger DNA-binding family protein	Potri.011G055600; Potri.011G054300; Potri.004G046600; Potri.004G046100
OG0000039	OG0000039_317	0.00299671	Potra2n11c23311	Bpev01.c0618.g0004.m0001	FUN_019322-T1	PA_chr09_G001556	PS_chr09_G038070	PS_chr08_G035003	GO:0003677; GO:0005634; GO:0006355	DNA binding; nucleus; regulation of transcription, DNA	AT1G28310	NA	NA	Dof-type zinc finger DNA-binding family protein Dof-type zinc finger DNA-binding family protein	Potri.011G055600; Potri.011G054300; Potri.004G046600; Potri.004G046100
OG0000039	OG0000039_319	0.00317014	Potra2n11c23311	Bpev01.c0618.g0004.m0001	FUN_025419-T1	PA_chr09_G001556	PS_chr09_G038070	PS_chr08_G035003	GO:0003677; GO:0005634; GO:0006355	DNA binding; nucleus; regulation of transcription, DNA	AT1G28310	NA	NA	Dof-type zinc finger DNA-binding family protein Dof-type zinc finger DNA-binding family protein	Potri.011G055600; Potri.011G054300; Potri.004G046600; Potri.004G046100
OG0000039	OG0000039_320	0.00574601	Potra2n11c23311	Bpev01.c0618.g0004.m0001	FUN_026351-T1	PA_chr09_G001556	PS_chr09_G038070	PS_chr08_G035003	GO:0003677; GO:0005634; GO:0006355	DNA binding; nucleus; regulation of transcription, DNA	AT1G28310	NA	NA	Dof-type zinc finger DNA-binding family protein Dof-type zinc finger DNA-binding family protein	Potri.011G055600; Potri.011G054300; Potri.004G046600; Potri.004G046100
OG0000039	OG0000039_321	0.0148067	Potra2n11c23311	Bpev01.c0618.g0004.m0001	FUN_031978-T1	PA_chr09_G001556	PS_chr09_G038070	PS_chr08_G035003	GO:0003677; GO:0005634; GO:0006355	DNA binding; nucleus; regulation of transcription, DNA	AT1G28310	NA	NA	Dof-type zinc finger DNA-binding family protein Dof-type zinc finger DNA-binding family protein	Potri.011G055600; Potri.011G054300; Potri.004G046600; Potri.004G046100
OG0000039	OG0000039_322	0.0114641	Potra2n11c23311	Bpev01.c0896.g0007.m0001	FUN_025419-T1	PA_chr09_G001556	PS_chr09_G038070	PS_chr06_G024657	GO:0003677; GO:0005634; GO:0006355	DNA binding; nucleus; regulation of transcription, DNA	AT1G28310	NA	NA	Dof-type zinc finger DNA-binding family protein Dof-type zinc finger DNA-binding family protein	Potri.011G055600; Potri.011G054300; Potri.004G046600; Potri.004G046100
OG0000039	OG0000039_323	0.0181082	Potra2n11c23311	Bpev01.c0896.g0007.m0001	FUN_031978-T1	PA_chr09_G001556	PS_chr09_G038070	PS_chr06_G024657	GO:0003677; GO:0005634; GO:0006355	DNA binding; nucleus; regulation of transcription, DNA	AT1G28310	NA	NA	Dof-type zinc finger DNA-binding family protein Dof-type zinc finger DNA-binding family protein	Potri.011G055600; Potri.011G054300; Potri.004G046600; Potri.004G046100
OG0000039	OG0000039_324	0.0209822	Potra2n11c23311	Bpev01.c0896.g0007.m0001	FUN_021863-T1	PA_chr09_G001556	PS_chr09_G038070	PS_chr06_G024657	GO:0003677; GO:0005634; GO:0006355	DNA binding; nucleus; regulation of transcription, DNA	AT1G28310	NA	NA	Dof-type zinc finger DNA-binding family protein Dof-type zinc finger DNA-binding family protein	Potri.011G055600; Potri.011G054300; Potri.004G046600; Potri.004G046100
OG0000039	OG0000039_325	0.010499	Potra2n11c23311	Bpev01.c0896.g0007.m0001	FUN_019322-T1	PA_chr09_G001556	PS_chr09_G038070	PS_chr06_G024657	GO:0003677; GO:0005634; GO:0006355	DNA binding; nucleus; regulation of transcription, DNA	AT1G28310	NA	NA	Dof-type zinc finger DNA-binding family protein Dof-type zinc finger DNA-binding family protein	Potri.011G055600; Potri.011G054300; Potri.004G046600; Potri.004G046100
OG0000039	OG0000039_326	0.0184141	Potra2n11c23311	Bpev01.c0896.g0007.m0001	FUN_032079-T1	PA_chr09_G001556	PS_chr09_G038070	PS_chr06_G024657	GO:0003677; GO:0005634; GO:0006355	DNA binding; nucleus; regulation of transcription, DNA	AT1G28310	NA	NA	Dof-type zinc finger DNA-binding family protein Dof-type zinc finger DNA-binding family protein	Potri.011G055600; Potri.011G054300; Potri.004G046600; Potri.004G046100
OG0000039	OG0000039_329	0.0179333	Potra2n11c23311	Bpev01.c0962.g0013.m0001	FUN_019322-T1	PA_chr09_G001556	PS_chr09_G038070	PS_chr06_G024657	GO:0003677; GO:0005634; GO:0006355	DNA binding; nucleus; regulation of transcription, DNA	AT1G28310	NA	NA	Dof-type zinc finger DNA-binding family protein Dof-type zinc finger DNA-binding family protein	Potri.011G055600; Potri.011G054300; Potri.004G046600; Potri.004G046100
OG0000039	OG0000039_330	0.0206109	Potra2n11c23311	Bpev01.c0962.g0013.m0001	FUN_032079-T1	PA_chr09_G001556	PS_chr09_G038070	PS_chr06_G024657	GO:0003677; GO:0005634; GO:0006355	DNA binding; nucleus; regulation of transcription, DNA	AT1G28310	NA	NA	Dof-type zinc finger DNA-binding family protein Dof-type zinc finger DNA-binding family protein	Potri.011G055600; Potri.011G054300; Potri.004G046600; Potri.004G046100
OG0000039	OG0000039_331	0.0147333	Potra2n11c23311	Bpev01.c0962.g0013.m0001	FUN_025419-T1	PA_chr09_G001556	PS_chr09_G038070	PS_chr06_G024657	GO:0003677; GO:0005634; GO:0006355	DNA binding; nucleus; regulation of transcription, DNA	AT1G28310	NA	NA	Dof-type zinc finger DNA-binding family protein Dof-type zinc finger DNA-binding family protein	Potri.011G055600; Potri.011G054300; Potri.004G046600; Potri.004G046100
OG0000039	OG0000039_332	0.0142763	Potra2n11c23311	Bpev01.c0962.g0013.m0001	FUN_031978-T1	PA_chr09_G001556	PS_chr09_G038070	PS_chr06_G024657	GO:0003677; GO:0005634; GO:0006355	DNA binding; nucleus; regulation of transcription, DNA	AT1G28310	NA	NA	Dof-type zinc finger DNA-binding family protein Dof-type zinc finger DNA-binding family protein	Potri.011G055600; Potri.011G054300; Potri.004G046600; Potri.004G046100
OG0000039	OG0000039_333	0.0104836	Potra2n11c23311	Bpev01.c0962.g0013.m0001	FUN_013010-T1	PA_chr09_G001556	PS_chr09_G038070	PS_chr06_G024657	GO:0003677; GO:0005634; GO:0006355	DNA binding; nucleus; regulation of transcription, DNA	AT1G28310	NA	NA	Dof-type zinc finger DNA-binding family protein Dof-type zinc finger DNA-binding family protein	Potri.011G055600; Potri.011G054300; Potri.004G046600; Potri.004G046100
OG0000039	OG0000039_334	0.0132978	Potra2n11c23311	Bpev01.c0155.g0052.m0001	FUN_025419-T1	PA_chr09_G001556	PS_chr09_G038070	PS_chr06_G024657	GO:0003677; GO:0005634; GO:0006355	DNA binding; nucleus; regulation of transcription, DNA	AT1G28310	NA	NA	Dof-type zinc finger DNA-binding family protein Dof-type zinc finger DNA-binding family protein	Potri.011G055600; Potri.011G054300; Potri.004G046600; Potri.004G046100
OG0000039	OG0000039_335	0.0150995	Potra2n11c23311	Bpev01.c0155.g0052.m0001	FUN_031978-T1	PA_chr09_G001556	PS_chr09_G038070	PS_chr06_G024657	GO:0003677; GO:0005634; GO:0006355	DNA binding; nucleus; regulation of transcription, DNA	AT1G28310	NA	NA	Dof-type zinc finger DNA-binding family protein Dof-type zinc finger DNA-binding family protein	Potri.011G055600; Potri.011G054300; Potri.004G046600; Potri.004G046100
OG0000039	OG0000039_336	0.0117426	Potra2n11c23311	Bpev01.c0155.g0052.m0001	FUN_021863-T1	PA_chr09_G001556	PS_chr09_G038070	PS_chr06_G024657	GO:0003677; GO:0005634; GO:0006355	DNA binding; nucleus; regulation of transcription, DNA	AT1G28310	NA	NA	Dof-type zinc finger DNA-binding family protein Dof-type zinc finger DNA-binding family protein	Potri.011G055600; Potri.011G054300; Potri.004G046600; Potri.004G046100
OG0000039	OG0000039_337	0.0115028	Potra2n11c23311	Bpev01.c0155.g0052.m0001	FUN_019322-T1	PA_chr09_G001556	PS_chr09_G038070	PS_chr06_G024657	GO:0003677; GO:0005634; GO:0006355	DNA binding; nucleus; regulation of transcription, DNA	AT1G28310	NA	NA	Dof-type zinc finger DNA-binding family protein Dof-type zinc finger DNA-binding family protein	Potri.011G055600; Potri.011G054300; Potri.004G046600; Potri.004G046100
OG0000039	OG0000039_338	0.0115612	Potra2n11c23311	Bpev01.c0155.g0052.m0001	FUN_032079-T1	PA_chr09_G001556	PS_chr09_G038070	PS_chr06_G024657	GO:0003677; GO:0005634; GO:0006355	DNA binding; nucleus; regulation of transcription, DNA	AT1G28310	NA	NA	Dof-type zinc finger DNA-binding family protein Dof-type zinc finger DNA-binding family protein	Potri.011G055600; Potri.011G054300; Potri.004G046600; Potri.004G046100
OG0000039	OG0000039_340	0.0172667	Potra2n11c23311	Bpev01.c0030.g0036.m0001	FUN_025419-T1	PA_chr09_G001556	PS_chr09_G038070	PS_chr06_G024657	GO:0003677; GO:0005634; GO:0006355	DNA binding; nucleus; regulation of transcription, DNA	AT1G28310	NA	NA	Dof-type zinc finger DNA-binding family protein Dof-type zinc finger DNA-binding family protein	Potri.011G055600; Potri.011G054300; Potri.004G046600; Potri.004G046100
OG0000039	OG0000039_341	0.02725	Potra2n11c23311	Bpev01.c0030.g0036.m0001	FUN_031978-T1	PA_chr09_G001556	PS_chr09_G038070	PS_chr06_G024657	GO:0003677; GO:0005634; GO:0006355	DNA binding; nucleus; regulation of transcription, DNA	AT1G28310	NA	NA	Dof-type zinc finger DNA-binding family protein Dof-type zinc finger DNA-binding family protein	Potri.011G055600; Potri.011G054300; Potri.004G046600; Potri.004G046100
OG0000039	OG0000039_342	0.0209681	Potra2n11c23311	Bpev01.c0030.g0036.m0001	FUN_021863-T1	PA_chr09_G001556	PS_chr09_G038070	PS_chr06_G024657	GO:0003677; GO:0005634; GO:0006355	DNA binding; nucleus; regulation of transcription, DNA	AT1G28310	NA	NA	Dof-type zinc finger DNA-binding family protein Dof-type zinc finger DNA-binding family protein	Potri.011G055600; Potri.011G054300; Potri.004G046600; Potri.004G046100
OG0000039	OG0000039_343	0.0104849	Potra2n11c23311	Bpev01.c0030.g0036.m0001	FUN_019322-T1	PA_chr09_G001556	PS_chr09_G038070	PS_chr06_G024657	GO:0003677; GO:0005634; GO:0006355	DNA binding; nucleus; regulation of transcription, DNA	AT1G28310	NA	NA	Dof-type zinc finger DNA-binding family protein Dof-type zinc finger DNA-binding family protein	Potri.011G055600; Potri.011G054300; Potri.004G046600; Potri.004G046100
OG0000039	OG0000039_344	0.0184001	Potra2n11c23311	Bpev01.c0030.g0036.m0001	FUN_032079-T1	PA_chr09_G001556	PS_chr09_G038070	PS_chr06_G024657	GO:0003677; GO:0005634; GO:0006355	DNA binding; nucleus; regulation of transcription, DNA	AT1G28310	NA	NA	Dof-type zinc finger DNA-binding family protein Dof-type zinc finger DNA-binding family protein	Potri.011G055600; Potri.011G054300; Potri.004G046600; Potri.004G046100
OG0000039	OG0000039_346	0.0172091	Potra2n11c23311	Bpev01.c0030.g0036.m0001	FUN_019322-T1	PA_chr09_G001556	PS_chr08_G035003	PS_chr06_G024657	GO:0003677; GO:0005634; GO:0006355	DNA binding; nucleus; regulation of transcription, DNA	AT1G28310	NA	NA	Dof-type zinc finger DNA-binding family protein Dof-type zinc finger DNA-binding family protein	Potri.011G055600; Potri.011G054300; Potri.004G046600; Potri.004G046100
OG0000039	OG0000039_347	0.0172043	Potra2n11c23311	Bpev01.c0896.g0007.m0001	FUN_019322-T1	PA_chr09_G001556	PS_chr08_G035003	PS_chr06_G024657	GO:0003677; GO:0005634; GO:0006355	DNA binding; nucleus; regulation of transcription, DNA	AT1G28310	NA	NA	Dof-type zinc finger DNA-binding family protein Dof-type zinc finger DNA-binding family protein	Potri.011G055600; Potri.011G054300; Potri.004G046600; Potri.004G046100
OG0000039	OG0000039_348	0.0211329	Potra2n11c23311	Bpev01.c0962.g0013.m0001	FUN_019322-T1	PA_chr09_G001556	PS_chr08_G035003	PS_chr06_G024657	GO:0003677; GO:0005634; GO:0006355	DNA binding; nucleus; regulation of transcription, DNA	AT1G28310	NA	NA	Dof-type zinc finger DNA-binding family protein Dof-type zinc finger DNA-binding family protein	Potri.011G055600; Potri.011G054300; Potri.004G046600; Potri.004G046100
OG0000039	OG0000039_349	0.0174379	Potra2n11c23311	Bpev01.c0155.g0052.m0001	FUN_019322-T1	PA_chr09_G001556	PS_chr08_G035003	PS_chr06_G024657	GO:0003677; GO:0005634; GO:0006355	DNA binding; nucleus; regulation of transcription, DNA	AT1G28310	NA	NA	Dof-type zinc finger DNA-binding family protein Dof-type zinc finger DNA-binding family protein	Potri.011G055600; Potri.011G054300; Potri.004G046600; Potri.004G046100
OG0000039	OG0000039_350	0.0230875	Potra2n11c23311	Bpev01.c0368.g0007.m0001	FUN_019322-T1	PA_chr09_G001556	PS_chr08_G035003	PS_chr06_G024657	GO:0003677; GO:0005634; GO:0006355	DNA binding; nucleus; regulation of transcription, DNA	AT1G28310	NA	NA	Dof-type zinc finger DNA-binding family protein Dof-type zinc finger DNA-binding family protein	Potri.011G055600; Potri.011G054300; Potri.004G046600; Potri.004G046100
OG0000039	OG0000039_351	0.0174825	Potra2n11c23311	Bpev01.c0030.g0036.m0001	FUN_013010-T1	PA_chr09_G001556	PS_chr08_G035003	PS_chr06_G024657	GO:0003677; GO:0005634; GO:0006355	DNA binding; nucleus; regulation of transcription, DNA	AT1G28310	NA	NA	Dof-type zinc finger DNA-binding family protein Dof-type zinc finger DNA-binding family protein	Potri.011G055600; Potri.011G054300; Potri.004G046600; Potri.004G046100
OG0000039	OG0000039_352	0.0172049	Potra2n11c23311	Bpev01.c0896.g0007.m0001	FUN_013010-T1	PA_chr09_G001556	PS_chr08_G035003	PS_chr06_G024657	GO:0003677; GO:0005634; GO:0006355	DNA binding; nucleus; regulation of transcription, DNA	AT1G28310	NA	NA	Dof-type zinc finger DNA-binding family protein Dof-type zinc finger DNA-binding family protein	Potri.011G055600; Potri.011G054300; Potri.004G046600; Potri.004G046100
OG0000039	OG0000039_353	0.0172063	Potra2n11c23311	Bpev01.c0962.g0013.m0001	FUN_013010-T1	PA_chr09_G001556	PS_chr08_G035003	PS_chr06_G024657	GO:0003677; GO:0005634; GO:0006355	DNA binding; nucleus; regulation of transcription, DNA	AT1G28310	NA	NA	Dof-type zinc finger DNA-binding family protein Dof-type zinc finger DNA-binding family protein	Potri.011G055600; Potri.011G054300; Potri.004G046600; Potri.004G046100
OG0000039	OG0000039_354	0.0180297	Potra2n11c23311	Bpev01.c0155.g0052.m0001	FUN_013010-T1	PA_chr09_G001556	PS_chr08_G035003	PS_chr06_G024657	GO:0003677; GO:0005634; GO:0006355	DNA binding; nucleus; regulation of transcription, DNA	AT1G28310	NA	NA	Dof-type zinc finger DNA-binding family protein Dof-type zinc finger DNA-binding family protein	Potri.011G055600; Potri.011G054300; Potri.004G046600; Potri.004G046100
OG0000039	OG0000039_355	0.0230875	Potra2n11c23311	Bpev01.c0368.g0007.m0001	FUN_013010-T1	PA_chr09_G001556	PS_chr08_G035003	PS_chr06_G024657	GO:0003677; GO:0005634; GO:0006355	DNA binding; nucleus; regulation of transcription, DNA	AT1G28310	NA	NA	Dof-type zinc finger DNA-binding family protein Dof-type zinc finger DNA-binding family protein	Potri.011G055600; Potri.011G054300; Potri.004G046600; Potri.004G046100
OG0000039	OG0000039_356	0.0172092	Potra2n11c23311	Bpev01.c0030.g0036.m0001	FUN_032079-T1	PA_chr09_G001556	PS_chr08_G035003	PS_chr06_G024657	GO:0003677; GO:0005634; GO:0006355	DNA binding; nucleus; regulation of transcription, DNA	AT1G28310	NA	NA	Dof-type zinc finger DNA-binding family protein Dof-type zinc finger DNA-binding family protein	Potri.011G055600; Potri.011G054300; Potri.004G046600; Potri.004G046100
OG0000039	OG0000039_357	0.0172043	Potra2n11c23311	Bpev01.c0896.g0007.m0001	FUN_032079-T1	PA_chr09_G001556	PS_chr08_G035003	PS_chr06_G024657	GO:0003677; GO:0005634; GO:0006355	DNA binding; nucleus; regulation of transcription, DNA	AT1G28310	NA	NA	Dof-type zinc finger DNA-binding family protein Dof-type zinc finger DNA-binding family protein	Potri.011G055600; Potri.011G054300; Potri.004G046600; Potri.004G046100
OG0000039	OG0000039_358	0.0278526	Potra2n11c23311	Bpev01.c0962.g0013.m0001	FUN_032079-T1	PA_chr09_G001556	PS_chr08_G035003	PS_chr06_G024657	GO:0003677; GO:0005634; GO:0006355	DNA binding; nucleus; regulation of transcription, DNA	AT1G28310	NA	NA	Dof-type zinc finger DNA-binding family protein Dof-type zinc finger DNA-binding family protein	Potri.011G055600; Potri.011G054300; Potri.004G046600; Potri.004G046100
OG0000039	OG0000039_359	0.0180826	Potra2n11c23311	Bpev01.c0155.g0052.m0001	FUN_032079-T1	PA_chr09_G001556	PS_chr08_G035003	PS_chr06_G024657	GO:0003677; GO:0005634; GO:0006355	DNA binding; nucleus; regulation of transcription, DNA	AT1G28310	NA	NA	Dof-type zinc finger DNA-binding family protein Dof-type zinc finger DNA-binding family protein	Potri.011G055600; Potri.011G054300; Potri.004G046600; Potri.004G046100
OG0000039	OG0000039_360	0.0230878	Potra2n11c23311	Bpev01.c0368.g0007.m0001	FUN_032079-T1	PA_chr09_G001556	PS_chr08_G035003	PS_chr06_G024657	GO:0003677; GO:0005634; GO:0006355	DNA binding; nucleus; regulation of transcription, DNA	AT1G28310	NA	NA	Dof-type zinc finger DNA-binding family protein Dof-type zinc finger DNA-binding family protein	Potri.011G055600; Potri.011G054300; Potri.004G046600; Potri.004G046100
OG0000039	OG0000039_361	0.0172106	Potra2n11c23311	Bpev01.c0030.g0036.m0001	FUN_021863-T1	PA_chr09_G001556	PS_chr08_G035003	PS_chr06_G024657	GO:0003677; GO:0005634; GO:0006355	DNA binding; nucleus; regulation of transcription, DNA	AT1G28310	NA	NA	Dof-type zinc finger DNA-binding family protein Dof-type zinc finger DNA-binding family protein	Potri.011G055600; Potri.011G054300; Potri.004G046600; Potri.004G046100
OG0000039	OG0000039_362	0.0172057	Potra2n11c23311	Bpev01.c0896.g0007.m0001	FUN_021863-T1	PA_chr09_G001556	PS_chr08_G035003	PS_chr06_G024657	GO:0003677; GO:0005634; GO:0006355	DNA binding; nucleus; regulation of transcription, DNA	AT1G28310	NA	NA	Dof-type zinc finger DNA-binding family protein Dof-type zinc finger DNA-binding family protein	Potri.011G055600; Potri.011G054300; Potri.004G046600; Potri.004G046100
OG0000039	OG0000039_363	0.0272247	Potra2n11c23311	Bpev01.c0962.g0013.m0001	FUN_021863-T1	PA_chr09_G001556	PS_chr08_G035003	PS_chr06_G024657	GO:0003677; GO:0005634; GO:0006355	DNA binding; nucleus; regulation of transcription, DNA	AT1G28310	NA	NA	Dof-type zinc finger DNA-binding family protein Dof-type zinc finger DNA-binding family protein	Potri.011G055600; Potri.011G054300; Potri.004G046600; Potri.004G046100
OG0000039	OG0000039_364	0.0176347	Potra2n11c23311	Bpev01.c0155.g0052.m0001	FUN_021863-T1	PA_chr09_G001556	PS_chr08_G035003	PS_chr06_G024657	GO:0003677; GO:0005634; GO:0006355	DNA binding; nucleus; regulation of transcription, DNA	AT1G28310	NA	NA	Dof-type zinc finger DNA-binding family protein Dof-type zinc finger DNA-binding family protein	Potri.011G055600; Potri.011G054300; Potri.004G046600; Potri.004G046100
OG0000039	OG0000039_365	0.00714913	Potra2n11c23311	Bpev01.c0030.g0036.m0001	FUN_019322-T1	PA_chr09_G001556	PS_chr08_G035003	PS_chr08_G035003	GO:0003677; GO:0005634; GO:0006355	DNA binding; nucleus; regulation of transcription, DNA	AT1G28310	NA	NA	Dof-type zinc finger DNA-binding family protein Dof-type zinc finger DNA-binding family protein	Potri.011G055600; Potri.011G054300; Potri.004G046600; Potri.004G046100
OG0000039	OG0000039_366	0.00714428	Potra2n11c23311	Bpev01.c0896.g0007.m0001	FUN_019322-T1	PA_chr09_G001556	PS_chr08_G035003	PS_chr08_G035003	GO:0003677; GO:0005634; GO:0006355	DNA binding; nucleus; regulation of transcription, DNA	AT1G28310	NA	NA	Dof-type zinc finger DNA-binding family protein Dof-type zinc finger DNA-binding family protein	Potri.011G055600; Potri.011G054300; Potri.004G046600; Potri.004G046100
OG0000039	OG0000039_367	0.0110729	Potra2n11c23311	Bpev01.c0962.g0013.m0001	FUN_019322-T1	PA_chr09_G001556	PS_chr08_G035003	PS_chr08_G035003	GO:0003677; GO:0005634; GO:0006355	DNA binding; nucleus; regulation of transcription, DNA	AT1G28310	NA	NA	Dof-type zinc finger DNA-binding family protein Dof-type zinc finger DNA-binding family protein	Potri.011G055600; Potri.011G054300; Potri.004G046600; Potri.004G046100
OG0000039	OG0000039_368	0.00737785	Potra2n11c23311	Bpev01.c0155.g0052.m0001	FUN_019322-T1	PA_chr09_G001556	PS_chr08_G035003	PS_chr08_G035003	GO:0003677; GO:0005634; GO:0006355	DNA binding; nucleus; regulation of transcription, DNA	AT1G28310	NA	NA	Dof-type zinc finger DNA-binding family protein Dof-type zinc finger DNA-binding family protein	Potri.011G055600; Potri.011G054300; Potri.004G046600; Potri.004G046100
OG0000039	OG0000039_369	0.0130275	Potra2n11c23311	Bpev01.c0368.g0007.m0001	FUN_019322-T1	PA_chr09_G001556	PS_chr08_G035003	PS_chr08_G035003	GO:0003677; GO:0005634; GO:0006355	DNA binding; nucleus; regulation of transcription, DNA	AT1G28310	NA	NA	Dof-type zinc finger DNA-binding family protein Dof-type zinc finger DNA-binding family protein	Potri.011G055600; Potri.011G054300; Potri.004G046600; Potri.004G046100
OG0000039	OG0000039_370	0.00721135	Potra2n11c23311	Bpev01.c0618.g0004.m0001	FUN_019322-T1	PA_chr09_G001556	PS_chr08_G035003	PS_chr08_G035003	GO:0003677; GO:0005634; GO:0006355	DNA binding; nucleus; regulation of transcription, DNA	AT1G28310	NA	NA	Dof-type zinc finger DNA-binding family protein Dof-type zinc finger DNA-binding family protein	Potri.011G055600; Potri.011G054300; Potri.004G046600; Potri.004G046100
OG0000039	OG0000039_371	0.00741785	Potra2n11c23311	Bpev01.c0188.g0017.m0001	FUN_019322-T1	PA_chr09_G001556	PS_chr08_G035003	PS_chr08_G035003	GO:0003677; GO:0005634; GO:0006355	DNA binding; nucleus; regulation of transcription, DNA	AT1G28310	NA	NA	Dof-type zinc finger DNA-binding family protein Dof-type zinc finger DNA-binding family protein	Potri.011G055600; Potri.011G054300; Potri.004G046600; Potri.004G046100
OG0000039	OG0000039_372	0.0071506	Potra2n11c23311	Bpev01.c0030.g0036.m0001	FUN_032079-T1	PA_chr09_G001556	PS_chr08_G035003	PS_chr08_G035003	GO:0003677; GO:0005634; GO:0006355	DNA binding; nucleus; regulation of transcription, DNA	AT1G28310	NA	NA	Dof-type zinc finger DNA-binding family protein Dof-type zinc finger DNA-binding family protein	Potri.011G055600; Potri.011G054300; Potri.004G046600; Potri.004G046100
OG0000039	OG0000039_373	0.00714575	Potra2n11c23311	Bpev01.c0896.g0007.m0001	FUN_032079-T1	PA_chr09_G001556	PS_chr08_G035003	PS_chr08_G035003	GO:0003677; GO:0005634; GO:0006355	DNA binding; nucleus; regulation of transcription, DNA	AT1G28310	NA	NA	Dof-type zinc finger DNA-binding family protein Dof-type zinc finger DNA-binding family protein	Potri.011G055600; Potri.011G054300; Potri.004G046600; Potri.004G046100
OG0000039	OG0000039_374	0.00939065	Potra2n11c23311	Bpev01.c0962.g0013.m0001	FUN_032079-T1	PA_chr09_G001556	PS_chr08_G035003	PS_chr08_G035003	GO:0003677; GO:0005634; GO:0006355	DNA binding; nucleus; regulation of transcription, DNA	AT1G28310	NA	NA	Dof-type zinc finger DNA-binding family protein Dof-type zinc finger DNA-binding family protein	Potri.011G055600; Potri.011G054300; Potri.004G046600; Potri.004G046100
OG0000039	OG0000039_375	0.00802398	Potra2n11c23311	Bpev01.c0155.g0052.m0001	FUN_032079-T1	PA_chr09_G001556	PS_chr08_G035003	PS_chr08_G035003	GO:0003677; GO:0005634; GO:0006355	DNA binding; nucleus; regulation of transcription, DNA	AT1G28310	NA	NA	Dof-type zinc finger DNA-binding family protein Dof-type zinc finger DNA-binding family protein	Potri.011G055600; Potri.011G054300; Potri.004G046600; Potri.004G046100
OG0000039	OG0000039_376	0.017129	Potra2n11c23311	Bpev01.c0368.g0007.m0001	FUN_032079-T1	PA_chr09_G001556	PS_chr08_G035003	PS_chr08_G035003	GO:0003677; GO:0005634; GO:0006355	DNA binding; nucleus; regulation of transcription, DNA	AT1G28310	NA	NA	Dof-type zinc finger DNA-binding family protein Dof-type zinc finger DNA-binding family protein	Potri.011G055600; Potri.011G054300; Potri.004G046600; Potri.004G046100
OG0000039	OG0000039_378	0.00788898	Potra2n11c23311	Bpev01.c0188.g0017.m0001	FUN_032079-T1	PA_chr09_G001556	PS_chr08_G035003	PS_chr08_G035003	GO:0003677; GO:0005634; GO:0006355	DNA binding; nucleus; regulation of transcription, DNA	AT1G28310	NA	NA	Dof-type zinc finger DNA-binding family protein Dof-type zinc finger DNA-binding family protein	Potri.011G055600; Potri.011G054300; Potri.004G046600; Potri.004G046100
OG0000039	OG0000039_379	0.00714914	Potra2n11c23311	Bpev01.c0030.g0036.m0001	FUN_021863-T1	PA_chr09_G001556	PS_chr08_G035003	PS_chr08_G035003	GO:0003677; GO:0005634; GO:0006355	DNA binding; nucleus; regulation of transcription, DNA	AT1G28310	NA	NA	Dof-type zinc finger DNA-binding family protein Dof-type zinc finger DNA-binding family protein	Potri.011G055600; Potri.011G054300; Potri.004G046600; Potri.004G046100
OG0000039	OG0000039_380	0.00714429	Potra2n11c23311	Bpev01.c0896.g0007.m0001	FUN_021863-T1	PA_chr09_G001556	PS_chr08_G035003	PS_chr08_G035003	GO:0003677; GO:0005634; GO:0006355	DNA binding; nucleus; regulation of transcription, DNA	AT1G28310	NA	NA	Dof-type zinc finger DNA-binding family protein Dof-type zinc finger DNA-binding family protein	Potri.011G055600; Potri.011G054300; Potri.004G046600; Potri.004G046100
OG0000039	OG0000039_381	0.00875989	Potra2n11c23311	Bpev01.c0962.g0013.m0001	FUN_021863-T1	PA_chr09_G001556	PS_chr08_G035003	PS_chr08_G035003	GO:0003677; GO:0005634; GO:0006355	DNA binding; nucleus; regulation of transcription, DNA	AT1G28310	NA	NA	Dof-type zinc finger DNA-binding family protein Dof-type zinc finger DNA-binding family protein	Potri.011G055600; Potri.011G054300; Potri.004G046600; Potri.004G046100
OG0000039	OG0000039_382	0.00757322	Potra2n11c23311	Bpev01.c0155.g0052.m0001	FUN_021863-T1	PA_chr09_G001556	PS_chr08_G035003	PS_chr08_G035003	GO:0003677; GO:0005634; GO:0006355	DNA binding; nucleus; regulation of transcription, DNA	AT1G28310	NA	NA	Dof-type zinc finger DNA-binding family protein Dof-type zinc finger DNA-binding family protein	Potri.011G055600; Potri.011G054300; Potri.004G046600; Potri.004G046100
OG0000039	OG0000039_383	0.0232966	Potra2n11c23311	Bpev01.c0188.g0017.m0001	FUN_021863-T1	PA_chr09_G001556	PS_chr08_G035003	PS_chr08_G035003	GO:0003677; GO:0005634; GO:0006355	DNA binding; nucleus; regulation of transcription, DNA	AT1G28310	NA	NA	Dof-type zinc finger DNA-binding family protein Dof-type zinc finger DNA-binding family protein	Potri.011G055600; Potri.011G054300; Potri.004G046600; Potri.004G046100
OG0000039	OG0000039_384	0.0129825	Potra2n11c23311	Bpev01.c0030.g0036.m0001	FUN_026351-T1	PA_chr09_G001556	PS_chr08_G035003	PS_chr08_G035003	GO:0003677; GO:0005634; GO:0006355	DNA binding; nucleus; regulation of transcription, DNA	AT1G28310	NA	NA	Dof-type zinc finger DNA-binding family protein Dof-type zinc finger DNA-binding family protein	Potri.011G055600; Potri.011G054300; Potri.004G046600; Potri.004G046100
OG0000039	OG0000039_385	0.0134443	Potra2n11c23311	Bpev01.c0896.g0007.m0001	FUN_026351-T1	PA_chr09_G001556	PS_chr08_G035003	PS_chr08_G035003	GO:0003677; GO:0005634; GO:0006355	DNA binding; nucleus; regulation of transcription, DNA	AT1G28310	NA	NA	Dof-type zinc finger DNA-binding family protein Dof-type zinc finger DNA-binding family protein	Potri.011G055600; Potri.011G054300; Potri.004G046600; Potri.004G046100
OG0000039	OG0000039_386	0.00990285	Potra2n11c23311	Bpev01.c0188.g0017.m0001	FUN_026351-T1	PA_chr09_G001556	PS_chr08_G035003	PS_chr08_G035003	GO:0003677; GO:0005634; GO:0006355	DNA binding; nucleus; regulation of transcription, DNA	AT1G28310	NA	NA	Dof-type zinc finger DNA-binding family protein Dof-type zinc finger DNA-binding family protein	Potri.011G055600; Potri.011G054300; Potri.004G046600; Potri.004G046100
OG0000039	OG0000039_387	0.0140942	Potra2n11c23311	Bpev01.c0155.g0052.m0001	FUN_026351-T1	PA_chr09_G001556	PS_chr08_G035003	PS_chr08_G035003	GO:0003677; GO:0005634; GO:0006355	DNA binding; nucleus; regulation of transcription, DNA	AT1G28310	NA	NA	Dof-type zinc finger DNA-binding family protein Dof-type zinc finger DNA-binding family protein	Potri.011G055600; Potri.011G054300; Potri.004G046600; Potri.004G046100
OG0000039	OG0000039_388	0.00989418	Potra2n11c23311	Bpev01.c0962.g0013.m0001	FUN_026351-T1	PA_chr09_G001556	PS_chr08_G035003	PS_chr08_G035003	GO:0003677; GO:0005634; GO:0006355	DNA binding; nucleus; regulation of transcription, DNA	AT1G28310	NA	NA	Dof-type zinc finger DNA-binding family protein Dof-type zinc finger DNA-binding family protein	Potri.011G055600; Potri.011G054300; Potri.004G046600; Potri.004G046100
OG0000039	OG0000039_389	0.00991685	Potra2n11c23311	Bpev01.c0618.g0004.m0001	FUN_026351-T1	PA_chr09_G001556	PS_chr08_G035003	PS_chr08_G035003	GO:0003677; GO:0005634; GO:0006355	DNA binding; nucleus; regulation of transcription, DNA	AT1G28310	NA	NA	Dof-type zinc finger DNA-binding family protein Dof-type zinc finger DNA-binding family protein	Potri.011G055600; Potri.011G054300; Potri.004G046600; Potri.004G046100
OG0000039	OG0000039_390	0.0176275	Potra2n11c23311	Bpev01.c0368.g0007.m0001	FUN_026351-T1	PA_chr09_G001556	PS_chr08_G035003	PS_chr08_G035003	GO:0003677; GO:0005634; GO:0006355	DNA binding; nucleus; regulation of transcription, DNA	AT1G28310	NA	NA	Dof-type zinc finger DNA-binding family protein Dof-type zinc finger DNA-binding family protein	Potri.011G055600; Potri.011G054300; Potri.004G046600; Potri.004G046100
OG0000039	OG0000039_391	0.00714916	Potra2n11c23311	Bpev01.c0030.g0036.m0001	FUN_013010-T1	PA_chr09_G001556	PS_chr08_G035003	PS_chr08_G035003	GO:0003677; GO:0005634; GO:0006355	DNA binding; nucleus; regulation of transcription, DNA	AT1G28310	NA	NA	Dof-type zinc finger DNA-binding family protein Dof-type zinc finger DNA-binding family protein	Potri.011G055600; Potri.011G054300; Potri.004G046600; Potri.004G046100
OG0000039	OG0000039_392	0.00714428	Potra2n11c23311	Bpev01.c0896.g0007.m0001	FUN_013010-T1	PA_chr09_G001556	PS_chr08_G035003	PS_chr08_G035003	GO:0003677; GO:0005634; GO:0006355	DNA binding; nucleus; regulation of transcription, DNA	AT1G28310	NA	NA	Dof-type zinc finger DNA-binding family protein Dof-type zinc finger DNA-binding family protein	Potri.011G055600; Potri.011G054300; Potri.004G046600; Potri.004G046100
OG0000039	OG0000039_393	0.00714632	Potra2n11c23311	Bpev01.c0962.g0013.m0001	FUN_013010-T1	PA_chr09_G001556	PS_chr08_G035003	PS_chr08_G035003	GO:0003677; GO:0005634; GO:0006355	DNA binding; nucleus; regulation of transcription, DNA	AT1G28310	NA	NA	Dof-type zinc finger DNA-binding family protein Dof-type zinc finger DNA-binding family protein	Potri.011G055600; Potri.011G054300; Potri.004G046600; Potri.004G046100
OG0000039	OG0000039_394	0.0162797	Potra2n11c23311	Bpev01.c0155.g0052.m0001	FUN_013010-T1	PA_chr09_G001556	PS_chr08_G035003	PS_chr08_G035003	GO:0003677; GO:0005634; GO:0006355	DNA binding; nucleus; regulation of transcription, DNA	AT1G28310	NA	NA	Dof-type zinc finger DNA-binding family protein Dof-type zinc finger DNA-binding family protein	Potri.011G055600; Potri.011G054300; Potri.004G046600; Potri.004G046100
OG0000039	OG0000039_395	0.0130275	Potra2n11c23311	Bpev01.c0368.g0007.m0001	FUN_013010-T1	PA_chr09_G001556	PS_chr08_G035003	PS_chr08_G035003	GO:0003677; GO:0005634; GO:0006355	DNA binding; nucleus; regulation of transcription, DNA	AT1G28310	NA	NA	Dof-type zinc finger DNA-binding family protein Dof-type zinc finger DNA-binding family protein	Potri.011G055600; Potri.011G054300; Potri.004G046600; Potri.004G046100
OG0000039	OG0000039_396	0.00714648	Potra2n11c23311	Bpev01.c0188.g0017.m0001	FUN_013010-T1	PA_chr09_G001556	PS_chr08_G035003	PS_chr08_G035003	GO:0003677; GO:0005634; GO:0006355	DNA binding; nucleus; regulation of transcription, DNA	AT1G28310	NA	NA	Dof-type zinc finger DNA-binding family protein Dof-type zinc finger DNA-binding family protein	Potri.011G055600; Potri.011G054300; Potri.004G046600; Potri.004G046100
OG0000039	OG0000039_397	0.0098114	Potra2n11c23311	Bpev01.c0030.g0036.m0001	FUN_026351-T1	PA_chr09_G001556	PS_chr08_G035003	PS_chr02_G006060	GO:0003677; GO:0005634; GO:0006355	DNA binding; nucleus; regulation of transcription, DNA	AT1G28310	NA	NA	Dof-type zinc finger DNA-binding family protein Dof-type zinc finger DNA-binding family protein	Potri.011G055600; Potri.011G054300; Potri.004G046600; Potri.004G046100
OG0000039	OG0000039_398	0.0102732	Potra2n11c23311	Bpev01.c0896.g0007.m0001	FUN_026351-T1	PA_chr09_G001556	PS_chr08_G035003	PS_chr02_G006060	GO:0003677; GO:0005634; GO:0006355	DNA binding; nucleus; regulation of transcription, DNA	AT1G28310	NA	NA	Dof-type zinc finger DNA-binding family protein Dof-type zinc finger DNA-binding family protein	Potri.011G055600; Potri.011G054300; Potri.004G046600; Potri.004G046100
OG0000039	OG0000039_399	0.00673178	Potra2n11c23311	Bpev01.c0188.g0017.m0001	FUN_026351-T1	PA_chr09_G001556	PS_chr08_G035003	PS_chr02_G006060	GO:0003677; GO:0005634; GO:0006355	DNA binding; nucleus; regulation of transcription, DNA	AT1G28310	NA	NA	Dof-type zinc finger DNA-binding family protein Dof-type zinc finger DNA-binding family protein	Potri.011G055600; Potri.011G054300; Potri.004G046600; Potri.004G046100
OG0000039	OG0000039_400	0.0109231	Potra2n11c23311	Bpev01.c0155.g0052.m0001	FUN_026351-T1	PA_chr09_G001556	PS_chr08_G035003	PS_chr02_G006060	GO:0003677; GO:0005634; GO:0006355	DNA binding; nucleus; regulation of transcription, DNA	AT1G28310	NA	NA	Dof-type zinc finger DNA-binding family protein Dof-type zinc finger DNA-binding family protein	Potri.011G055600; Potri.011G054300; Potri.004G046600; Potri.004G046100
OG0000039	OG0000039_401	0.00672311	Potra2n11c23311	Bpev01.c0962.g0013.m0001	FUN_026351-T1	PA_chr09_G001556	PS_chr08_G035003	PS_chr02_G006060	GO:0003677; GO:0005634; GO:0006355	DNA binding; nucleus; regulation of transcription, DNA	AT1G28310	NA	NA	Dof-type zinc finger DNA-binding family protein Dof-type zinc finger DNA-binding family protein	Potri.011G055600; Potri.011G054300; Potri.004G046600; Potri.004G046100
OG0000039	OG0000039_402	0.00674578	Potra2n11c23311	Bpev01.c0618.g0004.m0001	FUN_026351-T1	PA_chr09_G001556	PS_chr08_G035003	PS_chr02_G006060	GO:0003677; GO:0005634; GO:0006355	DNA binding; nucleus; regulation of transcription, DNA	AT1G28310	NA	NA	Dof-type zinc finger DNA-binding family protein Dof-type zinc finger DNA-binding family protein	Potri.011G055600; Potri.011G054300; Potri.004G046600; Potri.004G046100
OG0000039	OG0000039_403	0.0144564	Potra2n11c23311	Bpev01.c0368.g0007.m0001	FUN_026351-T1	PA_chr09_G001556	PS_chr08_G035003	PS_chr02_G006060	GO:0003677; GO:0005634; GO:0006355	DNA binding; nucleus; regulation of transcription, DNA	AT1G28310	NA	NA	Dof-type zinc finger DNA-binding family protein Dof-type zinc finger DNA-binding family protein	Potri.011G055600; Potri.011G054300; Potri.004G046600; Potri.004G046100
OG0000039	OG0000039_404	0.0207113	Potra2n11c23311	Bpev01.c0030.g0036.m0001	FUN_021863-T1	PA_chr09_G001556	PS_chr08_G035003	PS_chr02_G006060	GO:0003677; GO:0005634; GO:0006355	DNA binding; nucleus; regulation of transcription, DNA	AT1G28310	NA	NA	Dof-type zinc finger DNA-binding family protein Dof-type zinc finger DNA-binding family protein	Potri.011G055600; Potri.011G054300; Potri.004G046600; Potri.004G046100
OG0000039	OG0000039_405	0.0207064	Potra2n11c23311	Bpev01.c0896.g0007.m0001	FUN_021863-T1	PA_chr09_G001556	PS_chr08_G035003	PS_chr02_G006060	GO:0003677; GO:0005634; GO:0006355	DNA binding; nucleus; regulation of transcription, DNA	AT1G28310	NA	NA	Dof-type zinc finger DNA-binding family protein Dof-type zinc finger DNA-binding family protein	Potri.011G055600; Potri.011G054300; Potri.004G046600; Potri.004G046100
OG0000039	OG0000039_406	0.0208743	Potra2n11c23311	Bpev01.c0962.g0013.m0001	FUN_021863-T1	PA_chr09_G001556	PS_chr08_G035003	PS_chr02_G006060	GO:0003677; GO:0005634; GO:0006355	DNA binding; nucleus; regulation of transcription, DNA	AT1G28310	NA	NA	Dof-type zinc finger DNA-binding family protein Dof-type zinc finger DNA-binding family protein	Potri.011G055600; Potri.011G054300; Potri.004G046600; Potri.004G046100
OG0000039	OG0000039_407	0.0211354	Potra2n11c23311	Bpev01.c0155.g0052.m0001	FUN_021863-T1	PA_chr09_G001556	PS_chr08_G035003	PS_chr02_G006060	GO:0003677; GO:0005634; GO:0006355	DNA binding; nucleus; regulation of transcription, DNA	AT1G28310	NA	NA	Dof-type zinc finger DNA-binding family protein Dof-type zinc finger DNA-binding family protein	Potri.011G055600; Potri.011G054300; Potri.004G046600; Potri.004G046100
OG0000039	OG0000039_408	0.0207087	Potra2n11c23311	Bpev01.c0188.g0017.m0001	FUN_021863-T1	PA_chr09_G001556	PS_chr08_G035003	PS_chr02_G006060	GO:0003677; GO:0005634; GO:0006355	DNA binding; nucleus; regulation of transcription, DNA	AT1G28310	NA	NA	Dof-type zinc finger DNA-binding family protein Dof-type zinc finger DNA-binding family protein	Potri.011G055600; Potri.011G054300; Potri.004G046600; Potri.004G046100
OG0000039	OG0000039_409	0.00674067	Potra2n11c23311	Bpev01.c0030.g0036.m0001	FUN_019322-T1	PA_chr09_G001556	PS_chr08_G035003	PS_chr02_G006060	GO:0003677; GO:0005634; GO:0006355	DNA binding; nucleus; regulation of transcription, DNA	AT1G28310	NA	NA	Dof-type zinc finger DNA-binding family protein Dof-type zinc finger DNA-binding family protein	Potri.011G055600; Potri.011G054300; Potri.004G046600; Potri.004G046100
OG0000039	OG0000039_410	0.00673582	Potra2n11c23311	Bpev01.c0896.g0007.m0001	FUN_019322-T1	PA_chr09_G001556	PS_chr08_G035003	PS_chr02_G006060	GO:0003677; GO:0005634; GO:0006355	DNA binding; nucleus; regulation of transcription, DNA	AT1G28310	NA	NA	Dof-type zinc finger DNA-binding family protein Dof-type zinc finger DNA-binding family protein	Potri.011G055600; Potri.011G054300; Potri.004G046600; Potri.004G046100
OG0000039	OG0000039_411	0.0106644	Potra2n11c23311	Bpev01.c0962.g0013.m0001	FUN_019322-T1	PA_chr09_G001556	PS_chr08_G035003	PS_chr02_G006060	GO:0003677; GO:0005634; GO:0006355	DNA binding; nucleus; regulation of transcription, DNA	AT1G28310	NA	NA	Dof-type zinc finger DNA-binding family protein Dof-type zinc finger DNA-binding family protein	Potri.011G055600; Potri.011G054300; Potri.004G046600; Potri.004G046100
OG0000039	OG0000039_412	0.00696938	Potra2n11c23311	Bpev01.c0155.g0052.m0001	FUN_019322-T1	PA_chr09_G001556	PS_chr08_G035003	PS_chr02_G006060	GO:0003677; GO:0005634; GO:0006355	DNA binding; nucleus; regulation of transcription, DNA	AT1G28310	NA	NA	Dof-type zinc finger DNA-binding family protein Dof-type zinc finger DNA-binding family protein	Potri.011G055600; Potri.011G054300; Potri.004G046600; Potri.004G046100
OG0000039	OG0000039_413	0.0126191	Potra2n11c23311	Bpev01.c0368.g0007.m0001	FUN_019322-T1	PA_chr09_G001556	PS_chr08_G035003	PS_chr02_G006060	GO:0003677; GO:0005634; GO:0006355	DNA binding; nucleus; regulation of transcription, DNA	AT1G28310	NA	NA	Dof-type zinc finger DNA-binding family protein Dof-type zinc finger DNA-binding family protein	Potri.011G055600; Potri.011G054300; Potri.004G046600; Potri.004G046100
OG0000039	OG0000039_414	0.00680288	Potra2n11c23311	Bpev01.c0618.g0004.m0001	FUN_019322-T1	PA_chr09_G001556	PS_chr08_G035003	PS_chr02_G006060	GO:0003677; GO:0005634; GO:0006355	DNA binding; nucleus; regulation of transcription, DNA	AT1G28310	NA	NA	Dof-type zinc finger DNA-binding family protein Dof-type zinc finger DNA-binding family protein	Potri.011G055600; Potri.011G054300; Potri.004G046600; Potri.004G046100
OG0000039	OG0000039_415	0.00700938	Potra2n11c23311	Bpev01.c0188.g0017.m0001	FUN_019322-T1	PA_chr09_G001556	PS_chr08_G035003	PS_chr02_G006060	GO:0003677; GO:0005634; GO:0006355	DNA binding; nucleus; regulation of transcription, DNA	AT1G28310	NA	NA	Dof-type zinc finger DNA-binding family protein Dof-type zinc finger DNA-binding family protein	Potri.011G055600; Potri.011G054300; Potri.004G046600; Potri.004G046100
OG0000039	OG0000039_416	0.00876127	Potra2n11c23311	Bpev01.c0030.g0036.m0001	FUN_032079-T1	PA_chr09_G001556	PS_chr08_G035003	PS_chr02_G006060	GO:0003677; GO:0005634; GO:0006355	DNA binding; nucleus; regulation of transcription, DNA	AT1G28310	NA	NA	Dof-type zinc finger DNA-binding family protein Dof-type zinc finger DNA-binding family protein	Potri.011G055600; Potri.011G054300; Potri.004G046600; Potri.004G046100
OG0000039	OG0000039_417	0.00875642	Potra2n11c23311	Bpev01.c0896.g0007.m0001	FUN_032079-T1	PA_chr09_G001556	PS_chr08_G035003	PS_chr02_G006060	GO:0003677; GO:0005634; GO:0006355	DNA binding; nucleus; regulation of transcription, DNA	AT1G28310	NA	NA	Dof-type zinc finger DNA-binding family protein Dof-type zinc finger DNA-binding family protein	Potri.011G055600; Potri.011G054300; Potri.004G046600; Potri.004G046100
OG0000039	OG0000039_418	0.00955365	Potra2n11c23311	Bpev01.c0962.g0013.m0001	FUN_032079-T1	PA_chr09_G001556	PS_chr08_G035003	PS_chr02_G006060	GO:0003677; GO:0005634; GO:0006355	DNA binding; nucleus; regulation of transcription, DNA	AT1G28310	NA	NA	Dof-type zinc finger DNA-binding family protein Dof-type zinc finger DNA-binding family protein	Potri.011G055600; Potri.011G054300; Potri.004G046600; Potri.004G046100
OG0000039	OG0000039_419	0.00963465	Potra2n11c23311	Bpev01.c0155.g0052.m0001	FUN_032079-T1	PA_chr09_G001556	PS_chr08_G035003	PS_chr02_G006060	GO:0003677; GO:0005634; GO:0006355	DNA binding; nucleus; regulation of transcription, DNA	AT1G28310	NA	NA	Dof-type zinc finger DNA-binding family protein Dof-type zinc finger DNA-binding family protein	Potri.011G055600; Potri.011G054300; Potri.004G046600; Potri.004G046100
OG0000039	OG0000039_420	0.0146397	Potra2n11c23311	Bpev01.c0368.g0007.m0001	FUN_032079-T1	PA_chr09_G001556	PS_chr08_G035003	PS_chr02_G006060	GO:0003677; GO:0005634; GO:0006355	DNA binding; nucleus; regulation of transcription, DNA	AT1G28310	NA	NA	Dof-type zinc finger DNA-binding family protein Dof-type zinc finger DNA-binding family protein	Potri.011G055600; Potri.011G054300; Potri.004G046600; Potri.004G046100
OG0000039	OG0000039_422	0.00949965	Potra2n11c23311	Bpev01.c0188.g0017.m0001	FUN_032079-T1	PA_chr09_G001556	PS_chr08_G035003	PS_chr02_G006060	GO:0003677; GO:0005634; GO:0006355	DNA binding; nucleus; regulation of transcription, DNA	AT1G28310	NA	NA	Dof-type zinc finger DNA-binding family protein Dof-type zinc finger DNA-binding family protein	Potri.011G055600; Potri.011G054300; Potri.004G046600; Potri.004G046100
OG0000039	OG0000039_423	0.0074765	Potra2n11c23311	Bpev01.c0030.g0036.m0001	FUN_013010-T1	PA_chr09_G001556	PS_chr08_G035003	PS_chr02_G006060	GO:0003677; GO:0005634; GO:0006355	DNA binding; nucleus; regulation of transcription, DNA	AT1G28310	NA	NA	Dof-type zinc finger DNA-binding family protein Dof-type zinc finger DNA-binding family protein	Potri.011G055600; Potri.011G054300; Potri.004G046600; Potri.004G046100
OG0000039	OG0000039_424	0.00717165	Potra2n11c23311	Bpev01.c0896.g0007.m0001	FUN_013010-T1	PA_chr09_G001556	PS_chr08_G035003	PS_chr02_G006060	GO:0003677; GO:0005634; GO:0006355	DNA binding; nucleus; regulation of transcription, DNA	AT1G28310	NA	NA	Dof-type zinc finger DNA-binding family protein Dof-type zinc finger DNA-binding family protein	Potri.011G055600; Potri.011G054300; Potri.004G046600; Potri.004G046100
OG0000039	OG0000039_425	0.00672535	Potra2n11c23311	Bpev01.c0962.g0013.m0001	FUN_013010-T1	PA_chr09_G001556	PS_chr08_G035003	PS_chr02_G006060	GO:0003677; GO:0005634; GO:0006355	DNA binding; nucleus; regulation of transcription, DNA	AT1G28310	NA	NA	Dof-type zinc finger DNA-binding family protein Dof-type zinc finger DNA-binding family protein	Potri.011G055600; Potri.011G054300; Potri.004G046600; Potri.004G046100
OG0000039	OG0000039_426	0.00672538	Potra2n11c23311	Bpev01.c0155.g0052.m0001	FUN_013010-T1	PA_chr09_G001556	PS_chr08_G035003	PS_chr02_G006060	GO:0003677; GO:0005634; GO:0006355	DNA binding; nucleus; regulation of transcription, DNA	AT1G28310	NA	NA	Dof-type zinc finger DNA-binding family protein Dof-type zinc finger DNA-binding family protein	Potri.011G055600; Potri.011G054300; Potri.004G046600; Potri.004G046100
OG0000039	OG0000039_427	0.0126065	Potra2n11c23311	Bpev01.c0368.g0007.m0001	FUN_013010-T1	PA_chr09_G001556	PS_chr08_G035003	PS_chr02_G006060	GO:0003677; GO:0005634; GO:0006355	DNA binding; nucleus; regulation of transcription, DNA	AT1G28310	NA	NA	Dof-type zinc finger DNA-binding family protein Dof-type zinc finger DNA-binding family protein	Potri.011G055600; Potri.011G054300; Potri.004G046600; Potri.004G046100
OG0000039	OG0000039_428	0.00672551	Potra2n11c23311	Bpev01.c0188.g0017.m0001	FUN_013010-T1	PA_chr09_G001556	PS_chr08_G035003	PS_chr02_G006060	GO:0003677; GO:0005634; GO:0006355	DNA binding; nucleus; regulation of transcription, DNA	AT1G28310	NA	NA	Dof-type zinc finger DNA-binding family protein Dof-type zinc finger DNA-binding family protein	Potri.011G055600; Potri.011G054300; Potri.004G046600; Potri.004G046100
OG0000039	OG0000039_429	0.0100575	Potra2n11c23311	Bpev01.c0030.g0036.m0001	FUN_026351-T1	PA_chr09_G001556	PS_chr08_G035003	PS_chr09_G038070	GO:0003677; GO:0005634; GO:0006355	DNA binding; nucleus; regulation of transcription, DNA	AT1G28310	NA	NA	Dof-type zinc finger DNA-binding family protein Dof-type zinc finger DNA-binding family protein	Potri.011G055600; Potri.011G054300; Potri.004G046600; Potri.004G046100
OG0000039	OG0000039_430	0.0105193	Potra2n11c23311	Bpev01.c0896.g0007.m0001	FUN_026351-T1	PA_chr09_G001556	PS_chr08_G035003	PS_chr09_G038070	GO:0003677; GO:0005634; GO:0006355	DNA binding; nucleus; regulation of transcription, DNA	AT1G28310	NA	NA	Dof-type zinc finger DNA-binding family protein Dof-type zinc finger DNA-binding family protein	Potri.011G055600; Potri.011G054300; Potri.004G046600; Potri.004G046100
OG0000039	OG0000039_431	0.00697785	Potra2n11c23311	Bpev01.c0188.g0017.m0001	FUN_026351-T1	PA_chr09_G001556	PS_chr08_G035003	PS_chr09_G038070	GO:0003677; GO:0005634; GO:0006355	DNA binding; nucleus; regulation of transcription, DNA	AT1G28310	NA	NA	Dof-type zinc finger DNA-binding family protein Dof-type zinc finger DNA-binding family protein	Potri.011G055600; Potri.011G054300; Potri.004G046600; Potri.004G046100
OG0000039	OG0000039_432	0.0111692	Potra2n11c23311	Bpev01.c0155.g0052.m0001	FUN_026351-T1	PA_chr09_G001556	PS_chr08_G035003	PS_chr09_G038070	GO:0003677; GO:0005634; GO:0006355	DNA binding; nucleus; regulation of transcription, DNA	AT1G28310	NA	NA	Dof-type zinc finger DNA-binding family protein Dof-type zinc finger DNA-binding family protein	Potri.011G055600; Potri.011G054300; Potri.004G046600; Potri.004G046100
OG0000039	OG0000039_433	0.00696919	Potra2n11c23311	Bpev01.c0962.g0013.m0001	FUN_026351-T1	PA_chr09_G001556	PS_chr08_G035003	PS_chr09_G038070	GO:0003677; GO:0005634; GO:0006355	DNA binding; nucleus; regulation of transcription, DNA	AT1G28310	NA	NA	Dof-type zinc finger DNA-binding family protein Dof-type zinc finger DNA-binding family protein	Potri.011G055600; Potri.011G054300; Potri.004G046600; Potri.004G046100
OG0000039	OG0000039_434	0.00699185	Potra2n11c23311	Bpev01.c0618.g0004.m0001	FUN_026351-T1	PA_chr09_G001556	PS_chr08_G035003	PS_chr09_G038070	GO:0003677; GO:0005634; GO:0006355	DNA binding; nucleus; regulation of transcription, DNA	AT1G28310	NA	NA	Dof-type zinc finger DNA-binding family protein Dof-type zinc finger DNA-binding family protein	Potri.011G055600; Potri.011G054300; Potri.004G046600; Potri.004G046100
OG0000039	OG0000039_435	0.0147025	Potra2n11c23311	Bpev01.c0368.g0007.m0001	FUN_026351-T1	PA_chr09_G001556	PS_chr08_G035003	PS_chr09_G038070	GO:0003677; GO:0005634; GO:0006355	DNA binding; nucleus; regulation of transcription, DNA	AT1G28310	NA	NA	Dof-type zinc finger DNA-binding family protein Dof-type zinc finger DNA-binding family protein	Potri.011G055600; Potri.011G054300; Potri.004G046600; Potri.004G046100
OG0000039	OG0000039_436	0.00697416	Potra2n11c23311	Bpev01.c0030.g0036.m0001	FUN_021863-T1	PA_chr09_G001556	PS_chr08_G035003	PS_chr09_G038070	GO:0003677; GO:0005634; GO:0006355	DNA binding; nucleus; regulation of transcription, DNA	AT1G28310	NA	NA	Dof-type zinc finger DNA-binding family protein Dof-type zinc finger DNA-binding family protein	Potri.011G055600; Potri.011G054300; Potri.004G046600; Potri.004G046100
OG0000039	OG0000039_437	0.00696931	Potra2n11c23311	Bpev01.c0896.g0007.m0001	FUN_021863-T1	PA_chr09_G001556	PS_chr08_G035003	PS_chr09_G038070	GO:0003677; GO:0005634; GO:0006355	DNA binding; nucleus; regulation of transcription, DNA	AT1G28310	NA	NA	Dof-type zinc finger DNA-binding family protein Dof-type zinc finger DNA-binding family protein	Potri.011G055600; Potri.011G054300; Potri.004G046600; Potri.004G046100
OG0000039	OG0000039_438	0.0151382	Potra2n11c23311	Bpev01.c0962.g0013.m0001	FUN_021863-T1	PA_chr09_G001556	PS_chr08_G035003	PS_chr09_G038070	GO:0003677; GO:0005634; GO:0006355	DNA binding; nucleus; regulation of transcription, DNA	AT1G28310	NA	NA	Dof-type zinc finger DNA-binding family protein Dof-type zinc finger DNA-binding family protein	Potri.011G055600; Potri.011G054300; Potri.004G046600; Potri.004G046100
OG0000039	OG0000039_439	0.00739824	Potra2n11c23311	Bpev01.c0155.g0052.m0001	FUN_021863-T1	PA_chr09_G001556	PS_chr08_G035003	PS_chr09_G038070	GO:0003677; GO:0005634; GO:0006355	DNA binding; nucleus; regulation of transcription, DNA	AT1G28310	NA	NA	Dof-type zinc finger DNA-binding family protein Dof-type zinc finger DNA-binding family protein	Potri.011G055600; Potri.011G054300; Potri.004G046600; Potri.004G046100
OG0000039	OG0000039_440	0.00697164	Potra2n11c23311	Bpev01.c0188.g0017.m0001	FUN_021863-T1	PA_chr09_G001556	PS_chr08_G035003	PS_chr09_G038070	GO:0003677; GO:0005634; GO:0006355	DNA binding; nucleus; regulation of transcription, DNA	AT1G28310	NA	NA	Dof-type zinc finger DNA-binding family protein Dof-type zinc finger DNA-binding family protein	Potri.011G055600; Potri.011G054300; Potri.004G046600; Potri.004G046100
OG0000039	OG0000039_441	0.00697439	Potra2n11c23311	Bpev01.c0030.g0036.m0001	FUN_019322-T1	PA_chr09_G001556	PS_chr08_G035003	PS_chr09_G038070	GO:0003677; GO:0005634; GO:0006355	DNA binding; nucleus; regulation of transcription, DNA	AT1G28310	NA	NA	Dof-type zinc finger DNA-binding family protein Dof-type zinc finger DNA-binding family protein	Potri.011G055600; Potri.011G054300; Potri.004G046600; Potri.004G046100
OG0000039	OG0000039_442	0.00696954	Potra2n11c23311	Bpev01.c0896.g0007.m0001	FUN_019322-T1	PA_chr09_G001556	PS_chr08_G035003	PS_chr09_G038070	GO:0003677; GO:0005634; GO:0006355	DNA binding; nucleus; regulation of transcription, DNA	AT1G28310	NA	NA	Dof-type zinc finger DNA-binding family protein Dof-type zinc finger DNA-binding family protein	Potri.011G055600; Potri.011G054300; Potri.004G046600; Potri.004G046100
OG0000039	OG0000039_443	0.0108981	Potra2n11c23311	Bpev01.c0962.g0013.m0001	FUN_019322-T1	PA_chr09_G001556	PS_chr08_G035003	PS_chr09_G038070	GO:0003677; GO:0005634; GO:0006355	DNA binding; nucleus; regulation of transcription, DNA	AT1G28310	NA	NA	Dof-type zinc finger DNA-binding family protein Dof-type zinc finger DNA-binding family protein	Potri.011G055600; Potri.011G054300; Potri.004G046600; Potri.004G046100
OG0000039	OG0000039_444	0.00720311	Potra2n11c23311	Bpev01.c0155.g0052.m0001	FUN_019322-T1	PA_chr09_G001556	PS_chr08_G035003	PS_chr09_G038070	GO:0003677; GO:0005634; GO:0006355	DNA binding; nucleus; regulation of transcription, DNA	AT1G28310	NA	NA	Dof-type zinc finger DNA-binding family protein Dof-type zinc finger DNA-binding family protein	Potri.011G055600; Potri.011G054300; Potri.004G046600; Potri.004G046100
OG0000039	OG0000039_445	0.0128528	Potra2n11c23311	Bpev01.c0368.g0007.m0001	FUN_019322-T1	PA_chr09_G001556	PS_chr08_G035003	PS_chr09_G038070	GO:0003677; GO:0005634; GO:0006355	DNA binding; nucleus; regulation of transcription, DNA	AT1G28310	NA	NA	Dof-type zinc finger DNA-binding family protein Dof-type zinc finger DNA-binding family protein	Potri.011G055600; Potri.011G054300; Potri.004G046600; Potri.004G046100
OG0000039	OG0000039_446	0.0133648	Potra2n11c23311	Bpev01.c0618.g0004.m0001	FUN_019322-T1	PA_chr09_G001556	PS_chr08_G035003	PS_chr09_G038070	GO:0003677; GO:0005634; GO:0006355	DNA binding; nucleus; regulation of transcription, DNA	AT1G28310	NA	NA	Dof-type zinc finger DNA-binding family protein Dof-type zinc finger DNA-binding family protein	Potri.011G055600; Potri.011G054300; Potri.004G046600; Potri.004G046100
OG0000039	OG0000039_447	0.00724311	Potra2n11c23311	Bpev01.c0188.g0017.m0001	FUN_019322-T1	PA_chr09_G001556	PS_chr08_G035003	PS_chr09_G038070	GO:0003677; GO:0005634; GO:0006355	DNA binding; nucleus; regulation of transcription, DNA	AT1G28310	NA	NA	Dof-type zinc finger DNA-binding family protein Dof-type zinc finger DNA-binding family protein	Potri.011G055600; Potri.011G054300; Potri.004G046600; Potri.004G046100
OG0000039	OG0000039_448	0.00698677	Potra2n11c23311	Bpev01.c0030.g0036.m0001	FUN_032079-T1	PA_chr09_G001556	PS_chr08_G035003	PS_chr09_G038070	GO:0003677; GO:0005634; GO:0006355	DNA binding; nucleus; regulation of transcription, DNA	AT1G28310	NA	NA	Dof-type zinc finger DNA-binding family protein Dof-type zinc finger DNA-binding family protein	Potri.011G055600; Potri.011G054300; Potri.004G046600; Potri.004G046100
OG0000039	OG0000039_449	0.00698192	Potra2n11c23311	Bpev01.c0896.g0007.m0001	FUN_032079-T1	PA_chr09_G001556	PS_chr08_G035003	PS_chr09_G038070	GO:0003677; GO:0005634; GO:0006355	DNA binding; nucleus; regulation of transcription, DNA	AT1G28310	NA	NA	Dof-type zinc finger DNA-binding family protein Dof-type zinc finger DNA-binding family protein	Potri.011G055600; Potri.011G054300; Potri.004G046600; Potri.004G046100
OG0000039	OG0000039_450	0.0157801	Potra2n11c23311	Bpev01.c0962.g0013.m0001	FUN_032079-T1	PA_chr09_G001556	PS_chr08_G035003	PS_chr09_G038070	GO:0003677; GO:0005634; GO:0006355	DNA binding; nucleus; regulation of transcription, DNA	AT1G28310	NA	NA	Dof-type zinc finger DNA-binding family protein Dof-type zinc finger DNA-binding family protein	Potri.011G055600; Potri.011G054300; Potri.004G046600; Potri.004G046100
OG0000039	OG0000039_451	0.00786015	Potra2n11c23311	Bpev01.c0155.g0052.m0001	FUN_032079-T1	PA_chr09_G001556	PS_chr08_G035003	PS_chr09_G038070	GO:0003677; GO:0005634; GO:0006355	DNA binding; nucleus; regulation of transcription, DNA	AT1G28310	NA	NA	Dof-type zinc finger DNA-binding family protein Dof-type zinc finger DNA-binding family protein	Potri.011G055600; Potri.011G054300; Potri.004G046600; Potri.004G046100
OG0000039	OG0000039_452	0.0278318	Potra2n11c23311	Bpev01.c0368.g0007.m0001	FUN_032079-T1	PA_chr09_G001556	PS_chr08_G035003	PS_chr09_G038070	GO:0003677; GO:0005634; GO:0006355	DNA binding; nucleus; regulation of transcription, DNA	AT1G28310	NA	NA	Dof-type zinc finger DNA-binding family protein Dof-type zinc finger DNA-binding family protein	Potri.011G055600; Potri.011G054300; Potri.004G046600; Potri.004G046100
OG0000039	OG0000039_453	0.0139635	Potra2n11c23311	Bpev01.c0618.g0004.m0001	FUN_032079-T1	PA_chr09_G001556	PS_chr08_G035003	PS_chr09_G038070	GO:0003677; GO:0005634; GO:0006355	DNA binding; nucleus; regulation of transcription, DNA	AT1G28310	NA	NA	Dof-type zinc finger DNA-binding family protein Dof-type zinc finger DNA-binding family protein	Potri.011G055600; Potri.011G054300; Potri.004G046600; Potri.004G046100
OG0000039	OG0000039_454	0.00772515	Potra2n11c23311	Bpev01.c0188.g0017.m0001	FUN_032079-T1	PA_chr09_G001556	PS_chr08_G035003	PS_chr09_G038070	GO:0003677; GO:0005634; GO:0006355	DNA binding; nucleus; regulation of transcription, DNA	AT1G28310	NA	NA	Dof-type zinc finger DNA-binding family protein Dof-type zinc finger DNA-binding family protein	Potri.011G055600; Potri.011G054300; Potri.004G046600; Potri.004G046100
OG0000039	OG0000039_455	0.00704913	Potra2n11c23311	Bpev01.c0030.g0036.m0001	FUN_013010-T1	PA_chr09_G001556	PS_chr08_G035003	PS_chr09_G038070	GO:0003677; GO:0005634; GO:0006355	DNA binding; nucleus; regulation of transcription, DNA	AT1G28310	NA	NA	Dof-type zinc finger DNA-binding family protein Dof-type zinc finger DNA-binding family protein	Potri.011G055600; Potri.011G054300; Potri.004G046600; Potri.004G046100
OG0000039	OG0000039_456	0.00704428	Potra2n11c23311	Bpev01.c0896.g0007.m0001	FUN_013010-T1	PA_chr09_G001556	PS_chr08_G035003	PS_chr09_G038070	GO:0003677; GO:0005634; GO:0006355	DNA binding; nucleus; regulation of transcription, DNA	AT1G28310	NA	NA	Dof-type zinc finger DNA-binding family protein Dof-type zinc finger DNA-binding family protein	Potri.011G055600; Potri.011G054300; Potri.004G046600; Potri.004G046100
OG0000039	OG0000039_457	0.00704632	Potra2n11c23311	Bpev01.c0962.g0013.m0001	FUN_013010-T1	PA_chr09_G001556	PS_chr08_G035003	PS_chr09_G038070	GO:0003677; GO:0005634; GO:0006355	DNA binding; nucleus; regulation of transcription, DNA	AT1G28310	NA	NA	Dof-type zinc finger DNA-binding family protein Dof-type zinc finger DNA-binding family protein	Potri.011G055600; Potri.011G054300; Potri.004G046600; Potri.004G046100
OG0000039	OG0000039_458	0.00704632	Potra2n11c23311	Bpev01.c0155.g0052.m0001	FUN_013010-T1	PA_chr09_G001556	PS_chr08_G035003	PS_chr09_G038070	GO:0003677; GO:0005634; GO:0006355	DNA binding; nucleus; regulation of transcription, DNA	AT1G28310	NA	NA	Dof-type zinc finger DNA-binding family protein Dof-type zinc finger DNA-binding family protein	Potri.011G055600; Potri.011G054300; Potri.004G046600; Potri.004G046100
OG0000039	OG0000039_459	0.0129275	Potra2n11c23311	Bpev01.c0368.g0007.m0001	FUN_013010-T1	PA_chr09_G001556	PS_chr08_G035003	PS_chr09_G038070	GO:0003677; GO:0005634; GO:0006355	DNA binding; nucleus; regulation of transcription, DNA	AT1G28310	NA	NA	Dof-type zinc finger DNA-binding family protein Dof-type zinc finger DNA-binding family protein	Potri.011G055600; Potri.011G054300; Potri.004G046600; Potri.004G046100
OG0000039	OG0000039_460	0.00704648	Potra2n11c23311	Bpev01.c0188.g0017.m0001	FUN_013010-T1	PA_chr09_G001556	PS_chr08_G035003	PS_chr09_G038070	GO:0003677; GO:0005634; GO:0006355	DNA binding; nucleus; regulation of transcription, DNA	AT1G28310	NA	NA	Dof-type zinc finger DNA-binding family protein Dof-type zinc finger DNA-binding family protein	Potri.011G055600; Potri.011G054300; Potri.004G046600; Potri.004G046100
OG0000039	OG0000039_499	0.00733461	Potra2n3c7191	Bpev01.c0368.g0007.m0001	FUN_019322-T1	PA_chr09_G003783	PS_chr08_G035003	PS_chr02_G006060	GO:0003677; GO:0005634; GO:0006355	DNA binding; nucleus; regulation of transcription, DNA	AT4G24060	NA	NA	Dof-type zinc finger DNA-binding family protein Dof-type zinc finger DNA-binding family protein	Potri.003G144500; Potri.001G086400
OG0000039	OG0000039_500	0.00590213	Potra2n3c7191	Bpev01.c0368.g0007.m0001	FUN_019322-T1	PA_chr09_G001556	PS_chr08_G035003	PS_chr02_G006060	GO:0003677; GO:0005634; GO:0006355	DNA binding; nucleus; regulation of transcription, DNA	AT4G24060	NA	NA	Dof-type zinc finger DNA-binding family protein Dof-type zinc finger DNA-binding family protein	Potri.003G144500; Potri.001G086400
OG0000039	OG0000039_501	0.00602391	Potra2n4c8808	Bpev01.c0368.g0007.m0001	FUN_019322-T1	PA_chr09_G003783	PS_chr08_G035003	PS_chr02_G006060	GO:0003677; GO:0005634; GO:0006355	DNA binding; nucleus; regulation of transcription, DNA	AT1G28310	NA	NA	Dof-type zinc finger DNA-binding family protein Dof-type zinc finger DNA-binding family protein	Potri.011G055600; Potri.011G054300; Potri.004G046600; Potri.004G046100
OG0000039	OG0000039_502	0.00607791	Potra2n14c27144	Bpev01.c0368.g0007.m0001	FUN_019322-T1	PA_chr09_G003783	PS_chr08_G035003	PS_chr02_G006060	GO:0003677; GO:0005634; GO:0006355	DNA binding; nucleus; regulation of transcription, DNA	AT3G61850	DAG1	dof affecting germination 1	Dof-type zinc finger DNA-binding family protein Dof-type zinc finger DNA-binding family protein	Potri.014G100900; Potri.012G018700; Potri.002G174300; Potri.015G009300
OG0000039	OG0000039_503	0.0139627	Potra2n2c4829	Bpev01.c0368.g0007.m0001	FUN_019322-T1	PA_chr09_G003783	PS_chr08_G035003	PS_chr02_G006060	GO:0003677; GO:0005634; GO:0006355	DNA binding; nucleus; regulation of transcription, DNA	AT3G61850	DAG1	dof affecting germination 1	Dof-type zinc finger DNA-binding family protein Dof-type zinc finger DNA-binding family protein	Potri.014G100900; Potri.012G018700; Potri.002G174300; Potri.015G009300
OG0000039	OG0000039_504	0.00595324	Potra2n203s34938	Bpev01.c0368.g0007.m0001	FUN_019322-T1	PA_chr09_G003783	PS_chr08_G035003	PS_chr02_G006060	GO:0003677; GO:0005634; GO:0006355	DNA binding; nucleus; regulation of transcription, DNA	AT5G60200	TMO6	TARGET OF MONOPTEROS 6	TARGET OF MONOPTEROS 6 TARGET OF MONOPTEROS 6	Potri.005G134200; Potri.010G204800
OG0000039	OG0000039_505	0.00624942	Potra2n1c710	Bpev01.c0368.g0007.m0001	FUN_019322-T1	PA_chr09_G003783	PS_chr08_G035003	PS_chr02_G006060	GO:0003677; GO:0005634; GO:0006355	DNA binding; nucleus; regulation of transcription, DNA	AT4G24060	NA	NA	Dof-type zinc finger DNA-binding family protein Dof-type zinc finger DNA-binding family protein	Potri.003G144500; Potri.001G086400
OG0000039	OG0000039_506	0.0133404	Potra2n15c28772	Bpev01.c0368.g0007.m0001	FUN_019322-T1	PA_chr09_G003783	PS_chr08_G035003	PS_chr02_G006060	GO:0003677; GO:0005634; GO:0006355	DNA binding; nucleus; regulation of transcription, DNA	AT5G60850	OBP4	OBF binding protein 4	OBF binding protein 4 OBF binding protein 4	Potri.011G054300; Potri.015G048300; Potri.012G063800; Potri.004G046100
OG0000039	OG0000039_507	0.0203044	Potra2n394s35532	Bpev01.c0368.g0007.m0001	FUN_019322-T1	PA_chr09_G003783	PS_chr08_G035003	PS_chr02_G006060	GO:0003677; GO:0005634; GO:0006355	DNA binding; nucleus; regulation of transcription, DNA	AT5G60850	OBP4	OBF binding protein 4	OBF binding protein 4 OBF binding protein 4	Potri.011G054300; Potri.015G048300; Potri.012G063800; Potri.004G046100
OG0000039	OG0000039_508	0.0147211	Potra2n12c23811	Bpev01.c0368.g0007.m0001	FUN_019322-T1	PA_chr09_G003783	PS_chr08_G035003	PS_chr02_G006060	GO:0003677; GO:0005634; GO:0006355	DNA binding; nucleus; regulation of transcription, DNA	AT3G61850	DAG1	dof affecting germination 1	Dof-type zinc finger DNA-binding family protein Dof-type zinc finger DNA-binding family protein	Potri.014G100900; Potri.012G018700; Potri.002G174300; Potri.015G009300
OG0000039	OG0000039_509	0.00602391	Potra2n4c8808	Bpev01.c0368.g0007.m0001	FUN_019322-T1	PA_chr08_G003418	PS_chr08_G035003	PS_chr02_G006060	GO:0003677; GO:0005634; GO:0006355	DNA binding; nucleus; regulation of transcription, DNA	AT1G28310	NA	NA	Dof-type zinc finger DNA-binding family protein Dof-type zinc finger DNA-binding family protein	Potri.011G055600; Potri.011G054300; Potri.004G046600; Potri.004G046100
OG0000039	OG0000039_510	0.00593824	Potra2n14c27144	Bpev01.c0368.g0007.m0001	FUN_019322-T1	PA_chr08_G003418	PS_chr08_G035003	PS_chr02_G006060	GO:0003677; GO:0005634; GO:0006355	DNA binding; nucleus; regulation of transcription, DNA	AT3G61850	DAG1	dof affecting germination 1	Dof-type zinc finger DNA-binding family protein Dof-type zinc finger DNA-binding family protein	Potri.014G100900; Potri.012G018700; Potri.002G174300; Potri.015G009300
OG0000039	OG0000039_511	0.0139628	Potra2n2c4829	Bpev01.c0368.g0007.m0001	FUN_019322-T1	PA_chr08_G003418	PS_chr08_G035003	PS_chr02_G006060	GO:0003677; GO:0005634; GO:0006355	DNA binding; nucleus; regulation of transcription, DNA	AT3G61850	DAG1	dof affecting germination 1	Dof-type zinc finger DNA-binding family protein Dof-type zinc finger DNA-binding family protein	Potri.014G100900; Potri.012G018700; Potri.002G174300; Potri.015G009300
OG0000039	OG0000039_512	0.00635624	Potra2n203s34938	Bpev01.c0368.g0007.m0001	FUN_019322-T1	PA_chr08_G003418	PS_chr08_G035003	PS_chr02_G006060	GO:0003677; GO:0005634; GO:0006355	DNA binding; nucleus; regulation of transcription, DNA	AT5G60200	TMO6	TARGET OF MONOPTEROS 6	TARGET OF MONOPTEROS 6 TARGET OF MONOPTEROS 6	Potri.005G134200; Potri.010G204800
OG0000039	OG0000039_513	0.00624942	Potra2n1c710	Bpev01.c0368.g0007.m0001	FUN_019322-T1	PA_chr08_G003418	PS_chr08_G035003	PS_chr02_G006060	GO:0003677; GO:0005634; GO:0006355	DNA binding; nucleus; regulation of transcription, DNA	AT4G24060	NA	NA	Dof-type zinc finger DNA-binding family protein Dof-type zinc finger DNA-binding family protein	Potri.003G144500; Potri.001G086400
OG0000039	OG0000039_514	0.0133404	Potra2n15c28772	Bpev01.c0368.g0007.m0001	FUN_019322-T1	PA_chr08_G003418	PS_chr08_G035003	PS_chr02_G006060	GO:0003677; GO:0005634; GO:0006355	DNA binding; nucleus; regulation of transcription, DNA	AT5G60850	OBP4	OBF binding protein 4	OBF binding protein 4 OBF binding protein 4	Potri.011G054300; Potri.015G048300; Potri.012G063800; Potri.004G046100
OG0000039	OG0000039_515	0.0203044	Potra2n394s35532	Bpev01.c0368.g0007.m0001	FUN_019322-T1	PA_chr08_G003418	PS_chr08_G035003	PS_chr02_G006060	GO:0003677; GO:0005634; GO:0006355	DNA binding; nucleus; regulation of transcription, DNA	AT5G60850	OBP4	OBF binding protein 4	OBF binding protein 4 OBF binding protein 4	Potri.011G054300; Potri.015G048300; Potri.012G063800; Potri.004G046100
OG0000039	OG0000039_516	0.0232044	Potra2n12c23811	Bpev01.c0368.g0007.m0001	FUN_019322-T1	PA_chr08_G003418	PS_chr08_G035003	PS_chr02_G006060	GO:0003677; GO:0005634; GO:0006355	DNA binding; nucleus; regulation of transcription, DNA	AT3G61850	DAG1	dof affecting germination 1	Dof-type zinc finger DNA-binding family protein Dof-type zinc finger DNA-binding family protein	Potri.014G100900; Potri.012G018700; Potri.002G174300; Potri.015G009300
OG0000039	OG0000039_517	0.0258627	Potra2n3c8126	Bpev01.c0368.g0007.m0001	FUN_019322-T1	PA_chr08_G003418	PS_chr08_G035003	PS_chr02_G006060	GO:0003677; GO:0005634; GO:0006355	DNA binding; nucleus; regulation of transcription, DNA	AT3G21270	ADOF2; DOF2	DOF zinc finger protein 2	DOF zinc finger protein 2 DOF zinc finger protein 2	Potri.003G034200; Potri.011G047500; Potri.004G038800
OG0000039	OG0000039_518	0.00641143	Potra2n4c8808	Bpev01.c0368.g0007.m0001	FUN_019322-T1	PA_chr09_G001556	PS_chr08_G035003	PS_chr02_G006060	GO:0003677; GO:0005634; GO:0006355	DNA binding; nucleus; regulation of transcription, DNA	AT1G28310	NA	NA	Dof-type zinc finger DNA-binding family protein Dof-type zinc finger DNA-binding family protein	Potri.011G055600; Potri.011G054300; Potri.004G046600; Potri.004G046100
OG0000039	OG0000039_519	0.0244836	Potra2n2c4829	Bpev01.c0368.g0007.m0001	FUN_019322-T1	PA_chr09_G001556	PS_chr08_G035003	PS_chr02_G006060	GO:0003677; GO:0005634; GO:0006355	DNA binding; nucleus; regulation of transcription, DNA	AT3G61850	DAG1	dof affecting germination 1	Dof-type zinc finger DNA-binding family protein Dof-type zinc finger DNA-binding family protein	Potri.014G100900; Potri.012G018700; Potri.002G174300; Potri.015G009300
OG0000039	OG0000039_520	0.0065886	Potra2n1c710	Bpev01.c0368.g0007.m0001	FUN_019322-T1	PA_chr09_G001556	PS_chr08_G035003	PS_chr02_G006060	GO:0003677; GO:0005634; GO:0006355	DNA binding; nucleus; regulation of transcription, DNA	AT4G24060	NA	NA	Dof-type zinc finger DNA-binding family protein Dof-type zinc finger DNA-binding family protein	Potri.003G144500; Potri.001G086400
OG0000039	OG0000039_521	0.0121779	Potra2n15c28772	Bpev01.c0368.g0007.m0001	FUN_019322-T1	PA_chr09_G001556	PS_chr08_G035003	PS_chr02_G006060	GO:0003677; GO:0005634; GO:0006355	DNA binding; nucleus; regulation of transcription, DNA	AT5G60850	OBP4	OBF binding protein 4	OBF binding protein 4 OBF binding protein 4	Potri.011G054300; Potri.015G048300; Potri.012G063800; Potri.004G046100
OG0000039	OG0000039_522	0.0203253	Potra2n394s35532	Bpev01.c0368.g0007.m0001	FUN_019322-T1	PA_chr09_G001556	PS_chr08_G035003	PS_chr02_G006060	GO:0003677; GO:0005634; GO:0006355	DNA binding; nucleus; regulation of transcription, DNA	AT5G60850	OBP4	OBF binding protein 4	OBF binding protein 4 OBF binding protein 4	Potri.011G054300; Potri.015G048300; Potri.012G063800; Potri.004G046100
OG0000039	OG0000039_523	0.00818026	Potra2n12c23811	Bpev01.c0368.g0007.m0001	FUN_019322-T1	PA_chr09_G001556	PS_chr08_G035003	PS_chr02_G006060	GO:0003677; GO:0005634; GO:0006355	DNA binding; nucleus; regulation of transcription, DNA	AT3G61850	DAG1	dof affecting germination 1	Dof-type zinc finger DNA-binding family protein Dof-type zinc finger DNA-binding family protein	Potri.014G100900; Potri.012G018700; Potri.002G174300; Potri.015G009300
OG0000039	OG0000039_524	0.0245336	Potra2n3c8126	Bpev01.c0368.g0007.m0001	FUN_019322-T1	PA_chr09_G001556	PS_chr08_G035003	PS_chr02_G006060	GO:0003677; GO:0005634; GO:0006355	DNA binding; nucleus; regulation of transcription, DNA	AT3G21270	ADOF2; DOF2	DOF zinc finger protein 2	DOF zinc finger protein 2 DOF zinc finger protein 2	Potri.003G034200; Potri.011G047500; Potri.004G038800
OG0000039	OG0000039_527	0.0139278	Potra2n4c8808	Bpev01.c0368.g0007.m0001	FUN_032079-T1	PA_chr09_G003783	PS_chr08_G035003	PS_chr02_G006060	GO:0003677; GO:0005634; GO:0006355	DNA binding; nucleus; regulation of transcription, DNA	AT1G28310	NA	NA	Dof-type zinc finger DNA-binding family protein Dof-type zinc finger DNA-binding family protein	Potri.011G055600; Potri.011G054300; Potri.004G046600; Potri.004G046100
OG0000039	OG0000039_528	0.00942183	Potra2n14c27144	Bpev01.c0368.g0007.m0001	FUN_032079-T1	PA_chr09_G003783	PS_chr08_G035003	PS_chr02_G006060	GO:0003677; GO:0005634; GO:0006355	DNA binding; nucleus; regulation of transcription, DNA	AT3G61850	DAG1	dof affecting germination 1	Dof-type zinc finger DNA-binding family protein Dof-type zinc finger DNA-binding family protein	Potri.014G100900; Potri.012G018700; Potri.002G174300; Potri.015G009300
OG0000039	OG0000039_529	0.0218667	Potra2n2c4829	Bpev01.c0368.g0007.m0001	FUN_032079-T1	PA_chr09_G003783	PS_chr08_G035003	PS_chr02_G006060	GO:0003677; GO:0005634; GO:0006355	DNA binding; nucleus; regulation of transcription, DNA	AT3G61850	DAG1	dof affecting germination 1	Dof-type zinc finger DNA-binding family protein Dof-type zinc finger DNA-binding family protein	Potri.014G100900; Potri.012G018700; Potri.002G174300; Potri.015G009300
OG0000039	OG0000039_530	0.0138572	Potra2n203s34938	Bpev01.c0368.g0007.m0001	FUN_032079-T1	PA_chr09_G003783	PS_chr08_G035003	PS_chr02_G006060	GO:0003677; GO:0005634; GO:0006355	DNA binding; nucleus; regulation of transcription, DNA	AT5G60200	TMO6	TARGET OF MONOPTEROS 6	TARGET OF MONOPTEROS 6 TARGET OF MONOPTEROS 6	Potri.005G134200; Potri.010G204800
OG0000039	OG0000039_535	0.0139278	Potra2n4c8808	Bpev01.c0368.g0007.m0001	FUN_032079-T1	PA_chr08_G003418	PS_chr08_G035003	PS_chr02_G006060	GO:0003677; GO:0005634; GO:0006355	DNA binding; nucleus; regulation of transcription, DNA	AT1G28310	NA	NA	Dof-type zinc finger DNA-binding family protein Dof-type zinc finger DNA-binding family protein	Potri.011G055600; Potri.011G054300; Potri.004G046600; Potri.004G046100
OG0000039	OG0000039_536	0.00928216	Potra2n14c27144	Bpev01.c0368.g0007.m0001	FUN_032079-T1	PA_chr08_G003418	PS_chr08_G035003	PS_chr02_G006060	GO:0003677; GO:0005634; GO:0006355	DNA binding; nucleus; regulation of transcription, DNA	AT3G61850	DAG1	dof affecting germination 1	Dof-type zinc finger DNA-binding family protein Dof-type zinc finger DNA-binding family protein	Potri.014G100900; Potri.012G018700; Potri.002G174300; Potri.015G009300
OG0000039	OG0000039_537	0.0218667	Potra2n2c4829	Bpev01.c0368.g0007.m0001	FUN_032079-T1	PA_chr08_G003418	PS_chr08_G035003	PS_chr02_G006060	GO:0003677; GO:0005634; GO:0006355	DNA binding; nucleus; regulation of transcription, DNA	AT3G61850	DAG1	dof affecting germination 1	Dof-type zinc finger DNA-binding family protein Dof-type zinc finger DNA-binding family protein	Potri.014G100900; Potri.012G018700; Potri.002G174300; Potri.015G009300
OG0000039	OG0000039_538	0.0142602	Potra2n203s34938	Bpev01.c0368.g0007.m0001	FUN_032079-T1	PA_chr08_G003418	PS_chr08_G035003	PS_chr02_G006060	GO:0003677; GO:0005634; GO:0006355	DNA binding; nucleus; regulation of transcription, DNA	AT5G60200	TMO6	TARGET OF MONOPTEROS 6	TARGET OF MONOPTEROS 6 TARGET OF MONOPTEROS 6	Potri.005G134200; Potri.010G204800
OG0000039	OG0000039_543	0.0282617	Potra2n3c8126	Bpev01.c0368.g0007.m0001	FUN_032079-T1	PA_chr08_G003418	PS_chr08_G035003	PS_chr02_G006060	GO:0003677; GO:0005634; GO:0006355	DNA binding; nucleus; regulation of transcription, DNA	AT3G21270	ADOF2; DOF2	DOF zinc finger protein 2	DOF zinc finger protein 2 DOF zinc finger protein 2	Potri.003G034200; Potri.011G047500; Potri.004G038800
OG0000039	OG0000039_544	0.0181987	Potra2n4c8808	Bpev01.c0368.g0007.m0001	FUN_032079-T1	PA_chr09_G001556	PS_chr08_G035003	PS_chr02_G006060	GO:0003677; GO:0005634; GO:0006355	DNA binding; nucleus; regulation of transcription, DNA	AT1G28310	NA	NA	Dof-type zinc finger DNA-binding family protein Dof-type zinc finger DNA-binding family protein	Potri.011G055600; Potri.011G054300; Potri.004G046600; Potri.004G046100
OG0000039	OG0000039_545	0.0362709	Potra2n2c4829	Bpev01.c0368.g0007.m0001	FUN_032079-T1	PA_chr09_G001556	PS_chr08_G035003	PS_chr02_G006060	GO:0003677; GO:0005634; GO:0006355	DNA binding; nucleus; regulation of transcription, DNA	AT3G61850	DAG1	dof affecting germination 1	Dof-type zinc finger DNA-binding family protein Dof-type zinc finger DNA-binding family protein	Potri.014G100900; Potri.012G018700; Potri.002G174300; Potri.015G009300
OG0000039	OG0000039_546	0.00896252	Potra2n1c710	Bpev01.c0368.g0007.m0001	FUN_032079-T1	PA_chr09_G001556	PS_chr08_G035003	PS_chr02_G006060	GO:0003677; GO:0005634; GO:0006355	DNA binding; nucleus; regulation of transcription, DNA	AT4G24060	NA	NA	Dof-type zinc finger DNA-binding family protein Dof-type zinc finger DNA-binding family protein	Potri.003G144500; Potri.001G086400
OG0000039	OG0000039_547	0.0239652	Potra2n15c28772	Bpev01.c0368.g0007.m0001	FUN_032079-T1	PA_chr09_G001556	PS_chr08_G035003	PS_chr02_G006060	GO:0003677; GO:0005634; GO:0006355	DNA binding; nucleus; regulation of transcription, DNA	AT5G60850	OBP4	OBF binding protein 4	OBF binding protein 4 OBF binding protein 4	Potri.011G054300; Potri.015G048300; Potri.012G063800; Potri.004G046100
OG0000039	OG0000039_550	0.0269325	Potra2n3c8126	Bpev01.c0368.g0007.m0001	FUN_032079-T1	PA_chr09_G001556	PS_chr08_G035003	PS_chr02_G006060	GO:0003677; GO:0005634; GO:0006355	DNA binding; nucleus; regulation of transcription, DNA	AT3G21270	ADOF2; DOF2	DOF zinc finger protein 2	DOF zinc finger protein 2 DOF zinc finger protein 2	Potri.003G034200; Potri.011G047500; Potri.004G038800
OG0000039	OG0000039_551	0.0060114	Potra2n4c8808	Bpev01.c0368.g0007.m0001	FUN_013010-T1	PA_chr09_G003783	PS_chr08_G035003	PS_chr02_G006060	GO:0003677; GO:0005634; GO:0006355	DNA binding; nucleus; regulation of transcription, DNA	AT1G28310	NA	NA	Dof-type zinc finger DNA-binding family protein Dof-type zinc finger DNA-binding family protein	Potri.011G055600; Potri.011G054300; Potri.004G046600; Potri.004G046100
OG0000039	OG0000039_552	0.00606539	Potra2n14c27144	Bpev01.c0368.g0007.m0001	FUN_013010-T1	PA_chr09_G003783	PS_chr08_G035003	PS_chr02_G006060	GO:0003677; GO:0005634; GO:0006355	DNA binding; nucleus; regulation of transcription, DNA	AT3G61850	DAG1	dof affecting germination 1	Dof-type zinc finger DNA-binding family protein Dof-type zinc finger DNA-binding family protein	Potri.014G100900; Potri.012G018700; Potri.002G174300; Potri.015G009300
OG0000039	OG0000039_553	0.0139502	Potra2n2c4829	Bpev01.c0368.g0007.m0001	FUN_013010-T1	PA_chr09_G003783	PS_chr08_G035003	PS_chr02_G006060	GO:0003677; GO:0005634; GO:0006355	DNA binding; nucleus; regulation of transcription, DNA	AT3G61850	DAG1	dof affecting germination 1	Dof-type zinc finger DNA-binding family protein Dof-type zinc finger DNA-binding family protein	Potri.014G100900; Potri.012G018700; Potri.002G174300; Potri.015G009300
OG0000039	OG0000039_554	0.0062369	Potra2n1c710	Bpev01.c0368.g0007.m0001	FUN_013010-T1	PA_chr09_G003783	PS_chr08_G035003	PS_chr02_G006060	GO:0003677; GO:0005634; GO:0006355	DNA binding; nucleus; regulation of transcription, DNA	AT4G24060	NA	NA	Dof-type zinc finger DNA-binding family protein Dof-type zinc finger DNA-binding family protein	Potri.003G144500; Potri.001G086400
OG0000039	OG0000039_558	0.0060114	Potra2n4c8808	Bpev01.c0368.g0007.m0001	FUN_013010-T1	PA_chr08_G003418	PS_chr08_G035003	PS_chr02_G006060	GO:0003677; GO:0005634; GO:0006355	DNA binding; nucleus; regulation of transcription, DNA	AT1G28310	NA	NA	Dof-type zinc finger DNA-binding family protein Dof-type zinc finger DNA-binding family protein	Potri.011G055600; Potri.011G054300; Potri.004G046600; Potri.004G046100
OG0000039	OG0000039_559	0.00592573	Potra2n14c27144	Bpev01.c0368.g0007.m0001	FUN_013010-T1	PA_chr08_G003418	PS_chr08_G035003	PS_chr02_G006060	GO:0003677; GO:0005634; GO:0006355	DNA binding; nucleus; regulation of transcription, DNA	AT3G61850	DAG1	dof affecting germination 1	Dof-type zinc finger DNA-binding family protein Dof-type zinc finger DNA-binding family protein	Potri.014G100900; Potri.012G018700; Potri.002G174300; Potri.015G009300
OG0000039	OG0000039_560	0.0139502	Potra2n2c4829	Bpev01.c0368.g0007.m0001	FUN_013010-T1	PA_chr08_G003418	PS_chr08_G035003	PS_chr02_G006060	GO:0003677; GO:0005634; GO:0006355	DNA binding; nucleus; regulation of transcription, DNA	AT3G61850	DAG1	dof affecting germination 1	Dof-type zinc finger DNA-binding family protein Dof-type zinc finger DNA-binding family protein	Potri.014G100900; Potri.012G018700; Potri.002G174300; Potri.015G009300
OG0000039	OG0000039_561	0.0062369	Potra2n1c710	Bpev01.c0368.g0007.m0001	FUN_013010-T1	PA_chr08_G003418	PS_chr08_G035003	PS_chr02_G006060	GO:0003677; GO:0005634; GO:0006355	DNA binding; nucleus; regulation of transcription, DNA	AT4G24060	NA	NA	Dof-type zinc finger DNA-binding family protein Dof-type zinc finger DNA-binding family protein	Potri.003G144500; Potri.001G086400
OG0000039	OG0000039_565	0.0258502	Potra2n3c8126	Bpev01.c0368.g0007.m0001	FUN_013010-T1	PA_chr08_G003418	PS_chr08_G035003	PS_chr02_G006060	GO:0003677; GO:0005634; GO:0006355	DNA binding; nucleus; regulation of transcription, DNA	AT3G21270	ADOF2; DOF2	DOF zinc finger protein 2	DOF zinc finger protein 2 DOF zinc finger protein 2	Potri.003G034200; Potri.011G047500; Potri.004G038800
OG0000039	OG0000039_566	0.00639891	Potra2n4c8808	Bpev01.c0368.g0007.m0001	FUN_013010-T1	PA_chr09_G001556	PS_chr08_G035003	PS_chr02_G006060	GO:0003677; GO:0005634; GO:0006355	DNA binding; nucleus; regulation of transcription, DNA	AT1G28310	NA	NA	Dof-type zinc finger DNA-binding family protein Dof-type zinc finger DNA-binding family protein	Potri.011G055600; Potri.011G054300; Potri.004G046600; Potri.004G046100
OG0000039	OG0000039_567	0.0244711	Potra2n2c4829	Bpev01.c0368.g0007.m0001	FUN_013010-T1	PA_chr09_G001556	PS_chr08_G035003	PS_chr02_G006060	GO:0003677; GO:0005634; GO:0006355	DNA binding; nucleus; regulation of transcription, DNA	AT3G61850	DAG1	dof affecting germination 1	Dof-type zinc finger DNA-binding family protein Dof-type zinc finger DNA-binding family protein	Potri.014G100900; Potri.012G018700; Potri.002G174300; Potri.015G009300
OG0000039	OG0000039_568	0.00657608	Potra2n1c710	Bpev01.c0368.g0007.m0001	FUN_013010-T1	PA_chr09_G001556	PS_chr08_G035003	PS_chr02_G006060	GO:0003677; GO:0005634; GO:0006355	DNA binding; nucleus; regulation of transcription, DNA	AT4G24060	NA	NA	Dof-type zinc finger DNA-binding family protein Dof-type zinc finger DNA-binding family protein	Potri.003G144500; Potri.001G086400
OG0000039	OG0000039_569	0.0121654	Potra2n15c28772	Bpev01.c0368.g0007.m0001	FUN_013010-T1	PA_chr09_G001556	PS_chr08_G035003	PS_chr02_G006060	GO:0003677; GO:0005634; GO:0006355	DNA binding; nucleus; regulation of transcription, DNA	AT5G60850	OBP4	OBF binding protein 4	OBF binding protein 4 OBF binding protein 4	Potri.011G054300; Potri.015G048300; Potri.012G063800; Potri.004G046100
OG0000039	OG0000039_570	0.0203127	Potra2n394s35532	Bpev01.c0368.g0007.m0001	FUN_013010-T1	PA_chr09_G001556	PS_chr08_G035003	PS_chr02_G006060	GO:0003677; GO:0005634; GO:0006355	DNA binding; nucleus; regulation of transcription, DNA	AT5G60850	OBP4	OBF binding protein 4	OBF binding protein 4 OBF binding protein 4	Potri.011G054300; Potri.015G048300; Potri.012G063800; Potri.004G046100
OG0000039	OG0000039_571	0.00816775	Potra2n12c23811	Bpev01.c0368.g0007.m0001	FUN_013010-T1	PA_chr09_G001556	PS_chr08_G035003	PS_chr02_G006060	GO:0003677; GO:0005634; GO:0006355	DNA binding; nucleus; regulation of transcription, DNA	AT3G61850	DAG1	dof affecting germination 1	Dof-type zinc finger DNA-binding family protein Dof-type zinc finger DNA-binding family protein	Potri.014G100900; Potri.012G018700; Potri.002G174300; Potri.015G009300
OG0000039	OG0000039_572	0.0245211	Potra2n3c8126	Bpev01.c0368.g0007.m0001	FUN_013010-T1	PA_chr09_G001556	PS_chr08_G035003	PS_chr02_G006060	GO:0003677; GO:0005634; GO:0006355	DNA binding; nucleus; regulation of transcription, DNA	AT3G21270	ADOF2; DOF2	DOF zinc finger protein 2	DOF zinc finger protein 2 DOF zinc finger protein 2	Potri.003G034200; Potri.011G047500; Potri.004G038800
OG0000039	OG0000039_573	0.0158001	Potra2n2c4829	Bpev01.c0368.g0007.m0001	FUN_026351-T1	PA_chr09_G003783	PS_chr08_G035003	PS_chr02_G006060	GO:0003677; GO:0005634; GO:0006355	DNA binding; nucleus; regulation of transcription, DNA	AT3G61850	DAG1	dof affecting germination 1	Dof-type zinc finger DNA-binding family protein Dof-type zinc finger DNA-binding family protein	Potri.014G100900; Potri.012G018700; Potri.002G174300; Potri.015G009300
OG0000039	OG0000039_574	0.0080868	Potra2n1c710	Bpev01.c0368.g0007.m0001	FUN_026351-T1	PA_chr09_G003783	PS_chr08_G035003	PS_chr02_G006060	GO:0003677; GO:0005634; GO:0006355	DNA binding; nucleus; regulation of transcription, DNA	AT4G24060	NA	NA	Dof-type zinc finger DNA-binding family protein Dof-type zinc finger DNA-binding family protein	Potri.003G144500; Potri.001G086400
OG0000039	OG0000039_584	0.0277001	Potra2n3c8126	Bpev01.c0368.g0007.m0001	FUN_026351-T1	PA_chr08_G003418	PS_chr08_G035003	PS_chr02_G006060	GO:0003677; GO:0005634; GO:0006355	DNA binding; nucleus; regulation of transcription, DNA	AT3G21270	ADOF2; DOF2	DOF zinc finger protein 2	DOF zinc finger protein 2 DOF zinc finger protein 2	Potri.003G034200; Potri.011G047500; Potri.004G038800
OG0000039	OG0000039_585	0.026321	Potra2n2c4829	Bpev01.c0368.g0007.m0001	FUN_026351-T1	PA_chr09_G001556	PS_chr08_G035003	PS_chr02_G006060	GO:0003677; GO:0005634; GO:0006355	DNA binding; nucleus; regulation of transcription, DNA	AT3G61850	DAG1	dof affecting germination 1	Dof-type zinc finger DNA-binding family protein Dof-type zinc finger DNA-binding family protein	Potri.014G100900; Potri.012G018700; Potri.002G174300; Potri.015G009300
OG0000039	OG0000039_586	0.00842598	Potra2n1c710	Bpev01.c0368.g0007.m0001	FUN_026351-T1	PA_chr09_G001556	PS_chr08_G035003	PS_chr02_G006060	GO:0003677; GO:0005634; GO:0006355	DNA binding; nucleus; regulation of transcription, DNA	AT4G24060	NA	NA	Dof-type zinc finger DNA-binding family protein Dof-type zinc finger DNA-binding family protein	Potri.003G144500; Potri.001G086400
OG0000039	OG0000039_587	0.0140153	Potra2n15c28772	Bpev01.c0368.g0007.m0001	FUN_026351-T1	PA_chr09_G001556	PS_chr08_G035003	PS_chr02_G006060	GO:0003677; GO:0005634; GO:0006355	DNA binding; nucleus; regulation of transcription, DNA	AT5G60850	OBP4	OBF binding protein 4	OBF binding protein 4 OBF binding protein 4	Potri.011G054300; Potri.015G048300; Potri.012G063800; Potri.004G046100
OG0000039	OG0000039_588	0.0221626	Potra2n394s35532	Bpev01.c0368.g0007.m0001	FUN_026351-T1	PA_chr09_G001556	PS_chr08_G035003	PS_chr02_G006060	GO:0003677; GO:0005634; GO:0006355	DNA binding; nucleus; regulation of transcription, DNA	AT5G60850	OBP4	OBF binding protein 4	OBF binding protein 4 OBF binding protein 4	Potri.011G054300; Potri.015G048300; Potri.012G063800; Potri.004G046100
OG0000039	OG0000039_589	0.0100176	Potra2n12c23811	Bpev01.c0368.g0007.m0001	FUN_026351-T1	PA_chr09_G001556	PS_chr08_G035003	PS_chr02_G006060	GO:0003677; GO:0005634; GO:0006355	DNA binding; nucleus; regulation of transcription, DNA	AT3G61850	DAG1	dof affecting germination 1	Dof-type zinc finger DNA-binding family protein Dof-type zinc finger DNA-binding family protein	Potri.014G100900; Potri.012G018700; Potri.002G174300; Potri.015G009300
OG0000039	OG0000039_590	0.026371	Potra2n3c8126	Bpev01.c0368.g0007.m0001	FUN_026351-T1	PA_chr09_G001556	PS_chr08_G035003	PS_chr02_G006060	GO:0003677; GO:0005634; GO:0006355	DNA binding; nucleus; regulation of transcription, DNA	AT3G21270	ADOF2; DOF2	DOF zinc finger protein 2	DOF zinc finger protein 2 DOF zinc finger protein 2	Potri.003G034200; Potri.011G047500; Potri.004G038800
OG0000039	OG0000039_591	0.00773952	Potra2n3c7191	Bpev01.c0368.g0007.m0001	FUN_026351-T1	PA_chr09_G001556	PS_chr08_G035003	PS_chr02_G006060	GO:0003677; GO:0005634; GO:0006355	DNA binding; nucleus; regulation of transcription, DNA	AT4G24060	NA	NA	Dof-type zinc finger DNA-binding family protein Dof-type zinc finger DNA-binding family protein	Potri.003G144500; Potri.001G086400
OG0000039	OG0000039_638	2.18179e-07	Potra2n4c8808	Bpev01.c0368.g0007.m0001	FUN_019322-T1	PA_chr09_G003783	PS_chr11_G045264	PS_chr08_G035003	GO:0003677; GO:0005634; GO:0006355	DNA binding; nucleus; regulation of transcription, DNA	AT1G28310	NA	NA	Dof-type zinc finger DNA-binding family protein Dof-type zinc finger DNA-binding family protein	Potri.011G055600; Potri.011G054300; Potri.004G046600; Potri.004G046100
OG0000039	OG0000039_639	2.18179e-07	Potra2n2c4829	Bpev01.c0368.g0007.m0001	FUN_019322-T1	PA_chr09_G003783	PS_chr11_G045264	PS_chr08_G035003	GO:0003677; GO:0005634; GO:0006355	DNA binding; nucleus; regulation of transcription, DNA	AT3G61850	DAG1	dof affecting germination 1	Dof-type zinc finger DNA-binding family protein Dof-type zinc finger DNA-binding family protein	Potri.014G100900; Potri.012G018700; Potri.002G174300; Potri.015G009300
OG0000039	OG0000039_640	0.00207388	Potra2n203s34938	Bpev01.c0368.g0007.m0001	FUN_019322-T1	PA_chr09_G003783	PS_chr11_G045264	PS_chr08_G035003	GO:0003677; GO:0005634; GO:0006355	DNA binding; nucleus; regulation of transcription, DNA	AT5G60200	TMO6	TARGET OF MONOPTEROS 6	TARGET OF MONOPTEROS 6 TARGET OF MONOPTEROS 6	Potri.005G134200; Potri.010G204800
OG0000039	OG0000039_641	0.000182372	Potra2n14c27144	Bpev01.c0368.g0007.m0001	FUN_019322-T1	PA_chr09_G003783	PS_chr11_G045264	PS_chr08_G035003	GO:0003677; GO:0005634; GO:0006355	DNA binding; nucleus; regulation of transcription, DNA	AT3G61850	DAG1	dof affecting germination 1	Dof-type zinc finger DNA-binding family protein Dof-type zinc finger DNA-binding family protein	Potri.014G100900; Potri.012G018700; Potri.002G174300; Potri.015G009300
OG0000039	OG0000039_642	0.0162836	Potra2n12c23811	Bpev01.c0368.g0007.m0001	FUN_019322-T1	PA_chr08_G003418	PS_chr11_G045264	PS_chr08_G035003	GO:0003677; GO:0005634; GO:0006355	DNA binding; nucleus; regulation of transcription, DNA	AT3G61850	DAG1	dof affecting germination 1	Dof-type zinc finger DNA-binding family protein Dof-type zinc finger DNA-binding family protein	Potri.014G100900; Potri.012G018700; Potri.002G174300; Potri.015G009300
OG0000039	OG0000039_643	0.0139336	Potra2n3c8126	Bpev01.c0368.g0007.m0001	FUN_019322-T1	PA_chr08_G003418	PS_chr11_G045264	PS_chr08_G035003	GO:0003677; GO:0005634; GO:0006355	DNA binding; nucleus; regulation of transcription, DNA	AT3G21270	ADOF2; DOF2	DOF zinc finger protein 2	DOF zinc finger protein 2 DOF zinc finger protein 2	Potri.003G034200; Potri.011G047500; Potri.004G038800
OG0000039	OG0000039_644	2.18176e-07	Potra2n4c8808	Bpev01.c0368.g0007.m0001	FUN_019322-T1	PA_chr08_G003418	PS_chr11_G045264	PS_chr08_G035003	GO:0003677; GO:0005634; GO:0006355	DNA binding; nucleus; regulation of transcription, DNA	AT1G28310	NA	NA	Dof-type zinc finger DNA-binding family protein Dof-type zinc finger DNA-binding family protein	Potri.011G055600; Potri.011G054300; Potri.004G046600; Potri.004G046100
OG0000039	OG0000039_645	2.27943e-07	Potra2n2c4829	Bpev01.c0368.g0007.m0001	FUN_019322-T1	PA_chr08_G003418	PS_chr11_G045264	PS_chr08_G035003	GO:0003677; GO:0005634; GO:0006355	DNA binding; nucleus; regulation of transcription, DNA	AT3G61850	DAG1	dof affecting germination 1	Dof-type zinc finger DNA-binding family protein Dof-type zinc finger DNA-binding family protein	Potri.014G100900; Potri.012G018700; Potri.002G174300; Potri.015G009300
OG0000039	OG0000039_646	1.03484e-06	Potra2n14c27144	Bpev01.c0368.g0007.m0001	FUN_019322-T1	PA_chr08_G003418	PS_chr11_G045264	PS_chr08_G035003	GO:0003677; GO:0005634; GO:0006355	DNA binding; nucleus; regulation of transcription, DNA	AT3G61850	DAG1	dof affecting germination 1	Dof-type zinc finger DNA-binding family protein Dof-type zinc finger DNA-binding family protein	Potri.014G100900; Potri.012G018700; Potri.002G174300; Potri.015G009300
OG0000039	OG0000039_647	0.00243522	Potra2n203s34938	Bpev01.c0368.g0007.m0001	FUN_019322-T1	PA_chr08_G003418	PS_chr11_G045264	PS_chr08_G035003	GO:0003677; GO:0005634; GO:0006355	DNA binding; nucleus; regulation of transcription, DNA	AT5G60200	TMO6	TARGET OF MONOPTEROS 6	TARGET OF MONOPTEROS 6 TARGET OF MONOPTEROS 6	Potri.005G134200; Potri.010G204800
OG0000039	OG0000039_648	0.011022	Potra2n12c23811	Bpev01.c0368.g0007.m0001	FUN_019322-T1	PA_chr09_G001556	PS_chr11_G045264	PS_chr08_G035003	GO:0003677; GO:0005634; GO:0006355	DNA binding; nucleus; regulation of transcription, DNA	AT3G61850	DAG1	dof affecting germination 1	Dof-type zinc finger DNA-binding family protein Dof-type zinc finger DNA-binding family protein	Potri.014G100900; Potri.012G018700; Potri.002G174300; Potri.015G009300
OG0000039	OG0000039_649	0.0101453	Potra2n3c8126	Bpev01.c0368.g0007.m0001	FUN_019322-T1	PA_chr09_G001556	PS_chr11_G045264	PS_chr08_G035003	GO:0003677; GO:0005634; GO:0006355	DNA binding; nucleus; regulation of transcription, DNA	AT3G21270	ADOF2; DOF2	DOF zinc finger protein 2	DOF zinc finger protein 2 DOF zinc finger protein 2	Potri.003G034200; Potri.011G047500; Potri.004G038800
OG0000039	OG0000039_650	0.0101502	Potra2n4c8808	Bpev01.c0368.g0007.m0001	FUN_019322-T1	PA_chr09_G001556	PS_chr11_G045264	PS_chr08_G035003	GO:0003677; GO:0005634; GO:0006355	DNA binding; nucleus; regulation of transcription, DNA	AT1G28310	NA	NA	Dof-type zinc finger DNA-binding family protein Dof-type zinc finger DNA-binding family protein	Potri.011G055600; Potri.011G054300; Potri.004G046600; Potri.004G046100
OG0000039	OG0000039_651	0.0202836	Potra2n2c4829	Bpev01.c0368.g0007.m0001	FUN_019322-T1	PA_chr09_G001556	PS_chr11_G045264	PS_chr08_G035003	GO:0003677; GO:0005634; GO:0006355	DNA binding; nucleus; regulation of transcription, DNA	AT3G61850	DAG1	dof affecting germination 1	Dof-type zinc finger DNA-binding family protein Dof-type zinc finger DNA-binding family protein	Potri.014G100900; Potri.012G018700; Potri.002G174300; Potri.015G009300
OG0000039	OG0000039_653	0.00410244	Potra2n4c8808	Bpev01.c0368.g0007.m0001	FUN_032079-T1	PA_chr09_G003783	PS_chr11_G045264	PS_chr08_G035003	GO:0003677; GO:0005634; GO:0006355	DNA binding; nucleus; regulation of transcription, DNA	AT1G28310	NA	NA	Dof-type zinc finger DNA-binding family protein Dof-type zinc finger DNA-binding family protein	Potri.011G055600; Potri.011G054300; Potri.004G046600; Potri.004G046100
OG0000039	OG0000039_654	0.00410244	Potra2n2c4829	Bpev01.c0368.g0007.m0001	FUN_032079-T1	PA_chr09_G003783	PS_chr11_G045264	PS_chr08_G035003	GO:0003677; GO:0005634; GO:0006355	DNA binding; nucleus; regulation of transcription, DNA	AT3G61850	DAG1	dof affecting germination 1	Dof-type zinc finger DNA-binding family protein Dof-type zinc finger DNA-binding family protein	Potri.014G100900; Potri.012G018700; Potri.002G174300; Potri.015G009300
OG0000039	OG0000039_655	0.00617611	Potra2n203s34938	Bpev01.c0368.g0007.m0001	FUN_032079-T1	PA_chr09_G003783	PS_chr11_G045264	PS_chr08_G035003	GO:0003677; GO:0005634; GO:0006355	DNA binding; nucleus; regulation of transcription, DNA	AT5G60200	TMO6	TARGET OF MONOPTEROS 6	TARGET OF MONOPTEROS 6 TARGET OF MONOPTEROS 6	Potri.005G134200; Potri.010G204800
OG0000039	OG0000039_656	0.00428459	Potra2n14c27144	Bpev01.c0368.g0007.m0001	FUN_032079-T1	PA_chr09_G003783	PS_chr11_G045264	PS_chr08_G035003	GO:0003677; GO:0005634; GO:0006355	DNA binding; nucleus; regulation of transcription, DNA	AT3G61850	DAG1	dof affecting germination 1	Dof-type zinc finger DNA-binding family protein Dof-type zinc finger DNA-binding family protein	Potri.014G100900; Potri.012G018700; Potri.002G174300; Potri.015G009300
OG0000039	OG0000039_658	0.0180358	Potra2n3c8126	Bpev01.c0368.g0007.m0001	FUN_032079-T1	PA_chr08_G003418	PS_chr11_G045264	PS_chr08_G035003	GO:0003677; GO:0005634; GO:0006355	DNA binding; nucleus; regulation of transcription, DNA	AT3G21270	ADOF2; DOF2	DOF zinc finger protein 2	DOF zinc finger protein 2 DOF zinc finger protein 2	Potri.003G034200; Potri.011G047500; Potri.004G038800
OG0000039	OG0000039_659	0.00410244	Potra2n4c8808	Bpev01.c0368.g0007.m0001	FUN_032079-T1	PA_chr08_G003418	PS_chr11_G045264	PS_chr08_G035003	GO:0003677; GO:0005634; GO:0006355	DNA binding; nucleus; regulation of transcription, DNA	AT1G28310	NA	NA	Dof-type zinc finger DNA-binding family protein Dof-type zinc finger DNA-binding family protein	Potri.011G055600; Potri.011G054300; Potri.004G046600; Potri.004G046100
OG0000039	OG0000039_660	0.00410245	Potra2n2c4829	Bpev01.c0368.g0007.m0001	FUN_032079-T1	PA_chr08_G003418	PS_chr11_G045264	PS_chr08_G035003	GO:0003677; GO:0005634; GO:0006355	DNA binding; nucleus; regulation of transcription, DNA	AT3G61850	DAG1	dof affecting germination 1	Dof-type zinc finger DNA-binding family protein Dof-type zinc finger DNA-binding family protein	Potri.014G100900; Potri.012G018700; Potri.002G174300; Potri.015G009300
OG0000039	OG0000039_661	0.00410326	Potra2n14c27144	Bpev01.c0368.g0007.m0001	FUN_032079-T1	PA_chr08_G003418	PS_chr11_G045264	PS_chr08_G035003	GO:0003677; GO:0005634; GO:0006355	DNA binding; nucleus; regulation of transcription, DNA	AT3G61850	DAG1	dof affecting germination 1	Dof-type zinc finger DNA-binding family protein Dof-type zinc finger DNA-binding family protein	Potri.014G100900; Potri.012G018700; Potri.002G174300; Potri.015G009300
OG0000039	OG0000039_662	0.00653744	Potra2n203s34938	Bpev01.c0368.g0007.m0001	FUN_032079-T1	PA_chr08_G003418	PS_chr11_G045264	PS_chr08_G035003	GO:0003677; GO:0005634; GO:0006355	DNA binding; nucleus; regulation of transcription, DNA	AT5G60200	TMO6	TARGET OF MONOPTEROS 6	TARGET OF MONOPTEROS 6 TARGET OF MONOPTEROS 6	Potri.005G134200; Potri.010G204800
OG0000039	OG0000039_665	0.0142524	Potra2n4c8808	Bpev01.c0368.g0007.m0001	FUN_032079-T1	PA_chr09_G001556	PS_chr11_G045264	PS_chr08_G035003	GO:0003677; GO:0005634; GO:0006355	DNA binding; nucleus; regulation of transcription, DNA	AT1G28310	NA	NA	Dof-type zinc finger DNA-binding family protein Dof-type zinc finger DNA-binding family protein	Potri.011G055600; Potri.011G054300; Potri.004G046600; Potri.004G046100
OG0000039	OG0000039_666	0.0243858	Potra2n2c4829	Bpev01.c0368.g0007.m0001	FUN_032079-T1	PA_chr09_G001556	PS_chr11_G045264	PS_chr08_G035003	GO:0003677; GO:0005634; GO:0006355	DNA binding; nucleus; regulation of transcription, DNA	AT3G61850	DAG1	dof affecting germination 1	Dof-type zinc finger DNA-binding family protein Dof-type zinc finger DNA-binding family protein	Potri.014G100900; Potri.012G018700; Potri.002G174300; Potri.015G009300
OG0000039	OG0000039_668	2.68535e-07	Potra2n4c8808	Bpev01.c0368.g0007.m0001	FUN_013010-T1	PA_chr09_G003783	PS_chr11_G045264	PS_chr08_G035003	GO:0003677; GO:0005634; GO:0006355	DNA binding; nucleus; regulation of transcription, DNA	AT1G28310	NA	NA	Dof-type zinc finger DNA-binding family protein Dof-type zinc finger DNA-binding family protein	Potri.011G055600; Potri.011G054300; Potri.004G046600; Potri.004G046100
OG0000039	OG0000039_669	2.68535e-07	Potra2n2c4829	Bpev01.c0368.g0007.m0001	FUN_013010-T1	PA_chr09_G003783	PS_chr11_G045264	PS_chr08_G035003	GO:0003677; GO:0005634; GO:0006355	DNA binding; nucleus; regulation of transcription, DNA	AT3G61850	DAG1	dof affecting germination 1	Dof-type zinc finger DNA-binding family protein Dof-type zinc finger DNA-binding family protein	Potri.014G100900; Potri.012G018700; Potri.002G174300; Potri.015G009300
OG0000039	OG0000039_670	0.000182422	Potra2n14c27144	Bpev01.c0368.g0007.m0001	FUN_013010-T1	PA_chr09_G003783	PS_chr11_G045264	PS_chr08_G035003	GO:0003677; GO:0005634; GO:0006355	DNA binding; nucleus; regulation of transcription, DNA	AT3G61850	DAG1	dof affecting germination 1	Dof-type zinc finger DNA-binding family protein Dof-type zinc finger DNA-binding family protein	Potri.014G100900; Potri.012G018700; Potri.002G174300; Potri.015G009300
OG0000039	OG0000039_672	0.0139336	Potra2n3c8126	Bpev01.c0368.g0007.m0001	FUN_013010-T1	PA_chr08_G003418	PS_chr11_G045264	PS_chr08_G035003	GO:0003677; GO:0005634; GO:0006355	DNA binding; nucleus; regulation of transcription, DNA	AT3G21270	ADOF2; DOF2	DOF zinc finger protein 2	DOF zinc finger protein 2 DOF zinc finger protein 2	Potri.003G034200; Potri.011G047500; Potri.004G038800
OG0000039	OG0000039_673	2.68532e-07	Potra2n4c8808	Bpev01.c0368.g0007.m0001	FUN_013010-T1	PA_chr08_G003418	PS_chr11_G045264	PS_chr08_G035003	GO:0003677; GO:0005634; GO:0006355	DNA binding; nucleus; regulation of transcription, DNA	AT1G28310	NA	NA	Dof-type zinc finger DNA-binding family protein Dof-type zinc finger DNA-binding family protein	Potri.011G055600; Potri.011G054300; Potri.004G046600; Potri.004G046100
OG0000039	OG0000039_674	2.78299e-07	Potra2n2c4829	Bpev01.c0368.g0007.m0001	FUN_013010-T1	PA_chr08_G003418	PS_chr11_G045264	PS_chr08_G035003	GO:0003677; GO:0005634; GO:0006355	DNA binding; nucleus; regulation of transcription, DNA	AT3G61850	DAG1	dof affecting germination 1	Dof-type zinc finger DNA-binding family protein Dof-type zinc finger DNA-binding family protein	Potri.014G100900; Potri.012G018700; Potri.002G174300; Potri.015G009300
OG0000039	OG0000039_675	1.0852e-06	Potra2n14c27144	Bpev01.c0368.g0007.m0001	FUN_013010-T1	PA_chr08_G003418	PS_chr11_G045264	PS_chr08_G035003	GO:0003677; GO:0005634; GO:0006355	DNA binding; nucleus; regulation of transcription, DNA	AT3G61850	DAG1	dof affecting germination 1	Dof-type zinc finger DNA-binding family protein Dof-type zinc finger DNA-binding family protein	Potri.014G100900; Potri.012G018700; Potri.002G174300; Potri.015G009300
OG0000039	OG0000039_678	0.0101503	Potra2n4c8808	Bpev01.c0368.g0007.m0001	FUN_013010-T1	PA_chr09_G001556	PS_chr11_G045264	PS_chr08_G035003	GO:0003677; GO:0005634; GO:0006355	DNA binding; nucleus; regulation of transcription, DNA	AT1G28310	NA	NA	Dof-type zinc finger DNA-binding family protein Dof-type zinc finger DNA-binding family protein	Potri.011G055600; Potri.011G054300; Potri.004G046600; Potri.004G046100
OG0000039	OG0000039_679	0.0202836	Potra2n2c4829	Bpev01.c0368.g0007.m0001	FUN_013010-T1	PA_chr09_G001556	PS_chr11_G045264	PS_chr08_G035003	GO:0003677; GO:0005634; GO:0006355	DNA binding; nucleus; regulation of transcription, DNA	AT3G61850	DAG1	dof affecting germination 1	Dof-type zinc finger DNA-binding family protein Dof-type zinc finger DNA-binding family protein	Potri.014G100900; Potri.012G018700; Potri.002G174300; Potri.015G009300
OG0000039	OG0000039_680	0.0136833	Potra2n12c23811	Bpev01.c0368.g0007.m0001	FUN_019322-T1	PA_chr09_G003783	PS_chr08_G035003	PS_chr08_G035003	GO:0003677; GO:0005634; GO:0006355	DNA binding; nucleus; regulation of transcription, DNA	AT3G61850	DAG1	dof affecting germination 1	Dof-type zinc finger DNA-binding family protein Dof-type zinc finger DNA-binding family protein	Potri.014G100900; Potri.012G018700; Potri.002G174300; Potri.015G009300
OG0000039	OG0000039_681	0.00588334	Potra2n4c8808	Bpev01.c0368.g0007.m0001	FUN_019322-T1	PA_chr09_G003783	PS_chr08_G035003	PS_chr08_G035003	GO:0003677; GO:0005634; GO:0006355	DNA binding; nucleus; regulation of transcription, DNA	AT1G28310	NA	NA	Dof-type zinc finger DNA-binding family protein Dof-type zinc finger DNA-binding family protein	Potri.011G055600; Potri.011G054300; Potri.004G046600; Potri.004G046100
OG0000039	OG0000039_682	0.00588334	Potra2n2c4829	Bpev01.c0368.g0007.m0001	FUN_019322-T1	PA_chr09_G003783	PS_chr08_G035003	PS_chr08_G035003	GO:0003677; GO:0005634; GO:0006355	DNA binding; nucleus; regulation of transcription, DNA	AT3G61850	DAG1	dof affecting germination 1	Dof-type zinc finger DNA-binding family protein Dof-type zinc finger DNA-binding family protein	Potri.014G100900; Potri.012G018700; Potri.002G174300; Potri.015G009300
OG0000039	OG0000039_683	0.0060655	Potra2n14c27144	Bpev01.c0368.g0007.m0001	FUN_019322-T1	PA_chr09_G003783	PS_chr08_G035003	PS_chr08_G035003	GO:0003677; GO:0005634; GO:0006355	DNA binding; nucleus; regulation of transcription, DNA	AT3G61850	DAG1	dof affecting germination 1	Dof-type zinc finger DNA-binding family protein Dof-type zinc finger DNA-binding family protein	Potri.014G100900; Potri.012G018700; Potri.002G174300; Potri.015G009300
OG0000039	OG0000039_684	0.00795701	Potra2n203s34938	Bpev01.c0368.g0007.m0001	FUN_019322-T1	PA_chr09_G003783	PS_chr08_G035003	PS_chr08_G035003	GO:0003677; GO:0005634; GO:0006355	DNA binding; nucleus; regulation of transcription, DNA	AT5G60200	TMO6	TARGET OF MONOPTEROS 6	TARGET OF MONOPTEROS 6 TARGET OF MONOPTEROS 6	Potri.005G134200; Potri.010G204800
OG0000039	OG0000039_685	0.00732001	Potra2n3c7191	Bpev01.c0368.g0007.m0001	FUN_019322-T1	PA_chr09_G003783	PS_chr08_G035003	PS_chr08_G035003	GO:0003677; GO:0005634; GO:0006355	DNA binding; nucleus; regulation of transcription, DNA	AT4G24060	NA	NA	Dof-type zinc finger DNA-binding family protein Dof-type zinc finger DNA-binding family protein	Potri.003G144500; Potri.001G086400
OG0000039	OG0000039_686	0.0216667	Potra2n15c28772	Bpev01.c0368.g0007.m0001	FUN_019322-T1	PA_chr09_G003783	PS_chr08_G035003	PS_chr08_G035003	GO:0003677; GO:0005634; GO:0006355	DNA binding; nucleus; regulation of transcription, DNA	AT5G60850	OBP4	OBF binding protein 4	OBF binding protein 4 OBF binding protein 4	Potri.011G054300; Potri.015G048300; Potri.012G063800; Potri.004G046100
OG0000039	OG0000039_687	0.0200333	Potra2n394s35532	Bpev01.c0368.g0007.m0001	FUN_019322-T1	PA_chr09_G003783	PS_chr08_G035003	PS_chr08_G035003	GO:0003677; GO:0005634; GO:0006355	DNA binding; nucleus; regulation of transcription, DNA	AT5G60850	OBP4	OBF binding protein 4	OBF binding protein 4 OBF binding protein 4	Potri.011G054300; Potri.015G048300; Potri.012G063800; Potri.004G046100
OG0000039	OG0000039_688	0.00623668	Potra2n1c710	Bpev01.c0368.g0007.m0001	FUN_019322-T1	PA_chr09_G003783	PS_chr08_G035003	PS_chr08_G035003	GO:0003677; GO:0005634; GO:0006355	DNA binding; nucleus; regulation of transcription, DNA	AT4G24060	NA	NA	Dof-type zinc finger DNA-binding family protein Dof-type zinc finger DNA-binding family protein	Potri.003G144500; Potri.001G086400
OG0000039	OG0000039_689	0.0221667	Potra2n12c23811	Bpev01.c0368.g0007.m0001	FUN_019322-T1	PA_chr08_G003418	PS_chr08_G035003	PS_chr08_G035003	GO:0003677; GO:0005634; GO:0006355	DNA binding; nucleus; regulation of transcription, DNA	AT3G61850	DAG1	dof affecting germination 1	Dof-type zinc finger DNA-binding family protein Dof-type zinc finger DNA-binding family protein	Potri.014G100900; Potri.012G018700; Potri.002G174300; Potri.015G009300
OG0000039	OG0000039_690	0.0198167	Potra2n3c8126	Bpev01.c0368.g0007.m0001	FUN_019322-T1	PA_chr08_G003418	PS_chr08_G035003	PS_chr08_G035003	GO:0003677; GO:0005634; GO:0006355	DNA binding; nucleus; regulation of transcription, DNA	AT3G21270	ADOF2; DOF2	DOF zinc finger protein 2	DOF zinc finger protein 2 DOF zinc finger protein 2	Potri.003G034200; Potri.011G047500; Potri.004G038800
OG0000039	OG0000039_691	0.00588334	Potra2n4c8808	Bpev01.c0368.g0007.m0001	FUN_019322-T1	PA_chr08_G003418	PS_chr08_G035003	PS_chr08_G035003	GO:0003677; GO:0005634; GO:0006355	DNA binding; nucleus; regulation of transcription, DNA	AT1G28310	NA	NA	Dof-type zinc finger DNA-binding family protein Dof-type zinc finger DNA-binding family protein	Potri.011G055600; Potri.011G054300; Potri.004G046600; Potri.004G046100
OG0000039	OG0000039_692	0.00588335	Potra2n2c4829	Bpev01.c0368.g0007.m0001	FUN_019322-T1	PA_chr08_G003418	PS_chr08_G035003	PS_chr08_G035003	GO:0003677; GO:0005634; GO:0006355	DNA binding; nucleus; regulation of transcription, DNA	AT3G61850	DAG1	dof affecting germination 1	Dof-type zinc finger DNA-binding family protein Dof-type zinc finger DNA-binding family protein	Potri.014G100900; Potri.012G018700; Potri.002G174300; Potri.015G009300
OG0000039	OG0000039_693	0.00588416	Potra2n14c27144	Bpev01.c0368.g0007.m0001	FUN_019322-T1	PA_chr08_G003418	PS_chr08_G035003	PS_chr08_G035003	GO:0003677; GO:0005634; GO:0006355	DNA binding; nucleus; regulation of transcription, DNA	AT3G61850	DAG1	dof affecting germination 1	Dof-type zinc finger DNA-binding family protein Dof-type zinc finger DNA-binding family protein	Potri.014G100900; Potri.012G018700; Potri.002G174300; Potri.015G009300
OG0000039	OG0000039_694	0.00831834	Potra2n203s34938	Bpev01.c0368.g0007.m0001	FUN_019322-T1	PA_chr08_G003418	PS_chr08_G035003	PS_chr08_G035003	GO:0003677; GO:0005634; GO:0006355	DNA binding; nucleus; regulation of transcription, DNA	AT5G60200	TMO6	TARGET OF MONOPTEROS 6	TARGET OF MONOPTEROS 6 TARGET OF MONOPTEROS 6	Potri.005G134200; Potri.010G204800
OG0000039	OG0000039_695	0.00623668	Potra2n1c710	Bpev01.c0368.g0007.m0001	FUN_019322-T1	PA_chr08_G003418	PS_chr08_G035003	PS_chr08_G035003	GO:0003677; GO:0005634; GO:0006355	DNA binding; nucleus; regulation of transcription, DNA	AT4G24060	NA	NA	Dof-type zinc finger DNA-binding family protein Dof-type zinc finger DNA-binding family protein	Potri.003G144500; Potri.001G086400
OG0000039	OG0000039_696	0.0216667	Potra2n15c28772	Bpev01.c0368.g0007.m0001	FUN_019322-T1	PA_chr08_G003418	PS_chr08_G035003	PS_chr08_G035003	GO:0003677; GO:0005634; GO:0006355	DNA binding; nucleus; regulation of transcription, DNA	AT5G60850	OBP4	OBF binding protein 4	OBF binding protein 4 OBF binding protein 4	Potri.011G054300; Potri.015G048300; Potri.012G063800; Potri.004G046100
OG0000039	OG0000039_697	0.0200333	Potra2n394s35532	Bpev01.c0368.g0007.m0001	FUN_019322-T1	PA_chr08_G003418	PS_chr08_G035003	PS_chr08_G035003	GO:0003677; GO:0005634; GO:0006355	DNA binding; nucleus; regulation of transcription, DNA	AT5G60850	OBP4	OBF binding protein 4	OBF binding protein 4 OBF binding protein 4	Potri.011G054300; Potri.015G048300; Potri.012G063800; Potri.004G046100
OG0000039	OG0000039_698	0.00714262	Potra2n12c23811	Bpev01.c0368.g0007.m0001	FUN_019322-T1	PA_chr09_G001556	PS_chr08_G035003	PS_chr08_G035003	GO:0003677; GO:0005634; GO:0006355	DNA binding; nucleus; regulation of transcription, DNA	AT3G61850	DAG1	dof affecting germination 1	Dof-type zinc finger DNA-binding family protein Dof-type zinc finger DNA-binding family protein	Potri.014G100900; Potri.012G018700; Potri.002G174300; Potri.015G009300
OG0000039	OG0000039_699	0.0184876	Potra2n3c8126	Bpev01.c0368.g0007.m0001	FUN_019322-T1	PA_chr09_G001556	PS_chr08_G035003	PS_chr08_G035003	GO:0003677; GO:0005634; GO:0006355	DNA binding; nucleus; regulation of transcription, DNA	AT3G21270	ADOF2; DOF2	DOF zinc finger protein 2	DOF zinc finger protein 2 DOF zinc finger protein 2	Potri.003G034200; Potri.011G047500; Potri.004G038800
OG0000039	OG0000039_700	0.00627086	Potra2n4c8808	Bpev01.c0368.g0007.m0001	FUN_019322-T1	PA_chr09_G001556	PS_chr08_G035003	PS_chr08_G035003	GO:0003677; GO:0005634; GO:0006355	DNA binding; nucleus; regulation of transcription, DNA	AT1G28310	NA	NA	Dof-type zinc finger DNA-binding family protein Dof-type zinc finger DNA-binding family protein	Potri.011G055600; Potri.011G054300; Potri.004G046600; Potri.004G046100
OG0000039	OG0000039_701	0.0164042	Potra2n2c4829	Bpev01.c0368.g0007.m0001	FUN_019322-T1	PA_chr09_G001556	PS_chr08_G035003	PS_chr08_G035003	GO:0003677; GO:0005634; GO:0006355	DNA binding; nucleus; regulation of transcription, DNA	AT3G61850	DAG1	dof affecting germination 1	Dof-type zinc finger DNA-binding family protein Dof-type zinc finger DNA-binding family protein	Potri.014G100900; Potri.012G018700; Potri.002G174300; Potri.015G009300
OG0000039	OG0000039_702	0.00657595	Potra2n1c710	Bpev01.c0368.g0007.m0001	FUN_019322-T1	PA_chr09_G001556	PS_chr08_G035003	PS_chr08_G035003	GO:0003677; GO:0005634; GO:0006355	DNA binding; nucleus; regulation of transcription, DNA	AT4G24060	NA	NA	Dof-type zinc finger DNA-binding family protein Dof-type zinc finger DNA-binding family protein	Potri.003G144500; Potri.001G086400
OG0000039	OG0000039_703	0.0205042	Potra2n15c28772	Bpev01.c0368.g0007.m0001	FUN_019322-T1	PA_chr09_G001556	PS_chr08_G035003	PS_chr08_G035003	GO:0003677; GO:0005634; GO:0006355	DNA binding; nucleus; regulation of transcription, DNA	AT5G60850	OBP4	OBF binding protein 4	OBF binding protein 4 OBF binding protein 4	Potri.011G054300; Potri.015G048300; Potri.012G063800; Potri.004G046100
OG0000039	OG0000039_704	0.00588762	Potra2n3c7191	Bpev01.c0368.g0007.m0001	FUN_019322-T1	PA_chr09_G001556	PS_chr08_G035003	PS_chr08_G035003	GO:0003677; GO:0005634; GO:0006355	DNA binding; nucleus; regulation of transcription, DNA	AT4G24060	NA	NA	Dof-type zinc finger DNA-binding family protein Dof-type zinc finger DNA-binding family protein	Potri.003G144500; Potri.001G086400
OG0000039	OG0000039_705	0.0200543	Potra2n394s35532	Bpev01.c0368.g0007.m0001	FUN_019322-T1	PA_chr09_G001556	PS_chr08_G035003	PS_chr08_G035003	GO:0003677; GO:0005634; GO:0006355	DNA binding; nucleus; regulation of transcription, DNA	AT5G60850	OBP4	OBF binding protein 4	OBF binding protein 4 OBF binding protein 4	Potri.011G054300; Potri.015G048300; Potri.012G063800; Potri.004G046100
OG0000039	OG0000039_707	0.0099848	Potra2n4c8808	Bpev01.c0368.g0007.m0001	FUN_032079-T1	PA_chr09_G003783	PS_chr08_G035003	PS_chr08_G035003	GO:0003677; GO:0005634; GO:0006355	DNA binding; nucleus; regulation of transcription, DNA	AT1G28310	NA	NA	Dof-type zinc finger DNA-binding family protein Dof-type zinc finger DNA-binding family protein	Potri.011G055600; Potri.011G054300; Potri.004G046600; Potri.004G046100
OG0000039	OG0000039_708	0.0099848	Potra2n2c4829	Bpev01.c0368.g0007.m0001	FUN_032079-T1	PA_chr09_G003783	PS_chr08_G035003	PS_chr08_G035003	GO:0003677; GO:0005634; GO:0006355	DNA binding; nucleus; regulation of transcription, DNA	AT3G61850	DAG1	dof affecting germination 1	Dof-type zinc finger DNA-binding family protein Dof-type zinc finger DNA-binding family protein	Potri.014G100900; Potri.012G018700; Potri.002G174300; Potri.015G009300
OG0000039	OG0000039_709	0.0101669	Potra2n14c27144	Bpev01.c0368.g0007.m0001	FUN_032079-T1	PA_chr09_G003783	PS_chr08_G035003	PS_chr08_G035003	GO:0003677; GO:0005634; GO:0006355	DNA binding; nucleus; regulation of transcription, DNA	AT3G61850	DAG1	dof affecting germination 1	Dof-type zinc finger DNA-binding family protein Dof-type zinc finger DNA-binding family protein	Potri.014G100900; Potri.012G018700; Potri.002G174300; Potri.015G009300
OG0000039	OG0000039_710	0.0120585	Potra2n203s34938	Bpev01.c0368.g0007.m0001	FUN_032079-T1	PA_chr09_G003783	PS_chr08_G035003	PS_chr08_G035003	GO:0003677; GO:0005634; GO:0006355	DNA binding; nucleus; regulation of transcription, DNA	AT5G60200	TMO6	TARGET OF MONOPTEROS 6	TARGET OF MONOPTEROS 6 TARGET OF MONOPTEROS 6	Potri.005G134200; Potri.010G204800
OG0000039	OG0000039_712	0.0192948	Potra2n15c28772	Bpev01.c0368.g0007.m0001	FUN_032079-T1	PA_chr09_G003783	PS_chr08_G035003	PS_chr08_G035003	GO:0003677; GO:0005634; GO:0006355	DNA binding; nucleus; regulation of transcription, DNA	AT5G60850	OBP4	OBF binding protein 4	OBF binding protein 4 OBF binding protein 4	Potri.011G054300; Potri.015G048300; Potri.012G063800; Potri.004G046100
OG0000039	OG0000039_716	0.0239181	Potra2n3c8126	Bpev01.c0368.g0007.m0001	FUN_032079-T1	PA_chr08_G003418	PS_chr08_G035003	PS_chr08_G035003	GO:0003677; GO:0005634; GO:0006355	DNA binding; nucleus; regulation of transcription, DNA	AT3G21270	ADOF2; DOF2	DOF zinc finger protein 2	DOF zinc finger protein 2 DOF zinc finger protein 2	Potri.003G034200; Potri.011G047500; Potri.004G038800
OG0000039	OG0000039_717	0.0099848	Potra2n4c8808	Bpev01.c0368.g0007.m0001	FUN_032079-T1	PA_chr08_G003418	PS_chr08_G035003	PS_chr08_G035003	GO:0003677; GO:0005634; GO:0006355	DNA binding; nucleus; regulation of transcription, DNA	AT1G28310	NA	NA	Dof-type zinc finger DNA-binding family protein Dof-type zinc finger DNA-binding family protein	Potri.011G055600; Potri.011G054300; Potri.004G046600; Potri.004G046100
OG0000039	OG0000039_718	0.00998481	Potra2n2c4829	Bpev01.c0368.g0007.m0001	FUN_032079-T1	PA_chr08_G003418	PS_chr08_G035003	PS_chr08_G035003	GO:0003677; GO:0005634; GO:0006355	DNA binding; nucleus; regulation of transcription, DNA	AT3G61850	DAG1	dof affecting germination 1	Dof-type zinc finger DNA-binding family protein Dof-type zinc finger DNA-binding family protein	Potri.014G100900; Potri.012G018700; Potri.002G174300; Potri.015G009300
OG0000039	OG0000039_719	0.00998561	Potra2n14c27144	Bpev01.c0368.g0007.m0001	FUN_032079-T1	PA_chr08_G003418	PS_chr08_G035003	PS_chr08_G035003	GO:0003677; GO:0005634; GO:0006355	DNA binding; nucleus; regulation of transcription, DNA	AT3G61850	DAG1	dof affecting germination 1	Dof-type zinc finger DNA-binding family protein Dof-type zinc finger DNA-binding family protein	Potri.014G100900; Potri.012G018700; Potri.002G174300; Potri.015G009300
OG0000039	OG0000039_720	0.0124198	Potra2n203s34938	Bpev01.c0368.g0007.m0001	FUN_032079-T1	PA_chr08_G003418	PS_chr08_G035003	PS_chr08_G035003	GO:0003677; GO:0005634; GO:0006355	DNA binding; nucleus; regulation of transcription, DNA	AT5G60200	TMO6	TARGET OF MONOPTEROS 6	TARGET OF MONOPTEROS 6 TARGET OF MONOPTEROS 6	Potri.005G134200; Potri.010G204800
OG0000039	OG0000039_722	0.0192948	Potra2n15c28772	Bpev01.c0368.g0007.m0001	FUN_032079-T1	PA_chr08_G003418	PS_chr08_G035003	PS_chr08_G035003	GO:0003677; GO:0005634; GO:0006355	DNA binding; nucleus; regulation of transcription, DNA	AT5G60850	OBP4	OBF binding protein 4	OBF binding protein 4 OBF binding protein 4	Potri.011G054300; Potri.015G048300; Potri.012G063800; Potri.004G046100
OG0000039	OG0000039_725	0.0225891	Potra2n3c8126	Bpev01.c0368.g0007.m0001	FUN_032079-T1	PA_chr09_G001556	PS_chr08_G035003	PS_chr08_G035003	GO:0003677; GO:0005634; GO:0006355	DNA binding; nucleus; regulation of transcription, DNA	AT3G21270	ADOF2; DOF2	DOF zinc finger protein 2	DOF zinc finger protein 2 DOF zinc finger protein 2	Potri.003G034200; Potri.011G047500; Potri.004G038800
OG0000039	OG0000039_726	0.0103723	Potra2n4c8808	Bpev01.c0368.g0007.m0001	FUN_032079-T1	PA_chr09_G001556	PS_chr08_G035003	PS_chr08_G035003	GO:0003677; GO:0005634; GO:0006355	DNA binding; nucleus; regulation of transcription, DNA	AT1G28310	NA	NA	Dof-type zinc finger DNA-binding family protein Dof-type zinc finger DNA-binding family protein	Potri.011G055600; Potri.011G054300; Potri.004G046600; Potri.004G046100
OG0000039	OG0000039_727	0.0205056	Potra2n2c4829	Bpev01.c0368.g0007.m0001	FUN_032079-T1	PA_chr09_G001556	PS_chr08_G035003	PS_chr08_G035003	GO:0003677; GO:0005634; GO:0006355	DNA binding; nucleus; regulation of transcription, DNA	AT3G61850	DAG1	dof affecting germination 1	Dof-type zinc finger DNA-binding family protein Dof-type zinc finger DNA-binding family protein	Potri.014G100900; Potri.012G018700; Potri.002G174300; Potri.015G009300
OG0000039	OG0000039_728	0.0106774	Potra2n1c710	Bpev01.c0368.g0007.m0001	FUN_032079-T1	PA_chr09_G001556	PS_chr08_G035003	PS_chr08_G035003	GO:0003677; GO:0005634; GO:0006355	DNA binding; nucleus; regulation of transcription, DNA	AT4G24060	NA	NA	Dof-type zinc finger DNA-binding family protein Dof-type zinc finger DNA-binding family protein	Potri.003G144500; Potri.001G086400
OG0000039	OG0000039_729	0.0246056	Potra2n15c28772	Bpev01.c0368.g0007.m0001	FUN_032079-T1	PA_chr09_G001556	PS_chr08_G035003	PS_chr08_G035003	GO:0003677; GO:0005634; GO:0006355	DNA binding; nucleus; regulation of transcription, DNA	AT5G60850	OBP4	OBF binding protein 4	OBF binding protein 4 OBF binding protein 4	Potri.011G054300; Potri.015G048300; Potri.012G063800; Potri.004G046100
OG0000039	OG0000039_733	0.00588333	Potra2n4c8808	Bpev01.c0368.g0007.m0001	FUN_013010-T1	PA_chr09_G003783	PS_chr08_G035003	PS_chr08_G035003	GO:0003677; GO:0005634; GO:0006355	DNA binding; nucleus; regulation of transcription, DNA	AT1G28310	NA	NA	Dof-type zinc finger DNA-binding family protein Dof-type zinc finger DNA-binding family protein	Potri.011G055600; Potri.011G054300; Potri.004G046600; Potri.004G046100
OG0000039	OG0000039_734	0.00588333	Potra2n2c4829	Bpev01.c0368.g0007.m0001	FUN_013010-T1	PA_chr09_G003783	PS_chr08_G035003	PS_chr08_G035003	GO:0003677; GO:0005634; GO:0006355	DNA binding; nucleus; regulation of transcription, DNA	AT3G61850	DAG1	dof affecting germination 1	Dof-type zinc finger DNA-binding family protein Dof-type zinc finger DNA-binding family protein	Potri.014G100900; Potri.012G018700; Potri.002G174300; Potri.015G009300
OG0000039	OG0000039_735	0.00606549	Potra2n14c27144	Bpev01.c0368.g0007.m0001	FUN_013010-T1	PA_chr09_G003783	PS_chr08_G035003	PS_chr08_G035003	GO:0003677; GO:0005634; GO:0006355	DNA binding; nucleus; regulation of transcription, DNA	AT3G61850	DAG1	dof affecting germination 1	Dof-type zinc finger DNA-binding family protein Dof-type zinc finger DNA-binding family protein	Potri.014G100900; Potri.012G018700; Potri.002G174300; Potri.015G009300
OG0000039	OG0000039_738	0.00623667	Potra2n1c710	Bpev01.c0368.g0007.m0001	FUN_013010-T1	PA_chr09_G003783	PS_chr08_G035003	PS_chr08_G035003	GO:0003677; GO:0005634; GO:0006355	DNA binding; nucleus; regulation of transcription, DNA	AT4G24060	NA	NA	Dof-type zinc finger DNA-binding family protein Dof-type zinc finger DNA-binding family protein	Potri.003G144500; Potri.001G086400
OG0000039	OG0000039_740	0.0198167	Potra2n3c8126	Bpev01.c0368.g0007.m0001	FUN_013010-T1	PA_chr08_G003418	PS_chr08_G035003	PS_chr08_G035003	GO:0003677; GO:0005634; GO:0006355	DNA binding; nucleus; regulation of transcription, DNA	AT3G21270	ADOF2; DOF2	DOF zinc finger protein 2	DOF zinc finger protein 2 DOF zinc finger protein 2	Potri.003G034200; Potri.011G047500; Potri.004G038800
OG0000039	OG0000039_741	0.00588333	Potra2n4c8808	Bpev01.c0368.g0007.m0001	FUN_013010-T1	PA_chr08_G003418	PS_chr08_G035003	PS_chr08_G035003	GO:0003677; GO:0005634; GO:0006355	DNA binding; nucleus; regulation of transcription, DNA	AT1G28310	NA	NA	Dof-type zinc finger DNA-binding family protein Dof-type zinc finger DNA-binding family protein	Potri.011G055600; Potri.011G054300; Potri.004G046600; Potri.004G046100
OG0000039	OG0000039_742	0.00588334	Potra2n2c4829	Bpev01.c0368.g0007.m0001	FUN_013010-T1	PA_chr08_G003418	PS_chr08_G035003	PS_chr08_G035003	GO:0003677; GO:0005634; GO:0006355	DNA binding; nucleus; regulation of transcription, DNA	AT3G61850	DAG1	dof affecting germination 1	Dof-type zinc finger DNA-binding family protein Dof-type zinc finger DNA-binding family protein	Potri.014G100900; Potri.012G018700; Potri.002G174300; Potri.015G009300
OG0000039	OG0000039_743	0.00588415	Potra2n14c27144	Bpev01.c0368.g0007.m0001	FUN_013010-T1	PA_chr08_G003418	PS_chr08_G035003	PS_chr08_G035003	GO:0003677; GO:0005634; GO:0006355	DNA binding; nucleus; regulation of transcription, DNA	AT3G61850	DAG1	dof affecting germination 1	Dof-type zinc finger DNA-binding family protein Dof-type zinc finger DNA-binding family protein	Potri.014G100900; Potri.012G018700; Potri.002G174300; Potri.015G009300
OG0000039	OG0000039_744	0.00623667	Potra2n1c710	Bpev01.c0368.g0007.m0001	FUN_013010-T1	PA_chr08_G003418	PS_chr08_G035003	PS_chr08_G035003	GO:0003677; GO:0005634; GO:0006355	DNA binding; nucleus; regulation of transcription, DNA	AT4G24060	NA	NA	Dof-type zinc finger DNA-binding family protein Dof-type zinc finger DNA-binding family protein	Potri.003G144500; Potri.001G086400
OG0000039	OG0000039_747	0.00714261	Potra2n12c23811	Bpev01.c0368.g0007.m0001	FUN_013010-T1	PA_chr09_G001556	PS_chr08_G035003	PS_chr08_G035003	GO:0003677; GO:0005634; GO:0006355	DNA binding; nucleus; regulation of transcription, DNA	AT3G61850	DAG1	dof affecting germination 1	Dof-type zinc finger DNA-binding family protein Dof-type zinc finger DNA-binding family protein	Potri.014G100900; Potri.012G018700; Potri.002G174300; Potri.015G009300
OG0000039	OG0000039_748	0.0184876	Potra2n3c8126	Bpev01.c0368.g0007.m0001	FUN_013010-T1	PA_chr09_G001556	PS_chr08_G035003	PS_chr08_G035003	GO:0003677; GO:0005634; GO:0006355	DNA binding; nucleus; regulation of transcription, DNA	AT3G21270	ADOF2; DOF2	DOF zinc finger protein 2	DOF zinc finger protein 2 DOF zinc finger protein 2	Potri.003G034200; Potri.011G047500; Potri.004G038800
OG0000039	OG0000039_749	0.00627085	Potra2n4c8808	Bpev01.c0368.g0007.m0001	FUN_013010-T1	PA_chr09_G001556	PS_chr08_G035003	PS_chr08_G035003	GO:0003677; GO:0005634; GO:0006355	DNA binding; nucleus; regulation of transcription, DNA	AT1G28310	NA	NA	Dof-type zinc finger DNA-binding family protein Dof-type zinc finger DNA-binding family protein	Potri.011G055600; Potri.011G054300; Potri.004G046600; Potri.004G046100
OG0000039	OG0000039_750	0.0164042	Potra2n2c4829	Bpev01.c0368.g0007.m0001	FUN_013010-T1	PA_chr09_G001556	PS_chr08_G035003	PS_chr08_G035003	GO:0003677; GO:0005634; GO:0006355	DNA binding; nucleus; regulation of transcription, DNA	AT3G61850	DAG1	dof affecting germination 1	Dof-type zinc finger DNA-binding family protein Dof-type zinc finger DNA-binding family protein	Potri.014G100900; Potri.012G018700; Potri.002G174300; Potri.015G009300
OG0000039	OG0000039_751	0.00657594	Potra2n1c710	Bpev01.c0368.g0007.m0001	FUN_013010-T1	PA_chr09_G001556	PS_chr08_G035003	PS_chr08_G035003	GO:0003677; GO:0005634; GO:0006355	DNA binding; nucleus; regulation of transcription, DNA	AT4G24060	NA	NA	Dof-type zinc finger DNA-binding family protein Dof-type zinc finger DNA-binding family protein	Potri.003G144500; Potri.001G086400
OG0000039	OG0000039_752	0.0205042	Potra2n15c28772	Bpev01.c0368.g0007.m0001	FUN_013010-T1	PA_chr09_G001556	PS_chr08_G035003	PS_chr08_G035003	GO:0003677; GO:0005634; GO:0006355	DNA binding; nucleus; regulation of transcription, DNA	AT5G60850	OBP4	OBF binding protein 4	OBF binding protein 4 OBF binding protein 4	Potri.011G054300; Potri.015G048300; Potri.012G063800; Potri.004G046100
OG0000039	OG0000039_753	0.0200543	Potra2n394s35532	Bpev01.c0368.g0007.m0001	FUN_013010-T1	PA_chr09_G001556	PS_chr08_G035003	PS_chr08_G035003	GO:0003677; GO:0005634; GO:0006355	DNA binding; nucleus; regulation of transcription, DNA	AT5G60850	OBP4	OBF binding protein 4	OBF binding protein 4 OBF binding protein 4	Potri.011G054300; Potri.015G048300; Potri.012G063800; Potri.004G046100
OG0000039	OG0000039_755	0.0104833	Potra2n2c4829	Bpev01.c0368.g0007.m0001	FUN_026351-T1	PA_chr09_G003783	PS_chr08_G035003	PS_chr08_G035003	GO:0003677; GO:0005634; GO:0006355	DNA binding; nucleus; regulation of transcription, DNA	AT3G61850	DAG1	dof affecting germination 1	Dof-type zinc finger DNA-binding family protein Dof-type zinc finger DNA-binding family protein	Potri.014G100900; Potri.012G018700; Potri.002G174300; Potri.015G009300
OG0000039	OG0000039_756	0.01885	Potra2n15c28772	Bpev01.c0368.g0007.m0001	FUN_026351-T1	PA_chr09_G003783	PS_chr08_G035003	PS_chr08_G035003	GO:0003677; GO:0005634; GO:0006355	DNA binding; nucleus; regulation of transcription, DNA	AT5G60850	OBP4	OBF binding protein 4	OBF binding protein 4 OBF binding protein 4	Potri.011G054300; Potri.015G048300; Potri.012G063800; Potri.004G046100
OG0000039	OG0000039_758	0.0108367	Potra2n1c710	Bpev01.c0368.g0007.m0001	FUN_026351-T1	PA_chr09_G003783	PS_chr08_G035003	PS_chr08_G035003	GO:0003677; GO:0005634; GO:0006355	DNA binding; nucleus; regulation of transcription, DNA	AT4G24060	NA	NA	Dof-type zinc finger DNA-binding family protein Dof-type zinc finger DNA-binding family protein	Potri.003G144500; Potri.001G086400
OG0000039	OG0000039_761	0.0244167	Potra2n3c8126	Bpev01.c0368.g0007.m0001	FUN_026351-T1	PA_chr08_G003418	PS_chr08_G035003	PS_chr08_G035003	GO:0003677; GO:0005634; GO:0006355	DNA binding; nucleus; regulation of transcription, DNA	AT3G21270	ADOF2; DOF2	DOF zinc finger protein 2	DOF zinc finger protein 2 DOF zinc finger protein 2	Potri.003G034200; Potri.011G047500; Potri.004G038800
OG0000039	OG0000039_762	0.0104833	Potra2n2c4829	Bpev01.c0368.g0007.m0001	FUN_026351-T1	PA_chr08_G003418	PS_chr08_G035003	PS_chr08_G035003	GO:0003677; GO:0005634; GO:0006355	DNA binding; nucleus; regulation of transcription, DNA	AT3G61850	DAG1	dof affecting germination 1	Dof-type zinc finger DNA-binding family protein Dof-type zinc finger DNA-binding family protein	Potri.014G100900; Potri.012G018700; Potri.002G174300; Potri.015G009300
OG0000039	OG0000039_766	0.0117426	Potra2n12c23811	Bpev01.c0368.g0007.m0001	FUN_026351-T1	PA_chr09_G001556	PS_chr08_G035003	PS_chr08_G035003	GO:0003677; GO:0005634; GO:0006355	DNA binding; nucleus; regulation of transcription, DNA	AT3G61850	DAG1	dof affecting germination 1	Dof-type zinc finger DNA-binding family protein Dof-type zinc finger DNA-binding family protein	Potri.014G100900; Potri.012G018700; Potri.002G174300; Potri.015G009300
OG0000039	OG0000039_767	0.0230876	Potra2n3c8126	Bpev01.c0368.g0007.m0001	FUN_026351-T1	PA_chr09_G001556	PS_chr08_G035003	PS_chr08_G035003	GO:0003677; GO:0005634; GO:0006355	DNA binding; nucleus; regulation of transcription, DNA	AT3G21270	ADOF2; DOF2	DOF zinc finger protein 2	DOF zinc finger protein 2 DOF zinc finger protein 2	Potri.003G034200; Potri.011G047500; Potri.004G038800
OG0000039	OG0000039_768	0.0210042	Potra2n2c4829	Bpev01.c0368.g0007.m0001	FUN_026351-T1	PA_chr09_G001556	PS_chr08_G035003	PS_chr08_G035003	GO:0003677; GO:0005634; GO:0006355	DNA binding; nucleus; regulation of transcription, DNA	AT3G61850	DAG1	dof affecting germination 1	Dof-type zinc finger DNA-binding family protein Dof-type zinc finger DNA-binding family protein	Potri.014G100900; Potri.012G018700; Potri.002G174300; Potri.015G009300
OG0000039	OG0000039_769	0.0111759	Potra2n1c710	Bpev01.c0368.g0007.m0001	FUN_026351-T1	PA_chr09_G001556	PS_chr08_G035003	PS_chr08_G035003	GO:0003677; GO:0005634; GO:0006355	DNA binding; nucleus; regulation of transcription, DNA	AT4G24060	NA	NA	Dof-type zinc finger DNA-binding family protein Dof-type zinc finger DNA-binding family protein	Potri.003G144500; Potri.001G086400
OG0000039	OG0000039_770	0.0251042	Potra2n15c28772	Bpev01.c0368.g0007.m0001	FUN_026351-T1	PA_chr09_G001556	PS_chr08_G035003	PS_chr08_G035003	GO:0003677; GO:0005634; GO:0006355	DNA binding; nucleus; regulation of transcription, DNA	AT5G60850	OBP4	OBF binding protein 4	OBF binding protein 4 OBF binding protein 4	Potri.011G054300; Potri.015G048300; Potri.012G063800; Potri.004G046100
OG0000039	OG0000039_771	0.0246543	Potra2n394s35532	Bpev01.c0368.g0007.m0001	FUN_026351-T1	PA_chr09_G001556	PS_chr08_G035003	PS_chr08_G035003	GO:0003677; GO:0005634; GO:0006355	DNA binding; nucleus; regulation of transcription, DNA	AT5G60850	OBP4	OBF binding protein 4	OBF binding protein 4 OBF binding protein 4	Potri.011G054300; Potri.015G048300; Potri.012G063800; Potri.004G046100
OG0000039	OG0000039_772	0.0104876	Potra2n3c7191	Bpev01.c0368.g0007.m0001	FUN_026351-T1	PA_chr09_G001556	PS_chr08_G035003	PS_chr08_G035003	GO:0003677; GO:0005634; GO:0006355	DNA binding; nucleus; regulation of transcription, DNA	AT4G24060	NA	NA	Dof-type zinc finger DNA-binding family protein Dof-type zinc finger DNA-binding family protein	Potri.003G144500; Potri.001G086400
OG0000039	OG0000039_831	1.00281e-05	Potra2n4c8808	Bpev01.c0368.g0007.m0001	FUN_019322-T1	PA_chr09_G003783	PS_chr11_G045264	PS_chr09_G038070	GO:0003677; GO:0005634; GO:0006355	DNA binding; nucleus; regulation of transcription, DNA	AT1G28310	NA	NA	Dof-type zinc finger DNA-binding family protein Dof-type zinc finger DNA-binding family protein	Potri.011G055600; Potri.011G054300; Potri.004G046600; Potri.004G046100
OG0000039	OG0000039_832	5.63053e-07	Potra2n2c4829	Bpev01.c0368.g0007.m0001	FUN_019322-T1	PA_chr09_G003783	PS_chr11_G045264	PS_chr09_G038070	GO:0003677; GO:0005634; GO:0006355	DNA binding; nucleus; regulation of transcription, DNA	AT3G61850	DAG1	dof affecting germination 1	Dof-type zinc finger DNA-binding family protein Dof-type zinc finger DNA-binding family protein	Potri.014G100900; Potri.012G018700; Potri.002G174300; Potri.015G009300
OG0000039	OG0000039_833	0.000583811	Potra2n14c27144	Bpev01.c0368.g0007.m0001	FUN_019322-T1	PA_chr09_G003783	PS_chr11_G045264	PS_chr09_G038070	GO:0003677; GO:0005634; GO:0006355	DNA binding; nucleus; regulation of transcription, DNA	AT3G61850	DAG1	dof affecting germination 1	Dof-type zinc finger DNA-binding family protein Dof-type zinc finger DNA-binding family protein	Potri.014G100900; Potri.012G018700; Potri.002G174300; Potri.015G009300
OG0000039	OG0000039_834	0.00422414	Potra2n203s34938	Bpev01.c0368.g0007.m0001	FUN_019322-T1	PA_chr09_G003783	PS_chr11_G045264	PS_chr09_G038070	GO:0003677; GO:0005634; GO:0006355	DNA binding; nucleus; regulation of transcription, DNA	AT5G60200	TMO6	TARGET OF MONOPTEROS 6	TARGET OF MONOPTEROS 6 TARGET OF MONOPTEROS 6	Potri.005G134200; Potri.010G204800
OG0000039	OG0000039_836	0.0155088	Potra2n3c8126	Bpev01.c0368.g0007.m0001	FUN_019322-T1	PA_chr08_G003418	PS_chr11_G045264	PS_chr09_G038070	GO:0003677; GO:0005634; GO:0006355	DNA binding; nucleus; regulation of transcription, DNA	AT3G21270	ADOF2; DOF2	DOF zinc finger protein 2	DOF zinc finger protein 2 DOF zinc finger protein 2	Potri.003G034200; Potri.011G047500; Potri.004G038800
OG0000039	OG0000039_837	1.00281e-05	Potra2n4c8808	Bpev01.c0368.g0007.m0001	FUN_019322-T1	PA_chr08_G003418	PS_chr11_G045264	PS_chr09_G038070	GO:0003677; GO:0005634; GO:0006355	DNA binding; nucleus; regulation of transcription, DNA	AT1G28310	NA	NA	Dof-type zinc finger DNA-binding family protein Dof-type zinc finger DNA-binding family protein	Potri.011G055600; Potri.011G054300; Potri.004G046600; Potri.004G046100
OG0000039	OG0000039_838	0.000402475	Potra2n14c27144	Bpev01.c0368.g0007.m0001	FUN_019322-T1	PA_chr08_G003418	PS_chr11_G045264	PS_chr09_G038070	GO:0003677; GO:0005634; GO:0006355	DNA binding; nucleus; regulation of transcription, DNA	AT3G61850	DAG1	dof affecting germination 1	Dof-type zinc finger DNA-binding family protein Dof-type zinc finger DNA-binding family protein	Potri.014G100900; Potri.012G018700; Potri.002G174300; Potri.015G009300
OG0000039	OG0000039_839	5.72817e-07	Potra2n2c4829	Bpev01.c0368.g0007.m0001	FUN_019322-T1	PA_chr08_G003418	PS_chr11_G045264	PS_chr09_G038070	GO:0003677; GO:0005634; GO:0006355	DNA binding; nucleus; regulation of transcription, DNA	AT3G61850	DAG1	dof affecting germination 1	Dof-type zinc finger DNA-binding family protein Dof-type zinc finger DNA-binding family protein	Potri.014G100900; Potri.012G018700; Potri.002G174300; Potri.015G009300
OG0000039	OG0000039_840	0.00458548	Potra2n203s34938	Bpev01.c0368.g0007.m0001	FUN_019322-T1	PA_chr08_G003418	PS_chr11_G045264	PS_chr09_G038070	GO:0003677; GO:0005634; GO:0006355	DNA binding; nucleus; regulation of transcription, DNA	AT5G60200	TMO6	TARGET OF MONOPTEROS 6	TARGET OF MONOPTEROS 6 TARGET OF MONOPTEROS 6	Potri.005G134200; Potri.010G204800
OG0000039	OG0000039_842	0.0117205	Potra2n3c8126	Bpev01.c0368.g0007.m0001	FUN_019322-T1	PA_chr09_G001556	PS_chr11_G045264	PS_chr09_G038070	GO:0003677; GO:0005634; GO:0006355	DNA binding; nucleus; regulation of transcription, DNA	AT3G21270	ADOF2; DOF2	DOF zinc finger protein 2	DOF zinc finger protein 2 DOF zinc finger protein 2	Potri.003G034200; Potri.011G047500; Potri.004G038800
OG0000039	OG0000039_843	0.01016	Potra2n4c8808	Bpev01.c0368.g0007.m0001	FUN_019322-T1	PA_chr09_G001556	PS_chr11_G045264	PS_chr09_G038070	GO:0003677; GO:0005634; GO:0006355	DNA binding; nucleus; regulation of transcription, DNA	AT1G28310	NA	NA	Dof-type zinc finger DNA-binding family protein Dof-type zinc finger DNA-binding family protein	Potri.011G055600; Potri.011G054300; Potri.004G046600; Potri.004G046100
OG0000039	OG0000039_844	0.0202839	Potra2n2c4829	Bpev01.c0368.g0007.m0001	FUN_019322-T1	PA_chr09_G001556	PS_chr11_G045264	PS_chr09_G038070	GO:0003677; GO:0005634; GO:0006355	DNA binding; nucleus; regulation of transcription, DNA	AT3G61850	DAG1	dof affecting germination 1	Dof-type zinc finger DNA-binding family protein Dof-type zinc finger DNA-binding family protein	Potri.014G100900; Potri.012G018700; Potri.002G174300; Potri.015G009300
OG0000039	OG0000039_846	0.0149898	Potra2n4c8808	Bpev01.c0368.g0007.m0001	FUN_032079-T1	PA_chr09_G003783	PS_chr11_G045264	PS_chr09_G038070	GO:0003677; GO:0005634; GO:0006355	DNA binding; nucleus; regulation of transcription, DNA	AT1G28310	NA	NA	Dof-type zinc finger DNA-binding family protein Dof-type zinc finger DNA-binding family protein	Potri.011G055600; Potri.011G054300; Potri.004G046600; Potri.004G046100
OG0000039	OG0000039_847	0.0149804	Potra2n2c4829	Bpev01.c0368.g0007.m0001	FUN_032079-T1	PA_chr09_G003783	PS_chr11_G045264	PS_chr09_G038070	GO:0003677; GO:0005634; GO:0006355	DNA binding; nucleus; regulation of transcription, DNA	AT3G61850	DAG1	dof affecting germination 1	Dof-type zinc finger DNA-binding family protein Dof-type zinc finger DNA-binding family protein	Potri.014G100900; Potri.012G018700; Potri.002G174300; Potri.015G009300
OG0000039	OG0000039_848	0.0155636	Potra2n14c27144	Bpev01.c0368.g0007.m0001	FUN_032079-T1	PA_chr09_G003783	PS_chr11_G045264	PS_chr09_G038070	GO:0003677; GO:0005634; GO:0006355	DNA binding; nucleus; regulation of transcription, DNA	AT3G61850	DAG1	dof affecting germination 1	Dof-type zinc finger DNA-binding family protein Dof-type zinc finger DNA-binding family protein	Potri.014G100900; Potri.012G018700; Potri.002G174300; Potri.015G009300
OG0000039	OG0000039_849	0.0192039	Potra2n203s34938	Bpev01.c0368.g0007.m0001	FUN_032079-T1	PA_chr09_G003783	PS_chr11_G045264	PS_chr09_G038070	GO:0003677; GO:0005634; GO:0006355	DNA binding; nucleus; regulation of transcription, DNA	AT5G60200	TMO6	TARGET OF MONOPTEROS 6	TARGET OF MONOPTEROS 6 TARGET OF MONOPTEROS 6	Potri.005G134200; Potri.010G204800
OG0000039	OG0000039_851	0.0304886	Potra2n3c8126	Bpev01.c0368.g0007.m0001	FUN_032079-T1	PA_chr08_G003418	PS_chr11_G045264	PS_chr09_G038070	GO:0003677; GO:0005634; GO:0006355	DNA binding; nucleus; regulation of transcription, DNA	AT3G21270	ADOF2; DOF2	DOF zinc finger protein 2	DOF zinc finger protein 2 DOF zinc finger protein 2	Potri.003G034200; Potri.011G047500; Potri.004G038800
OG0000039	OG0000039_852	0.0149898	Potra2n4c8808	Bpev01.c0368.g0007.m0001	FUN_032079-T1	PA_chr08_G003418	PS_chr11_G045264	PS_chr09_G038070	GO:0003677; GO:0005634; GO:0006355	DNA binding; nucleus; regulation of transcription, DNA	AT1G28310	NA	NA	Dof-type zinc finger DNA-binding family protein Dof-type zinc finger DNA-binding family protein	Potri.011G055600; Potri.011G054300; Potri.004G046600; Potri.004G046100
OG0000039	OG0000039_853	0.0153823	Potra2n14c27144	Bpev01.c0368.g0007.m0001	FUN_032079-T1	PA_chr08_G003418	PS_chr11_G045264	PS_chr09_G038070	GO:0003677; GO:0005634; GO:0006355	DNA binding; nucleus; regulation of transcription, DNA	AT3G61850	DAG1	dof affecting germination 1	Dof-type zinc finger DNA-binding family protein Dof-type zinc finger DNA-binding family protein	Potri.014G100900; Potri.012G018700; Potri.002G174300; Potri.015G009300
OG0000039	OG0000039_854	0.0149804	Potra2n2c4829	Bpev01.c0368.g0007.m0001	FUN_032079-T1	PA_chr08_G003418	PS_chr11_G045264	PS_chr09_G038070	GO:0003677; GO:0005634; GO:0006355	DNA binding; nucleus; regulation of transcription, DNA	AT3G61850	DAG1	dof affecting germination 1	Dof-type zinc finger DNA-binding family protein Dof-type zinc finger DNA-binding family protein	Potri.014G100900; Potri.012G018700; Potri.002G174300; Potri.015G009300
OG0000039	OG0000039_855	0.0195653	Potra2n203s34938	Bpev01.c0368.g0007.m0001	FUN_032079-T1	PA_chr08_G003418	PS_chr11_G045264	PS_chr09_G038070	GO:0003677; GO:0005634; GO:0006355	DNA binding; nucleus; regulation of transcription, DNA	AT5G60200	TMO6	TARGET OF MONOPTEROS 6	TARGET OF MONOPTEROS 6 TARGET OF MONOPTEROS 6	Potri.005G134200; Potri.010G204800
OG0000039	OG0000039_862	7.53533e-05	Potra2n2c4829	Bpev01.c0368.g0007.m0001	FUN_013010-T1	PA_chr09_G003783	PS_chr11_G045264	PS_chr09_G038070	GO:0003677; GO:0005634; GO:0006355	DNA binding; nucleus; regulation of transcription, DNA	AT3G61850	DAG1	dof affecting germination 1	Dof-type zinc finger DNA-binding family protein Dof-type zinc finger DNA-binding family protein	Potri.014G100900; Potri.012G018700; Potri.002G174300; Potri.015G009300
OG0000039	OG0000039_863	0.000658602	Potra2n14c27144	Bpev01.c0368.g0007.m0001	FUN_013010-T1	PA_chr09_G003783	PS_chr11_G045264	PS_chr09_G038070	GO:0003677; GO:0005634; GO:0006355	DNA binding; nucleus; regulation of transcription, DNA	AT3G61850	DAG1	dof affecting germination 1	Dof-type zinc finger DNA-binding family protein Dof-type zinc finger DNA-binding family protein	Potri.014G100900; Potri.012G018700; Potri.002G174300; Potri.015G009300
OG0000039	OG0000039_865	0.0155836	Potra2n3c8126	Bpev01.c0368.g0007.m0001	FUN_013010-T1	PA_chr08_G003418	PS_chr11_G045264	PS_chr09_G038070	GO:0003677; GO:0005634; GO:0006355	DNA binding; nucleus; regulation of transcription, DNA	AT3G21270	ADOF2; DOF2	DOF zinc finger protein 2	DOF zinc finger protein 2 DOF zinc finger protein 2	Potri.003G034200; Potri.011G047500; Potri.004G038800
OG0000039	OG0000039_867	0.000477265	Potra2n14c27144	Bpev01.c0368.g0007.m0001	FUN_013010-T1	PA_chr08_G003418	PS_chr11_G045264	PS_chr09_G038070	GO:0003677; GO:0005634; GO:0006355	DNA binding; nucleus; regulation of transcription, DNA	AT3G61850	DAG1	dof affecting germination 1	Dof-type zinc finger DNA-binding family protein Dof-type zinc finger DNA-binding family protein	Potri.014G100900; Potri.012G018700; Potri.002G174300; Potri.015G009300
OG0000039	OG0000039_868	7.53631e-05	Potra2n2c4829	Bpev01.c0368.g0007.m0001	FUN_013010-T1	PA_chr08_G003418	PS_chr11_G045264	PS_chr09_G038070	GO:0003677; GO:0005634; GO:0006355	DNA binding; nucleus; regulation of transcription, DNA	AT3G61850	DAG1	dof affecting germination 1	Dof-type zinc finger DNA-binding family protein Dof-type zinc finger DNA-binding family protein	Potri.014G100900; Potri.012G018700; Potri.002G174300; Potri.015G009300
OG0000039	OG0000039_872	0.0203587	Potra2n2c4829	Bpev01.c0368.g0007.m0001	FUN_013010-T1	PA_chr09_G001556	PS_chr11_G045264	PS_chr09_G038070	GO:0003677; GO:0005634; GO:0006355	DNA binding; nucleus; regulation of transcription, DNA	AT3G61850	DAG1	dof affecting germination 1	Dof-type zinc finger DNA-binding family protein Dof-type zinc finger DNA-binding family protein	Potri.014G100900; Potri.012G018700; Potri.002G174300; Potri.015G009300
OG0000039	OG0000039_873	0.0136836	Potra2n12c23811	Bpev01.c0368.g0007.m0001	FUN_019322-T1	PA_chr09_G003783	PS_chr08_G035003	PS_chr09_G038070	GO:0003677; GO:0005634; GO:0006355	DNA binding; nucleus; regulation of transcription, DNA	AT3G61850	DAG1	dof affecting germination 1	Dof-type zinc finger DNA-binding family protein Dof-type zinc finger DNA-binding family protein	Potri.014G100900; Potri.012G018700; Potri.002G174300; Potri.015G009300
OG0000039	OG0000039_874	0.00589315	Potra2n4c8808	Bpev01.c0368.g0007.m0001	FUN_019322-T1	PA_chr09_G003783	PS_chr08_G035003	PS_chr09_G038070	GO:0003677; GO:0005634; GO:0006355	DNA binding; nucleus; regulation of transcription, DNA	AT1G28310	NA	NA	Dof-type zinc finger DNA-binding family protein Dof-type zinc finger DNA-binding family protein	Potri.011G055600; Potri.011G054300; Potri.004G046600; Potri.004G046100
OG0000039	OG0000039_875	0.00588369	Potra2n2c4829	Bpev01.c0368.g0007.m0001	FUN_019322-T1	PA_chr09_G003783	PS_chr08_G035003	PS_chr09_G038070	GO:0003677; GO:0005634; GO:0006355	DNA binding; nucleus; regulation of transcription, DNA	AT3G61850	DAG1	dof affecting germination 1	Dof-type zinc finger DNA-binding family protein Dof-type zinc finger DNA-binding family protein	Potri.014G100900; Potri.012G018700; Potri.002G174300; Potri.015G009300
OG0000039	OG0000039_876	0.00646694	Potra2n14c27144	Bpev01.c0368.g0007.m0001	FUN_019322-T1	PA_chr09_G003783	PS_chr08_G035003	PS_chr09_G038070	GO:0003677; GO:0005634; GO:0006355	DNA binding; nucleus; regulation of transcription, DNA	AT3G61850	DAG1	dof affecting germination 1	Dof-type zinc finger DNA-binding family protein Dof-type zinc finger DNA-binding family protein	Potri.014G100900; Potri.012G018700; Potri.002G174300; Potri.015G009300
OG0000039	OG0000039_877	0.0101073	Potra2n203s34938	Bpev01.c0368.g0007.m0001	FUN_019322-T1	PA_chr09_G003783	PS_chr08_G035003	PS_chr09_G038070	GO:0003677; GO:0005634; GO:0006355	DNA binding; nucleus; regulation of transcription, DNA	AT5G60200	TMO6	TARGET OF MONOPTEROS 6	TARGET OF MONOPTEROS 6 TARGET OF MONOPTEROS 6	Potri.005G134200; Potri.010G204800
OG0000039	OG0000039_878	0.00732034	Potra2n3c7191	Bpev01.c0368.g0007.m0001	FUN_019322-T1	PA_chr09_G003783	PS_chr08_G035003	PS_chr09_G038070	GO:0003677; GO:0005634; GO:0006355	DNA binding; nucleus; regulation of transcription, DNA	AT4G24060	NA	NA	Dof-type zinc finger DNA-binding family protein Dof-type zinc finger DNA-binding family protein	Potri.003G144500; Potri.001G086400
OG0000039	OG0000039_879	0.0133268	Potra2n15c28772	Bpev01.c0368.g0007.m0001	FUN_019322-T1	PA_chr09_G003783	PS_chr08_G035003	PS_chr09_G038070	GO:0003677; GO:0005634; GO:0006355	DNA binding; nucleus; regulation of transcription, DNA	AT5G60850	OBP4	OBF binding protein 4	OBF binding protein 4 OBF binding protein 4	Potri.011G054300; Potri.015G048300; Potri.012G063800; Potri.004G046100
OG0000039	OG0000039_880	0.0200336	Potra2n394s35532	Bpev01.c0368.g0007.m0001	FUN_019322-T1	PA_chr09_G003783	PS_chr08_G035003	PS_chr09_G038070	GO:0003677; GO:0005634; GO:0006355	DNA binding; nucleus; regulation of transcription, DNA	AT5G60850	OBP4	OBF binding protein 4	OBF binding protein 4 OBF binding protein 4	Potri.011G054300; Potri.015G048300; Potri.012G063800; Potri.004G046100
OG0000039	OG0000039_881	0.00637494	Potra2n1c710	Bpev01.c0368.g0007.m0001	FUN_019322-T1	PA_chr09_G003783	PS_chr08_G035003	PS_chr09_G038070	GO:0003677; GO:0005634; GO:0006355	DNA binding; nucleus; regulation of transcription, DNA	AT4G24060	NA	NA	Dof-type zinc finger DNA-binding family protein Dof-type zinc finger DNA-binding family protein	Potri.003G144500; Potri.001G086400
OG0000039	OG0000039_882	0.0221669	Potra2n12c23811	Bpev01.c0368.g0007.m0001	FUN_019322-T1	PA_chr08_G003418	PS_chr08_G035003	PS_chr09_G038070	GO:0003677; GO:0005634; GO:0006355	DNA binding; nucleus; regulation of transcription, DNA	AT3G61850	DAG1	dof affecting germination 1	Dof-type zinc finger DNA-binding family protein Dof-type zinc finger DNA-binding family protein	Potri.014G100900; Potri.012G018700; Potri.002G174300; Potri.015G009300
OG0000039	OG0000039_883	0.0213919	Potra2n3c8126	Bpev01.c0368.g0007.m0001	FUN_019322-T1	PA_chr08_G003418	PS_chr08_G035003	PS_chr09_G038070	GO:0003677; GO:0005634; GO:0006355	DNA binding; nucleus; regulation of transcription, DNA	AT3G21270	ADOF2; DOF2	DOF zinc finger protein 2	DOF zinc finger protein 2 DOF zinc finger protein 2	Potri.003G034200; Potri.011G047500; Potri.004G038800
OG0000039	OG0000039_884	0.00589315	Potra2n4c8808	Bpev01.c0368.g0007.m0001	FUN_019322-T1	PA_chr08_G003418	PS_chr08_G035003	PS_chr09_G038070	GO:0003677; GO:0005634; GO:0006355	DNA binding; nucleus; regulation of transcription, DNA	AT1G28310	NA	NA	Dof-type zinc finger DNA-binding family protein Dof-type zinc finger DNA-binding family protein	Potri.011G055600; Potri.011G054300; Potri.004G046600; Potri.004G046100
OG0000039	OG0000039_885	0.0062856	Potra2n14c27144	Bpev01.c0368.g0007.m0001	FUN_019322-T1	PA_chr08_G003418	PS_chr08_G035003	PS_chr09_G038070	GO:0003677; GO:0005634; GO:0006355	DNA binding; nucleus; regulation of transcription, DNA	AT3G61850	DAG1	dof affecting germination 1	Dof-type zinc finger DNA-binding family protein Dof-type zinc finger DNA-binding family protein	Potri.014G100900; Potri.012G018700; Potri.002G174300; Potri.015G009300
OG0000039	OG0000039_886	0.0058837	Potra2n2c4829	Bpev01.c0368.g0007.m0001	FUN_019322-T1	PA_chr08_G003418	PS_chr08_G035003	PS_chr09_G038070	GO:0003677; GO:0005634; GO:0006355	DNA binding; nucleus; regulation of transcription, DNA	AT3G61850	DAG1	dof affecting germination 1	Dof-type zinc finger DNA-binding family protein Dof-type zinc finger DNA-binding family protein	Potri.014G100900; Potri.012G018700; Potri.002G174300; Potri.015G009300
OG0000039	OG0000039_887	0.0104686	Potra2n203s34938	Bpev01.c0368.g0007.m0001	FUN_019322-T1	PA_chr08_G003418	PS_chr08_G035003	PS_chr09_G038070	GO:0003677; GO:0005634; GO:0006355	DNA binding; nucleus; regulation of transcription, DNA	AT5G60200	TMO6	TARGET OF MONOPTEROS 6	TARGET OF MONOPTEROS 6 TARGET OF MONOPTEROS 6	Potri.005G134200; Potri.010G204800
OG0000039	OG0000039_888	0.0133268	Potra2n15c28772	Bpev01.c0368.g0007.m0001	FUN_019322-T1	PA_chr08_G003418	PS_chr08_G035003	PS_chr09_G038070	GO:0003677; GO:0005634; GO:0006355	DNA binding; nucleus; regulation of transcription, DNA	AT5G60850	OBP4	OBF binding protein 4	OBF binding protein 4 OBF binding protein 4	Potri.011G054300; Potri.015G048300; Potri.012G063800; Potri.004G046100
OG0000039	OG0000039_889	0.0200336	Potra2n394s35532	Bpev01.c0368.g0007.m0001	FUN_019322-T1	PA_chr08_G003418	PS_chr08_G035003	PS_chr09_G038070	GO:0003677; GO:0005634; GO:0006355	DNA binding; nucleus; regulation of transcription, DNA	AT5G60850	OBP4	OBF binding protein 4	OBF binding protein 4 OBF binding protein 4	Potri.011G054300; Potri.015G048300; Potri.012G063800; Potri.004G046100
OG0000039	OG0000039_890	0.00637494	Potra2n1c710	Bpev01.c0368.g0007.m0001	FUN_019322-T1	PA_chr08_G003418	PS_chr08_G035003	PS_chr09_G038070	GO:0003677; GO:0005634; GO:0006355	DNA binding; nucleus; regulation of transcription, DNA	AT4G24060	NA	NA	Dof-type zinc finger DNA-binding family protein Dof-type zinc finger DNA-binding family protein	Potri.003G144500; Potri.001G086400
OG0000039	OG0000039_891	0.00714279	Potra2n12c23811	Bpev01.c0368.g0007.m0001	FUN_019322-T1	PA_chr09_G001556	PS_chr08_G035003	PS_chr09_G038070	GO:0003677; GO:0005634; GO:0006355	DNA binding; nucleus; regulation of transcription, DNA	AT3G61850	DAG1	dof affecting germination 1	Dof-type zinc finger DNA-binding family protein Dof-type zinc finger DNA-binding family protein	Potri.014G100900; Potri.012G018700; Potri.002G174300; Potri.015G009300
OG0000039	OG0000039_892	0.0200628	Potra2n3c8126	Bpev01.c0368.g0007.m0001	FUN_019322-T1	PA_chr09_G001556	PS_chr08_G035003	PS_chr09_G038070	GO:0003677; GO:0005634; GO:0006355	DNA binding; nucleus; regulation of transcription, DNA	AT3G21270	ADOF2; DOF2	DOF zinc finger protein 2	DOF zinc finger protein 2 DOF zinc finger protein 2	Potri.003G034200; Potri.011G047500; Potri.004G038800
OG0000039	OG0000039_893	0.00628067	Potra2n4c8808	Bpev01.c0368.g0007.m0001	FUN_019322-T1	PA_chr09_G001556	PS_chr08_G035003	PS_chr09_G038070	GO:0003677; GO:0005634; GO:0006355	DNA binding; nucleus; regulation of transcription, DNA	AT1G28310	NA	NA	Dof-type zinc finger DNA-binding family protein Dof-type zinc finger DNA-binding family protein	Potri.011G055600; Potri.011G054300; Potri.004G046600; Potri.004G046100
OG0000039	OG0000039_894	0.0164045	Potra2n2c4829	Bpev01.c0368.g0007.m0001	FUN_019322-T1	PA_chr09_G001556	PS_chr08_G035003	PS_chr09_G038070	GO:0003677; GO:0005634; GO:0006355	DNA binding; nucleus; regulation of transcription, DNA	AT3G61850	DAG1	dof affecting germination 1	Dof-type zinc finger DNA-binding family protein Dof-type zinc finger DNA-binding family protein	Potri.014G100900; Potri.012G018700; Potri.002G174300; Potri.015G009300
OG0000039	OG0000039_895	0.0121643	Potra2n15c28772	Bpev01.c0368.g0007.m0001	FUN_019322-T1	PA_chr09_G001556	PS_chr08_G035003	PS_chr09_G038070	GO:0003677; GO:0005634; GO:0006355	DNA binding; nucleus; regulation of transcription, DNA	AT5G60850	OBP4	OBF binding protein 4	OBF binding protein 4 OBF binding protein 4	Potri.011G054300; Potri.015G048300; Potri.012G063800; Potri.004G046100
OG0000039	OG0000039_896	0.0200545	Potra2n394s35532	Bpev01.c0368.g0007.m0001	FUN_019322-T1	PA_chr09_G001556	PS_chr08_G035003	PS_chr09_G038070	GO:0003677; GO:0005634; GO:0006355	DNA binding; nucleus; regulation of transcription, DNA	AT5G60850	OBP4	OBF binding protein 4	OBF binding protein 4 OBF binding protein 4	Potri.011G054300; Potri.015G048300; Potri.012G063800; Potri.004G046100
OG0000039	OG0000039_897	0.00588785	Potra2n3c7191	Bpev01.c0368.g0007.m0001	FUN_019322-T1	PA_chr09_G001556	PS_chr08_G035003	PS_chr09_G038070	GO:0003677; GO:0005634; GO:0006355	DNA binding; nucleus; regulation of transcription, DNA	AT4G24060	NA	NA	Dof-type zinc finger DNA-binding family protein Dof-type zinc finger DNA-binding family protein	Potri.003G144500; Potri.001G086400
OG0000039	OG0000039_898	0.00671412	Potra2n1c710	Bpev01.c0368.g0007.m0001	FUN_019322-T1	PA_chr09_G001556	PS_chr08_G035003	PS_chr09_G038070	GO:0003677; GO:0005634; GO:0006355	DNA binding; nucleus; regulation of transcription, DNA	AT4G24060	NA	NA	Dof-type zinc finger DNA-binding family protein Dof-type zinc finger DNA-binding family protein	Potri.003G144500; Potri.001G086400
OG0000039	OG0000039_900	0.0208722	Potra2n4c8808	Bpev01.c0368.g0007.m0001	FUN_032079-T1	PA_chr09_G003783	PS_chr08_G035003	PS_chr09_G038070	GO:0003677; GO:0005634; GO:0006355	DNA binding; nucleus; regulation of transcription, DNA	AT1G28310	NA	NA	Dof-type zinc finger DNA-binding family protein Dof-type zinc finger DNA-binding family protein	Potri.011G055600; Potri.011G054300; Potri.004G046600; Potri.004G046100
OG0000039	OG0000039_901	0.0208627	Potra2n2c4829	Bpev01.c0368.g0007.m0001	FUN_032079-T1	PA_chr09_G003783	PS_chr08_G035003	PS_chr09_G038070	GO:0003677; GO:0005634; GO:0006355	DNA binding; nucleus; regulation of transcription, DNA	AT3G61850	DAG1	dof affecting germination 1	Dof-type zinc finger DNA-binding family protein Dof-type zinc finger DNA-binding family protein	Potri.014G100900; Potri.012G018700; Potri.002G174300; Potri.015G009300
OG0000039	OG0000039_902	0.021446	Potra2n14c27144	Bpev01.c0368.g0007.m0001	FUN_032079-T1	PA_chr09_G003783	PS_chr08_G035003	PS_chr09_G038070	GO:0003677; GO:0005634; GO:0006355	DNA binding; nucleus; regulation of transcription, DNA	AT3G61850	DAG1	dof affecting germination 1	Dof-type zinc finger DNA-binding family protein Dof-type zinc finger DNA-binding family protein	Potri.014G100900; Potri.012G018700; Potri.002G174300; Potri.015G009300
OG0000039	OG0000039_903	0.0250863	Potra2n203s34938	Bpev01.c0368.g0007.m0001	FUN_032079-T1	PA_chr09_G003783	PS_chr08_G035003	PS_chr09_G038070	GO:0003677; GO:0005634; GO:0006355	DNA binding; nucleus; regulation of transcription, DNA	AT5G60200	TMO6	TARGET OF MONOPTEROS 6	TARGET OF MONOPTEROS 6 TARGET OF MONOPTEROS 6	Potri.005G134200; Potri.010G204800
OG0000039	OG0000039_905	0.0218325	Potra2n15c28772	Bpev01.c0368.g0007.m0001	FUN_032079-T1	PA_chr09_G003783	PS_chr08_G035003	PS_chr09_G038070	GO:0003677; GO:0005634; GO:0006355	DNA binding; nucleus; regulation of transcription, DNA	AT5G60850	OBP4	OBF binding protein 4	OBF binding protein 4 OBF binding protein 4	Potri.011G054300; Potri.015G048300; Potri.012G063800; Potri.004G046100
OG0000039	OG0000039_907	0.021354	Potra2n1c710	Bpev01.c0368.g0007.m0001	FUN_032079-T1	PA_chr09_G003783	PS_chr08_G035003	PS_chr09_G038070	GO:0003677; GO:0005634; GO:0006355	DNA binding; nucleus; regulation of transcription, DNA	AT4G24060	NA	NA	Dof-type zinc finger DNA-binding family protein Dof-type zinc finger DNA-binding family protein	Potri.003G144500; Potri.001G086400
OG0000039	OG0000039_909	0.036371	Potra2n3c8126	Bpev01.c0368.g0007.m0001	FUN_032079-T1	PA_chr08_G003418	PS_chr08_G035003	PS_chr09_G038070	GO:0003677; GO:0005634; GO:0006355	DNA binding; nucleus; regulation of transcription, DNA	AT3G21270	ADOF2; DOF2	DOF zinc finger protein 2	DOF zinc finger protein 2 DOF zinc finger protein 2	Potri.003G034200; Potri.011G047500; Potri.004G038800
OG0000039	OG0000039_910	0.0208722	Potra2n4c8808	Bpev01.c0368.g0007.m0001	FUN_032079-T1	PA_chr08_G003418	PS_chr08_G035003	PS_chr09_G038070	GO:0003677; GO:0005634; GO:0006355	DNA binding; nucleus; regulation of transcription, DNA	AT1G28310	NA	NA	Dof-type zinc finger DNA-binding family protein Dof-type zinc finger DNA-binding family protein	Potri.011G055600; Potri.011G054300; Potri.004G046600; Potri.004G046100
OG0000039	OG0000039_911	0.0212646	Potra2n14c27144	Bpev01.c0368.g0007.m0001	FUN_032079-T1	PA_chr08_G003418	PS_chr08_G035003	PS_chr09_G038070	GO:0003677; GO:0005634; GO:0006355	DNA binding; nucleus; regulation of transcription, DNA	AT3G61850	DAG1	dof affecting germination 1	Dof-type zinc finger DNA-binding family protein Dof-type zinc finger DNA-binding family protein	Potri.014G100900; Potri.012G018700; Potri.002G174300; Potri.015G009300
OG0000039	OG0000039_912	0.0208627	Potra2n2c4829	Bpev01.c0368.g0007.m0001	FUN_032079-T1	PA_chr08_G003418	PS_chr08_G035003	PS_chr09_G038070	GO:0003677; GO:0005634; GO:0006355	DNA binding; nucleus; regulation of transcription, DNA	AT3G61850	DAG1	dof affecting germination 1	Dof-type zinc finger DNA-binding family protein Dof-type zinc finger DNA-binding family protein	Potri.014G100900; Potri.012G018700; Potri.002G174300; Potri.015G009300
OG0000039	OG0000039_913	0.0254476	Potra2n203s34938	Bpev01.c0368.g0007.m0001	FUN_032079-T1	PA_chr08_G003418	PS_chr08_G035003	PS_chr09_G038070	GO:0003677; GO:0005634; GO:0006355	DNA binding; nucleus; regulation of transcription, DNA	AT5G60200	TMO6	TARGET OF MONOPTEROS 6	TARGET OF MONOPTEROS 6 TARGET OF MONOPTEROS 6	Potri.005G134200; Potri.010G204800
OG0000039	OG0000039_914	0.0218325	Potra2n15c28772	Bpev01.c0368.g0007.m0001	FUN_032079-T1	PA_chr08_G003418	PS_chr08_G035003	PS_chr09_G038070	GO:0003677; GO:0005634; GO:0006355	DNA binding; nucleus; regulation of transcription, DNA	AT5G60850	OBP4	OBF binding protein 4	OBF binding protein 4 OBF binding protein 4	Potri.011G054300; Potri.015G048300; Potri.012G063800; Potri.004G046100
OG0000039	OG0000039_916	0.021354	Potra2n1c710	Bpev01.c0368.g0007.m0001	FUN_032079-T1	PA_chr08_G003418	PS_chr08_G035003	PS_chr09_G038070	GO:0003677; GO:0005634; GO:0006355	DNA binding; nucleus; regulation of transcription, DNA	AT4G24060	NA	NA	Dof-type zinc finger DNA-binding family protein Dof-type zinc finger DNA-binding family protein	Potri.003G144500; Potri.001G086400
OG0000039	OG0000039_918	0.0350418	Potra2n3c8126	Bpev01.c0368.g0007.m0001	FUN_032079-T1	PA_chr09_G001556	PS_chr08_G035003	PS_chr09_G038070	GO:0003677; GO:0005634; GO:0006355	DNA binding; nucleus; regulation of transcription, DNA	AT3G21270	ADOF2; DOF2	DOF zinc finger protein 2	DOF zinc finger protein 2 DOF zinc finger protein 2	Potri.003G034200; Potri.011G047500; Potri.004G038800
OG0000039	OG0000039_919	0.0212597	Potra2n4c8808	Bpev01.c0368.g0007.m0001	FUN_032079-T1	PA_chr09_G001556	PS_chr08_G035003	PS_chr09_G038070	GO:0003677; GO:0005634; GO:0006355	DNA binding; nucleus; regulation of transcription, DNA	AT1G28310	NA	NA	Dof-type zinc finger DNA-binding family protein Dof-type zinc finger DNA-binding family protein	Potri.011G055600; Potri.011G054300; Potri.004G046600; Potri.004G046100
OG0000039	OG0000039_920	0.0313836	Potra2n2c4829	Bpev01.c0368.g0007.m0001	FUN_032079-T1	PA_chr09_G001556	PS_chr08_G035003	PS_chr09_G038070	GO:0003677; GO:0005634; GO:0006355	DNA binding; nucleus; regulation of transcription, DNA	AT3G61850	DAG1	dof affecting germination 1	Dof-type zinc finger DNA-binding family protein Dof-type zinc finger DNA-binding family protein	Potri.014G100900; Potri.012G018700; Potri.002G174300; Potri.015G009300
OG0000039	OG0000039_921	0.0271433	Potra2n15c28772	Bpev01.c0368.g0007.m0001	FUN_032079-T1	PA_chr09_G001556	PS_chr08_G035003	PS_chr09_G038070	GO:0003677; GO:0005634; GO:0006355	DNA binding; nucleus; regulation of transcription, DNA	AT5G60850	OBP4	OBF binding protein 4	OBF binding protein 4 OBF binding protein 4	Potri.011G054300; Potri.015G048300; Potri.012G063800; Potri.004G046100
OG0000039	OG0000039_923	0.0208669	Potra2n3c7191	Bpev01.c0368.g0007.m0001	FUN_032079-T1	PA_chr09_G001556	PS_chr08_G035003	PS_chr09_G038070	GO:0003677; GO:0005634; GO:0006355	DNA binding; nucleus; regulation of transcription, DNA	AT4G24060	NA	NA	Dof-type zinc finger DNA-binding family protein Dof-type zinc finger DNA-binding family protein	Potri.003G144500; Potri.001G086400
OG0000039	OG0000039_924	0.0216932	Potra2n1c710	Bpev01.c0368.g0007.m0001	FUN_032079-T1	PA_chr09_G001556	PS_chr08_G035003	PS_chr09_G038070	GO:0003677; GO:0005634; GO:0006355	DNA binding; nucleus; regulation of transcription, DNA	AT4G24060	NA	NA	Dof-type zinc finger DNA-binding family protein Dof-type zinc finger DNA-binding family protein	Potri.003G144500; Potri.001G086400
OG0000039	OG0000039_926	0.00596788	Potra2n4c8808	Bpev01.c0368.g0007.m0001	FUN_013010-T1	PA_chr09_G003783	PS_chr08_G035003	PS_chr09_G038070	GO:0003677; GO:0005634; GO:0006355	DNA binding; nucleus; regulation of transcription, DNA	AT1G28310	NA	NA	Dof-type zinc finger DNA-binding family protein Dof-type zinc finger DNA-binding family protein	Potri.011G055600; Potri.011G054300; Potri.004G046600; Potri.004G046100
OG0000039	OG0000039_927	0.00595842	Potra2n2c4829	Bpev01.c0368.g0007.m0001	FUN_013010-T1	PA_chr09_G003783	PS_chr08_G035003	PS_chr09_G038070	GO:0003677; GO:0005634; GO:0006355	DNA binding; nucleus; regulation of transcription, DNA	AT3G61850	DAG1	dof affecting germination 1	Dof-type zinc finger DNA-binding family protein Dof-type zinc finger DNA-binding family protein	Potri.014G100900; Potri.012G018700; Potri.002G174300; Potri.015G009300
OG0000039	OG0000039_928	0.00654167	Potra2n14c27144	Bpev01.c0368.g0007.m0001	FUN_013010-T1	PA_chr09_G003783	PS_chr08_G035003	PS_chr09_G038070	GO:0003677; GO:0005634; GO:0006355	DNA binding; nucleus; regulation of transcription, DNA	AT3G61850	DAG1	dof affecting germination 1	Dof-type zinc finger DNA-binding family protein Dof-type zinc finger DNA-binding family protein	Potri.014G100900; Potri.012G018700; Potri.002G174300; Potri.015G009300
OG0000039	OG0000039_931	0.00644967	Potra2n1c710	Bpev01.c0368.g0007.m0001	FUN_013010-T1	PA_chr09_G003783	PS_chr08_G035003	PS_chr09_G038070	GO:0003677; GO:0005634; GO:0006355	DNA binding; nucleus; regulation of transcription, DNA	AT4G24060	NA	NA	Dof-type zinc finger DNA-binding family protein Dof-type zinc finger DNA-binding family protein	Potri.003G144500; Potri.001G086400
OG0000039	OG0000039_933	0.0214667	Potra2n3c8126	Bpev01.c0368.g0007.m0001	FUN_013010-T1	PA_chr08_G003418	PS_chr08_G035003	PS_chr09_G038070	GO:0003677; GO:0005634; GO:0006355	DNA binding; nucleus; regulation of transcription, DNA	AT3G21270	ADOF2; DOF2	DOF zinc finger protein 2	DOF zinc finger protein 2 DOF zinc finger protein 2	Potri.003G034200; Potri.011G047500; Potri.004G038800
OG0000039	OG0000039_934	0.00596788	Potra2n4c8808	Bpev01.c0368.g0007.m0001	FUN_013010-T1	PA_chr08_G003418	PS_chr08_G035003	PS_chr09_G038070	GO:0003677; GO:0005634; GO:0006355	DNA binding; nucleus; regulation of transcription, DNA	AT1G28310	NA	NA	Dof-type zinc finger DNA-binding family protein Dof-type zinc finger DNA-binding family protein	Potri.011G055600; Potri.011G054300; Potri.004G046600; Potri.004G046100
OG0000039	OG0000039_935	0.00636033	Potra2n14c27144	Bpev01.c0368.g0007.m0001	FUN_013010-T1	PA_chr08_G003418	PS_chr08_G035003	PS_chr09_G038070	GO:0003677; GO:0005634; GO:0006355	DNA binding; nucleus; regulation of transcription, DNA	AT3G61850	DAG1	dof affecting germination 1	Dof-type zinc finger DNA-binding family protein Dof-type zinc finger DNA-binding family protein	Potri.014G100900; Potri.012G018700; Potri.002G174300; Potri.015G009300
OG0000039	OG0000039_936	0.00595843	Potra2n2c4829	Bpev01.c0368.g0007.m0001	FUN_013010-T1	PA_chr08_G003418	PS_chr08_G035003	PS_chr09_G038070	GO:0003677; GO:0005634; GO:0006355	DNA binding; nucleus; regulation of transcription, DNA	AT3G61850	DAG1	dof affecting germination 1	Dof-type zinc finger DNA-binding family protein Dof-type zinc finger DNA-binding family protein	Potri.014G100900; Potri.012G018700; Potri.002G174300; Potri.015G009300
OG0000039	OG0000039_939	0.00644967	Potra2n1c710	Bpev01.c0368.g0007.m0001	FUN_013010-T1	PA_chr08_G003418	PS_chr08_G035003	PS_chr09_G038070	GO:0003677; GO:0005634; GO:0006355	DNA binding; nucleus; regulation of transcription, DNA	AT4G24060	NA	NA	Dof-type zinc finger DNA-binding family protein Dof-type zinc finger DNA-binding family protein	Potri.003G144500; Potri.001G086400
OG0000039	OG0000039_940	0.00721752	Potra2n12c23811	Bpev01.c0368.g0007.m0001	FUN_013010-T1	PA_chr09_G001556	PS_chr08_G035003	PS_chr09_G038070	GO:0003677; GO:0005634; GO:0006355	DNA binding; nucleus; regulation of transcription, DNA	AT3G61850	DAG1	dof affecting germination 1	Dof-type zinc finger DNA-binding family protein Dof-type zinc finger DNA-binding family protein	Potri.014G100900; Potri.012G018700; Potri.002G174300; Potri.015G009300
OG0000039	OG0000039_941	0.0201375	Potra2n3c8126	Bpev01.c0368.g0007.m0001	FUN_013010-T1	PA_chr09_G001556	PS_chr08_G035003	PS_chr09_G038070	GO:0003677; GO:0005634; GO:0006355	DNA binding; nucleus; regulation of transcription, DNA	AT3G21270	ADOF2; DOF2	DOF zinc finger protein 2	DOF zinc finger protein 2 DOF zinc finger protein 2	Potri.003G034200; Potri.011G047500; Potri.004G038800
OG0000039	OG0000039_942	0.0063554	Potra2n4c8808	Bpev01.c0368.g0007.m0001	FUN_013010-T1	PA_chr09_G001556	PS_chr08_G035003	PS_chr09_G038070	GO:0003677; GO:0005634; GO:0006355	DNA binding; nucleus; regulation of transcription, DNA	AT1G28310	NA	NA	Dof-type zinc finger DNA-binding family protein Dof-type zinc finger DNA-binding family protein	Potri.011G055600; Potri.011G054300; Potri.004G046600; Potri.004G046100
OG0000039	OG0000039_943	0.0164793	Potra2n2c4829	Bpev01.c0368.g0007.m0001	FUN_013010-T1	PA_chr09_G001556	PS_chr08_G035003	PS_chr09_G038070	GO:0003677; GO:0005634; GO:0006355	DNA binding; nucleus; regulation of transcription, DNA	AT3G61850	DAG1	dof affecting germination 1	Dof-type zinc finger DNA-binding family protein Dof-type zinc finger DNA-binding family protein	Potri.014G100900; Potri.012G018700; Potri.002G174300; Potri.015G009300
OG0000039	OG0000039_944	0.012239	Potra2n15c28772	Bpev01.c0368.g0007.m0001	FUN_013010-T1	PA_chr09_G001556	PS_chr08_G035003	PS_chr09_G038070	GO:0003677; GO:0005634; GO:0006355	DNA binding; nucleus; regulation of transcription, DNA	AT5G60850	OBP4	OBF binding protein 4	OBF binding protein 4 OBF binding protein 4	Potri.011G054300; Potri.015G048300; Potri.012G063800; Potri.004G046100
OG0000039	OG0000039_945	0.0201292	Potra2n394s35532	Bpev01.c0368.g0007.m0001	FUN_013010-T1	PA_chr09_G001556	PS_chr08_G035003	PS_chr09_G038070	GO:0003677; GO:0005634; GO:0006355	DNA binding; nucleus; regulation of transcription, DNA	AT5G60850	OBP4	OBF binding protein 4	OBF binding protein 4 OBF binding protein 4	Potri.011G054300; Potri.015G048300; Potri.012G063800; Potri.004G046100
OG0000039	OG0000039_946	0.00678885	Potra2n1c710	Bpev01.c0368.g0007.m0001	FUN_013010-T1	PA_chr09_G001556	PS_chr08_G035003	PS_chr09_G038070	GO:0003677; GO:0005634; GO:0006355	DNA binding; nucleus; regulation of transcription, DNA	AT4G24060	NA	NA	Dof-type zinc finger DNA-binding family protein Dof-type zinc finger DNA-binding family protein	Potri.003G144500; Potri.001G086400
OG0000039	OG0000039_948	0.00773342	Potra2n2c4829	Bpev01.c0368.g0007.m0001	FUN_026351-T1	PA_chr09_G003783	PS_chr08_G035003	PS_chr09_G038070	GO:0003677; GO:0005634; GO:0006355	DNA binding; nucleus; regulation of transcription, DNA	AT3G61850	DAG1	dof affecting germination 1	Dof-type zinc finger DNA-binding family protein Dof-type zinc finger DNA-binding family protein	Potri.014G100900; Potri.012G018700; Potri.002G174300; Potri.015G009300
OG0000039	OG0000039_949	0.00775984	Potra2n15c28772	Bpev01.c0368.g0007.m0001	FUN_026351-T1	PA_chr09_G003783	PS_chr08_G035003	PS_chr09_G038070	GO:0003677; GO:0005634; GO:0006355	DNA binding; nucleus; regulation of transcription, DNA	AT5G60850	OBP4	OBF binding protein 4	OBF binding protein 4 OBF binding protein 4	Potri.011G054300; Potri.015G048300; Potri.012G063800; Potri.004G046100
OG0000039	OG0000039_951	0.00822467	Potra2n1c710	Bpev01.c0368.g0007.m0001	FUN_026351-T1	PA_chr09_G003783	PS_chr08_G035003	PS_chr09_G038070	GO:0003677; GO:0005634; GO:0006355	DNA binding; nucleus; regulation of transcription, DNA	AT4G24060	NA	NA	Dof-type zinc finger DNA-binding family protein Dof-type zinc finger DNA-binding family protein	Potri.003G144500; Potri.001G086400
OG0000039	OG0000039_952	0.0077334	Potra2n3c7191	Bpev01.c0368.g0007.m0001	FUN_026351-T1	PA_chr09_G003783	PS_chr08_G035003	PS_chr09_G038070	GO:0003677; GO:0005634; GO:0006355	DNA binding; nucleus; regulation of transcription, DNA	AT4G24060	NA	NA	Dof-type zinc finger DNA-binding family protein Dof-type zinc finger DNA-binding family protein	Potri.003G144500; Potri.001G086400
OG0000039	OG0000039_954	0.0232417	Potra2n3c8126	Bpev01.c0368.g0007.m0001	FUN_026351-T1	PA_chr08_G003418	PS_chr08_G035003	PS_chr09_G038070	GO:0003677; GO:0005634; GO:0006355	DNA binding; nucleus; regulation of transcription, DNA	AT3G21270	ADOF2; DOF2	DOF zinc finger protein 2	DOF zinc finger protein 2 DOF zinc finger protein 2	Potri.003G034200; Potri.011G047500; Potri.004G038800
OG0000039	OG0000039_955	0.00773343	Potra2n2c4829	Bpev01.c0368.g0007.m0001	FUN_026351-T1	PA_chr08_G003418	PS_chr08_G035003	PS_chr09_G038070	GO:0003677; GO:0005634; GO:0006355	DNA binding; nucleus; regulation of transcription, DNA	AT3G61850	DAG1	dof affecting germination 1	Dof-type zinc finger DNA-binding family protein Dof-type zinc finger DNA-binding family protein	Potri.014G100900; Potri.012G018700; Potri.002G174300; Potri.015G009300
OG0000039	OG0000039_958	0.00822467	Potra2n1c710	Bpev01.c0368.g0007.m0001	FUN_026351-T1	PA_chr08_G003418	PS_chr08_G035003	PS_chr09_G038070	GO:0003677; GO:0005634; GO:0006355	DNA binding; nucleus; regulation of transcription, DNA	AT4G24060	NA	NA	Dof-type zinc finger DNA-binding family protein Dof-type zinc finger DNA-binding family protein	Potri.003G144500; Potri.001G086400
OG0000039	OG0000039_959	0.00899252	Potra2n12c23811	Bpev01.c0368.g0007.m0001	FUN_026351-T1	PA_chr09_G001556	PS_chr08_G035003	PS_chr09_G038070	GO:0003677; GO:0005634; GO:0006355	DNA binding; nucleus; regulation of transcription, DNA	AT3G61850	DAG1	dof affecting germination 1	Dof-type zinc finger DNA-binding family protein Dof-type zinc finger DNA-binding family protein	Potri.014G100900; Potri.012G018700; Potri.002G174300; Potri.015G009300
OG0000039	OG0000039_960	0.0219125	Potra2n3c8126	Bpev01.c0368.g0007.m0001	FUN_026351-T1	PA_chr09_G001556	PS_chr08_G035003	PS_chr09_G038070	GO:0003677; GO:0005634; GO:0006355	DNA binding; nucleus; regulation of transcription, DNA	AT3G21270	ADOF2; DOF2	DOF zinc finger protein 2	DOF zinc finger protein 2 DOF zinc finger protein 2	Potri.003G034200; Potri.011G047500; Potri.004G038800
OG0000039	OG0000039_961	0.0182543	Potra2n2c4829	Bpev01.c0368.g0007.m0001	FUN_026351-T1	PA_chr09_G001556	PS_chr08_G035003	PS_chr09_G038070	GO:0003677; GO:0005634; GO:0006355	DNA binding; nucleus; regulation of transcription, DNA	AT3G61850	DAG1	dof affecting germination 1	Dof-type zinc finger DNA-binding family protein Dof-type zinc finger DNA-binding family protein	Potri.014G100900; Potri.012G018700; Potri.002G174300; Potri.015G009300
OG0000039	OG0000039_962	0.014014	Potra2n15c28772	Bpev01.c0368.g0007.m0001	FUN_026351-T1	PA_chr09_G001556	PS_chr08_G035003	PS_chr09_G038070	GO:0003677; GO:0005634; GO:0006355	DNA binding; nucleus; regulation of transcription, DNA	AT5G60850	OBP4	OBF binding protein 4	OBF binding protein 4 OBF binding protein 4	Potri.011G054300; Potri.015G048300; Potri.012G063800; Potri.004G046100
OG0000039	OG0000039_963	0.0219042	Potra2n394s35532	Bpev01.c0368.g0007.m0001	FUN_026351-T1	PA_chr09_G001556	PS_chr08_G035003	PS_chr09_G038070	GO:0003677; GO:0005634; GO:0006355	DNA binding; nucleus; regulation of transcription, DNA	AT5G60850	OBP4	OBF binding protein 4	OBF binding protein 4 OBF binding protein 4	Potri.011G054300; Potri.015G048300; Potri.012G063800; Potri.004G046100
OG0000039	OG0000039_964	0.00856385	Potra2n1c710	Bpev01.c0368.g0007.m0001	FUN_026351-T1	PA_chr09_G001556	PS_chr08_G035003	PS_chr09_G038070	GO:0003677; GO:0005634; GO:0006355	DNA binding; nucleus; regulation of transcription, DNA	AT4G24060	NA	NA	Dof-type zinc finger DNA-binding family protein Dof-type zinc finger DNA-binding family protein	Potri.003G144500; Potri.001G086400
OG0000039	OG0000039_965	0.00773759	Potra2n3c7191	Bpev01.c0368.g0007.m0001	FUN_026351-T1	PA_chr09_G001556	PS_chr08_G035003	PS_chr09_G038070	GO:0003677; GO:0005634; GO:0006355	DNA binding; nucleus; regulation of transcription, DNA	AT4G24060	NA	NA	Dof-type zinc finger DNA-binding family protein Dof-type zinc finger DNA-binding family protein	Potri.003G144500; Potri.001G086400
OG0000039	OG0000039_1015	0.00606501	Potra2n14c27144	Bpev01.c0368.g0007.m0001	FUN_019322-T1	PA_chr09_G003783	PS_chr08_G035003	PS_chr06_G024657	GO:0003677; GO:0005634; GO:0006355	DNA binding; nucleus; regulation of transcription, DNA	AT3G61850	DAG1	dof affecting germination 1	Dof-type zinc finger DNA-binding family protein Dof-type zinc finger DNA-binding family protein	Potri.014G100900; Potri.012G018700; Potri.002G174300; Potri.015G009300
OG0000039	OG0000039_1016	0.00588334	Potra2n2c4829	Bpev01.c0368.g0007.m0001	FUN_019322-T1	PA_chr09_G003783	PS_chr08_G035003	PS_chr06_G024657	GO:0003677; GO:0005634; GO:0006355	DNA binding; nucleus; regulation of transcription, DNA	AT3G61850	DAG1	dof affecting germination 1	Dof-type zinc finger DNA-binding family protein Dof-type zinc finger DNA-binding family protein	Potri.014G100900; Potri.012G018700; Potri.002G174300; Potri.015G009300
OG0000039	OG0000039_1017	0.00594034	Potra2n203s34938	Bpev01.c0368.g0007.m0001	FUN_019322-T1	PA_chr09_G003783	PS_chr08_G035003	PS_chr06_G024657	GO:0003677; GO:0005634; GO:0006355	DNA binding; nucleus; regulation of transcription, DNA	AT5G60200	TMO6	TARGET OF MONOPTEROS 6	TARGET OF MONOPTEROS 6 TARGET OF MONOPTEROS 6	Potri.005G134200; Potri.010G204800
OG0000039	OG0000039_1018	0.0136833	Potra2n12c23811	Bpev01.c0368.g0007.m0001	FUN_019322-T1	PA_chr09_G003783	PS_chr08_G035003	PS_chr06_G024657	GO:0003677; GO:0005634; GO:0006355	DNA binding; nucleus; regulation of transcription, DNA	AT3G61850	DAG1	dof affecting germination 1	Dof-type zinc finger DNA-binding family protein Dof-type zinc finger DNA-binding family protein	Potri.014G100900; Potri.012G018700; Potri.002G174300; Potri.015G009300
OG0000039	OG0000039_1019	0.00588453	Potra2n4c8808	Bpev01.c0368.g0007.m0001	FUN_019322-T1	PA_chr09_G003783	PS_chr08_G035003	PS_chr06_G024657	GO:0003677; GO:0005634; GO:0006355	DNA binding; nucleus; regulation of transcription, DNA	AT1G28310	NA	NA	Dof-type zinc finger DNA-binding family protein Dof-type zinc finger DNA-binding family protein	Potri.011G055600; Potri.011G054300; Potri.004G046600; Potri.004G046100
OG0000039	OG0000039_1020	0.0133	Potra2n15c28772	Bpev01.c0368.g0007.m0001	FUN_019322-T1	PA_chr09_G003783	PS_chr08_G035003	PS_chr06_G024657	GO:0003677; GO:0005634; GO:0006355	DNA binding; nucleus; regulation of transcription, DNA	AT5G60850	OBP4	OBF binding protein 4	OBF binding protein 4 OBF binding protein 4	Potri.011G054300; Potri.015G048300; Potri.012G063800; Potri.004G046100
OG0000039	OG0000039_1021	0.0200333	Potra2n394s35532	Bpev01.c0368.g0007.m0001	FUN_019322-T1	PA_chr09_G003783	PS_chr08_G035003	PS_chr06_G024657	GO:0003677; GO:0005634; GO:0006355	DNA binding; nucleus; regulation of transcription, DNA	AT5G60850	OBP4	OBF binding protein 4	OBF binding protein 4 OBF binding protein 4	Potri.011G054300; Potri.015G048300; Potri.012G063800; Potri.004G046100
OG0000039	OG0000039_1022	0.0058848	Potra2n4c8808	Bpev01.c0368.g0007.m0001	FUN_032079-T1	PA_chr09_G003783	PS_chr08_G035003	PS_chr06_G024657	GO:0003677; GO:0005634; GO:0006355	DNA binding; nucleus; regulation of transcription, DNA	AT1G28310	NA	NA	Dof-type zinc finger DNA-binding family protein Dof-type zinc finger DNA-binding family protein	Potri.011G055600; Potri.011G054300; Potri.004G046600; Potri.004G046100
OG0000039	OG0000039_1023	0.00606528	Potra2n14c27144	Bpev01.c0368.g0007.m0001	FUN_032079-T1	PA_chr09_G003783	PS_chr08_G035003	PS_chr06_G024657	GO:0003677; GO:0005634; GO:0006355	DNA binding; nucleus; regulation of transcription, DNA	AT3G61850	DAG1	dof affecting germination 1	Dof-type zinc finger DNA-binding family protein Dof-type zinc finger DNA-binding family protein	Potri.014G100900; Potri.012G018700; Potri.002G174300; Potri.015G009300
OG0000039	OG0000039_1024	0.00588362	Potra2n2c4829	Bpev01.c0368.g0007.m0001	FUN_032079-T1	PA_chr09_G003783	PS_chr08_G035003	PS_chr06_G024657	GO:0003677; GO:0005634; GO:0006355	DNA binding; nucleus; regulation of transcription, DNA	AT3G61850	DAG1	dof affecting germination 1	Dof-type zinc finger DNA-binding family protein Dof-type zinc finger DNA-binding family protein	Potri.014G100900; Potri.012G018700; Potri.002G174300; Potri.015G009300
OG0000039	OG0000039_1025	0.00594062	Potra2n203s34938	Bpev01.c0368.g0007.m0001	FUN_032079-T1	PA_chr09_G003783	PS_chr08_G035003	PS_chr06_G024657	GO:0003677; GO:0005634; GO:0006355	DNA binding; nucleus; regulation of transcription, DNA	AT5G60200	TMO6	TARGET OF MONOPTEROS 6	TARGET OF MONOPTEROS 6 TARGET OF MONOPTEROS 6	Potri.005G134200; Potri.010G204800
OG0000039	OG0000039_1029	0.006065	Potra2n14c27144	Bpev01.c0368.g0007.m0001	FUN_013010-T1	PA_chr09_G003783	PS_chr08_G035003	PS_chr06_G024657	GO:0003677; GO:0005634; GO:0006355	DNA binding; nucleus; regulation of transcription, DNA	AT3G61850	DAG1	dof affecting germination 1	Dof-type zinc finger DNA-binding family protein Dof-type zinc finger DNA-binding family protein	Potri.014G100900; Potri.012G018700; Potri.002G174300; Potri.015G009300
OG0000039	OG0000039_1030	0.00588333	Potra2n2c4829	Bpev01.c0368.g0007.m0001	FUN_013010-T1	PA_chr09_G003783	PS_chr08_G035003	PS_chr06_G024657	GO:0003677; GO:0005634; GO:0006355	DNA binding; nucleus; regulation of transcription, DNA	AT3G61850	DAG1	dof affecting germination 1	Dof-type zinc finger DNA-binding family protein Dof-type zinc finger DNA-binding family protein	Potri.014G100900; Potri.012G018700; Potri.002G174300; Potri.015G009300
OG0000039	OG0000039_1032	0.00588452	Potra2n4c8808	Bpev01.c0368.g0007.m0001	FUN_013010-T1	PA_chr09_G003783	PS_chr08_G035003	PS_chr06_G024657	GO:0003677; GO:0005634; GO:0006355	DNA binding; nucleus; regulation of transcription, DNA	AT1G28310	NA	NA	Dof-type zinc finger DNA-binding family protein Dof-type zinc finger DNA-binding family protein	Potri.011G055600; Potri.011G054300; Potri.004G046600; Potri.004G046100
OG0000039	OG0000039_1042	0.000181885	Potra2n14c27144	Bpev01.c0368.g0007.m0001	FUN_019322-T1	PA_chr09_G003783	PS_chr11_G045264	PS_chr06_G024657	GO:0003677; GO:0005634; GO:0006355	DNA binding; nucleus; regulation of transcription, DNA	AT3G61850	DAG1	dof affecting germination 1	Dof-type zinc finger DNA-binding family protein Dof-type zinc finger DNA-binding family protein	Potri.014G100900; Potri.012G018700; Potri.002G174300; Potri.015G009300
OG0000039	OG0000039_1043	2.1806e-07	Potra2n2c4829	Bpev01.c0368.g0007.m0001	FUN_019322-T1	PA_chr09_G003783	PS_chr11_G045264	PS_chr06_G024657	GO:0003677; GO:0005634; GO:0006355	DNA binding; nucleus; regulation of transcription, DNA	AT3G61850	DAG1	dof affecting germination 1	Dof-type zinc finger DNA-binding family protein Dof-type zinc finger DNA-binding family protein	Potri.014G100900; Potri.012G018700; Potri.002G174300; Potri.015G009300
OG0000039	OG0000039_1044	5.72181e-05	Potra2n203s34938	Bpev01.c0368.g0007.m0001	FUN_019322-T1	PA_chr09_G003783	PS_chr11_G045264	PS_chr06_G024657	GO:0003677; GO:0005634; GO:0006355	DNA binding; nucleus; regulation of transcription, DNA	AT5G60200	TMO6	TARGET OF MONOPTEROS 6	TARGET OF MONOPTEROS 6 TARGET OF MONOPTEROS 6	Potri.005G134200; Potri.010G204800
OG0000039	OG0000039_1046	1.40139e-06	Potra2n4c8808	Bpev01.c0368.g0007.m0001	FUN_019322-T1	PA_chr09_G003783	PS_chr11_G045264	PS_chr06_G024657	GO:0003677; GO:0005634; GO:0006355	DNA binding; nucleus; regulation of transcription, DNA	AT1G28310	NA	NA	Dof-type zinc finger DNA-binding family protein Dof-type zinc finger DNA-binding family protein	Potri.011G055600; Potri.011G054300; Potri.004G046600; Potri.004G046100
OG0000039	OG0000039_1047	2.44184e-06	Potra2n4c8808	Bpev01.c0368.g0007.m0001	FUN_032079-T1	PA_chr09_G003783	PS_chr11_G045264	PS_chr06_G024657	GO:0003677; GO:0005634; GO:0006355	DNA binding; nucleus; regulation of transcription, DNA	AT1G28310	NA	NA	Dof-type zinc finger DNA-binding family protein Dof-type zinc finger DNA-binding family protein	Potri.011G055600; Potri.011G054300; Potri.004G046600; Potri.004G046100
OG0000039	OG0000039_1048	0.000182925	Potra2n14c27144	Bpev01.c0368.g0007.m0001	FUN_032079-T1	PA_chr09_G003783	PS_chr11_G045264	PS_chr06_G024657	GO:0003677; GO:0005634; GO:0006355	DNA binding; nucleus; regulation of transcription, DNA	AT3G61850	DAG1	dof affecting germination 1	Dof-type zinc finger DNA-binding family protein Dof-type zinc finger DNA-binding family protein	Potri.014G100900; Potri.012G018700; Potri.002G174300; Potri.015G009300
OG0000039	OG0000039_1049	1.25851e-06	Potra2n2c4829	Bpev01.c0368.g0007.m0001	FUN_032079-T1	PA_chr09_G003783	PS_chr11_G045264	PS_chr06_G024657	GO:0003677; GO:0005634; GO:0006355	DNA binding; nucleus; regulation of transcription, DNA	AT3G61850	DAG1	dof affecting germination 1	Dof-type zinc finger DNA-binding family protein Dof-type zinc finger DNA-binding family protein	Potri.014G100900; Potri.012G018700; Potri.002G174300; Potri.015G009300
OG0000039	OG0000039_1050	5.82585e-05	Potra2n203s34938	Bpev01.c0368.g0007.m0001	FUN_032079-T1	PA_chr09_G003783	PS_chr11_G045264	PS_chr06_G024657	GO:0003677; GO:0005634; GO:0006355	DNA binding; nucleus; regulation of transcription, DNA	AT5G60200	TMO6	TARGET OF MONOPTEROS 6	TARGET OF MONOPTEROS 6 TARGET OF MONOPTEROS 6	Potri.005G134200; Potri.010G204800
OG0000039	OG0000039_1052	0.000181935	Potra2n14c27144	Bpev01.c0368.g0007.m0001	FUN_013010-T1	PA_chr09_G003783	PS_chr11_G045264	PS_chr06_G024657	GO:0003677; GO:0005634; GO:0006355	DNA binding; nucleus; regulation of transcription, DNA	AT3G61850	DAG1	dof affecting germination 1	Dof-type zinc finger DNA-binding family protein Dof-type zinc finger DNA-binding family protein	Potri.014G100900; Potri.012G018700; Potri.002G174300; Potri.015G009300
OG0000039	OG0000039_1053	2.68343e-07	Potra2n2c4829	Bpev01.c0368.g0007.m0001	FUN_013010-T1	PA_chr09_G003783	PS_chr11_G045264	PS_chr06_G024657	GO:0003677; GO:0005634; GO:0006355	DNA binding; nucleus; regulation of transcription, DNA	AT3G61850	DAG1	dof affecting germination 1	Dof-type zinc finger DNA-binding family protein Dof-type zinc finger DNA-binding family protein	Potri.014G100900; Potri.012G018700; Potri.002G174300; Potri.015G009300
OG0000039	OG0000039_1055	1.45167e-06	Potra2n4c8808	Bpev01.c0368.g0007.m0001	FUN_013010-T1	PA_chr09_G003783	PS_chr11_G045264	PS_chr06_G024657	GO:0003677; GO:0005634; GO:0006355	DNA binding; nucleus; regulation of transcription, DNA	AT1G28310	NA	NA	Dof-type zinc finger DNA-binding family protein Dof-type zinc finger DNA-binding family protein	Potri.011G055600; Potri.011G054300; Potri.004G046600; Potri.004G046100
OG0000039	OG0000039_1061	0.00588367	Potra2n14c27144	Bpev01.c0368.g0007.m0001	FUN_019322-T1	PA_chr08_G003418	PS_chr08_G035003	PS_chr06_G024657	GO:0003677; GO:0005634; GO:0006355	DNA binding; nucleus; regulation of transcription, DNA	AT3G61850	DAG1	dof affecting germination 1	Dof-type zinc finger DNA-binding family protein Dof-type zinc finger DNA-binding family protein	Potri.014G100900; Potri.012G018700; Potri.002G174300; Potri.015G009300
OG0000039	OG0000039_1062	0.00588335	Potra2n2c4829	Bpev01.c0368.g0007.m0001	FUN_019322-T1	PA_chr08_G003418	PS_chr08_G035003	PS_chr06_G024657	GO:0003677; GO:0005634; GO:0006355	DNA binding; nucleus; regulation of transcription, DNA	AT3G61850	DAG1	dof affecting germination 1	Dof-type zinc finger DNA-binding family protein Dof-type zinc finger DNA-binding family protein	Potri.014G100900; Potri.012G018700; Potri.002G174300; Potri.015G009300
OG0000039	OG0000039_1063	0.00630168	Potra2n203s34938	Bpev01.c0368.g0007.m0001	FUN_019322-T1	PA_chr08_G003418	PS_chr08_G035003	PS_chr06_G024657	GO:0003677; GO:0005634; GO:0006355	DNA binding; nucleus; regulation of transcription, DNA	AT5G60200	TMO6	TARGET OF MONOPTEROS 6	TARGET OF MONOPTEROS 6 TARGET OF MONOPTEROS 6	Potri.005G134200; Potri.010G204800
OG0000039	OG0000039_1064	0.0221667	Potra2n12c23811	Bpev01.c0368.g0007.m0001	FUN_019322-T1	PA_chr08_G003418	PS_chr08_G035003	PS_chr06_G024657	GO:0003677; GO:0005634; GO:0006355	DNA binding; nucleus; regulation of transcription, DNA	AT3G61850	DAG1	dof affecting germination 1	Dof-type zinc finger DNA-binding family protein Dof-type zinc finger DNA-binding family protein	Potri.014G100900; Potri.012G018700; Potri.002G174300; Potri.015G009300
OG0000039	OG0000039_1065	0.00588453	Potra2n4c8808	Bpev01.c0368.g0007.m0001	FUN_019322-T1	PA_chr08_G003418	PS_chr08_G035003	PS_chr06_G024657	GO:0003677; GO:0005634; GO:0006355	DNA binding; nucleus; regulation of transcription, DNA	AT1G28310	NA	NA	Dof-type zinc finger DNA-binding family protein Dof-type zinc finger DNA-binding family protein	Potri.011G055600; Potri.011G054300; Potri.004G046600; Potri.004G046100
OG0000039	OG0000039_1066	0.0133	Potra2n15c28772	Bpev01.c0368.g0007.m0001	FUN_019322-T1	PA_chr08_G003418	PS_chr08_G035003	PS_chr06_G024657	GO:0003677; GO:0005634; GO:0006355	DNA binding; nucleus; regulation of transcription, DNA	AT5G60850	OBP4	OBF binding protein 4	OBF binding protein 4 OBF binding protein 4	Potri.011G054300; Potri.015G048300; Potri.012G063800; Potri.004G046100
OG0000039	OG0000039_1067	0.0200333	Potra2n394s35532	Bpev01.c0368.g0007.m0001	FUN_019322-T1	PA_chr08_G003418	PS_chr08_G035003	PS_chr06_G024657	GO:0003677; GO:0005634; GO:0006355	DNA binding; nucleus; regulation of transcription, DNA	AT5G60850	OBP4	OBF binding protein 4	OBF binding protein 4 OBF binding protein 4	Potri.011G054300; Potri.015G048300; Potri.012G063800; Potri.004G046100
OG0000039	OG0000039_1068	0.0229167	Potra2n3c8126	Bpev01.c0368.g0007.m0001	FUN_019322-T1	PA_chr08_G003418	PS_chr08_G035003	PS_chr06_G024657	GO:0003677; GO:0005634; GO:0006355	DNA binding; nucleus; regulation of transcription, DNA	AT3G21270	ADOF2; DOF2	DOF zinc finger protein 2	DOF zinc finger protein 2 DOF zinc finger protein 2	Potri.003G034200; Potri.011G047500; Potri.004G038800
OG0000039	OG0000039_1069	0.0058848	Potra2n4c8808	Bpev01.c0368.g0007.m0001	FUN_032079-T1	PA_chr08_G003418	PS_chr08_G035003	PS_chr06_G024657	GO:0003677; GO:0005634; GO:0006355	DNA binding; nucleus; regulation of transcription, DNA	AT1G28310	NA	NA	Dof-type zinc finger DNA-binding family protein Dof-type zinc finger DNA-binding family protein	Potri.011G055600; Potri.011G054300; Potri.004G046600; Potri.004G046100
OG0000039	OG0000039_1070	0.00588395	Potra2n14c27144	Bpev01.c0368.g0007.m0001	FUN_032079-T1	PA_chr08_G003418	PS_chr08_G035003	PS_chr06_G024657	GO:0003677; GO:0005634; GO:0006355	DNA binding; nucleus; regulation of transcription, DNA	AT3G61850	DAG1	dof affecting germination 1	Dof-type zinc finger DNA-binding family protein Dof-type zinc finger DNA-binding family protein	Potri.014G100900; Potri.012G018700; Potri.002G174300; Potri.015G009300
OG0000039	OG0000039_1071	0.00588363	Potra2n2c4829	Bpev01.c0368.g0007.m0001	FUN_032079-T1	PA_chr08_G003418	PS_chr08_G035003	PS_chr06_G024657	GO:0003677; GO:0005634; GO:0006355	DNA binding; nucleus; regulation of transcription, DNA	AT3G61850	DAG1	dof affecting germination 1	Dof-type zinc finger DNA-binding family protein Dof-type zinc finger DNA-binding family protein	Potri.014G100900; Potri.012G018700; Potri.002G174300; Potri.015G009300
OG0000039	OG0000039_1072	0.00630195	Potra2n203s34938	Bpev01.c0368.g0007.m0001	FUN_032079-T1	PA_chr08_G003418	PS_chr08_G035003	PS_chr06_G024657	GO:0003677; GO:0005634; GO:0006355	DNA binding; nucleus; regulation of transcription, DNA	AT5G60200	TMO6	TARGET OF MONOPTEROS 6	TARGET OF MONOPTEROS 6 TARGET OF MONOPTEROS 6	Potri.005G134200; Potri.010G204800
OG0000039	OG0000039_1076	0.022917	Potra2n3c8126	Bpev01.c0368.g0007.m0001	FUN_032079-T1	PA_chr08_G003418	PS_chr08_G035003	PS_chr06_G024657	GO:0003677; GO:0005634; GO:0006355	DNA binding; nucleus; regulation of transcription, DNA	AT3G21270	ADOF2; DOF2	DOF zinc finger protein 2	DOF zinc finger protein 2 DOF zinc finger protein 2	Potri.003G034200; Potri.011G047500; Potri.004G038800
OG0000039	OG0000039_1077	0.00588366	Potra2n14c27144	Bpev01.c0368.g0007.m0001	FUN_013010-T1	PA_chr08_G003418	PS_chr08_G035003	PS_chr06_G024657	GO:0003677; GO:0005634; GO:0006355	DNA binding; nucleus; regulation of transcription, DNA	AT3G61850	DAG1	dof affecting germination 1	Dof-type zinc finger DNA-binding family protein Dof-type zinc finger DNA-binding family protein	Potri.014G100900; Potri.012G018700; Potri.002G174300; Potri.015G009300
OG0000039	OG0000039_1078	0.00588334	Potra2n2c4829	Bpev01.c0368.g0007.m0001	FUN_013010-T1	PA_chr08_G003418	PS_chr08_G035003	PS_chr06_G024657	GO:0003677; GO:0005634; GO:0006355	DNA binding; nucleus; regulation of transcription, DNA	AT3G61850	DAG1	dof affecting germination 1	Dof-type zinc finger DNA-binding family protein Dof-type zinc finger DNA-binding family protein	Potri.014G100900; Potri.012G018700; Potri.002G174300; Potri.015G009300
OG0000039	OG0000039_1080	0.00588452	Potra2n4c8808	Bpev01.c0368.g0007.m0001	FUN_013010-T1	PA_chr08_G003418	PS_chr08_G035003	PS_chr06_G024657	GO:0003677; GO:0005634; GO:0006355	DNA binding; nucleus; regulation of transcription, DNA	AT1G28310	NA	NA	Dof-type zinc finger DNA-binding family protein Dof-type zinc finger DNA-binding family protein	Potri.011G055600; Potri.011G054300; Potri.004G046600; Potri.004G046100
OG0000039	OG0000039_1083	0.0229167	Potra2n3c8126	Bpev01.c0368.g0007.m0001	FUN_013010-T1	PA_chr08_G003418	PS_chr08_G035003	PS_chr06_G024657	GO:0003677; GO:0005634; GO:0006355	DNA binding; nucleus; regulation of transcription, DNA	AT3G21270	ADOF2; DOF2	DOF zinc finger protein 2	DOF zinc finger protein 2 DOF zinc finger protein 2	Potri.003G034200; Potri.011G047500; Potri.004G038800
OG0000039	OG0000039_1092	5.4805e-07	Potra2n14c27144	Bpev01.c0368.g0007.m0001	FUN_019322-T1	PA_chr08_G003418	PS_chr11_G045264	PS_chr06_G024657	GO:0003677; GO:0005634; GO:0006355	DNA binding; nucleus; regulation of transcription, DNA	AT3G61850	DAG1	dof affecting germination 1	Dof-type zinc finger DNA-binding family protein Dof-type zinc finger DNA-binding family protein	Potri.014G100900; Potri.012G018700; Potri.002G174300; Potri.015G009300
OG0000039	OG0000039_1093	2.27824e-07	Potra2n2c4829	Bpev01.c0368.g0007.m0001	FUN_019322-T1	PA_chr08_G003418	PS_chr11_G045264	PS_chr06_G024657	GO:0003677; GO:0005634; GO:0006355	DNA binding; nucleus; regulation of transcription, DNA	AT3G61850	DAG1	dof affecting germination 1	Dof-type zinc finger DNA-binding family protein Dof-type zinc finger DNA-binding family protein	Potri.014G100900; Potri.012G018700; Potri.002G174300; Potri.015G009300
OG0000039	OG0000039_1094	0.000418551	Potra2n203s34938	Bpev01.c0368.g0007.m0001	FUN_019322-T1	PA_chr08_G003418	PS_chr11_G045264	PS_chr06_G024657	GO:0003677; GO:0005634; GO:0006355	DNA binding; nucleus; regulation of transcription, DNA	AT5G60200	TMO6	TARGET OF MONOPTEROS 6	TARGET OF MONOPTEROS 6 TARGET OF MONOPTEROS 6	Potri.005G134200; Potri.010G204800
OG0000039	OG0000039_1095	0.0162836	Potra2n12c23811	Bpev01.c0368.g0007.m0001	FUN_019322-T1	PA_chr08_G003418	PS_chr11_G045264	PS_chr06_G024657	GO:0003677; GO:0005634; GO:0006355	DNA binding; nucleus; regulation of transcription, DNA	AT3G61850	DAG1	dof affecting germination 1	Dof-type zinc finger DNA-binding family protein Dof-type zinc finger DNA-binding family protein	Potri.014G100900; Potri.012G018700; Potri.002G174300; Potri.015G009300
OG0000039	OG0000039_1096	1.40138e-06	Potra2n4c8808	Bpev01.c0368.g0007.m0001	FUN_019322-T1	PA_chr08_G003418	PS_chr11_G045264	PS_chr06_G024657	GO:0003677; GO:0005634; GO:0006355	DNA binding; nucleus; regulation of transcription, DNA	AT1G28310	NA	NA	Dof-type zinc finger DNA-binding family protein Dof-type zinc finger DNA-binding family protein	Potri.011G055600; Potri.011G054300; Potri.004G046600; Potri.004G046100
OG0000039	OG0000039_1097	0.0170336	Potra2n3c8126	Bpev01.c0368.g0007.m0001	FUN_019322-T1	PA_chr08_G003418	PS_chr11_G045264	PS_chr06_G024657	GO:0003677; GO:0005634; GO:0006355	DNA binding; nucleus; regulation of transcription, DNA	AT3G21270	ADOF2; DOF2	DOF zinc finger protein 2	DOF zinc finger protein 2 DOF zinc finger protein 2	Potri.003G034200; Potri.011G047500; Potri.004G038800
OG0000039	OG0000039_1098	2.44183e-06	Potra2n4c8808	Bpev01.c0368.g0007.m0001	FUN_032079-T1	PA_chr08_G003418	PS_chr11_G045264	PS_chr06_G024657	GO:0003677; GO:0005634; GO:0006355	DNA binding; nucleus; regulation of transcription, DNA	AT1G28310	NA	NA	Dof-type zinc finger DNA-binding family protein Dof-type zinc finger DNA-binding family protein	Potri.011G055600; Potri.011G054300; Potri.004G046600; Potri.004G046100
OG0000039	OG0000039_1099	1.5885e-06	Potra2n14c27144	Bpev01.c0368.g0007.m0001	FUN_032079-T1	PA_chr08_G003418	PS_chr11_G045264	PS_chr06_G024657	GO:0003677; GO:0005634; GO:0006355	DNA binding; nucleus; regulation of transcription, DNA	AT3G61850	DAG1	dof affecting germination 1	Dof-type zinc finger DNA-binding family protein Dof-type zinc finger DNA-binding family protein	Potri.014G100900; Potri.012G018700; Potri.002G174300; Potri.015G009300
OG0000039	OG0000039_1100	1.26827e-06	Potra2n2c4829	Bpev01.c0368.g0007.m0001	FUN_032079-T1	PA_chr08_G003418	PS_chr11_G045264	PS_chr06_G024657	GO:0003677; GO:0005634; GO:0006355	DNA binding; nucleus; regulation of transcription, DNA	AT3G61850	DAG1	dof affecting germination 1	Dof-type zinc finger DNA-binding family protein Dof-type zinc finger DNA-binding family protein	Potri.014G100900; Potri.012G018700; Potri.002G174300; Potri.015G009300
OG0000039	OG0000039_1101	0.000419592	Potra2n203s34938	Bpev01.c0368.g0007.m0001	FUN_032079-T1	PA_chr08_G003418	PS_chr11_G045264	PS_chr06_G024657	GO:0003677; GO:0005634; GO:0006355	DNA binding; nucleus; regulation of transcription, DNA	AT5G60200	TMO6	TARGET OF MONOPTEROS 6	TARGET OF MONOPTEROS 6 TARGET OF MONOPTEROS 6	Potri.005G134200; Potri.010G204800
OG0000039	OG0000039_1103	0.0170346	Potra2n3c8126	Bpev01.c0368.g0007.m0001	FUN_032079-T1	PA_chr08_G003418	PS_chr11_G045264	PS_chr06_G024657	GO:0003677; GO:0005634; GO:0006355	DNA binding; nucleus; regulation of transcription, DNA	AT3G21270	ADOF2; DOF2	DOF zinc finger protein 2	DOF zinc finger protein 2 DOF zinc finger protein 2	Potri.003G034200; Potri.011G047500; Potri.004G038800
OG0000039	OG0000039_1104	5.98333e-07	Potra2n14c27144	Bpev01.c0368.g0007.m0001	FUN_013010-T1	PA_chr08_G003418	PS_chr11_G045264	PS_chr06_G024657	GO:0003677; GO:0005634; GO:0006355	DNA binding; nucleus; regulation of transcription, DNA	AT3G61850	DAG1	dof affecting germination 1	Dof-type zinc finger DNA-binding family protein Dof-type zinc finger DNA-binding family protein	Potri.014G100900; Potri.012G018700; Potri.002G174300; Potri.015G009300
OG0000039	OG0000039_1105	2.78107e-07	Potra2n2c4829	Bpev01.c0368.g0007.m0001	FUN_013010-T1	PA_chr08_G003418	PS_chr11_G045264	PS_chr06_G024657	GO:0003677; GO:0005634; GO:0006355	DNA binding; nucleus; regulation of transcription, DNA	AT3G61850	DAG1	dof affecting germination 1	Dof-type zinc finger DNA-binding family protein Dof-type zinc finger DNA-binding family protein	Potri.014G100900; Potri.012G018700; Potri.002G174300; Potri.015G009300
OG0000039	OG0000039_1107	1.45167e-06	Potra2n4c8808	Bpev01.c0368.g0007.m0001	FUN_013010-T1	PA_chr08_G003418	PS_chr11_G045264	PS_chr06_G024657	GO:0003677; GO:0005634; GO:0006355	DNA binding; nucleus; regulation of transcription, DNA	AT1G28310	NA	NA	Dof-type zinc finger DNA-binding family protein Dof-type zinc finger DNA-binding family protein	Potri.011G055600; Potri.011G054300; Potri.004G046600; Potri.004G046100
OG0000039	OG0000039_1108	0.0170336	Potra2n3c8126	Bpev01.c0368.g0007.m0001	FUN_013010-T1	PA_chr08_G003418	PS_chr11_G045264	PS_chr06_G024657	GO:0003677; GO:0005634; GO:0006355	DNA binding; nucleus; regulation of transcription, DNA	AT3G21270	ADOF2; DOF2	DOF zinc finger protein 2	DOF zinc finger protein 2 DOF zinc finger protein 2	Potri.003G034200; Potri.011G047500; Potri.004G038800
OG0000039	OG0000039_1114	0.0164042	Potra2n2c4829	Bpev01.c0368.g0007.m0001	FUN_019322-T1	PA_chr09_G001556	PS_chr08_G035003	PS_chr06_G024657	GO:0003677; GO:0005634; GO:0006355	DNA binding; nucleus; regulation of transcription, DNA	AT3G61850	DAG1	dof affecting germination 1	Dof-type zinc finger DNA-binding family protein Dof-type zinc finger DNA-binding family protein	Potri.014G100900; Potri.012G018700; Potri.002G174300; Potri.015G009300
OG0000039	OG0000039_1115	0.0136092	Potra2n12c23811	Bpev01.c0368.g0007.m0001	FUN_019322-T1	PA_chr09_G001556	PS_chr08_G035003	PS_chr06_G024657	GO:0003677; GO:0005634; GO:0006355	DNA binding; nucleus; regulation of transcription, DNA	AT3G61850	DAG1	dof affecting germination 1	Dof-type zinc finger DNA-binding family protein Dof-type zinc finger DNA-binding family protein	Potri.014G100900; Potri.012G018700; Potri.002G174300; Potri.015G009300
OG0000039	OG0000039_1116	0.00627204	Potra2n4c8808	Bpev01.c0368.g0007.m0001	FUN_019322-T1	PA_chr09_G001556	PS_chr08_G035003	PS_chr06_G024657	GO:0003677; GO:0005634; GO:0006355	DNA binding; nucleus; regulation of transcription, DNA	AT1G28310	NA	NA	Dof-type zinc finger DNA-binding family protein Dof-type zinc finger DNA-binding family protein	Potri.011G055600; Potri.011G054300; Potri.004G046600; Potri.004G046100
OG0000039	OG0000039_1117	0.0215875	Potra2n3c8126	Bpev01.c0368.g0007.m0001	FUN_019322-T1	PA_chr09_G001556	PS_chr08_G035003	PS_chr06_G024657	GO:0003677; GO:0005634; GO:0006355	DNA binding; nucleus; regulation of transcription, DNA	AT3G21270	ADOF2; DOF2	DOF zinc finger protein 2	DOF zinc finger protein 2 DOF zinc finger protein 2	Potri.003G034200; Potri.011G047500; Potri.004G038800
OG0000039	OG0000039_1118	0.0265209	Potra2n394s35532	Bpev01.c0368.g0007.m0001	FUN_019322-T1	PA_chr09_G001556	PS_chr08_G035003	PS_chr06_G024657	GO:0003677; GO:0005634; GO:0006355	DNA binding; nucleus; regulation of transcription, DNA	AT5G60850	OBP4	OBF binding protein 4	OBF binding protein 4 OBF binding protein 4	Potri.011G054300; Potri.015G048300; Potri.012G063800; Potri.004G046100
OG0000039	OG0000039_1119	0.0186042	Potra2n15c28772	Bpev01.c0368.g0007.m0001	FUN_019322-T1	PA_chr09_G001556	PS_chr08_G035003	PS_chr06_G024657	GO:0003677; GO:0005634; GO:0006355	DNA binding; nucleus; regulation of transcription, DNA	AT5G60850	OBP4	OBF binding protein 4	OBF binding protein 4 OBF binding protein 4	Potri.011G054300; Potri.015G048300; Potri.012G063800; Potri.004G046100
OG0000039	OG0000039_1120	0.00627232	Potra2n4c8808	Bpev01.c0368.g0007.m0001	FUN_032079-T1	PA_chr09_G001556	PS_chr08_G035003	PS_chr06_G024657	GO:0003677; GO:0005634; GO:0006355	DNA binding; nucleus; regulation of transcription, DNA	AT1G28310	NA	NA	Dof-type zinc finger DNA-binding family protein Dof-type zinc finger DNA-binding family protein	Potri.011G055600; Potri.011G054300; Potri.004G046600; Potri.004G046100
OG0000039	OG0000039_1121	0.0164045	Potra2n2c4829	Bpev01.c0368.g0007.m0001	FUN_032079-T1	PA_chr09_G001556	PS_chr08_G035003	PS_chr06_G024657	GO:0003677; GO:0005634; GO:0006355	DNA binding; nucleus; regulation of transcription, DNA	AT3G61850	DAG1	dof affecting germination 1	Dof-type zinc finger DNA-binding family protein Dof-type zinc finger DNA-binding family protein	Potri.014G100900; Potri.012G018700; Potri.002G174300; Potri.015G009300
OG0000039	OG0000039_1123	0.0215878	Potra2n3c8126	Bpev01.c0368.g0007.m0001	FUN_032079-T1	PA_chr09_G001556	PS_chr08_G035003	PS_chr06_G024657	GO:0003677; GO:0005634; GO:0006355	DNA binding; nucleus; regulation of transcription, DNA	AT3G21270	ADOF2; DOF2	DOF zinc finger protein 2	DOF zinc finger protein 2 DOF zinc finger protein 2	Potri.003G034200; Potri.011G047500; Potri.004G038800
OG0000039	OG0000039_1125	0.0186045	Potra2n15c28772	Bpev01.c0368.g0007.m0001	FUN_032079-T1	PA_chr09_G001556	PS_chr08_G035003	PS_chr06_G024657	GO:0003677; GO:0005634; GO:0006355	DNA binding; nucleus; regulation of transcription, DNA	AT5G60850	OBP4	OBF binding protein 4	OBF binding protein 4 OBF binding protein 4	Potri.011G054300; Potri.015G048300; Potri.012G063800; Potri.004G046100
OG0000039	OG0000039_1126	0.0164042	Potra2n2c4829	Bpev01.c0368.g0007.m0001	FUN_013010-T1	PA_chr09_G001556	PS_chr08_G035003	PS_chr06_G024657	GO:0003677; GO:0005634; GO:0006355	DNA binding; nucleus; regulation of transcription, DNA	AT3G61850	DAG1	dof affecting germination 1	Dof-type zinc finger DNA-binding family protein Dof-type zinc finger DNA-binding family protein	Potri.014G100900; Potri.012G018700; Potri.002G174300; Potri.015G009300
OG0000039	OG0000039_1127	0.0136092	Potra2n12c23811	Bpev01.c0368.g0007.m0001	FUN_013010-T1	PA_chr09_G001556	PS_chr08_G035003	PS_chr06_G024657	GO:0003677; GO:0005634; GO:0006355	DNA binding; nucleus; regulation of transcription, DNA	AT3G61850	DAG1	dof affecting germination 1	Dof-type zinc finger DNA-binding family protein Dof-type zinc finger DNA-binding family protein	Potri.014G100900; Potri.012G018700; Potri.002G174300; Potri.015G009300
OG0000039	OG0000039_1128	0.00627203	Potra2n4c8808	Bpev01.c0368.g0007.m0001	FUN_013010-T1	PA_chr09_G001556	PS_chr08_G035003	PS_chr06_G024657	GO:0003677; GO:0005634; GO:0006355	DNA binding; nucleus; regulation of transcription, DNA	AT1G28310	NA	NA	Dof-type zinc finger DNA-binding family protein Dof-type zinc finger DNA-binding family protein	Potri.011G055600; Potri.011G054300; Potri.004G046600; Potri.004G046100
OG0000039	OG0000039_1129	0.0215875	Potra2n3c8126	Bpev01.c0368.g0007.m0001	FUN_013010-T1	PA_chr09_G001556	PS_chr08_G035003	PS_chr06_G024657	GO:0003677; GO:0005634; GO:0006355	DNA binding; nucleus; regulation of transcription, DNA	AT3G21270	ADOF2; DOF2	DOF zinc finger protein 2	DOF zinc finger protein 2 DOF zinc finger protein 2	Potri.003G034200; Potri.011G047500; Potri.004G038800
OG0000039	OG0000039_1130	0.0265209	Potra2n394s35532	Bpev01.c0368.g0007.m0001	FUN_013010-T1	PA_chr09_G001556	PS_chr08_G035003	PS_chr06_G024657	GO:0003677; GO:0005634; GO:0006355	DNA binding; nucleus; regulation of transcription, DNA	AT5G60850	OBP4	OBF binding protein 4	OBF binding protein 4 OBF binding protein 4	Potri.011G054300; Potri.015G048300; Potri.012G063800; Potri.004G046100
OG0000039	OG0000039_1131	0.0186042	Potra2n15c28772	Bpev01.c0368.g0007.m0001	FUN_013010-T1	PA_chr09_G001556	PS_chr08_G035003	PS_chr06_G024657	GO:0003677; GO:0005634; GO:0006355	DNA binding; nucleus; regulation of transcription, DNA	AT5G60850	OBP4	OBF binding protein 4	OBF binding protein 4 OBF binding protein 4	Potri.011G054300; Potri.015G048300; Potri.012G063800; Potri.004G046100
OG0000039	OG0000039_1138	0.0202836	Potra2n2c4829	Bpev01.c0368.g0007.m0001	FUN_019322-T1	PA_chr09_G001556	PS_chr11_G045264	PS_chr06_G024657	GO:0003677; GO:0005634; GO:0006355	DNA binding; nucleus; regulation of transcription, DNA	AT3G61850	DAG1	dof affecting germination 1	Dof-type zinc finger DNA-binding family protein Dof-type zinc finger DNA-binding family protein	Potri.014G100900; Potri.012G018700; Potri.002G174300; Potri.015G009300
OG0000039	OG0000039_1139	0.0174886	Potra2n12c23811	Bpev01.c0368.g0007.m0001	FUN_019322-T1	PA_chr09_G001556	PS_chr11_G045264	PS_chr06_G024657	GO:0003677; GO:0005634; GO:0006355	DNA binding; nucleus; regulation of transcription, DNA	AT3G61850	DAG1	dof affecting germination 1	Dof-type zinc finger DNA-binding family protein Dof-type zinc finger DNA-binding family protein	Potri.014G100900; Potri.012G018700; Potri.002G174300; Potri.015G009300
OG0000039	OG0000039_1140	0.0101514	Potra2n4c8808	Bpev01.c0368.g0007.m0001	FUN_019322-T1	PA_chr09_G001556	PS_chr11_G045264	PS_chr06_G024657	GO:0003677; GO:0005634; GO:0006355	DNA binding; nucleus; regulation of transcription, DNA	AT1G28310	NA	NA	Dof-type zinc finger DNA-binding family protein Dof-type zinc finger DNA-binding family protein	Potri.011G055600; Potri.011G054300; Potri.004G046600; Potri.004G046100
OG0000039	OG0000039_1141	0.0132452	Potra2n3c8126	Bpev01.c0368.g0007.m0001	FUN_019322-T1	PA_chr09_G001556	PS_chr11_G045264	PS_chr06_G024657	GO:0003677; GO:0005634; GO:0006355	DNA binding; nucleus; regulation of transcription, DNA	AT3G21270	ADOF2; DOF2	DOF zinc finger protein 2	DOF zinc finger protein 2 DOF zinc finger protein 2	Potri.003G034200; Potri.011G047500; Potri.004G038800
OG0000039	OG0000039_1142	0.0101524	Potra2n4c8808	Bpev01.c0368.g0007.m0001	FUN_032079-T1	PA_chr09_G001556	PS_chr11_G045264	PS_chr06_G024657	GO:0003677; GO:0005634; GO:0006355	DNA binding; nucleus; regulation of transcription, DNA	AT1G28310	NA	NA	Dof-type zinc finger DNA-binding family protein Dof-type zinc finger DNA-binding family protein	Potri.011G055600; Potri.011G054300; Potri.004G046600; Potri.004G046100
OG0000039	OG0000039_1143	0.0202846	Potra2n2c4829	Bpev01.c0368.g0007.m0001	FUN_032079-T1	PA_chr09_G001556	PS_chr11_G045264	PS_chr06_G024657	GO:0003677; GO:0005634; GO:0006355	DNA binding; nucleus; regulation of transcription, DNA	AT3G61850	DAG1	dof affecting germination 1	Dof-type zinc finger DNA-binding family protein Dof-type zinc finger DNA-binding family protein	Potri.014G100900; Potri.012G018700; Potri.002G174300; Potri.015G009300
OG0000039	OG0000039_1146	0.0202836	Potra2n2c4829	Bpev01.c0368.g0007.m0001	FUN_013010-T1	PA_chr09_G001556	PS_chr11_G045264	PS_chr06_G024657	GO:0003677; GO:0005634; GO:0006355	DNA binding; nucleus; regulation of transcription, DNA	AT3G61850	DAG1	dof affecting germination 1	Dof-type zinc finger DNA-binding family protein Dof-type zinc finger DNA-binding family protein	Potri.014G100900; Potri.012G018700; Potri.002G174300; Potri.015G009300
OG0000039	OG0000039_1148	0.0101515	Potra2n4c8808	Bpev01.c0368.g0007.m0001	FUN_013010-T1	PA_chr09_G001556	PS_chr11_G045264	PS_chr06_G024657	GO:0003677; GO:0005634; GO:0006355	DNA binding; nucleus; regulation of transcription, DNA	AT1G28310	NA	NA	Dof-type zinc finger DNA-binding family protein Dof-type zinc finger DNA-binding family protein	Potri.011G055600; Potri.011G054300; Potri.004G046600; Potri.004G046100
OG0000039	OG0000039_1149	0.0132453	Potra2n3c8126	Bpev01.c0368.g0007.m0001	FUN_013010-T1	PA_chr09_G001556	PS_chr11_G045264	PS_chr06_G024657	GO:0003677; GO:0005634; GO:0006355	DNA binding; nucleus; regulation of transcription, DNA	AT3G21270	ADOF2; DOF2	DOF zinc finger protein 2	DOF zinc finger protein 2 DOF zinc finger protein 2	Potri.003G034200; Potri.011G047500; Potri.004G038800
OG0000039	OG0000039_1150	0.0221669	Potra2n2c4829	Bpev01.c0368.g0007.m0001	FUN_013010-T1	PA_chr09_G001556	PS_chr11_G045264	PS_chr09_G038069	GO:0003677; GO:0005634; GO:0006355	DNA binding; nucleus; regulation of transcription, DNA	AT3G61850	DAG1	dof affecting germination 1	Dof-type zinc finger DNA-binding family protein Dof-type zinc finger DNA-binding family protein	Potri.014G100900; Potri.012G018700; Potri.002G174300; Potri.015G009300
OG0000039	OG0000039_1154	0.0202837	Potra2n2c4829	Bpev01.c0368.g0007.m0001	FUN_019322-T1	PA_chr09_G001556	PS_chr11_G045264	PS_chr09_G038069	GO:0003677; GO:0005634; GO:0006355	DNA binding; nucleus; regulation of transcription, DNA	AT3G61850	DAG1	dof affecting germination 1	Dof-type zinc finger DNA-binding family protein Dof-type zinc finger DNA-binding family protein	Potri.014G100900; Potri.012G018700; Potri.002G174300; Potri.015G009300
OG0000039	OG0000039_1155	0.0244387	Potra2n12c23811	Bpev01.c0368.g0007.m0001	FUN_019322-T1	PA_chr09_G001556	PS_chr11_G045264	PS_chr09_G038069	GO:0003677; GO:0005634; GO:0006355	DNA binding; nucleus; regulation of transcription, DNA	AT3G61850	DAG1	dof affecting germination 1	Dof-type zinc finger DNA-binding family protein Dof-type zinc finger DNA-binding family protein	Potri.014G100900; Potri.012G018700; Potri.002G174300; Potri.015G009300
OG0000039	OG0000039_1156	0.0101504	Potra2n4c8808	Bpev01.c0368.g0007.m0001	FUN_019322-T1	PA_chr09_G001556	PS_chr11_G045264	PS_chr09_G038069	GO:0003677; GO:0005634; GO:0006355	DNA binding; nucleus; regulation of transcription, DNA	AT1G28310	NA	NA	Dof-type zinc finger DNA-binding family protein Dof-type zinc finger DNA-binding family protein	Potri.011G055600; Potri.011G054300; Potri.004G046600; Potri.004G046100
OG0000039	OG0000039_1162	0.0018836	Potra2n2c4829	Bpev01.c0368.g0007.m0001	FUN_013010-T1	PA_chr09_G003783	PS_chr11_G045264	PS_chr09_G038069	GO:0003677; GO:0005634; GO:0006355	DNA binding; nucleus; regulation of transcription, DNA	AT3G61850	DAG1	dof affecting germination 1	Dof-type zinc finger DNA-binding family protein Dof-type zinc finger DNA-binding family protein	Potri.014G100900; Potri.012G018700; Potri.002G174300; Potri.015G009300
OG0000039	OG0000039_1165	0.00206527	Potra2n14c27144	Bpev01.c0368.g0007.m0001	FUN_013010-T1	PA_chr09_G003783	PS_chr11_G045264	PS_chr09_G038069	GO:0003677; GO:0005634; GO:0006355	DNA binding; nucleus; regulation of transcription, DNA	AT3G61850	DAG1	dof affecting germination 1	Dof-type zinc finger DNA-binding family protein Dof-type zinc finger DNA-binding family protein	Potri.014G100900; Potri.012G018700; Potri.002G174300; Potri.015G009300
OG0000039	OG0000039_1166	3.65386e-07	Potra2n2c4829	Bpev01.c0368.g0007.m0001	FUN_019322-T1	PA_chr09_G003783	PS_chr11_G045264	PS_chr09_G038069	GO:0003677; GO:0005634; GO:0006355	DNA binding; nucleus; regulation of transcription, DNA	AT3G61850	DAG1	dof affecting germination 1	Dof-type zinc finger DNA-binding family protein Dof-type zinc finger DNA-binding family protein	Potri.014G100900; Potri.012G018700; Potri.002G174300; Potri.015G009300
OG0000039	OG0000039_1168	3.65386e-07	Potra2n4c8808	Bpev01.c0368.g0007.m0001	FUN_019322-T1	PA_chr09_G003783	PS_chr11_G045264	PS_chr09_G038069	GO:0003677; GO:0005634; GO:0006355	DNA binding; nucleus; regulation of transcription, DNA	AT1G28310	NA	NA	Dof-type zinc finger DNA-binding family protein Dof-type zinc finger DNA-binding family protein	Potri.011G055600; Potri.011G054300; Potri.004G046600; Potri.004G046100
OG0000039	OG0000039_1169	5.73889e-05	Potra2n203s34938	Bpev01.c0368.g0007.m0001	FUN_019322-T1	PA_chr09_G003783	PS_chr11_G045264	PS_chr09_G038069	GO:0003677; GO:0005634; GO:0006355	DNA binding; nucleus; regulation of transcription, DNA	AT5G60200	TMO6	TARGET OF MONOPTEROS 6	TARGET OF MONOPTEROS 6 TARGET OF MONOPTEROS 6	Potri.005G134200; Potri.010G204800
OG0000039	OG0000039_1170	0.000182032	Potra2n14c27144	Bpev01.c0368.g0007.m0001	FUN_019322-T1	PA_chr09_G003783	PS_chr11_G045264	PS_chr09_G038069	GO:0003677; GO:0005634; GO:0006355	DNA binding; nucleus; regulation of transcription, DNA	AT3G61850	DAG1	dof affecting germination 1	Dof-type zinc finger DNA-binding family protein Dof-type zinc finger DNA-binding family protein	Potri.014G100900; Potri.012G018700; Potri.002G174300; Potri.015G009300
OG0000039	OG0000039_1174	0.00150598	Potra2n14c27144	Bpev01.c0368.g0007.m0001	FUN_032079-T1	PA_chr09_G003783	PS_chr11_G045264	PS_chr09_G038069	GO:0003677; GO:0005634; GO:0006355	DNA binding; nucleus; regulation of transcription, DNA	AT3G61850	DAG1	dof affecting germination 1	Dof-type zinc finger DNA-binding family protein Dof-type zinc finger DNA-binding family protein	Potri.014G100900; Potri.012G018700; Potri.002G174300; Potri.015G009300
OG0000039	OG0000039_1176	3.7515e-07	Potra2n2c4829	Bpev01.c0368.g0007.m0001	FUN_019322-T1	PA_chr08_G003418	PS_chr11_G045264	PS_chr09_G038069	GO:0003677; GO:0005634; GO:0006355	DNA binding; nucleus; regulation of transcription, DNA	AT3G61850	DAG1	dof affecting germination 1	Dof-type zinc finger DNA-binding family protein Dof-type zinc finger DNA-binding family protein	Potri.014G100900; Potri.012G018700; Potri.002G174300; Potri.015G009300
OG0000039	OG0000039_1177	0.0297004	Potra2n12c23811	Bpev01.c0368.g0007.m0001	FUN_019322-T1	PA_chr08_G003418	PS_chr11_G045264	PS_chr09_G038069	GO:0003677; GO:0005634; GO:0006355	DNA binding; nucleus; regulation of transcription, DNA	AT3G61850	DAG1	dof affecting germination 1	Dof-type zinc finger DNA-binding family protein Dof-type zinc finger DNA-binding family protein	Potri.014G100900; Potri.012G018700; Potri.002G174300; Potri.015G009300
OG0000039	OG0000039_1178	3.65383e-07	Potra2n4c8808	Bpev01.c0368.g0007.m0001	FUN_019322-T1	PA_chr08_G003418	PS_chr11_G045264	PS_chr09_G038069	GO:0003677; GO:0005634; GO:0006355	DNA binding; nucleus; regulation of transcription, DNA	AT1G28310	NA	NA	Dof-type zinc finger DNA-binding family protein Dof-type zinc finger DNA-binding family protein	Potri.011G055600; Potri.011G054300; Potri.004G046600; Potri.004G046100
OG0000039	OG0000039_1179	0.000418722	Potra2n203s34938	Bpev01.c0368.g0007.m0001	FUN_019322-T1	PA_chr08_G003418	PS_chr11_G045264	PS_chr09_G038069	GO:0003677; GO:0005634; GO:0006355	DNA binding; nucleus; regulation of transcription, DNA	AT5G60200	TMO6	TARGET OF MONOPTEROS 6	TARGET OF MONOPTEROS 6 TARGET OF MONOPTEROS 6	Potri.005G134200; Potri.010G204800
OG0000039	OG0000039_1180	6.95466e-07	Potra2n14c27144	Bpev01.c0368.g0007.m0001	FUN_019322-T1	PA_chr08_G003418	PS_chr11_G045264	PS_chr09_G038069	GO:0003677; GO:0005634; GO:0006355	DNA binding; nucleus; regulation of transcription, DNA	AT3G61850	DAG1	dof affecting germination 1	Dof-type zinc finger DNA-binding family protein Dof-type zinc finger DNA-binding family protein	Potri.014G100900; Potri.012G018700; Potri.002G174300; Potri.015G009300
OG0000039	OG0000039_1181	0.0139337	Potra2n3c8126	Bpev01.c0368.g0007.m0001	FUN_019322-T1	PA_chr08_G003418	PS_chr11_G045264	PS_chr09_G038069	GO:0003677; GO:0005634; GO:0006355	DNA binding; nucleus; regulation of transcription, DNA	AT3G21270	ADOF2; DOF2	DOF zinc finger protein 2	DOF zinc finger protein 2 DOF zinc finger protein 2	Potri.003G034200; Potri.011G047500; Potri.004G038800
OG0000039	OG0000039_1185	0.00132464	Potra2n14c27144	Bpev01.c0368.g0007.m0001	FUN_032079-T1	PA_chr08_G003418	PS_chr11_G045264	PS_chr09_G038069	GO:0003677; GO:0005634; GO:0006355	DNA binding; nucleus; regulation of transcription, DNA	AT3G61850	DAG1	dof affecting germination 1	Dof-type zinc finger DNA-binding family protein Dof-type zinc finger DNA-binding family protein	Potri.014G100900; Potri.012G018700; Potri.002G174300; Potri.015G009300
OG0000039	OG0000039_1188	0.00188361	Potra2n2c4829	Bpev01.c0368.g0007.m0001	FUN_013010-T1	PA_chr08_G003418	PS_chr11_G045264	PS_chr09_G038069	GO:0003677; GO:0005634; GO:0006355	DNA binding; nucleus; regulation of transcription, DNA	AT3G61850	DAG1	dof affecting germination 1	Dof-type zinc finger DNA-binding family protein Dof-type zinc finger DNA-binding family protein	Potri.014G100900; Potri.012G018700; Potri.002G174300; Potri.015G009300
OG0000039	OG0000039_1191	0.00188393	Potra2n14c27144	Bpev01.c0368.g0007.m0001	FUN_013010-T1	PA_chr08_G003418	PS_chr11_G045264	PS_chr09_G038069	GO:0003677; GO:0005634; GO:0006355	DNA binding; nucleus; regulation of transcription, DNA	AT3G61850	DAG1	dof affecting germination 1	Dof-type zinc finger DNA-binding family protein Dof-type zinc finger DNA-binding family protein	Potri.014G100900; Potri.012G018700; Potri.002G174300; Potri.015G009300
OG0000039	OG0000039_1193	0.0182875	Potra2n2c4829	Bpev01.c0368.g0007.m0001	FUN_013010-T1	PA_chr09_G001556	PS_chr08_G035003	PS_chr09_G038069	GO:0003677; GO:0005634; GO:0006355	DNA binding; nucleus; regulation of transcription, DNA	AT3G61850	DAG1	dof affecting germination 1	Dof-type zinc finger DNA-binding family protein Dof-type zinc finger DNA-binding family protein	Potri.014G100900; Potri.012G018700; Potri.002G174300; Potri.015G009300
OG0000039	OG0000039_1194	0.0224425	Potra2n12c23811	Bpev01.c0368.g0007.m0001	FUN_013010-T1	PA_chr09_G001556	PS_chr08_G035003	PS_chr09_G038069	GO:0003677; GO:0005634; GO:0006355	DNA binding; nucleus; regulation of transcription, DNA	AT3G61850	DAG1	dof affecting germination 1	Dof-type zinc finger DNA-binding family protein Dof-type zinc finger DNA-binding family protein	Potri.014G100900; Potri.012G018700; Potri.002G174300; Potri.015G009300
OG0000039	OG0000039_1195	0.00815418	Potra2n4c8808	Bpev01.c0368.g0007.m0001	FUN_013010-T1	PA_chr09_G001556	PS_chr08_G035003	PS_chr09_G038069	GO:0003677; GO:0005634; GO:0006355	DNA binding; nucleus; regulation of transcription, DNA	AT1G28310	NA	NA	Dof-type zinc finger DNA-binding family protein Dof-type zinc finger DNA-binding family protein	Potri.011G055600; Potri.011G054300; Potri.004G046600; Potri.004G046100
OG0000039	OG0000039_1196	0.0203771	Potra2n3c8126	Bpev01.c0368.g0007.m0001	FUN_013010-T1	PA_chr09_G001556	PS_chr08_G035003	PS_chr09_G038069	GO:0003677; GO:0005634; GO:0006355	DNA binding; nucleus; regulation of transcription, DNA	AT3G21270	ADOF2; DOF2	DOF zinc finger protein 2	DOF zinc finger protein 2 DOF zinc finger protein 2	Potri.003G034200; Potri.011G047500; Potri.004G038800
OG0000039	OG0000039_1199	0.0164043	Potra2n2c4829	Bpev01.c0368.g0007.m0001	FUN_019322-T1	PA_chr09_G001556	PS_chr08_G035003	PS_chr09_G038069	GO:0003677; GO:0005634; GO:0006355	DNA binding; nucleus; regulation of transcription, DNA	AT3G61850	DAG1	dof affecting germination 1	Dof-type zinc finger DNA-binding family protein Dof-type zinc finger DNA-binding family protein	Potri.014G100900; Potri.012G018700; Potri.002G174300; Potri.015G009300
OG0000039	OG0000039_1200	0.0205593	Potra2n12c23811	Bpev01.c0368.g0007.m0001	FUN_019322-T1	PA_chr09_G001556	PS_chr08_G035003	PS_chr09_G038069	GO:0003677; GO:0005634; GO:0006355	DNA binding; nucleus; regulation of transcription, DNA	AT3G61850	DAG1	dof affecting germination 1	Dof-type zinc finger DNA-binding family protein Dof-type zinc finger DNA-binding family protein	Potri.014G100900; Potri.012G018700; Potri.002G174300; Potri.015G009300
OG0000039	OG0000039_1201	0.00627101	Potra2n4c8808	Bpev01.c0368.g0007.m0001	FUN_019322-T1	PA_chr09_G001556	PS_chr08_G035003	PS_chr09_G038069	GO:0003677; GO:0005634; GO:0006355	DNA binding; nucleus; regulation of transcription, DNA	AT1G28310	NA	NA	Dof-type zinc finger DNA-binding family protein Dof-type zinc finger DNA-binding family protein	Potri.011G055600; Potri.011G054300; Potri.004G046600; Potri.004G046100
OG0000039	OG0000039_1202	0.0184939	Potra2n3c8126	Bpev01.c0368.g0007.m0001	FUN_019322-T1	PA_chr09_G001556	PS_chr08_G035003	PS_chr09_G038069	GO:0003677; GO:0005634; GO:0006355	DNA binding; nucleus; regulation of transcription, DNA	AT3G21270	ADOF2; DOF2	DOF zinc finger protein 2	DOF zinc finger protein 2 DOF zinc finger protein 2	Potri.003G034200; Potri.011G047500; Potri.004G038800
OG0000039	OG0000039_1203	0.0121439	Potra2n15c28772	Bpev01.c0368.g0007.m0001	FUN_019322-T1	PA_chr09_G001556	PS_chr08_G035003	PS_chr09_G038069	GO:0003677; GO:0005634; GO:0006355	DNA binding; nucleus; regulation of transcription, DNA	AT5G60850	OBP4	OBF binding protein 4	OBF binding protein 4 OBF binding protein 4	Potri.011G054300; Potri.015G048300; Potri.012G063800; Potri.004G046100
OG0000039	OG0000039_1204	0.0200606	Potra2n394s35532	Bpev01.c0368.g0007.m0001	FUN_019322-T1	PA_chr09_G001556	PS_chr08_G035003	PS_chr09_G038069	GO:0003677; GO:0005634; GO:0006355	DNA binding; nucleus; regulation of transcription, DNA	AT5G60850	OBP4	OBF binding protein 4	OBF binding protein 4 OBF binding protein 4	Potri.011G054300; Potri.015G048300; Potri.012G063800; Potri.004G046100
OG0000039	OG0000039_1205	0.00589394	Potra2n3c7191	Bpev01.c0368.g0007.m0001	FUN_019322-T1	PA_chr09_G001556	PS_chr08_G035003	PS_chr09_G038069	GO:0003677; GO:0005634; GO:0006355	DNA binding; nucleus; regulation of transcription, DNA	AT4G24060	NA	NA	Dof-type zinc finger DNA-binding family protein Dof-type zinc finger DNA-binding family protein	Potri.003G144500; Potri.001G086400
OG0000039	OG0000039_1206	0.0160375	Potra2n4c8808	Bpev01.c0368.g0007.m0001	FUN_032079-T1	PA_chr09_G001556	PS_chr08_G035003	PS_chr09_G038069	GO:0003677; GO:0005634; GO:0006355	DNA binding; nucleus; regulation of transcription, DNA	AT1G28310	NA	NA	Dof-type zinc finger DNA-binding family protein Dof-type zinc finger DNA-binding family protein	Potri.011G055600; Potri.011G054300; Potri.004G046600; Potri.004G046100
OG0000039	OG0000039_1207	0.0261709	Potra2n2c4829	Bpev01.c0368.g0007.m0001	FUN_032079-T1	PA_chr09_G001556	PS_chr08_G035003	PS_chr09_G038069	GO:0003677; GO:0005634; GO:0006355	DNA binding; nucleus; regulation of transcription, DNA	AT3G61850	DAG1	dof affecting germination 1	Dof-type zinc finger DNA-binding family protein Dof-type zinc finger DNA-binding family protein	Potri.014G100900; Potri.012G018700; Potri.002G174300; Potri.015G009300
OG0000039	OG0000039_1209	0.0188721	Potra2n3c8126	Bpev01.c0368.g0007.m0001	FUN_032079-T1	PA_chr09_G001556	PS_chr08_G035003	PS_chr09_G038069	GO:0003677; GO:0005634; GO:0006355	DNA binding; nucleus; regulation of transcription, DNA	AT3G21270	ADOF2; DOF2	DOF zinc finger protein 2	DOF zinc finger protein 2 DOF zinc finger protein 2	Potri.003G034200; Potri.011G047500; Potri.004G038800
OG0000039	OG0000039_1216	0.0182542	Potra2n2c4829	Bpev01.c0368.g0007.m0001	FUN_026351-T1	PA_chr09_G001556	PS_chr08_G035003	PS_chr09_G038069	GO:0003677; GO:0005634; GO:0006355	DNA binding; nucleus; regulation of transcription, DNA	AT3G61850	DAG1	dof affecting germination 1	Dof-type zinc finger DNA-binding family protein Dof-type zinc finger DNA-binding family protein	Potri.014G100900; Potri.012G018700; Potri.002G174300; Potri.015G009300
OG0000039	OG0000039_1217	0.0224102	Potra2n12c23811	Bpev01.c0368.g0007.m0001	FUN_026351-T1	PA_chr09_G001556	PS_chr08_G035003	PS_chr09_G038069	GO:0003677; GO:0005634; GO:0006355	DNA binding; nucleus; regulation of transcription, DNA	AT3G61850	DAG1	dof affecting germination 1	Dof-type zinc finger DNA-binding family protein Dof-type zinc finger DNA-binding family protein	Potri.014G100900; Potri.012G018700; Potri.002G174300; Potri.015G009300
OG0000039	OG0000039_1218	0.0278105	Potra2n3c8126	Bpev01.c0368.g0007.m0001	FUN_026351-T1	PA_chr09_G001556	PS_chr08_G035003	PS_chr09_G038069	GO:0003677; GO:0005634; GO:0006355	DNA binding; nucleus; regulation of transcription, DNA	AT3G21270	ADOF2; DOF2	DOF zinc finger protein 2	DOF zinc finger protein 2 DOF zinc finger protein 2	Potri.003G034200; Potri.011G047500; Potri.004G038800
OG0000039	OG0000039_1219	0.00776667	Potra2n2c4829	Bpev01.c0368.g0007.m0001	FUN_013010-T1	PA_chr09_G003783	PS_chr08_G035003	PS_chr09_G038069	GO:0003677; GO:0005634; GO:0006355	DNA binding; nucleus; regulation of transcription, DNA	AT3G61850	DAG1	dof affecting germination 1	Dof-type zinc finger DNA-binding family protein Dof-type zinc finger DNA-binding family protein	Potri.014G100900; Potri.012G018700; Potri.002G174300; Potri.015G009300
OG0000039	OG0000039_1221	0.00776667	Potra2n4c8808	Bpev01.c0368.g0007.m0001	FUN_013010-T1	PA_chr09_G003783	PS_chr08_G035003	PS_chr09_G038069	GO:0003677; GO:0005634; GO:0006355	DNA binding; nucleus; regulation of transcription, DNA	AT1G28310	NA	NA	Dof-type zinc finger DNA-binding family protein Dof-type zinc finger DNA-binding family protein	Potri.011G055600; Potri.011G054300; Potri.004G046600; Potri.004G046100
OG0000039	OG0000039_1224	0.00794833	Potra2n14c27144	Bpev01.c0368.g0007.m0001	FUN_013010-T1	PA_chr09_G003783	PS_chr08_G035003	PS_chr09_G038069	GO:0003677; GO:0005634; GO:0006355	DNA binding; nucleus; regulation of transcription, DNA	AT3G61850	DAG1	dof affecting germination 1	Dof-type zinc finger DNA-binding family protein Dof-type zinc finger DNA-binding family protein	Potri.014G100900; Potri.012G018700; Potri.002G174300; Potri.015G009300
OG0000039	OG0000039_1225	0.00588349	Potra2n2c4829	Bpev01.c0368.g0007.m0001	FUN_019322-T1	PA_chr09_G003783	PS_chr08_G035003	PS_chr09_G038069	GO:0003677; GO:0005634; GO:0006355	DNA binding; nucleus; regulation of transcription, DNA	AT3G61850	DAG1	dof affecting germination 1	Dof-type zinc finger DNA-binding family protein Dof-type zinc finger DNA-binding family protein	Potri.014G100900; Potri.012G018700; Potri.002G174300; Potri.015G009300
OG0000039	OG0000039_1226	0.0271002	Potra2n12c23811	Bpev01.c0368.g0007.m0001	FUN_019322-T1	PA_chr09_G003783	PS_chr08_G035003	PS_chr09_G038069	GO:0003677; GO:0005634; GO:0006355	DNA binding; nucleus; regulation of transcription, DNA	AT3G61850	DAG1	dof affecting germination 1	Dof-type zinc finger DNA-binding family protein Dof-type zinc finger DNA-binding family protein	Potri.014G100900; Potri.012G018700; Potri.002G174300; Potri.015G009300
OG0000039	OG0000039_1227	0.00588349	Potra2n4c8808	Bpev01.c0368.g0007.m0001	FUN_019322-T1	PA_chr09_G003783	PS_chr08_G035003	PS_chr09_G038069	GO:0003677; GO:0005634; GO:0006355	DNA binding; nucleus; regulation of transcription, DNA	AT1G28310	NA	NA	Dof-type zinc finger DNA-binding family protein Dof-type zinc finger DNA-binding family protein	Potri.011G055600; Potri.011G054300; Potri.004G046600; Potri.004G046100
OG0000039	OG0000039_1231	0.00606516	Potra2n14c27144	Bpev01.c0368.g0007.m0001	FUN_019322-T1	PA_chr09_G003783	PS_chr08_G035003	PS_chr09_G038069	GO:0003677; GO:0005634; GO:0006355	DNA binding; nucleus; regulation of transcription, DNA	AT3G61850	DAG1	dof affecting germination 1	Dof-type zinc finger DNA-binding family protein Dof-type zinc finger DNA-binding family protein	Potri.014G100900; Potri.012G018700; Potri.002G174300; Potri.015G009300
OG0000039	OG0000039_1232	0.00594052	Potra2n203s34938	Bpev01.c0368.g0007.m0001	FUN_019322-T1	PA_chr09_G003783	PS_chr08_G035003	PS_chr09_G038069	GO:0003677; GO:0005634; GO:0006355	DNA binding; nucleus; regulation of transcription, DNA	AT5G60200	TMO6	TARGET OF MONOPTEROS 6	TARGET OF MONOPTEROS 6 TARGET OF MONOPTEROS 6	Potri.005G134200; Potri.010G204800
OG0000039	OG0000039_1233	0.0117667	Potra2n4c8808	Bpev01.c0368.g0007.m0001	FUN_032079-T1	PA_chr09_G003783	PS_chr08_G035003	PS_chr09_G038069	GO:0003677; GO:0005634; GO:0006355	DNA binding; nucleus; regulation of transcription, DNA	AT1G28310	NA	NA	Dof-type zinc finger DNA-binding family protein Dof-type zinc finger DNA-binding family protein	Potri.011G055600; Potri.011G054300; Potri.004G046600; Potri.004G046100
OG0000039	OG0000039_1234	0.0117667	Potra2n2c4829	Bpev01.c0368.g0007.m0001	FUN_032079-T1	PA_chr09_G003783	PS_chr08_G035003	PS_chr09_G038069	GO:0003677; GO:0005634; GO:0006355	DNA binding; nucleus; regulation of transcription, DNA	AT3G61850	DAG1	dof affecting germination 1	Dof-type zinc finger DNA-binding family protein Dof-type zinc finger DNA-binding family protein	Potri.014G100900; Potri.012G018700; Potri.002G174300; Potri.015G009300
OG0000039	OG0000039_1239	0.0118237	Potra2n203s34938	Bpev01.c0368.g0007.m0001	FUN_032079-T1	PA_chr09_G003783	PS_chr08_G035003	PS_chr09_G038069	GO:0003677; GO:0005634; GO:0006355	DNA binding; nucleus; regulation of transcription, DNA	AT5G60200	TMO6	TARGET OF MONOPTEROS 6	TARGET OF MONOPTEROS 6 TARGET OF MONOPTEROS 6	Potri.005G134200; Potri.010G204800
OG0000039	OG0000039_1240	0.00738834	Potra2n14c27144	Bpev01.c0368.g0007.m0001	FUN_032079-T1	PA_chr09_G003783	PS_chr08_G035003	PS_chr09_G038069	GO:0003677; GO:0005634; GO:0006355	DNA binding; nucleus; regulation of transcription, DNA	AT3G61850	DAG1	dof affecting germination 1	Dof-type zinc finger DNA-binding family protein Dof-type zinc finger DNA-binding family protein	Potri.014G100900; Potri.012G018700; Potri.002G174300; Potri.015G009300
OG0000039	OG0000039_1246	0.0058835	Potra2n2c4829	Bpev01.c0368.g0007.m0001	FUN_019322-T1	PA_chr08_G003418	PS_chr08_G035003	PS_chr09_G038069	GO:0003677; GO:0005634; GO:0006355	DNA binding; nucleus; regulation of transcription, DNA	AT3G61850	DAG1	dof affecting germination 1	Dof-type zinc finger DNA-binding family protein Dof-type zinc finger DNA-binding family protein	Potri.014G100900; Potri.012G018700; Potri.002G174300; Potri.015G009300
OG0000039	OG0000039_1247	0.0355835	Potra2n12c23811	Bpev01.c0368.g0007.m0001	FUN_019322-T1	PA_chr08_G003418	PS_chr08_G035003	PS_chr09_G038069	GO:0003677; GO:0005634; GO:0006355	DNA binding; nucleus; regulation of transcription, DNA	AT3G61850	DAG1	dof affecting germination 1	Dof-type zinc finger DNA-binding family protein Dof-type zinc finger DNA-binding family protein	Potri.014G100900; Potri.012G018700; Potri.002G174300; Potri.015G009300
OG0000039	OG0000039_1248	0.00588349	Potra2n4c8808	Bpev01.c0368.g0007.m0001	FUN_019322-T1	PA_chr08_G003418	PS_chr08_G035003	PS_chr09_G038069	GO:0003677; GO:0005634; GO:0006355	DNA binding; nucleus; regulation of transcription, DNA	AT1G28310	NA	NA	Dof-type zinc finger DNA-binding family protein Dof-type zinc finger DNA-binding family protein	Potri.011G055600; Potri.011G054300; Potri.004G046600; Potri.004G046100
OG0000039	OG0000039_1251	0.00588382	Potra2n14c27144	Bpev01.c0368.g0007.m0001	FUN_019322-T1	PA_chr08_G003418	PS_chr08_G035003	PS_chr09_G038069	GO:0003677; GO:0005634; GO:0006355	DNA binding; nucleus; regulation of transcription, DNA	AT3G61850	DAG1	dof affecting germination 1	Dof-type zinc finger DNA-binding family protein Dof-type zinc finger DNA-binding family protein	Potri.014G100900; Potri.012G018700; Potri.002G174300; Potri.015G009300
OG0000039	OG0000039_1252	0.00630185	Potra2n203s34938	Bpev01.c0368.g0007.m0001	FUN_019322-T1	PA_chr08_G003418	PS_chr08_G035003	PS_chr09_G038069	GO:0003677; GO:0005634; GO:0006355	DNA binding; nucleus; regulation of transcription, DNA	AT5G60200	TMO6	TARGET OF MONOPTEROS 6	TARGET OF MONOPTEROS 6 TARGET OF MONOPTEROS 6	Potri.005G134200; Potri.010G204800
OG0000039	OG0000039_1253	0.0198168	Potra2n3c8126	Bpev01.c0368.g0007.m0001	FUN_019322-T1	PA_chr08_G003418	PS_chr08_G035003	PS_chr09_G038069	GO:0003677; GO:0005634; GO:0006355	DNA binding; nucleus; regulation of transcription, DNA	AT3G21270	ADOF2; DOF2	DOF zinc finger protein 2	DOF zinc finger protein 2 DOF zinc finger protein 2	Potri.003G034200; Potri.011G047500; Potri.004G038800
OG0000039	OG0000039_1254	0.0117667	Potra2n4c8808	Bpev01.c0368.g0007.m0001	FUN_032079-T1	PA_chr08_G003418	PS_chr08_G035003	PS_chr09_G038069	GO:0003677; GO:0005634; GO:0006355	DNA binding; nucleus; regulation of transcription, DNA	AT1G28310	NA	NA	Dof-type zinc finger DNA-binding family protein Dof-type zinc finger DNA-binding family protein	Potri.011G055600; Potri.011G054300; Potri.004G046600; Potri.004G046100
OG0000039	OG0000039_1255	0.0117667	Potra2n2c4829	Bpev01.c0368.g0007.m0001	FUN_032079-T1	PA_chr08_G003418	PS_chr08_G035003	PS_chr09_G038069	GO:0003677; GO:0005634; GO:0006355	DNA binding; nucleus; regulation of transcription, DNA	AT3G61850	DAG1	dof affecting germination 1	Dof-type zinc finger DNA-binding family protein Dof-type zinc finger DNA-binding family protein	Potri.014G100900; Potri.012G018700; Potri.002G174300; Potri.015G009300
OG0000039	OG0000039_1259	0.012185	Potra2n203s34938	Bpev01.c0368.g0007.m0001	FUN_032079-T1	PA_chr08_G003418	PS_chr08_G035003	PS_chr09_G038069	GO:0003677; GO:0005634; GO:0006355	DNA binding; nucleus; regulation of transcription, DNA	AT5G60200	TMO6	TARGET OF MONOPTEROS 6	TARGET OF MONOPTEROS 6 TARGET OF MONOPTEROS 6	Potri.005G134200; Potri.010G204800
OG0000039	OG0000039_1260	0.007207	Potra2n14c27144	Bpev01.c0368.g0007.m0001	FUN_032079-T1	PA_chr08_G003418	PS_chr08_G035003	PS_chr09_G038069	GO:0003677; GO:0005634; GO:0006355	DNA binding; nucleus; regulation of transcription, DNA	AT3G61850	DAG1	dof affecting germination 1	Dof-type zinc finger DNA-binding family protein Dof-type zinc finger DNA-binding family protein	Potri.014G100900; Potri.012G018700; Potri.002G174300; Potri.015G009300
OG0000039	OG0000039_1261	0.020195	Potra2n3c8126	Bpev01.c0368.g0007.m0001	FUN_032079-T1	PA_chr08_G003418	PS_chr08_G035003	PS_chr09_G038069	GO:0003677; GO:0005634; GO:0006355	DNA binding; nucleus; regulation of transcription, DNA	AT3G21270	ADOF2; DOF2	DOF zinc finger protein 2	DOF zinc finger protein 2 DOF zinc finger protein 2	Potri.003G034200; Potri.011G047500; Potri.004G038800
OG0000039	OG0000039_1262	0.00776668	Potra2n2c4829	Bpev01.c0368.g0007.m0001	FUN_013010-T1	PA_chr08_G003418	PS_chr08_G035003	PS_chr09_G038069	GO:0003677; GO:0005634; GO:0006355	DNA binding; nucleus; regulation of transcription, DNA	AT3G61850	DAG1	dof affecting germination 1	Dof-type zinc finger DNA-binding family protein Dof-type zinc finger DNA-binding family protein	Potri.014G100900; Potri.012G018700; Potri.002G174300; Potri.015G009300
OG0000039	OG0000039_1264	0.00776667	Potra2n4c8808	Bpev01.c0368.g0007.m0001	FUN_013010-T1	PA_chr08_G003418	PS_chr08_G035003	PS_chr09_G038069	GO:0003677; GO:0005634; GO:0006355	DNA binding; nucleus; regulation of transcription, DNA	AT1G28310	NA	NA	Dof-type zinc finger DNA-binding family protein Dof-type zinc finger DNA-binding family protein	Potri.011G055600; Potri.011G054300; Potri.004G046600; Potri.004G046100
OG0000039	OG0000039_1267	0.007767	Potra2n14c27144	Bpev01.c0368.g0007.m0001	FUN_013010-T1	PA_chr08_G003418	PS_chr08_G035003	PS_chr09_G038069	GO:0003677; GO:0005634; GO:0006355	DNA binding; nucleus; regulation of transcription, DNA	AT3G61850	DAG1	dof affecting germination 1	Dof-type zinc finger DNA-binding family protein Dof-type zinc finger DNA-binding family protein	Potri.014G100900; Potri.012G018700; Potri.002G174300; Potri.015G009300
OG0000039	OG0000039_1268	0.0217	Potra2n3c8126	Bpev01.c0368.g0007.m0001	FUN_013010-T1	PA_chr08_G003418	PS_chr08_G035003	PS_chr09_G038069	GO:0003677; GO:0005634; GO:0006355	DNA binding; nucleus; regulation of transcription, DNA	AT3G21270	ADOF2; DOF2	DOF zinc finger protein 2	DOF zinc finger protein 2 DOF zinc finger protein 2	Potri.003G034200; Potri.011G047500; Potri.004G038800
OG0000039	OG0000039_1313	0.0236833	Potra2n7c16311	Bpev01.c0027.g0145.m0001	FUN_038468-T1	PA_chr06_sUL004_G000003	PS_chr06_G024657	PS_chr08_G035003	GO:0003677; GO:0005634; GO:0006355	DNA binding; nucleus; regulation of transcription, DNA	AT3G50410	OBP1	OBF binding protein 1	OBF binding protein 1 OBF binding protein 1	Potri.005G131600; Potri.007G036400
OG0000039	OG0000039_1314	0.0219024	Potra2n5c11633	Bpev01.c0027.g0145.m0001	FUN_038468-T1	PA_chr06_sUL004_G000003	PS_chr06_G024657	PS_chr08_G035003	GO:0003677; GO:0005634; GO:0006355	DNA binding; nucleus; regulation of transcription, DNA	AT3G21270	ADOF2; DOF2	DOF zinc finger protein 2	DOF zinc finger protein 2 DOF zinc finger protein 2	Potri.003G034200; Potri.011G047500; Potri.004G038800
OG0000039	OG0000039_1315	0.0283667	Potra2n5c11639	Bpev01.c0027.g0145.m0001	FUN_038468-T1	PA_chr06_sUL004_G000003	PS_chr06_G024657	PS_chr08_G035003	GO:0003677; GO:0005634; GO:0006355	DNA binding; nucleus; regulation of transcription, DNA	AT3G50410	OBP1	OBF binding protein 1	OBF binding protein 1 OBF binding protein 1	Potri.005G131600; Potri.007G036400
OG0000039	OG0000039_1316	0.0219014	Potra2n14c27144	Bpev01.c0027.g0145.m0001	FUN_038468-T1	PA_chr06_sUL004_G000003	PS_chr06_G024657	PS_chr08_G035003	GO:0003677; GO:0005634; GO:0006355	DNA binding; nucleus; regulation of transcription, DNA	AT3G61850	DAG1	dof affecting germination 1	Dof-type zinc finger DNA-binding family protein Dof-type zinc finger DNA-binding family protein	Potri.014G100900; Potri.012G018700; Potri.002G174300; Potri.015G009300
OG0000039	OG0000039_1317	0.0219203	Potra2n2c4829	Bpev01.c0027.g0145.m0001	FUN_038468-T1	PA_chr06_sUL004_G000003	PS_chr06_G024657	PS_chr08_G035003	GO:0003677; GO:0005634; GO:0006355	DNA binding; nucleus; regulation of transcription, DNA	AT3G61850	DAG1	dof affecting germination 1	Dof-type zinc finger DNA-binding family protein Dof-type zinc finger DNA-binding family protein	Potri.014G100900; Potri.012G018700; Potri.002G174300; Potri.015G009300
OG0000039	OG0000039_1318	0.0239167	Potra2n203s34938	Bpev01.c0027.g0145.m0001	FUN_038468-T1	PA_chr06_sUL004_G000003	PS_chr06_G024657	PS_chr08_G035003	GO:0003677; GO:0005634; GO:0006355	DNA binding; nucleus; regulation of transcription, DNA	AT5G60200	TMO6	TARGET OF MONOPTEROS 6	TARGET OF MONOPTEROS 6 TARGET OF MONOPTEROS 6	Potri.005G134200; Potri.010G204800
OG0000039	OG0000039_1319	0.0363333	Potra2n14c26600	Bpev01.c0027.g0145.m0001	FUN_038468-T1	PA_chr06_sUL004_G000003	PS_chr06_G024657	PS_chr08_G035003	GO:0003677; GO:0005634; GO:0006355	DNA binding; nucleus; regulation of transcription, DNA	AT1G47655	NA	NA	Dof-type zinc finger DNA-binding family protein Dof-type zinc finger DNA-binding family protein	Potri.002G129600; Potri.014G036600
OG0000039	OG0000039_1320	0.0351	Potra2n2c5230	Bpev01.c0027.g0145.m0001	FUN_038468-T1	PA_chr06_sUL004_G000003	PS_chr06_G024657	PS_chr08_G035003	GO:0003677; GO:0005634; GO:0006355	DNA binding; nucleus; regulation of transcription, DNA	AT1G47655	NA	NA	Dof-type zinc finger DNA-binding family protein Dof-type zinc finger DNA-binding family protein	Potri.002G129600; Potri.014G036600
OG0000039	OG0000039_1321	0.0351512	Potra2n15c29140	Bpev01.c0027.g0145.m0001	FUN_038468-T1	PA_chr06_sUL004_G000003	PS_chr06_G024657	PS_chr08_G035003	GO:0003677; GO:0005634; GO:0006355	DNA binding; nucleus; regulation of transcription, DNA	AT4G24060	NA	NA	Dof-type zinc finger DNA-binding family protein Dof-type zinc finger DNA-binding family protein	Potri.003G144500; Potri.001G086400
OG0000039	OG0000039_1324	0.0236833	Potra2n7c16311	Bpev01.c0896.g0009.m0001	FUN_038468-T1	PA_chr06_sUL004_G000003	PS_chr06_G024657	PS_chr08_G035003	GO:0003677; GO:0005634; GO:0006355	DNA binding; nucleus; regulation of transcription, DNA	AT3G50410	OBP1	OBF binding protein 1	OBF binding protein 1 OBF binding protein 1	Potri.005G131600; Potri.007G036400
OG0000039	OG0000039_1325	0.0219024	Potra2n5c11633	Bpev01.c0896.g0009.m0001	FUN_038468-T1	PA_chr06_sUL004_G000003	PS_chr06_G024657	PS_chr08_G035003	GO:0003677; GO:0005634; GO:0006355	DNA binding; nucleus; regulation of transcription, DNA	AT3G21270	ADOF2; DOF2	DOF zinc finger protein 2	DOF zinc finger protein 2 DOF zinc finger protein 2	Potri.003G034200; Potri.011G047500; Potri.004G038800
OG0000039	OG0000039_1326	0.0283667	Potra2n5c11639	Bpev01.c0896.g0009.m0001	FUN_038468-T1	PA_chr06_sUL004_G000003	PS_chr06_G024657	PS_chr08_G035003	GO:0003677; GO:0005634; GO:0006355	DNA binding; nucleus; regulation of transcription, DNA	AT3G50410	OBP1	OBF binding protein 1	OBF binding protein 1 OBF binding protein 1	Potri.005G131600; Potri.007G036400
OG0000039	OG0000039_1327	0.0219014	Potra2n14c27144	Bpev01.c0896.g0009.m0001	FUN_038468-T1	PA_chr06_sUL004_G000003	PS_chr06_G024657	PS_chr08_G035003	GO:0003677; GO:0005634; GO:0006355	DNA binding; nucleus; regulation of transcription, DNA	AT3G61850	DAG1	dof affecting germination 1	Dof-type zinc finger DNA-binding family protein Dof-type zinc finger DNA-binding family protein	Potri.014G100900; Potri.012G018700; Potri.002G174300; Potri.015G009300
OG0000039	OG0000039_1328	0.0219203	Potra2n2c4829	Bpev01.c0896.g0009.m0001	FUN_038468-T1	PA_chr06_sUL004_G000003	PS_chr06_G024657	PS_chr08_G035003	GO:0003677; GO:0005634; GO:0006355	DNA binding; nucleus; regulation of transcription, DNA	AT3G61850	DAG1	dof affecting germination 1	Dof-type zinc finger DNA-binding family protein Dof-type zinc finger DNA-binding family protein	Potri.014G100900; Potri.012G018700; Potri.002G174300; Potri.015G009300
OG0000039	OG0000039_1329	0.0239167	Potra2n203s34938	Bpev01.c0896.g0009.m0001	FUN_038468-T1	PA_chr06_sUL004_G000003	PS_chr06_G024657	PS_chr08_G035003	GO:0003677; GO:0005634; GO:0006355	DNA binding; nucleus; regulation of transcription, DNA	AT5G60200	TMO6	TARGET OF MONOPTEROS 6	TARGET OF MONOPTEROS 6 TARGET OF MONOPTEROS 6	Potri.005G134200; Potri.010G204800
OG0000039	OG0000039_1330	0.0363333	Potra2n14c26600	Bpev01.c0896.g0009.m0001	FUN_038468-T1	PA_chr06_sUL004_G000003	PS_chr06_G024657	PS_chr08_G035003	GO:0003677; GO:0005634; GO:0006355	DNA binding; nucleus; regulation of transcription, DNA	AT1G47655	NA	NA	Dof-type zinc finger DNA-binding family protein Dof-type zinc finger DNA-binding family protein	Potri.002G129600; Potri.014G036600
OG0000039	OG0000039_1331	0.0351	Potra2n2c5230	Bpev01.c0896.g0009.m0001	FUN_038468-T1	PA_chr06_sUL004_G000003	PS_chr06_G024657	PS_chr08_G035003	GO:0003677; GO:0005634; GO:0006355	DNA binding; nucleus; regulation of transcription, DNA	AT1G47655	NA	NA	Dof-type zinc finger DNA-binding family protein Dof-type zinc finger DNA-binding family protein	Potri.002G129600; Potri.014G036600
OG0000039	OG0000039_1332	0.0351512	Potra2n15c29140	Bpev01.c0896.g0009.m0001	FUN_038468-T1	PA_chr06_sUL004_G000003	PS_chr06_G024657	PS_chr08_G035003	GO:0003677; GO:0005634; GO:0006355	DNA binding; nucleus; regulation of transcription, DNA	AT4G24060	NA	NA	Dof-type zinc finger DNA-binding family protein Dof-type zinc finger DNA-binding family protein	Potri.003G144500; Potri.001G086400
OG0000039	OG0000039_1334	0.0236833	Potra2n7c16311	Bpev01.c0368.g0008.m0001	FUN_038468-T1	PA_chr06_sUL004_G000003	PS_chr06_G024657	PS_chr08_G035003	GO:0003677; GO:0005634; GO:0006355	DNA binding; nucleus; regulation of transcription, DNA	AT3G50410	OBP1	OBF binding protein 1	OBF binding protein 1 OBF binding protein 1	Potri.005G131600; Potri.007G036400
OG0000039	OG0000039_1335	0.0219024	Potra2n5c11633	Bpev01.c0368.g0008.m0001	FUN_038468-T1	PA_chr06_sUL004_G000003	PS_chr06_G024657	PS_chr08_G035003	GO:0003677; GO:0005634; GO:0006355	DNA binding; nucleus; regulation of transcription, DNA	AT3G21270	ADOF2; DOF2	DOF zinc finger protein 2	DOF zinc finger protein 2 DOF zinc finger protein 2	Potri.003G034200; Potri.011G047500; Potri.004G038800
OG0000039	OG0000039_1336	0.0283667	Potra2n5c11639	Bpev01.c0368.g0008.m0001	FUN_038468-T1	PA_chr06_sUL004_G000003	PS_chr06_G024657	PS_chr08_G035003	GO:0003677; GO:0005634; GO:0006355	DNA binding; nucleus; regulation of transcription, DNA	AT3G50410	OBP1	OBF binding protein 1	OBF binding protein 1 OBF binding protein 1	Potri.005G131600; Potri.007G036400
OG0000039	OG0000039_1337	0.0219014	Potra2n14c27144	Bpev01.c0368.g0008.m0001	FUN_038468-T1	PA_chr06_sUL004_G000003	PS_chr06_G024657	PS_chr08_G035003	GO:0003677; GO:0005634; GO:0006355	DNA binding; nucleus; regulation of transcription, DNA	AT3G61850	DAG1	dof affecting germination 1	Dof-type zinc finger DNA-binding family protein Dof-type zinc finger DNA-binding family protein	Potri.014G100900; Potri.012G018700; Potri.002G174300; Potri.015G009300
OG0000039	OG0000039_1338	0.0219203	Potra2n2c4829	Bpev01.c0368.g0008.m0001	FUN_038468-T1	PA_chr06_sUL004_G000003	PS_chr06_G024657	PS_chr08_G035003	GO:0003677; GO:0005634; GO:0006355	DNA binding; nucleus; regulation of transcription, DNA	AT3G61850	DAG1	dof affecting germination 1	Dof-type zinc finger DNA-binding family protein Dof-type zinc finger DNA-binding family protein	Potri.014G100900; Potri.012G018700; Potri.002G174300; Potri.015G009300
OG0000039	OG0000039_1339	0.0239167	Potra2n203s34938	Bpev01.c0368.g0008.m0001	FUN_038468-T1	PA_chr06_sUL004_G000003	PS_chr06_G024657	PS_chr08_G035003	GO:0003677; GO:0005634; GO:0006355	DNA binding; nucleus; regulation of transcription, DNA	AT5G60200	TMO6	TARGET OF MONOPTEROS 6	TARGET OF MONOPTEROS 6 TARGET OF MONOPTEROS 6	Potri.005G134200; Potri.010G204800
OG0000039	OG0000039_1340	0.0363333	Potra2n14c26600	Bpev01.c0368.g0008.m0001	FUN_038468-T1	PA_chr06_sUL004_G000003	PS_chr06_G024657	PS_chr08_G035003	GO:0003677; GO:0005634; GO:0006355	DNA binding; nucleus; regulation of transcription, DNA	AT1G47655	NA	NA	Dof-type zinc finger DNA-binding family protein Dof-type zinc finger DNA-binding family protein	Potri.002G129600; Potri.014G036600
OG0000039	OG0000039_1341	0.0351	Potra2n2c5230	Bpev01.c0368.g0008.m0001	FUN_038468-T1	PA_chr06_sUL004_G000003	PS_chr06_G024657	PS_chr08_G035003	GO:0003677; GO:0005634; GO:0006355	DNA binding; nucleus; regulation of transcription, DNA	AT1G47655	NA	NA	Dof-type zinc finger DNA-binding family protein Dof-type zinc finger DNA-binding family protein	Potri.002G129600; Potri.014G036600
OG0000039	OG0000039_1342	0.0351512	Potra2n15c29140	Bpev01.c0368.g0008.m0001	FUN_038468-T1	PA_chr06_sUL004_G000003	PS_chr06_G024657	PS_chr08_G035003	GO:0003677; GO:0005634; GO:0006355	DNA binding; nucleus; regulation of transcription, DNA	AT4G24060	NA	NA	Dof-type zinc finger DNA-binding family protein Dof-type zinc finger DNA-binding family protein	Potri.003G144500; Potri.001G086400
OG0000039	OG0000039_1344	0.0104833	Potra2n7c16311	Bpev01.c0015.g0225.m0001	FUN_038468-T1	PA_chr06_sUL004_G000003	PS_chr06_G024657	PS_chr08_G035003	GO:0003677; GO:0005634; GO:0006355	DNA binding; nucleus; regulation of transcription, DNA	AT3G50410	OBP1	OBF binding protein 1	OBF binding protein 1 OBF binding protein 1	Potri.005G131600; Potri.007G036400
OG0000039	OG0000039_1345	0.00870242	Potra2n5c11633	Bpev01.c0015.g0225.m0001	FUN_038468-T1	PA_chr06_sUL004_G000003	PS_chr06_G024657	PS_chr08_G035003	GO:0003677; GO:0005634; GO:0006355	DNA binding; nucleus; regulation of transcription, DNA	AT3G21270	ADOF2; DOF2	DOF zinc finger protein 2	DOF zinc finger protein 2 DOF zinc finger protein 2	Potri.003G034200; Potri.011G047500; Potri.004G038800
OG0000039	OG0000039_1346	0.0151667	Potra2n5c11639	Bpev01.c0015.g0225.m0001	FUN_038468-T1	PA_chr06_sUL004_G000003	PS_chr06_G024657	PS_chr08_G035003	GO:0003677; GO:0005634; GO:0006355	DNA binding; nucleus; regulation of transcription, DNA	AT3G50410	OBP1	OBF binding protein 1	OBF binding protein 1 OBF binding protein 1	Potri.005G131600; Potri.007G036400
OG0000039	OG0000039_1347	0.00870141	Potra2n14c27144	Bpev01.c0015.g0225.m0001	FUN_038468-T1	PA_chr06_sUL004_G000003	PS_chr06_G024657	PS_chr08_G035003	GO:0003677; GO:0005634; GO:0006355	DNA binding; nucleus; regulation of transcription, DNA	AT3G61850	DAG1	dof affecting germination 1	Dof-type zinc finger DNA-binding family protein Dof-type zinc finger DNA-binding family protein	Potri.014G100900; Potri.012G018700; Potri.002G174300; Potri.015G009300
OG0000039	OG0000039_1348	0.00872033	Potra2n2c4829	Bpev01.c0015.g0225.m0001	FUN_038468-T1	PA_chr06_sUL004_G000003	PS_chr06_G024657	PS_chr08_G035003	GO:0003677; GO:0005634; GO:0006355	DNA binding; nucleus; regulation of transcription, DNA	AT3G61850	DAG1	dof affecting germination 1	Dof-type zinc finger DNA-binding family protein Dof-type zinc finger DNA-binding family protein	Potri.014G100900; Potri.012G018700; Potri.002G174300; Potri.015G009300
OG0000039	OG0000039_1349	0.0107167	Potra2n203s34938	Bpev01.c0015.g0225.m0001	FUN_038468-T1	PA_chr06_sUL004_G000003	PS_chr06_G024657	PS_chr08_G035003	GO:0003677; GO:0005634; GO:0006355	DNA binding; nucleus; regulation of transcription, DNA	AT5G60200	TMO6	TARGET OF MONOPTEROS 6	TARGET OF MONOPTEROS 6 TARGET OF MONOPTEROS 6	Potri.005G134200; Potri.010G204800
OG0000039	OG0000039_1350	0.0231333	Potra2n14c26600	Bpev01.c0015.g0225.m0001	FUN_038468-T1	PA_chr06_sUL004_G000003	PS_chr06_G024657	PS_chr08_G035003	GO:0003677; GO:0005634; GO:0006355	DNA binding; nucleus; regulation of transcription, DNA	AT1G47655	NA	NA	Dof-type zinc finger DNA-binding family protein Dof-type zinc finger DNA-binding family protein	Potri.002G129600; Potri.014G036600
OG0000039	OG0000039_1351	0.0219	Potra2n2c5230	Bpev01.c0015.g0225.m0001	FUN_038468-T1	PA_chr06_sUL004_G000003	PS_chr06_G024657	PS_chr08_G035003	GO:0003677; GO:0005634; GO:0006355	DNA binding; nucleus; regulation of transcription, DNA	AT1G47655	NA	NA	Dof-type zinc finger DNA-binding family protein Dof-type zinc finger DNA-binding family protein	Potri.002G129600; Potri.014G036600
OG0000039	OG0000039_1352	0.0219512	Potra2n15c29140	Bpev01.c0015.g0225.m0001	FUN_038468-T1	PA_chr06_sUL004_G000003	PS_chr06_G024657	PS_chr08_G035003	GO:0003677; GO:0005634; GO:0006355	DNA binding; nucleus; regulation of transcription, DNA	AT4G24060	NA	NA	Dof-type zinc finger DNA-binding family protein Dof-type zinc finger DNA-binding family protein	Potri.003G144500; Potri.001G086400
OG0000039	OG0000039_1355	0.0135167	Potra2n7c16311	Bpev01.c0363.g0021.m0001	FUN_038468-T1	PA_chr06_sUL004_G000003	PS_chr06_G024657	PS_chr08_G035003	GO:0003677; GO:0005634; GO:0006355	DNA binding; nucleus; regulation of transcription, DNA	AT3G50410	OBP1	OBF binding protein 1	OBF binding protein 1 OBF binding protein 1	Potri.005G131600; Potri.007G036400
OG0000039	OG0000039_1356	0.0117358	Potra2n5c11633	Bpev01.c0363.g0021.m0001	FUN_038468-T1	PA_chr06_sUL004_G000003	PS_chr06_G024657	PS_chr08_G035003	GO:0003677; GO:0005634; GO:0006355	DNA binding; nucleus; regulation of transcription, DNA	AT3G21270	ADOF2; DOF2	DOF zinc finger protein 2	DOF zinc finger protein 2 DOF zinc finger protein 2	Potri.003G034200; Potri.011G047500; Potri.004G038800
OG0000039	OG0000039_1357	0.0182	Potra2n5c11639	Bpev01.c0363.g0021.m0001	FUN_038468-T1	PA_chr06_sUL004_G000003	PS_chr06_G024657	PS_chr08_G035003	GO:0003677; GO:0005634; GO:0006355	DNA binding; nucleus; regulation of transcription, DNA	AT3G50410	OBP1	OBF binding protein 1	OBF binding protein 1 OBF binding protein 1	Potri.005G131600; Potri.007G036400
OG0000039	OG0000039_1358	0.0117347	Potra2n14c27144	Bpev01.c0363.g0021.m0001	FUN_038468-T1	PA_chr06_sUL004_G000003	PS_chr06_G024657	PS_chr08_G035003	GO:0003677; GO:0005634; GO:0006355	DNA binding; nucleus; regulation of transcription, DNA	AT3G61850	DAG1	dof affecting germination 1	Dof-type zinc finger DNA-binding family protein Dof-type zinc finger DNA-binding family protein	Potri.014G100900; Potri.012G018700; Potri.002G174300; Potri.015G009300
OG0000039	OG0000039_1359	0.0117537	Potra2n2c4829	Bpev01.c0363.g0021.m0001	FUN_038468-T1	PA_chr06_sUL004_G000003	PS_chr06_G024657	PS_chr08_G035003	GO:0003677; GO:0005634; GO:0006355	DNA binding; nucleus; regulation of transcription, DNA	AT3G61850	DAG1	dof affecting germination 1	Dof-type zinc finger DNA-binding family protein Dof-type zinc finger DNA-binding family protein	Potri.014G100900; Potri.012G018700; Potri.002G174300; Potri.015G009300
OG0000039	OG0000039_1360	0.01375	Potra2n203s34938	Bpev01.c0363.g0021.m0001	FUN_038468-T1	PA_chr06_sUL004_G000003	PS_chr06_G024657	PS_chr08_G035003	GO:0003677; GO:0005634; GO:0006355	DNA binding; nucleus; regulation of transcription, DNA	AT5G60200	TMO6	TARGET OF MONOPTEROS 6	TARGET OF MONOPTEROS 6 TARGET OF MONOPTEROS 6	Potri.005G134200; Potri.010G204800
OG0000039	OG0000039_1361	0.0261667	Potra2n14c26600	Bpev01.c0363.g0021.m0001	FUN_038468-T1	PA_chr06_sUL004_G000003	PS_chr06_G024657	PS_chr08_G035003	GO:0003677; GO:0005634; GO:0006355	DNA binding; nucleus; regulation of transcription, DNA	AT1G47655	NA	NA	Dof-type zinc finger DNA-binding family protein Dof-type zinc finger DNA-binding family protein	Potri.002G129600; Potri.014G036600
OG0000039	OG0000039_1362	0.0249333	Potra2n2c5230	Bpev01.c0363.g0021.m0001	FUN_038468-T1	PA_chr06_sUL004_G000003	PS_chr06_G024657	PS_chr08_G035003	GO:0003677; GO:0005634; GO:0006355	DNA binding; nucleus; regulation of transcription, DNA	AT1G47655	NA	NA	Dof-type zinc finger DNA-binding family protein Dof-type zinc finger DNA-binding family protein	Potri.002G129600; Potri.014G036600
OG0000039	OG0000039_1363	0.0249845	Potra2n15c29140	Bpev01.c0363.g0021.m0001	FUN_038468-T1	PA_chr06_sUL004_G000003	PS_chr06_G024657	PS_chr08_G035003	GO:0003677; GO:0005634; GO:0006355	DNA binding; nucleus; regulation of transcription, DNA	AT4G24060	NA	NA	Dof-type zinc finger DNA-binding family protein Dof-type zinc finger DNA-binding family protein	Potri.003G144500; Potri.001G086400
OG0000039	OG0000039_1365	0.0249333	Potra2n3c8126	Bpev01.c0363.g0021.m0001	FUN_038468-T1	PA_chr06_sUL004_G000003	PS_chr06_G024657	PS_chr08_G035003	GO:0003677; GO:0005634; GO:0006355	DNA binding; nucleus; regulation of transcription, DNA	AT3G21270	ADOF2; DOF2	DOF zinc finger protein 2	DOF zinc finger protein 2 DOF zinc finger protein 2	Potri.003G034200; Potri.011G047500; Potri.004G038800
OG0000039	OG0000039_1366	0.0187167	Potra2n7c16311	Bpev01.c0154.g0005.m0001	FUN_038468-T1	PA_chr06_sUL004_G000003	PS_chr06_G024657	PS_chr08_G035003	GO:0003677; GO:0005634; GO:0006355	DNA binding; nucleus; regulation of transcription, DNA	AT3G50410	OBP1	OBF binding protein 1	OBF binding protein 1 OBF binding protein 1	Potri.005G131600; Potri.007G036400
OG0000039	OG0000039_1367	0.0169358	Potra2n5c11633	Bpev01.c0154.g0005.m0001	FUN_038468-T1	PA_chr06_sUL004_G000003	PS_chr06_G024657	PS_chr08_G035003	GO:0003677; GO:0005634; GO:0006355	DNA binding; nucleus; regulation of transcription, DNA	AT3G21270	ADOF2; DOF2	DOF zinc finger protein 2	DOF zinc finger protein 2 DOF zinc finger protein 2	Potri.003G034200; Potri.011G047500; Potri.004G038800
OG0000039	OG0000039_1368	0.0234	Potra2n5c11639	Bpev01.c0154.g0005.m0001	FUN_038468-T1	PA_chr06_sUL004_G000003	PS_chr06_G024657	PS_chr08_G035003	GO:0003677; GO:0005634; GO:0006355	DNA binding; nucleus; regulation of transcription, DNA	AT3G50410	OBP1	OBF binding protein 1	OBF binding protein 1 OBF binding protein 1	Potri.005G131600; Potri.007G036400
OG0000039	OG0000039_1369	0.0169347	Potra2n14c27144	Bpev01.c0154.g0005.m0001	FUN_038468-T1	PA_chr06_sUL004_G000003	PS_chr06_G024657	PS_chr08_G035003	GO:0003677; GO:0005634; GO:0006355	DNA binding; nucleus; regulation of transcription, DNA	AT3G61850	DAG1	dof affecting germination 1	Dof-type zinc finger DNA-binding family protein Dof-type zinc finger DNA-binding family protein	Potri.014G100900; Potri.012G018700; Potri.002G174300; Potri.015G009300
OG0000039	OG0000039_1370	0.0169537	Potra2n2c4829	Bpev01.c0154.g0005.m0001	FUN_038468-T1	PA_chr06_sUL004_G000003	PS_chr06_G024657	PS_chr08_G035003	GO:0003677; GO:0005634; GO:0006355	DNA binding; nucleus; regulation of transcription, DNA	AT3G61850	DAG1	dof affecting germination 1	Dof-type zinc finger DNA-binding family protein Dof-type zinc finger DNA-binding family protein	Potri.014G100900; Potri.012G018700; Potri.002G174300; Potri.015G009300
OG0000039	OG0000039_1371	0.01895	Potra2n203s34938	Bpev01.c0154.g0005.m0001	FUN_038468-T1	PA_chr06_sUL004_G000003	PS_chr06_G024657	PS_chr08_G035003	GO:0003677; GO:0005634; GO:0006355	DNA binding; nucleus; regulation of transcription, DNA	AT5G60200	TMO6	TARGET OF MONOPTEROS 6	TARGET OF MONOPTEROS 6 TARGET OF MONOPTEROS 6	Potri.005G134200; Potri.010G204800
OG0000039	OG0000039_1372	0.0313667	Potra2n14c26600	Bpev01.c0154.g0005.m0001	FUN_038468-T1	PA_chr06_sUL004_G000003	PS_chr06_G024657	PS_chr08_G035003	GO:0003677; GO:0005634; GO:0006355	DNA binding; nucleus; regulation of transcription, DNA	AT1G47655	NA	NA	Dof-type zinc finger DNA-binding family protein Dof-type zinc finger DNA-binding family protein	Potri.002G129600; Potri.014G036600
OG0000039	OG0000039_1373	0.0301333	Potra2n2c5230	Bpev01.c0154.g0005.m0001	FUN_038468-T1	PA_chr06_sUL004_G000003	PS_chr06_G024657	PS_chr08_G035003	GO:0003677; GO:0005634; GO:0006355	DNA binding; nucleus; regulation of transcription, DNA	AT1G47655	NA	NA	Dof-type zinc finger DNA-binding family protein Dof-type zinc finger DNA-binding family protein	Potri.002G129600; Potri.014G036600
OG0000039	OG0000039_1374	0.0301845	Potra2n15c29140	Bpev01.c0154.g0005.m0001	FUN_038468-T1	PA_chr06_sUL004_G000003	PS_chr06_G024657	PS_chr08_G035003	GO:0003677; GO:0005634; GO:0006355	DNA binding; nucleus; regulation of transcription, DNA	AT4G24060	NA	NA	Dof-type zinc finger DNA-binding family protein Dof-type zinc finger DNA-binding family protein	Potri.003G144500; Potri.001G086400
OG0000039	OG0000039_1384	0.0104972	Potra2n7c16311	Bpev01.c0027.g0145.m0001	FUN_011645-T1	PA_chr06_sUL004_G000003	PS_chr06_G024657	PS_chr08_G035003	GO:0003677; GO:0005634; GO:0006355	DNA binding; nucleus; regulation of transcription, DNA	AT3G50410	OBP1	OBF binding protein 1	OBF binding protein 1 OBF binding protein 1	Potri.005G131600; Potri.007G036400
OG0000039	OG0000039_1385	0.00871624	Potra2n5c11633	Bpev01.c0027.g0145.m0001	FUN_011645-T1	PA_chr06_sUL004_G000003	PS_chr06_G024657	PS_chr08_G035003	GO:0003677; GO:0005634; GO:0006355	DNA binding; nucleus; regulation of transcription, DNA	AT3G21270	ADOF2; DOF2	DOF zinc finger protein 2	DOF zinc finger protein 2 DOF zinc finger protein 2	Potri.003G034200; Potri.011G047500; Potri.004G038800
OG0000039	OG0000039_1386	0.0151805	Potra2n5c11639	Bpev01.c0027.g0145.m0001	FUN_011645-T1	PA_chr06_sUL004_G000003	PS_chr06_G024657	PS_chr08_G035003	GO:0003677; GO:0005634; GO:0006355	DNA binding; nucleus; regulation of transcription, DNA	AT3G50410	OBP1	OBF binding protein 1	OBF binding protein 1 OBF binding protein 1	Potri.005G131600; Potri.007G036400
OG0000039	OG0000039_1387	0.00871523	Potra2n14c27144	Bpev01.c0027.g0145.m0001	FUN_011645-T1	PA_chr06_sUL004_G000003	PS_chr06_G024657	PS_chr08_G035003	GO:0003677; GO:0005634; GO:0006355	DNA binding; nucleus; regulation of transcription, DNA	AT3G61850	DAG1	dof affecting germination 1	Dof-type zinc finger DNA-binding family protein Dof-type zinc finger DNA-binding family protein	Potri.014G100900; Potri.012G018700; Potri.002G174300; Potri.015G009300
OG0000039	OG0000039_1388	0.00873415	Potra2n2c4829	Bpev01.c0027.g0145.m0001	FUN_011645-T1	PA_chr06_sUL004_G000003	PS_chr06_G024657	PS_chr08_G035003	GO:0003677; GO:0005634; GO:0006355	DNA binding; nucleus; regulation of transcription, DNA	AT3G61850	DAG1	dof affecting germination 1	Dof-type zinc finger DNA-binding family protein Dof-type zinc finger DNA-binding family protein	Potri.014G100900; Potri.012G018700; Potri.002G174300; Potri.015G009300
OG0000039	OG0000039_1389	0.0107305	Potra2n203s34938	Bpev01.c0027.g0145.m0001	FUN_011645-T1	PA_chr06_sUL004_G000003	PS_chr06_G024657	PS_chr08_G035003	GO:0003677; GO:0005634; GO:0006355	DNA binding; nucleus; regulation of transcription, DNA	AT5G60200	TMO6	TARGET OF MONOPTEROS 6	TARGET OF MONOPTEROS 6 TARGET OF MONOPTEROS 6	Potri.005G134200; Potri.010G204800
OG0000039	OG0000039_1390	0.0231472	Potra2n14c26600	Bpev01.c0027.g0145.m0001	FUN_011645-T1	PA_chr06_sUL004_G000003	PS_chr06_G024657	PS_chr08_G035003	GO:0003677; GO:0005634; GO:0006355	DNA binding; nucleus; regulation of transcription, DNA	AT1G47655	NA	NA	Dof-type zinc finger DNA-binding family protein Dof-type zinc finger DNA-binding family protein	Potri.002G129600; Potri.014G036600
OG0000039	OG0000039_1391	0.0219138	Potra2n2c5230	Bpev01.c0027.g0145.m0001	FUN_011645-T1	PA_chr06_sUL004_G000003	PS_chr06_G024657	PS_chr08_G035003	GO:0003677; GO:0005634; GO:0006355	DNA binding; nucleus; regulation of transcription, DNA	AT1G47655	NA	NA	Dof-type zinc finger DNA-binding family protein Dof-type zinc finger DNA-binding family protein	Potri.002G129600; Potri.014G036600
OG0000039	OG0000039_1392	0.021965	Potra2n15c29140	Bpev01.c0027.g0145.m0001	FUN_011645-T1	PA_chr06_sUL004_G000003	PS_chr06_G024657	PS_chr08_G035003	GO:0003677; GO:0005634; GO:0006355	DNA binding; nucleus; regulation of transcription, DNA	AT4G24060	NA	NA	Dof-type zinc finger DNA-binding family protein Dof-type zinc finger DNA-binding family protein	Potri.003G144500; Potri.001G086400
OG0000039	OG0000039_1394	0.0219138	Potra2n3c8126	Bpev01.c0027.g0145.m0001	FUN_011645-T1	PA_chr06_sUL004_G000003	PS_chr06_G024657	PS_chr08_G035003	GO:0003677; GO:0005634; GO:0006355	DNA binding; nucleus; regulation of transcription, DNA	AT3G21270	ADOF2; DOF2	DOF zinc finger protein 2	DOF zinc finger protein 2 DOF zinc finger protein 2	Potri.003G034200; Potri.011G047500; Potri.004G038800
OG0000039	OG0000039_1395	0.0104972	Potra2n7c16311	Bpev01.c0896.g0009.m0001	FUN_011645-T1	PA_chr06_sUL004_G000003	PS_chr06_G024657	PS_chr08_G035003	GO:0003677; GO:0005634; GO:0006355	DNA binding; nucleus; regulation of transcription, DNA	AT3G50410	OBP1	OBF binding protein 1	OBF binding protein 1 OBF binding protein 1	Potri.005G131600; Potri.007G036400
OG0000039	OG0000039_1396	0.00871624	Potra2n5c11633	Bpev01.c0896.g0009.m0001	FUN_011645-T1	PA_chr06_sUL004_G000003	PS_chr06_G024657	PS_chr08_G035003	GO:0003677; GO:0005634; GO:0006355	DNA binding; nucleus; regulation of transcription, DNA	AT3G21270	ADOF2; DOF2	DOF zinc finger protein 2	DOF zinc finger protein 2 DOF zinc finger protein 2	Potri.003G034200; Potri.011G047500; Potri.004G038800
OG0000039	OG0000039_1397	0.0151805	Potra2n5c11639	Bpev01.c0896.g0009.m0001	FUN_011645-T1	PA_chr06_sUL004_G000003	PS_chr06_G024657	PS_chr08_G035003	GO:0003677; GO:0005634; GO:0006355	DNA binding; nucleus; regulation of transcription, DNA	AT3G50410	OBP1	OBF binding protein 1	OBF binding protein 1 OBF binding protein 1	Potri.005G131600; Potri.007G036400
OG0000039	OG0000039_1398	0.00871523	Potra2n14c27144	Bpev01.c0896.g0009.m0001	FUN_011645-T1	PA_chr06_sUL004_G000003	PS_chr06_G024657	PS_chr08_G035003	GO:0003677; GO:0005634; GO:0006355	DNA binding; nucleus; regulation of transcription, DNA	AT3G61850	DAG1	dof affecting germination 1	Dof-type zinc finger DNA-binding family protein Dof-type zinc finger DNA-binding family protein	Potri.014G100900; Potri.012G018700; Potri.002G174300; Potri.015G009300
OG0000039	OG0000039_1399	0.00873415	Potra2n2c4829	Bpev01.c0896.g0009.m0001	FUN_011645-T1	PA_chr06_sUL004_G000003	PS_chr06_G024657	PS_chr08_G035003	GO:0003677; GO:0005634; GO:0006355	DNA binding; nucleus; regulation of transcription, DNA	AT3G61850	DAG1	dof affecting germination 1	Dof-type zinc finger DNA-binding family protein Dof-type zinc finger DNA-binding family protein	Potri.014G100900; Potri.012G018700; Potri.002G174300; Potri.015G009300
OG0000039	OG0000039_1400	0.0107305	Potra2n203s34938	Bpev01.c0896.g0009.m0001	FUN_011645-T1	PA_chr06_sUL004_G000003	PS_chr06_G024657	PS_chr08_G035003	GO:0003677; GO:0005634; GO:0006355	DNA binding; nucleus; regulation of transcription, DNA	AT5G60200	TMO6	TARGET OF MONOPTEROS 6	TARGET OF MONOPTEROS 6 TARGET OF MONOPTEROS 6	Potri.005G134200; Potri.010G204800
OG0000039	OG0000039_1401	0.0231472	Potra2n14c26600	Bpev01.c0896.g0009.m0001	FUN_011645-T1	PA_chr06_sUL004_G000003	PS_chr06_G024657	PS_chr08_G035003	GO:0003677; GO:0005634; GO:0006355	DNA binding; nucleus; regulation of transcription, DNA	AT1G47655	NA	NA	Dof-type zinc finger DNA-binding family protein Dof-type zinc finger DNA-binding family protein	Potri.002G129600; Potri.014G036600
OG0000039	OG0000039_1402	0.0219138	Potra2n2c5230	Bpev01.c0896.g0009.m0001	FUN_011645-T1	PA_chr06_sUL004_G000003	PS_chr06_G024657	PS_chr08_G035003	GO:0003677; GO:0005634; GO:0006355	DNA binding; nucleus; regulation of transcription, DNA	AT1G47655	NA	NA	Dof-type zinc finger DNA-binding family protein Dof-type zinc finger DNA-binding family protein	Potri.002G129600; Potri.014G036600
OG0000039	OG0000039_1403	0.021965	Potra2n15c29140	Bpev01.c0896.g0009.m0001	FUN_011645-T1	PA_chr06_sUL004_G000003	PS_chr06_G024657	PS_chr08_G035003	GO:0003677; GO:0005634; GO:0006355	DNA binding; nucleus; regulation of transcription, DNA	AT4G24060	NA	NA	Dof-type zinc finger DNA-binding family protein Dof-type zinc finger DNA-binding family protein	Potri.003G144500; Potri.001G086400
OG0000039	OG0000039_1405	0.0104972	Potra2n7c16311	Bpev01.c0368.g0008.m0001	FUN_011645-T1	PA_chr06_sUL004_G000003	PS_chr06_G024657	PS_chr08_G035003	GO:0003677; GO:0005634; GO:0006355	DNA binding; nucleus; regulation of transcription, DNA	AT3G50410	OBP1	OBF binding protein 1	OBF binding protein 1 OBF binding protein 1	Potri.005G131600; Potri.007G036400
OG0000039	OG0000039_1406	0.00871624	Potra2n5c11633	Bpev01.c0368.g0008.m0001	FUN_011645-T1	PA_chr06_sUL004_G000003	PS_chr06_G024657	PS_chr08_G035003	GO:0003677; GO:0005634; GO:0006355	DNA binding; nucleus; regulation of transcription, DNA	AT3G21270	ADOF2; DOF2	DOF zinc finger protein 2	DOF zinc finger protein 2 DOF zinc finger protein 2	Potri.003G034200; Potri.011G047500; Potri.004G038800
OG0000039	OG0000039_1407	0.0151805	Potra2n5c11639	Bpev01.c0368.g0008.m0001	FUN_011645-T1	PA_chr06_sUL004_G000003	PS_chr06_G024657	PS_chr08_G035003	GO:0003677; GO:0005634; GO:0006355	DNA binding; nucleus; regulation of transcription, DNA	AT3G50410	OBP1	OBF binding protein 1	OBF binding protein 1 OBF binding protein 1	Potri.005G131600; Potri.007G036400
OG0000039	OG0000039_1408	0.00871523	Potra2n14c27144	Bpev01.c0368.g0008.m0001	FUN_011645-T1	PA_chr06_sUL004_G000003	PS_chr06_G024657	PS_chr08_G035003	GO:0003677; GO:0005634; GO:0006355	DNA binding; nucleus; regulation of transcription, DNA	AT3G61850	DAG1	dof affecting germination 1	Dof-type zinc finger DNA-binding family protein Dof-type zinc finger DNA-binding family protein	Potri.014G100900; Potri.012G018700; Potri.002G174300; Potri.015G009300
OG0000039	OG0000039_1409	0.00873415	Potra2n2c4829	Bpev01.c0368.g0008.m0001	FUN_011645-T1	PA_chr06_sUL004_G000003	PS_chr06_G024657	PS_chr08_G035003	GO:0003677; GO:0005634; GO:0006355	DNA binding; nucleus; regulation of transcription, DNA	AT3G61850	DAG1	dof affecting germination 1	Dof-type zinc finger DNA-binding family protein Dof-type zinc finger DNA-binding family protein	Potri.014G100900; Potri.012G018700; Potri.002G174300; Potri.015G009300
OG0000039	OG0000039_1410	0.0107305	Potra2n203s34938	Bpev01.c0368.g0008.m0001	FUN_011645-T1	PA_chr06_sUL004_G000003	PS_chr06_G024657	PS_chr08_G035003	GO:0003677; GO:0005634; GO:0006355	DNA binding; nucleus; regulation of transcription, DNA	AT5G60200	TMO6	TARGET OF MONOPTEROS 6	TARGET OF MONOPTEROS 6 TARGET OF MONOPTEROS 6	Potri.005G134200; Potri.010G204800
OG0000039	OG0000039_1411	0.0231472	Potra2n14c26600	Bpev01.c0368.g0008.m0001	FUN_011645-T1	PA_chr06_sUL004_G000003	PS_chr06_G024657	PS_chr08_G035003	GO:0003677; GO:0005634; GO:0006355	DNA binding; nucleus; regulation of transcription, DNA	AT1G47655	NA	NA	Dof-type zinc finger DNA-binding family protein Dof-type zinc finger DNA-binding family protein	Potri.002G129600; Potri.014G036600
OG0000039	OG0000039_1412	0.0219138	Potra2n2c5230	Bpev01.c0368.g0008.m0001	FUN_011645-T1	PA_chr06_sUL004_G000003	PS_chr06_G024657	PS_chr08_G035003	GO:0003677; GO:0005634; GO:0006355	DNA binding; nucleus; regulation of transcription, DNA	AT1G47655	NA	NA	Dof-type zinc finger DNA-binding family protein Dof-type zinc finger DNA-binding family protein	Potri.002G129600; Potri.014G036600
OG0000039	OG0000039_1413	0.021965	Potra2n15c29140	Bpev01.c0368.g0008.m0001	FUN_011645-T1	PA_chr06_sUL004_G000003	PS_chr06_G024657	PS_chr08_G035003	GO:0003677; GO:0005634; GO:0006355	DNA binding; nucleus; regulation of transcription, DNA	AT4G24060	NA	NA	Dof-type zinc finger DNA-binding family protein Dof-type zinc finger DNA-binding family protein	Potri.003G144500; Potri.001G086400
OG0000039	OG0000039_1415	0.0104833	Potra2n7c16311	Bpev01.c0015.g0225.m0001	FUN_011645-T1	PA_chr06_sUL004_G000003	PS_chr06_G024657	PS_chr08_G035003	GO:0003677; GO:0005634; GO:0006355	DNA binding; nucleus; regulation of transcription, DNA	AT3G50410	OBP1	OBF binding protein 1	OBF binding protein 1 OBF binding protein 1	Potri.005G131600; Potri.007G036400
OG0000039	OG0000039_1416	0.00870242	Potra2n5c11633	Bpev01.c0015.g0225.m0001	FUN_011645-T1	PA_chr06_sUL004_G000003	PS_chr06_G024657	PS_chr08_G035003	GO:0003677; GO:0005634; GO:0006355	DNA binding; nucleus; regulation of transcription, DNA	AT3G21270	ADOF2; DOF2	DOF zinc finger protein 2	DOF zinc finger protein 2 DOF zinc finger protein 2	Potri.003G034200; Potri.011G047500; Potri.004G038800
OG0000039	OG0000039_1417	0.0151667	Potra2n5c11639	Bpev01.c0015.g0225.m0001	FUN_011645-T1	PA_chr06_sUL004_G000003	PS_chr06_G024657	PS_chr08_G035003	GO:0003677; GO:0005634; GO:0006355	DNA binding; nucleus; regulation of transcription, DNA	AT3G50410	OBP1	OBF binding protein 1	OBF binding protein 1 OBF binding protein 1	Potri.005G131600; Potri.007G036400
OG0000039	OG0000039_1418	0.00870141	Potra2n14c27144	Bpev01.c0015.g0225.m0001	FUN_011645-T1	PA_chr06_sUL004_G000003	PS_chr06_G024657	PS_chr08_G035003	GO:0003677; GO:0005634; GO:0006355	DNA binding; nucleus; regulation of transcription, DNA	AT3G61850	DAG1	dof affecting germination 1	Dof-type zinc finger DNA-binding family protein Dof-type zinc finger DNA-binding family protein	Potri.014G100900; Potri.012G018700; Potri.002G174300; Potri.015G009300
OG0000039	OG0000039_1419	0.00872034	Potra2n2c4829	Bpev01.c0015.g0225.m0001	FUN_011645-T1	PA_chr06_sUL004_G000003	PS_chr06_G024657	PS_chr08_G035003	GO:0003677; GO:0005634; GO:0006355	DNA binding; nucleus; regulation of transcription, DNA	AT3G61850	DAG1	dof affecting germination 1	Dof-type zinc finger DNA-binding family protein Dof-type zinc finger DNA-binding family protein	Potri.014G100900; Potri.012G018700; Potri.002G174300; Potri.015G009300
OG0000039	OG0000039_1420	0.0107167	Potra2n203s34938	Bpev01.c0015.g0225.m0001	FUN_011645-T1	PA_chr06_sUL004_G000003	PS_chr06_G024657	PS_chr08_G035003	GO:0003677; GO:0005634; GO:0006355	DNA binding; nucleus; regulation of transcription, DNA	AT5G60200	TMO6	TARGET OF MONOPTEROS 6	TARGET OF MONOPTEROS 6 TARGET OF MONOPTEROS 6	Potri.005G134200; Potri.010G204800
OG0000039	OG0000039_1421	0.0231333	Potra2n14c26600	Bpev01.c0015.g0225.m0001	FUN_011645-T1	PA_chr06_sUL004_G000003	PS_chr06_G024657	PS_chr08_G035003	GO:0003677; GO:0005634; GO:0006355	DNA binding; nucleus; regulation of transcription, DNA	AT1G47655	NA	NA	Dof-type zinc finger DNA-binding family protein Dof-type zinc finger DNA-binding family protein	Potri.002G129600; Potri.014G036600
OG0000039	OG0000039_1422	0.0219	Potra2n2c5230	Bpev01.c0015.g0225.m0001	FUN_011645-T1	PA_chr06_sUL004_G000003	PS_chr06_G024657	PS_chr08_G035003	GO:0003677; GO:0005634; GO:0006355	DNA binding; nucleus; regulation of transcription, DNA	AT1G47655	NA	NA	Dof-type zinc finger DNA-binding family protein Dof-type zinc finger DNA-binding family protein	Potri.002G129600; Potri.014G036600
OG0000039	OG0000039_1423	0.0219512	Potra2n15c29140	Bpev01.c0015.g0225.m0001	FUN_011645-T1	PA_chr06_sUL004_G000003	PS_chr06_G024657	PS_chr08_G035003	GO:0003677; GO:0005634; GO:0006355	DNA binding; nucleus; regulation of transcription, DNA	AT4G24060	NA	NA	Dof-type zinc finger DNA-binding family protein Dof-type zinc finger DNA-binding family protein	Potri.003G144500; Potri.001G086400
OG0000039	OG0000039_1425	0.0219	Potra2n3c8126	Bpev01.c0015.g0225.m0001	FUN_011645-T1	PA_chr06_sUL004_G000003	PS_chr06_G024657	PS_chr08_G035003	GO:0003677; GO:0005634; GO:0006355	DNA binding; nucleus; regulation of transcription, DNA	AT3G21270	ADOF2; DOF2	DOF zinc finger protein 2	DOF zinc finger protein 2 DOF zinc finger protein 2	Potri.003G034200; Potri.011G047500; Potri.004G038800
OG0000039	OG0000039_1426	0.0104838	Potra2n7c16311	Bpev01.c0363.g0021.m0001	FUN_011645-T1	PA_chr06_sUL004_G000003	PS_chr06_G024657	PS_chr08_G035003	GO:0003677; GO:0005634; GO:0006355	DNA binding; nucleus; regulation of transcription, DNA	AT3G50410	OBP1	OBF binding protein 1	OBF binding protein 1 OBF binding protein 1	Potri.005G131600; Potri.007G036400
OG0000039	OG0000039_1427	0.00870291	Potra2n5c11633	Bpev01.c0363.g0021.m0001	FUN_011645-T1	PA_chr06_sUL004_G000003	PS_chr06_G024657	PS_chr08_G035003	GO:0003677; GO:0005634; GO:0006355	DNA binding; nucleus; regulation of transcription, DNA	AT3G21270	ADOF2; DOF2	DOF zinc finger protein 2	DOF zinc finger protein 2 DOF zinc finger protein 2	Potri.003G034200; Potri.011G047500; Potri.004G038800
OG0000039	OG0000039_1428	0.0151672	Potra2n5c11639	Bpev01.c0363.g0021.m0001	FUN_011645-T1	PA_chr06_sUL004_G000003	PS_chr06_G024657	PS_chr08_G035003	GO:0003677; GO:0005634; GO:0006355	DNA binding; nucleus; regulation of transcription, DNA	AT3G50410	OBP1	OBF binding protein 1	OBF binding protein 1 OBF binding protein 1	Potri.005G131600; Potri.007G036400
OG0000039	OG0000039_1429	0.0087019	Potra2n14c27144	Bpev01.c0363.g0021.m0001	FUN_011645-T1	PA_chr06_sUL004_G000003	PS_chr06_G024657	PS_chr08_G035003	GO:0003677; GO:0005634; GO:0006355	DNA binding; nucleus; regulation of transcription, DNA	AT3G61850	DAG1	dof affecting germination 1	Dof-type zinc finger DNA-binding family protein Dof-type zinc finger DNA-binding family protein	Potri.014G100900; Potri.012G018700; Potri.002G174300; Potri.015G009300
OG0000039	OG0000039_1430	0.00872083	Potra2n2c4829	Bpev01.c0363.g0021.m0001	FUN_011645-T1	PA_chr06_sUL004_G000003	PS_chr06_G024657	PS_chr08_G035003	GO:0003677; GO:0005634; GO:0006355	DNA binding; nucleus; regulation of transcription, DNA	AT3G61850	DAG1	dof affecting germination 1	Dof-type zinc finger DNA-binding family protein Dof-type zinc finger DNA-binding family protein	Potri.014G100900; Potri.012G018700; Potri.002G174300; Potri.015G009300
OG0000039	OG0000039_1431	0.0107172	Potra2n203s34938	Bpev01.c0363.g0021.m0001	FUN_011645-T1	PA_chr06_sUL004_G000003	PS_chr06_G024657	PS_chr08_G035003	GO:0003677; GO:0005634; GO:0006355	DNA binding; nucleus; regulation of transcription, DNA	AT5G60200	TMO6	TARGET OF MONOPTEROS 6	TARGET OF MONOPTEROS 6 TARGET OF MONOPTEROS 6	Potri.005G134200; Potri.010G204800
OG0000039	OG0000039_1432	0.0231338	Potra2n14c26600	Bpev01.c0363.g0021.m0001	FUN_011645-T1	PA_chr06_sUL004_G000003	PS_chr06_G024657	PS_chr08_G035003	GO:0003677; GO:0005634; GO:0006355	DNA binding; nucleus; regulation of transcription, DNA	AT1G47655	NA	NA	Dof-type zinc finger DNA-binding family protein Dof-type zinc finger DNA-binding family protein	Potri.002G129600; Potri.014G036600
OG0000039	OG0000039_1433	0.0219005	Potra2n2c5230	Bpev01.c0363.g0021.m0001	FUN_011645-T1	PA_chr06_sUL004_G000003	PS_chr06_G024657	PS_chr08_G035003	GO:0003677; GO:0005634; GO:0006355	DNA binding; nucleus; regulation of transcription, DNA	AT1G47655	NA	NA	Dof-type zinc finger DNA-binding family protein Dof-type zinc finger DNA-binding family protein	Potri.002G129600; Potri.014G036600
OG0000039	OG0000039_1434	0.0219517	Potra2n15c29140	Bpev01.c0363.g0021.m0001	FUN_011645-T1	PA_chr06_sUL004_G000003	PS_chr06_G024657	PS_chr08_G035003	GO:0003677; GO:0005634; GO:0006355	DNA binding; nucleus; regulation of transcription, DNA	AT4G24060	NA	NA	Dof-type zinc finger DNA-binding family protein Dof-type zinc finger DNA-binding family protein	Potri.003G144500; Potri.001G086400
OG0000039	OG0000039_1436	0.0219005	Potra2n3c8126	Bpev01.c0363.g0021.m0001	FUN_011645-T1	PA_chr06_sUL004_G000003	PS_chr06_G024657	PS_chr08_G035003	GO:0003677; GO:0005634; GO:0006355	DNA binding; nucleus; regulation of transcription, DNA	AT3G21270	ADOF2; DOF2	DOF zinc finger protein 2	DOF zinc finger protein 2 DOF zinc finger protein 2	Potri.003G034200; Potri.011G047500; Potri.004G038800
OG0000039	OG0000039_1437	0.0187167	Potra2n7c16311	Bpev01.c0154.g0005.m0001	FUN_011645-T1	PA_chr06_sUL004_G000003	PS_chr06_G024657	PS_chr08_G035003	GO:0003677; GO:0005634; GO:0006355	DNA binding; nucleus; regulation of transcription, DNA	AT3G50410	OBP1	OBF binding protein 1	OBF binding protein 1 OBF binding protein 1	Potri.005G131600; Potri.007G036400
OG0000039	OG0000039_1438	0.0169358	Potra2n5c11633	Bpev01.c0154.g0005.m0001	FUN_011645-T1	PA_chr06_sUL004_G000003	PS_chr06_G024657	PS_chr08_G035003	GO:0003677; GO:0005634; GO:0006355	DNA binding; nucleus; regulation of transcription, DNA	AT3G21270	ADOF2; DOF2	DOF zinc finger protein 2	DOF zinc finger protein 2 DOF zinc finger protein 2	Potri.003G034200; Potri.011G047500; Potri.004G038800
OG0000039	OG0000039_1439	0.0234	Potra2n5c11639	Bpev01.c0154.g0005.m0001	FUN_011645-T1	PA_chr06_sUL004_G000003	PS_chr06_G024657	PS_chr08_G035003	GO:0003677; GO:0005634; GO:0006355	DNA binding; nucleus; regulation of transcription, DNA	AT3G50410	OBP1	OBF binding protein 1	OBF binding protein 1 OBF binding protein 1	Potri.005G131600; Potri.007G036400
OG0000039	OG0000039_1440	0.0169347	Potra2n14c27144	Bpev01.c0154.g0005.m0001	FUN_011645-T1	PA_chr06_sUL004_G000003	PS_chr06_G024657	PS_chr08_G035003	GO:0003677; GO:0005634; GO:0006355	DNA binding; nucleus; regulation of transcription, DNA	AT3G61850	DAG1	dof affecting germination 1	Dof-type zinc finger DNA-binding family protein Dof-type zinc finger DNA-binding family protein	Potri.014G100900; Potri.012G018700; Potri.002G174300; Potri.015G009300
OG0000039	OG0000039_1441	0.0169537	Potra2n2c4829	Bpev01.c0154.g0005.m0001	FUN_011645-T1	PA_chr06_sUL004_G000003	PS_chr06_G024657	PS_chr08_G035003	GO:0003677; GO:0005634; GO:0006355	DNA binding; nucleus; regulation of transcription, DNA	AT3G61850	DAG1	dof affecting germination 1	Dof-type zinc finger DNA-binding family protein Dof-type zinc finger DNA-binding family protein	Potri.014G100900; Potri.012G018700; Potri.002G174300; Potri.015G009300
OG0000039	OG0000039_1442	0.01895	Potra2n203s34938	Bpev01.c0154.g0005.m0001	FUN_011645-T1	PA_chr06_sUL004_G000003	PS_chr06_G024657	PS_chr08_G035003	GO:0003677; GO:0005634; GO:0006355	DNA binding; nucleus; regulation of transcription, DNA	AT5G60200	TMO6	TARGET OF MONOPTEROS 6	TARGET OF MONOPTEROS 6 TARGET OF MONOPTEROS 6	Potri.005G134200; Potri.010G204800
OG0000039	OG0000039_1443	0.0313667	Potra2n14c26600	Bpev01.c0154.g0005.m0001	FUN_011645-T1	PA_chr06_sUL004_G000003	PS_chr06_G024657	PS_chr08_G035003	GO:0003677; GO:0005634; GO:0006355	DNA binding; nucleus; regulation of transcription, DNA	AT1G47655	NA	NA	Dof-type zinc finger DNA-binding family protein Dof-type zinc finger DNA-binding family protein	Potri.002G129600; Potri.014G036600
OG0000039	OG0000039_1444	0.0301333	Potra2n2c5230	Bpev01.c0154.g0005.m0001	FUN_011645-T1	PA_chr06_sUL004_G000003	PS_chr06_G024657	PS_chr08_G035003	GO:0003677; GO:0005634; GO:0006355	DNA binding; nucleus; regulation of transcription, DNA	AT1G47655	NA	NA	Dof-type zinc finger DNA-binding family protein Dof-type zinc finger DNA-binding family protein	Potri.002G129600; Potri.014G036600
OG0000039	OG0000039_1445	0.0301845	Potra2n15c29140	Bpev01.c0154.g0005.m0001	FUN_011645-T1	PA_chr06_sUL004_G000003	PS_chr06_G024657	PS_chr08_G035003	GO:0003677; GO:0005634; GO:0006355	DNA binding; nucleus; regulation of transcription, DNA	AT4G24060	NA	NA	Dof-type zinc finger DNA-binding family protein Dof-type zinc finger DNA-binding family protein	Potri.003G144500; Potri.001G086400
OG0000039	OG0000039_1447	0.0256638	Potra2n7c16311	Bpev01.c1810.g0002.m0001	FUN_011645-T1	PA_chr06_sUL004_G000003	PS_chr06_G024657	PS_chr08_G035003	GO:0003677; GO:0005634; GO:0006355	DNA binding; nucleus; regulation of transcription, DNA	AT3G50410	OBP1	OBF binding protein 1	OBF binding protein 1 OBF binding protein 1	Potri.005G131600; Potri.007G036400
OG0000039	OG0000039_1448	0.0238829	Potra2n5c11633	Bpev01.c1810.g0002.m0001	FUN_011645-T1	PA_chr06_sUL004_G000003	PS_chr06_G024657	PS_chr08_G035003	GO:0003677; GO:0005634; GO:0006355	DNA binding; nucleus; regulation of transcription, DNA	AT3G21270	ADOF2; DOF2	DOF zinc finger protein 2	DOF zinc finger protein 2 DOF zinc finger protein 2	Potri.003G034200; Potri.011G047500; Potri.004G038800
OG0000039	OG0000039_1449	0.0239008	Potra2n2c4829	Bpev01.c1810.g0002.m0001	FUN_011645-T1	PA_chr06_sUL004_G000003	PS_chr06_G024657	PS_chr08_G035003	GO:0003677; GO:0005634; GO:0006355	DNA binding; nucleus; regulation of transcription, DNA	AT3G61850	DAG1	dof affecting germination 1	Dof-type zinc finger DNA-binding family protein Dof-type zinc finger DNA-binding family protein	Potri.014G100900; Potri.012G018700; Potri.002G174300; Potri.015G009300
OG0000039	OG0000039_1450	0.0383138	Potra2n14c26600	Bpev01.c1810.g0002.m0001	FUN_011645-T1	PA_chr06_sUL004_G000003	PS_chr06_G024657	PS_chr08_G035003	GO:0003677; GO:0005634; GO:0006355	DNA binding; nucleus; regulation of transcription, DNA	AT1G47655	NA	NA	Dof-type zinc finger DNA-binding family protein Dof-type zinc finger DNA-binding family protein	Potri.002G129600; Potri.014G036600
OG0000039	OG0000039_1451	0.0370805	Potra2n2c5230	Bpev01.c1810.g0002.m0001	FUN_011645-T1	PA_chr06_sUL004_G000003	PS_chr06_G024657	PS_chr08_G035003	GO:0003677; GO:0005634; GO:0006355	DNA binding; nucleus; regulation of transcription, DNA	AT1G47655	NA	NA	Dof-type zinc finger DNA-binding family protein Dof-type zinc finger DNA-binding family protein	Potri.002G129600; Potri.014G036600
OG0000039	OG0000039_1452	0.0371317	Potra2n15c29140	Bpev01.c1810.g0002.m0001	FUN_011645-T1	PA_chr06_sUL004_G000003	PS_chr06_G024657	PS_chr08_G035003	GO:0003677; GO:0005634; GO:0006355	DNA binding; nucleus; regulation of transcription, DNA	AT4G24060	NA	NA	Dof-type zinc finger DNA-binding family protein Dof-type zinc finger DNA-binding family protein	Potri.003G144500; Potri.001G086400
OG0000039	OG0000039_1455	0.0272667	Potra2n7c16311	Bpev01.c0027.g0145.m0001	FUN_021335-T1	PA_chr06_sUL004_G000003	PS_chr06_G024657	PS_chr08_G035003	GO:0003677; GO:0005634; GO:0006355	DNA binding; nucleus; regulation of transcription, DNA	AT3G50410	OBP1	OBF binding protein 1	OBF binding protein 1 OBF binding protein 1	Potri.005G131600; Potri.007G036400
OG0000039	OG0000039_1456	0.0254886	Potra2n5c11633	Bpev01.c0027.g0145.m0001	FUN_021335-T1	PA_chr06_sUL004_G000003	PS_chr06_G024657	PS_chr08_G035003	GO:0003677; GO:0005634; GO:0006355	DNA binding; nucleus; regulation of transcription, DNA	AT3G21270	ADOF2; DOF2	DOF zinc finger protein 2	DOF zinc finger protein 2 DOF zinc finger protein 2	Potri.003G034200; Potri.011G047500; Potri.004G038800
OG0000039	OG0000039_1457	0.03195	Potra2n5c11639	Bpev01.c0027.g0145.m0001	FUN_021335-T1	PA_chr06_sUL004_G000003	PS_chr06_G024657	PS_chr08_G035003	GO:0003677; GO:0005634; GO:0006355	DNA binding; nucleus; regulation of transcription, DNA	AT3G50410	OBP1	OBF binding protein 1	OBF binding protein 1 OBF binding protein 1	Potri.005G131600; Potri.007G036400
OG0000039	OG0000039_1458	0.0254847	Potra2n14c27144	Bpev01.c0027.g0145.m0001	FUN_021335-T1	PA_chr06_sUL004_G000003	PS_chr06_G024657	PS_chr08_G035003	GO:0003677; GO:0005634; GO:0006355	DNA binding; nucleus; regulation of transcription, DNA	AT3G61850	DAG1	dof affecting germination 1	Dof-type zinc finger DNA-binding family protein Dof-type zinc finger DNA-binding family protein	Potri.014G100900; Potri.012G018700; Potri.002G174300; Potri.015G009300
OG0000039	OG0000039_1459	0.0255915	Potra2n2c4829	Bpev01.c0027.g0145.m0001	FUN_021335-T1	PA_chr06_sUL004_G000003	PS_chr06_G024657	PS_chr08_G035003	GO:0003677; GO:0005634; GO:0006355	DNA binding; nucleus; regulation of transcription, DNA	AT3G61850	DAG1	dof affecting germination 1	Dof-type zinc finger DNA-binding family protein Dof-type zinc finger DNA-binding family protein	Potri.014G100900; Potri.012G018700; Potri.002G174300; Potri.015G009300
OG0000039	OG0000039_1460	0.0275	Potra2n203s34938	Bpev01.c0027.g0145.m0001	FUN_021335-T1	PA_chr06_sUL004_G000003	PS_chr06_G024657	PS_chr08_G035003	GO:0003677; GO:0005634; GO:0006355	DNA binding; nucleus; regulation of transcription, DNA	AT5G60200	TMO6	TARGET OF MONOPTEROS 6	TARGET OF MONOPTEROS 6 TARGET OF MONOPTEROS 6	Potri.005G134200; Potri.010G204800
OG0000039	OG0000039_1461	0.0399167	Potra2n14c26600	Bpev01.c0027.g0145.m0001	FUN_021335-T1	PA_chr06_sUL004_G000003	PS_chr06_G024657	PS_chr08_G035003	GO:0003677; GO:0005634; GO:0006355	DNA binding; nucleus; regulation of transcription, DNA	AT1G47655	NA	NA	Dof-type zinc finger DNA-binding family protein Dof-type zinc finger DNA-binding family protein	Potri.002G129600; Potri.014G036600
OG0000039	OG0000039_1463	0.0236833	Potra2n7c16311	Bpev01.c0896.g0009.m0001	FUN_021335-T1	PA_chr06_sUL004_G000003	PS_chr06_G024657	PS_chr08_G035003	GO:0003677; GO:0005634; GO:0006355	DNA binding; nucleus; regulation of transcription, DNA	AT3G50410	OBP1	OBF binding protein 1	OBF binding protein 1 OBF binding protein 1	Potri.005G131600; Potri.007G036400
OG0000039	OG0000039_1464	0.0219053	Potra2n5c11633	Bpev01.c0896.g0009.m0001	FUN_021335-T1	PA_chr06_sUL004_G000003	PS_chr06_G024657	PS_chr08_G035003	GO:0003677; GO:0005634; GO:0006355	DNA binding; nucleus; regulation of transcription, DNA	AT3G21270	ADOF2; DOF2	DOF zinc finger protein 2	DOF zinc finger protein 2 DOF zinc finger protein 2	Potri.003G034200; Potri.011G047500; Potri.004G038800
OG0000039	OG0000039_1465	0.0283667	Potra2n5c11639	Bpev01.c0896.g0009.m0001	FUN_021335-T1	PA_chr06_sUL004_G000003	PS_chr06_G024657	PS_chr08_G035003	GO:0003677; GO:0005634; GO:0006355	DNA binding; nucleus; regulation of transcription, DNA	AT3G50410	OBP1	OBF binding protein 1	OBF binding protein 1 OBF binding protein 1	Potri.005G131600; Potri.007G036400
OG0000039	OG0000039_1466	0.0219014	Potra2n14c27144	Bpev01.c0896.g0009.m0001	FUN_021335-T1	PA_chr06_sUL004_G000003	PS_chr06_G024657	PS_chr08_G035003	GO:0003677; GO:0005634; GO:0006355	DNA binding; nucleus; regulation of transcription, DNA	AT3G61850	DAG1	dof affecting germination 1	Dof-type zinc finger DNA-binding family protein Dof-type zinc finger DNA-binding family protein	Potri.014G100900; Potri.012G018700; Potri.002G174300; Potri.015G009300
OG0000039	OG0000039_1467	0.0220082	Potra2n2c4829	Bpev01.c0896.g0009.m0001	FUN_021335-T1	PA_chr06_sUL004_G000003	PS_chr06_G024657	PS_chr08_G035003	GO:0003677; GO:0005634; GO:0006355	DNA binding; nucleus; regulation of transcription, DNA	AT3G61850	DAG1	dof affecting germination 1	Dof-type zinc finger DNA-binding family protein Dof-type zinc finger DNA-binding family protein	Potri.014G100900; Potri.012G018700; Potri.002G174300; Potri.015G009300
OG0000039	OG0000039_1468	0.0239167	Potra2n203s34938	Bpev01.c0896.g0009.m0001	FUN_021335-T1	PA_chr06_sUL004_G000003	PS_chr06_G024657	PS_chr08_G035003	GO:0003677; GO:0005634; GO:0006355	DNA binding; nucleus; regulation of transcription, DNA	AT5G60200	TMO6	TARGET OF MONOPTEROS 6	TARGET OF MONOPTEROS 6 TARGET OF MONOPTEROS 6	Potri.005G134200; Potri.010G204800
OG0000039	OG0000039_1469	0.0363333	Potra2n14c26600	Bpev01.c0896.g0009.m0001	FUN_021335-T1	PA_chr06_sUL004_G000003	PS_chr06_G024657	PS_chr08_G035003	GO:0003677; GO:0005634; GO:0006355	DNA binding; nucleus; regulation of transcription, DNA	AT1G47655	NA	NA	Dof-type zinc finger DNA-binding family protein Dof-type zinc finger DNA-binding family protein	Potri.002G129600; Potri.014G036600
OG0000039	OG0000039_1471	0.0236833	Potra2n7c16311	Bpev01.c0368.g0008.m0001	FUN_021335-T1	PA_chr06_sUL004_G000003	PS_chr06_G024657	PS_chr08_G035003	GO:0003677; GO:0005634; GO:0006355	DNA binding; nucleus; regulation of transcription, DNA	AT3G50410	OBP1	OBF binding protein 1	OBF binding protein 1 OBF binding protein 1	Potri.005G131600; Potri.007G036400
OG0000039	OG0000039_1472	0.0219053	Potra2n5c11633	Bpev01.c0368.g0008.m0001	FUN_021335-T1	PA_chr06_sUL004_G000003	PS_chr06_G024657	PS_chr08_G035003	GO:0003677; GO:0005634; GO:0006355	DNA binding; nucleus; regulation of transcription, DNA	AT3G21270	ADOF2; DOF2	DOF zinc finger protein 2	DOF zinc finger protein 2 DOF zinc finger protein 2	Potri.003G034200; Potri.011G047500; Potri.004G038800
OG0000039	OG0000039_1473	0.0283667	Potra2n5c11639	Bpev01.c0368.g0008.m0001	FUN_021335-T1	PA_chr06_sUL004_G000003	PS_chr06_G024657	PS_chr08_G035003	GO:0003677; GO:0005634; GO:0006355	DNA binding; nucleus; regulation of transcription, DNA	AT3G50410	OBP1	OBF binding protein 1	OBF binding protein 1 OBF binding protein 1	Potri.005G131600; Potri.007G036400
OG0000039	OG0000039_1474	0.0219014	Potra2n14c27144	Bpev01.c0368.g0008.m0001	FUN_021335-T1	PA_chr06_sUL004_G000003	PS_chr06_G024657	PS_chr08_G035003	GO:0003677; GO:0005634; GO:0006355	DNA binding; nucleus; regulation of transcription, DNA	AT3G61850	DAG1	dof affecting germination 1	Dof-type zinc finger DNA-binding family protein Dof-type zinc finger DNA-binding family protein	Potri.014G100900; Potri.012G018700; Potri.002G174300; Potri.015G009300
OG0000039	OG0000039_1475	0.0220082	Potra2n2c4829	Bpev01.c0368.g0008.m0001	FUN_021335-T1	PA_chr06_sUL004_G000003	PS_chr06_G024657	PS_chr08_G035003	GO:0003677; GO:0005634; GO:0006355	DNA binding; nucleus; regulation of transcription, DNA	AT3G61850	DAG1	dof affecting germination 1	Dof-type zinc finger DNA-binding family protein Dof-type zinc finger DNA-binding family protein	Potri.014G100900; Potri.012G018700; Potri.002G174300; Potri.015G009300
OG0000039	OG0000039_1476	0.0239167	Potra2n203s34938	Bpev01.c0368.g0008.m0001	FUN_021335-T1	PA_chr06_sUL004_G000003	PS_chr06_G024657	PS_chr08_G035003	GO:0003677; GO:0005634; GO:0006355	DNA binding; nucleus; regulation of transcription, DNA	AT5G60200	TMO6	TARGET OF MONOPTEROS 6	TARGET OF MONOPTEROS 6 TARGET OF MONOPTEROS 6	Potri.005G134200; Potri.010G204800
OG0000039	OG0000039_1477	0.0363333	Potra2n14c26600	Bpev01.c0368.g0008.m0001	FUN_021335-T1	PA_chr06_sUL004_G000003	PS_chr06_G024657	PS_chr08_G035003	GO:0003677; GO:0005634; GO:0006355	DNA binding; nucleus; regulation of transcription, DNA	AT1G47655	NA	NA	Dof-type zinc finger DNA-binding family protein Dof-type zinc finger DNA-binding family protein	Potri.002G129600; Potri.014G036600
OG0000039	OG0000039_1479	0.0104833	Potra2n7c16311	Bpev01.c0015.g0225.m0001	FUN_021335-T1	PA_chr06_sUL004_G000003	PS_chr06_G024657	PS_chr08_G035003	GO:0003677; GO:0005634; GO:0006355	DNA binding; nucleus; regulation of transcription, DNA	AT3G50410	OBP1	OBF binding protein 1	OBF binding protein 1 OBF binding protein 1	Potri.005G131600; Potri.007G036400
OG0000039	OG0000039_1480	0.0087053	Potra2n5c11633	Bpev01.c0015.g0225.m0001	FUN_021335-T1	PA_chr06_sUL004_G000003	PS_chr06_G024657	PS_chr08_G035003	GO:0003677; GO:0005634; GO:0006355	DNA binding; nucleus; regulation of transcription, DNA	AT3G21270	ADOF2; DOF2	DOF zinc finger protein 2	DOF zinc finger protein 2 DOF zinc finger protein 2	Potri.003G034200; Potri.011G047500; Potri.004G038800
OG0000039	OG0000039_1481	0.0151667	Potra2n5c11639	Bpev01.c0015.g0225.m0001	FUN_021335-T1	PA_chr06_sUL004_G000003	PS_chr06_G024657	PS_chr08_G035003	GO:0003677; GO:0005634; GO:0006355	DNA binding; nucleus; regulation of transcription, DNA	AT3G50410	OBP1	OBF binding protein 1	OBF binding protein 1 OBF binding protein 1	Potri.005G131600; Potri.007G036400
OG0000039	OG0000039_1482	0.00870141	Potra2n14c27144	Bpev01.c0015.g0225.m0001	FUN_021335-T1	PA_chr06_sUL004_G000003	PS_chr06_G024657	PS_chr08_G035003	GO:0003677; GO:0005634; GO:0006355	DNA binding; nucleus; regulation of transcription, DNA	AT3G61850	DAG1	dof affecting germination 1	Dof-type zinc finger DNA-binding family protein Dof-type zinc finger DNA-binding family protein	Potri.014G100900; Potri.012G018700; Potri.002G174300; Potri.015G009300
OG0000039	OG0000039_1483	0.00880817	Potra2n2c4829	Bpev01.c0015.g0225.m0001	FUN_021335-T1	PA_chr06_sUL004_G000003	PS_chr06_G024657	PS_chr08_G035003	GO:0003677; GO:0005634; GO:0006355	DNA binding; nucleus; regulation of transcription, DNA	AT3G61850	DAG1	dof affecting germination 1	Dof-type zinc finger DNA-binding family protein Dof-type zinc finger DNA-binding family protein	Potri.014G100900; Potri.012G018700; Potri.002G174300; Potri.015G009300
OG0000039	OG0000039_1484	0.0107167	Potra2n203s34938	Bpev01.c0015.g0225.m0001	FUN_021335-T1	PA_chr06_sUL004_G000003	PS_chr06_G024657	PS_chr08_G035003	GO:0003677; GO:0005634; GO:0006355	DNA binding; nucleus; regulation of transcription, DNA	AT5G60200	TMO6	TARGET OF MONOPTEROS 6	TARGET OF MONOPTEROS 6 TARGET OF MONOPTEROS 6	Potri.005G134200; Potri.010G204800
OG0000039	OG0000039_1485	0.0231333	Potra2n14c26600	Bpev01.c0015.g0225.m0001	FUN_021335-T1	PA_chr06_sUL004_G000003	PS_chr06_G024657	PS_chr08_G035003	GO:0003677; GO:0005634; GO:0006355	DNA binding; nucleus; regulation of transcription, DNA	AT1G47655	NA	NA	Dof-type zinc finger DNA-binding family protein Dof-type zinc finger DNA-binding family protein	Potri.002G129600; Potri.014G036600
OG0000039	OG0000039_1487	0.0104834	Potra2n7c16311	Bpev01.c0363.g0021.m0001	FUN_021335-T1	PA_chr06_sUL004_G000003	PS_chr06_G024657	PS_chr08_G035003	GO:0003677; GO:0005634; GO:0006355	DNA binding; nucleus; regulation of transcription, DNA	AT3G50410	OBP1	OBF binding protein 1	OBF binding protein 1 OBF binding protein 1	Potri.005G131600; Potri.007G036400
OG0000039	OG0000039_1488	0.00870532	Potra2n5c11633	Bpev01.c0363.g0021.m0001	FUN_021335-T1	PA_chr06_sUL004_G000003	PS_chr06_G024657	PS_chr08_G035003	GO:0003677; GO:0005634; GO:0006355	DNA binding; nucleus; regulation of transcription, DNA	AT3G21270	ADOF2; DOF2	DOF zinc finger protein 2	DOF zinc finger protein 2 DOF zinc finger protein 2	Potri.003G034200; Potri.011G047500; Potri.004G038800
OG0000039	OG0000039_1489	0.0151667	Potra2n5c11639	Bpev01.c0363.g0021.m0001	FUN_021335-T1	PA_chr06_sUL004_G000003	PS_chr06_G024657	PS_chr08_G035003	GO:0003677; GO:0005634; GO:0006355	DNA binding; nucleus; regulation of transcription, DNA	AT3G50410	OBP1	OBF binding protein 1	OBF binding protein 1 OBF binding protein 1	Potri.005G131600; Potri.007G036400
OG0000039	OG0000039_1490	0.00870143	Potra2n14c27144	Bpev01.c0363.g0021.m0001	FUN_021335-T1	PA_chr06_sUL004_G000003	PS_chr06_G024657	PS_chr08_G035003	GO:0003677; GO:0005634; GO:0006355	DNA binding; nucleus; regulation of transcription, DNA	AT3G61850	DAG1	dof affecting germination 1	Dof-type zinc finger DNA-binding family protein Dof-type zinc finger DNA-binding family protein	Potri.014G100900; Potri.012G018700; Potri.002G174300; Potri.015G009300
OG0000039	OG0000039_1491	0.00880819	Potra2n2c4829	Bpev01.c0363.g0021.m0001	FUN_021335-T1	PA_chr06_sUL004_G000003	PS_chr06_G024657	PS_chr08_G035003	GO:0003677; GO:0005634; GO:0006355	DNA binding; nucleus; regulation of transcription, DNA	AT3G61850	DAG1	dof affecting germination 1	Dof-type zinc finger DNA-binding family protein Dof-type zinc finger DNA-binding family protein	Potri.014G100900; Potri.012G018700; Potri.002G174300; Potri.015G009300
OG0000039	OG0000039_1492	0.0107167	Potra2n203s34938	Bpev01.c0363.g0021.m0001	FUN_021335-T1	PA_chr06_sUL004_G000003	PS_chr06_G024657	PS_chr08_G035003	GO:0003677; GO:0005634; GO:0006355	DNA binding; nucleus; regulation of transcription, DNA	AT5G60200	TMO6	TARGET OF MONOPTEROS 6	TARGET OF MONOPTEROS 6 TARGET OF MONOPTEROS 6	Potri.005G134200; Potri.010G204800
OG0000039	OG0000039_1493	0.0231334	Potra2n14c26600	Bpev01.c0363.g0021.m0001	FUN_021335-T1	PA_chr06_sUL004_G000003	PS_chr06_G024657	PS_chr08_G035003	GO:0003677; GO:0005634; GO:0006355	DNA binding; nucleus; regulation of transcription, DNA	AT1G47655	NA	NA	Dof-type zinc finger DNA-binding family protein Dof-type zinc finger DNA-binding family protein	Potri.002G129600; Potri.014G036600
OG0000039	OG0000039_1494	0.0219	Potra2n2c5230	Bpev01.c0363.g0021.m0001	FUN_021335-T1	PA_chr06_sUL004_G000003	PS_chr06_G024657	PS_chr08_G035003	GO:0003677; GO:0005634; GO:0006355	DNA binding; nucleus; regulation of transcription, DNA	AT1G47655	NA	NA	Dof-type zinc finger DNA-binding family protein Dof-type zinc finger DNA-binding family protein	Potri.002G129600; Potri.014G036600
OG0000039	OG0000039_1500	0.0108017	Potra2n7c16311	Bpev01.c0027.g0145.m0001	FUN_013924-T1	PA_chr06_sUL004_G000003	PS_chr06_G024657	PS_chr08_G035003	GO:0003677; GO:0005634; GO:0006355	DNA binding; nucleus; regulation of transcription, DNA	AT3G50410	OBP1	OBF binding protein 1	OBF binding protein 1 OBF binding protein 1	Potri.005G131600; Potri.007G036400
OG0000039	OG0000039_1501	0.00902075	Potra2n5c11633	Bpev01.c0027.g0145.m0001	FUN_013924-T1	PA_chr06_sUL004_G000003	PS_chr06_G024657	PS_chr08_G035003	GO:0003677; GO:0005634; GO:0006355	DNA binding; nucleus; regulation of transcription, DNA	AT3G21270	ADOF2; DOF2	DOF zinc finger protein 2	DOF zinc finger protein 2 DOF zinc finger protein 2	Potri.003G034200; Potri.011G047500; Potri.004G038800
OG0000039	OG0000039_1502	0.015485	Potra2n5c11639	Bpev01.c0027.g0145.m0001	FUN_013924-T1	PA_chr06_sUL004_G000003	PS_chr06_G024657	PS_chr08_G035003	GO:0003677; GO:0005634; GO:0006355	DNA binding; nucleus; regulation of transcription, DNA	AT3G50410	OBP1	OBF binding protein 1	OBF binding protein 1 OBF binding protein 1	Potri.005G131600; Potri.007G036400
OG0000039	OG0000039_1503	0.00901974	Potra2n14c27144	Bpev01.c0027.g0145.m0001	FUN_013924-T1	PA_chr06_sUL004_G000003	PS_chr06_G024657	PS_chr08_G035003	GO:0003677; GO:0005634; GO:0006355	DNA binding; nucleus; regulation of transcription, DNA	AT3G61850	DAG1	dof affecting germination 1	Dof-type zinc finger DNA-binding family protein Dof-type zinc finger DNA-binding family protein	Potri.014G100900; Potri.012G018700; Potri.002G174300; Potri.015G009300
OG0000039	OG0000039_1504	0.00903867	Potra2n2c4829	Bpev01.c0027.g0145.m0001	FUN_013924-T1	PA_chr06_sUL004_G000003	PS_chr06_G024657	PS_chr08_G035003	GO:0003677; GO:0005634; GO:0006355	DNA binding; nucleus; regulation of transcription, DNA	AT3G61850	DAG1	dof affecting germination 1	Dof-type zinc finger DNA-binding family protein Dof-type zinc finger DNA-binding family protein	Potri.014G100900; Potri.012G018700; Potri.002G174300; Potri.015G009300
OG0000039	OG0000039_1505	0.011035	Potra2n203s34938	Bpev01.c0027.g0145.m0001	FUN_013924-T1	PA_chr06_sUL004_G000003	PS_chr06_G024657	PS_chr08_G035003	GO:0003677; GO:0005634; GO:0006355	DNA binding; nucleus; regulation of transcription, DNA	AT5G60200	TMO6	TARGET OF MONOPTEROS 6	TARGET OF MONOPTEROS 6 TARGET OF MONOPTEROS 6	Potri.005G134200; Potri.010G204800
OG0000039	OG0000039_1506	0.0234517	Potra2n14c26600	Bpev01.c0027.g0145.m0001	FUN_013924-T1	PA_chr06_sUL004_G000003	PS_chr06_G024657	PS_chr08_G035003	GO:0003677; GO:0005634; GO:0006355	DNA binding; nucleus; regulation of transcription, DNA	AT1G47655	NA	NA	Dof-type zinc finger DNA-binding family protein Dof-type zinc finger DNA-binding family protein	Potri.002G129600; Potri.014G036600
OG0000039	OG0000039_1507	0.0222183	Potra2n2c5230	Bpev01.c0027.g0145.m0001	FUN_013924-T1	PA_chr06_sUL004_G000003	PS_chr06_G024657	PS_chr08_G035003	GO:0003677; GO:0005634; GO:0006355	DNA binding; nucleus; regulation of transcription, DNA	AT1G47655	NA	NA	Dof-type zinc finger DNA-binding family protein Dof-type zinc finger DNA-binding family protein	Potri.002G129600; Potri.014G036600
OG0000039	OG0000039_1508	0.0222695	Potra2n15c29140	Bpev01.c0027.g0145.m0001	FUN_013924-T1	PA_chr06_sUL004_G000003	PS_chr06_G024657	PS_chr08_G035003	GO:0003677; GO:0005634; GO:0006355	DNA binding; nucleus; regulation of transcription, DNA	AT4G24060	NA	NA	Dof-type zinc finger DNA-binding family protein Dof-type zinc finger DNA-binding family protein	Potri.003G144500; Potri.001G086400
OG0000039	OG0000039_1510	0.0222183	Potra2n3c8126	Bpev01.c0027.g0145.m0001	FUN_013924-T1	PA_chr06_sUL004_G000003	PS_chr06_G024657	PS_chr08_G035003	GO:0003677; GO:0005634; GO:0006355	DNA binding; nucleus; regulation of transcription, DNA	AT3G21270	ADOF2; DOF2	DOF zinc finger protein 2	DOF zinc finger protein 2 DOF zinc finger protein 2	Potri.003G034200; Potri.011G047500; Potri.004G038800
OG0000039	OG0000039_1511	0.0108017	Potra2n7c16311	Bpev01.c0896.g0009.m0001	FUN_013924-T1	PA_chr06_sUL004_G000003	PS_chr06_G024657	PS_chr08_G035003	GO:0003677; GO:0005634; GO:0006355	DNA binding; nucleus; regulation of transcription, DNA	AT3G50410	OBP1	OBF binding protein 1	OBF binding protein 1 OBF binding protein 1	Potri.005G131600; Potri.007G036400
OG0000039	OG0000039_1512	0.00902075	Potra2n5c11633	Bpev01.c0896.g0009.m0001	FUN_013924-T1	PA_chr06_sUL004_G000003	PS_chr06_G024657	PS_chr08_G035003	GO:0003677; GO:0005634; GO:0006355	DNA binding; nucleus; regulation of transcription, DNA	AT3G21270	ADOF2; DOF2	DOF zinc finger protein 2	DOF zinc finger protein 2 DOF zinc finger protein 2	Potri.003G034200; Potri.011G047500; Potri.004G038800
[truncated: 199,029+ more rows]

## Sheet: Conserved genes unique
OrthoGroup	cliqueID	MeanCliqueSum	Asp	Birch	Cher	Nor	Scots	Lodge	GO_ID	GO_Term	Arab	Symbol	Name	Description	Poptri
[truncated: 2,443 more rows]

[truncated: 6 more sheets: Differentiated genes, VND genes (temp), Angio-specific genes, Angio-specific genes unique, Gymno-specific genes, Gymno-specific genes unique]
