# Supplementary material for: An evo-devo resource for wood: Comparative regulomics across dicot and conifer trees
Source: Research Square preprint supplement (doi:10.21203/rs.3.rs-7656402/v1), 2025-10-30
Supplement: Supplementary file 6 [file e751b142cc47dbb0ac92df17.xlsx]

## Sheet: Sheet1
OrthoGroup	Species1	GeneSpecies1	Species2	GeneSpecies2	Species1pVal	Species2pVal	Max.p.Val
N1.HOG0000000	Birch	Bpev01.c0457.g0011.m0001	Cher	FUN_008971-T1	3.56e-17	2.56e-16	2.56e-16
N1.HOG0000001	Lodge	PS_chr01_G000466	Nor	PA_chr01_G003708	1.20e-35	1.26e-32	1.26e-32
N1.HOG0000001	Lodge	PS_chr01_G000035	Nor	PA_chr01_G003708	2.08e-34	3.32e-31	3.32e-31
N1.HOG0000001	Lodge	PS_chr01_G000466	Nor	PA_chr02_G000999	6.99e-31	3.47e-33	6.99e-31
N1.HOG0000001	Lodge	PS_chr01_G000466	Nor	PA_chr01_G000149	1.35e-32	9.11e-30	9.11e-30
N1.HOG0000001	Lodge	PS_chr01_G000466	Nor	PA_chr02_G000992	1.71e-35	2.34e-29	2.34e-29
N1.HOG0000001	Lodge	PS_chr01_G000035	Nor	PA_chr01_G000149	7.55e-29	2.75e-28	2.75e-28
N1.HOG0000001	Lodge	PS_chr01_G005219	Nor	PA_chr01_G003708	3.95e-39	3.88e-28	3.88e-28
N1.HOG0000001	Lodge	PS_chr01_G005219	Nor	PA_chr02_G000999	7.45e-32	1.41e-27	1.41e-27
N1.HOG0000001	Lodge	PS_chr01_G000035	Nor	PA_chr02_G000999	7.14e-25	8.66e-29	7.14e-25
N1.HOG0000001	Lodge	PS_chr01_G000035	Nor	PA_chr01_G000837	2.59e-28	2.17e-24	2.17e-24
N1.HOG0000001	Lodge	PS_chr01_G000537	Nor	PA_chr01_G003708	1.94e-23	7.54e-23	7.54e-23
N1.HOG0000001	Lodge	PS_chr01_G005219	Nor	PA_chr02_G000992	5.87e-35	1.31e-22	1.31e-22
N1.HOG0000001	Lodge	PS_chr01_G000537	Nor	PA_chr02_G000999	2.96e-22	8.83e-24	2.96e-22
N1.HOG0000001	Lodge	PS_chr02_G008394	Nor	PA_chr01_G000837	3.34e-23	1.37e-21	1.37e-21
N1.HOG0000001	Lodge	PS_chr01_G000035	Nor	PA_chr02_G000992	1.74e-21	1.35e-21	1.74e-21
N1.HOG0000001	Lodge	PS_chr02_G008394	Nor	PA_chr01_G003708	3.74e-21	2.80e-23	3.74e-21
N1.HOG0000001	Lodge	PS_chr01_G005219	Nor	PA_chr01_G000837	9.28e-32	3.97e-21	3.97e-21
N1.HOG0000001	Lodge	PS_chr01_G000035	Nor	PA_chr01_G000723	1.90e-32	5.61e-21	5.61e-21
N1.HOG0000001	Lodge	PS_chr02_G008394	Nor	PA_chr01_G000146	1.45e-27	2.96e-19	2.96e-19
N1.HOG0000001	Lodge	PS_chr01_G000466	Nor	PA_chr01_G000837	1.92e-24	3.97e-19	3.97e-19
N1.HOG0000001	Lodge	PS_chr01_G005219	Nor	PA_chr01_G000731	9.76e-44	8.13e-19	8.13e-19
N1.HOG0000001	Lodge	PS_chr09_G038279	Nor	PA_chr01_G000146	8.17e-19	5.65e-20	8.17e-19
N1.HOG0000001	Lodge	PS_chr02_G008394	Nor	PA_chr02_G000999	9.58e-19	1.95e-21	9.58e-19
N1.HOG0000001	Lodge	PS_chr01_G000537	Nor	PA_chr01_G000149	1.36e-21	1.86e-18	1.86e-18
N1.HOG0000001	Lodge	PS_chr02_G008394	Nor	PA_chr01_G000723	1.03e-26	3.02e-18	3.02e-18
N1.HOG0000001	Lodge	PS_chr09_G038279	Nor	PA_chr01_G000723	9.92e-18	4.70e-21	9.92e-18
N1.HOG0000001	Lodge	PS_chr01_G000466	Nor	PA_chr01_G000731	6.34e-34	1.04e-17	1.04e-17
N1.HOG0000001	Lodge	PS_chr01_G000537	Nor	PA_chr02_G000992	1.45e-17	9.86e-18	1.45e-17
N1.HOG0000001	Lodge	PS_chr01_G000035	Nor	PA_chr01_G000735	2.02e-18	2.63e-17	2.63e-17
N1.HOG0000001	Lodge	PS_chr02_G008394	Nor	PA_chr01_G000149	2.78e-17	4.54e-19	2.78e-17
N1.HOG0000001	Lodge	PS_chr09_G038279	Nor	PA_chr01_G003708	3.88e-17	6.26e-28	3.88e-17
N1.HOG0000001	Lodge	PS_chr01_G000035	Nor	PA_chr01_G000146	6.87e-28	5.64e-17	5.64e-17
N1.HOG0000001	Lodge	PS_chr01_G005219	Nor	PA_chr01_G000149	7.56e-26	7.22e-17	7.22e-17
N1.HOG0000001	Lodge	PS_chr01_G000466	Nor	PA_chr01_G000735	8.90e-25	3.81e-16	3.81e-16
N1.HOG0000001	Lodge	PS_chr02_G008394	Nor	PA_chr01_G000735	1.76e-16	4.60e-16	4.6e-16
N1.HOG0000001	Lodge	PS_chr01_G000112	Nor	PA_chr01_G000147	3.91e-17	5.10e-16	5.1e-16
N1.HOG0000001	Lodge	PS_chr09_G038279	Nor	PA_chr02_G000999	6.94e-16	7.55e-29	6.94e-16
N1.HOG0000001	Lodge	PS_chr02_G008394	Nor	PA_chr02_G000992	1.07e-15	1.15e-15	1.15e-15
N1.HOG0000001	Lodge	PS_chr01_G005219	Nor	PA_chr01_G000735	1.22e-29	1.21e-15	1.21e-15
N1.HOG0000001	Lodge	PS_chr01_G005219	Nor	PA_chr01_G000147	1.29e-37	1.41e-15	1.41e-15
N1.HOG0000001	Lodge	PS_chr01_G000537	Nor	PA_chr01_G000731	2.53e-24	1.63e-15	1.63e-15
N1.HOG0000001	Lodge	PS_chr01_G000764	Nor	PA_chr02_G000992	2.10e-15	2.50e-18	2.1e-15
N1.HOG0000001	Lodge	PS_chr09_G038279	Nor	PA_chr01_G000731	1.70e-15	3.42e-15	3.42e-15
N1.HOG0000001	Lodge	PS_chr09_G038279	Nor	PA_chr01_G000149	5.22e-15	7.64e-23	5.22e-15
N1.HOG0000001	Lodge	PS_chr01_G000466	Nor	PA_chr01_G000147	2.24e-31	7.12e-15	7.12e-15
N1.HOG0000001	Lodge	PS_chr01_G000111	Nor	PA_chr02_G000999	1.47e-14	8.08e-16	1.47e-14
N1.HOG0000001	Lodge	PS_chr01_G000537	Nor	PA_chr01_G000147	5.70e-22	1.72e-14	1.72e-14
N1.HOG0000001	Lodge	PS_chr01_G000111	Nor	PA_chr01_G003708	1.92e-14	1.08e-14	1.92e-14
N1.HOG0000001	Lodge	PS_chr01_G000035	Nor	PA_chr01_G000147	6.85e-19	5.09e-14	5.09e-14
N1.HOG0000001	Lodge	PS_chr09_G038279	Nor	PA_chr01_G000837	5.45e-14	6.41e-21	5.45e-14
N1.HOG0000001	Lodge	PS_chr01_G000035	Nor	PA_chr01_G000731	1.28e-21	8.46e-14	8.46e-14
N1.HOG0000001	Lodge	PS_chr01_G000112	Nor	PA_chr01_G000731	1.22e-13	5.02e-15	1.22e-13
N1.HOG0000001	Lodge	PS_chr01_G000537	Nor	PA_chr01_G000735	1.51e-17	2.44e-13	2.44e-13
N1.HOG0000001	Lodge	PS_chr01_G000537	Nor	PA_chr01_G000723	7.82e-19	4.15e-13	4.15e-13
N1.HOG0000001	Lodge	PS_chr01_G000537	Nor	PA_chr01_G000837	4.52e-17	4.76e-13	4.76e-13
N1.HOG0000001	Lodge	PS_chr01_G000111	Nor	PA_chr01_G000837	1.12e-13	8.49e-13	8.49e-13
N1.HOG0000001	Lodge	PS_chr02_G006045	Nor	PA_chr01_G000723	9.78e-13	1.31e-16	9.78e-13
N1.HOG0000001	Lodge	PS_chr02_G006045	Nor	PA_chr01_G003708	1.14e-12	2.88e-21	1.14e-12
N1.HOG0000001	Lodge	PS_chr01_G000466	Nor	PA_chr01_G000723	1.64e-16	2.19e-12	2.19e-12
N1.HOG0000001	Lodge	PS_chr01_G000111	Nor	PA_chr02_G000992	8.73e-12	9.15e-13	8.73e-12
N1.HOG0000001	Lodge	PS_chr09_G038279	Nor	PA_chr01_G000793	4.96e-13	9.04e-12	9.04e-12
N1.HOG0000001	Lodge	PS_chr01_G000036	Nor	PA_chr01_G003708	9.18e-12	1.36e-17	9.18e-12
N1.HOG0000001	Lodge	PS_chr09_G038705	Nor	PA_chr01_G003708	2.90e-11	7.28e-20	2.9e-11
N1.HOG0000001	Lodge	PS_chr01_G005219	Nor	PA_chr01_G000723	4.10e-20	6.40e-11	6.4e-11
N1.HOG0000001	Lodge	PS_chr01_G000035	Nor	PA_chr09_G001707	4.52e-14	6.57e-11	6.57e-11
N1.HOG0000001	Lodge	PS_chr02_G008394	Nor	PA_chr09_G001707	2.29e-13	7.71e-11	7.71e-11
N1.HOG0000001	Lodge	PS_chr01_G005219	Nor	PA_chr01_G000146	1.08e-18	8.05e-11	8.05e-11
N1.HOG0000001	Lodge	PS_chr01_G000112	Nor	PA_chr01_G003708	1.74e-10	1.06e-23	1.74e-10
N1.HOG0000001	Lodge	PS_chr01_G000111	Nor	PA_chr01_G000723	5.33e-15	2.24e-10	2.24e-10
N1.HOG0000001	Lodge	PS_chr09_G038279	Nor	PA_chr01_G000147	2.53e-10	6.20e-12	2.53e-10
N1.HOG0000001	Lodge	PS_chr02_G008394	Nor	PA_chr01_G000147	2.70e-13	2.86e-10	2.86e-10
N1.HOG0000001	Lodge	PS_chr01_G000111	Nor	PA_chr01_G000731	3.83e-16	4.09e-10	4.09e-10
N1.HOG0000001	Lodge	PS_chr01_G000111	Nor	PA_chr01_G000735	1.72e-12	6.94e-10	6.94e-10
N1.HOG0000001	Lodge	PS_chr01_G000035	Nor	PA_chr01_G000793	3.47e-22	7.15e-10	7.15e-10
N1.HOG0000001	Lodge	PS_chr01_G000036	Nor	PA_chr01_G000149	7.73e-10	9.84e-17	7.73e-10
N1.HOG0000001	Lodge	PS_chr01_G000036	Nor	PA_chr02_G000999	1.77e-09	1.56e-20	1.77e-09
N1.HOG0000001	Lodge	PS_chr09_G038279	Nor	PA_chr02_G000992	2.64e-09	1.00e-16	2.64e-09
N1.HOG0000001	Lodge	PS_chr09_G038279	Nor	PA_chr01_G000735	2.80e-09	1.99e-14	2.8e-09
N1.HOG0000001	Lodge	PS_chr02_G008394	Nor	PA_chr01_G000731	2.03e-12	3.13e-09	3.13e-09
N1.HOG0000001	Lodge	PS_chr01_G000112	Nor	PA_chr01_G000146	8.55e-10	4.53e-09	4.53e-09
N1.HOG0000001	Lodge	PS_chr01_G000111	Nor	PA_chr01_G000146	1.94e-13	4.92e-09	4.92e-09
N1.HOG0000001	Lodge	PS_chr09_G038279	Nor	PA_chr09_G001707	6.61e-09	5.49e-11	6.61e-09
N1.HOG0000001	Lodge	PS_chr02_G006045	Nor	PA_chr02_G000999	9.27e-09	1.38e-16	9.27e-09
N1.HOG0000001	Lodge	PS_chr02_G006045	Nor	PA_chr01_G000731	1.01e-08	6.90e-10	1.01e-08
N1.HOG0000001	Lodge	PS_chr01_G000111	Nor	PA_chr01_G000149	2.52e-10	1.13e-08	1.13e-08
N1.HOG0000001	Lodge	PS_chr01_G000112	Nor	PA_chr02_G003920	1.38e-12	1.79e-08	1.79e-08
N1.HOG0000001	Lodge	PS_chr01_G000537	Nor	PA_chr09_G001707	3.94e-13	1.86e-08	1.86e-08
N1.HOG0000001	Lodge	PS_chr01_G000466	Nor	PA_chr02_G003920	7.80e-31	2.05e-08	2.05e-08
N1.HOG0000001	Lodge	PS_chr02_G008394	Nor	PA_chr01_G000793	2.80e-18	2.73e-08	2.73e-08
N1.HOG0000001	Lodge	PS_chr01_G000537	Nor	PA_chr01_G000146	3.16e-18	2.92e-08	2.92e-08
N1.HOG0000001	Lodge	PS_chr01_G000112	Nor	PA_chr02_G000999	3.96e-08	1.24e-18	3.96e-08
N1.HOG0000001	Lodge	PS_chr02_G006045	Nor	PA_chr01_G000837	4.78e-08	1.53e-15	4.78e-08
N1.HOG0000001	Lodge	PS_chr01_G000764	Nor	PA_chr01_G000147	7.91e-10	5.46e-08	5.46e-08
N1.HOG0000001	Lodge	PS_chr09_G038705	Nor	PA_chr01_G000149	8.84e-08	5.88e-12	8.84e-08
N1.HOG0000001	Lodge	PS_chr02_G006048	Nor	PA_chr01_G000839	9.29e-08	7.04e-09	9.29e-08
N1.HOG0000001	Lodge	PS_chr09_G038292	Nor	PA_chr01_G000839	2.02e-10	1.46e-07	1.46e-07
N1.HOG0000001	Lodge	PS_chr01_G000112	Nor	PA_chr01_G000837	1.85e-07	1.87e-12	1.85e-07
N1.HOG0000001	Lodge	PS_chr01_G000111	Nor	PA_chr09_G001707	4.48e-12	2.17e-07	2.17e-07
N1.HOG0000001	Lodge	PS_chr01_G000467	Nor	PA_chr01_G000147	2.49e-07	3.15e-10	2.49e-07
N1.HOG0000001	Lodge	PS_chr01_G000764	Nor	PA_chr01_G000731	1.35e-11	2.71e-07	2.71e-07
N1.HOG0000001	Lodge	PS_chr01_G000036	Nor	PA_chr02_G000992	3.58e-07	1.31e-09	3.58e-07
N1.HOG0000001	Lodge	PS_chr02_G006045	Nor	PA_chr01_G000146	4.14e-07	2.57e-11	4.14e-07
N1.HOG0000001	Lodge	PS_chr02_G006045	Nor	PA_chr01_G000147	8.17e-08	4.86e-07	4.86e-07
N1.HOG0000001	Lodge	PS_chr09_G038292	Nor	PA_chr01_G000731	7.17e-07	1.46e-07	7.17e-07
N1.HOG0000001	Lodge	PS_chr01_G000764	Nor	PA_chr02_G000999	8.01e-07	4.36e-09	8.01e-07
N1.HOG0000001	Lodge	PS_chr02_G006045	Nor	PA_chr01_G000149	8.23e-07	8.17e-12	8.23e-07
N1.HOG0000001	Lodge	PS_chr01_G000466	Nor	PA_chr01_G000146	9.09e-13	8.56e-07	8.56e-07
N1.HOG0000001	Lodge	PS_chr01_G000036	Nor	PA_chr01_G000793	9.51e-09	9.20e-07	9.2e-07
N1.HOG0000001	Lodge	PS_chr01_G000112	Nor	PA_chr01_G000723	9.39e-07	7.81e-10	9.39e-07
N1.HOG0000001	Lodge	PS_chr09_G038292	Nor	PA_chr01_G000146	9.95e-07	2.98e-07	9.95e-07
N1.HOG0000001	Lodge	PS_chr01_G000467	Nor	PA_chr01_G003708	1.49e-06	3.52e-21	1.49e-06
N1.HOG0000001	Lodge	PS_chr01_G005219	Nor	PA_chr01_G000839	3.40e-17	1.56e-06	1.56e-06
N1.HOG0000001	Lodge	PS_chr01_G005219	Nor	PA_chr09_G001707	6.49e-14	1.77e-06	1.77e-06
N1.HOG0000001	Lodge	PS_chr01_G000111	Nor	PA_chr01_G000839	1.11e-13	1.89e-06	1.89e-06
N1.HOG0000001	Lodge	PS_chr09_G038705	Nor	PA_chr02_G000999	2.18e-06	1.34e-16	2.18e-06
N1.HOG0000001	Lodge	PS_chr01_G000036	Nor	PA_chr01_G000147	9.90e-07	2.31e-06	2.31e-06
N1.HOG0000001	Lodge	PS_chr09_G038705	Nor	PA_chr01_G000723	2.50e-06	1.05e-09	2.5e-06
N1.HOG0000001	Lodge	PS_chr01_G000036	Nor	PA_chr01_G000837	2.88e-06	4.45e-13	2.88e-06
N1.HOG0000001	Lodge	PS_chr09_G038705	Nor	PA_chr01_G000837	3.50e-06	1.03e-10	3.5e-06
N1.HOG0000001	Lodge	PS_chr09_G038292	Nor	PA_chr01_G000147	1.50e-06	3.80e-06	3.8e-06
N1.HOG0000001	Lodge	PS_chr01_G000036	Nor	PA_chr01_G000146	4.14e-06	6.40e-08	4.14e-06
N1.HOG0000001	Lodge	PS_chr09_G038292	Nor	PA_chr01_G000723	4.67e-06	3.66e-09	4.67e-06
N1.HOG0000001	Lodge	PS_chr01_G000036	Nor	PA_chr01_G000731	2.35e-06	4.98e-06	4.98e-06
N1.HOG0000001	Lodge	PS_chr01_G000036	Nor	PA_chr01_G000735	5.02e-06	2.82e-08	5.02e-06
N1.HOG0000001	Lodge	PS_chr09_G038705	Nor	PA_chr01_G000147	6.96e-08	5.64e-06	5.64e-06
N1.HOG0000001	Lodge	PS_chr01_G000035	Nor	PA_chr02_G003920	7.64e-24	6.12e-06	6.12e-06
N1.HOG0000001	Lodge	PS_chr01_G000112	Nor	PA_chr01_G000149	6.92e-06	4.72e-10	6.92e-06
N1.HOG0000001	Lodge	PS_chr01_G000467	Nor	PA_chr01_G000731	7.22e-06	3.10e-09	7.22e-06
N1.HOG0000001	Lodge	PS_chr01_G000112	Nor	PA_chr02_G000992	7.72e-06	4.71e-11	7.72e-06
N1.HOG0000001	Lodge	PS_chr01_G000467	Nor	PA_chr02_G003920	2.23e-08	1.08e-05	1.08e-05
N1.HOG0000001	Lodge	PS_chr01_G000468	Nor	PA_chr01_G000146	1.35e-05	1.38e-11	1.35e-05
N1.HOG0000001	Lodge	PS_chr01_G000467	Nor	PA_chr01_G000723	1.61e-05	8.10e-14	1.61e-05
N1.HOG0000001	Lodge	PS_chr09_G038279	Nor	PA_chr02_G003920	6.41e-10	2.35e-05	2.35e-05
N1.HOG0000001	Lodge	PS_chr02_G006045	Nor	PA_chr01_G000793	2.38e-05	7.85e-06	2.38e-05
N1.HOG0000001	Lodge	PS_chr01_G000036	Nor	PA_chr01_G000723	2.44e-05	5.15e-06	2.44e-05
N1.HOG0000001	Lodge	PS_chr01_G000112	Nor	PA_chr01_G000735	2.74e-05	1.27e-09	2.74e-05
N1.HOG0000001	Lodge	PS_chr01_G000466	Nor	PA_chr01_G000839	5.74e-13	3.05e-05	3.05e-05
N1.HOG0000001	Lodge	PS_chr01_G000466	Nor	PA_chr09_G001707	3.56e-08	3.48e-05	3.48e-05
N1.HOG0000001	Lodge	PS_chr01_G000537	Nor	PA_chr02_G003920	1.19e-18	3.50e-05	3.5e-05
N1.HOG0000001	Lodge	PS_chr01_G000764	Nor	PA_chr01_G000149	3.75e-05	6.24e-08	3.75e-05
N1.HOG0000001	Lodge	PS_chr01_G000537	Nor	PA_chr01_G000792	1.58e-11	4.92e-05	4.92e-05
N1.HOG0000001	Lodge	PS_chr09_G038292	Nor	PA_chr01_G003708	4.95e-05	3.28e-12	4.95e-05
N1.HOG0000001	Lodge	PS_chr09_G038705	Nor	PA_chr01_G000735	5.52e-05	1.27e-07	5.52e-05
N1.HOG0000001	Lodge	PS_chr01_G000537	Nor	PA_chr01_G000793	4.17e-12	6.87e-05	6.87e-05
N1.HOG0000001	Lodge	PS_chr01_G000466	Nor	PA_chr01_G000792	1.70e-13	8.25e-05	8.25e-05
N1.HOG0000001	Lodge	PS_chr01_G000111	Nor	PA_chr01_G000147	1.90e-13	8.36e-05	8.36e-05
N1.HOG0000001	Lodge	PS_chr01_G000112	Nor	PA_chr01_G000839	7.39e-06	8.38e-05	8.38e-05
N1.HOG0000001	Lodge	PS_chr09_G038705	Nor	PA_chr01_G000146	8.97e-05	1.49e-06	8.97e-05
N1.HOG0000001	Lodge	PS_chr01_G005219	Nor	PA_chr02_G003920	4.66e-26	1.20e-04	0.00012
N1.HOG0000001	Lodge	PS_chr09_G038705	Nor	PA_chr02_G000992	1.32e-04	7.75e-09	0.000132
N1.HOG0000001	Lodge	PS_chr02_G006045	Nor	PA_chr01_G000839	5.37e-10	1.34e-04	0.000134
N1.HOG0000001	Lodge	PS_chr09_G038292	Nor	PA_chr02_G000999	1.37e-04	6.36e-10	0.000137
N1.HOG0000001	Lodge	PS_chr09_G038705	Nor	PA_chr02_G003920	2.51e-09	1.40e-04	0.00014
N1.HOG0000001	Lodge	PS_chr09_G038705	Nor	PA_chr01_G000731	7.30e-05	1.42e-04	0.000142
N1.HOG0000001	Lodge	PS_chr01_G000467	Nor	PA_chr01_G000837	1.46e-04	2.18e-14	0.000146
N1.HOG0000001	Lodge	PS_chr01_G000467	Nor	PA_chr01_G000146	2.04e-04	6.88e-10	0.000204
N1.HOG0000001	Lodge	PS_chr09_G038705	Nor	PA_chr09_G001707	2.19e-04	2.08e-05	0.000219
N1.HOG0000001	Lodge	PS_chr09_G038292	Nor	PA_chr02_G000992	2.30e-04	5.74e-10	0.00023
N1.HOG0000001	Lodge	PS_chr01_G000466	Nor	PA_chr01_G000793	4.33e-11	2.42e-04	0.000242
N1.HOG0000001	Lodge	PS_chr09_G038705	Nor	PA_chr01_G000839	4.96e-08	2.75e-04	0.000275
N1.HOG0000001	Lodge	PS_chr09_G038292	Nor	PA_chr09_G001707	3.12e-04	7.68e-06	0.000312
N1.HOG0000001	Lodge	PS_chr02_G006045	Nor	PA_chr01_G000735	3.65e-04	1.48e-05	0.000365
N1.HOG0000001	Lodge	PS_chr01_G000112	Nor	PA_chr01_G000793	3.66e-04	3.59e-04	0.000366
N1.HOG0000001	Lodge	PS_chr02_G006045	Nor	PA_chr02_G000992	3.75e-04	7.58e-07	0.000375
N1.HOG0000001	Lodge	PS_chr01_G000467	Nor	PA_chr02_G000999	3.90e-04	1.79e-17	0.00039
N1.HOG0000001	Lodge	PS_chr09_G038292	Nor	PA_chr01_G000735	4.08e-04	5.42e-07	0.000408
N1.HOG0000001	Lodge	PS_sUP0984_G056879	Nor	PA_chr01_G000723	4.12e-04	2.38e-06	0.000412
N1.HOG0000001	Lodge	PS_sUP0984_G056879	Nor	PA_chr01_G000147	4.13e-04	1.53e-05	0.000413
N1.HOG0000001	Lodge	PS_chr01_G000467	Nor	PA_chr02_G000992	4.46e-04	7.00e-12	0.000446
N1.HOG0000001	Lodge	PS_chr01_G000467	Nor	PA_chr01_G000149	4.95e-04	7.37e-11	0.000495
N1.HOG0000001	Lodge	PS_chr02_G006045	Nor	PA_chr01_G000732	3.03e-06	6.66e-04	0.000666
N1.HOG0000001	Lodge	PS_chr01_G000764	Nor	PA_chr09_G001707	2.67e-04	6.95e-04	0.000695
N1.HOG0000001	Lodge	PS_chr02_G008394	Nor	PA_chr02_G003920	3.45e-15	8.68e-04	0.000868
N1.HOG0000001	Lodge	PS_chr09_G038705	Nor	PA_chr01_G000793	1.03e-03	6.23e-04	0.00103
N1.HOG0000001	Lodge	PS_chr01_G000467	Nor	PA_chr01_G000735	1.19e-03	3.38e-11	0.00119
N1.HOG0000001	Lodge	PS_chr01_G000035	Nor	PA_chr01_G000732	2.28e-14	1.24e-03	0.00124
N1.HOG0000001	Lodge	PS_chr01_G000036	Nor	PA_chr01_G000732	2.56e-04	1.26e-03	0.00126
N1.HOG0000001	Lodge	PS_chr01_G000468	Nor	PA_chr01_G000793	1.34e-03	1.15e-04	0.00134
N1.HOG0000001	Lodge	PS_chr01_G000110	Nor	PA_chr01_G000839	5.42e-04	1.37e-03	0.00137
N1.HOG0000001	Lodge	PS_chr09_G038279	Nor	PA_chr01_G000839	1.92e-06	1.40e-03	0.0014
N1.HOG0000001	Lodge	PS_chr01_G000036	Nor	PA_chr09_G001707	1.62e-03	1.54e-05	0.00162
N1.HOG0000001	Lodge	PS_chr01_G005219	Nor	PA_chr01_G000792	4.34e-13	1.63e-03	0.00163
N1.HOG0000001	Lodge	PS_chr02_G008394	Nor	PA_chr01_G000839	7.74e-09	1.63e-03	0.00163
N1.HOG0000001	Lodge	PS_chr02_G006045	Nor	PA_chr02_G003920	2.63e-05	1.76e-03	0.00176
N1.HOG0000001	Lodge	PS_chr01_G000468	Nor	PA_chr01_G000723	1.89e-03	5.96e-10	0.00189
N1.HOG0000001	Lodge	PS_chr01_G000112	Nor	PA_chr09_G001707	1.95e-03	1.88e-04	0.00195
N1.HOG0000001	Lodge	PS_chr01_G000036	Nor	PA_chr01_G000792	6.81e-06	2.54e-03	0.00254
N1.HOG0000001	Lodge	PS_chr01_G000764	Nor	PA_chr01_G000837	4.78e-04	3.23e-03	0.00323
N1.HOG0000001	Lodge	PS_chr01_G000764	Nor	PA_chr01_G000735	3.45e-03	1.17e-05	0.00345
N1.HOG0000001	Lodge	PS_chr01_G000035	Nor	PA_chr01_G000792	3.55e-11	4.27e-03	0.00427
N1.HOG0000001	Lodge	PS_chr01_G000035	Nor	PA_chr01_G000839	1.03e-07	5.02e-03	0.00502
N1.HOG0000001	Lodge	PS_chr01_G000537	Nor	PA_chr01_G000839	7.23e-09	5.79e-03	0.00579
N1.HOG0000001	Lodge	PS_chr09_G038292	Nor	PA_chr01_G000793	2.77e-03	6.60e-03	0.0066
N1.HOG0000001	Lodge	PS_chr01_G005219	Nor	PA_chr01_G000793	9.93e-14	6.62e-03	0.00662
N1.HOG0000001	Lodge	PS_chr01_G000036	Nor	PA_chr02_G003920	4.32e-06	8.61e-03	0.00861
N1.HOG0000001	Lodge	PS_chr01_G000036	Nor	PA_chr01_G000839	1.69e-03	1.33e-02	0.0133
N1.HOG0000001	Lodge	PS_chr01_G000110	Nor	PA_chr01_G000146	1.46e-02	1.21e-03	0.0146
N1.HOG0000001	Lodge	PS_chr09_G038292	Nor	PA_chr01_G000837	1.47e-02	4.96e-05	0.0147
N1.HOG0000001	Lodge	PS_sUP0984_G056879	Nor	PA_chr01_G000146	1.48e-02	1.61e-03	0.0148
N1.HOG0000001	Lodge	PS_chr01_G000111	Nor	PA_chr01_G000793	1.37e-08	1.50e-02	0.015
N1.HOG0000001	Lodge	PS_sUP0984_G056879	Nor	PA_chr02_G000999	1.51e-02	5.55e-05	0.0151
N1.HOG0000001	Lodge	PS_chr02_G008394	Nor	PA_chr01_G000048	2.67e-04	1.60e-02	0.016
N1.HOG0000001	Lodge	PS_chr02_G006045	Nor	PA_chr01_G000792	7.10e-04	1.64e-02	0.0164
N1.HOG0000001	Lodge	PS_sUP0984_G056879	Nor	PA_chr01_G000731	1.65e-02	4.66e-04	0.0165
N1.HOG0000001	Lodge	PS_chr01_G000467	Nor	PA_chr01_G000793	3.69e-03	1.70e-02	0.017
N1.HOG0000001	Lodge	PS_chr01_G000468	Nor	PA_chr01_G003708	1.72e-02	1.50e-07	0.0172
N1.HOG0000001	Lodge	PS_chr01_G000466	Nor	PA_chr01_G000732	6.05e-07	1.72e-02	0.0172
N1.HOG0000001	Lodge	PS_chr01_G000764	Nor	PA_chr01_G003708	2.01e-02	2.60e-05	0.0201
N1.HOG0000001	Lodge	PS_chr01_G000112	Nor	PA_chr01_G000792	2.52e-02	2.34e-02	0.0252
N1.HOG0000001	Lodge	PS_chr01_G000468	Nor	PA_chr01_G000735	3.60e-02	2.40e-05	0.036
N1.HOG0000001	Lodge	PS_chr01_G000111	Nor	PA_chr02_G003920	1.78e-11	3.70e-02	0.037
N1.HOG0000001	Lodge	PS_chr02_G008394	Nor	PA_chr01_G000732	5.08e-08	4.29e-02	0.0429
N1.HOG0000001	Lodge	PS_chr09_G038705	Nor	PA_chr01_G000732	1.90e-03	4.84e-02	0.0484
N1.HOG0000001	Lodge	PS_chr01_G000467	Nor	PA_chr09_G001707	6.19e-02	8.34e-07	0.0619
N1.HOG0000001	Lodge	PS_sUP0984_G056879	Nor	PA_chr09_G001707	6.19e-02	3.64e-04	0.0619
N1.HOG0000001	Lodge	PS_chr02_G006045	Nor	PA_chr09_G001707	6.56e-02	2.13e-02	0.0656
N1.HOG0000001	Lodge	PS_chr01_G000468	Nor	PA_chr01_G000147	6.67e-02	5.32e-04	0.0667
N1.HOG0000001	Lodge	PS_chr01_G000468	Nor	PA_chr01_G000839	7.12e-02	6.58e-03	0.0712
N1.HOG0000001	Lodge	PS_chr01_G000468	Nor	PA_chr02_G003920	7.28e-02	3.41e-02	0.0728
N1.HOG0000001	Lodge	PS_chr09_G038279	Nor	PA_chr01_G000792	6.54e-03	7.49e-02	0.0749
N1.HOG0000001	Lodge	PS_chr01_G005219	Nor	PA_chr01_G000732	1.10e-07	8.08e-02	0.0808
N1.HOG0000001	Lodge	PS_chr09_G038279	Nor	PA_chr01_G000732	2.67e-03	8.74e-02	0.0874
N1.HOG0000001	Lodge	PS_chr02_G008394	Nor	PA_chr01_G000792	3.21e-07	8.93e-02	0.0893
N1.HOG0000001	Lodge	PS_chr01_G000467	Nor	PA_chr01_G000732	4.96e-03	9.70e-02	0.097
N1.HOG0000001	Lodge	PS_chr01_G000112	Scots	PS_chr01_G000112	6.35e-105	2.14e-103	2.14e-103
N1.HOG0000001	Lodge	PS_chr01_G000764	Scots	PS_chr01_G000764	1.15e-124	5.79e-101	5.79e-101
N1.HOG0000001	Lodge	PS_chr01_G005219	Scots	PS_chr01_G005219	7.43e-119	2.54e-79	2.54e-79
N1.HOG0000001	Lodge	PS_chr01_G000112	Scots	PS_chr01_G005219	1.05e-76	1.50e-82	1.05e-76
N1.HOG0000001	Lodge	PS_chr01_G005219	Scots	PS_chr01_G000112	7.08e-126	9.17e-75	9.17e-75
N1.HOG0000001	Lodge	PS_chr01_G000466	Scots	PS_chr02_G007598	1.17e-86	1.14e-70	1.14e-70
N1.HOG0000001	Lodge	PS_chr01_G000466	Scots	PS_chr01_G005219	2.12e-94	5.01e-63	5.01e-63
N1.HOG0000001	Lodge	PS_chr02_G006045	Scots	PS_chr01_G000112	2.14e-70	5.82e-63	5.82e-63
N1.HOG0000001	Lodge	PS_chr01_G000537	Scots	PS_chr01_G000466	8.17e-62	1.02e-59	1.02e-59
N1.HOG0000001	Lodge	PS_chr01_G005219	Scots	PS_chr01_G000466	1.13e-72	5.21e-59	5.21e-59
N1.HOG0000001	Lodge	PS_chr01_G005219	Scots	PS_chr02_G007598	1.97e-84	4.47e-58	4.47e-58
N1.HOG0000001	Lodge	PS_chr01_G000466	Scots	PS_chr01_G000466	3.52e-59	3.43e-57	3.43e-57
N1.HOG0000001	Lodge	PS_chr01_G000537	Scots	PS_chr02_G007598	1.02e-62	1.86e-52	1.86e-52
N1.HOG0000001	Lodge	PS_chr01_G000466	Scots	PS_chr03_G013442	1.75e-54	1.60e-50	1.6e-50
N1.HOG0000001	Lodge	PS_chr01_G000035	Scots	PS_chr01_G000466	1.33e-58	3.81e-50	3.81e-50
N1.HOG0000001	Lodge	PS_chr01_G000112	Scots	PS_chr02_G006045	1.63e-51	6.15e-50	6.15e-50
N1.HOG0000001	Lodge	PS_chr01_G005219	Scots	PS_chr02_G008747	1.36e-52	3.90e-49	3.9e-49
N1.HOG0000001	Lodge	PS_chr02_G006045	Scots	PS_chr02_G006045	1.84e-48	4.37e-47	4.37e-47
N1.HOG0000001	Lodge	PS_chr01_G005219	Scots	PS_chr02_G006045	7.45e-75	1.70e-46	1.7e-46
N1.HOG0000001	Lodge	PS_chr01_G005219	Scots	PS_chr02_G008394	9.43e-65	1.83e-43	1.83e-43
N1.HOG0000001	Lodge	PS_chr01_G000537	Scots	PS_chr02_G008747	6.31e-41	2.43e-49	6.31e-41
N1.HOG0000001	Lodge	PS_chr01_G000537	Scots	PS_chr03_G013442	1.35e-40	1.23e-39	1.23e-39
N1.HOG0000001	Lodge	PS_chr09_G038292	Scots	PS_chr01_G000112	1.52e-45	2.26e-39	2.26e-39
N1.HOG0000001	Lodge	PS_chr01_G000035	Scots	PS_chr09_G038279	2.49e-59	2.59e-39	2.59e-39
N1.HOG0000001	Lodge	PS_chr01_G000466	Scots	PS_chr02_G008747	2.99e-39	5.84e-44	2.99e-39
N1.HOG0000001	Lodge	PS_chr02_G006045	Scots	PS_chr01_G005219	8.08e-45	1.44e-38	1.44e-38
N1.HOG0000001	Lodge	PS_chr01_G000466	Scots	PS_chr01_G000112	4.27e-62	2.24e-36	2.24e-36
N1.HOG0000001	Lodge	PS_chr09_G038279	Scots	PS_chr01_G000112	2.56e-37	2.28e-36	2.28e-36
N1.HOG0000001	Lodge	PS_chr09_G038279	Scots	PS_chr02_G007598	2.51e-36	1.79e-37	2.51e-36
N1.HOG0000001	Lodge	PS_chr01_G000035	Scots	PS_chr02_G008747	4.62e-44	5.13e-36	5.13e-36
N1.HOG0000001	Lodge	PS_chr09_G038279	Scots	PS_chr01_G000466	1.11e-35	6.47e-52	1.11e-35
N1.HOG0000001	Lodge	PS_chr09_G038279	Scots	PS_chr02_G006045	3.27e-35	6.21e-39	3.27e-35
N1.HOG0000001	Lodge	PS_chr01_G000537	Scots	PS_chr01_G005219	7.66e-46	2.04e-34	2.04e-34
N1.HOG0000001	Lodge	PS_chr09_G038292	Scots	PS_chr01_G000466	3.15e-34	3.07e-47	3.15e-34
N1.HOG0000001	Lodge	PS_chr01_G005219	Scots	PS_chr03_G013442	4.44e-49	3.70e-34	3.7e-34
N1.HOG0000001	Lodge	PS_chr01_G000035	Scots	PS_chr03_G013442	7.74e-44	5.21e-32	5.21e-32
N1.HOG0000001	Lodge	PS_chr01_G000035	Scots	PS_chr02_G007598	1.52e-50	1.60e-31	1.6e-31
N1.HOG0000001	Lodge	PS_chr01_G000466	Scots	PS_chr02_G008394	9.26e-42	1.74e-31	1.74e-31
N1.HOG0000001	Lodge	PS_chr02_G008394	Scots	PS_chr01_G000466	7.66e-37	2.49e-31	2.49e-31
N1.HOG0000001	Lodge	PS_chr01_G000537	Scots	PS_chr09_G038279	1.15e-37	3.74e-31	3.74e-31
N1.HOG0000001	Lodge	PS_chr01_G000466	Scots	PS_chr02_G006045	2.36e-49	1.13e-30	1.13e-30
N1.HOG0000001	Lodge	PS_chr01_G000111	Scots	PS_chr02_G008747	5.87e-32	5.66e-30	5.66e-30
N1.HOG0000001	Lodge	PS_chr09_G038279	Scots	PS_chr09_G038279	1.70e-29	4.67e-37	1.7e-29
N1.HOG0000001	Lodge	PS_chr02_G008394	Scots	PS_chr02_G008747	1.25e-32	5.04e-29	5.04e-29
N1.HOG0000001	Lodge	PS_chr01_G000112	Scots	PS_chr01_G000466	7.82e-29	1.19e-43	7.82e-29
N1.HOG0000001	Lodge	PS_chr01_G000537	Scots	PS_chr02_G008394	4.88e-33	1.16e-27	1.16e-27
N1.HOG0000001	Lodge	PS_chr01_G000112	Scots	PS_chr02_G007598	1.24e-27	4.82e-39	1.24e-27
N1.HOG0000001	Lodge	PS_chr02_G008394	Scots	PS_chr09_G038279	1.33e-37	2.50e-26	2.5e-26
N1.HOG0000001	Lodge	PS_chr01_G000035	Scots	PS_chr02_G008394	6.06e-47	2.89e-26	2.89e-26
N1.HOG0000001	Lodge	PS_chr01_G000112	Scots	PS_chr02_G008394	3.04e-26	7.13e-31	3.04e-26
N1.HOG0000001	Lodge	PS_chr09_G038279	Scots	PS_chr01_G005219	2.26e-29	3.25e-25	3.25e-25
N1.HOG0000001	Lodge	PS_chr01_G005219	Scots	PS_chr09_G038279	4.73e-39	4.59e-25	4.59e-25
N1.HOG0000001	Lodge	PS_chr09_G038279	Scots	PS_chr03_G013442	7.60e-25	7.35e-30	7.6e-25
N1.HOG0000001	Lodge	PS_chr01_G000466	Scots	PS_chr09_G038279	3.46e-28	8.23e-25	8.23e-25
N1.HOG0000001	Lodge	PS_chr02_G006045	Scots	PS_chr02_G008394	2.16e-24	2.60e-27	2.16e-24
N1.HOG0000001	Lodge	PS_chr09_G038279	Scots	PS_chr02_G008394	2.45e-23	1.65e-27	2.45e-23
N1.HOG0000001	Lodge	PS_chr09_G038292	Scots	PS_chr02_G006045	3.49e-23	1.21e-23	3.49e-23
N1.HOG0000001	Lodge	PS_chr01_G000111	Scots	PS_chr01_G000466	3.71e-27	4.71e-23	4.71e-23
N1.HOG0000001	Lodge	PS_chr01_G000537	Scots	PS_chr02_G006045	1.10e-31	4.03e-22	4.03e-22
N1.HOG0000001	Lodge	PS_chr09_G038292	Scots	PS_chr02_G007598	1.11e-21	1.03e-28	1.11e-21
N1.HOG0000001	Lodge	PS_chr09_G038279	Scots	PS_chr02_G008747	4.12e-21	1.80e-37	4.12e-21
N1.HOG0000001	Lodge	PS_chr02_G006045	Scots	PS_chr01_G000466	7.65e-21	1.01e-31	7.65e-21
N1.HOG0000001	Lodge	PS_chr09_G038292	Scots	PS_chr09_G038279	7.84e-21	5.15e-29	7.84e-21
N1.HOG0000001	Lodge	PS_chr01_G000466	Scots	PS_chr02_G006048	2.33e-31	8.28e-21	8.28e-21
N1.HOG0000001	Lodge	PS_chr01_G000035	Scots	PS_chr02_G006048	2.04e-45	1.84e-20	1.84e-20
N1.HOG0000001	Lodge	PS_chr09_G038279	Scots	PS_chr02_G006048	1.90e-20	1.39e-21	1.9e-20
N1.HOG0000001	Lodge	PS_chr01_G000035	Scots	PS_chr01_G005219	1.03e-37	7.40e-20	7.4e-20
N1.HOG0000001	Lodge	PS_chr01_G005219	Scots	PS_chr02_G006048	4.73e-41	8.58e-20	8.58e-20
N1.HOG0000001	Lodge	PS_chr02_G008394	Scots	PS_chr02_G007598	7.42e-30	8.66e-20	8.66e-20
N1.HOG0000001	Lodge	PS_chr01_G000112	Scots	PS_chr02_G008747	1.89e-19	1.12e-40	1.89e-19
N1.HOG0000001	Lodge	PS_chr09_G038279	Scots	PS_chr01_G000467	4.97e-19	1.40e-19	4.97e-19
N1.HOG0000001	Lodge	PS_chr01_G000537	Scots	PS_chr01_G000112	4.40e-30	6.00e-19	6e-19
N1.HOG0000001	Lodge	PS_chr01_G000111	Scots	PS_chr02_G008394	4.86e-31	7.44e-19	7.44e-19
N1.HOG0000001	Lodge	PS_chr02_G006045	Scots	PS_chr02_G007598	9.34e-19	3.28e-23	9.34e-19
N1.HOG0000001	Lodge	PS_chr09_G038292	Scots	PS_chr02_G008747	1.60e-18	1.26e-32	1.6e-18
N1.HOG0000001	Lodge	PS_chr09_G038705	Scots	PS_chr01_G000466	2.85e-18	4.17e-26	2.85e-18
N1.HOG0000001	Lodge	PS_chr09_G038292	Scots	PS_chr01_G000110	9.01e-23	5.87e-18	5.87e-18
N1.HOG0000001	Lodge	PS_chr01_G000112	Scots	PS_chr03_G013442	6.80e-18	1.16e-26	6.8e-18
N1.HOG0000001	Lodge	PS_chr01_G000537	Scots	PS_chr02_G006048	9.43e-26	8.05e-18	8.05e-18
N1.HOG0000001	Lodge	PS_chr09_G038292	Scots	PS_chr01_G005219	5.15e-18	9.21e-18	9.21e-18
N1.HOG0000001	Lodge	PS_chr01_G000111	Scots	PS_chr01_G000112	2.86e-38	1.29e-17	1.29e-17
N1.HOG0000001	Lodge	PS_chr01_G000111	Scots	PS_chr02_G006045	1.84e-28	2.43e-17	2.43e-17
N1.HOG0000001	Lodge	PS_chr09_G038705	Scots	PS_chr02_G008394	2.74e-17	2.94e-19	2.74e-17
N1.HOG0000001	Lodge	PS_chr01_G000035	Scots	PS_chr01_G000468	3.26e-26	3.11e-17	3.11e-17
N1.HOG0000001	Lodge	PS_chr02_G008394	Scots	PS_chr01_G000468	8.31e-26	3.14e-17	3.14e-17
N1.HOG0000001	Lodge	PS_chr02_G008394	Scots	PS_chr03_G013442	3.08e-22	3.61e-17	3.61e-17
N1.HOG0000001	Lodge	PS_chr01_G005219	Scots	PS_chr01_G000468	1.44e-24	4.16e-17	4.16e-17
N1.HOG0000001	Lodge	PS_chr09_G038292	Scots	PS_chr02_G006048	4.60e-17	5.09e-19	4.6e-17
N1.HOG0000001	Lodge	PS_chr01_G000112	Scots	PS_chr09_G038279	1.49e-16	8.74e-29	1.49e-16
N1.HOG0000001	Lodge	PS_chr01_G000035	Scots	PS_chr02_G006045	1.43e-30	3.15e-16	3.15e-16
N1.HOG0000001	Lodge	PS_chr02_G008394	Scots	PS_chr02_G006048	8.45e-30	5.31e-16	5.31e-16
N1.HOG0000001	Lodge	PS_chr01_G000111	Scots	PS_chr09_G038279	1.30e-22	9.31e-16	9.31e-16
N1.HOG0000001	Lodge	PS_chr09_G038705	Scots	PS_chr03_G013442	9.81e-16	1.46e-23	9.81e-16
N1.HOG0000001	Lodge	PS_chr01_G000466	Scots	PS_chr01_G000467	2.15e-23	1.27e-15	1.27e-15
N1.HOG0000001	Lodge	PS_chr01_G005219	Scots	PS_chr01_G000467	9.01e-31	1.53e-15	1.53e-15
N1.HOG0000001	Lodge	PS_chr01_G000112	Scots	PS_chr01_G000110	2.61e-16	1.55e-15	1.55e-15
N1.HOG0000001	Lodge	PS_chr01_G000035	Scots	PS_chr01_G000467	5.33e-30	2.29e-15	2.29e-15
N1.HOG0000001	Lodge	PS_chr01_G000036	Scots	PS_chr01_G000466	4.33e-15	4.42e-19	4.33e-15
N1.HOG0000001	Lodge	PS_chr02_G008394	Scots	PS_chr02_G008394	1.55e-27	4.60e-15	4.6e-15
N1.HOG0000001	Lodge	PS_chr01_G000537	Scots	PS_chr01_G000467	8.16e-20	2.42e-14	2.42e-14
N1.HOG0000001	Lodge	PS_chr09_G038705	Scots	PS_chr02_G007598	3.15e-14	1.14e-17	3.15e-14
N1.HOG0000001	Lodge	PS_chr01_G000112	Scots	PS_chr02_G006048	4.19e-14	4.80e-20	4.19e-14
N1.HOG0000001	Lodge	PS_chr09_G038292	Scots	PS_chr02_G008394	4.33e-14	2.42e-17	4.33e-14
N1.HOG0000001	Lodge	PS_chr01_G000111	Scots	PS_chr02_G007598	1.24e-23	5.01e-14	5.01e-14
N1.HOG0000001	Lodge	PS_chr01_G000036	Scots	PS_chr02_G008394	4.36e-15	5.73e-14	5.73e-14
N1.HOG0000001	Lodge	PS_chr02_G008394	Scots	PS_chr01_G000467	2.27e-22	1.31e-13	1.31e-13
N1.HOG0000001	Lodge	PS_chr09_G038279	Scots	PS_chr01_G000468	1.99e-13	1.38e-19	1.99e-13
N1.HOG0000001	Lodge	PS_chr01_G000035	Scots	PS_chr01_G000035	1.46e-18	2.79e-13	2.79e-13
N1.HOG0000001	Lodge	PS_chr02_G008394	Scots	PS_chr02_G006045	4.87e-25	4.68e-13	4.68e-13
N1.HOG0000001	Lodge	PS_chr02_G006045	Scots	PS_chr02_G008747	6.60e-13	3.51e-25	6.6e-13
N1.HOG0000001	Lodge	PS_chr01_G000036	Scots	PS_chr02_G006045	3.61e-15	7.90e-13	7.9e-13
N1.HOG0000001	Lodge	PS_chr02_G006045	Scots	PS_chr03_G013442	1.26e-12	2.45e-16	1.26e-12
N1.HOG0000001	Lodge	PS_chr01_G000036	Scots	PS_chr02_G007598	3.58e-16	2.84e-12	2.84e-12
N1.HOG0000001	Lodge	PS_chr01_G000111	Scots	PS_chr03_G013442	4.49e-15	3.20e-12	3.2e-12
N1.HOG0000001	Lodge	PS_chr01_G000035	Scots	PS_chr01_G000112	9.26e-29	4.00e-12	4e-12
N1.HOG0000001	Lodge	PS_chr01_G000537	Scots	PS_chr01_G000468	9.34e-15	4.23e-12	4.23e-12
N1.HOG0000001	Lodge	PS_chr09_G038705	Scots	PS_chr01_G000112	8.41e-18	8.61e-12	8.61e-12
N1.HOG0000001	Lodge	PS_chr09_G038705	Scots	PS_chr02_G006045	2.71e-15	1.03e-11	1.03e-11
N1.HOG0000001	Lodge	PS_chr01_G000466	Scots	PS_chr01_G000468	1.51e-11	3.84e-12	1.51e-11
N1.HOG0000001	Lodge	PS_chr01_G000036	Scots	PS_chr03_G013442	3.26e-11	2.95e-14	3.26e-11
N1.HOG0000001	Lodge	PS_chr09_G038279	Scots	PS_chr09_G038292	1.62e-15	4.16e-11	4.16e-11
N1.HOG0000001	Lodge	PS_chr09_G038705	Scots	PS_chr01_G005219	3.95e-14	4.61e-11	4.61e-11
N1.HOG0000001	Lodge	PS_chr09_G038705	Scots	PS_chr09_G038279	4.78e-11	4.70e-19	4.78e-11
N1.HOG0000001	Lodge	PS_chr09_G038705	Scots	PS_chr02_G006048	5.55e-11	1.79e-12	5.55e-11
N1.HOG0000001	Lodge	PS_chr01_G000467	Scots	PS_chr02_G007598	7.27e-11	1.36e-14	7.27e-11
N1.HOG0000001	Lodge	PS_chr09_G038705	Scots	PS_chr01_G000467	8.43e-11	1.14e-15	8.43e-11
N1.HOG0000001	Lodge	PS_chr02_G006045	Scots	PS_chr09_G038279	1.54e-10	6.42e-15	1.54e-10
N1.HOG0000001	Lodge	PS_chr01_G000036	Scots	PS_chr01_G000467	2.38e-10	4.35e-11	2.38e-10
N1.HOG0000001	Lodge	PS_chr02_G008394	Scots	PS_chr01_G005219	1.26e-15	3.78e-10	3.78e-10
N1.HOG0000001	Lodge	PS_chr01_G005219	Scots	PS_chr01_G000035	5.99e-15	3.86e-10	3.86e-10
N1.HOG0000001	Lodge	PS_chr01_G000111	Scots	PS_chr01_G005219	1.93e-19	4.45e-10	4.45e-10
N1.HOG0000001	Lodge	PS_chr01_G005219	Scots	PS_chr01_G000110	2.58e-23	5.26e-10	5.26e-10
N1.HOG0000001	Lodge	PS_chr09_G038292	Scots	PS_chr03_G013442	5.52e-10	6.93e-19	5.52e-10
N1.HOG0000001	Lodge	PS_chr02_G008394	Scots	PS_chr01_G000111	1.44e-25	6.25e-10	6.25e-10
N1.HOG0000001	Lodge	PS_chr09_G038705	Scots	PS_chr02_G008747	9.53e-10	3.94e-19	9.53e-10
N1.HOG0000001	Lodge	PS_chr02_G006045	Scots	PS_chr01_G000468	1.22e-09	8.97e-15	1.22e-09
N1.HOG0000001	Lodge	PS_chr01_G000036	Scots	PS_chr01_G000112	5.30e-13	1.62e-09	1.62e-09
N1.HOG0000001	Lodge	PS_chr01_G000764	Scots	PS_chr02_G007598	1.64e-09	3.34e-10	1.64e-09
N1.HOG0000001	Lodge	PS_chr09_G038292	Scots	PS_chr01_G000111	2.85e-09	4.66e-10	2.85e-09
N1.HOG0000001	Lodge	PS_chr09_G038279	Scots	PS_chr01_G000111	3.29e-11	2.92e-09	2.92e-09
N1.HOG0000001	Lodge	PS_chr02_G008394	Scots	PS_chr01_G000035	7.73e-16	2.97e-09	2.97e-09
N1.HOG0000001	Lodge	PS_chr01_G000467	Scots	PS_chr01_G000467	4.54e-09	9.68e-16	4.54e-09
N1.HOG0000001	Lodge	PS_chr02_G008394	Scots	PS_chr01_G000112	1.73e-20	4.81e-09	4.81e-09
N1.HOG0000001	Lodge	PS_chr02_G006045	Scots	PS_chr02_G006048	5.87e-09	2.85e-10	5.87e-09
N1.HOG0000001	Lodge	PS_chr01_G000467	Scots	PS_chr01_G005219	1.33e-11	7.99e-09	7.99e-09
N1.HOG0000001	Lodge	PS_chr01_G000036	Scots	PS_chr09_G038279	9.33e-09	6.02e-10	9.33e-09
N1.HOG0000001	Lodge	PS_chr01_G000036	Scots	PS_chr01_G005219	1.08e-12	1.03e-08	1.03e-08
N1.HOG0000001	Lodge	PS_chr01_G000112	Scots	PS_chr01_G000468	1.37e-08	3.75e-14	1.37e-08
N1.HOG0000001	Lodge	PS_chr02_G006045	Scots	PS_chr01_G000110	3.19e-12	1.40e-08	1.4e-08
N1.HOG0000001	Lodge	PS_chr01_G000110	Scots	PS_chr01_G000110	2.29e-09	1.62e-08	1.62e-08
N1.HOG0000001	Lodge	PS_chr09_G038705	Scots	PS_chr01_G000468	2.21e-08	9.86e-09	2.21e-08
N1.HOG0000001	Lodge	PS_chr01_G000467	Scots	PS_chr09_G038279	2.53e-08	7.00e-22	2.53e-08
N1.HOG0000001	Lodge	PS_chr01_G000035	Scots	PS_chr09_G038292	1.96e-22	2.67e-08	2.67e-08
N1.HOG0000001	Lodge	PS_chr01_G000111	Scots	PS_chr01_G000110	3.18e-23	2.92e-08	2.92e-08
N1.HOG0000001	Lodge	PS_chr01_G000111	Scots	PS_chr02_G006048	2.41e-20	3.55e-08	3.55e-08
N1.HOG0000001	Lodge	PS_chr01_G000467	Scots	PS_chr02_G008394	4.58e-08	8.70e-14	4.58e-08
N1.HOG0000001	Lodge	PS_chr01_G000111	Scots	PS_chr01_G000035	8.42e-12	5.43e-08	5.43e-08
N1.HOG0000001	Lodge	PS_chr01_G000036	Scots	PS_chr02_G008747	6.86e-08	3.81e-17	6.86e-08
N1.HOG0000001	Lodge	PS_chr01_G000466	Scots	PS_chr01_G000035	4.23e-08	7.25e-08	7.25e-08
N1.HOG0000001	Lodge	PS_chr02_G008394	Scots	PS_chr09_G038292	2.08e-17	8.75e-08	8.75e-08
N1.HOG0000001	Lodge	PS_chr09_G038705	Scots	PS_chr09_G038292	1.31e-09	1.04e-07	1.04e-07
N1.HOG0000001	Lodge	PS_chr01_G000036	Scots	PS_chr02_G006048	2.04e-11	1.11e-07	1.11e-07
N1.HOG0000001	Lodge	PS_chr01_G000111	Scots	PS_chr01_G000468	6.84e-09	1.13e-07	1.13e-07
N1.HOG0000001	Lodge	PS_sUP0984_G056879	Scots	PS_chr09_G038279	1.17e-07	1.62e-08	1.17e-07
N1.HOG0000001	Lodge	PS_chr01_G000466	Scots	PS_sUP0984_G056879	2.00e-12	1.18e-07	1.18e-07
N1.HOG0000001	Lodge	PS_chr01_G000467	Scots	PS_chr01_G000112	1.29e-07	3.85e-10	1.29e-07
N1.HOG0000001	Lodge	PS_chr09_G038279	Scots	PS_chr01_G000035	1.54e-07	7.22e-13	1.54e-07
N1.HOG0000001	Lodge	PS_chr02_G006045	Scots	PS_chr09_G038292	8.18e-08	1.76e-07	1.76e-07
N1.HOG0000001	Lodge	PS_chr01_G000467	Scots	PS_chr02_G006048	1.82e-07	1.92e-09	1.82e-07
N1.HOG0000001	Lodge	PS_chr01_G000112	Scots	PS_chr01_G000467	2.66e-07	1.68e-12	2.66e-07
N1.HOG0000001	Lodge	PS_chr01_G000111	Scots	PS_chr01_G000467	4.28e-12	3.47e-07	3.47e-07
N1.HOG0000001	Lodge	PS_chr01_G005219	Scots	PS_chr01_G000111	6.07e-15	4.17e-07	4.17e-07
N1.HOG0000001	Lodge	PS_chr01_G000035	Scots	PS_chr01_G000111	1.86e-26	4.17e-07	4.17e-07
N1.HOG0000001	Lodge	PS_chr01_G000537	Scots	PS_chr01_G000035	4.70e-07	3.23e-09	4.7e-07
N1.HOG0000001	Lodge	PS_chr01_G000537	Scots	PS_chr09_G038292	5.91e-11	7.65e-07	7.65e-07
N1.HOG0000001	Lodge	PS_chr01_G000112	Scots	PS_chr01_G000111	1.33e-06	5.83e-07	1.33e-06
N1.HOG0000001	Lodge	PS_chr01_G000537	Scots	PS_chr01_G000111	2.73e-11	1.57e-06	1.57e-06
N1.HOG0000001	Lodge	PS_chr02_G006045	Scots	PS_chr01_G000035	1.80e-06	1.46e-10	1.8e-06
N1.HOG0000001	Lodge	PS_chr09_G038292	Scots	PS_chr09_G038292	1.85e-06	4.22e-07	1.85e-06
N1.HOG0000001	Lodge	PS_chr01_G000466	Scots	PS_chr09_G038292	1.30e-21	2.09e-06	2.09e-06
N1.HOG0000001	Lodge	PS_chr01_G005219	Scots	PS_sUP0984_G056879	3.50e-10	2.11e-06	2.11e-06
N1.HOG0000001	Lodge	PS_chr01_G000036	Scots	PS_chr01_G000035	2.27e-06	3.46e-11	2.27e-06
N1.HOG0000001	Lodge	PS_chr01_G000111	Scots	PS_chr01_G000111	1.79e-13	3.06e-06	3.06e-06
N1.HOG0000001	Lodge	PS_chr01_G000035	Scots	PS_sUP0984_G056879	5.98e-15	3.19e-06	3.19e-06
N1.HOG0000001	Lodge	PS_chr01_G000537	Scots	PS_chr02_G009021	3.25e-06	6.94e-09	3.25e-06
N1.HOG0000001	Lodge	PS_chr01_G000467	Scots	PS_chr03_G013442	3.26e-06	5.26e-12	3.26e-06
N1.HOG0000001	Lodge	PS_chr01_G000112	Scots	PS_sUP0984_G056879	1.95e-06	3.43e-06	3.43e-06
N1.HOG0000001	Lodge	PS_chr01_G000537	Scots	PS_sUP0984_G056879	2.75e-11	3.47e-06	3.47e-06
N1.HOG0000001	Lodge	PS_chr09_G038705	Scots	PS_chr01_G000111	2.81e-07	4.68e-06	4.68e-06
N1.HOG0000001	Lodge	PS_chr01_G000467	Scots	PS_chr01_G000035	6.27e-06	1.80e-12	6.27e-06
N1.HOG0000001	Lodge	PS_chr02_G008394	Scots	PS_chr01_G000537	4.98e-15	6.48e-06	6.48e-06
N1.HOG0000001	Lodge	PS_chr02_G006045	Scots	PS_chr01_G000467	1.07e-05	2.31e-09	1.07e-05
N1.HOG0000001	Lodge	PS_chr01_G000468	Scots	PS_chr01_G000467	1.17e-05	8.60e-07	1.17e-05
N1.HOG0000001	Lodge	PS_chr01_G005219	Scots	PS_chr09_G038292	1.43e-25	1.29e-05	1.29e-05
N1.HOG0000001	Lodge	PS_chr01_G000112	Scots	PS_chr01_G000035	1.30e-05	7.35e-10	1.3e-05
N1.HOG0000001	Lodge	PS_chr01_G000466	Scots	PS_chr01_G000111	6.33e-10	1.51e-05	1.51e-05
N1.HOG0000001	Lodge	PS_chr01_G000468	Scots	PS_chr09_G038279	1.54e-05	1.92e-09	1.54e-05
N1.HOG0000001	Lodge	PS_chr02_G006045	Scots	PS_chr01_G000111	6.14e-07	1.60e-05	1.6e-05
N1.HOG0000001	Lodge	PS_chr01_G000467	Scots	PS_chr02_G008747	1.94e-05	2.05e-15	1.94e-05
N1.HOG0000001	Lodge	PS_chr01_G000468	Scots	PS_chr01_G000466	1.99e-05	4.04e-10	1.99e-05
N1.HOG0000001	Lodge	PS_chr02_G008394	Scots	PS_chr02_G009021	2.09e-05	7.38e-07	2.09e-05
N1.HOG0000001	Lodge	PS_chr01_G000112	Scots	PS_chr09_G038292	2.10e-05	4.86e-06	2.1e-05
N1.HOG0000001	Lodge	PS_chr01_G000466	Scots	PS_chr02_G009021	2.34e-05	2.77e-08	2.34e-05
N1.HOG0000001	Lodge	PS_chr01_G000467	Scots	PS_chr01_G000468	2.44e-05	1.89e-10	2.44e-05
N1.HOG0000001	Lodge	PS_chr01_G000468	Scots	PS_chr01_G000111	2.45e-05	9.84e-06	2.45e-05
N1.HOG0000001	Lodge	PS_chr01_G000036	Scots	PS_chr01_G000111	3.81e-10	3.76e-05	3.76e-05
N1.HOG0000001	Lodge	PS_chr01_G000036	Scots	PS_chr01_G000468	4.72e-05	4.17e-09	4.72e-05
N1.HOG0000001	Lodge	PS_sUP0984_G056879	Scots	PS_chr02_G008747	4.73e-05	2.67e-07	4.73e-05
N1.HOG0000001	Lodge	PS_sUP0984_G056879	Scots	PS_chr02_G008394	3.38e-05	5.85e-05	5.85e-05
N1.HOG0000001	Lodge	PS_chr09_G038292	Scots	PS_chr01_G000035	6.03e-05	1.43e-10	6.03e-05
N1.HOG0000001	Lodge	PS_chr01_G000537	Scots	PS_chr01_G000764	1.72e-05	6.33e-05	6.33e-05
N1.HOG0000001	Lodge	PS_chr09_G038706	Scots	PS_chr09_G038706	7.56e-07	6.46e-05	6.46e-05
N1.HOG0000001	Lodge	PS_chr01_G000111	Scots	PS_chr09_G038292	2.83e-15	6.46e-05	6.46e-05
N1.HOG0000001	Lodge	PS_chr09_G038705	Scots	PS_chr01_G000035	7.31e-05	4.07e-09	7.31e-05
N1.HOG0000001	Lodge	PS_sUP0984_G056879	Scots	PS_chr01_G000035	1.72e-04	4.05e-07	0.000172
N1.HOG0000001	Lodge	PS_chr01_G000764	Scots	PS_chr03_G013442	1.86e-04	7.77e-11	0.000186
N1.HOG0000001	Lodge	PS_chr01_G000467	Scots	PS_chr01_G000466	2.41e-04	1.05e-15	0.000241
N1.HOG0000001	Lodge	PS_chr01_G005219	Scots	PS_chr02_G009021	2.96e-04	2.41e-07	0.000296
N1.HOG0000001	Lodge	PS_chr01_G000036	Scots	PS_chr09_G038292	8.25e-10	3.60e-04	0.00036
N1.HOG0000001	Lodge	PS_chr01_G000467	Scots	PS_sUP0984_G056879	4.30e-04	4.47e-04	0.000447
N1.HOG0000001	Lodge	PS_chr09_G038279	Scots	PS_sUP0984_G056879	2.23e-06	4.79e-04	0.000479
N1.HOG0000001	Lodge	PS_chr01_G000537	Scots	PS_chr01_G000110	2.17e-06	6.63e-04	0.000663
N1.HOG0000001	Lodge	PS_sUP0984_G056879	Scots	PS_chr01_G000466	3.00e-04	6.83e-04	0.000683
N1.HOG0000001	Lodge	PS_chr01_G000467	Scots	PS_chr02_G006045	7.94e-04	1.30e-05	0.000794
N1.HOG0000001	Lodge	PS_chr01_G000764	Scots	PS_chr01_G000466	8.06e-04	1.25e-05	0.000806
N1.HOG0000001	Lodge	PS_sUP0984_G056879	Scots	PS_chr01_G000467	8.72e-04	1.22e-04	0.000872
N1.HOG0000001	Lodge	PS_chr09_G038299	Scots	PS_chr09_G038706	7.12e-06	1.05e-03	0.00105
N1.HOG0000001	Lodge	PS_chr01_G000467	Scots	PS_chr09_G038292	9.96e-07	1.31e-03	0.00131
N1.HOG0000001	Lodge	PS_chr09_G038292	Scots	PS_chr01_G000467	1.50e-03	2.37e-06	0.0015
N1.HOG0000001	Lodge	PS_chr09_G038279	Scots	PS_chr01_G000110	6.86e-05	1.68e-03	0.00168
N1.HOG0000001	Lodge	PS_chr01_G000036	Scots	PS_chr01_G000110	2.99e-07	1.69e-03	0.00169
N1.HOG0000001	Lodge	PS_chr02_G006045	Scots	PS_sUP0984_G056879	2.75e-04	1.79e-03	0.00179
N1.HOG0000001	Lodge	PS_chr01_G000764	Scots	PS_sUP0984_G056879	5.40e-04	1.94e-03	0.00194
N1.HOG0000001	Lodge	PS_chr01_G000035	Scots	PS_chr01_G000110	6.33e-17	2.10e-03	0.0021
N1.HOG0000001	Lodge	PS_chr01_G000110	Scots	PS_chr01_G000112	2.44e-06	2.20e-03	0.0022
N1.HOG0000001	Lodge	PS_sUP0984_G056879	Scots	PS_chr09_G038292	8.86e-04	2.50e-03	0.0025
N1.HOG0000001	Lodge	PS_chr01_G000035	Scots	PS_chr01_G000537	3.70e-14	2.77e-03	0.00277
N1.HOG0000001	Lodge	PS_sUP0984_G056879	Scots	PS_chr03_G013442	2.88e-03	8.38e-04	0.00288
N1.HOG0000001	Lodge	PS_chr01_G000035	Scots	PS_chr02_G009021	4.03e-03	5.47e-04	0.00403
N1.HOG0000001	Lodge	PS_chr02_G008394	Scots	PS_sUP0984_G056879	2.63e-08	4.15e-03	0.00415
N1.HOG0000001	Lodge	PS_chr01_G000110	Scots	PS_chr02_G006045	4.62e-03	3.51e-03	0.00462
N1.HOG0000001	Lodge	PS_chr09_G038292	Scots	PS_sUP0984_G056879	1.61e-03	5.38e-03	0.00538
N1.HOG0000001	Lodge	PS_chr01_G000468	Scots	PS_chr02_G008394	7.62e-03	1.74e-04	0.00762
N1.HOG0000001	Lodge	PS_chr01_G000111	Scots	PS_chr02_G009021	7.88e-03	3.78e-03	0.00788
N1.HOG0000001	Lodge	PS_chr02_G006045	Scots	PS_chr01_G000537	3.99e-04	8.34e-03	0.00834
N1.HOG0000001	Lodge	PS_sUP0984_G056879	Scots	PS_chr01_G000537	2.31e-03	8.73e-03	0.00873
N1.HOG0000001	Lodge	PS_chr01_G000468	Scots	PS_chr01_G000468	9.54e-03	4.77e-06	0.00954
N1.HOG0000001	Lodge	PS_chr01_G000110	Scots	PS_chr02_G008747	1.01e-02	1.07e-07	0.0101
N1.HOG0000001	Lodge	PS_chr01_G000468	Scots	PS_chr02_G006048	1.05e-02	6.27e-03	0.0105
N1.HOG0000001	Lodge	PS_chr01_G000467	Scots	PS_chr01_G000110	6.80e-04	1.11e-02	0.0111
N1.HOG0000001	Lodge	PS_chr01_G000468	Scots	PS_chr09_G038299	1.51e-04	1.12e-02	0.0112
N1.HOG0000001	Lodge	PS_chr01_G000110	Scots	PS_chr01_G000467	1.20e-02	5.12e-04	0.012
N1.HOG0000001	Lodge	PS_chr09_G038705	Scots	PS_chr02_G009021	1.26e-02	2.60e-04	0.0126
N1.HOG0000001	Lodge	PS_chr09_G038292	Scots	PS_chr01_G000468	1.37e-02	6.75e-06	0.0137
N1.HOG0000001	Lodge	PS_chr01_G000764	Scots	PS_chr02_G009021	1.41e-02	5.12e-04	0.0141
N1.HOG0000001	Lodge	PS_chr01_G000468	Scots	PS_chr03_G013442	1.53e-02	6.25e-04	0.0153
N1.HOG0000001	Lodge	PS_chr01_G000467	Scots	PS_chr01_G000111	2.51e-03	1.63e-02	0.0163
N1.HOG0000001	Lodge	PS_chr09_G038705	Scots	PS_chr01_G000110	1.55e-03	2.14e-02	0.0214
N1.HOG0000001	Lodge	PS_chr01_G000764	Scots	PS_chr02_G008747	2.15e-02	3.23e-08	0.0215
N1.HOG0000001	Lodge	PS_chr01_G000036	Scots	PS_chr01_G000537	1.71e-05	2.18e-02	0.0218
N1.HOG0000001	Lodge	PS_chr09_G038279	Scots	PS_chr01_G000537	9.99e-03	2.53e-02	0.0253
N1.HOG0000001	Lodge	PS_chr01_G000468	Scots	PS_chr02_G006045	2.63e-02	7.24e-05	0.0263
N1.HOG0000001	Lodge	PS_sUP0984_G056879	Scots	PS_chr02_G006048	1.13e-03	2.72e-02	0.0272
N1.HOG0000001	Lodge	PS_chr01_G000468	Scots	PS_chr01_G000035	2.79e-02	6.71e-06	0.0279
N1.HOG0000001	Lodge	PS_chr01_G000036	Scots	PS_chr02_G009021	3.00e-02	9.71e-04	0.03
N1.HOG0000001	Lodge	PS_chr01_G000110	Scots	PS_chr09_G038279	3.07e-02	1.39e-03	0.0307
N1.HOG0000001	Lodge	PS_chr01_G000468	Scots	PS_chr01_G000110	2.53e-02	3.51e-02	0.0351
N1.HOG0000001	Lodge	PS_chr01_G000111	Scots	PS_chr01_G000537	1.80e-06	4.14e-02	0.0414
N1.HOG0000001	Lodge	PS_chr01_G000110	Scots	PS_chr01_G000466	4.14e-02	1.91e-04	0.0414
N1.HOG0000001	Lodge	PS_sUP0984_G056879	Scots	PS_chr01_G000111	2.25e-02	4.24e-02	0.0424
N1.HOG0000001	Lodge	PS_chr01_G000468	Scots	PS_chr02_G007598	3.48e-02	4.25e-02	0.0425
N1.HOG0000001	Lodge	PS_chr09_G038705	Scots	PS_chr01_G000537	3.90e-03	5.36e-02	0.0536
N1.HOG0000001	Lodge	PS_chr01_G000764	Scots	PS_chr02_G006048	1.14e-03	6.05e-02	0.0605
N1.HOG0000001	Lodge	PS_chr01_G000764	Scots	PS_chr09_G038292	3.06e-03	6.42e-02	0.0642
N1.HOG0000001	Lodge	PS_chr09_G038292	Scots	PS_chr01_G000537	6.76e-02	1.23e-02	0.0676
N1.HOG0000001	Lodge	PS_chr01_G000110	Scots	PS_chr09_G038292	6.17e-02	7.68e-02	0.0768
N1.HOG0000001	Lodge	PS_sUP0984_G056879	Scots	PS_sUP0984_G056879	6.72e-03	7.78e-02	0.0778
N1.HOG0000001	Lodge	PS_chr01_G000110	Scots	PS_chr02_G008394	8.02e-02	1.43e-02	0.0802
N1.HOG0000001	Lodge	PS_chr01_G000468	Scots	PS_chr01_G000112	7.45e-02	8.37e-02	0.0837
N1.HOG0000001	Lodge	PS_sUP0984_G056879	Scots	PS_chr01_G000112	8.64e-02	2.96e-02	0.0864
N1.HOG0000001	Lodge	PS_chr01_G000110	Scots	PS_chr01_G005219	9.30e-02	1.25e-03	0.093
N1.HOG0000001	Lodge	PS_sUP0984_G056879	Scots	PS_chr01_G000110	6.32e-02	9.31e-02	0.0931
N1.HOG0000001	Lodge	PS_chr01_G000468	Scots	PS_chr09_G038292	2.88e-03	9.35e-02	0.0935
N1.HOG0000001	Nor	PA_chr01_G000837	Scots	PS_chr01_G000466	9.70e-32	5.03e-32	9.7e-32
N1.HOG0000001	Nor	PA_chr02_G000999	Scots	PS_chr01_G000466	2.19e-35	1.15e-31	1.15e-31
N1.HOG0000001	Nor	PA_chr01_G000837	Scots	PS_chr03_G013442	3.30e-28	1.66e-27	1.66e-27
N1.HOG0000001	Nor	PA_chr01_G000149	Scots	PS_chr01_G000466	3.00e-27	2.86e-27	3e-27
N1.HOG0000001	Nor	PA_chr01_G000723	Scots	PS_chr09_G038279	1.55e-26	1.14e-26	1.55e-26
N1.HOG0000001	Nor	PA_chr01_G000149	Scots	PS_chr03_G013442	2.25e-26	1.07e-26	2.25e-26
N1.HOG0000001	Nor	PA_chr01_G003708	Scots	PS_chr01_G000466	4.14e-29	5.88e-25	5.88e-25
N1.HOG0000001	Nor	PA_chr02_G000999	Scots	PS_chr02_G008747	1.64e-29	7.41e-24	7.41e-24
N1.HOG0000001	Nor	PA_chr02_G000999	Scots	PS_chr03_G013442	1.31e-31	1.53e-23	1.53e-23
N1.HOG0000001	Nor	PA_chr01_G000149	Scots	PS_chr02_G007598	1.07e-27	5.13e-23	5.13e-23
N1.HOG0000001	Nor	PA_chr01_G000837	Scots	PS_chr02_G008747	6.71e-22	3.04e-25	6.71e-22
N1.HOG0000001	Nor	PA_chr01_G003708	Scots	PS_chr02_G008747	2.59e-22	2.28e-21	2.28e-21
N1.HOG0000001	Nor	PA_chr01_G000723	Scots	PS_chr02_G008394	8.16e-22	8.37e-21	8.37e-21
N1.HOG0000001	Nor	PA_chr02_G000992	Scots	PS_chr02_G008747	3.74e-20	3.16e-21	3.74e-20
N1.HOG0000001	Nor	PA_chr01_G000735	Scots	PS_chr03_G013442	1.75e-21	3.83e-20	3.83e-20
N1.HOG0000001	Nor	PA_chr01_G000149	Scots	PS_chr02_G008747	5.87e-20	1.78e-24	5.87e-20
N1.HOG0000001	Nor	PA_chr01_G000837	Scots	PS_chr02_G007598	1.51e-24	1.30e-19	1.3e-19
N1.HOG0000001	Nor	PA_chr02_G000999	Scots	PS_chr09_G038279	2.07e-30	2.19e-19	2.19e-19
N1.HOG0000001	Nor	PA_chr01_G000723	Scots	PS_chr01_G000466	2.49e-19	2.46e-30	2.49e-19
N1.HOG0000001	Nor	PA_chr02_G000999	Scots	PS_chr02_G007598	4.07e-30	3.21e-19	3.21e-19
N1.HOG0000001	Nor	PA_chr01_G000735	Scots	PS_chr01_G000466	3.39e-19	4.02e-20	3.39e-19
N1.HOG0000001	Nor	PA_chr01_G000146	Scots	PS_chr09_G038279	3.75e-20	5.27e-19	5.27e-19
N1.HOG0000001	Nor	PA_chr01_G003708	Scots	PS_chr02_G007598	1.03e-23	6.71e-19	6.71e-19
N1.HOG0000001	Nor	PA_chr01_G003708	Scots	PS_chr09_G038279	5.50e-28	9.57e-19	9.57e-19
N1.HOG0000001	Nor	PA_chr01_G003708	Scots	PS_chr03_G013442	2.32e-26	4.63e-18	4.63e-18
N1.HOG0000001	Nor	PA_chr01_G000735	Scots	PS_chr02_G008747	8.79e-18	5.24e-20	8.79e-18
N1.HOG0000001	Nor	PA_chr01_G000731	Scots	PS_chr01_G000466	3.99e-17	3.80e-21	3.99e-17
N1.HOG0000001	Nor	PA_chr02_G000992	Scots	PS_chr03_G013442	8.00e-20	4.71e-17	4.71e-17
N1.HOG0000001	Nor	PA_chr01_G000731	Scots	PS_chr02_G007598	6.36e-17	8.67e-23	6.36e-17
N1.HOG0000001	Nor	PA_chr02_G000992	Scots	PS_chr01_G000466	1.37e-20	8.21e-17	8.21e-17
N1.HOG0000001	Nor	PA_chr01_G000723	Scots	PS_chr02_G008747	2.43e-16	1.93e-23	2.43e-16
N1.HOG0000001	Nor	PA_chr01_G000723	Scots	PS_chr01_G000467	2.99e-18	3.06e-16	3.06e-16
N1.HOG0000001	Nor	PA_chr01_G000837	Scots	PS_chr09_G038279	2.39e-22	5.67e-16	5.67e-16
N1.HOG0000001	Nor	PA_chr01_G000149	Scots	PS_chr09_G038279	2.47e-21	6.07e-16	6.07e-16
N1.HOG0000001	Nor	PA_chr01_G000731	Scots	PS_chr03_G013442	9.41e-16	2.80e-21	9.41e-16
N1.HOG0000001	Nor	PA_chr02_G000992	Scots	PS_chr02_G007598	2.27e-18	1.34e-15	1.34e-15
N1.HOG0000001	Nor	PA_chr01_G000731	Scots	PS_chr01_G005219	1.41e-15	2.73e-16	1.41e-15
N1.HOG0000001	Nor	PA_chr01_G000731	Scots	PS_chr02_G008747	2.46e-15	3.70e-26	2.46e-15
N1.HOG0000001	Nor	PA_chr01_G000723	Scots	PS_chr02_G006048	2.83e-15	6.34e-16	2.83e-15
N1.HOG0000001	Nor	PA_chr01_G000146	Scots	PS_chr01_G000467	2.99e-17	3.65e-15	3.65e-15
N1.HOG0000001	Nor	PA_chr01_G000731	Scots	PS_chr01_G000112	1.39e-16	5.44e-15	5.44e-15
N1.HOG0000001	Nor	PA_chr02_G000999	Scots	PS_chr01_G000467	1.43e-32	1.12e-14	1.12e-14
N1.HOG0000001	Nor	PA_chr01_G000731	Scots	PS_chr02_G008394	1.81e-16	9.03e-14	9.03e-14
N1.HOG0000001	Nor	PA_chr02_G000999	Scots	PS_chr02_G008394	1.74e-29	1.09e-13	1.09e-13
N1.HOG0000001	Nor	PA_chr01_G000723	Scots	PS_chr02_G006045	1.49e-13	6.57e-14	1.49e-13
N1.HOG0000001	Nor	PA_chr01_G000146	Scots	PS_chr02_G008394	4.13e-15	1.95e-13	1.95e-13
N1.HOG0000001	Nor	PA_chr01_G000146	Scots	PS_chr02_G008747	2.09e-13	3.15e-23	2.09e-13
N1.HOG0000001	Nor	PA_chr01_G003708	Scots	PS_chr01_G000467	3.83e-28	3.31e-13	3.31e-13
N1.HOG0000001	Nor	PA_chr01_G000837	Scots	PS_chr02_G006048	1.19e-20	4.20e-13	4.2e-13
N1.HOG0000001	Nor	PA_chr02_G000992	Scots	PS_chr09_G038279	1.08e-15	4.27e-13	4.27e-13
N1.HOG0000001	Nor	PA_chr01_G000149	Scots	PS_chr02_G008394	1.29e-23	7.62e-13	7.62e-13
N1.HOG0000001	Nor	PA_chr01_G000723	Scots	PS_chr01_G000112	3.96e-14	8.78e-13	8.78e-13
N1.HOG0000001	Nor	PA_chr01_G000146	Scots	PS_chr01_G000466	1.01e-12	6.14e-24	1.01e-12
N1.HOG0000001	Nor	PA_chr01_G000735	Scots	PS_chr02_G007598	4.22e-14	1.26e-12	1.26e-12
N1.HOG0000001	Nor	PA_chr01_G000149	Scots	PS_chr01_G000467	3.13e-18	2.33e-12	2.33e-12
N1.HOG0000001	Nor	PA_chr01_G000793	Scots	PS_chr01_G000466	2.82e-12	2.48e-24	2.82e-12
N1.HOG0000001	Nor	PA_chr01_G000837	Scots	PS_chr01_G000467	2.89e-21	2.83e-12	2.83e-12
N1.HOG0000001	Nor	PA_chr01_G000147	Scots	PS_chr09_G038279	4.12e-12	9.39e-16	4.12e-12
N1.HOG0000001	Nor	PA_chr01_G003708	Scots	PS_chr01_G005219	1.46e-17	5.45e-12	5.45e-12
N1.HOG0000001	Nor	PA_chr01_G000723	Scots	PS_chr03_G013442	4.31e-13	5.56e-12	5.56e-12
N1.HOG0000001	Nor	PA_chr01_G000731	Scots	PS_chr01_G000467	6.49e-12	8.82e-13	6.49e-12
N1.HOG0000001	Nor	PA_chr01_G000837	Scots	PS_chr02_G008394	8.37e-23	6.71e-12	6.71e-12
N1.HOG0000001	Nor	PA_chr01_G000147	Scots	PS_chr02_G008394	1.00e-13	8.84e-12	8.84e-12
N1.HOG0000001	Nor	PA_chr01_G000147	Scots	PS_chr01_G005219	1.32e-11	3.88e-14	1.32e-11
N1.HOG0000001	Nor	PA_chr01_G000146	Scots	PS_chr02_G006045	2.17e-12	1.33e-11	1.33e-11
N1.HOG0000001	Nor	PA_chr01_G000731	Scots	PS_chr02_G006048	2.47e-12	2.99e-11	2.99e-11
N1.HOG0000001	Nor	PA_chr01_G000723	Scots	PS_chr02_G007598	9.93e-12	3.77e-11	3.77e-11
N1.HOG0000001	Nor	PA_chr01_G000735	Scots	PS_chr01_G000467	1.31e-16	4.17e-11	4.17e-11
N1.HOG0000001	Nor	PA_chr01_G000735	Scots	PS_chr09_G038279	1.01e-13	4.17e-11	4.17e-11
N1.HOG0000001	Nor	PA_chr02_G000999	Scots	PS_chr01_G000112	6.37e-21	4.90e-11	4.9e-11
N1.HOG0000001	Nor	PA_chr01_G000731	Scots	PS_chr09_G038279	5.14e-11	2.55e-14	5.14e-11
N1.HOG0000001	Nor	PA_chr01_G000146	Scots	PS_chr01_G000468	1.56e-12	7.03e-11	7.03e-11
N1.HOG0000001	Nor	PA_chr02_G000992	Scots	PS_chr01_G000467	5.60e-15	1.18e-10	1.18e-10
N1.HOG0000001	Nor	PA_chr01_G000837	Scots	PS_chr01_G000468	1.17e-17	1.31e-10	1.31e-10
N1.HOG0000001	Nor	PA_chr01_G000146	Scots	PS_chr03_G013442	2.13e-10	1.24e-12	2.13e-10
N1.HOG0000001	Nor	PA_chr01_G000147	Scots	PS_chr02_G008747	2.71e-10	1.56e-18	2.71e-10
N1.HOG0000001	Nor	PA_chr01_G000149	Scots	PS_chr02_G006048	1.03e-16	3.98e-10	3.98e-10
N1.HOG0000001	Nor	PA_chr01_G000731	Scots	PS_chr02_G006045	2.53e-14	4.92e-10	4.92e-10
N1.HOG0000001	Nor	PA_chr01_G000723	Scots	PS_chr01_G000468	1.26e-11	6.02e-10	6.02e-10
N1.HOG0000001	Nor	PA_chr01_G000149	Scots	PS_chr02_G009021	1.77e-14	6.59e-10	6.59e-10
N1.HOG0000001	Nor	PA_chr01_G003708	Scots	PS_chr02_G006048	4.46e-16	6.95e-10	6.95e-10
N1.HOG0000001	Nor	PA_chr01_G000147	Scots	PS_chr02_G007598	8.25e-10	3.93e-12	8.25e-10
N1.HOG0000001	Nor	PA_chr01_G000146	Scots	PS_chr02_G006048	1.40e-10	9.18e-10	9.18e-10
N1.HOG0000001	Nor	PA_chr01_G000793	Scots	PS_chr02_G008747	1.33e-09	9.20e-22	1.33e-09
N1.HOG0000001	Nor	PA_chr01_G003708	Scots	PS_chr02_G008394	1.07e-21	1.57e-09	1.57e-09
N1.HOG0000001	Nor	PA_chr01_G000723	Scots	PS_chr01_G000111	3.09e-13	1.60e-09	1.6e-09
N1.HOG0000001	Nor	PA_chr09_G001707	Scots	PS_chr02_G008747	2.07e-09	1.44e-18	2.07e-09
N1.HOG0000001	Nor	PA_chr02_G000999	Scots	PS_chr02_G009021	4.68e-13	2.96e-09	2.96e-09
N1.HOG0000001	Nor	PA_chr02_G000992	Scots	PS_chr02_G008394	6.84e-17	3.36e-09	3.36e-09
N1.HOG0000001	Nor	PA_chr01_G000146	Scots	PS_chr01_G000035	1.06e-12	3.46e-09	3.46e-09
N1.HOG0000001	Nor	PA_chr02_G000992	Scots	PS_chr02_G009021	4.09e-14	3.68e-09	3.68e-09
N1.HOG0000001	Nor	PA_chr02_G000999	Scots	PS_chr01_G005219	3.09e-19	3.76e-09	3.76e-09
N1.HOG0000001	Nor	PA_chr01_G000147	Scots	PS_chr03_G013442	4.06e-09	1.50e-10	4.06e-09
N1.HOG0000001	Nor	PA_chr02_G000999	Scots	PS_chr02_G006045	2.70e-18	4.87e-09	4.87e-09
N1.HOG0000001	Nor	PA_chr01_G000149	Scots	PS_chr01_G000468	3.66e-14	6.56e-09	6.56e-09
N1.HOG0000001	Nor	PA_chr01_G000723	Scots	PS_chr01_G000035	8.77e-12	7.07e-09	7.07e-09
N1.HOG0000001	Nor	PA_chr01_G000793	Scots	PS_chr02_G006045	7.17e-09	2.51e-12	7.17e-09
N1.HOG0000001	Nor	PA_chr02_G000992	Scots	PS_chr02_G006048	7.01e-13	9.26e-09	9.26e-09
N1.HOG0000001	Nor	PA_chr01_G000837	Scots	PS_chr01_G005219	2.92e-12	9.51e-09	9.51e-09
N1.HOG0000001	Nor	PA_chr01_G000147	Scots	PS_chr01_G000466	1.02e-08	6.90e-13	1.02e-08
N1.HOG0000001	Nor	PA_chr02_G000992	Scots	PS_chr01_G005219	3.26e-13	1.55e-08	1.55e-08
N1.HOG0000001	Nor	PA_chr01_G000146	Scots	PS_chr02_G007598	8.22e-09	1.58e-08	1.58e-08
N1.HOG0000001	Nor	PA_chr02_G000999	Scots	PS_chr01_G000468	1.00e-13	1.63e-08	1.63e-08
N1.HOG0000001	Nor	PA_chr01_G000735	Scots	PS_chr02_G008394	7.32e-14	1.72e-08	1.72e-08
N1.HOG0000001	Nor	PA_chr01_G000147	Scots	PS_chr01_G000112	1.79e-08	1.84e-09	1.79e-08
N1.HOG0000001	Nor	PA_chr02_G000999	Scots	PS_chr02_G006048	9.60e-17	1.90e-08	1.9e-08
N1.HOG0000001	Nor	PA_chr01_G003708	Scots	PS_chr02_G009021	1.04e-10	1.98e-08	1.98e-08
N1.HOG0000001	Nor	PA_chr01_G000837	Scots	PS_chr02_G006045	2.57e-15	2.20e-08	2.2e-08
N1.HOG0000001	Nor	PA_chr02_G000999	Scots	PS_sUP0984_G056879	2.44e-15	2.78e-08	2.78e-08
N1.HOG0000001	Nor	PA_chr01_G000793	Scots	PS_chr02_G008394	4.13e-08	2.19e-11	4.13e-08
N1.HOG0000001	Nor	PA_chr01_G000839	Scots	PS_chr02_G006045	4.65e-08	1.21e-09	4.65e-08
N1.HOG0000001	Nor	PA_chr09_G001707	Scots	PS_chr01_G000467	7.69e-11	6.94e-08	6.94e-08
N1.HOG0000001	Nor	PA_chr01_G000837	Scots	PS_chr01_G000112	1.61e-14	7.80e-08	7.8e-08
N1.HOG0000001	Nor	PA_chr01_G000723	Scots	PS_chr01_G005219	8.79e-08	3.56e-09	8.79e-08
N1.HOG0000001	Nor	PA_chr01_G000793	Scots	PS_chr09_G038279	9.25e-08	1.67e-11	9.25e-08
N1.HOG0000001	Nor	PA_chr01_G003708	Scots	PS_sUP0984_G056879	6.75e-17	1.02e-07	1.02e-07
N1.HOG0000001	Nor	PA_chr09_G001707	Scots	PS_chr09_G038279	1.58e-09	1.13e-07	1.13e-07
N1.HOG0000001	Nor	PA_chr01_G000793	Scots	PS_chr02_G006048	1.26e-07	1.67e-12	1.26e-07
N1.HOG0000001	Nor	PA_chr02_G003920	Scots	PS_chr01_G005219	2.93e-07	6.18e-13	2.93e-07
N1.HOG0000001	Nor	PA_chr02_G000999	Scots	PS_chr01_G000035	1.21e-20	3.23e-07	3.23e-07
N1.HOG0000001	Nor	PA_chr01_G000735	Scots	PS_chr02_G009021	8.96e-08	3.60e-07	3.6e-07
N1.HOG0000001	Nor	PA_chr01_G000147	Scots	PS_chr02_G006045	3.65e-07	6.77e-07	6.77e-07
N1.HOG0000001	Nor	PA_chr01_G000793	Scots	PS_chr03_G013442	8.28e-07	2.53e-11	8.28e-07
N1.HOG0000001	Nor	PA_chr01_G003708	Scots	PS_chr02_G006045	3.56e-16	9.44e-07	9.44e-07
N1.HOG0000001	Nor	PA_chr01_G003708	Scots	PS_chr01_G000035	2.20e-19	1.62e-06	1.62e-06
N1.HOG0000001	Nor	PA_chr01_G003708	Scots	PS_chr01_G000468	2.10e-14	1.92e-06	1.92e-06
N1.HOG0000001	Nor	PA_chr01_G000735	Scots	PS_chr02_G006048	8.41e-10	1.97e-06	1.97e-06
N1.HOG0000001	Nor	PA_chr01_G000147	Scots	PS_chr01_G000467	2.06e-06	1.14e-08	2.06e-06
N1.HOG0000001	Nor	PA_chr01_G000837	Scots	PS_chr02_G009021	1.41e-06	2.19e-06	2.19e-06
N1.HOG0000001	Nor	PA_chr01_G000839	Scots	PS_chr01_G000112	2.77e-06	1.05e-06	2.77e-06
N1.HOG0000001	Nor	PA_chr01_G000146	Scots	PS_chr01_G000112	4.04e-10	2.93e-06	2.93e-06
N1.HOG0000001	Nor	PA_chr01_G003708	Scots	PS_chr01_G000112	2.46e-15	3.03e-06	3.03e-06
N1.HOG0000001	Nor	PA_chr01_G000793	Scots	PS_chr01_G000467	3.26e-06	3.07e-10	3.26e-06
N1.HOG0000001	Nor	PA_chr01_G000731	Scots	PS_chr01_G000468	3.28e-06	2.19e-06	3.28e-06
N1.HOG0000001	Nor	PA_chr02_G003920	Scots	PS_chr03_G013442	4.14e-06	3.60e-14	4.14e-06
N1.HOG0000001	Nor	PA_chr01_G000792	Scots	PS_chr01_G000466	4.93e-06	5.24e-12	4.93e-06
N1.HOG0000001	Nor	PA_chr01_G000735	Scots	PS_chr01_G000468	4.94e-06	4.16e-06	4.94e-06
N1.HOG0000001	Nor	PA_chr01_G000149	Scots	PS_chr02_G006045	3.67e-11	5.24e-06	5.24e-06
N1.HOG0000001	Nor	PA_chr01_G000839	Scots	PS_chr02_G007598	5.26e-06	2.56e-08	5.26e-06
N1.HOG0000001	Nor	PA_chr09_G001707	Scots	PS_chr03_G013442	5.97e-06	8.02e-09	5.97e-06
N1.HOG0000001	Nor	PA_chr01_G000735	Scots	PS_chr01_G000035	2.68e-08	6.29e-06	6.29e-06
N1.HOG0000001	Nor	PA_chr01_G000793	Scots	PS_chr09_G038292	8.66e-06	5.70e-06	8.66e-06
N1.HOG0000001	Nor	PA_chr01_G003708	Scots	PS_chr09_G038292	4.00e-17	1.04e-05	1.04e-05
N1.HOG0000001	Nor	PA_chr01_G000731	Scots	PS_chr02_G009021	1.09e-05	2.24e-06	1.09e-05
N1.HOG0000001	Nor	PA_chr01_G000793	Scots	PS_chr02_G007598	1.33e-05	2.83e-12	1.33e-05
N1.HOG0000001	Nor	PA_chr01_G000149	Scots	PS_chr01_G005219	9.46e-10	1.42e-05	1.42e-05
N1.HOG0000001	Nor	PA_chr01_G000146	Scots	PS_chr01_G000111	5.84e-10	1.56e-05	1.56e-05
N1.HOG0000001	Nor	PA_chr09_G001707	Scots	PS_chr02_G009021	1.80e-05	2.91e-07	1.8e-05
N1.HOG0000001	Nor	PA_chr01_G000147	Scots	PS_chr02_G006048	1.81e-05	3.20e-07	1.81e-05
N1.HOG0000001	Nor	PA_chr01_G000793	Scots	PS_chr01_G000112	2.29e-05	1.59e-06	2.29e-05
N1.HOG0000001	Nor	PA_chr01_G000839	Scots	PS_chr02_G008394	2.49e-05	5.01e-07	2.49e-05
N1.HOG0000001	Nor	PA_chr01_G000793	Scots	PS_chr01_G000035	3.14e-05	1.27e-07	3.14e-05
N1.HOG0000001	Nor	PA_chr02_G000992	Scots	PS_chr01_G000035	5.11e-10	3.23e-05	3.23e-05
N1.HOG0000001	Nor	PA_chr01_G000792	Scots	PS_chr02_G007598	3.42e-05	9.60e-11	3.42e-05
N1.HOG0000001	Nor	PA_chr01_G000149	Scots	PS_sUP0984_G056879	1.21e-09	3.45e-05	3.45e-05
N1.HOG0000001	Nor	PA_chr02_G003920	Scots	PS_chr09_G038279	3.52e-05	2.03e-13	3.52e-05
N1.HOG0000001	Nor	PA_chr02_G003920	Scots	PS_chr02_G006048	3.60e-05	4.58e-11	3.6e-05
N1.HOG0000001	Nor	PA_chr01_G000839	Scots	PS_chr01_G000466	3.64e-05	6.35e-10	3.64e-05
N1.HOG0000001	Nor	PA_chr01_G000735	Scots	PS_chr01_G005219	1.72e-08	4.12e-05	4.12e-05
N1.HOG0000001	Nor	PA_chr01_G000792	Scots	PS_chr01_G005219	4.41e-05	2.53e-07	4.41e-05
N1.HOG0000001	Nor	PA_chr09_G001707	Scots	PS_chr01_G000466	4.42e-05	1.92e-08	4.42e-05
N1.HOG0000001	Nor	PA_chr01_G000147	Scots	PS_chr01_G000035	3.61e-06	6.16e-05	6.16e-05
N1.HOG0000001	Nor	PA_chr02_G003920	Scots	PS_chr01_G000466	6.21e-05	6.46e-15	6.21e-05
N1.HOG0000001	Nor	PA_chr01_G000792	Scots	PS_chr02_G008394	6.49e-05	1.52e-05	6.49e-05
N1.HOG0000001	Nor	PA_chr09_G001707	Scots	PS_chr02_G006048	3.57e-08	6.79e-05	6.79e-05
N1.HOG0000001	Nor	PA_chr01_G000837	Scots	PS_chr01_G000035	2.21e-14	9.02e-05	9.02e-05
N1.HOG0000001	Nor	PA_chr01_G000723	Scots	PS_sUP0984_G056879	2.46e-06	9.49e-05	9.49e-05
N1.HOG0000001	Nor	PA_chr01_G000837	Scots	PS_sUP0984_G056879	3.78e-07	1.00e-04	0.0001
N1.HOG0000001	Nor	PA_chr01_G000732	Scots	PS_chr09_G038279	1.00e-04	2.38e-09	0.0001
N1.HOG0000001	Nor	PA_chr02_G003920	Scots	PS_chr02_G007598	1.20e-04	1.35e-14	0.00012
N1.HOG0000001	Nor	PA_chr02_G003920	Scots	PS_chr02_G008394	1.48e-04	4.17e-09	0.000148
N1.HOG0000001	Nor	PA_chr01_G000793	Scots	PS_chr01_G000468	1.51e-04	8.78e-08	0.000151
N1.HOG0000001	Nor	PA_chr01_G000149	Scots	PS_chr01_G000112	9.80e-08	1.59e-04	0.000159
N1.HOG0000001	Nor	PA_chr01_G000792	Scots	PS_chr02_G006048	1.69e-04	7.56e-06	0.000169
N1.HOG0000001	Nor	PA_chr01_G003708	Scots	PS_chr01_G000111	5.80e-13	1.91e-04	0.000191
N1.HOG0000001	Nor	PA_chr02_G000992	Scots	PS_chr01_G000764	1.74e-06	1.92e-04	0.000192
N1.HOG0000001	Nor	PA_chr01_G000723	Scots	PS_chr09_G038292	2.87e-13	1.94e-04	0.000194
N1.HOG0000001	Nor	PA_chr02_G000992	Scots	PS_chr01_G000112	3.95e-08	2.02e-04	0.000202
N1.HOG0000001	Nor	PA_chr01_G000731	Scots	PS_chr09_G038292	1.46e-06	2.21e-04	0.000221
N1.HOG0000001	Nor	PA_chr01_G000146	Scots	PS_chr01_G000537	6.85e-06	2.54e-04	0.000254
N1.HOG0000001	Nor	PA_chr01_G000731	Scots	PS_chr01_G000111	5.60e-06	2.58e-04	0.000258
N1.HOG0000001	Nor	PA_chr01_G000149	Scots	PS_chr01_G000035	5.18e-13	2.76e-04	0.000276
N1.HOG0000001	Nor	PA_chr02_G000992	Scots	PS_chr09_G038292	1.08e-08	2.86e-04	0.000286
N1.HOG0000001	Nor	PA_chr01_G000147	Scots	PS_chr09_G038292	1.97e-09	2.90e-04	0.00029
N1.HOG0000001	Nor	PA_chr01_G000839	Scots	PS_chr01_G005219	3.33e-04	1.62e-05	0.000333
N1.HOG0000001	Nor	PA_chr02_G003920	Scots	PS_chr02_G006045	3.82e-04	6.98e-06	0.000382
N1.HOG0000001	Nor	PA_chr09_G001707	Scots	PS_chr02_G008394	1.49e-07	4.86e-04	0.000486
N1.HOG0000001	Nor	PA_chr01_G000792	Scots	PS_sUP0984_G056879	5.25e-04	2.49e-05	0.000525
N1.HOG0000001	Nor	PA_chr02_G003920	Scots	PS_chr01_G000112	5.38e-04	5.36e-05	0.000538
N1.HOG0000001	Nor	PA_chr01_G000792	Scots	PS_chr03_G013442	5.63e-04	3.43e-09	0.000563
N1.HOG0000001	Nor	PA_chr01_G000839	Scots	PS_chr03_G013442	6.52e-04	1.36e-06	0.000652
N1.HOG0000001	Nor	PA_chr01_G000731	Scots	PS_chr01_G000035	1.10e-04	7.29e-04	0.000729
N1.HOG0000001	Nor	PA_chr02_G000992	Scots	PS_chr01_G000468	3.04e-05	9.18e-04	0.000918
N1.HOG0000001	Nor	PA_chr02_G003920	Scots	PS_chr02_G008747	1.01e-03	4.62e-18	0.00101
N1.HOG0000001	Nor	PA_chr01_G000146	Scots	PS_chr01_G005219	5.97e-04	1.18e-03	0.00118
N1.HOG0000001	Nor	PA_chr01_G000793	Scots	PS_chr01_G000111	3.20e-04	1.44e-03	0.00144
N1.HOG0000001	Nor	PA_chr01_G000735	Scots	PS_chr01_G000112	1.12e-07	1.46e-03	0.00146
N1.HOG0000001	Nor	PA_chr09_G001707	Scots	PS_chr02_G007598	1.43e-03	1.55e-03	0.00155
N1.HOG0000001	Nor	PA_chr01_G000732	Scots	PS_chr02_G008747	1.64e-03	8.87e-10	0.00164
N1.HOG0000001	Nor	PA_chr02_G003920	Scots	PS_chr09_G038292	1.65e-03	1.89e-05	0.00165
N1.HOG0000001	Nor	PA_chr01_G000732	Scots	PS_chr09_G038292	1.15e-03	2.14e-03	0.00214
N1.HOG0000001	Nor	PA_chr02_G000999	Scots	PS_chr09_G038292	5.09e-16	2.16e-03	0.00216
N1.HOG0000001	Nor	PA_chr02_G003920	Scots	PS_chr01_G000467	2.18e-03	2.54e-09	0.00218
N1.HOG0000001	Nor	PA_chr01_G000792	Scots	PS_chr09_G038292	2.27e-03	4.22e-05	0.00227
N1.HOG0000001	Nor	PA_chr01_G000839	Scots	PS_chr02_G006048	2.51e-03	4.14e-06	0.00251
N1.HOG0000001	Nor	PA_chr02_G000999	Scots	PS_chr01_G000111	2.44e-12	2.75e-03	0.00275
N1.HOG0000001	Nor	PA_chr01_G000793	Scots	PS_chr01_G005219	2.81e-03	6.41e-08	0.00281
N1.HOG0000001	Nor	PA_chr01_G000732	Scots	PS_chr01_G000035	2.85e-03	2.24e-04	0.00285
N1.HOG0000001	Nor	PA_chr01_G000839	Scots	PS_chr02_G008747	2.98e-03	5.27e-10	0.00298
N1.HOG0000001	Nor	PA_chr01_G000147	Scots	PS_chr01_G000468	3.10e-03	8.65e-05	0.0031
N1.HOG0000001	Nor	PA_chr01_G000839	Scots	PS_chr02_G009021	3.52e-03	3.89e-04	0.00352
N1.HOG0000001	Nor	PA_chr01_G000723	Scots	PS_chr01_G000537	1.78e-04	3.53e-03	0.00353
N1.HOG0000001	Nor	PA_chr01_G000735	Scots	PS_sUP0984_G056879	6.10e-07	3.82e-03	0.00382
N1.HOG0000001	Nor	PA_chr01_G000146	Scots	PS_sUP0984_G056879	2.53e-04	3.94e-03	0.00394
N1.HOG0000001	Nor	PA_chr01_G000837	Scots	PS_chr09_G038292	1.34e-11	4.51e-03	0.00451
N1.HOG0000001	Nor	PA_chr02_G000992	Scots	PS_sUP0984_G056879	2.96e-09	4.63e-03	0.00463
N1.HOG0000001	Nor	PA_chr01_G000792	Scots	PS_chr02_G008747	4.68e-03	1.83e-09	0.00468
N1.HOG0000001	Nor	PA_chr01_G000792	Scots	PS_chr01_G000467	5.07e-03	1.71e-05	0.00507
N1.HOG0000001	Nor	PA_chr02_G003920	Scots	PS_chr01_G000035	5.17e-03	5.49e-05	0.00517
N1.HOG0000001	Nor	PA_chr01_G000732	Scots	PS_chr02_G006048	5.39e-03	3.69e-07	0.00539
N1.HOG0000001	Nor	PA_chr01_G000048	Scots	PS_sUP0984_G056879	5.71e-03	1.09e-03	0.00571
N1.HOG0000001	Nor	PA_chr01_G000732	Scots	PS_chr02_G008394	5.95e-03	5.81e-07	0.00595
N1.HOG0000001	Nor	PA_chr01_G000839	Scots	PS_chr09_G038279	6.09e-03	3.85e-06	0.00609
N1.HOG0000001	Nor	PA_chr01_G000147	Scots	PS_chr01_G000111	9.49e-04	6.11e-03	0.00611
N1.HOG0000001	Nor	PA_chr01_G000147	Scots	PS_chr02_G009021	6.71e-03	1.83e-04	0.00671
N1.HOG0000001	Nor	PA_chr02_G000992	Scots	PS_chr02_G006045	3.64e-09	7.10e-03	0.0071
N1.HOG0000001	Nor	PA_chr01_G003708	Scots	PS_chr01_G000537	6.49e-10	7.31e-03	0.00731
N1.HOG0000001	Nor	PA_chr01_G000735	Scots	PS_chr02_G006045	1.08e-05	9.60e-03	0.0096
N1.HOG0000001	Nor	PA_chr02_G003920	Scots	PS_chr01_G000537	9.61e-03	4.43e-03	0.00961
N1.HOG0000001	Nor	PA_chr01_G000146	Scots	PS_chr02_G009021	9.85e-03	1.37e-03	0.00985
N1.HOG0000001	Nor	PA_chr01_G000147	Scots	PS_chr01_G000764	7.45e-03	1.07e-02	0.0107
N1.HOG0000001	Nor	PA_chr01_G000731	Scots	PS_sUP0984_G056879	1.58e-04	1.16e-02	0.0116
N1.HOG0000001	Nor	PA_chr01_G000839	Scots	PS_chr01_G000110	6.90e-04	1.17e-02	0.0117
N1.HOG0000001	Nor	PA_chr01_G000792	Scots	PS_chr02_G006045	4.03e-03	1.25e-02	0.0125
N1.HOG0000001	Nor	PA_chr01_G000793	Scots	PS_chr01_G000537	9.66e-04	1.31e-02	0.0131
N1.HOG0000001	Nor	PA_chr01_G000839	Scots	PS_chr01_G000537	8.48e-03	1.51e-02	0.0151
N1.HOG0000001	Nor	PA_chr01_G000149	Scots	PS_chr09_G038292	9.64e-09	1.57e-02	0.0157
N1.HOG0000001	Nor	PA_chr01_G000735	Scots	PS_chr09_G038292	1.23e-06	1.76e-02	0.0176
N1.HOG0000001	Nor	PA_chr01_G000723	Scots	PS_chr02_G009021	1.80e-02	4.73e-03	0.018
N1.HOG0000001	Nor	PA_chr01_G000732	Scots	PS_chr01_G005219	1.82e-02	3.42e-04	0.0182
N1.HOG0000001	Nor	PA_chr01_G000146	Scots	PS_chr09_G038292	1.63e-10	1.85e-02	0.0185
N1.HOG0000001	Nor	PA_chr09_G001707	Scots	PS_chr01_G000035	4.51e-04	2.10e-02	0.021
N1.HOG0000001	Nor	PA_chr01_G000732	Scots	PS_chr01_G000112	2.15e-02	1.72e-04	0.0215
N1.HOG0000001	Nor	PA_chr01_G000793	Scots	PS_sUP0984_G056879	2.23e-02	1.28e-02	0.0223
N1.HOG0000001	Nor	PA_chr01_G000792	Scots	PS_chr01_G000468	2.34e-02	7.39e-05	0.0234
N1.HOG0000001	Nor	PA_chr02_G003920	Scots	PS_sUP0984_G056879	2.60e-02	2.54e-04	0.026
N1.HOG0000001	Nor	PA_chr01_G000732	Scots	PS_chr03_G013442	2.78e-02	8.69e-06	0.0278
N1.HOG0000001	Nor	PA_chr02_G000999	Scots	PS_chr01_G000537	2.32e-08	3.05e-02	0.0305
N1.HOG0000001	Nor	PA_chr01_G000839	Scots	PS_chr01_G000467	3.09e-02	8.83e-05	0.0309
N1.HOG0000001	Nor	PA_chr01_G000149	Scots	PS_chr01_G000764	6.68e-03	3.28e-02	0.0328
N1.HOG0000001	Nor	PA_chr01_G000731	Scots	PS_chr01_G000537	2.64e-05	3.46e-02	0.0346
N1.HOG0000001	Nor	PA_chr01_G000732	Scots	PS_chr02_G007598	3.53e-02	4.45e-05	0.0353
N1.HOG0000001	Nor	PA_chr01_G000792	Scots	PS_chr09_G038279	3.59e-02	5.41e-06	0.0359
N1.HOG0000001	Nor	PA_chr01_G000839	Scots	PS_chr01_G000468	3.86e-02	6.43e-04	0.0386
N1.HOG0000001	Nor	PA_chr02_G003920	Scots	PS_chr01_G000468	3.96e-02	1.74e-04	0.0396
N1.HOG0000001	Nor	PA_chr01_G000792	Scots	PS_chr02_G009021	4.10e-02	1.00e-03	0.041
N1.HOG0000001	Nor	PA_chr01_G000732	Scots	PS_chr01_G000466	5.02e-02	9.51e-08	0.0502
N1.HOG0000001	Nor	PA_chr01_G000837	Scots	PS_chr01_G000111	2.70e-07	5.37e-02	0.0537
N1.HOG0000001	Nor	PA_chr02_G003920	Scots	PS_chr01_G000111	5.43e-02	7.80e-03	0.0543
N1.HOG0000001	Nor	PA_chr09_G001707	Scots	PS_sUP0984_G056879	2.31e-03	5.55e-02	0.0555
N1.HOG0000001	Nor	PA_chr01_G000839	Scots	PS_chr01_G000111	6.30e-02	8.56e-03	0.063
N1.HOG0000001	Nor	PA_chr01_G000723	Scots	PS_chr01_G000110	5.72e-06	7.92e-02	0.0792
N1.HOG0000001	Nor	PA_chr02_G003920	Scots	PS_chr02_G009021	8.00e-02	4.64e-05	0.08
N1.HOG0000001	Nor	PA_chr09_G001707	Scots	PS_chr01_G000468	8.43e-02	2.37e-02	0.0843
N1.HOG0000001	Nor	PA_chr01_G000149	Scots	PS_chr01_G000111	1.04e-06	9.42e-02	0.0942
N1.HOG0000002	Lodge	PS_chr08_G033705	Scots	PS_chr08_G033705	1.08e-02	6.40e-04	0.0108
N1.HOG0000003	Lodge	PS_chr09_G037691	Nor	PA_chr07_G004123	1.43e-35	1.66e-32	1.66e-32
N1.HOG0000003	Lodge	PS_chr12_G050780	Nor	PA_chr07_G004123	9.71e-31	6.42e-36	9.71e-31
N1.HOG0000003	Lodge	PS_chr12_G050780	Nor	PA_chr07_G001855	1.54e-32	1.04e-30	1.04e-30
N1.HOG0000003	Lodge	PS_chr04_G015738	Nor	PA_chr07_G004123	6.35e-30	4.25e-34	6.35e-30
N1.HOG0000003	Lodge	PS_chr04_G015738	Nor	PA_chr07_G001855	2.67e-33	3.54e-29	3.54e-29
N1.HOG0000003	Lodge	PS_chr06_G024331	Nor	PA_chr07_G004123	1.53e-26	2.18e-35	1.53e-26
N1.HOG0000003	Lodge	PS_chr04_G015738	Nor	PA_chr10_G002024	5.84e-34	5.88e-25	5.88e-25
N1.HOG0000003	Lodge	PS_chr12_G050780	Nor	PA_chr10_G002024	2.22e-31	4.11e-24	4.11e-24
N1.HOG0000003	Lodge	PS_chr06_G024331	Nor	PA_chr10_G002024	3.83e-23	1.62e-22	1.62e-22
N1.HOG0000003	Lodge	PS_chr06_G024331	Nor	PA_chr07_G001855	3.02e-22	5.18e-25	3.02e-22
N1.HOG0000003	Lodge	PS_chr09_G037691	Nor	PA_chr07_G001855	6.57e-28	1.92e-20	1.92e-20
N1.HOG0000003	Lodge	PS_chr12_G050780	Nor	PA_chr10_G001122	2.78e-24	1.21e-19	1.21e-19
N1.HOG0000003	Lodge	PS_chr05_G021617	Nor	PA_chr07_G004127	3.87e-19	8.85e-20	3.87e-19
N1.HOG0000003	Lodge	PS_chr06_G024331	Nor	PA_chr10_G001122	1.87e-20	7.47e-18	7.47e-18
N1.HOG0000003	Lodge	PS_chr05_G021617	Nor	PA_chr10_G001122	1.36e-17	1.51e-21	1.36e-17
N1.HOG0000003	Lodge	PS_chr09_G037691	Nor	PA_chr10_G002024	4.19e-26	5.15e-17	5.15e-17
N1.HOG0000003	Lodge	PS_chr04_G015738	Nor	PA_chr11_G000133	1.85e-27	5.75e-17	5.75e-17
N1.HOG0000003	Lodge	PS_chr05_G021617	Nor	PA_chr07_G001855	6.87e-17	1.61e-23	6.87e-17
N1.HOG0000003	Lodge	PS_chr12_G050780	Nor	PA_chr07_G004127	1.51e-25	8.04e-17	8.04e-17
N1.HOG0000003	Lodge	PS_chr12_G050780	Nor	PA_chr11_G000133	4.06e-30	4.90e-16	4.9e-16
N1.HOG0000003	Lodge	PS_chr04_G015738	Nor	PA_chr10_G001122	1.06e-18	1.32e-15	1.32e-15
N1.HOG0000003	Lodge	PS_chr10_G041868	Nor	PA_chr07_G001855	1.96e-15	2.69e-18	1.96e-15
N1.HOG0000003	Lodge	PS_chr05_G021617	Nor	PA_chr10_G001113	7.50e-15	7.68e-18	7.5e-15
N1.HOG0000003	Lodge	PS_chr07_G030691	Nor	PA_chr04_G001602	1.09e-16	1.71e-14	1.71e-14
N1.HOG0000003	Lodge	PS_chr05_G021617	Nor	PA_chr11_G000133	5.40e-14	1.54e-14	5.4e-14
N1.HOG0000003	Lodge	PS_chr10_G041868	Nor	PA_chr07_G004123	5.66e-14	1.14e-24	5.66e-14
N1.HOG0000003	Lodge	PS_chr07_G030691	Nor	PA_chr11_G000133	6.04e-14	5.72e-14	6.04e-14
N1.HOG0000003	Lodge	PS_chr04_G015738	Nor	PA_chr04_G001602	1.40e-20	7.07e-14	7.07e-14
N1.HOG0000003	Lodge	PS_chr04_G015738	Nor	PA_chr10_G001113	2.56e-21	1.01e-13	1.01e-13
N1.HOG0000003	Lodge	PS_chr05_G021617	Nor	PA_chr07_G004123	1.16e-13	1.26e-26	1.16e-13
N1.HOG0000003	Lodge	PS_chr01_G001415	Nor	PA_chr07_G001855	1.31e-13	2.35e-22	1.31e-13
N1.HOG0000003	Lodge	PS_chr12_G049656	Nor	PA_chr10_G002024	2.21e-13	2.03e-14	2.21e-13
N1.HOG0000003	Lodge	PS_chr05_G021617	Nor	PA_chr04_G001602	1.45e-17	2.32e-13	2.32e-13
N1.HOG0000003	Lodge	PS_chr10_G041868	Nor	PA_chr04_G001602	6.69e-14	2.91e-13	2.91e-13
N1.HOG0000003	Lodge	PS_chr12_G049656	Nor	PA_chr07_G001855	3.03e-13	8.27e-18	3.03e-13
N1.HOG0000003	Lodge	PS_chr12_G050780	Nor	PA_chr10_G001113	2.10e-19	4.96e-13	4.96e-13
N1.HOG0000003	Lodge	PS_chr06_G024331	Nor	PA_chr11_G000133	2.62e-17	6.18e-13	6.18e-13
N1.HOG0000003	Lodge	PS_chr06_G025736	Nor	PA_chr07_G004123	7.49e-13	2.34e-23	7.49e-13
N1.HOG0000003	Lodge	PS_chr06_G024331	Nor	PA_chr07_G004127	5.68e-17	2.74e-12	2.74e-12
N1.HOG0000003	Lodge	PS_chr06_G025736	Nor	PA_chr10_G002024	5.08e-12	2.08e-13	5.08e-12
N1.HOG0000003	Lodge	PS_chr06_G024331	Nor	PA_chr10_G003755	3.66e-20	1.21e-11	1.21e-11
N1.HOG0000003	Lodge	PS_chr12_G050780	Nor	PA_chr04_G001602	1.37e-24	1.41e-11	1.41e-11
N1.HOG0000003	Lodge	PS_chr05_G021617	Nor	PA_chr09_G001152	1.44e-11	1.11e-11	1.44e-11
N1.HOG0000003	Lodge	PS_chr01_G001415	Nor	PA_chr07_G004123	1.62e-11	8.47e-24	1.62e-11
N1.HOG0000003	Lodge	PS_chr05_G021617	Nor	PA_chr10_G002024	1.92e-11	2.64e-13	1.92e-11
N1.HOG0000003	Lodge	PS_chr06_G024331	Nor	PA_chr04_G001602	1.04e-16	2.00e-11	2e-11
N1.HOG0000003	Lodge	PS_chr10_G041868	Nor	PA_chr07_G004127	4.01e-13	2.36e-11	2.36e-11
N1.HOG0000003	Lodge	PS_chr10_G041868	Nor	PA_chr10_G002024	2.97e-11	1.61e-12	2.97e-11
N1.HOG0000003	Lodge	PS_chr07_G030691	Nor	PA_chr10_G001113	3.44e-11	1.45e-14	3.44e-11
N1.HOG0000003	Lodge	PS_chr10_G041863	Nor	PA_chr07_G004123	3.93e-11	1.40e-24	3.93e-11
N1.HOG0000003	Lodge	PS_chr07_G030691	Nor	PA_chr07_G001855	4.83e-11	4.44e-17	4.83e-11
N1.HOG0000003	Lodge	PS_chr07_G030691	Nor	PA_chr10_G002024	4.85e-11	5.52e-15	4.85e-11
N1.HOG0000003	Lodge	PS_chr01_G001415	Nor	PA_chr10_G002024	5.47e-11	1.57e-12	5.47e-11
N1.HOG0000003	Lodge	PS_chr06_G024331	Nor	PA_chr10_G002026	1.91e-14	6.99e-11	6.99e-11
N1.HOG0000003	Lodge	PS_chr10_G044116	Nor	PA_chr07_G001855	2.20e-10	6.42e-27	2.2e-10
N1.HOG0000003	Lodge	PS_chr12_G050780	Nor	PA_chr09_G001152	9.78e-16	2.34e-10	2.34e-10
N1.HOG0000003	Lodge	PS_chr10_G041868	Nor	PA_chr10_G003755	4.27e-12	4.52e-10	4.52e-10
N1.HOG0000003	Lodge	PS_chr04_G015738	Nor	PA_chr07_G004127	6.20e-17	4.82e-10	4.82e-10
N1.HOG0000003	Lodge	PS_chr12_G049656	Nor	PA_chr07_G004123	4.90e-10	2.16e-17	4.9e-10
N1.HOG0000003	Lodge	PS_chr12_G049656	Nor	PA_chr07_G004127	7.22e-12	5.80e-10	5.8e-10
N1.HOG0000003	Lodge	PS_chr06_G024331	Nor	PA_chr10_G001113	1.63e-16	5.83e-10	5.83e-10
N1.HOG0000003	Lodge	PS_chr09_G037691	Nor	PA_chr10_G001122	6.69e-10	7.99e-11	6.69e-10
N1.HOG0000003	Lodge	PS_chr04_G015738	Nor	PA_chr10_G002026	1.31e-15	7.09e-10	7.09e-10
N1.HOG0000003	Lodge	PS_chr12_G050780	Nor	PA_chr10_G003755	1.39e-22	1.18e-09	1.18e-09
N1.HOG0000003	Lodge	PS_chr12_G050780	Nor	PA_chr10_G002026	1.43e-19	1.21e-09	1.21e-09
N1.HOG0000003	Lodge	PS_chr10_G044116	Nor	PA_chr10_G003756	1.24e-09	3.54e-12	1.24e-09
N1.HOG0000003	Lodge	PS_chr04_G015738	Nor	PA_chr10_G003756	6.74e-19	1.35e-09	1.35e-09
N1.HOG0000003	Lodge	PS_chr07_G030691	Nor	PA_chr10_G001122	1.50e-09	1.72e-13	1.5e-09
N1.HOG0000003	Lodge	PS_chr01_G001415	Nor	PA_chr07_G004127	1.51e-09	1.23e-09	1.51e-09
N1.HOG0000003	Lodge	PS_chr09_G037691	Nor	PA_chr11_G000133	8.12e-14	1.80e-09	1.8e-09
N1.HOG0000003	Lodge	PS_chr11_G045002	Nor	PA_chr04_G001602	3.19e-09	3.95e-13	3.19e-09
N1.HOG0000003	Lodge	PS_chr01_G001415	Nor	PA_chr10_G001122	3.61e-09	1.26e-12	3.61e-09
N1.HOG0000003	Lodge	PS_chr09_G037691	Nor	PA_chr10_G002026	4.36e-20	5.45e-09	5.45e-09
N1.HOG0000003	Lodge	PS_chr09_G037691	Nor	PA_chr10_G001113	1.41e-18	6.83e-09	6.83e-09
N1.HOG0000003	Lodge	PS_chr10_G041868	Nor	PA_chr10_G001122	9.22e-09	1.48e-11	9.22e-09
N1.HOG0000003	Lodge	PS_chr01_G001415	Nor	PA_chr09_G001152	1.06e-08	8.25e-09	1.06e-08
N1.HOG0000003	Lodge	PS_chr10_G044116	Nor	PA_chr11_G000133	1.37e-08	2.20e-16	1.37e-08
N1.HOG0000003	Lodge	PS_sUP1909_G057581	Nor	PA_chr10_G002026	1.54e-08	2.03e-09	1.54e-08
N1.HOG0000003	Lodge	PS_chr01_G001415	Nor	PA_chr10_G001113	2.06e-08	3.85e-11	2.06e-08
N1.HOG0000003	Lodge	PS_chr10_G041863	Nor	PA_chr07_G004127	2.11e-08	1.16e-08	2.11e-08
N1.HOG0000003	Lodge	PS_chr09_G037691	Nor	PA_chr07_G004127	1.68e-13	2.13e-08	2.13e-08
N1.HOG0000003	Lodge	PS_chr01_G001415	Nor	PA_chr11_G000133	2.35e-08	1.27e-10	2.35e-08
N1.HOG0000003	Lodge	PS_chr10_G041868	Nor	PA_chr10_G001113	2.79e-08	8.25e-09	2.79e-08
N1.HOG0000003	Lodge	PS_chr09_G037691	Nor	PA_chr04_G001602	4.64e-12	3.67e-08	3.67e-08
N1.HOG0000003	Lodge	PS_chr12_G050780	Nor	PA_chr10_G003756	6.13e-23	3.82e-08	3.82e-08
N1.HOG0000003	Lodge	PS_chr01_G001415	Nor	PA_chr10_G002026	3.95e-08	3.59e-08	3.95e-08
N1.HOG0000003	Lodge	PS_chr05_G021617	Nor	PA_chr10_G003756	1.23e-11	4.01e-08	4.01e-08
N1.HOG0000003	Lodge	PS_chr07_G030691	Nor	PA_chr07_G004123	4.48e-08	5.17e-19	4.48e-08
N1.HOG0000003	Lodge	PS_chr04_G015738	Nor	PA_chr10_G003755	8.41e-18	4.93e-08	4.93e-08
N1.HOG0000003	Lodge	PS_chr12_G049656	Nor	PA_chr10_G001113	5.88e-08	7.42e-09	5.88e-08
N1.HOG0000003	Lodge	PS_chr10_G044116	Nor	PA_chr04_G001602	7.05e-08	8.19e-10	7.05e-08
N1.HOG0000003	Lodge	PS_chr11_G045002	Nor	PA_chr11_G000133	7.86e-08	3.22e-16	7.86e-08
N1.HOG0000003	Lodge	PS_chr11_G045002	Nor	PA_chr07_G001853	8.75e-08	3.68e-08	8.75e-08
N1.HOG0000003	Lodge	PS_chr10_G044116	Nor	PA_chr10_G002024	1.13e-07	3.91e-19	1.13e-07
N1.HOG0000003	Lodge	PS_sUP1909_G057581	Nor	PA_chr09_G001152	1.45e-07	1.37e-09	1.45e-07
N1.HOG0000003	Lodge	PS_chr11_G045002	Nor	PA_chr07_G004123	1.77e-07	1.45e-23	1.77e-07
N1.HOG0000003	Lodge	PS_chr12_G049656	Nor	PA_chr10_G001122	1.93e-07	7.59e-10	1.93e-07
N1.HOG0000003	Lodge	PS_chr01_G001415	Nor	PA_chr04_G001602	1.61e-09	2.11e-07	2.11e-07
N1.HOG0000003	Lodge	PS_sUP1909_G057581	Nor	PA_chr04_G001602	1.72e-07	2.32e-07	2.32e-07
N1.HOG0000003	Lodge	PS_chr12_G049656	Nor	PA_chr09_G001152	7.24e-09	2.33e-07	2.33e-07
N1.HOG0000003	Lodge	PS_chr10_G041863	Nor	PA_chr07_G001855	2.40e-07	2.02e-14	2.4e-07
N1.HOG0000003	Lodge	PS_chr07_G030691	Nor	PA_chr07_G004127	3.27e-07	4.61e-10	3.27e-07
N1.HOG0000003	Lodge	PS_chr11_G045002	Nor	PA_chr07_G001855	3.42e-07	1.95e-18	3.42e-07
N1.HOG0000003	Lodge	PS_chr04_G015738	Nor	PA_chr09_G001152	9.50e-10	4.06e-07	4.06e-07
N1.HOG0000003	Lodge	PS_chr09_G037691	Nor	PA_chr10_G003755	2.11e-22	5.44e-07	5.44e-07
N1.HOG0000003	Lodge	PS_chr10_G041863	Nor	PA_chr10_G002024	5.81e-07	8.87e-09	5.81e-07
N1.HOG0000003	Lodge	PS_chr10_G041863	Nor	PA_chr04_G001602	6.69e-07	2.43e-09	6.69e-07
N1.HOG0000003	Lodge	PS_chr06_G025736	Nor	PA_chr07_G001855	6.75e-07	2.37e-10	6.75e-07
N1.HOG0000003	Lodge	PS_chr10_G044116	Nor	PA_chr10_G001113	6.76e-07	1.72e-15	6.76e-07
N1.HOG0000003	Lodge	PS_chr11_G045002	Nor	PA_chr07_G004127	7.99e-07	1.36e-13	7.99e-07
N1.HOG0000003	Lodge	PS_chr11_G045002	Nor	PA_chr10_G003755	8.12e-07	1.26e-08	8.12e-07
N1.HOG0000003	Lodge	PS_chr11_G045002	Nor	PA_chr10_G002024	9.47e-07	4.16e-12	9.47e-07
N1.HOG0000003	Lodge	PS_chr12_G049656	Nor	PA_chr04_G001602	1.21e-09	1.02e-06	1.02e-06
N1.HOG0000003	Lodge	PS_chr12_G049656	Nor	PA_chr11_G000133	3.80e-07	1.14e-06	1.14e-06
N1.HOG0000003	Lodge	PS_chr07_G030691	Nor	PA_chr10_G002026	6.71e-08	1.59e-06	1.59e-06
N1.HOG0000003	Lodge	PS_sUP1909_G057581	Nor	PA_chr11_G000133	1.69e-06	5.44e-11	1.69e-06
N1.HOG0000003	Lodge	PS_chr10_G044116	Nor	PA_chr10_G002026	1.80e-06	4.08e-12	1.8e-06
N1.HOG0000003	Lodge	PS_sUP1909_G057581	Nor	PA_chr10_G002024	2.06e-06	5.09e-10	2.06e-06
N1.HOG0000003	Lodge	PS_chr10_G044116	Nor	PA_chr07_G004123	2.13e-06	1.61e-25	2.13e-06
N1.HOG0000003	Lodge	PS_chr06_G024331	Nor	PA_chr10_G003756	2.69e-12	2.57e-06	2.57e-06
N1.HOG0000003	Lodge	PS_chr06_G024331	Nor	PA_chr09_G001152	6.70e-11	3.30e-06	3.3e-06
N1.HOG0000003	Lodge	PS_chr07_G030691	Nor	PA_chr09_G001152	3.55e-06	4.45e-07	3.55e-06
N1.HOG0000003	Lodge	PS_chr10_G041863	Nor	PA_chr10_G003755	3.78e-06	3.01e-06	3.78e-06
N1.HOG0000003	Lodge	PS_chr11_G045002	Nor	PA_chr10_G001113	5.61e-06	6.57e-17	5.61e-06
N1.HOG0000003	Lodge	PS_sUP1909_G057581	Nor	PA_chr07_G004123	5.76e-06	6.08e-17	5.76e-06
N1.HOG0000003	Lodge	PS_chr10_G044116	Nor	PA_chr10_G001122	5.92e-06	1.60e-17	5.92e-06
N1.HOG0000003	Lodge	PS_chr10_G041868	Nor	PA_chr11_G000133	5.25e-06	6.24e-06	6.24e-06
N1.HOG0000003	Lodge	PS_chr06_G025736	Nor	PA_chr10_G002026	5.17e-07	7.33e-06	7.33e-06
N1.HOG0000003	Lodge	PS_chr04_G015738	Nor	PA_chr07_G001853	6.15e-15	7.38e-06	7.38e-06
N1.HOG0000003	Lodge	PS_chr05_G021617	Nor	PA_chr10_G002026	9.22e-08	8.57e-06	8.57e-06
N1.HOG0000003	Lodge	PS_chr10_G044116	Nor	PA_chr10_G003755	9.10e-06	3.12e-08	9.1e-06
N1.HOG0000003	Lodge	PS_chr07_G030691	Nor	PA_chr10_G003755	1.79e-07	9.29e-06	9.29e-06
N1.HOG0000003	Lodge	PS_chr05_G021617	Nor	PA_chr10_G003755	1.37e-08	9.72e-06	9.72e-06
N1.HOG0000003	Lodge	PS_sUP1909_G057581	Nor	PA_chr07_G004127	9.92e-06	5.73e-09	9.92e-06
N1.HOG0000003	Lodge	PS_chr05_G021617	Nor	PA_chr07_G001853	7.15e-10	1.25e-05	1.25e-05
N1.HOG0000003	Lodge	PS_chr07_G030691	Nor	PA_chr07_G001853	4.65e-09	1.32e-05	1.32e-05
N1.HOG0000003	Lodge	PS_chr09_G037691	Nor	PA_chr09_G001152	1.07e-10	1.59e-05	1.59e-05
N1.HOG0000003	Lodge	PS_chr10_G044115	Nor	PA_chr10_G002024	2.03e-05	1.46e-11	2.03e-05
N1.HOG0000003	Lodge	PS_chr10_G044116	Nor	PA_chr07_G001853	2.15e-05	3.86e-06	2.15e-05
N1.HOG0000003	Lodge	PS_chr12_G049656	Nor	PA_chr10_G002026	7.75e-09	2.30e-05	2.3e-05
N1.HOG0000003	Lodge	PS_chr09_G037691	Nor	PA_chr07_G001853	3.78e-15	2.53e-05	2.53e-05
N1.HOG0000003	Lodge	PS_chr07_G030691	Nor	PA_chr10_G003756	4.62e-08	2.58e-05	2.58e-05
N1.HOG0000003	Lodge	PS_chr10_G041863	Nor	PA_chr10_G001113	3.15e-05	5.14e-06	3.15e-05
N1.HOG0000003	Lodge	PS_chr11_G045002	Nor	PA_chr10_G003756	3.23e-05	9.95e-07	3.23e-05
N1.HOG0000003	Lodge	PS_chr01_G001415	Nor	PA_chr10_G003755	1.47e-07	3.90e-05	3.9e-05
N1.HOG0000003	Lodge	PS_chr06_G024331	Nor	PA_chr07_G001853	6.52e-13	3.97e-05	3.97e-05
N1.HOG0000003	Lodge	PS_sUP1909_G057581	Nor	PA_chr10_G001122	4.25e-05	6.58e-10	4.25e-05
N1.HOG0000003	Lodge	PS_chr10_G041863	Nor	PA_chr10_G001122	5.10e-05	1.91e-10	5.1e-05
N1.HOG0000003	Lodge	PS_chr11_G045002	Nor	PA_chr09_G001152	5.26e-05	3.97e-10	5.26e-05
N1.HOG0000003	Lodge	PS_chr06_G025736	Nor	PA_chr10_G001113	5.38e-05	4.32e-08	5.38e-05
N1.HOG0000003	Lodge	PS_chr10_G041863	Nor	PA_chr09_G001152	6.11e-05	2.50e-05	6.11e-05
N1.HOG0000003	Lodge	PS_chr11_G045002	Nor	PA_chr10_G001122	7.22e-05	4.62e-13	7.22e-05
N1.HOG0000003	Lodge	PS_chr10_G041868	Nor	PA_chr10_G002026	3.35e-06	7.80e-05	7.8e-05
N1.HOG0000003	Lodge	PS_chr10_G044116	Nor	PA_chr09_G001152	8.04e-05	1.81e-10	8.04e-05
N1.HOG0000003	Lodge	PS_sUP1909_G057581	Nor	PA_chr10_G001113	8.92e-05	3.02e-10	8.92e-05
N1.HOG0000003	Lodge	PS_chr10_G044116	Nor	PA_chr07_G004127	9.18e-05	3.18e-10	9.18e-05
N1.HOG0000003	Lodge	PS_chr11_G045002	Nor	PA_chr01_G003247	7.36e-07	9.82e-05	9.82e-05
N1.HOG0000003	Lodge	PS_chr06_G025736	Nor	PA_chr10_G003756	8.58e-05	1.38e-04	0.000138
N1.HOG0000003	Lodge	PS_chr10_G044115	Nor	PA_chr10_G002026	1.52e-04	5.72e-06	0.000152
N1.HOG0000003	Lodge	PS_sUP1909_G057581	Nor	PA_chr10_G003756	1.53e-04	4.61e-05	0.000153
N1.HOG0000003	Lodge	PS_chr10_G041868	Nor	PA_chr09_G001152	1.53e-04	1.52e-04	0.000153
N1.HOG0000003	Lodge	PS_chr10_G042628	Nor	PA_chr10_G002024	1.59e-04	1.05e-04	0.000159
N1.HOG0000003	Lodge	PS_chr06_G025736	Nor	PA_chr11_G000133	1.86e-04	8.54e-06	0.000186
N1.HOG0000003	Lodge	PS_chr06_G025736	Nor	PA_chr04_G001602	2.42e-04	1.11e-04	0.000242
N1.HOG0000003	Lodge	PS_chr06_G024332	Nor	PA_chr07_G004127	2.95e-04	3.13e-11	0.000295
N1.HOG0000003	Lodge	PS_chr10_G041868	Nor	PA_chr07_G001853	2.75e-07	3.24e-04	0.000324
N1.HOG0000003	Lodge	PS_chr12_G050780	Nor	PA_chr07_G001853	2.19e-17	3.57e-04	0.000357
N1.HOG0000003	Lodge	PS_chr01_G001415	Nor	PA_chr10_G003756	3.54e-05	4.32e-04	0.000432
N1.HOG0000003	Lodge	PS_chr10_G042628	Nor	PA_chr07_G001855	5.93e-04	7.59e-08	0.000593
N1.HOG0000003	Lodge	PS_chr06_G025736	Nor	PA_chr07_G004127	8.05e-04	5.43e-07	0.000805
N1.HOG0000003	Lodge	PS_chr10_G041863	Nor	PA_chr01_G003247	2.19e-06	8.36e-04	0.000836
N1.HOG0000003	Lodge	PS_chr09_G037691	Nor	PA_chr10_G003756	1.55e-10	8.74e-04	0.000874
N1.HOG0000003	Lodge	PS_sUP1909_G057581	Nor	PA_chr10_G003755	2.16e-05	8.74e-04	0.000874
N1.HOG0000003	Lodge	PS_sUP1909_G057581	Nor	PA_chr07_G001855	1.06e-03	2.17e-11	0.00106
N1.HOG0000003	Lodge	PS_chr06_G024332	Nor	PA_chr07_G001855	1.07e-03	4.49e-07	0.00107
N1.HOG0000003	Lodge	PS_chr10_G044115	Nor	PA_chr09_G001152	1.21e-03	3.72e-07	0.00121
N1.HOG0000003	Lodge	PS_chr06_G025736	Nor	PA_chr07_G001853	1.06e-05	1.24e-03	0.00124
N1.HOG0000003	Lodge	PS_chr10_G044115	Nor	PA_chr10_G001113	1.34e-03	2.49e-08	0.00134
N1.HOG0000003	Lodge	PS_sUP1909_G057581	Nor	PA_chr07_G001853	2.45e-06	1.96e-03	0.00196
N1.HOG0000003	Lodge	PS_chr10_G044115	Nor	PA_chr10_G003755	2.06e-03	3.35e-05	0.00206
N1.HOG0000003	Lodge	PS_chr06_G024332	Nor	PA_chr10_G003756	2.26e-03	3.73e-06	0.00226
N1.HOG0000003	Lodge	PS_chr12_G049656	Nor	PA_chr10_G003755	4.53e-05	2.71e-03	0.00271
N1.HOG0000003	Lodge	PS_chr10_G044115	Nor	PA_chr11_G000133	2.73e-03	3.84e-06	0.00273
N1.HOG0000003	Lodge	PS_chr12_G049656	Nor	PA_chr10_G003756	1.36e-05	2.82e-03	0.00282
N1.HOG0000003	Lodge	PS_chr10_G044115	Nor	PA_chr07_G004123	2.83e-03	1.61e-12	0.00283
N1.HOG0000003	Lodge	PS_chr11_G045002	Nor	PA_chr10_G002026	3.99e-03	4.26e-05	0.00399
N1.HOG0000003	Lodge	PS_chr06_G025736	Nor	PA_chr09_G001152	4.20e-03	1.41e-04	0.0042
N1.HOG0000003	Lodge	PS_chr10_G041868	Nor	PA_chr10_G003756	2.73e-04	4.29e-03	0.00429
N1.HOG0000003	Lodge	PS_chr10_G042628	Nor	PA_chr09_G001152	4.53e-03	2.29e-03	0.00453
N1.HOG0000003	Lodge	PS_chr10_G041863	Nor	PA_chr10_G002026	4.62e-03	4.58e-05	0.00462
N1.HOG0000003	Lodge	PS_chr06_G024332	Nor	PA_chr10_G001122	5.00e-03	9.21e-09	0.005
N1.HOG0000003	Lodge	PS_chr10_G044115	Nor	PA_chr07_G001853	5.82e-03	9.75e-04	0.00582
N1.HOG0000003	Lodge	PS_chr06_G024332	Nor	PA_chr09_G001152	5.93e-03	8.54e-06	0.00593
N1.HOG0000003	Lodge	PS_chr12_G049656	Nor	PA_chr07_G001853	1.87e-07	5.98e-03	0.00598
N1.HOG0000003	Lodge	PS_chr10_G044116	Nor	PA_chr01_G003247	2.47e-04	7.17e-03	0.00717
N1.HOG0000003	Lodge	PS_chr07_G030691	Nor	PA_chr09_G001153	5.69e-03	8.44e-03	0.00844
N1.HOG0000003	Lodge	PS_chr01_G001415	Nor	PA_chr07_G001853	7.64e-07	9.48e-03	0.00948
N1.HOG0000003	Lodge	PS_chr10_G044115	Nor	PA_chr07_G001855	1.02e-02	7.25e-10	0.0102
N1.HOG0000003	Lodge	PS_chr06_G024332	Nor	PA_chr10_G001113	1.08e-02	8.82e-10	0.0108
N1.HOG0000003	Lodge	PS_chr10_G044115	Nor	PA_chr07_G004127	1.26e-02	1.68e-04	0.0126
N1.HOG0000003	Lodge	PS_chr10_G041863	Nor	PA_chr07_G001853	6.62e-03	1.46e-02	0.0146
N1.HOG0000003	Lodge	PS_chr10_G041868	Nor	PA_chr01_G003247	5.41e-05	1.47e-02	0.0147
N1.HOG0000003	Lodge	PS_chr10_G042628	Nor	PA_chr07_G004127	1.58e-02	1.28e-03	0.0158
N1.HOG0000003	Lodge	PS_chr06_G024332	Nor	PA_chr04_G001602	1.59e-02	6.89e-03	0.0159
N1.HOG0000003	Lodge	PS_chr06_G025736	Nor	PA_chr10_G001122	1.77e-02	6.09e-07	0.0177
N1.HOG0000003	Lodge	PS_chr10_G041863	Nor	PA_chr06_G001938	7.41e-04	1.81e-02	0.0181
N1.HOG0000003	Lodge	PS_chr10_G042628	Nor	PA_chr07_G004123	1.98e-02	2.19e-07	0.0198
N1.HOG0000003	Lodge	PS_chr06_G024332	Nor	PA_chr10_G002026	2.06e-02	3.21e-03	0.0206
N1.HOG0000003	Lodge	PS_chr05_G021617	Nor	PA_chr01_G003247	2.65e-06	2.31e-02	0.0231
N1.HOG0000003	Lodge	PS_chr06_G024332	Nor	PA_chr11_G000133	2.61e-02	6.82e-04	0.0261
N1.HOG0000003	Lodge	PS_chr10_G041868	Nor	PA_chr06_G001938	1.35e-02	2.83e-02	0.0283
N1.HOG0000003	Lodge	PS_chr10_G044115	Nor	PA_chr10_G003756	3.31e-02	8.32e-03	0.0331
N1.HOG0000003	Lodge	PS_chr06_G024332	Nor	PA_chr07_G004123	3.95e-02	7.13e-06	0.0395
N1.HOG0000003	Lodge	PS_chr12_G050780	Nor	PA_chr09_G001153	4.31e-02	3.27e-02	0.0431
N1.HOG0000003	Lodge	PS_chr09_G037691	Nor	PA_chr01_G003247	1.72e-07	4.48e-02	0.0448
N1.HOG0000003	Lodge	PS_chr10_G044115	Nor	PA_chr04_G001602	5.00e-02	3.39e-03	0.05
N1.HOG0000003	Lodge	PS_chr04_G015738	Nor	PA_chr09_G001153	2.85e-02	5.05e-02	0.0505
N1.HOG0000003	Lodge	PS_chr10_G042628	Nor	PA_chr11_G000133	7.00e-02	9.16e-03	0.07
N1.HOG0000003	Lodge	PS_chr10_G042628	Nor	PA_chr10_G001122	8.92e-02	1.21e-04	0.0892
N1.HOG0000003	Lodge	PS_chr06_G025736	Nor	PA_chr01_G003247	7.34e-04	9.11e-02	0.0911
N1.HOG0000003	Lodge	PS_chr06_G024331	Nor	PA_chr01_G003247	1.44e-07	9.58e-02	0.0958
N1.HOG0000003	Lodge	PS_chr12_G050780	Scots	PS_chr06_G024331	7.25e-59	2.45e-66	7.25e-59
N1.HOG0000003	Lodge	PS_chr12_G050780	Scots	PS_chr09_G037690	9.68e-58	6.91e-59	9.68e-58
N1.HOG0000003	Lodge	PS_chr04_G015738	Scots	PS_chr09_G037690	1.47e-49	2.49e-46	2.49e-46
N1.HOG0000003	Lodge	PS_chr09_G037691	Scots	PS_chr09_G037690	1.17e-56	8.10e-45	8.1e-45
N1.HOG0000003	Lodge	PS_chr09_G037691	Scots	PS_chr10_G044116	1.13e-51	1.59e-44	1.59e-44
N1.HOG0000003	Lodge	PS_chr06_G024331	Scots	PS_chr09_G037690	1.22e-43	1.07e-47	1.22e-43
N1.HOG0000003	Lodge	PS_chr04_G015738	Scots	PS_chr06_G024331	7.79e-42	8.87e-53	7.79e-42
N1.HOG0000003	Lodge	PS_chr10_G041868	Scots	PS_chr09_G037690	9.14e-42	4.99e-50	9.14e-42
N1.HOG0000003	Lodge	PS_chr09_G037691	Scots	PS_chr06_G024331	3.20e-41	5.28e-43	3.2e-41
N1.HOG0000003	Lodge	PS_chr12_G050780	Scots	PS_chr04_G015738	1.30e-54	1.05e-39	1.05e-39
N1.HOG0000003	Lodge	PS_chr12_G050780	Scots	PS_chr11_G045002	4.16e-47	2.24e-39	2.24e-39
N1.HOG0000003	Lodge	PS_chr12_G050780	Scots	PS_chr05_G021617	3.27e-37	5.90e-37	5.9e-37
N1.HOG0000003	Lodge	PS_chr10_G041868	Scots	PS_chr06_G024331	1.45e-35	3.06e-49	1.45e-35
N1.HOG0000003	Lodge	PS_chr10_G041868	Scots	PS_chr04_G015738	3.55e-35	4.62e-39	3.55e-35
N1.HOG0000003	Lodge	PS_chr12_G050780	Scots	PS_chr10_G041863	5.06e-52	1.33e-34	1.33e-34
N1.HOG0000003	Lodge	PS_chr06_G024331	Scots	PS_chr04_G015738	5.60e-39	2.02e-34	2.02e-34
N1.HOG0000003	Lodge	PS_chr04_G015738	Scots	PS_chr04_G015738	8.09e-42	1.19e-33	1.19e-33
N1.HOG0000003	Lodge	PS_chr10_G041863	Scots	PS_chr09_G037690	4.31e-32	8.25e-46	4.31e-32
N1.HOG0000003	Lodge	PS_chr04_G015738	Scots	PS_chr11_G045002	1.29e-38	2.74e-31	2.74e-31
N1.HOG0000003	Lodge	PS_chr05_G021617	Scots	PS_chr06_G024331	5.30e-31	1.49e-54	5.3e-31
N1.HOG0000003	Lodge	PS_chr12_G050780	Scots	PS_chr10_G044116	1.67e-30	2.47e-39	1.67e-30
N1.HOG0000003	Lodge	PS_chr06_G024331	Scots	PS_chr06_G024331	1.94e-30	6.25e-43	1.94e-30
N1.HOG0000003	Lodge	PS_chr06_G024331	Scots	PS_chr10_G044116	2.42e-30	2.64e-43	2.42e-30
N1.HOG0000003	Lodge	PS_chr06_G024331	Scots	PS_chr11_G045002	7.60e-34	3.89e-30	3.89e-30
N1.HOG0000003	Lodge	PS_chr05_G021617	Scots	PS_chr09_G037690	8.39e-30	2.20e-43	8.39e-30
N1.HOG0000003	Lodge	PS_chr04_G015738	Scots	PS_chr10_G044116	1.54e-29	9.41e-33	1.54e-29
N1.HOG0000003	Lodge	PS_chr10_G044116	Scots	PS_chr09_G037690	2.46e-29	1.87e-47	2.46e-29
N1.HOG0000003	Lodge	PS_chr05_G021617	Scots	PS_chr11_G045002	1.29e-28	1.03e-35	1.29e-28
N1.HOG0000003	Lodge	PS_chr10_G041868	Scots	PS_chr10_G041868	3.71e-27	1.27e-29	3.71e-27
N1.HOG0000003	Lodge	PS_chr05_G021617	Scots	PS_chr10_G041863	3.20e-32	3.84e-26	3.84e-26
N1.HOG0000003	Lodge	PS_chr01_G001415	Scots	PS_chr11_G045002	7.22e-25	9.68e-29	7.22e-25
N1.HOG0000003	Lodge	PS_chr12_G049656	Scots	PS_chr06_G024331	1.12e-24	1.35e-38	1.12e-24
N1.HOG0000003	Lodge	PS_chr04_G015738	Scots	PS_chr05_G021617	2.56e-24	1.07e-24	2.56e-24
N1.HOG0000003	Lodge	PS_chr09_G037691	Scots	PS_chr04_G015738	3.10e-33	1.27e-23	1.27e-23
N1.HOG0000003	Lodge	PS_chr04_G015738	Scots	PS_chr10_G041868	1.50e-30	1.58e-23	1.58e-23
N1.HOG0000003	Lodge	PS_chr10_G041863	Scots	PS_chr06_G024331	1.73e-23	6.84e-39	1.73e-23
N1.HOG0000003	Lodge	PS_chr11_G045002	Scots	PS_chr10_G041868	1.87e-23	8.58e-33	1.87e-23
N1.HOG0000003	Lodge	PS_chr12_G050780	Scots	PS_chr10_G041868	7.98e-34	2.00e-23	2e-23
N1.HOG0000003	Lodge	PS_chr10_G044116	Scots	PS_chr06_G024331	2.07e-23	1.55e-50	2.07e-23
N1.HOG0000003	Lodge	PS_chr10_G041868	Scots	PS_chr10_G041863	8.40e-29	3.00e-23	3e-23
N1.HOG0000003	Lodge	PS_chr10_G041863	Scots	PS_chr04_G015738	5.42e-23	8.64e-30	5.42e-23
N1.HOG0000003	Lodge	PS_chr12_G049656	Scots	PS_chr11_G045002	1.63e-22	1.86e-24	1.63e-22
N1.HOG0000003	Lodge	PS_chr05_G021617	Scots	PS_chr04_G015738	1.75e-22	2.70e-24	1.75e-22
N1.HOG0000003	Lodge	PS_chr12_G050780	Scots	PS_chr10_G044115	8.06e-28	2.89e-22	2.89e-22
N1.HOG0000003	Lodge	PS_chr11_G045002	Scots	PS_chr06_G024331	5.42e-22	5.73e-51	5.42e-22
N1.HOG0000003	Lodge	PS_chr09_G037691	Scots	PS_chr11_G045002	1.47e-32	1.11e-21	1.11e-21
N1.HOG0000003	Lodge	PS_chr06_G024331	Scots	PS_chr10_G041868	6.92e-25	3.59e-21	3.59e-21
N1.HOG0000003	Lodge	PS_chr12_G050780	Scots	PS_chr10_G044114	3.56e-23	5.00e-21	5e-21
N1.HOG0000003	Lodge	PS_chr05_G021617	Scots	PS_chr05_G021617	5.96e-21	6.75e-31	5.96e-21
N1.HOG0000003	Lodge	PS_chr04_G015738	Scots	PS_chr10_G041863	3.78e-33	3.21e-20	3.21e-20
N1.HOG0000003	Lodge	PS_chr01_G001415	Scots	PS_chr06_G024331	3.75e-20	1.69e-33	3.75e-20
N1.HOG0000003	Lodge	PS_chr09_G037691	Scots	PS_chr10_G041868	1.29e-23	4.71e-20	4.71e-20
N1.HOG0000003	Lodge	PS_chr06_G024331	Scots	PS_chr05_G021617	3.04e-19	1.50e-21	3.04e-19
N1.HOG0000003	Lodge	PS_chr06_G025736	Scots	PS_chr10_G044116	4.42e-19	7.61e-28	4.42e-19
N1.HOG0000003	Lodge	PS_chr10_G041868	Scots	PS_chr11_G045002	5.79e-19	1.49e-23	5.79e-19
N1.HOG0000003	Lodge	PS_chr01_G001415	Scots	PS_chr09_G037690	8.03e-19	2.97e-26	8.03e-19
N1.HOG0000003	Lodge	PS_chr10_G042628	Scots	PS_chr01_G001415	2.87e-28	1.23e-18	1.23e-18
N1.HOG0000003	Lodge	PS_chr01_G001415	Scots	PS_chr04_G015738	1.28e-18	1.51e-18	1.51e-18
N1.HOG0000003	Lodge	PS_chr10_G044116	Scots	PS_chr10_G041863	3.01e-18	3.39e-21	3.01e-18
N1.HOG0000003	Lodge	PS_chr05_G021617	Scots	PS_chr10_G041868	3.14e-18	8.83e-19	3.14e-18
N1.HOG0000003	Lodge	PS_chr10_G044116	Scots	PS_chr04_G015738	4.43e-18	8.72e-26	4.43e-18
N1.HOG0000003	Lodge	PS_chr01_G001415	Scots	PS_chr05_G021617	6.14e-18	2.17e-24	6.14e-18
N1.HOG0000003	Lodge	PS_chr10_G041863	Scots	PS_chr10_G041868	8.01e-18	2.77e-23	8.01e-18
N1.HOG0000003	Lodge	PS_chr06_G024331	Scots	PS_chr10_G041863	9.84e-24	1.09e-17	1.09e-17
N1.HOG0000003	Lodge	PS_chr04_G015738	Scots	PS_chr12_G049656	3.63e-20	1.18e-17	1.18e-17
N1.HOG0000003	Lodge	PS_chr10_G044116	Scots	PS_chr11_G045002	4.85e-17	3.11e-30	4.85e-17
N1.HOG0000003	Lodge	PS_chr01_G001415	Scots	PS_chr10_G044115	4.87e-17	2.65e-17	4.87e-17
N1.HOG0000003	Lodge	PS_chr12_G049656	Scots	PS_chr09_G037690	9.53e-17	1.70e-18	9.53e-17
N1.HOG0000003	Lodge	PS_chr11_G045002	Scots	PS_chr09_G037690	2.20e-16	1.60e-33	2.2e-16
N1.HOG0000003	Lodge	PS_chr04_G015738	Scots	PS_chr10_G044115	8.55e-20	3.24e-16	3.24e-16
N1.HOG0000003	Lodge	PS_chr11_G045002	Scots	PS_chr04_G015738	3.29e-16	1.32e-26	3.29e-16
N1.HOG0000003	Lodge	PS_chr09_G037691	Scots	PS_chr05_G021617	5.50e-16	7.59e-17	5.5e-16
N1.HOG0000003	Lodge	PS_chr01_G001415	Scots	PS_chr10_G041863	5.87e-21	5.78e-16	5.78e-16
N1.HOG0000003	Lodge	PS_chr12_G049656	Scots	PS_chr10_G044115	4.24e-20	9.71e-16	9.71e-16
N1.HOG0000003	Lodge	PS_chr06_G024331	Scots	PS_chr10_G044115	2.06e-17	1.15e-15	1.15e-15
N1.HOG0000003	Lodge	PS_chr07_G030691	Scots	PS_chr10_G041868	2.19e-15	1.49e-19	2.19e-15
N1.HOG0000003	Lodge	PS_chr05_G021617	Scots	PS_chr10_G044115	3.19e-15	3.85e-19	3.19e-15
N1.HOG0000003	Lodge	PS_chr10_G044116	Scots	PS_chr05_G021617	3.36e-15	9.67e-32	3.36e-15
N1.HOG0000003	Lodge	PS_chr07_G030691	Scots	PS_chr05_G021617	8.40e-15	1.30e-25	8.4e-15
N1.HOG0000003	Lodge	PS_chr01_G001415	Scots	PS_chr01_G001415	2.32e-25	1.57e-14	1.57e-14
N1.HOG0000003	Lodge	PS_chr05_G021617	Scots	PS_chr10_G044114	1.81e-14	5.71e-19	1.81e-14
N1.HOG0000003	Lodge	PS_chr07_G030691	Scots	PS_chr09_G037690	1.88e-14	5.26e-24	1.88e-14
N1.HOG0000003	Lodge	PS_chr10_G041863	Scots	PS_chr11_G045002	2.33e-14	1.03e-21	2.33e-14
N1.HOG0000003	Lodge	PS_chr12_G049656	Scots	PS_chr05_G021617	4.60e-14	7.06e-19	4.6e-14
N1.HOG0000003	Lodge	PS_chr04_G015738	Scots	PS_chr07_G030691	3.60e-19	6.81e-14	6.81e-14
N1.HOG0000003	Lodge	PS_chr10_G044116	Scots	PS_chr10_G044116	1.27e-13	3.41e-20	1.27e-13
N1.HOG0000003	Lodge	PS_chr07_G030691	Scots	PS_chr06_G024331	1.31e-13	5.67e-32	1.31e-13
N1.HOG0000003	Lodge	PS_chr12_G050780	Scots	PS_chr07_G030691	1.62e-20	1.84e-13	1.84e-13
N1.HOG0000003	Lodge	PS_chr01_G001415	Scots	PS_chr10_G041868	2.25e-13	3.90e-14	2.25e-13
N1.HOG0000003	Lodge	PS_chr09_G037691	Scots	PS_chr07_G030691	4.45e-18	2.33e-13	2.33e-13
N1.HOG0000003	Lodge	PS_chr06_G025736	Scots	PS_chr09_G037690	2.59e-13	5.33e-16	2.59e-13
N1.HOG0000003	Lodge	PS_chr12_G050780	Scots	PS_chr01_G001415	6.57e-27	2.74e-13	2.74e-13
N1.HOG0000003	Lodge	PS_chr05_G021617	Scots	PS_chr07_G030691	3.23e-13	2.86e-13	3.23e-13
N1.HOG0000003	Lodge	PS_chr10_G041863	Scots	PS_chr10_G041863	5.04e-13	3.91e-14	5.04e-13
N1.HOG0000003	Lodge	PS_chr12_G049656	Scots	PS_chr04_G015738	4.79e-16	6.10e-13	6.1e-13
N1.HOG0000003	Lodge	PS_chr10_G041868	Scots	PS_chr10_G044116	9.85e-13	1.45e-21	9.85e-13
N1.HOG0000003	Lodge	PS_chr04_G015738	Scots	PS_chr10_G044114	2.20e-13	1.27e-12	1.27e-12
N1.HOG0000003	Lodge	PS_chr12_G049656	Scots	PS_chr10_G041863	2.09e-18	1.62e-12	1.62e-12
N1.HOG0000003	Lodge	PS_chr04_G015738	Scots	PS_chr01_G001415	1.44e-23	1.78e-12	1.78e-12
N1.HOG0000003	Lodge	PS_chr10_G041868	Scots	PS_chr05_G021617	2.04e-12	1.53e-16	2.04e-12
N1.HOG0000003	Lodge	PS_chr07_G030691	Scots	PS_chr10_G041863	2.12e-13	2.29e-12	2.29e-12
N1.HOG0000003	Lodge	PS_chr01_G001415	Scots	PS_chr12_G050780	2.38e-13	2.86e-12	2.86e-12
N1.HOG0000003	Lodge	PS_chr12_G049656	Scots	PS_chr01_G001415	8.89e-25	3.45e-12	3.45e-12
N1.HOG0000003	Lodge	PS_chr09_G037691	Scots	PS_chr10_G041863	4.63e-18	3.77e-12	3.77e-12
N1.HOG0000003	Lodge	PS_chr04_G015738	Scots	PS_chr10_G042228	2.29e-18	4.47e-12	4.47e-12
N1.HOG0000003	Lodge	PS_chr12_G050780	Scots	PS_chr12_G049656	2.45e-14	5.38e-12	5.38e-12
N1.HOG0000003	Lodge	PS_chr12_G050780	Scots	PS_chr10_G042228	2.20e-27	6.74e-12	6.74e-12
N1.HOG0000003	Lodge	PS_sUP1909_G057581	Scots	PS_chr06_G024331	7.59e-12	2.61e-25	7.59e-12
N1.HOG0000003	Lodge	PS_chr01_G001415	Scots	PS_chr10_G044114	8.76e-12	4.48e-15	8.76e-12
N1.HOG0000003	Lodge	PS_chr12_G049656	Scots	PS_chr10_G041868	7.55e-15	1.40e-11	1.4e-11
N1.HOG0000003	Lodge	PS_chr05_G021617	Scots	PS_chr01_G001415	2.82e-15	1.70e-11	1.7e-11
N1.HOG0000003	Lodge	PS_chr10_G044116	Scots	PS_chr10_G044115	1.83e-11	9.49e-19	1.83e-11
N1.HOG0000003	Lodge	PS_chr06_G025736	Scots	PS_chr11_G045002	2.20e-11	1.49e-13	2.2e-11
N1.HOG0000003	Lodge	PS_chr07_G030691	Scots	PS_chr10_G042228	3.13e-14	3.49e-11	3.49e-11
N1.HOG0000003	Lodge	PS_chr11_G045002	Scots	PS_chr05_G021617	4.19e-11	5.66e-29	4.19e-11
N1.HOG0000003	Lodge	PS_chr10_G044116	Scots	PS_chr10_G041868	5.59e-11	4.05e-18	5.59e-11
N1.HOG0000003	Lodge	PS_chr06_G024331	Scots	PS_chr10_G044114	5.64e-11	7.05e-12	5.64e-11
N1.HOG0000003	Lodge	PS_chr05_G021617	Scots	PS_chr10_G044116	6.72e-11	4.13e-20	6.72e-11
N1.HOG0000003	Lodge	PS_sUP1909_G057581	Scots	PS_chr10_G044115	9.28e-11	7.24e-15	9.28e-11
N1.HOG0000003	Lodge	PS_chr10_G044116	Scots	PS_chr10_G044114	1.15e-10	4.66e-19	1.15e-10
N1.HOG0000003	Lodge	PS_chr07_G030691	Scots	PS_chr11_G045002	1.73e-10	1.84e-15	1.73e-10
N1.HOG0000003	Lodge	PS_chr11_G045002	Scots	PS_chr10_G044115	1.84e-10	1.99e-18	1.84e-10
N1.HOG0000003	Lodge	PS_chr10_G041868	Scots	PS_chr10_G044114	1.97e-10	3.02e-12	1.97e-10
N1.HOG0000003	Lodge	PS_chr09_G037691	Scots	PS_chr10_G044115	2.42e-15	1.98e-10	1.98e-10
N1.HOG0000003	Lodge	PS_chr06_G024331	Scots	PS_chr07_G030691	9.83e-17	2.04e-10	2.04e-10
N1.HOG0000003	Lodge	PS_chr10_G041868	Scots	PS_chr10_G044115	2.78e-10	1.02e-10	2.78e-10
N1.HOG0000003	Lodge	PS_chr12_G050780	Scots	PS_chr12_G050780	2.61e-18	2.95e-10	2.95e-10
N1.HOG0000003	Lodge	PS_chr05_G021617	Scots	PS_chr12_G050780	2.65e-11	6.64e-10	6.64e-10
N1.HOG0000003	Lodge	PS_sUP1909_G057581	Scots	PS_chr10_G044114	6.93e-10	1.79e-13	6.93e-10
N1.HOG0000003	Lodge	PS_sUP1909_G057581	Scots	PS_chr09_G037690	7.97e-10	5.19e-18	7.97e-10
N1.HOG0000003	Lodge	PS_chr10_G044116	Scots	PS_chr10_G042228	9.93e-10	1.72e-11	9.93e-10
N1.HOG0000003	Lodge	PS_chr07_G030691	Scots	PS_chr10_G044115	1.10e-09	3.30e-13	1.1e-09
N1.HOG0000003	Lodge	PS_chr07_G030691	Scots	PS_chr04_G015738	1.47e-09	1.96e-13	1.47e-09
N1.HOG0000003	Lodge	PS_chr07_G030691	Scots	PS_chr07_G030691	1.28e-11	1.63e-09	1.63e-09
N1.HOG0000003	Lodge	PS_chr12_G049656	Scots	PS_chr12_G049656	1.77e-09	5.18e-10	1.77e-09
N1.HOG0000003	Lodge	PS_chr10_G041863	Scots	PS_chr10_G044116	2.13e-09	3.30e-25	2.13e-09
N1.HOG0000003	Lodge	PS_sUP1909_G057581	Scots	PS_chr04_G015738	2.55e-09	1.44e-10	2.55e-09
N1.HOG0000003	Lodge	PS_chr11_G045002	Scots	PS_chr12_G050780	2.74e-09	5.58e-12	2.74e-09
N1.HOG0000003	Lodge	PS_chr06_G024331	Scots	PS_chr12_G049656	3.10e-09	1.16e-10	3.1e-09
N1.HOG0000003	Lodge	PS_chr05_G021617	Scots	PS_chr10_G042228	5.08e-13	3.32e-09	3.32e-09
N1.HOG0000003	Lodge	PS_chr11_G045002	Scots	PS_chr10_G041863	3.36e-09	9.56e-13	3.36e-09
N1.HOG0000003	Lodge	PS_chr07_G030691	Scots	PS_chr10_G044114	4.89e-09	4.70e-18	4.89e-09
N1.HOG0000003	Lodge	PS_chr09_G037691	Scots	PS_chr10_G044114	6.69e-09	1.41e-10	6.69e-09
N1.HOG0000003	Lodge	PS_sUP1909_G057581	Scots	PS_chr10_G044116	7.35e-09	6.76e-10	7.35e-09
N1.HOG0000003	Lodge	PS_chr12_G049656	Scots	PS_chr10_G044114	4.10e-13	8.36e-09	8.36e-09
N1.HOG0000003	Lodge	PS_chr12_G049656	Scots	PS_chr12_G050780	1.94e-15	9.25e-09	9.25e-09
N1.HOG0000003	Lodge	PS_chr09_G037691	Scots	PS_chr12_G049656	1.21e-08	1.56e-08	1.56e-08
N1.HOG0000003	Lodge	PS_chr05_G021617	Scots	PS_chr12_G049656	2.30e-08	5.93e-09	2.3e-08
N1.HOG0000003	Lodge	PS_sUP1909_G057581	Scots	PS_chr11_G045002	3.76e-08	1.03e-13	3.76e-08
N1.HOG0000003	Lodge	PS_chr06_G025736	Scots	PS_chr10_G044115	4.99e-08	3.28e-08	4.99e-08
N1.HOG0000003	Lodge	PS_chr01_G001415	Scots	PS_chr10_G042228	7.43e-12	6.17e-08	6.17e-08
N1.HOG0000003	Lodge	PS_sUP1909_G057581	Scots	PS_chr10_G041863	2.59e-08	6.62e-08	6.62e-08
N1.HOG0000003	Lodge	PS_chr06_G024331	Scots	PS_chr10_G042228	4.27e-15	8.75e-08	8.75e-08
N1.HOG0000003	Lodge	PS_sUP1909_G057581	Scots	PS_chr05_G021617	1.13e-07	1.04e-16	1.13e-07
N1.HOG0000003	Lodge	PS_chr12_G049656	Scots	PS_chr10_G044116	1.13e-07	2.39e-10	1.13e-07
N1.HOG0000003	Lodge	PS_sUP1909_G057581	Scots	PS_chr10_G041868	1.16e-07	2.46e-10	1.16e-07
N1.HOG0000003	Lodge	PS_chr12_G050780	Scots	PS_chr10_G042628	2.48e-13	1.58e-07	1.58e-07
N1.HOG0000003	Lodge	PS_chr10_G042628	Scots	PS_chr12_G050780	7.55e-09	2.20e-07	2.2e-07
N1.HOG0000003	Lodge	PS_chr07_G030691	Scots	PS_chr01_G002237	2.36e-07	3.18e-08	2.36e-07
N1.HOG0000003	Lodge	PS_chr06_G025736	Scots	PS_chr10_G044114	2.70e-07	5.95e-12	2.7e-07
N1.HOG0000003	Lodge	PS_chr06_G024331	Scots	PS_chr12_G050780	9.03e-14	3.14e-07	3.14e-07
N1.HOG0000003	Lodge	PS_chr11_G045002	Scots	PS_chr10_G044114	4.95e-07	4.66e-18	4.95e-07
N1.HOG0000003	Lodge	PS_chr10_G041868	Scots	PS_chr01_G001415	2.08e-12	5.03e-07	5.03e-07
N1.HOG0000003	Lodge	PS_chr11_G045002	Scots	PS_chr11_G045002	5.79e-07	1.31e-18	5.79e-07
N1.HOG0000003	Lodge	PS_chr10_G042628	Scots	PS_chr11_G045002	6.01e-07	3.86e-14	6.01e-07
N1.HOG0000003	Lodge	PS_chr01_G001415	Scots	PS_chr12_G049656	6.64e-07	7.05e-11	6.64e-07
N1.HOG0000003	Lodge	PS_sUP1909_G057581	Scots	PS_chr12_G050780	2.84e-07	7.53e-07	7.53e-07
N1.HOG0000003	Lodge	PS_chr04_G015738	Scots	PS_chr12_G050780	2.49e-13	1.09e-06	1.09e-06
N1.HOG0000003	Lodge	PS_chr10_G044116	Scots	PS_chr07_G030691	1.34e-06	1.81e-10	1.34e-06
N1.HOG0000003	Lodge	PS_chr06_G025736	Scots	PS_chr06_G024331	1.45e-06	4.17e-16	1.45e-06
N1.HOG0000003	Lodge	PS_sUP1909_G057581	Scots	PS_chr12_G049656	1.52e-06	5.03e-09	1.52e-06
N1.HOG0000003	Lodge	PS_chr10_G044116	Scots	PS_chr01_G002237	8.72e-08	2.14e-06	2.14e-06
N1.HOG0000003	Lodge	PS_chr06_G025736	Scots	PS_chr07_G030691	2.02e-07	3.18e-06	3.18e-06
N1.HOG0000003	Lodge	PS_chr10_G044116	Scots	PS_chr10_G042628	4.13e-06	5.07e-06	5.07e-06
N1.HOG0000003	Lodge	PS_chr10_G042628	Scots	PS_chr10_G041863	5.15e-06	6.38e-08	5.15e-06
N1.HOG0000003	Lodge	PS_chr10_G041863	Scots	PS_chr10_G044114	5.45e-06	1.54e-13	5.45e-06
N1.HOG0000003	Lodge	PS_chr06_G024331	Scots	PS_chr01_G001415	3.81e-15	5.81e-06	5.81e-06
N1.HOG0000003	Lodge	PS_chr01_G001415	Scots	PS_chr10_G044116	6.16e-06	7.40e-10	6.16e-06
N1.HOG0000003	Lodge	PS_chr09_G037691	Scots	PS_chr10_G042228	7.88e-10	6.38e-06	6.38e-06
N1.HOG0000003	Lodge	PS_chr09_G037691	Scots	PS_chr06_G025736	1.35e-19	6.43e-06	6.43e-06
N1.HOG0000003	Lodge	PS_chr10_G044116	Scots	PS_chr12_G050780	1.10e-06	7.21e-06	7.21e-06
N1.HOG0000003	Lodge	PS_chr06_G025736	Scots	PS_chr04_G015738	7.34e-06	6.87e-06	7.34e-06
N1.HOG0000003	Lodge	PS_chr09_G037691	Scots	PS_chr12_G050780	8.34e-14	7.91e-06	7.91e-06
N1.HOG0000003	Lodge	PS_sUP1909_G057581	Scots	PS_chr10_G042228	5.65e-09	8.45e-06	8.45e-06
N1.HOG0000003	Lodge	PS_chr01_G001415	Scots	PS_chr10_G042628	7.82e-12	9.33e-06	9.33e-06
N1.HOG0000003	Lodge	PS_chr07_G030691	Scots	PS_chr12_G050780	1.11e-05	2.67e-06	1.11e-05
N1.HOG0000003	Lodge	PS_chr10_G041863	Scots	PS_chr10_G044115	1.23e-05	1.81e-09	1.23e-05
N1.HOG0000003	Lodge	PS_chr11_G045002	Scots	PS_chr10_G042228	1.29e-05	2.86e-06	1.29e-05
N1.HOG0000003	Lodge	PS_chr10_G041863	Scots	PS_chr12_G050780	1.29e-05	3.77e-06	1.29e-05
N1.HOG0000003	Lodge	PS_sUP1909_G057581	Scots	PS_chr01_G002237	7.61e-06	1.30e-05	1.3e-05
N1.HOG0000003	Lodge	PS_chr12_G050780	Scots	PS_chr01_G002237	6.15e-10	1.48e-05	1.48e-05
N1.HOG0000003	Lodge	PS_chr10_G042628	Scots	PS_chr10_G044115	1.51e-05	1.58e-07	1.51e-05
N1.HOG0000003	Lodge	PS_chr06_G025736	Scots	PS_chr12_G049656	6.91e-07	1.57e-05	1.57e-05
N1.HOG0000003	Lodge	PS_chr11_G045002	Scots	PS_chr01_G002237	1.71e-05	1.14e-05	1.71e-05
N1.HOG0000003	Lodge	PS_chr10_G041868	Scots	PS_chr10_G042228	1.89e-05	2.72e-06	1.89e-05
N1.HOG0000003	Lodge	PS_chr12_G049656	Scots	PS_chr10_G042228	4.16e-11	2.03e-05	2.03e-05
N1.HOG0000003	Lodge	PS_chr10_G041863	Scots	PS_chr05_G021617	2.31e-05	4.62e-12	2.31e-05
N1.HOG0000003	Lodge	PS_chr12_G049656	Scots	PS_chr07_G030691	8.67e-08	2.31e-05	2.31e-05
N1.HOG0000003	Lodge	PS_chr10_G041868	Scots	PS_chr12_G050780	1.52e-06	2.37e-05	2.37e-05
N1.HOG0000003	Lodge	PS_chr05_G021617	Scots	PS_chr01_G002237	8.79e-07	2.52e-05	2.52e-05
N1.HOG0000003	Lodge	PS_chr11_G045002	Scots	PS_chr10_G044116	2.98e-05	9.34e-11	2.98e-05
N1.HOG0000003	Lodge	PS_chr06_G024332	Scots	PS_chr12_G050780	3.45e-05	2.72e-06	3.45e-05
N1.HOG0000003	Lodge	PS_chr10_G041868	Scots	PS_chr12_G049656	4.11e-05	1.96e-08	4.11e-05
N1.HOG0000003	Lodge	PS_chr10_G044116	Scots	PS_chr12_G049656	3.61e-05	4.52e-05	4.52e-05
N1.HOG0000003	Lodge	PS_chr04_G015738	Scots	PS_chr10_G042628	2.44e-08	5.02e-05	5.02e-05
N1.HOG0000003	Lodge	PS_chr12_G050780	Scots	PS_chr01_G002233	2.49e-11	6.83e-05	6.83e-05
N1.HOG0000003	Lodge	PS_chr06_G024332	Scots	PS_chr10_G041863	7.84e-05	1.11e-05	7.84e-05
N1.HOG0000003	Lodge	PS_chr07_G030691	Scots	PS_chr10_G044116	8.87e-05	1.03e-08	8.87e-05
N1.HOG0000003	Lodge	PS_chr10_G041863	Scots	PS_chr01_G001415	1.28e-06	9.03e-05	9.03e-05
N1.HOG0000003	Lodge	PS_chr10_G044115	Scots	PS_chr05_G021617	9.46e-05	1.80e-16	9.46e-05
N1.HOG0000003	Lodge	PS_chr10_G042628	Scots	PS_chr12_G049656	1.33e-04	8.59e-05	0.000133
N1.HOG0000003	Lodge	PS_chr01_G001415	Scots	PS_chr01_G002237	2.48e-06	1.34e-04	0.000134
N1.HOG0000003	Lodge	PS_chr11_G045002	Scots	PS_chr07_G030691	1.40e-04	6.08e-06	0.00014
N1.HOG0000003	Lodge	PS_chr06_G024331	Scots	PS_chr10_G042628	9.83e-09	1.51e-04	0.000151
N1.HOG0000003	Lodge	PS_chr06_G024332	Scots	PS_chr10_G041868	2.25e-04	5.82e-08	0.000225
N1.HOG0000003	Lodge	PS_chr06_G024331	Scots	PS_chr06_G025736	2.92e-04	2.83e-04	0.000292
N1.HOG0000003	Lodge	PS_chr05_G021617	Scots	PS_chr10_G042628	3.25e-06	3.05e-04	0.000305
N1.HOG0000003	Lodge	PS_chr06_G024332	Scots	PS_chr10_G044114	3.27e-04	5.93e-08	0.000327
N1.HOG0000003	Lodge	PS_chr06_G025736	Scots	PS_chr01_G002233	7.71e-08	4.53e-04	0.000453
N1.HOG0000003	Lodge	PS_chr10_G044115	Scots	PS_chr10_G044115	4.61e-04	1.66e-07	0.000461
N1.HOG0000003	Lodge	PS_chr12_G049656	Scots	PS_chr12_G052894	4.97e-06	5.69e-04	0.000569
N1.HOG0000003	Lodge	PS_chr10_G041863	Scots	PS_chr07_G030691	6.10e-04	1.66e-07	0.00061
N1.HOG0000003	Lodge	PS_chr10_G041868	Scots	PS_chr06_G025736	6.97e-04	1.34e-04	0.000697
N1.HOG0000003	Lodge	PS_chr01_G001415	Scots	PS_chr12_G052894	4.38e-08	8.06e-04	0.000806
N1.HOG0000003	Lodge	PS_chr06_G024331	Scots	PS_chr01_G002237	1.62e-07	8.78e-04	0.000878
N1.HOG0000003	Lodge	PS_chr10_G044115	Scots	PS_chr10_G044114	1.01e-03	9.64e-09	0.00101
N1.HOG0000003	Lodge	PS_chr06_G025736	Scots	PS_chr06_G025736	1.36e-05	1.20e-03	0.0012
N1.HOG0000003	Lodge	PS_chr10_G042628	Scots	PS_chr06_G024331	1.29e-03	1.08e-13	0.00129
N1.HOG0000003	Lodge	PS_chr04_G015738	Scots	PS_chr01_G002237	2.16e-07	1.32e-03	0.00132
N1.HOG0000003	Lodge	PS_chr06_G025736	Scots	PS_chr05_G021617	1.33e-03	8.84e-09	0.00133
N1.HOG0000003	Lodge	PS_chr10_G044115	Scots	PS_chr11_G045002	1.40e-03	7.03e-13	0.0014
N1.HOG0000003	Lodge	PS_chr06_G025736	Scots	PS_chr12_G050780	9.14e-08	1.44e-03	0.00144
N1.HOG0000003	Lodge	PS_chr10_G044115	Scots	PS_chr10_G041863	1.61e-03	2.42e-05	0.00161
N1.HOG0000003	Lodge	PS_chr06_G024332	Scots	PS_chr10_G042228	1.58e-04	1.66e-03	0.00166
N1.HOG0000003	Lodge	PS_chr06_G024332	Scots	PS_chr11_G045002	1.66e-03	1.99e-07	0.00166
N1.HOG0000003	Lodge	PS_chr06_G024332	Scots	PS_chr01_G002237	1.71e-03	1.94e-04	0.00171
N1.HOG0000003	Lodge	PS_chr10_G044115	Scots	PS_chr12_G050780	1.94e-03	7.02e-05	0.00194
N1.HOG0000003	Lodge	PS_chr10_G042628	Scots	PS_chr10_G042228	2.07e-03	3.17e-04	0.00207
N1.HOG0000003	Lodge	PS_chr10_G044115	Scots	PS_chr06_G024331	2.28e-03	2.18e-19	0.00228
N1.HOG0000003	Lodge	PS_chr06_G025736	Scots	PS_chr10_G041868	2.56e-03	5.71e-05	0.00256
N1.HOG0000003	Lodge	PS_chr11_G045002	Scots	PS_chr12_G049656	3.16e-03	2.64e-04	0.00316
N1.HOG0000003	Lodge	PS_chr10_G044115	Scots	PS_chr10_G042228	5.43e-04	3.46e-03	0.00346
N1.HOG0000003	Lodge	PS_chr10_G041863	Scots	PS_chr10_G042228	4.10e-03	4.01e-04	0.0041
N1.HOG0000003	Lodge	PS_chr10_G041863	Scots	PS_chr06_G025736	3.35e-03	4.24e-03	0.00424
N1.HOG0000003	Lodge	PS_chr06_G024331	Scots	PS_chr01_G002233	9.62e-08	4.40e-03	0.0044
N1.HOG0000003	Lodge	PS_chr06_G024332	Scots	PS_chr05_G021617	5.41e-03	2.31e-13	0.00541
N1.HOG0000003	Lodge	PS_sUP1909_G057581	Scots	PS_chr07_G030691	1.22e-03	5.53e-03	0.00553
N1.HOG0000003	Lodge	PS_chr10_G042628	Scots	PS_chr10_G044114	6.08e-03	1.35e-05	0.00608
N1.HOG0000003	Lodge	PS_chr09_G037691	Scots	PS_chr01_G001415	3.62e-14	6.59e-03	0.00659
N1.HOG0000003	Lodge	PS_chr06_G025736	Scots	PS_chr01_G002237	3.09e-03	6.64e-03	0.00664
N1.HOG0000003	Lodge	PS_chr10_G044115	Scots	PS_chr01_G001415	1.37e-03	6.71e-03	0.00671
N1.HOG0000003	Lodge	PS_chr10_G041863	Scots	PS_chr01_G002237	8.05e-03	5.22e-03	0.00805
N1.HOG0000003	Lodge	PS_chr07_G030691	Scots	PS_chr12_G049656	8.20e-03	1.98e-04	0.0082
N1.HOG0000003	Lodge	PS_chr10_G041868	Scots	PS_chr07_G030691	8.82e-03	1.02e-05	0.00882
N1.HOG0000003	Lodge	PS_chr06_G024332	Scots	PS_chr06_G024331	9.09e-03	7.84e-13	0.00909
N1.HOG0000003	Lodge	PS_chr12_G050780	Scots	PS_chr12_G052894	8.65e-08	9.83e-03	0.00983
N1.HOG0000003	Lodge	PS_chr11_G045002	Scots	PS_chr10_G042628	8.57e-04	1.04e-02	0.0104
N1.HOG0000003	Lodge	PS_chr11_G045002	Scots	PS_chr06_G025736	1.16e-02	3.31e-04	0.0116
N1.HOG0000003	Lodge	PS_chr06_G024332	Scots	PS_chr04_G015738	1.23e-02	1.37e-05	0.0123
N1.HOG0000003	Lodge	PS_chr10_G041863	Scots	PS_chr10_G042628	1.27e-02	8.64e-03	0.0127
N1.HOG0000003	Lodge	PS_chr01_G001415	Scots	PS_chr07_G030691	1.88e-03	1.43e-02	0.0143
N1.HOG0000003	Lodge	PS_chr12_G049656	Scots	PS_chr01_G002237	2.86e-07	1.46e-02	0.0146
N1.HOG0000003	Lodge	PS_chr10_G042628	Scots	PS_chr05_G021617	1.50e-02	1.79e-10	0.015
N1.HOG0000003	Lodge	PS_chr10_G044115	Scots	PS_chr12_G052894	1.45e-03	1.66e-02	0.0166
N1.HOG0000003	Lodge	PS_chr10_G044116	Scots	PS_chr01_G001415	1.67e-03	1.68e-02	0.0168
N1.HOG0000003	Lodge	PS_chr10_G042628	Scots	PS_chr10_G041868	1.76e-02	2.16e-05	0.0176
N1.HOG0000003	Lodge	PS_chr10_G044116	Scots	PS_chr01_G002233	1.23e-02	1.79e-02	0.0179
N1.HOG0000003	Lodge	PS_chr10_G044115	Scots	PS_chr04_G015738	1.87e-02	8.70e-05	0.0187
N1.HOG0000003	Lodge	PS_chr04_G015738	Scots	PS_chr06_G025736	9.39e-07	1.98e-02	0.0198
N1.HOG0000003	Lodge	PS_chr05_G021617	Scots	PS_chr12_G052894	9.01e-04	2.10e-02	0.021
N1.HOG0000003	Lodge	PS_chr10_G044115	Scots	PS_chr10_G044116	2.21e-02	5.83e-06	0.0221
N1.HOG0000003	Lodge	PS_chr10_G041868	Scots	PS_chr01_G002237	9.48e-03	2.25e-02	0.0225
N1.HOG0000003	Lodge	PS_chr09_G037691	Scots	PS_chr01_G002233	3.28e-09	2.42e-02	0.0242
N1.HOG0000003	Lodge	PS_chr10_G044115	Scots	PS_chr12_G049656	2.59e-02	5.01e-03	0.0259
N1.HOG0000003	Lodge	PS_chr10_G041863	Scots	PS_chr12_G049656	2.75e-02	4.55e-04	0.0275
N1.HOG0000003	Lodge	PS_chr10_G042628	Scots	PS_chr04_G015738	2.82e-02	1.02e-03	0.0282
N1.HOG0000003	Lodge	PS_chr06_G024332	Scots	PS_chr10_G044115	3.22e-02	1.34e-05	0.0322
N1.HOG0000003	Lodge	PS_chr09_G037691	Scots	PS_chr01_G002237	1.20e-04	3.23e-02	0.0323
N1.HOG0000003	Lodge	PS_chr11_G045002	Scots	PS_chr01_G001415	4.64e-03	3.38e-02	0.0338
N1.HOG0000003	Lodge	PS_chr04_G015738	Scots	PS_chr01_G002233	1.25e-09	3.70e-02	0.037
N1.HOG0000003	Lodge	PS_chr10_G044115	Scots	PS_chr01_G002237	1.07e-02	3.91e-02	0.0391
N1.HOG0000003	Lodge	PS_chr10_G042628	Scots	PS_chr12_G052894	2.12e-03	3.95e-02	0.0395
N1.HOG0000003	Lodge	PS_chr10_G041863	Scots	PS_chr01_G002233	4.00e-02	3.91e-02	0.04
N1.HOG0000003	Lodge	PS_chr11_G045002	Scots	PS_chr01_G002233	3.31e-03	4.19e-02	0.0419
N1.HOG0000003	Lodge	PS_chr06_G024332	Scots	PS_chr01_G001415	1.62e-02	4.29e-02	0.0429
N1.HOG0000003	Lodge	PS_chr10_G042628	Scots	PS_chr10_G044116	4.41e-02	1.26e-06	0.0441
N1.HOG0000003	Lodge	PS_chr12_G049656	Scots	PS_chr10_G042628	3.33e-07	4.42e-02	0.0442
N1.HOG0000003	Lodge	PS_chr10_G042628	Scots	PS_chr09_G037690	4.48e-02	2.32e-07	0.0448
N1.HOG0000003	Lodge	PS_chr10_G044115	Scots	PS_chr09_G037690	4.60e-02	3.92e-10	0.046
N1.HOG0000003	Lodge	PS_chr04_G015738	Scots	PS_chr12_G052894	1.70e-04	4.68e-02	0.0468
N1.HOG0000003	Lodge	PS_chr10_G044115	Scots	PS_chr10_G041868	4.95e-02	2.33e-04	0.0495
N1.HOG0000003	Lodge	PS_chr07_G030691	Scots	PS_chr01_G001415	1.42e-04	5.03e-02	0.0503
N1.HOG0000003	Lodge	PS_chr06_G024332	Scots	PS_chr09_G037690	5.38e-02	1.23e-06	0.0538
N1.HOG0000003	Lodge	PS_chr05_G021617	Scots	PS_chr01_G002233	3.97e-02	6.43e-02	0.0643
N1.HOG0000003	Lodge	PS_chr06_G024331	Scots	PS_chr12_G052894	1.96e-08	7.25e-02	0.0725
N1.HOG0000003	Lodge	PS_chr06_G024332	Scots	PS_chr10_G044116	7.29e-02	1.47e-02	0.0729
N1.HOG0000003	Lodge	PS_chr10_G041868	Scots	PS_chr10_G042628	8.65e-03	7.46e-02	0.0746
N1.HOG0000003	Lodge	PS_chr10_G042628	Scots	PS_chr10_G042628	5.65e-03	7.71e-02	0.0771
N1.HOG0000003	Lodge	PS_chr10_G044115	Scots	PS_chr10_G042628	6.49e-03	8.06e-02	0.0806
N1.HOG0000003	Lodge	PS_chr10_G041868	Scots	PS_chr01_G002233	8.28e-02	8.42e-02	0.0842
N1.HOG0000003	Lodge	PS_chr06_G025736	Scots	PS_chr10_G042228	7.62e-04	8.63e-02	0.0863
N1.HOG0000003	Lodge	PS_sUP1909_G057581	Scots	PS_chr10_G042628	1.64e-02	9.83e-02	0.0983
N1.HOG0000003	Nor	PA_chr07_G001855	Scots	PS_chr09_G037690	1.67e-37	2.22e-42	1.67e-37
N1.HOG0000003	Nor	PA_chr07_G004123	Scots	PS_chr06_G024331	3.14e-37	1.39e-36	1.39e-36
N1.HOG0000003	Nor	PA_chr07_G001855	Scots	PS_chr06_G024331	5.31e-34	1.33e-46	5.31e-34
N1.HOG0000003	Nor	PA_chr07_G004123	Scots	PS_chr09_G037690	9.37e-37	5.17e-32	5.17e-32
N1.HOG0000003	Nor	PA_chr07_G001855	Scots	PS_chr04_G015738	1.56e-33	1.90e-28	1.9e-28
N1.HOG0000003	Nor	PA_chr07_G001855	Scots	PS_chr11_G045002	5.04e-30	1.23e-27	1.23e-27
N1.HOG0000003	Nor	PA_chr10_G002024	Scots	PS_chr09_G037690	2.98e-27	4.51e-37	2.98e-27
N1.HOG0000003	Nor	PA_chr10_G002024	Scots	PS_chr06_G024331	7.64e-27	9.01e-40	7.64e-27
N1.HOG0000003	Nor	PA_chr07_G001855	Scots	PS_chr10_G041868	7.65e-32	1.05e-24	1.05e-24
N1.HOG0000003	Nor	PA_chr07_G004123	Scots	PS_chr10_G044116	1.72e-26	1.06e-24	1.06e-24
N1.HOG0000003	Nor	PA_chr07_G001855	Scots	PS_chr10_G041863	3.96e-34	4.88e-24	4.88e-24
N1.HOG0000003	Nor	PA_chr10_G002024	Scots	PS_chr10_G041868	1.15e-27	6.00e-24	6e-24
N1.HOG0000003	Nor	PA_chr10_G002024	Scots	PS_chr04_G015738	4.75e-24	9.44e-24	9.44e-24
N1.HOG0000003	Nor	PA_chr07_G004123	Scots	PS_chr04_G015738	1.57e-37	1.43e-23	1.43e-23
N1.HOG0000003	Nor	PA_chr10_G001122	Scots	PS_chr06_G024331	1.75e-22	2.42e-31	1.75e-22
N1.HOG0000003	Nor	PA_chr07_G004123	Scots	PS_chr10_G041868	4.01e-38	4.89e-22	4.89e-22
N1.HOG0000003	Nor	PA_chr10_G002024	Scots	PS_chr11_G045002	1.83e-21	9.62e-25	1.83e-21
N1.HOG0000003	Nor	PA_chr07_G001855	Scots	PS_chr05_G021617	3.14e-27	5.60e-21	5.6e-21
N1.HOG0000003	Nor	PA_chr07_G004127	Scots	PS_chr06_G024331	5.15e-20	2.41e-43	5.15e-20
N1.HOG0000003	Nor	PA_chr04_G001602	Scots	PS_chr04_G015738	2.94e-19	6.12e-24	2.94e-19
N1.HOG0000003	Nor	PA_chr10_G002024	Scots	PS_chr05_G021617	2.51e-22	5.33e-19	5.33e-19
N1.HOG0000003	Nor	PA_chr10_G001122	Scots	PS_chr11_G045002	1.92e-19	1.07e-18	1.07e-18
N1.HOG0000003	Nor	PA_chr10_G001122	Scots	PS_chr05_G021617	8.08e-18	3.20e-18	8.08e-18
N1.HOG0000003	Nor	PA_chr04_G001602	Scots	PS_chr10_G041868	1.02e-17	5.31e-24	1.02e-17
N1.HOG0000003	Nor	PA_chr07_G004123	Scots	PS_chr11_G045002	1.58e-27	1.53e-17	1.53e-17
N1.HOG0000003	Nor	PA_chr10_G001122	Scots	PS_chr09_G037690	4.09e-17	1.43e-21	4.09e-17
N1.HOG0000003	Nor	PA_chr04_G001602	Scots	PS_chr09_G037690	4.90e-17	2.21e-28	4.9e-17
N1.HOG0000003	Nor	PA_chr07_G004127	Scots	PS_chr10_G044115	1.46e-17	4.98e-17	4.98e-17
N1.HOG0000003	Nor	PA_chr10_G001122	Scots	PS_chr10_G044115	7.88e-21	7.48e-17	7.48e-17
N1.HOG0000003	Nor	PA_chr10_G002024	Scots	PS_chr10_G044115	1.29e-26	8.07e-17	8.07e-17
N1.HOG0000003	Nor	PA_chr07_G004123	Scots	PS_chr10_G044115	1.78e-34	8.59e-17	8.59e-17
N1.HOG0000003	Nor	PA_chr10_G001113	Scots	PS_chr06_G024331	9.67e-17	2.73e-30	9.67e-17
N1.HOG0000003	Nor	PA_chr09_G001152	Scots	PS_chr10_G041868	2.91e-17	1.41e-16	1.41e-16
N1.HOG0000003	Nor	PA_chr07_G001855	Scots	PS_chr10_G044116	1.93e-16	3.21e-17	1.93e-16
N1.HOG0000003	Nor	PA_chr10_G002024	Scots	PS_chr10_G041863	1.51e-21	4.41e-16	4.41e-16
N1.HOG0000003	Nor	PA_chr04_G001602	Scots	PS_chr05_G021617	4.93e-16	2.11e-20	4.93e-16
N1.HOG0000003	Nor	PA_chr10_G001113	Scots	PS_chr04_G015738	6.84e-16	2.62e-17	6.84e-16
N1.HOG0000003	Nor	PA_chr04_G001602	Scots	PS_chr06_G024331	2.33e-15	9.02e-35	2.33e-15
N1.HOG0000003	Nor	PA_chr07_G001855	Scots	PS_chr10_G044114	4.76e-21	2.71e-15	2.71e-15
N1.HOG0000003	Nor	PA_chr11_G000133	Scots	PS_chr10_G044115	5.63e-17	2.80e-15	2.8e-15
N1.HOG0000003	Nor	PA_chr10_G002024	Scots	PS_chr10_G044116	3.72e-15	3.87e-22	3.72e-15
N1.HOG0000003	Nor	PA_chr07_G004127	Scots	PS_chr05_G021617	4.04e-15	2.76e-19	4.04e-15
N1.HOG0000003	Nor	PA_chr10_G003755	Scots	PS_chr04_G015738	4.31e-15	2.63e-19	4.31e-15
N1.HOG0000003	Nor	PA_chr07_G004127	Scots	PS_chr10_G041868	7.95e-15	6.15e-17	7.95e-15
N1.HOG0000003	Nor	PA_chr10_G003755	Scots	PS_chr06_G024331	1.64e-14	1.05e-32	1.64e-14
N1.HOG0000003	Nor	PA_chr07_G004123	Scots	PS_chr05_G021617	2.80e-26	2.42e-14	2.42e-14
N1.HOG0000003	Nor	PA_chr10_G001122	Scots	PS_chr04_G015738	9.76e-16	2.65e-14	2.65e-14
N1.HOG0000003	Nor	PA_chr10_G001113	Scots	PS_chr11_G045002	3.63e-14	5.72e-16	3.63e-14
N1.HOG0000003	Nor	PA_chr04_G001602	Scots	PS_chr10_G044115	4.66e-14	9.11e-16	4.66e-14
N1.HOG0000003	Nor	PA_chr07_G004127	Scots	PS_chr11_G045002	5.61e-14	7.17e-19	5.61e-14
N1.HOG0000003	Nor	PA_chr07_G001855	Scots	PS_chr10_G044115	2.37e-23	8.92e-14	8.92e-14
N1.HOG0000003	Nor	PA_chr10_G003755	Scots	PS_chr09_G037690	1.42e-13	1.35e-28	1.42e-13
N1.HOG0000003	Nor	PA_chr11_G000133	Scots	PS_chr10_G044114	5.49e-14	1.63e-13	1.63e-13
N1.HOG0000003	Nor	PA_chr07_G004127	Scots	PS_chr10_G041863	1.63e-13	1.75e-13	1.75e-13
N1.HOG0000003	Nor	PA_chr07_G004123	Scots	PS_chr10_G041863	2.91e-29	1.76e-13	1.76e-13
N1.HOG0000003	Nor	PA_chr10_G001113	Scots	PS_chr09_G037690	1.88e-13	2.74e-25	1.88e-13
N1.HOG0000003	Nor	PA_chr09_G001152	Scots	PS_chr06_G024331	2.12e-13	5.42e-27	2.12e-13
N1.HOG0000003	Nor	PA_chr10_G001113	Scots	PS_chr05_G021617	2.35e-14	3.23e-13	3.23e-13
N1.HOG0000003	Nor	PA_chr10_G001113	Scots	PS_chr10_G044115	1.03e-19	3.97e-13	3.97e-13
N1.HOG0000003	Nor	PA_chr10_G001113	Scots	PS_chr10_G041868	3.20e-14	4.63e-13	4.63e-13
N1.HOG0000003	Nor	PA_chr10_G001113	Scots	PS_chr10_G044114	3.22e-18	1.14e-12	1.14e-12
N1.HOG0000003	Nor	PA_chr07_G004127	Scots	PS_chr10_G044114	1.14e-12	2.63e-13	1.14e-12
N1.HOG0000003	Nor	PA_chr10_G003755	Scots	PS_chr10_G041868	1.24e-12	2.90e-16	1.24e-12
N1.HOG0000003	Nor	PA_chr07_G004127	Scots	PS_chr04_G015738	1.44e-12	7.24e-16	1.44e-12
N1.HOG0000003	Nor	PA_chr11_G000133	Scots	PS_chr10_G041868	1.87e-12	3.49e-13	1.87e-12
N1.HOG0000003	Nor	PA_chr10_G001122	Scots	PS_chr10_G044114	1.89e-13	1.97e-12	1.97e-12
N1.HOG0000003	Nor	PA_chr10_G001122	Scots	PS_chr10_G041863	1.78e-19	3.62e-12	3.62e-12
N1.HOG0000003	Nor	PA_chr07_G004127	Scots	PS_chr09_G037690	4.53e-12	1.40e-22	4.53e-12
N1.HOG0000003	Nor	PA_chr04_G001602	Scots	PS_chr11_G045002	5.07e-12	2.70e-18	5.07e-12
N1.HOG0000003	Nor	PA_chr07_G001855	Scots	PS_chr01_G001415	1.15e-24	1.29e-11	1.29e-11
N1.HOG0000003	Nor	PA_chr11_G000133	Scots	PS_chr05_G021617	1.97e-11	1.04e-13	1.97e-11
N1.HOG0000003	Nor	PA_chr07_G004123	Scots	PS_chr10_G044114	1.24e-27	1.99e-11	1.99e-11
N1.HOG0000003	Nor	PA_chr11_G000133	Scots	PS_chr06_G024331	2.10e-11	5.41e-29	2.1e-11
N1.HOG0000003	Nor	PA_chr10_G002024	Scots	PS_chr12_G049656	1.38e-11	2.51e-11	2.51e-11
N1.HOG0000003	Nor	PA_chr10_G001113	Scots	PS_chr10_G042228	1.51e-19	2.69e-11	2.69e-11
N1.HOG0000003	Nor	PA_chr11_G000133	Scots	PS_chr04_G015738	2.70e-11	1.34e-13	2.7e-11
N1.HOG0000003	Nor	PA_chr10_G001113	Scots	PS_chr10_G041863	4.48e-15	3.58e-11	3.58e-11
N1.HOG0000003	Nor	PA_chr11_G000133	Scots	PS_chr09_G037690	5.70e-11	8.87e-23	5.7e-11
N1.HOG0000003	Nor	PA_chr04_G001602	Scots	PS_chr10_G044114	6.06e-11	4.26e-14	6.06e-11
N1.HOG0000003	Nor	PA_chr10_G002026	Scots	PS_chr06_G024331	6.57e-11	3.50e-26	6.57e-11
N1.HOG0000003	Nor	PA_chr04_G001602	Scots	PS_chr10_G041863	6.83e-11	1.45e-11	6.83e-11
N1.HOG0000003	Nor	PA_chr10_G003755	Scots	PS_chr10_G044115	8.57e-11	8.78e-12	8.57e-11
N1.HOG0000003	Nor	PA_chr07_G004127	Scots	PS_chr10_G042228	4.10e-16	2.65e-10	2.65e-10
N1.HOG0000003	Nor	PA_chr09_G001152	Scots	PS_chr10_G041863	2.67e-10	5.58e-11	2.67e-10
N1.HOG0000003	Nor	PA_chr04_G001602	Scots	PS_chr10_G042228	2.38e-10	2.88e-10	2.88e-10
N1.HOG0000003	Nor	PA_chr10_G001122	Scots	PS_chr10_G041868	3.66e-15	3.11e-10	3.11e-10
N1.HOG0000003	Nor	PA_chr10_G001122	Scots	PS_chr10_G044116	7.63e-11	3.19e-10	3.19e-10
N1.HOG0000003	Nor	PA_chr11_G000133	Scots	PS_chr11_G045002	3.43e-10	3.59e-16	3.43e-10
N1.HOG0000003	Nor	PA_chr07_G001855	Scots	PS_chr10_G042228	1.96e-20	4.00e-10	4e-10
N1.HOG0000003	Nor	PA_chr09_G001152	Scots	PS_chr04_G015738	4.49e-10	3.88e-12	4.49e-10
N1.HOG0000003	Nor	PA_chr10_G002026	Scots	PS_chr10_G044116	5.86e-10	4.05e-15	5.86e-10
N1.HOG0000003	Nor	PA_chr09_G001152	Scots	PS_chr10_G044114	6.71e-10	1.16e-11	6.71e-10
N1.HOG0000003	Nor	PA_chr10_G003756	Scots	PS_chr04_G015738	1.21e-09	1.58e-15	1.21e-09
N1.HOG0000003	Nor	PA_chr10_G003755	Scots	PS_chr05_G021617	1.24e-09	1.16e-14	1.24e-09
N1.HOG0000003	Nor	PA_chr09_G001152	Scots	PS_chr10_G044115	8.35e-10	1.47e-09	1.47e-09
N1.HOG0000003	Nor	PA_chr10_G002026	Scots	PS_chr10_G044115	1.62e-09	2.51e-10	1.62e-09
N1.HOG0000003	Nor	PA_chr10_G003756	Scots	PS_chr06_G024331	2.18e-09	8.29e-29	2.18e-09
N1.HOG0000003	Nor	PA_chr10_G002026	Scots	PS_chr09_G037690	2.35e-09	2.16e-23	2.35e-09
N1.HOG0000003	Nor	PA_chr11_G000133	Scots	PS_chr10_G044116	3.11e-09	1.25e-13	3.11e-09
N1.HOG0000003	Nor	PA_chr09_G001152	Scots	PS_chr09_G037690	3.20e-09	8.29e-17	3.2e-09
N1.HOG0000003	Nor	PA_chr10_G002024	Scots	PS_chr10_G044114	8.03e-18	3.56e-09	3.56e-09
N1.HOG0000003	Nor	PA_chr09_G001152	Scots	PS_chr10_G042228	1.99e-12	4.21e-09	4.21e-09
N1.HOG0000003	Nor	PA_chr07_G001855	Scots	PS_chr07_G030691	4.47e-14	7.57e-09	7.57e-09
N1.HOG0000003	Nor	PA_chr10_G002026	Scots	PS_chr04_G015738	1.38e-08	2.35e-11	1.38e-08
N1.HOG0000003	Nor	PA_chr10_G002024	Scots	PS_chr12_G050780	7.25e-15	1.76e-08	1.76e-08
N1.HOG0000003	Nor	PA_chr11_G000133	Scots	PS_chr10_G042228	6.96e-15	1.81e-08	1.81e-08
N1.HOG0000003	Nor	PA_chr07_G001853	Scots	PS_chr05_G021617	2.19e-08	3.12e-16	2.19e-08
N1.HOG0000003	Nor	PA_chr10_G003756	Scots	PS_chr10_G044115	2.20e-08	1.37e-14	2.2e-08
N1.HOG0000003	Nor	PA_chr09_G001152	Scots	PS_chr05_G021617	3.22e-08	2.98e-11	3.22e-08
N1.HOG0000003	Nor	PA_chr07_G001853	Scots	PS_chr06_G024331	3.35e-08	6.58e-30	3.35e-08
N1.HOG0000003	Nor	PA_chr07_G004123	Scots	PS_chr10_G042228	3.37e-19	4.06e-08	4.06e-08
N1.HOG0000003	Nor	PA_chr10_G003755	Scots	PS_chr10_G044116	4.46e-08	2.36e-19	4.46e-08
N1.HOG0000003	Nor	PA_chr10_G003755	Scots	PS_chr10_G041863	4.92e-08	1.50e-08	4.92e-08
N1.HOG0000003	Nor	PA_chr10_G002026	Scots	PS_chr11_G045002	5.92e-08	2.96e-13	5.92e-08
N1.HOG0000003	Nor	PA_chr10_G001113	Scots	PS_chr07_G030691	9.90e-14	6.40e-08	6.4e-08
N1.HOG0000003	Nor	PA_chr07_G001855	Scots	PS_chr12_G049656	1.55e-08	9.12e-08	9.12e-08
N1.HOG0000003	Nor	PA_chr10_G002026	Scots	PS_chr10_G041868	9.80e-08	1.09e-11	9.8e-08
N1.HOG0000003	Nor	PA_chr07_G001853	Scots	PS_chr10_G041868	1.23e-07	3.43e-14	1.23e-07
N1.HOG0000003	Nor	PA_chr10_G003756	Scots	PS_chr10_G041868	1.31e-07	1.55e-11	1.31e-07
N1.HOG0000003	Nor	PA_chr10_G003756	Scots	PS_chr10_G041863	1.38e-07	7.13e-09	1.38e-07
N1.HOG0000003	Nor	PA_chr04_G001602	Scots	PS_chr10_G044116	1.49e-07	9.44e-09	1.49e-07
N1.HOG0000003	Nor	PA_chr11_G000133	Scots	PS_chr10_G041863	1.99e-08	1.76e-07	1.76e-07
N1.HOG0000003	Nor	PA_chr09_G001152	Scots	PS_chr11_G045002	2.08e-07	1.96e-12	2.08e-07
N1.HOG0000003	Nor	PA_chr07_G001853	Scots	PS_chr04_G015738	2.69e-07	1.00e-14	2.69e-07
N1.HOG0000003	Nor	PA_chr07_G001853	Scots	PS_chr10_G044115	3.73e-07	8.47e-13	3.73e-07
N1.HOG0000003	Nor	PA_chr10_G003756	Scots	PS_chr10_G044114	4.70e-07	7.84e-09	4.7e-07
N1.HOG0000003	Nor	PA_chr10_G001122	Scots	PS_chr12_G049656	1.20e-08	6.85e-07	6.85e-07
N1.HOG0000003	Nor	PA_chr07_G004123	Scots	PS_chr01_G001415	1.17e-16	7.66e-07	7.66e-07
N1.HOG0000003	Nor	PA_chr11_G000133	Scots	PS_chr07_G030691	9.30e-07	1.70e-08	9.3e-07
N1.HOG0000003	Nor	PA_chr10_G002024	Scots	PS_chr07_G030691	4.82e-10	9.78e-07	9.78e-07
N1.HOG0000003	Nor	PA_chr07_G004123	Scots	PS_chr12_G049656	6.46e-11	1.09e-06	1.09e-06
N1.HOG0000003	Nor	PA_chr10_G003756	Scots	PS_chr05_G021617	1.28e-06	2.61e-15	1.28e-06
N1.HOG0000003	Nor	PA_chr10_G002024	Scots	PS_chr10_G042228	1.47e-09	1.31e-06	1.31e-06
N1.HOG0000003	Nor	PA_chr10_G002026	Scots	PS_chr05_G021617	1.55e-06	3.29e-12	1.55e-06
N1.HOG0000003	Nor	PA_chr10_G003756	Scots	PS_chr10_G042228	9.93e-09	1.62e-06	1.62e-06
N1.HOG0000003	Nor	PA_chr10_G001113	Scots	PS_chr10_G044116	1.68e-06	1.90e-13	1.68e-06
N1.HOG0000003	Nor	PA_chr10_G002026	Scots	PS_chr10_G042228	1.83e-06	6.98e-07	1.83e-06
N1.HOG0000003	Nor	PA_chr11_G000133	Scots	PS_chr12_G049656	1.45e-06	2.72e-06	2.72e-06
N1.HOG0000003	Nor	PA_chr10_G003756	Scots	PS_chr09_G037690	3.42e-06	8.54e-19	3.42e-06
N1.HOG0000003	Nor	PA_chr10_G003755	Scots	PS_chr11_G045002	3.66e-06	9.22e-14	3.66e-06
N1.HOG0000003	Nor	PA_chr07_G004123	Scots	PS_chr07_G030691	2.73e-16	3.73e-06	3.73e-06
N1.HOG0000003	Nor	PA_chr10_G003756	Scots	PS_chr11_G045002	5.03e-06	9.17e-15	5.03e-06
N1.HOG0000003	Nor	PA_chr07_G004127	Scots	PS_chr10_G044116	8.09e-06	4.06e-07	8.09e-06
N1.HOG0000003	Nor	PA_chr07_G004127	Scots	PS_chr12_G049656	8.82e-08	8.90e-06	8.9e-06
N1.HOG0000003	Nor	PA_chr10_G002026	Scots	PS_chr10_G041863	9.75e-06	2.20e-06	9.75e-06
N1.HOG0000003	Nor	PA_chr07_G001855	Scots	PS_chr12_G050780	3.84e-14	1.06e-05	1.06e-05
N1.HOG0000003	Nor	PA_chr07_G001853	Scots	PS_chr10_G044116	1.09e-05	8.47e-13	1.09e-05
N1.HOG0000003	Nor	PA_chr10_G001122	Scots	PS_chr10_G042228	1.83e-13	1.37e-05	1.37e-05
N1.HOG0000003	Nor	PA_chr10_G003755	Scots	PS_chr10_G042228	4.75e-06	1.47e-05	1.47e-05
N1.HOG0000003	Nor	PA_chr04_G001602	Scots	PS_chr12_G050780	2.39e-06	1.57e-05	1.57e-05
N1.HOG0000003	Nor	PA_chr07_G004127	Scots	PS_chr07_G030691	4.11e-10	1.60e-05	1.6e-05
N1.HOG0000003	Nor	PA_chr10_G003756	Scots	PS_chr01_G002237	5.34e-06	1.61e-05	1.61e-05
N1.HOG0000003	Nor	PA_chr07_G001853	Scots	PS_chr10_G042228	1.64e-05	6.72e-08	1.64e-05
N1.HOG0000003	Nor	PA_chr07_G004123	Scots	PS_chr12_G050780	3.18e-20	1.85e-05	1.85e-05
N1.HOG0000003	Nor	PA_chr10_G002026	Scots	PS_chr10_G044114	2.64e-05	7.42e-08	2.64e-05
N1.HOG0000003	Nor	PA_chr04_G001602	Scots	PS_chr12_G049656	2.65e-06	3.21e-05	3.21e-05
N1.HOG0000003	Nor	PA_chr10_G003755	Scots	PS_chr12_G050780	3.78e-05	4.59e-05	4.59e-05
N1.HOG0000003	Nor	PA_chr11_G000133	Scots	PS_chr01_G002237	3.05e-09	5.22e-05	5.22e-05
N1.HOG0000003	Nor	PA_chr04_G001602	Scots	PS_chr07_G030691	3.78e-09	6.48e-05	6.48e-05
N1.HOG0000003	Nor	PA_chr10_G003756	Scots	PS_chr10_G044116	6.64e-05	4.53e-12	6.64e-05
N1.HOG0000003	Nor	PA_chr10_G001122	Scots	PS_chr07_G030691	4.71e-08	6.74e-05	6.74e-05
N1.HOG0000003	Nor	PA_chr10_G003756	Scots	PS_chr07_G030691	1.14e-05	6.80e-05	6.8e-05
N1.HOG0000003	Nor	PA_chr07_G001853	Scots	PS_chr09_G037690	7.47e-05	2.76e-18	7.47e-05
N1.HOG0000003	Nor	PA_chr09_G001152	Scots	PS_chr12_G049656	8.23e-08	7.54e-05	7.54e-05
N1.HOG0000003	Nor	PA_chr10_G001122	Scots	PS_chr12_G050780	1.77e-10	7.97e-05	7.97e-05
N1.HOG0000003	Nor	PA_chr10_G003755	Scots	PS_chr10_G044114	8.68e-05	4.72e-08	8.68e-05
N1.HOG0000003	Nor	PA_chr04_G001602	Scots	PS_chr01_G002237	2.44e-07	1.13e-04	0.000113
N1.HOG0000003	Nor	PA_chr07_G001853	Scots	PS_chr10_G041863	1.16e-04	3.26e-08	0.000116
N1.HOG0000003	Nor	PA_chr10_G003756	Scots	PS_chr12_G050780	1.16e-04	1.16e-04	0.000116
N1.HOG0000003	Nor	PA_chr10_G002024	Scots	PS_chr01_G001415	1.15e-10	1.90e-04	0.00019
N1.HOG0000003	Nor	PA_chr10_G003755	Scots	PS_chr06_G025736	7.10e-05	2.51e-04	0.000251
N1.HOG0000003	Nor	PA_chr10_G001122	Scots	PS_chr01_G001415	2.88e-10	2.53e-04	0.000253
N1.HOG0000003	Nor	PA_chr11_G000133	Scots	PS_chr12_G050780	2.43e-08	2.69e-04	0.000269
N1.HOG0000003	Nor	PA_chr07_G001853	Scots	PS_chr10_G044114	2.76e-04	1.64e-10	0.000276
N1.HOG0000003	Nor	PA_chr07_G004127	Scots	PS_chr10_G042628	5.95e-08	2.94e-04	0.000294
N1.HOG0000003	Nor	PA_chr07_G004127	Scots	PS_chr01_G001415	1.08e-06	4.17e-04	0.000417
N1.HOG0000003	Nor	PA_chr10_G001113	Scots	PS_chr12_G049656	5.52e-08	4.62e-04	0.000462
N1.HOG0000003	Nor	PA_chr07_G001853	Scots	PS_chr12_G049656	4.85e-04	1.34e-05	0.000485
N1.HOG0000003	Nor	PA_chr07_G004127	Scots	PS_chr12_G050780	5.08e-08	5.52e-04	0.000552
N1.HOG0000003	Nor	PA_chr07_G001853	Scots	PS_chr01_G002237	9.28e-04	6.98e-04	0.000928
N1.HOG0000003	Nor	PA_chr10_G002026	Scots	PS_chr06_G025736	4.51e-05	1.13e-03	0.00113
N1.HOG0000003	Nor	PA_chr10_G002024	Scots	PS_chr06_G025736	3.25e-07	1.26e-03	0.00126
N1.HOG0000003	Nor	PA_chr10_G001113	Scots	PS_chr10_G042628	7.33e-05	1.39e-03	0.00139
N1.HOG0000003	Nor	PA_chr01_G003247	Scots	PS_chr07_G030691	1.43e-03	6.77e-06	0.00143
N1.HOG0000003	Nor	PA_chr09_G001152	Scots	PS_chr10_G042628	1.95e-04	1.95e-03	0.00195
N1.HOG0000003	Nor	PA_chr09_G001152	Scots	PS_chr12_G050780	4.05e-05	1.99e-03	0.00199
N1.HOG0000003	Nor	PA_chr07_G001853	Scots	PS_chr12_G050780	2.11e-03	2.04e-04	0.00211
N1.HOG0000003	Nor	PA_chr07_G001853	Scots	PS_chr11_G045002	2.49e-03	6.97e-14	0.00249
N1.HOG0000003	Nor	PA_chr10_G002024	Scots	PS_chr10_G042628	2.01e-05	2.70e-03	0.0027
N1.HOG0000003	Nor	PA_chr09_G001153	Scots	PS_chr12_G049656	2.18e-03	2.90e-03	0.0029
N1.HOG0000003	Nor	PA_chr07_G004127	Scots	PS_chr01_G002237	9.06e-08	3.05e-03	0.00305
N1.HOG0000003	Nor	PA_chr04_G001602	Scots	PS_chr01_G001415	7.37e-07	3.28e-03	0.00328
N1.HOG0000003	Nor	PA_chr10_G002026	Scots	PS_chr07_G030691	3.48e-03	5.39e-04	0.00348
N1.HOG0000003	Nor	PA_chr07_G001855	Scots	PS_chr10_G042628	7.72e-11	3.81e-03	0.00381
N1.HOG0000003	Nor	PA_chr10_G003755	Scots	PS_chr10_G042628	1.02e-04	4.23e-03	0.00423
N1.HOG0000003	Nor	PA_chr10_G001122	Scots	PS_chr10_G042628	4.26e-08	5.28e-03	0.00528
N1.HOG0000003	Nor	PA_chr01_G003247	Scots	PS_chr01_G002233	5.37e-03	2.42e-03	0.00537
N1.HOG0000003	Nor	PA_chr09_G001153	Scots	PS_chr10_G044114	5.68e-03	4.42e-04	0.00568
N1.HOG0000003	Nor	PA_chr10_G002026	Scots	PS_chr10_G042628	2.67e-05	6.23e-03	0.00623
N1.HOG0000003	Nor	PA_chr01_G003247	Scots	PS_chr10_G042228	6.38e-03	2.26e-06	0.00638
N1.HOG0000003	Nor	PA_chr10_G001122	Scots	PS_chr01_G002237	6.96e-10	6.52e-03	0.00652
N1.HOG0000003	Nor	PA_chr10_G001113	Scots	PS_chr12_G050780	4.44e-09	6.73e-03	0.00673
N1.HOG0000003	Nor	PA_chr10_G001113	Scots	PS_chr01_G002237	2.33e-08	7.57e-03	0.00757
N1.HOG0000003	Nor	PA_chr10_G003755	Scots	PS_chr12_G049656	8.40e-03	5.37e-03	0.0084
N1.HOG0000003	Nor	PA_chr07_G001853	Scots	PS_chr10_G042628	8.92e-03	1.39e-03	0.00892
N1.HOG0000003	Nor	PA_chr10_G003756	Scots	PS_chr12_G049656	9.48e-03	7.64e-03	0.00948
N1.HOG0000003	Nor	PA_chr07_G001853	Scots	PS_chr12_G052894	8.12e-03	9.71e-03	0.00971
N1.HOG0000003	Nor	PA_chr09_G001152	Scots	PS_chr07_G030691	2.91e-06	9.91e-03	0.00991
N1.HOG0000003	Nor	PA_chr10_G002026	Scots	PS_chr01_G002237	7.50e-05	1.15e-02	0.0115
N1.HOG0000003	Nor	PA_chr10_G003756	Scots	PS_chr01_G001415	1.30e-02	1.20e-02	0.013
N1.HOG0000003	Nor	PA_chr10_G002024	Scots	PS_chr01_G002233	2.98e-06	1.47e-02	0.0147
N1.HOG0000003	Nor	PA_chr11_G000133	Scots	PS_chr10_G042628	1.22e-06	1.56e-02	0.0156
N1.HOG0000003	Nor	PA_chr07_G004127	Scots	PS_chr01_G002233	1.13e-03	1.62e-02	0.0162
N1.HOG0000003	Nor	PA_chr07_G004127	Scots	PS_chr06_G024332	7.79e-05	1.70e-02	0.017
N1.HOG0000003	Nor	PA_chr10_G002024	Scots	PS_chr01_G002237	1.67e-09	1.75e-02	0.0175
N1.HOG0000003	Nor	PA_chr09_G001153	Scots	PS_chr10_G042228	1.90e-02	1.52e-02	0.019
N1.HOG0000003	Nor	PA_chr01_G003247	Scots	PS_chr06_G024331	2.20e-02	9.76e-12	0.022
N1.HOG0000003	Nor	PA_chr10_G002026	Scots	PS_chr12_G049656	8.58e-03	2.24e-02	0.0224
N1.HOG0000003	Nor	PA_chr07_G001855	Scots	PS_chr01_G002237	1.67e-13	2.67e-02	0.0267
N1.HOG0000003	Nor	PA_chr09_G001152	Scots	PS_chr12_G052894	3.37e-03	2.69e-02	0.0269
N1.HOG0000003	Nor	PA_chr09_G001153	Scots	PS_chr10_G044115	3.04e-02	1.12e-02	0.0304
N1.HOG0000003	Nor	PA_chr07_G001853	Scots	PS_chr07_G030691	3.19e-02	2.68e-02	0.0319
N1.HOG0000003	Nor	PA_chr09_G001152	Scots	PS_chr01_G001415	5.22e-04	3.23e-02	0.0323
N1.HOG0000003	Nor	PA_chr01_G003247	Scots	PS_chr01_G002237	3.27e-02	4.52e-03	0.0327
N1.HOG0000003	Nor	PA_chr09_G001153	Scots	PS_chr07_G030691	3.02e-02	3.27e-02	0.0327
N1.HOG0000003	Nor	PA_chr07_G004123	Scots	PS_chr01_G002237	1.58e-13	3.48e-02	0.0348
N1.HOG0000003	Nor	PA_chr07_G004123	Scots	PS_chr10_G042628	5.53e-07	4.01e-02	0.0401
N1.HOG0000003	Nor	PA_chr07_G001855	Scots	PS_chr01_G002233	1.64e-06	4.18e-02	0.0418
N1.HOG0000003	Nor	PA_chr10_G002026	Scots	PS_chr12_G050780	1.77e-05	4.68e-02	0.0468
N1.HOG0000003	Nor	PA_chr10_G001113	Scots	PS_chr01_G001415	3.78e-04	4.71e-02	0.0471
N1.HOG0000003	Nor	PA_chr09_G001152	Scots	PS_chr01_G002237	1.07e-03	4.91e-02	0.0491
N1.HOG0000003	Nor	PA_chr11_G000133	Scots	PS_chr01_G002233	3.63e-03	5.05e-02	0.0505
N1.HOG0000003	Nor	PA_chr09_G001152	Scots	PS_chr10_G044116	5.10e-02	3.94e-04	0.051
N1.HOG0000003	Nor	PA_chr01_G003247	Scots	PS_chr12_G049656	5.21e-02	1.82e-04	0.0521
N1.HOG0000003	Nor	PA_chr01_G003247	Scots	PS_chr10_G041868	5.33e-02	2.16e-06	0.0533
N1.HOG0000003	Nor	PA_chr10_G003756	Scots	PS_chr10_G042628	5.85e-02	6.29e-02	0.0629
N1.HOG0000003	Nor	PA_chr01_G003247	Scots	PS_chr10_G044116	6.37e-02	6.13e-07	0.0637
N1.HOG0000003	Nor	PA_chr07_G001853	Scots	PS_chr01_G002233	4.46e-05	6.56e-02	0.0656
N1.HOG0000003	Nor	PA_chr09_G001153	Scots	PS_chr11_G045002	6.88e-02	6.03e-02	0.0688
N1.HOG0000003	Nor	PA_chr07_G004123	Scots	PS_chr06_G025736	1.20e-06	7.10e-02	0.071
N1.HOG0000003	Nor	PA_chr01_G003247	Scots	PS_chr10_G041863	7.75e-02	1.25e-03	0.0775
N1.HOG0000003	Nor	PA_chr07_G001855	Scots	PS_chr06_G025736	5.78e-03	8.62e-02	0.0862
N1.HOG0000003	Nor	PA_chr10_G002026	Scots	PS_chr01_G002233	6.96e-03	8.64e-02	0.0864
N1.HOG0000003	Nor	PA_chr09_G001153	Scots	PS_chr05_G021617	8.70e-02	7.65e-02	0.087
N1.HOG0000003	Nor	PA_chr10_G003756	Scots	PS_chr01_G002233	5.36e-02	9.36e-02	0.0936
N1.HOG0000003	Nor	PA_chr09_G001153	Scots	PS_chr09_G037690	6.46e-02	9.49e-02	0.0949
N1.HOG0000003	Nor	PA_chr10_G001113	Scots	PS_chr01_G002233	2.49e-03	9.59e-02	0.0959
N1.HOG0000003	Nor	PA_chr07_G004123	Birch	Bpev01.c0568.g0010.m0001	7.53e-03	7.18e-03	0.00753
N1.HOG0000003	Nor	PA_chr07_G004123	Cher	FUN_026677-T1	4.19e-02	4.15e-02	0.0419
N1.HOG0000003	Nor	PA_chr10_G003755	Cher	FUN_026677-T1	4.38e-02	3.66e-02	0.0438
N1.HOG0000003	Nor	PA_chr04_G001602	Cher	FUN_026677-T1	6.59e-02	5.85e-02	0.0659
N1.HOG0000003	Nor	PA_chr01_G003247	Cher	FUN_026677-T1	7.79e-02	8.38e-02	0.0838
N1.HOG0000003	Nor	PA_chr10_G002026	Cher	FUN_026677-T1	9.47e-02	7.48e-02	0.0947
N1.HOG0000003	Nor	PA_chr10_G003756	Cher	FUN_026677-T1	8.68e-02	9.93e-02	0.0993
N1.HOG0000003	Scots	PS_chr01_G002237	Birch	Bpev01.c0568.g0010.m0001	1.13e-03	2.22e-03	0.00222
N1.HOG0000003	Scots	PS_chr10_G044115	Birch	Bpev01.c0568.g0010.m0001	7.24e-02	2.63e-02	0.0724
N1.HOG0000003	Scots	PS_chr10_G044115	Cher	FUN_026677-T1	4.33e-03	9.56e-04	0.00433
N1.HOG0000003	Scots	PS_chr05_G021617	Cher	FUN_026677-T1	6.13e-03	8.46e-03	0.00846
N1.HOG0000003	Birch	Bpev01.c0568.g0010.m0001	Cher	FUN_026677-T1	2.90e-02	3.77e-02	0.0377
N1.HOG0000004	Lodge	PS_chr02_G006441	Nor	PA_chr02_G001588	2.79e-07	7.95e-10	2.79e-07
N1.HOG0000004	Lodge	PS_chr02_G006441	Scots	PS_chr02_G006441	9.73e-12	4.16e-11	4.16e-11
N1.HOG0000004	Lodge	PS_chr02_G006441	Birch	Bpev01.c1815.g0006.m0001	1.04e-02	6.46e-04	0.0104
N1.HOG0000004	Nor	PA_chr02_G001588	Scots	PS_chr02_G006441	3.94e-11	8.35e-11	8.35e-11
N1.HOG0000004	Scots	PS_chr02_G006441	Birch	Bpev01.c1815.g0006.m0001	7.34e-02	1.17e-02	0.0734
N1.HOG0000005	Lodge	PS_chr10_G041862	Nor	PA_chr02_G000547	3.93e-24	2.60e-19	2.6e-19
N1.HOG0000005	Lodge	PS_sUP0013_G053195	Nor	PA_chr11_sUL004_G000002	1.16e-24	1.08e-18	1.08e-18
N1.HOG0000005	Lodge	PS_chr02_G009063	Nor	PA_chr10_G001112	4.61e-33	6.96e-17	6.96e-17
N1.HOG0000005	Lodge	PS_sUP0013_G053195	Nor	PA_chr10_G001112	1.09e-16	6.07e-18	1.09e-16
N1.HOG0000005	Lodge	PS_chr02_G009063	Nor	PA_chr02_G000547	1.88e-27	6.19e-16	6.19e-16
N1.HOG0000005	Lodge	PS_sUP2195_G057727	Nor	PA_chr02_G000547	1.77e-16	7.81e-16	7.81e-16
N1.HOG0000005	Lodge	PS_chr10_G041862	Nor	PA_chr10_G001112	1.62e-17	2.34e-15	2.34e-15
N1.HOG0000005	Lodge	PS_sUP0013_G053195	Nor	PA_chr02_G000547	2.66e-18	8.30e-15	8.3e-15
N1.HOG0000005	Lodge	PS_chr10_G041862	Nor	PA_chr11_sUL004_G000002	8.00e-19	1.10e-14	1.1e-14
N1.HOG0000005	Lodge	PS_chr02_G005498	Nor	PA_chr11_sUL004_G000002	2.89e-14	1.61e-22	2.89e-14
N1.HOG0000005	Lodge	PS_sUP0013_G053195	Nor	PA_chr01_G005795	3.35e-20	3.69e-14	3.69e-14
N1.HOG0000005	Lodge	PS_chr11_G045438	Nor	PA_chr11_sUL004_G000002	8.88e-18	4.10e-14	4.1e-14
N1.HOG0000005	Lodge	PS_sUP2195_G057727	Nor	PA_chr10_G001112	1.73e-17	8.25e-14	8.25e-14
N1.HOG0000005	Lodge	PS_chr11_G045438	Nor	PA_chr02_G000547	2.69e-15	1.37e-13	1.37e-13
N1.HOG0000005	Lodge	PS_chr11_G045438	Nor	PA_chr01_G005795	7.17e-17	2.89e-13	2.89e-13
N1.HOG0000005	Lodge	PS_chr02_G005498	Nor	PA_chr02_G000547	4.00e-13	3.51e-19	4e-13
N1.HOG0000005	Lodge	PS_chr11_G045438	Nor	PA_chr10_G001112	6.96e-13	8.18e-13	8.18e-13
N1.HOG0000005	Lodge	PS_chr02_G009063	Nor	PA_chr11_sUL004_G000002	1.94e-30	2.36e-12	2.36e-12
N1.HOG0000005	Lodge	PS_chr02_G005498	Nor	PA_chr10_G001112	8.87e-12	1.10e-21	8.87e-12
N1.HOG0000005	Lodge	PS_chr10_G041862	Nor	PA_chr01_G005795	7.94e-20	1.31e-10	1.31e-10
N1.HOG0000005	Lodge	PS_sUP2195_G057727	Nor	PA_chr11_sUL004_G000002	4.25e-18	6.07e-10	6.07e-10
N1.HOG0000005	Lodge	PS_chr02_G005498	Nor	PA_chr01_G005795	8.26e-10	3.58e-11	8.26e-10
N1.HOG0000005	Lodge	PS_chr07_G029164	Nor	PA_chr10_G001112	4.13e-11	7.48e-09	7.48e-09
N1.HOG0000005	Lodge	PS_sUP2195_G057727	Nor	PA_chr01_G005795	1.35e-14	1.35e-08	1.35e-08
N1.HOG0000005	Lodge	PS_chr01_G004178	Nor	PA_chr02_G000547	2.75e-08	3.08e-14	2.75e-08
N1.HOG0000005	Lodge	PS_chr01_G004178	Nor	PA_chr11_sUL004_G000002	2.51e-07	1.63e-12	2.51e-07
N1.HOG0000005	Lodge	PS_chr02_G009063	Nor	PA_chr01_G005795	7.03e-19	7.80e-07	7.8e-07
N1.HOG0000005	Lodge	PS_chr07_G029164	Nor	PA_chr02_G000547	1.01e-06	1.54e-05	1.54e-05
N1.HOG0000005	Lodge	PS_chr09_G039329	Nor	PA_chr11_sUL004_G000002	1.69e-05	1.24e-06	1.69e-05
N1.HOG0000005	Lodge	PS_chr01_G004178	Nor	PA_chr10_G001112	2.13e-05	9.95e-11	2.13e-05
N1.HOG0000005	Lodge	PS_chr09_G039329	Nor	PA_chr01_G005795	2.70e-05	1.52e-07	2.7e-05
N1.HOG0000005	Lodge	PS_chr06_G025436	Nor	PA_chr01_G005795	7.13e-05	4.46e-07	7.13e-05
N1.HOG0000005	Lodge	PS_chr09_G039329	Nor	PA_chr02_G000547	7.38e-05	2.02e-11	7.38e-05
N1.HOG0000005	Lodge	PS_chr01_G004178	Nor	PA_chr01_G005795	1.10e-04	6.07e-09	0.00011
N1.HOG0000005	Lodge	PS_chr09_G039329	Nor	PA_chr10_G001112	1.75e-04	1.43e-10	0.000175
N1.HOG0000005	Lodge	PS_chr06_G025436	Nor	PA_chr02_G000547	2.00e-04	1.71e-07	0.0002
N1.HOG0000005	Lodge	PS_chr06_G025436	Nor	PA_chr10_G001112	2.87e-04	9.67e-09	0.000287
N1.HOG0000005	Lodge	PS_chr06_G025436	Nor	PA_chr11_sUL004_G000002	2.30e-04	3.56e-04	0.000356
N1.HOG0000005	Lodge	PS_chr07_G029164	Nor	PA_chr11_sUL004_G000002	4.30e-07	1.59e-03	0.00159
N1.HOG0000005	Lodge	PS_chr09_G039329	Nor	PA_chr07_G002307	1.96e-06	1.66e-03	0.00166
N1.HOG0000005	Lodge	PS_chr10_G041862	Nor	PA_chr07_G002307	2.01e-13	8.42e-03	0.00842
N1.HOG0000005	Lodge	PS_chr07_G029164	Nor	PA_chr01_G005795	7.85e-05	1.63e-02	0.0163
N1.HOG0000005	Lodge	PS_chr06_G025436	Nor	PA_chr07_G002307	3.17e-03	3.23e-02	0.0323
N1.HOG0000005	Lodge	PS_sUP0013_G053195	Nor	PA_chr07_G002307	6.98e-12	3.39e-02	0.0339
N1.HOG0000005	Lodge	PS_chr02_G005498	Nor	PA_chr02_G004631	1.61e-04	7.28e-02	0.0728
N1.HOG0000005	Lodge	PS_chr01_G004178	Nor	PA_chr07_G002307	1.14e-03	7.55e-02	0.0755
N1.HOG0000005	Lodge	PS_chr11_G045438	Scots	PS_chr11_G045438	1.36e-60	3.37e-60	3.37e-60
N1.HOG0000005	Lodge	PS_chr10_G041862	Scots	PS_chr07_G029164	2.07e-57	4.30e-60	2.07e-57
N1.HOG0000005	Lodge	PS_chr02_G009063	Scots	PS_chr02_G009063	6.67e-90	7.03e-57	7.03e-57
N1.HOG0000005	Lodge	PS_chr10_G041862	Scots	PS_chr10_G041862	5.71e-60	6.65e-53	6.65e-53
N1.HOG0000005	Lodge	PS_sUP0013_G053195	Scots	PS_chr07_G029164	2.66e-53	1.59e-52	1.59e-52
N1.HOG0000005	Lodge	PS_chr10_G041862	Scots	PS_chr11_G045438	4.48e-56	9.58e-51	9.58e-51
N1.HOG0000005	Lodge	PS_sUP0013_G053195	Scots	PS_chr10_G041862	5.24e-57	3.07e-49	3.07e-49
N1.HOG0000005	Lodge	PS_chr02_G009063	Scots	PS_chr10_G041862	3.08e-83	5.06e-49	5.06e-49
N1.HOG0000005	Lodge	PS_chr10_G041862	Scots	PS_chr02_G009063	2.81e-59	7.92e-49	7.92e-49
N1.HOG0000005	Lodge	PS_chr11_G045438	Scots	PS_chr07_G029164	1.01e-48	1.13e-56	1.01e-48
N1.HOG0000005	Lodge	PS_chr02_G009063	Scots	PS_chr07_G029164	6.95e-61	2.87e-46	2.87e-46
N1.HOG0000005	Lodge	PS_sUP0013_G053195	Scots	PS_chr11_G045438	2.97e-51	1.13e-45	1.13e-45
N1.HOG0000005	Lodge	PS_sUP0013_G053195	Scots	PS_chr02_G009063	1.38e-55	5.59e-44	5.59e-44
N1.HOG0000005	Lodge	PS_chr11_G045438	Scots	PS_chr10_G041862	5.63e-44	5.53e-43	5.53e-43
N1.HOG0000005	Lodge	PS_chr02_G009063	Scots	PS_sUP0013_G053195	1.08e-79	6.20e-42	6.2e-42
N1.HOG0000005	Lodge	PS_chr02_G009063	Scots	PS_chr11_G045438	6.44e-65	6.49e-39	6.49e-39
N1.HOG0000005	Lodge	PS_chr07_G029164	Scots	PS_sUP0013_G053195	1.84e-62	3.67e-36	3.67e-36
N1.HOG0000005	Lodge	PS_chr11_G045438	Scots	PS_chr02_G009063	8.21e-39	8.39e-36	8.39e-36
N1.HOG0000005	Lodge	PS_chr10_G041862	Scots	PS_chr01_G004178	1.19e-37	3.06e-32	3.06e-32
N1.HOG0000005	Lodge	PS_sUP0013_G053195	Scots	PS_sUP0013_G053195	1.89e-38	5.41e-29	5.41e-29
N1.HOG0000005	Lodge	PS_sUP0013_G053195	Scots	PS_chr01_G004178	1.19e-37	2.21e-27	2.21e-27
N1.HOG0000005	Lodge	PS_chr11_G045438	Scots	PS_chr01_G004178	8.86e-26	2.64e-25	2.64e-25
N1.HOG0000005	Lodge	PS_chr02_G005498	Scots	PS_chr02_G009063	8.32e-23	2.95e-28	8.32e-23
N1.HOG0000005	Lodge	PS_chr10_G041862	Scots	PS_chr09_G039329	4.74e-31	2.08e-22	2.08e-22
N1.HOG0000005	Lodge	PS_chr02_G005498	Scots	PS_chr07_G029164	3.45e-22	3.96e-40	3.45e-22
N1.HOG0000005	Lodge	PS_chr02_G005498	Scots	PS_chr10_G041862	3.81e-22	1.12e-35	3.81e-22
N1.HOG0000005	Lodge	PS_chr02_G005498	Scots	PS_chr09_G039329	5.05e-21	4.47e-23	5.05e-21
N1.HOG0000005	Lodge	PS_chr07_G029164	Scots	PS_chr02_G009063	3.29e-25	1.56e-18	1.56e-18
N1.HOG0000005	Lodge	PS_chr01_G004178	Scots	PS_chr11_G045438	4.82e-18	1.18e-26	4.82e-18
N1.HOG0000005	Lodge	PS_chr02_G005498	Scots	PS_chr01_G004178	2.75e-17	1.07e-19	2.75e-17
N1.HOG0000005	Lodge	PS_chr02_G005498	Scots	PS_chr11_G045438	5.45e-17	2.04e-26	5.45e-17
N1.HOG0000005	Lodge	PS_sUP0013_G053195	Scots	PS_chr09_G039329	8.19e-25	2.36e-16	2.36e-16
N1.HOG0000005	Lodge	PS_sUP2195_G057727	Scots	PS_chr07_G029164	8.02e-16	4.62e-16	8.02e-16
N1.HOG0000005	Lodge	PS_sUP2195_G057727	Scots	PS_chr10_G041862	3.51e-23	1.56e-15	1.56e-15
N1.HOG0000005	Lodge	PS_chr10_G041862	Scots	PS_sUP0013_G053195	2.25e-29	2.40e-15	2.4e-15
N1.HOG0000005	Lodge	PS_chr02_G009063	Scots	PS_chr01_G004178	5.19e-19	8.20e-15	8.2e-15
N1.HOG0000005	Lodge	PS_sUP2195_G057727	Scots	PS_chr02_G009063	6.41e-20	8.49e-15	8.49e-15
N1.HOG0000005	Lodge	PS_chr02_G009063	Scots	PS_sUP2195_G057727	1.19e-35	9.29e-15	9.29e-15
N1.HOG0000005	Lodge	PS_sUP2195_G057727	Scots	PS_chr11_G045438	5.52e-19	1.75e-14	1.75e-14
N1.HOG0000005	Lodge	PS_chr11_G045438	Scots	PS_chr09_G039329	1.11e-16	3.84e-14	3.84e-14
N1.HOG0000005	Lodge	PS_chr11_G045438	Scots	PS_sUP0013_G053195	4.77e-24	9.43e-14	9.43e-14
N1.HOG0000005	Lodge	PS_chr02_G009063	Scots	PS_chr09_G039329	9.47e-19	9.70e-14	9.7e-14
N1.HOG0000005	Lodge	PS_chr01_G004178	Scots	PS_chr07_G029164	1.59e-12	1.76e-23	1.59e-12
N1.HOG0000005	Lodge	PS_sUP0013_G053195	Scots	PS_sUP2195_G057727	4.87e-12	9.05e-19	4.87e-12
N1.HOG0000005	Lodge	PS_sUP2195_G057727	Scots	PS_sUP0013_G053195	1.54e-25	6.04e-12	6.04e-12
N1.HOG0000005	Lodge	PS_chr06_G025436	Scots	PS_chr02_G009063	1.47e-12	8.92e-12	8.92e-12
N1.HOG0000005	Lodge	PS_chr07_G029164	Scots	PS_chr10_G041862	1.17e-15	1.02e-11	1.02e-11
N1.HOG0000005	Lodge	PS_chr06_G025436	Scots	PS_chr07_G029164	2.24e-11	1.51e-11	2.24e-11
N1.HOG0000005	Lodge	PS_chr01_G004178	Scots	PS_chr10_G041862	2.05e-10	1.29e-20	2.05e-10
N1.HOG0000005	Lodge	PS_chr06_G025436	Scots	PS_chr11_G045438	4.98e-10	7.72e-10	7.72e-10
N1.HOG0000005	Lodge	PS_chr02_G005498	Scots	PS_sUP0013_G053195	3.96e-15	9.93e-10	9.93e-10
N1.HOG0000005	Lodge	PS_sUP2195_G057727	Scots	PS_sUP2195_G057727	4.45e-31	1.08e-09	1.08e-09
N1.HOG0000005	Lodge	PS_chr09_G039329	Scots	PS_chr01_G004178	1.11e-09	1.03e-10	1.11e-09
N1.HOG0000005	Lodge	PS_chr06_G025436	Scots	PS_chr10_G041862	1.38e-11	4.69e-09	4.69e-09
N1.HOG0000005	Lodge	PS_chr01_G004178	Scots	PS_chr09_G039329	5.19e-08	1.65e-12	5.19e-08
N1.HOG0000005	Lodge	PS_chr09_G039329	Scots	PS_chr11_G045438	1.02e-07	1.58e-13	1.02e-07
N1.HOG0000005	Lodge	PS_chr06_G025436	Scots	PS_sUP0013_G053195	4.70e-11	2.58e-07	2.58e-07
N1.HOG0000005	Lodge	PS_sUP2195_G057727	Scots	PS_chr01_G004178	3.12e-10	5.48e-07	5.48e-07
N1.HOG0000005	Lodge	PS_chr06_G025436	Scots	PS_chr09_G039329	1.15e-06	2.66e-07	1.15e-06
N1.HOG0000005	Lodge	PS_chr06_G025436	Scots	PS_chr01_G004178	1.21e-06	1.08e-06	1.21e-06
N1.HOG0000005	Lodge	PS_chr09_G039329	Scots	PS_chr07_G029164	1.73e-06	3.33e-15	1.73e-06
N1.HOG0000005	Lodge	PS_chr01_G004178	Scots	PS_chr02_G009063	2.32e-06	1.08e-09	2.32e-06
N1.HOG0000005	Lodge	PS_chr09_G039329	Scots	PS_chr09_G039329	2.88e-06	9.88e-07	2.88e-06
N1.HOG0000005	Lodge	PS_sUP2195_G057727	Scots	PS_chr09_G039329	1.12e-05	1.37e-07	1.12e-05
N1.HOG0000005	Lodge	PS_chr07_G029164	Scots	PS_chr07_G029164	9.21e-05	6.88e-06	9.21e-05
N1.HOG0000005	Lodge	PS_chr09_G039329	Scots	PS_chr10_G041862	1.13e-04	1.04e-10	0.000113
N1.HOG0000005	Lodge	PS_chr09_G039329	Scots	PS_chr02_G009063	1.36e-04	4.78e-06	0.000136
N1.HOG0000005	Lodge	PS_chr01_G004178	Scots	PS_chr01_G004178	2.91e-04	2.73e-10	0.000291
N1.HOG0000005	Lodge	PS_chr10_G041862	Scots	PS_sUP2195_G057727	8.43e-04	1.01e-05	0.000843
N1.HOG0000005	Lodge	PS_chr01_G004178	Scots	PS_sUP0013_G053195	1.80e-03	3.19e-03	0.00319
N1.HOG0000005	Lodge	PS_chr11_G045438	Scots	PS_sUP2195_G057727	5.61e-03	9.49e-04	0.00561
N1.HOG0000005	Lodge	PS_sUP2195_G057727	Scots	PS_chr02_G005498	2.88e-05	8.99e-03	0.00899
N1.HOG0000005	Lodge	PS_chr07_G029164	Scots	PS_sUP2195_G057727	3.47e-18	1.16e-02	0.0116
N1.HOG0000005	Lodge	PS_chr01_G004178	Scots	PS_sUP2195_G057727	2.48e-02	1.80e-04	0.0248
N1.HOG0000005	Lodge	PS_chr09_G039329	Scots	PS_chr06_G025436	2.49e-05	6.11e-02	0.0611
N1.HOG0000005	Lodge	PS_chr02_G009063	Scots	PS_chr02_G005498	5.19e-05	6.16e-02	0.0616
N1.HOG0000005	Lodge	PS_chr07_G029164	Scots	PS_chr11_G045438	2.14e-02	6.45e-02	0.0645
N1.HOG0000005	Lodge	PS_chr02_G005498	Scots	PS_chr02_G005498	1.09e-03	8.14e-02	0.0814
N1.HOG0000005	Lodge	PS_chr07_G029164	Cher	FUN_014195-T1	4.57e-04	1.20e-02	0.012
N1.HOG0000005	Lodge	PS_chr06_G025436	Cher	FUN_014195-T1	1.86e-02	3.34e-03	0.0186
N1.HOG0000005	Lodge	PS_chr01_G004178	Cher	FUN_014195-T1	3.30e-02	1.98e-03	0.033
N1.HOG0000005	Nor	PA_chr02_G000547	Scots	PS_chr10_G041862	8.08e-32	3.09e-34	8.08e-32
N1.HOG0000005	Nor	PA_chr10_G001112	Scots	PS_chr10_G041862	1.92e-27	1.61e-26	1.61e-26
N1.HOG0000005	Nor	PA_chr02_G000547	Scots	PS_chr07_G029164	3.53e-26	2.49e-26	3.53e-26
N1.HOG0000005	Nor	PA_chr02_G000547	Scots	PS_chr02_G009063	1.29e-29	2.16e-25	2.16e-25
N1.HOG0000005	Nor	PA_chr11_sUL004_G000002	Scots	PS_chr11_G045438	1.78e-19	9.03e-20	1.78e-19
N1.HOG0000005	Nor	PA_chr10_G001112	Scots	PS_chr02_G009063	2.41e-28	2.66e-19	2.66e-19
N1.HOG0000005	Nor	PA_chr10_G001112	Scots	PS_chr07_G029164	1.58e-22	4.94e-19	4.94e-19
N1.HOG0000005	Nor	PA_chr01_G005795	Scots	PS_chr02_G009063	1.30e-18	2.00e-20	1.3e-18
N1.HOG0000005	Nor	PA_chr11_sUL004_G000002	Scots	PS_chr07_G029164	1.33e-18	4.56e-24	1.33e-18
N1.HOG0000005	Nor	PA_chr11_sUL004_G000002	Scots	PS_chr10_G041862	9.50e-18	2.96e-24	9.5e-18
N1.HOG0000005	Nor	PA_chr02_G000547	Scots	PS_chr11_G045438	1.51e-17	8.34e-17	8.34e-17
N1.HOG0000005	Nor	PA_chr01_G005795	Scots	PS_chr10_G041862	2.82e-16	1.67e-23	2.82e-16
N1.HOG0000005	Nor	PA_chr11_sUL004_G000002	Scots	PS_chr02_G009063	2.78e-15	2.68e-16	2.78e-15
N1.HOG0000005	Nor	PA_chr11_sUL004_G000002	Scots	PS_chr01_G004178	2.95e-15	6.59e-17	2.95e-15
N1.HOG0000005	Nor	PA_chr01_G005795	Scots	PS_chr11_G045438	7.26e-15	1.33e-17	7.26e-15
N1.HOG0000005	Nor	PA_chr01_G005795	Scots	PS_chr07_G029164	1.37e-14	4.93e-19	1.37e-14
N1.HOG0000005	Nor	PA_chr10_G001112	Scots	PS_chr11_G045438	1.51e-15	2.00e-13	2e-13
N1.HOG0000005	Nor	PA_chr02_G000547	Scots	PS_chr09_G039329	3.90e-20	3.08e-12	3.08e-12
N1.HOG0000005	Nor	PA_chr10_G001112	Scots	PS_sUP0013_G053195	9.42e-20	9.36e-12	9.36e-12
N1.HOG0000005	Nor	PA_chr02_G000547	Scots	PS_sUP0013_G053195	2.11e-16	2.08e-10	2.08e-10
N1.HOG0000005	Nor	PA_chr02_G000547	Scots	PS_chr01_G004178	2.32e-16	2.78e-10	2.78e-10
N1.HOG0000005	Nor	PA_chr01_G005795	Scots	PS_chr01_G004178	1.50e-13	4.13e-10	4.13e-10
N1.HOG0000005	Nor	PA_chr10_G001112	Scots	PS_chr09_G039329	1.99e-18	4.40e-10	4.4e-10
N1.HOG0000005	Nor	PA_chr01_G005795	Scots	PS_chr09_G039329	2.10e-13	9.00e-09	9e-09
N1.HOG0000005	Nor	PA_chr11_sUL004_G000002	Scots	PS_chr09_G039329	9.02e-12	1.03e-08	1.03e-08
N1.HOG0000005	Nor	PA_chr10_G001112	Scots	PS_chr01_G004178	5.18e-16	1.74e-08	1.74e-08
N1.HOG0000005	Nor	PA_chr11_sUL004_G000002	Scots	PS_sUP0013_G053195	1.18e-09	1.20e-07	1.2e-07
N1.HOG0000005	Nor	PA_chr01_G005795	Scots	PS_sUP0013_G053195	1.32e-06	2.02e-05	2.02e-05
N1.HOG0000005	Nor	PA_chr10_G001112	Scots	PS_sUP2195_G057727	7.78e-05	2.35e-05	7.78e-05
N1.HOG0000005	Nor	PA_chr01_G005795	Scots	PS_sUP2195_G057727	1.97e-04	2.04e-04	0.000204
N1.HOG0000005	Nor	PA_chr02_G000547	Scots	PS_chr06_G025436	5.32e-15	4.05e-04	0.000405
N1.HOG0000005	Nor	PA_chr07_G002307	Scots	PS_chr11_G045438	7.25e-04	1.73e-13	0.000725
N1.HOG0000005	Nor	PA_chr02_G000547	Scots	PS_sUP2195_G057727	2.05e-05	8.62e-04	0.000862
N1.HOG0000005	Nor	PA_chr07_G002307	Scots	PS_chr09_G039329	1.32e-03	6.71e-10	0.00132
N1.HOG0000005	Nor	PA_chr11_sUL004_G000002	Scots	PS_sUP2195_G057727	9.20e-03	7.67e-07	0.0092
N1.HOG0000005	Nor	PA_chr10_G001112	Scots	PS_chr06_G025436	3.82e-12	1.36e-02	0.0136
N1.HOG0000005	Nor	PA_chr02_G000547	Scots	PS_chr02_G005498	1.72e-13	5.29e-02	0.0529
N1.HOG0000005	Nor	PA_chr10_G001112	Scots	PS_chr02_G005498	2.58e-12	6.52e-02	0.0652
N1.HOG0000005	Nor	PA_chr07_G002307	Scots	PS_chr02_G009063	6.82e-02	3.30e-08	0.0682
N1.HOG0000005	Nor	PA_chr07_G002307	Scots	PS_chr01_G004178	7.79e-02	2.62e-05	0.0779
N1.HOG0000005	Nor	PA_chr02_G004631	Scots	PS_chr09_G039329	9.52e-02	1.16e-06	0.0952
N1.HOG0000005	Scots	PS_chr11_G045438	Cher	FUN_014195-T1	4.69e-04	4.00e-06	0.000469
N1.HOG0000005	Scots	PS_chr10_G041862	Cher	FUN_014195-T1	1.13e-02	2.83e-04	0.0113
N1.HOG0000005	Scots	PS_chr07_G029164	Cher	FUN_014195-T1	1.29e-02	6.61e-05	0.0129
N1.HOG0000005	Scots	PS_chr02_G009063	Cher	FUN_014195-T1	1.90e-02	6.83e-03	0.019
N1.HOG0000005	Scots	PS_sUP0013_G053195	Cher	FUN_014195-T1	1.94e-02	1.90e-02	0.0194
N1.HOG0000006	Birch	Bpev01.c0374.g0020.m0001	Cher	FUN_032241-T1	7.39e-02	3.18e-02	0.0739
N1.HOG0000008	Lodge	PS_chr09_G038002	Scots	PS_chr09_G038002	6.99e-54	7.88e-44	7.88e-44
N1.HOG0000010	Lodge	PS_chr01_G003790	Scots	PS_chr01_G003790	6.01e-23	4.12e-32	6.01e-23
N1.HOG0000010	Nor	PA_chr01_G005188	Scots	PS_chr01_G003790	3.55e-16	9.74e-18	3.55e-16
N1.HOG0000011	Lodge	PS_chr12_G049734	Nor	PA_chr01_G000098	3.08e-40	1.68e-42	3.08e-40
N1.HOG0000011	Lodge	PS_chr07_G032075	Nor	PA_chr01_G000098	2.21e-43	3.14e-35	3.14e-35
N1.HOG0000011	Lodge	PS_chr12_G049734	Nor	PA_chr03_G006776	9.58e-37	2.70e-33	2.7e-33
N1.HOG0000011	Lodge	PS_chr12_G050412	Nor	PA_chr01_G000098	5.83e-36	3.74e-33	3.74e-33
N1.HOG0000011	Lodge	PS_chr03_G011386	Nor	PA_chr01_G000098	3.03e-32	3.39e-31	3.39e-31
N1.HOG0000011	Lodge	PS_chr01_G003690	Nor	PA_chr01_G000098	7.09e-31	5.54e-33	7.09e-31
N1.HOG0000011	Lodge	PS_chr06_G026699	Nor	PA_chr01_G000098	7.49e-30	3.40e-33	7.49e-30
N1.HOG0000011	Lodge	PS_chr01_G000079	Nor	PA_chr01_G000098	1.49e-29	1.84e-35	1.49e-29
N1.HOG0000011	Lodge	PS_chr06_G026699	Nor	PA_chr03_G006776	5.43e-30	6.92e-29	6.92e-29
N1.HOG0000011	Lodge	PS_chr12_G049734	Nor	PA_chr08_G002263	1.67e-36	1.65e-27	1.65e-27
N1.HOG0000011	Lodge	PS_chr12_G050412	Nor	PA_chr03_G006776	1.53e-34	2.05e-26	2.05e-26
N1.HOG0000011	Lodge	PS_chr12_G049734	Nor	PA_chr09_G002954	5.55e-32	2.61e-26	2.61e-26
N1.HOG0000011	Lodge	PS_chr01_G003690	Nor	PA_chr03_G006776	1.37e-27	3.49e-25	3.49e-25
N1.HOG0000011	Lodge	PS_chr11_G048172	Nor	PA_chr01_G000098	7.21e-25	6.30e-36	7.21e-25
N1.HOG0000011	Lodge	PS_chr07_G029768	Nor	PA_chr03_G006776	7.36e-24	1.00e-39	7.36e-24
N1.HOG0000011	Lodge	PS_chr01_G000079	Nor	PA_chr03_G006776	1.88e-24	7.41e-24	7.41e-24
N1.HOG0000011	Lodge	PS_chr06_G026699	Nor	PA_chr02_G004933	1.95e-34	1.06e-23	1.06e-23
N1.HOG0000011	Lodge	PS_chr07_G029768	Nor	PA_chr01_G000098	1.30e-23	5.56e-38	1.3e-23
N1.HOG0000011	Lodge	PS_chr09_G039561	Nor	PA_chr01_G000098	6.31e-23	7.06e-33	6.31e-23
N1.HOG0000011	Lodge	PS_chr08_G033076	Nor	PA_chr01_G000098	7.29e-23	4.11e-28	7.29e-23
N1.HOG0000011	Lodge	PS_chr08_G033076	Nor	PA_chr07_G006119	1.14e-24	8.27e-23	8.27e-23
N1.HOG0000011	Lodge	PS_chr03_G011386	Nor	PA_chr03_G006776	8.66e-23	1.00e-23	8.66e-23
N1.HOG0000011	Lodge	PS_chr05_G021049	Nor	PA_chr01_G000098	2.37e-22	2.82e-36	2.37e-22
N1.HOG0000011	Lodge	PS_chr07_G032075	Nor	PA_chr02_G004933	5.17e-38	4.23e-22	4.23e-22
N1.HOG0000011	Lodge	PS_chr04_G015736	Nor	PA_chr01_G000098	7.18e-22	1.12e-31	7.18e-22
N1.HOG0000011	Lodge	PS_chr01_G000079	Nor	PA_chr02_G004933	1.11e-32	8.68e-22	8.68e-22
N1.HOG0000011	Lodge	PS_chr11_G048172	Nor	PA_chr03_G006776	1.02e-21	2.85e-31	1.02e-21
N1.HOG0000011	Lodge	PS_chr01_G000079	Nor	PA_chr09_G002954	1.12e-27	1.55e-21	1.55e-21
N1.HOG0000011	Lodge	PS_chr12_G049734	Nor	PA_chr02_G004933	1.22e-28	2.27e-21	2.27e-21
N1.HOG0000011	Lodge	PS_chr08_G033076	Nor	PA_chr03_G006776	2.39e-21	7.43e-31	2.39e-21
N1.HOG0000011	Lodge	PS_chr12_G049734	Nor	PA_chr09_G001758	4.25e-35	4.37e-21	4.37e-21
N1.HOG0000011	Lodge	PS_chr06_G026699	Nor	PA_chr09_G002954	3.37e-28	5.73e-21	5.73e-21
N1.HOG0000011	Lodge	PS_chr10_G041316	Nor	PA_chr02_G004933	3.82e-21	7.44e-21	7.44e-21
N1.HOG0000011	Lodge	PS_chr03_G011386	Nor	PA_chr02_G004933	2.63e-30	8.57e-21	8.57e-21
N1.HOG0000011	Lodge	PS_chr06_G026699	Nor	PA_chr08_G002263	1.61e-31	8.75e-21	8.75e-21
N1.HOG0000011	Lodge	PS_chr07_G032075	Nor	PA_chr08_G002263	1.46e-34	1.33e-19	1.33e-19
N1.HOG0000011	Lodge	PS_chr07_G032075	Nor	PA_chr03_G006776	5.00e-28	1.58e-19	1.58e-19
N1.HOG0000011	Lodge	PS_chr01_G000079	Nor	PA_chr08_G002263	1.78e-26	1.72e-19	1.72e-19
N1.HOG0000011	Lodge	PS_chr07_G029768	Nor	PA_chr11_G000134	3.37e-19	3.18e-19	3.37e-19
N1.HOG0000011	Lodge	PS_chr09_G039561	Nor	PA_chr08_G002263	3.41e-19	1.79e-26	3.41e-19
N1.HOG0000011	Lodge	PS_chr04_G015736	Nor	PA_chr08_G002263	3.68e-19	1.48e-25	3.68e-19
N1.HOG0000011	Lodge	PS_chr11_G044997	Nor	PA_chr03_G006776	3.96e-19	1.44e-28	3.96e-19
N1.HOG0000011	Lodge	PS_chr07_G029768	Nor	PA_chr11_G003237	4.91e-19	2.70e-21	4.91e-19
N1.HOG0000011	Lodge	PS_chr11_G044997	Nor	PA_chr01_G000098	5.18e-19	2.23e-29	5.18e-19
N1.HOG0000011	Lodge	PS_chr01_G003690	Nor	PA_chr08_G002263	1.36e-26	5.87e-19	5.87e-19
N1.HOG0000011	Lodge	PS_chr09_G038022	Nor	PA_chr03_G006776	8.62e-19	1.71e-30	8.62e-19
N1.HOG0000011	Lodge	PS_chr12_G050412	Nor	PA_chr02_G004933	3.07e-34	1.13e-18	1.13e-18
N1.HOG0000011	Lodge	PS_chr12_G050412	Nor	PA_chr08_G002263	2.21e-31	1.22e-18	1.22e-18
N1.HOG0000011	Lodge	PS_chr12_G049734	Nor	PA_chr11_G003237	3.24e-24	1.28e-18	1.28e-18
N1.HOG0000011	Lodge	PS_chr06_G026699	Nor	PA_chr07_G003099	1.43e-23	1.99e-18	1.99e-18
N1.HOG0000011	Lodge	PS_chr12_G049734	Nor	PA_chr12_G001527	9.78e-32	2.96e-18	2.96e-18
N1.HOG0000011	Lodge	PS_chr07_G029768	Nor	PA_chr02_G004933	3.32e-18	1.26e-20	3.32e-18
N1.HOG0000011	Lodge	PS_chr12_G049734	Nor	PA_chr07_G003099	4.65e-26	6.01e-18	6.01e-18
N1.HOG0000011	Lodge	PS_chr10_G041316	Nor	PA_chr08_G002263	6.42e-18	2.50e-20	6.42e-18
N1.HOG0000011	Lodge	PS_chr09_G039561	Nor	PA_chr03_G006776	7.11e-18	1.27e-31	7.11e-18
N1.HOG0000011	Lodge	PS_chr05_G021049	Nor	PA_chr09_G002954	7.37e-18	1.28e-26	7.37e-18
N1.HOG0000011	Lodge	PS_chr10_G041316	Nor	PA_chr01_G000098	8.26e-18	3.61e-27	8.26e-18
N1.HOG0000011	Lodge	PS_chr12_G050412	Nor	PA_chr07_G003099	1.87e-25	8.97e-18	8.97e-18
N1.HOG0000011	Lodge	PS_chr07_G029768	Nor	PA_chr09_G002954	1.15e-17	2.98e-22	1.15e-17
N1.HOG0000011	Lodge	PS_chr05_G021049	Nor	PA_chr08_G002263	1.25e-17	4.42e-25	1.25e-17
N1.HOG0000011	Lodge	PS_chr08_G033076	Nor	PA_chr08_G002263	1.45e-17	1.88e-19	1.45e-17
N1.HOG0000011	Lodge	PS_chr07_G029768	Nor	PA_chr11_G000126	4.46e-18	1.47e-17	1.47e-17
N1.HOG0000011	Lodge	PS_chr11_G048172	Nor	PA_chr08_G002263	1.92e-17	2.24e-21	1.92e-17
N1.HOG0000011	Lodge	PS_chr08_G033076	Nor	PA_chr02_G004933	4.34e-18	2.14e-17	2.14e-17
N1.HOG0000011	Lodge	PS_chr11_G048172	Nor	PA_chr03_G001865	2.23e-18	2.95e-17	2.95e-17
N1.HOG0000011	Lodge	PS_chr07_G029768	Nor	PA_chr03_G001865	2.38e-18	3.96e-17	3.96e-17
N1.HOG0000011	Lodge	PS_chr05_G020892	Nor	PA_chr01_G000098	4.43e-17	1.03e-37	4.43e-17
N1.HOG0000011	Lodge	PS_chr07_G029768	Nor	PA_chr09_G001758	7.31e-20	4.53e-17	4.53e-17
N1.HOG0000011	Lodge	PS_chr11_G048172	Nor	PA_chr09_G002954	6.01e-17	9.88e-23	6.01e-17
N1.HOG0000011	Lodge	PS_chr12_G050412	Nor	PA_chr09_G002954	1.29e-28	7.20e-17	7.2e-17
N1.HOG0000011	Lodge	PS_chr12_G049734	Nor	PA_chr05_G002742	1.75e-23	7.70e-17	7.7e-17
N1.HOG0000011	Lodge	PS_chr03_G011386	Nor	PA_chr08_G002263	1.09e-22	7.89e-17	7.89e-17
N1.HOG0000011	Lodge	PS_chr01_G000079	Nor	PA_chr11_G000134	4.33e-30	9.95e-17	9.95e-17
N1.HOG0000011	Lodge	PS_chr04_G015736	Nor	PA_chr07_G006119	9.96e-17	8.22e-18	9.96e-17
N1.HOG0000011	Lodge	PS_chr11_G048172	Nor	PA_chr11_G003237	1.00e-16	7.32e-19	1e-16
N1.HOG0000011	Lodge	PS_chr05_G021049	Nor	PA_chr03_G006776	1.10e-16	1.62e-31	1.1e-16
N1.HOG0000011	Lodge	PS_chr09_G038022	Nor	PA_chr11_G003237	1.12e-16	5.43e-19	1.12e-16
N1.HOG0000011	Lodge	PS_chr04_G015736	Nor	PA_chr09_G001758	1.74e-19	3.75e-16	3.75e-16
N1.HOG0000011	Lodge	PS_chr09_G038022	Nor	PA_chr01_G000098	3.95e-16	5.55e-23	3.95e-16
N1.HOG0000011	Lodge	PS_chr01_G000084	Nor	PA_chr08_G002263	4.69e-16	2.79e-17	4.69e-16
N1.HOG0000011	Lodge	PS_chr07_G029768	Nor	PA_chr10_G000455	4.98e-16	4.08e-18	4.98e-16
N1.HOG0000011	Lodge	PS_chr12_G049734	Nor	PA_chr10_G000455	4.42e-26	5.20e-16	5.2e-16
N1.HOG0000011	Lodge	PS_chr01_G003690	Nor	PA_chr02_G004933	1.44e-24	5.31e-16	5.31e-16
N1.HOG0000011	Lodge	PS_chr07_G032075	Nor	PA_chr09_G002954	3.37e-28	5.44e-16	5.44e-16
N1.HOG0000011	Lodge	PS_chr09_G039561	Nor	PA_chr09_G001758	1.20e-20	5.69e-16	5.69e-16
N1.HOG0000011	Lodge	PS_chr01_G000079	Nor	PA_chr07_G003099	1.04e-25	6.77e-16	6.77e-16
N1.HOG0000011	Lodge	PS_chr05_G020892	Nor	PA_chr11_G003237	7.79e-16	3.35e-22	7.79e-16
N1.HOG0000011	Lodge	PS_chr07_G029768	Nor	PA_chr05_G002742	8.91e-16	2.38e-17	8.91e-16
N1.HOG0000011	Lodge	PS_chr10_G041316	Nor	PA_chr11_G003237	9.28e-16	1.60e-16	9.28e-16
N1.HOG0000011	Lodge	PS_chr09_G038022	Nor	PA_chr08_G002263	1.42e-15	5.62e-18	1.42e-15
N1.HOG0000011	Lodge	PS_chr01_G003690	Nor	PA_chr09_G002954	2.78e-20	1.45e-15	1.45e-15
N1.HOG0000011	Lodge	PS_chr01_G000079	Nor	PA_chr10_G000455	4.70e-26	1.90e-15	1.9e-15
N1.HOG0000011	Lodge	PS_chr12_G050412	Nor	PA_chr11_G000134	1.83e-32	2.97e-15	2.97e-15
N1.HOG0000011	Lodge	PS_chr12_G049734	Nor	PA_chr03_G001865	6.51e-30	4.05e-15	4.05e-15
N1.HOG0000011	Lodge	PS_chr07_G032075	Nor	PA_chr11_G000134	5.53e-36	4.45e-15	4.45e-15
N1.HOG0000011	Lodge	PS_chr12_G049734	Nor	PA_chr07_G006119	1.24e-22	4.59e-15	4.59e-15
N1.HOG0000011	Lodge	PS_chr07_G032075	Nor	PA_chr04_G001601	3.17e-34	4.98e-15	4.98e-15
N1.HOG0000011	Lodge	PS_chr05_G021049	Nor	PA_chr10_G000455	5.51e-15	7.47e-18	5.51e-15
N1.HOG0000011	Lodge	PS_chr01_G000084	Nor	PA_chr03_G006776	5.73e-15	1.31e-26	5.73e-15
N1.HOG0000011	Lodge	PS_chr04_G015736	Nor	PA_chr03_G006776	6.18e-15	1.11e-27	6.18e-15
N1.HOG0000011	Lodge	PS_chr06_G026699	Nor	PA_chr11_G000134	3.67e-31	6.93e-15	6.93e-15
N1.HOG0000011	Lodge	PS_chr10_G041316	Nor	PA_chr03_G006776	8.96e-15	3.76e-24	8.96e-15
N1.HOG0000011	Lodge	PS_chr05_G020892	Nor	PA_chr03_G006776	1.04e-14	7.74e-38	1.04e-14
N1.HOG0000011	Lodge	PS_chr01_G003690	Nor	PA_chr09_G001758	1.02e-21	1.18e-14	1.18e-14
N1.HOG0000011	Lodge	PS_chr06_G026699	Nor	PA_chr10_G000455	7.64e-26	1.22e-14	1.22e-14
N1.HOG0000011	Lodge	PS_chr11_G044997	Nor	PA_chr09_G002954	1.28e-14	7.89e-20	1.28e-14
N1.HOG0000011	Lodge	PS_chr07_G032075	Nor	PA_chr07_G003099	4.03e-29	1.45e-14	1.45e-14
N1.HOG0000011	Lodge	PS_chr04_G015736	Nor	PA_chr11_G000134	1.56e-14	1.86e-15	1.56e-14
N1.HOG0000011	Lodge	PS_chr01_G000079	Nor	PA_chr03_G001865	3.60e-28	1.72e-14	1.72e-14
N1.HOG0000011	Lodge	PS_chr12_G049734	Nor	PA_chr11_G000134	5.70e-29	1.75e-14	1.75e-14
N1.HOG0000011	Lodge	PS_chr07_G029768	Nor	PA_chr08_G002263	1.90e-14	2.18e-20	1.9e-14
N1.HOG0000011	Lodge	PS_chr03_G011386	Nor	PA_chr05_G002742	2.82e-19	2.13e-14	2.13e-14
N1.HOG0000011	Lodge	PS_chr11_G048172	Nor	PA_chr05_G002742	2.17e-14	8.06e-15	2.17e-14
N1.HOG0000011	Lodge	PS_chr06_G026699	Nor	PA_chr11_G003237	2.62e-19	2.26e-14	2.26e-14
N1.HOG0000011	Lodge	PS_chr10_G041316	Nor	PA_chr03_G001865	1.81e-18	2.32e-14	2.32e-14
N1.HOG0000011	Lodge	PS_chr11_G048172	Nor	PA_chr02_G004933	3.11e-14	9.09e-16	3.11e-14
N1.HOG0000011	Lodge	PS_chr05_G020892	Nor	PA_chr03_G001865	3.75e-14	5.28e-21	3.75e-14
N1.HOG0000011	Lodge	PS_chr06_G026699	Nor	PA_chr03_G001865	8.23e-23	3.90e-14	3.9e-14
N1.HOG0000011	Lodge	PS_chr11_G048172	Nor	PA_chr10_G000455	4.01e-14	7.60e-17	4.01e-14
N1.HOG0000011	Lodge	PS_chr05_G021049	Nor	PA_chr03_G001865	4.75e-14	5.01e-15	4.75e-14
N1.HOG0000011	Lodge	PS_chr10_G041316	Nor	PA_chr09_G002954	4.79e-14	6.72e-20	4.79e-14
N1.HOG0000011	Lodge	PS_chr05_G021092	Nor	PA_chr01_G000098	4.81e-14	6.20e-27	4.81e-14
N1.HOG0000011	Lodge	PS_chr03_G011386	Nor	PA_chr11_G003237	4.00e-17	5.18e-14	5.18e-14
N1.HOG0000011	Lodge	PS_chr09_G038022	Nor	PA_chr10_G000455	5.94e-14	8.82e-17	5.94e-14
N1.HOG0000011	Lodge	PS_chr11_G044997	Nor	PA_chr09_G001758	7.85e-14	7.75e-14	7.85e-14
N1.HOG0000011	Lodge	PS_chr12_G050412	Nor	PA_chr09_G001758	2.01e-23	7.86e-14	7.86e-14
N1.HOG0000011	Lodge	PS_chr09_G038022	Nor	PA_chr05_G002742	1.04e-14	8.25e-14	8.25e-14
N1.HOG0000011	Lodge	PS_chr03_G011386	Nor	PA_chr03_G001865	7.61e-22	8.52e-14	8.52e-14
N1.HOG0000011	Lodge	PS_chr07_G029768	Nor	PA_chr12_G001527	2.10e-15	9.79e-14	9.79e-14
N1.HOG0000011	Lodge	PS_chr09_G039561	Nor	PA_chr11_G003237	1.13e-13	1.50e-17	1.13e-13
N1.HOG0000011	Lodge	PS_chr04_G015736	Nor	PA_chr03_G001865	4.25e-14	1.23e-13	1.23e-13
N1.HOG0000011	Lodge	PS_chr07_G029768	Nor	PA_chr07_G003099	1.47e-13	9.28e-14	1.47e-13
N1.HOG0000011	Lodge	PS_chr01_G000079	Nor	PA_chr04_G001601	6.47e-32	2.06e-13	2.06e-13
N1.HOG0000011	Lodge	PS_chr05_G020892	Nor	PA_chr07_G006119	2.10e-13	1.48e-17	2.1e-13
N1.HOG0000011	Lodge	PS_chr12_G050412	Nor	PA_chr04_G001601	4.15e-30	2.11e-13	2.11e-13
N1.HOG0000011	Lodge	PS_chr04_G015736	Nor	PA_chr02_G004933	2.19e-13	3.70e-14	2.19e-13
N1.HOG0000011	Lodge	PS_chr11_G044997	Nor	PA_chr07_G003099	2.22e-13	3.75e-14	2.22e-13
N1.HOG0000011	Lodge	PS_chr09_G039561	Nor	PA_chr02_G004933	2.34e-13	5.26e-16	2.34e-13
N1.HOG0000011	Lodge	PS_chr01_G000079	Nor	PA_chr07_G006119	3.39e-16	2.45e-13	2.45e-13
N1.HOG0000011	Lodge	PS_chr10_G041316	Nor	PA_chr07_G003099	1.22e-15	2.59e-13	2.59e-13
N1.HOG0000011	Lodge	PS_chr06_G026699	Nor	PA_chr09_G001758	2.14e-21	2.59e-13	2.59e-13
N1.HOG0000011	Lodge	PS_chr01_G003690	Nor	PA_chr04_G001601	1.93e-30	2.67e-13	2.67e-13
N1.HOG0000011	Lodge	PS_chr09_G038022	Nor	PA_chr07_G006119	3.27e-13	8.65e-15	3.27e-13
N1.HOG0000011	Lodge	PS_chr10_G041316	Nor	PA_chr10_G000455	3.39e-13	4.47e-16	3.39e-13
N1.HOG0000011	Lodge	PS_chr11_G044997	Nor	PA_chr02_G004933	4.89e-13	5.45e-16	4.89e-13
N1.HOG0000011	Lodge	PS_chr05_G021049	Nor	PA_chr09_G001758	1.46e-16	5.47e-13	5.47e-13
N1.HOG0000011	Lodge	PS_chr11_G044997	Nor	PA_chr10_G000455	5.65e-13	1.18e-16	5.65e-13
N1.HOG0000011	Lodge	PS_chr04_G015736	Nor	PA_chr12_G001527	5.67e-13	1.54e-13	5.67e-13
N1.HOG0000011	Lodge	PS_chr05_G020892	Nor	PA_chr08_G002263	5.73e-13	8.48e-24	5.73e-13
N1.HOG0000011	Lodge	PS_chr01_G000084	Nor	PA_chr09_G002954	7.00e-13	2.21e-16	7e-13
N1.HOG0000011	Lodge	PS_chr01_G000079	Nor	PA_chr11_G003237	8.71e-14	7.33e-13	7.33e-13
N1.HOG0000011	Lodge	PS_chr12_G050412	Nor	PA_chr03_G001865	2.11e-26	8.16e-13	8.16e-13
N1.HOG0000011	Lodge	PS_chr06_G026699	Nor	PA_chr05_G002742	1.43e-17	8.18e-13	8.18e-13
N1.HOG0000011	Lodge	PS_chr03_G011386	Nor	PA_chr09_G002954	2.67e-16	9.01e-13	9.01e-13
N1.HOG0000011	Lodge	PS_chr09_G039561	Nor	PA_chr09_G002954	9.13e-13	1.68e-22	9.13e-13
N1.HOG0000011	Lodge	PS_chr09_G038022	Nor	PA_chr11_G000126	9.36e-13	8.77e-13	9.36e-13
N1.HOG0000011	Lodge	PS_chr04_G015736	Nor	PA_chr09_G002954	9.65e-13	7.18e-22	9.65e-13
N1.HOG0000011	Lodge	PS_chr05_G021092	Nor	PA_chr03_G001865	9.75e-13	1.04e-14	9.75e-13
N1.HOG0000011	Lodge	PS_chr09_G038022	Nor	PA_chr03_G001865	8.01e-16	1.13e-12	1.13e-12
N1.HOG0000011	Lodge	PS_chr03_G011386	Nor	PA_chr07_G003099	1.22e-21	1.30e-12	1.3e-12
N1.HOG0000011	Lodge	PS_chr07_G032075	Nor	PA_chr09_G001758	2.91e-26	1.57e-12	1.57e-12
N1.HOG0000011	Lodge	PS_chr07_G029768	Nor	PA_chr07_G006119	1.60e-12	7.98e-15	1.6e-12
N1.HOG0000011	Lodge	PS_chr05_G021049	Nor	PA_chr02_G004933	1.71e-12	1.86e-15	1.71e-12
N1.HOG0000011	Lodge	PS_chr11_G044997	Nor	PA_chr08_G002263	1.94e-12	1.49e-14	1.94e-12
N1.HOG0000011	Lodge	PS_chr03_G011386	Nor	PA_chr09_G001758	1.61e-19	2.03e-12	2.03e-12
N1.HOG0000011	Lodge	PS_chr05_G020892	Nor	PA_chr05_G002742	2.39e-12	4.81e-18	2.39e-12
N1.HOG0000011	Lodge	PS_chr08_G033076	Nor	PA_chr05_G002742	2.75e-13	2.48e-12	2.48e-12
N1.HOG0000011	Lodge	PS_chr08_G033076	Nor	PA_chr11_G000126	2.41e-15	2.50e-12	2.5e-12
N1.HOG0000011	Lodge	PS_chr03_G011386	Nor	PA_chr11_G000134	1.29e-21	2.56e-12	2.56e-12
N1.HOG0000011	Lodge	PS_chr09_G039561	Nor	PA_chr05_G002742	2.60e-12	1.15e-14	2.6e-12
N1.HOG0000011	Lodge	PS_chr05_G021049	Nor	PA_chr05_G002742	3.33e-12	1.56e-15	3.33e-12
N1.HOG0000011	Lodge	PS_chr09_G039561	Nor	PA_chr07_G006119	3.65e-12	2.85e-15	3.65e-12
N1.HOG0000011	Lodge	PS_chr04_G015736	Nor	PA_chr04_G001601	6.32e-15	3.71e-12	3.71e-12
N1.HOG0000011	Lodge	PS_chr03_G011386	Nor	PA_chr04_G001601	4.09e-26	3.87e-12	3.87e-12
N1.HOG0000011	Lodge	PS_chr11_G044997	Nor	PA_chr11_G000134	4.06e-12	8.58e-14	4.06e-12
N1.HOG0000011	Lodge	PS_chr05_G020892	Nor	PA_chr09_G001758	4.46e-12	7.43e-16	4.46e-12
N1.HOG0000011	Lodge	PS_chr10_G041316	Nor	PA_chr12_G001527	4.93e-15	4.94e-12	4.94e-12
N1.HOG0000011	Lodge	PS_chr12_G049734	Nor	PA_chr11_G000126	1.75e-20	5.22e-12	5.22e-12
N1.HOG0000011	Lodge	PS_chr08_G033076	Nor	PA_chr11_G003237	5.51e-12	2.61e-12	5.51e-12
N1.HOG0000011	Lodge	PS_chr05_G021049	Nor	PA_chr11_G000134	5.68e-12	8.98e-13	5.68e-12
N1.HOG0000011	Lodge	PS_chr04_G015736	Nor	PA_chr05_G002742	5.79e-12	2.38e-15	5.79e-12
N1.HOG0000011	Lodge	PS_chr01_G000079	Nor	PA_chr05_G002742	4.79e-18	7.41e-12	7.41e-12
N1.HOG0000011	Lodge	PS_chr01_G000084	Nor	PA_chr01_G000098	7.55e-12	8.48e-20	7.55e-12
N1.HOG0000011	Lodge	PS_chr12_G050412	Nor	PA_chr05_G002742	2.10e-16	7.73e-12	7.73e-12
N1.HOG0000011	Lodge	PS_chr10_G041316	Nor	PA_chr07_G006119	2.02e-12	9.04e-12	9.04e-12
N1.HOG0000011	Lodge	PS_chr11_G048172	Nor	PA_chr12_G001527	8.18e-15	1.01e-11	1.01e-11
N1.HOG0000011	Lodge	PS_chr09_G039561	Nor	PA_chr12_G001527	1.03e-11	9.87e-12	1.03e-11
N1.HOG0000011	Lodge	PS_chr08_G033076	Nor	PA_chr11_G000134	2.33e-14	1.06e-11	1.06e-11
N1.HOG0000011	Lodge	PS_chr11_G044997	Nor	PA_chr11_G003237	1.26e-11	5.02e-14	1.26e-11
N1.HOG0000011	Lodge	PS_chr07_G032075	Nor	PA_chr03_G001865	1.13e-29	1.40e-11	1.4e-11
N1.HOG0000011	Lodge	PS_chr06_G026699	Nor	PA_chr07_G006119	6.98e-18	1.44e-11	1.44e-11
N1.HOG0000011	Lodge	PS_chr05_G021049	Nor	PA_chr07_G006119	1.56e-11	6.99e-13	1.56e-11
N1.HOG0000011	Lodge	PS_chr01_G000084	Nor	PA_chr02_G004933	1.61e-11	1.38e-13	1.61e-11
N1.HOG0000011	Lodge	PS_chr11_G044997	Nor	PA_chr05_G002742	1.67e-11	5.66e-16	1.67e-11
N1.HOG0000011	Lodge	PS_chr11_G048172	Nor	PA_chr07_G003099	1.86e-11	2.14e-12	1.86e-11
N1.HOG0000011	Lodge	PS_chr08_G033076	Nor	PA_chr09_G002954	1.88e-11	4.47e-16	1.88e-11
N1.HOG0000011	Lodge	PS_chr08_G033076	Nor	PA_chr12_G001527	1.63e-13	1.90e-11	1.9e-11
N1.HOG0000011	Lodge	PS_chr12_G050412	Nor	PA_chr07_G006119	4.86e-18	2.20e-11	2.2e-11
N1.HOG0000011	Lodge	PS_chr04_G015736	Nor	PA_chr11_G003237	2.97e-11	3.89e-14	2.97e-11
N1.HOG0000011	Lodge	PS_chr07_G032075	Nor	PA_chr07_G006119	1.67e-16	3.11e-11	3.11e-11
N1.HOG0000011	Lodge	PS_chr05_G021049	Nor	PA_chr11_G003237	3.14e-11	1.13e-16	3.14e-11
N1.HOG0000011	Lodge	PS_chr09_G038022	Nor	PA_chr09_G002954	3.17e-11	3.86e-17	3.17e-11
N1.HOG0000011	Lodge	PS_chr05_G020892	Nor	PA_chr02_G004933	3.19e-11	1.13e-16	3.19e-11
N1.HOG0000011	Lodge	PS_chr05_G021049	Nor	PA_chr07_G003099	3.20e-11	1.96e-11	3.2e-11
N1.HOG0000011	Lodge	PS_chr11_G044997	Nor	PA_chr03_G001865	3.49e-11	4.83e-15	3.49e-11
N1.HOG0000011	Lodge	PS_chr01_G000084	Nor	PA_chr03_G001865	4.21e-13	4.04e-11	4.04e-11
N1.HOG0000011	Lodge	PS_chr06_G026699	Nor	PA_chr04_G001601	3.67e-28	4.20e-11	4.2e-11
N1.HOG0000011	Lodge	PS_chr11_G045006	Nor	PA_chr01_G000098	4.60e-11	5.88e-18	4.6e-11
N1.HOG0000011	Lodge	PS_chr01_G003690	Nor	PA_chr11_G000134	3.89e-24	4.98e-11	4.98e-11
N1.HOG0000011	Lodge	PS_chr08_G033076	Nor	PA_chr09_G001758	5.16e-18	5.16e-11	5.16e-11
N1.HOG0000011	Lodge	PS_chr05_G021092	Nor	PA_chr02_G004933	5.27e-11	2.33e-17	5.27e-11
N1.HOG0000011	Lodge	PS_chr07_G032075	Nor	PA_chr11_G003237	1.01e-13	5.31e-11	5.31e-11
N1.HOG0000011	Lodge	PS_chr06_G026699	Nor	PA_chr05_G002529	6.84e-13	5.45e-11	5.45e-11
N1.HOG0000011	Lodge	PS_chr09_G039561	Nor	PA_chr03_G001865	1.63e-12	5.64e-11	5.64e-11
N1.HOG0000011	Lodge	PS_chr01_G003690	Nor	PA_chr07_G006119	3.70e-17	6.62e-11	6.62e-11
N1.HOG0000011	Lodge	PS_chr01_G000084	Nor	PA_chr12_G001527	7.88e-14	7.61e-11	7.61e-11
N1.HOG0000011	Lodge	PS_chr03_G011386	Nor	PA_chr10_G000455	3.44e-18	7.85e-11	7.85e-11
N1.HOG0000011	Lodge	PS_chr11_G045006	Nor	PA_chr08_G002263	8.48e-11	7.17e-17	8.48e-11
N1.HOG0000011	Lodge	PS_chr01_G003690	Nor	PA_chr03_G001865	4.24e-17	9.14e-11	9.14e-11
N1.HOG0000011	Lodge	PS_chr10_G041316	Nor	PA_chr05_G002742	5.38e-11	1.09e-10	1.09e-10
N1.HOG0000011	Lodge	PS_chr01_G003690	Nor	PA_chr11_G003237	5.54e-13	1.22e-10	1.22e-10
N1.HOG0000011	Lodge	PS_chr11_G045006	Nor	PA_chr07_G006119	1.22e-10	4.81e-14	1.22e-10
N1.HOG0000011	Lodge	PS_chr01_G000084	Nor	PA_chr05_G002742	1.37e-10	1.38e-13	1.37e-10
N1.HOG0000011	Lodge	PS_chr04_G015736	Nor	PA_chr10_G000455	1.88e-10	1.83e-15	1.88e-10
N1.HOG0000011	Lodge	PS_chr08_G033076	Nor	PA_chr10_G000455	2.24e-10	1.20e-11	2.24e-10
N1.HOG0000011	Lodge	PS_chr05_G021092	Nor	PA_chr08_G002263	2.47e-10	6.08e-17	2.47e-10
N1.HOG0000011	Lodge	PS_chr05_G021092	Nor	PA_chr05_G002742	2.49e-10	4.98e-13	2.49e-10
N1.HOG0000011	Lodge	PS_chr09_G038022	Nor	PA_chr12_G001527	3.51e-11	2.54e-10	2.54e-10
N1.HOG0000011	Lodge	PS_chr12_G050412	Nor	PA_chr11_G003237	4.93e-15	2.64e-10	2.64e-10
N1.HOG0000011	Lodge	PS_chr11_G048172	Nor	PA_chr11_G000134	2.60e-12	3.04e-10	3.04e-10
N1.HOG0000011	Lodge	PS_chr09_G039413	Nor	PA_chr03_G006776	3.16e-10	5.51e-27	3.16e-10
N1.HOG0000011	Lodge	PS_chr08_G033076	Nor	PA_chr03_G001865	4.26e-15	3.69e-10	3.69e-10
N1.HOG0000011	Lodge	PS_chr05_G020892	Nor	PA_chr12_G001527	3.71e-10	4.92e-14	3.71e-10
N1.HOG0000011	Lodge	PS_chr04_G015736	Nor	PA_chr11_G000126	7.33e-11	3.95e-10	3.95e-10
N1.HOG0000011	Lodge	PS_chr05_G021092	Nor	PA_chr10_G000455	4.00e-10	7.82e-18	4e-10
N1.HOG0000011	Lodge	PS_chr11_G048172	Nor	PA_chr07_G006119	4.12e-10	3.02e-11	4.12e-10
N1.HOG0000011	Lodge	PS_chr01_G003690	Nor	PA_chr07_G003099	7.23e-17	4.23e-10	4.23e-10
N1.HOG0000011	Lodge	PS_chr01_G000079	Nor	PA_chr05_G002529	6.33e-15	4.39e-10	4.39e-10
N1.HOG0000011	Lodge	PS_chr05_G021092	Nor	PA_chr07_G003099	4.51e-10	7.94e-13	4.51e-10
N1.HOG0000011	Lodge	PS_chr01_G000084	Nor	PA_chr07_G006119	1.67e-10	5.20e-10	5.2e-10
N1.HOG0000011	Lodge	PS_chr12_G050412	Nor	PA_chr10_G000455	2.07e-24	5.24e-10	5.24e-10
N1.HOG0000011	Lodge	PS_chr11_G048172	Nor	PA_chr09_G001758	4.93e-12	5.61e-10	5.61e-10
N1.HOG0000011	Lodge	PS_chr05_G020892	Nor	PA_chr09_G002954	6.22e-10	1.21e-20	6.22e-10
N1.HOG0000011	Lodge	PS_chr10_G041316	Nor	PA_chr11_G000134	2.52e-13	6.75e-10	6.75e-10
N1.HOG0000011	Lodge	PS_chr06_G025437	Nor	PA_chr11_G003237	6.94e-10	2.48e-20	6.94e-10
N1.HOG0000011	Lodge	PS_chr11_G045006	Nor	PA_chr03_G006776	7.21e-10	8.48e-19	7.21e-10
N1.HOG0000011	Lodge	PS_chr06_G025437	Nor	PA_chr08_G002263	8.26e-10	7.05e-18	8.26e-10
N1.HOG0000011	Lodge	PS_chr09_G039561	Nor	PA_chr11_G000126	9.25e-10	7.67e-10	9.25e-10
N1.HOG0000011	Lodge	PS_chr05_G020892	Nor	PA_chr11_G000126	1.12e-09	3.68e-13	1.12e-09
N1.HOG0000011	Lodge	PS_chr01_G000079	Nor	PA_chr09_G001758	2.28e-16	1.13e-09	1.13e-09
N1.HOG0000011	Lodge	PS_chr09_G039413	Nor	PA_chr03_G001865	1.16e-09	3.13e-12	1.16e-09
N1.HOG0000011	Lodge	PS_chr07_G032075	Nor	PA_chr05_G002742	2.54e-16	1.17e-09	1.17e-09
N1.HOG0000011	Lodge	PS_chr05_G020892	Nor	PA_chr10_G000455	1.35e-09	1.45e-17	1.35e-09
N1.HOG0000011	Lodge	PS_chr11_G045004	Nor	PA_chr10_G000455	1.37e-09	2.56e-14	1.37e-09
N1.HOG0000011	Lodge	PS_chr05_G020892	Nor	PA_chr12_G002258	1.37e-09	7.95e-13	1.37e-09
N1.HOG0000011	Lodge	PS_chr09_G039561	Nor	PA_chr10_G000455	1.38e-09	4.31e-13	1.38e-09
N1.HOG0000011	Lodge	PS_chr06_G025437	Nor	PA_chr05_G002742	1.44e-09	1.59e-14	1.44e-09
N1.HOG0000011	Lodge	PS_chr08_G033076	Nor	PA_chr04_G001601	2.93e-15	1.60e-09	1.6e-09
N1.HOG0000011	Lodge	PS_chr06_G025437	Nor	PA_chr07_G006119	1.75e-09	6.23e-20	1.75e-09
N1.HOG0000011	Lodge	PS_chr05_G021049	Nor	PA_chr12_G001527	2.01e-09	1.70e-10	2.01e-09
N1.HOG0000011	Lodge	PS_chr11_G044997	Nor	PA_chr12_G001527	2.10e-09	2.17e-11	2.1e-09
[truncated: 194,184 more rows]
